# Supplementary material for: Consistent dissection of the protein interaction network by combining global and local metrics
Source: PubMed Central journal article supplement (PMC2246273; doi:10.1186/gb-2007-8-12-r271), 2007-12-21
Supplement: gb-2007-8-12-r271-S2.pdf [file gb-2007-8-12-r271-S2.pdf]

Predicted protein interaction modules by the BCD algorithm on the unfiltered dataset. For each predicted module, the first row displays the module id, the enriched GO terms and P-value for that enrichment (if applicable). If the predicted module overlaps with a MIPS complex, the best-matching MIPS complex's name, id and size will be shown on the same row as well. From the second row, the name and annotation of each member of the predicted module are shown in one independent row. If a member of a predicted module is within an overlapping MIPS complex, the name of that member will be highlighted with blue color.

|         |                                                                                                                                                                                                                                                                                                                                                                                                                                                                                                                     |
|---------|---------------------------------------------------------------------------------------------------------------------------------------------------------------------------------------------------------------------------------------------------------------------------------------------------------------------------------------------------------------------------------------------------------------------------------------------------------------------------------------------------------------------|
| 0001    | GO_TERM:[biological_process] P-Value:9.6e-02                                                                                                                                                                                                                                                                                                                                                                                                                                                                        |
| YBR056W |                                                                                                                                                                                                                                                                                                                                                                                                                                                                                                                     |
| YFR007W |                                                                                                                                                                                                                                                                                                                                                                                                                                                                                                                     |
| 0002    | GO_TERM:[catalytic activity] P-Value:7.3e-02                                                                                                                                                                                                                                                                                                                                                                                                                                                                        |
| YDR403W | [DIT1] Sporulation-specific enzyme required for spore wall maturation, involved in the production of a soluble LL-dityrosine-containing precursor of the spore wall; transcripts accumulate at the time of prospore enclosure first enzyme in dityrosine synthesis in the outer layer of the spore wall pathway, converting L-tyrosine to N-formyl-L-tyrosine lack outermost layer of spore wall                                                                                                                    |
| YKR053C | [YSR3] Dihydroshingosine 1-phosphate phosphatase, membrane protein involved in sphingolipid metabolism; has similarity to Lcb3p DHS-1-P phosphatase Null mutant is viable and accumulates of dihydroshingosine-1-P                                                                                                                                                                                                                                                                                                  |
| 0003    | GO_TERM:[cellular_component] P-Value:5.8e-02                                                                                                                                                                                                                                                                                                                                                                                                                                                                        |
| YFL065C |                                                                                                                                                                                                                                                                                                                                                                                                                                                                                                                     |
| YLR415C |                                                                                                                                                                                                                                                                                                                                                                                                                                                                                                                     |
| 0004    | GO_TERM:[double-stranded DNA binding] P-Value:2.4e-05                                                                                                                                                                                                                                                                                                                                                                                                                                                               |
| YGL033W | [HOP2] Meiosis-specific protein that localizes to chromosomes, preventing synapsis between nonhomologous chromosomes and ensuring synapsis between homologs; complexes with Mnd1p to promote homolog pairing and meiotic double-strand break repair meiosis-specific gene required for the pairing of similar chromosomes Null mutant is viable; homozygous hop2 null diploids arrest in meiotic prophase prior to the first meiotic division                                                                       |
| YGL183C | [MND1] Protein required for recombination and meiotic nuclear division; forms a complex with Hop2p, which is involved in chromosome pairing and repair of meiotic double-strand breaks Null mutant is viable; arrests after DNA-replication but before nuclear divisions after shift to sporulation medium.                                                                                                                                                                                                         |
| 0005    | GO_TERM:[cellular_component] P-Value:5.8e-02                                                                                                                                                                                                                                                                                                                                                                                                                                                                        |
| YHR151C |                                                                                                                                                                                                                                                                                                                                                                                                                                                                                                                     |
| YNL193W |                                                                                                                                                                                                                                                                                                                                                                                                                                                                                                                     |
| 0006    | GO_TERM:[transport] P-Value:1.0e-01                                                                                                                                                                                                                                                                                                                                                                                                                                                                                 |
| YJL094C | [KHA1] Putative K <sup>+</sup> /H <sup>+</sup> antiporter                                                                                                                                                                                                                                                                                                                                                                                                                                                           |
| YLR193C |                                                                                                                                                                                                                                                                                                                                                                                                                                                                                                                     |
| 0007    | GO_TERM:[regulation of transcription from RNA polymerase II promoter] P-Value:2.3e-02                                                                                                                                                                                                                                                                                                                                                                                                                               |
| YJL127C | [SPT10] Putative histone acetylase, required for transcriptional regulation at core promoters, functions at or near the TATA box transcriptional regulator Suppression of transcriptional defect of UAS-less <i>sta1</i> gene; suppression of salt-sensitive phenotype caused by elevated TATA-binding protein; ts growth, reduced sporulation efficiency, sensitivity to heat shock & N starvation. Disruption of SPT10 lethal at high [Cu], correlated with slower induction and reduced max levels of CUP1 mRNA. |
| YMR179W | [SPT21] Protein required for normal transcription at several loci including HTA2-HTB2 and HHF2-HHT2, but not required at the other histone loci; functionally related to Spt10p; involved in telomere maintenance non-specific DNA binding protein Null mutant is viable, spt21 mutations suppress Ty insertion mutations                                                                                                                                                                                           |
| 0008    |                                                                                                                                                                                                                                                                                                                                                                                                                                                                                                                     |
| YMR325W | [YMR325W] Hypothetical protein                                                                                                                                                                                                                                                                                                                                                                                                                                                                                      |
| YPR199C | [ARR1] Transcriptional activator of the bZIP family, required for transcription of genes involved in resistance to arsenic compounds Null mutant is viable, confers arsenite and arsenate hypersensitivity                                                                                                                                                                                                                                                                                                          |
| 0009    | GO_TERM:[cellular_component] P-Value:1.5e-01                                                                                                                                                                                                                                                                                                                                                                                                                                                                        |
| YNL316C | [PHA2] Prephenate dehydratase, catalyzes the conversion of prephanate to phenylpyruvate, which is a step in the phenylalanine biosynthesis pathway prephenate dehydratase                                                                                                                                                                                                                                                                                                                                           |

|                         |                                                                                                                                                                                                                                                                                                                                                                                                                                                                                                                                                                                                               |
|-------------------------|---------------------------------------------------------------------------------------------------------------------------------------------------------------------------------------------------------------------------------------------------------------------------------------------------------------------------------------------------------------------------------------------------------------------------------------------------------------------------------------------------------------------------------------------------------------------------------------------------------------|
| YFL051C                 |                                                                                                                                                                                                                                                                                                                                                                                                                                                                                                                                                                                                               |
| YKL026C                 | [GPX1] Phospholipid hydroperoxide glutathione peroxidase induced by glucose starvation that protects cells from phospholipid hydroperoxides and nonphospholipid peroxides during oxidative stress                                                                                                                                                                                                                                                                                                                                                                                                             |
| 0010                    | GO_TERM:[nucleus] P-Value:6.9e-01                                                                                                                                                                                                                                                                                                                                                                                                                                                                                                                                                                             |
| YER169W                 | [RPH1] Transcriptional repressor of PHR1, which is a photolyase induced by DNA damage; binds to AG(4) (C(4)T) sequence upstream of PHR1; Rph1p phosphorylation during DNA damage is under control of the MEC1-RAD53 pathway binds to PHR1 URS transcriptional repressor Null mutation is viable, exhibits minor de-repression of PHR1 expression                                                                                                                                                                                                                                                              |
| YPL071C                 |                                                                                                                                                                                                                                                                                                                                                                                                                                                                                                                                                                                                               |
| 0011                    | GO_TERM:[phosphoinositide-mediated signaling] P-Value:1.5e-07                                                                                                                                                                                                                                                                                                                                                                                                                                                                                                                                                 |
| YKR019C                 | [IRS4] Protein involved in regulation of phosphatidylinositol 4,5-bisphosphate concentrations; Irs4p and Tax4p bind and activate the phosphatase Inp51p; mutation confers an increase in rDNA silencing Null mutant is viable and shows increased rDNA silencing                                                                                                                                                                                                                                                                                                                                              |
| YIL002C                 | [INP51] Phosphatidylinositol 4,5-bisphosphate 5-phosphatase, synaptojanin-like protein with an N-terminal Sac1 domain, plays a role in phosphatidylinositol 4,5-bisphosphate homeostasis and in endocytosis; null mutation confers cold-tolerant growth phosphatidylinositol 4,5-bisphosphate 5-phosphatase Null mutant is viable, has abnormal vacuoles                                                                                                                                                                                                                                                      |
| YJL083W                 | [TAX4] Protein involved in regulation of phosphatidylinositol 4,5-bisphosphate concentrations; Irs4p and Tax4p bind and activate the phosphatase Inp51p                                                                                                                                                                                                                                                                                                                                                                                                                                                       |
| 0012                    | GO_TERM:[catalytic activity] P-Value:7.3e-02 OVERLAP:[Glycine decarboxylase] <200> SIZE:4                                                                                                                                                                                                                                                                                                                                                                                                                                                                                                                     |
| <a href="#">YAL044C</a> | [GCV3] H subunit of the mitochondrial glycine decarboxylase complex, required for the catabolism of glycine to 5,10-methylene-THF; expression is regulated by levels of levels of 5,10-methylene-THF in the cytoplasm glycine cleavage system H-protein subunit Null mutant is viable but does not grow if glycine is the sole nitrogen source                                                                                                                                                                                                                                                                |
| YLR239C                 | [LIP2] Lipoyl ligase, involved in the modification of mitochondrial enzymes by the attachment of lipoic acid groups Lipoyl ligase Slow growth with glycine as a sole nitrogen source; Slow growth with glycerol as a sole carbon source, rescued by addition of ethanol                                                                                                                                                                                                                                                                                                                                       |
| 0013                    | GO_TERM:[response to stimulus] P-Value:3.1e-02                                                                                                                                                                                                                                                                                                                                                                                                                                                                                                                                                                |
| YIL117C                 | [PRM5] Pheromone-regulated protein, predicted to have 1 transmembrane segment; induced during cell integrity signaling                                                                                                                                                                                                                                                                                                                                                                                                                                                                                        |
| YOL116W                 | [MSN1] Transcriptional activator involved in regulation of invertase and glucoamylase expression, invasive growth and pseudohyphal differentiation, iron uptake, chromium accumulation, and response to osmotic stress; localizes to the nucleus transcriptional activator Null mutant is viable, exhibits a decrease in invertase expression; exhibits a reduction in wild-type iron uptake by 2-fold in cells grown in raffinose, but has no effect on glucose grown cells; exhibits media-specific extinction of glucoamylase synthesis; exhibits reduced pseudohyphal differentiation and invasive growth |
| 0014                    | GO_TERM:[catalytic activity] P-Value:7.3e-02                                                                                                                                                                                                                                                                                                                                                                                                                                                                                                                                                                  |
| YER175C                 | [TMT1] Trans-aconitate methyltransferase, cytosolic enzyme that catalyzes the methyl esterification of 3-isopropylmalate, an intermediate of the leucine biosynthetic pathway, and trans-aconitate, which inhibits the citric acid cycle                                                                                                                                                                                                                                                                                                                                                                      |
| YLR158C                 | [ASP3-3] Cell-wall L-asparaginase II, involved in asparagine catabolism; expression is induced during nitrogen starvation; four copies of ASP3 are present in the genome reference strain S288C nitrogen catabolite-regulated cell-wall L-asparaginase II                                                                                                                                                                                                                                                                                                                                                     |
| 0015                    | GO_TERM:[biological_process] P-Value:9.6e-02                                                                                                                                                                                                                                                                                                                                                                                                                                                                                                                                                                  |
| YDL146W                 | [LDB17] Protein of unknown function; GFP-fusion protein localizes to the cell periphery, cytoplasm, bud, and bud neck; null mutant shows a reduced affinity for the alcian blue dye suggesting a decreased net negative charge of the cell surface                                                                                                                                                                                                                                                                                                                                                            |
| YKL070W                 |                                                                                                                                                                                                                                                                                                                                                                                                                                                                                                                                                                                                               |
| 0016                    | GO_TERM:[carbon-carbon lyase activity] P-Value:3.5e-04                                                                                                                                                                                                                                                                                                                                                                                                                                                                                                                                                        |
| YDR332W                 | [YDR332W] Hypothetical protein; null mutant displays increased levels of spontaneous Rad52 foci                                                                                                                                                                                                                                                                                                                                                                                                                                                                                                               |
| YEL021W                 | [URA3] Orotidine-5'-phosphate (OMP) decarboxylase, catalyzes the sixth enzymatic step in the de novo biosynthesis of pyrimidines, converting OMP into uridine monophosphate (UMP); converts 5-FOA into 5-fluorouracil, a toxic compound orotidine-5'-phosphate decarboxylase Null mutant is viable, uracil auxotroph                                                                                                                                                                                                                                                                                          |
| YMR074C                 |                                                                                                                                                                                                                                                                                                                                                                                                                                                                                                                                                                                                               |
| YNL256W                 | [FOL1] Multifunctional enzyme of the folic acid biosynthesis pathway, has dihydropteroate synthetase, dihydro-6-hydroxymethylpterin pyrophosphokinase, and dihydroneopterin aldolase activities dihydro-6-hydroxymethylpterin pyrophosphokinase dihydroneopterin aldolase dihydropteroate synthetase essential, induces pseudohyphal growth                                                                                                                                                                                                                                                                   |
| 0017                    | GO_TERM:[alcohol metabolism] P-Value:6.6e-02 OVERLAP:[Tubulin-associated proteins] <140.30.20> SIZE:14                                                                                                                                                                                                                                                                                                                                                                                                                                                                                                        |
| YNR075W                 | [COS10] Protein of unknown function, member of the DUP380 subfamily of conserved, often subtelomerically-encoded proteins                                                                                                                                                                                                                                                                                                                                                                                                                                                                                     |
| YLL012W                 | [YEH1] Steryl ester hydrolase, one of three gene products (Yeh1p, Yeh2p, Tgl1p) responsible for steryl ester hydrolase activity and involved in                                                                                                                                                                                                                                                                                                                                                                                                                                                               |

|                |                                                                                                                                                                                                                                                                                                                          |
|----------------|--------------------------------------------------------------------------------------------------------------------------------------------------------------------------------------------------------------------------------------------------------------------------------------------------------------------------|
|                | sterol homeostasis; localized to lipid particle membranes steryl ester hydrolase                                                                                                                                                                                                                                         |
| YOR095C        | [RKI1] Ribose-5-phosphate ketol-isomerase, catalyzes the interconversion of ribose 5-phosphate and ribulose 5-phosphate in the pentose phosphate pathway; participates in pyridoxine biosynthesis ribose-5-phosphate ketol-isomerase                                                                                     |
| <b>YOR265W</b> | [RBL2] Protein involved in microtubule morphogenesis, required for protection from excess free beta-tubulin; proposed to be involved the folding of beta-tubulin tubulin folding cofactor A Overexpression rescues lethality caused by excess beta-tubulin                                                               |
| YER152C        |                                                                                                                                                                                                                                                                                                                          |
| YJL107C        |                                                                                                                                                                                                                                                                                                                          |
| 0018           | GO_TERM:[transcription corepressor activity] P-Value:4.1e-05 OVERLAP:[NC2 complex] <510.190.190> SIZE:2                                                                                                                                                                                                                  |
| <b>YDR397C</b> | [NCB2] Beta subunit of the NC2 dimeric histone-fold complex; represses RNA polymerase II transcription through binding to TBP and inhibition of TFIIA and TFIIIB; homologous to the Dr1 subunit of the mammalian NC2 (negative cofactor2)                                                                                |
| <b>YER159C</b> | [BUR6] Protein that forms a heterodimeric histone-fold NC2 general transcription regulator complex with Ydr1p that binds to TBP and represses RNA pol II transcription during assembly of the preinitiation complex, homologous to human NC2alpha transcriptional regulator Null mutant is viable, but grows very poorly |
| 0019           | GO_TERM:[biological_process] P-Value:2.3e-01                                                                                                                                                                                                                                                                             |
| YOR118W        |                                                                                                                                                                                                                                                                                                                          |
| YGR035C        |                                                                                                                                                                                                                                                                                                                          |
| YOR031W        | [CRS5] Copper-binding metallothionein, required for wild-type copper resistance metallothionein-like protein Null mutant is viable, exhibits increased sensitivity to copper toxicity                                                                                                                                    |
| 0020           | GO_TERM:[nucleotide metabolism] P-Value:8.6e-03 OVERLAP:[F0/F1 ATP synthase (complex V)] <420.50> SIZE:18                                                                                                                                                                                                                |
| YJR133W        | [XPT1] Xanthine-guanine phosphoribosyl transferase, required for xanthine utilization and for optimal utilization of guanine xanthine phosphoribosyl transferase Cannot utilize xanthine as a source of GMP                                                                                                              |
| YDL045C        | [FAD1] Flavin adenine dinucleotide (FAD) synthetase, performs the second step in synthesis of FAD from riboflavin FAD synthetase                                                                                                                                                                                         |
| YGL226W        |                                                                                                                                                                                                                                                                                                                          |
| YLR168C        |                                                                                                                                                                                                                                                                                                                          |
| YIL157C        | [YIL157C] The authentic, non-tagged protein was localized to the mitochondria                                                                                                                                                                                                                                            |
| YDR530C        | [APA2] Diadenosine 5',5''-P1,P4-tetraphosphate phosphorylase II (AP4A phosphorylase), involved in catabolism of bis(5'-nucleosidyl) tetraphosphates; has similarity to Apa1p 5',5''-P-1,P-4-tetraphosphate phosphorylase II                                                                                              |
| YJL225C        |                                                                                                                                                                                                                                                                                                                          |
| YIR036C        |                                                                                                                                                                                                                                                                                                                          |
| YJR120W        |                                                                                                                                                                                                                                                                                                                          |
| <b>YLR295C</b> | [ATP14] Subunit h of the F0 sector of mitochondrial F1F0 ATP synthase, which is a large, evolutionarily conserved enzyme complex required for ATP synthesis ATP synthase subunit h unable to grow on glycerol medium; no detectable oligomycin-sensitive ATPase activity                                                 |
| YML079W        |                                                                                                                                                                                                                                                                                                                          |
| 0021           | GO_TERM:[catabolism] P-Value:1.2e-01                                                                                                                                                                                                                                                                                     |
| YMR293C        |                                                                                                                                                                                                                                                                                                                          |
| YPL052W        | [OAZ1] Regulator of ornithine decarboxylase (Spe1p), antizyme that binds to Spe1p to regulate ubiquitin-independent degradation; ribosomal frameshifting during synthesis of Oaz1p and its ubiquitin-mediated degradation are both polyamine-regulated                                                                   |
| YLR156W        |                                                                                                                                                                                                                                                                                                                          |
| YLR118C        |                                                                                                                                                                                                                                                                                                                          |
| YNL144C        |                                                                                                                                                                                                                                                                                                                          |
| YEL075C        |                                                                                                                                                                                                                                                                                                                          |
| YCL050C        | [APA1] Diadenosine 5',5''-P1,P4-tetraphosphate phosphorylase I (AP4A phosphorylase), involved in catabolism of bis(5'-nucleosidyl) tetraphosphates; has similarity to Apa2p diadenosine 5',5''-P1,P4-tetraphosphate phosphorylase I                                                                                      |
| YCL005W        | [LDB16] Protein of unknown function; null mutant shows a reduced affinity for the alcian blue dye suggesting a decreased net negative charge of the cell surface                                                                                                                                                         |
| YHR049W        | [FSH1] Serine hydrolase that localizes to both the nucleus and cytoplasm; sequence is similar to Fsh2p and Fsh3p                                                                                                                                                                                                         |
| YBR076W        | [ECM8] Non-essential protein of unknown function                                                                                                                                                                                                                                                                         |
| YGR042W        |                                                                                                                                                                                                                                                                                                                          |
| YER058W        | [PET117] Protein required for assembly of cytochrome c oxidase petite; unable to grow on non-fermentable carbon sources                                                                                                                                                                                                  |

|                |                                                                                                                                                                                                                                                                                                                                                                                    |
|----------------|------------------------------------------------------------------------------------------------------------------------------------------------------------------------------------------------------------------------------------------------------------------------------------------------------------------------------------------------------------------------------------|
| YCL074W        |                                                                                                                                                                                                                                                                                                                                                                                    |
| YDR031W        |                                                                                                                                                                                                                                                                                                                                                                                    |
| YLR205C        | [HMX1] ER localized, heme-binding peroxidase involved in the degradation of heme; does not exhibit heme oxygenase activity despite similarity to heme oxygenases; expression regulated by AFT1                                                                                                                                                                                     |
| YKR087C        | [OMA1] Metalloendopeptidase of the mitochondrial inner membrane, involved in turnover of membrane-embedded proteins; member of a family of predicted membrane-bound metallopeptidases in prokaryotes and higher eukaryotes                                                                                                                                                         |
| YMR278W        |                                                                                                                                                                                                                                                                                                                                                                                    |
| YMR160W        |                                                                                                                                                                                                                                                                                                                                                                                    |
| YNL241C        | [ZWF1] Glucose-6-phosphate dehydrogenase (G6PD), catalyzes the first step of the pentose phosphate pathway; involved in adapting to oxidatve stress; homolog of the human G6PD which is deficient in patients with hemolytic anemia glucose-6-phosphate dehydrogenase                                                                                                              |
| YJR091C        | [JSN1] Member of the Puf family of RNA-binding proteins, interacts with mRNAs encoding membrane-associated proteins; overexpression suppresses a tub2-150 mutation and causes increased sensitivity to benomyl in wild-type cells Overexpression suppresses some tub2 alleles and confers greater benomyl sensitivity                                                              |
| YPL158C        |                                                                                                                                                                                                                                                                                                                                                                                    |
| 0022           | GO_TERM:[catalytic activity] P-Value:1.8e-01                                                                                                                                                                                                                                                                                                                                       |
| YDR038C        | [ENA5] Protein with similarity to P-type ATPase sodium pumps Na+ ATPase                                                                                                                                                                                                                                                                                                            |
| YDR380W        | [ARO10] Phenylpyruvate decarboxylase, catalyzes decarboxylation of phenylpyruvate to phenylacetaldehyde, which is the first specific step in the Ehrlich pathway                                                                                                                                                                                                                   |
| YOR382W        | [FIT2] Mannoprotein that is incorporated into the cell wall via a glycosylphosphatidylinositol (GPI) anchor, involved in the retention of siderophore-iron in the cell wall                                                                                                                                                                                                        |
| 0023           | GO_TERM:[lipid transport] P-Value:2.8e-06                                                                                                                                                                                                                                                                                                                                          |
| YLL048C        | [YBT1] Transporter of the ATP-binding cassette (ABC) family involved in bile acid transport; similar to mammalian bile transporters                                                                                                                                                                                                                                                |
| YKL188C        | [PXA2] Subunit of a heterodimeric peroxisomal ATP-binding cassette transporter complex (Pxa1p-Pxa2p), required for import of long-chain fatty acids into peroxisomes; similarity to human adrenoleukodystrophy transporter and ALD-related proteins ABC transporter 2 Null mutant is viable; reduces stability of Pxa1p                                                            |
| YPL145C        | [KES1] Member of the oxysterol binding protein family, which includes seven yeast homologs; involved in negative regulation of Sec14p-dependent Golgi complex secretory functions, peripheral membrane protein that localizes to the Golgi complex                                                                                                                                 |
| YPL147W        | [PXA1] Subunit of a heterodimeric peroxisomal ATP-binding cassette transporter complex (Pxa1p-Pxa2p), required for import of long-chain fatty acids into peroxisomes; similarity to human adrenoleukodystrophy transporter and ALD-related proteins ABC transporter of long-chain fatty acids Null mutant is viable but cannot grow on media with oleic acid as sole carbon source |
| 0024           | GO_TERM:[mitochondrial inner membrane peptidase complex] P-Value:4.2e-09 OVERLAP:[Inner membrane protease] <350.20> SIZE:2                                                                                                                                                                                                                                                         |
| YDR119W        |                                                                                                                                                                                                                                                                                                                                                                                    |
| YHR078W        |                                                                                                                                                                                                                                                                                                                                                                                    |
| <b>YMR035W</b> | [IMP2] Catalytic subunit of the mitochondrial inner membrane peptidase complex, required for maturation of mitochondrial proteins of the intermembrane space; complex contains Imp1p and Imp2p (both catalytic subunits), and Som1p protease                                                                                                                                       |
| YEL059C-A      | [SOM1] Subunit of the mitochondrial inner membrane peptidase, which is required for maturation of mitochondrial proteins of the intermembrane space; Som1p facilitates cleavage of a subset of substrates Null mutant is viable; proteolytic processing is prevented or reduced                                                                                                    |
| <b>YMR150C</b> | [IMP1] Catalytic subunit of the mitochondrial inner membrane peptidase complex, required for maturation of mitochondrial proteins of the intermembrane space; complex contains Imp1p and Imp2p (both catalytic subunits), and Som1p inner membrane protease petite; unable to grow on non-fermentable carbon sources                                                               |
| 0025           | GO_TERM:[biological_process] P-Value:9.6e-02                                                                                                                                                                                                                                                                                                                                       |
| YOR131C        |                                                                                                                                                                                                                                                                                                                                                                                    |
| YPL034W        |                                                                                                                                                                                                                                                                                                                                                                                    |
| 0026           | GO_TERM:[oxidoreductase activity] P-Value:7.8e-03                                                                                                                                                                                                                                                                                                                                  |
| YBR265W        | [TSC10] 3-ketosphinganine reductase, catalyzes the second step in phytosphingosine synthesis, essential for growth in the absence of exogenous dihydrosphingosine or phytosphingosine, member of short chain dehydrogenase/reductase protein family 3-ketosphinganine reductase                                                                                                    |
| YCR107W        | [AAD3] Putative aryl-alcohol dehydrogenase with similarity to P. chryso sporium aryl-alcohol dehydrogenase; mutational analysis has not yet revealed a physiological role aryl-alcohol dehydrogenase (putative)                                                                                                                                                                    |
| YOR114W        |                                                                                                                                                                                                                                                                                                                                                                                    |
| 0027           | GO_TERM:[molecular_function] P-Value:1.7e-01                                                                                                                                                                                                                                                                                                                                       |

|           |                                                                                                                                                                                                                                                                                                                                                                                                                                                                                                             |
|-----------|-------------------------------------------------------------------------------------------------------------------------------------------------------------------------------------------------------------------------------------------------------------------------------------------------------------------------------------------------------------------------------------------------------------------------------------------------------------------------------------------------------------|
| YCR032W   | [BPH1] Protein homologous to human Chediak-Higashi syndrome protein and murine beige gene, which are implicated in disease syndromes due to defective lysosomal trafficking Null mutant is viable, sensitive to low pH                                                                                                                                                                                                                                                                                      |
| YOL057W   |                                                                                                                                                                                                                                                                                                                                                                                                                                                                                                             |
| 0028      | GO_TERM:[oxidoreductase activity, acting on the CH-OH group of donors, NAD or NADP as acceptor] P-Value:3.4e-04                                                                                                                                                                                                                                                                                                                                                                                             |
| YAL060W   | [BDH1] NAD-dependent (2R,3R)-2,3-butanediol dehydrogenase, a zinc-containing medium-chain alcohol dehydrogenase, produces 2,3-butanediol from acetoin during fermentation and allows using 2,3-butanediol as a carbon source during aerobic growth                                                                                                                                                                                                                                                          |
| YAL061W   |                                                                                                                                                                                                                                                                                                                                                                                                                                                                                                             |
| 0029      |                                                                                                                                                                                                                                                                                                                                                                                                                                                                                                             |
| YGL032C   | [AGA2] Adhesion subunit of a-agglutinin of a-cells, C-terminal sequence acts as a ligand for alpha-agglutinin (Sag1p) during agglutination, modified with O-linked oligomannosyl chains, linked to anchorage subunit Aga1p via two disulfide bonds a-agglutinin adhesion subunit                                                                                                                                                                                                                            |
| YGR257C   | [MTM1] Mitochondrial protein of the mitochondrial carrier family, involved in activating mitochondrial Sod2p probably by facilitating insertion of an essential manganese cofactor putative mitochondrial carrier protein Null: strong loss of SOD2 activity, mitochondrial iron accumulation                                                                                                                                                                                                               |
| 0030      | GO_TERM:[nucleolus] P-Value:1.9e-01                                                                                                                                                                                                                                                                                                                                                                                                                                                                         |
| YDR339C   | [FCF1] Nucleolar protein involved in pre-mRNA processing                                                                                                                                                                                                                                                                                                                                                                                                                                                    |
| YGL006W   | [PMC1] Vacuolar Ca <sup>2+</sup> ATPase involved in depleting cytosol of Ca <sup>2+</sup> ions; prevents growth inhibition by activation of calcineurin in the presence of elevated concentrations of calcium Ca <sup>2+</sup> ATPase (putative) Null mutant is viable but fails to grow in high Ca <sup>2+</sup> medium; this death in high calcium is suppressed by mutations in calcineurin (CNA1, CNA2, CNB1) and calmodulin (CMD1); pmc1 vex1 double mutant is even more sensitive to Ca <sup>2+</sup> |
| YBR186W   | [PCH2] Nucleolar component of the pachytene checkpoint, which prevents chromosome segregation when recombination and chromosome synapsis are defective; also represses meiotic interhomolog recombination in the rDNA ATPase (putative) Null mutant is viable and bypasses meiotic arrest of zip1 mutant, resulting in chromosome segregation defects                                                                                                                                                       |
| YHR104W   | [GRE3] Aldose reductase involved in methylglyoxal, d-xylose and arabinose metabolism; stress induced (osmotic, ionic, oxidative, heat shock, starvation and heavy metals); regulated by the HOG pathway aldose reductase                                                                                                                                                                                                                                                                                    |
| 0031      | GO_TERM:[molecular_function] P-Value:1.7e-01                                                                                                                                                                                                                                                                                                                                                                                                                                                                |
| YKR065C   | [PAM17] Presequence translocase-associated motor subunit, required for stable complex formation between cochaperones Pam16p and Pam18p, promotes association of Pam16p-Pam18p with the presequence translocase                                                                                                                                                                                                                                                                                              |
| YLR036C   |                                                                                                                                                                                                                                                                                                                                                                                                                                                                                                             |
| 0032      |                                                                                                                                                                                                                                                                                                                                                                                                                                                                                                             |
| YLR204W   | [QRI5] Mitochondrial protein of unknown function                                                                                                                                                                                                                                                                                                                                                                                                                                                            |
| YMR299C   | [DYN3] Dynein light intermediate chain (LIC); localizes with dynein, null mutant is defective in nuclear migration Light intermediate chain of dynein                                                                                                                                                                                                                                                                                                                                                       |
| 0033      | GO_TERM:[transporter activity] P-Value:9.2e-03                                                                                                                                                                                                                                                                                                                                                                                                                                                              |
| YGL027C   | [CWH41] Processing alpha glucosidase I, ER type II integral membrane N-glycoprotein involved in assembly of cell wall beta 1,6 glucan and asparagine-linked protein glycosylation; also involved in ER protein quality control and sensing of ER stress glucosidase I Null mutant is viable, associated with K1 killer toxin-resistant phenotype and a 50% reduction in the cell wall beta 1,6-glucan level                                                                                                 |
| YNR002C   | [ATO2] Putative transmembrane protein, involved in the export of ammonia, a starvation signal that promotes cell death in the center of aging colonies; member of the TC 9.B.33 YaaH family; homolog of Ady2p and Y. lipolytica Gpr1p transmembrane protein (putative) Null mutant is viable. Other phenotype: defect in ammonia production in S.cerevisiae colonies                                                                                                                                        |
| YOR130C   | [ORT1] Ornithine transporter of the mitochondrial inner membrane, exports ornithine from mitochondria as part of arginine biosynthesis; human ortholog is associated with hyperammonaemia-hyperornithinaemia-homocitrullinuria (HHH) syndrome Null mutant is viable, arginine bradytroph                                                                                                                                                                                                                    |
| 0034      | GO_TERM:[mitochondrial intermembrane space] P-Value:1.5e-06                                                                                                                                                                                                                                                                                                                                                                                                                                                 |
| YKL084W   | [HOT13] Mitochondrial intermembrane space protein, first component of a pathway mediating assembly of small TIM (Translocase of the Inner Membrane) complexes which escort hydrophobic inner membrane proteins en route to the TIM22 complex Assembly factor for the Translocase of the Inner Membrane complexes                                                                                                                                                                                            |
| YGR181W   | [TIM13] Mitochondrial intermembrane space protein, forms a complex with Tim8p that mediates import and insertion of a subset of polytopic inner membrane proteins; may prevent aggregation of incoming proteins in a chaperone-like manner                                                                                                                                                                                                                                                                  |
| YJR135W-A | [TIM8] Mitochondrial intermembrane space protein mediating import and insertion of polytopic inner membrane proteins; homolog of human DDP1 (deafness dystonia peptide 1) which is mutated in the X-linked Mohr-Tranebjaerg syndrome mitochondrial protein import machinery subunit                                                                                                                                                                                                                         |

|                  |                                                                                                                                                                                                                                                                                                                                                                                                                                                                                                                                                                                                                         |
|------------------|-------------------------------------------------------------------------------------------------------------------------------------------------------------------------------------------------------------------------------------------------------------------------------------------------------------------------------------------------------------------------------------------------------------------------------------------------------------------------------------------------------------------------------------------------------------------------------------------------------------------------|
| 0035             | GO_TERM:[mitochondrial membrane part] P-Value:4.6e-12 OVERLAP:[TOM - transport across the outer membrane] <290.10> SIZE:9                                                                                                                                                                                                                                                                                                                                                                                                                                                                                               |
| Q0105            | [COB] Cytochrome b, mitochondrially encoded subunit of the ubiquinol-cytochrome c reductase complex which includes Cobp, Rip1p, Cyt1p, Cor1p, Qcr2p, Qcr6p, Qcr7p, Qcr8p, Qcr9p, and Qcr10p cytochrome b                                                                                                                                                                                                                                                                                                                                                                                                                |
| YHL038C          | [CBP2] Mitochondrial protein required for splicing of the group I intron a15 of the COB pre-mRNA, binds to the RNA to promote splicing; also involved in but not essential for splicing of the COB b12 intron and the intron in the 21S rRNA gene                                                                                                                                                                                                                                                                                                                                                                       |
| YBL042C          | [FUI1] High affinity uridine permease, localized to the plasma membrane; not involved in uracil transport uridine permease                                                                                                                                                                                                                                                                                                                                                                                                                                                                                              |
| YIL155C          | [GUT2] Mitochondrial glycerol-3-phosphate dehydrogenase; expression is repressed by both glucose and cAMP and derepressed by non-fermentable carbon sources in a Snf1p, Rsf1p, Hap2/3/4/5 complex dependent manner glycerol-3-phosphate dehydrogenase Null mutant is viable, unable to utilize glycerol as a carbon source                                                                                                                                                                                                                                                                                              |
| YFR033C          | [QCR6] Subunit 6 of the ubiquinol cytochrome-c reductase complex, which is a component of the mitochondrial inner membrane electron transport chain; highly acidic protein; required for maturation of cytochrome c1 ubiquinol cytochrome C oxidoreductase subunit 6 (17 kDa) Disruptants are viable but are temperature-sensitive petite, lacking ubiquinol-cytochrome c oxidoreductase activity and showing loss of assembly of cytochrome bc1 complex; qcr6 is suppressed by multicopy QCR9; shows synthetic interactions with qcr10; synthetically lethal with gre5 and qsr2                                        |
| YDR375C          | [BCS1] Protein of the mitochondrial inner membrane that functions as an ATP-dependent chaperone, required for the assembly of the cytochrome bc(1) complex from the Rip1p and Qcr10p proteins; member of the CDC48/PAS1/SEC18 ATPase family ATPase (AAA family) Gross reduction in the Rieske iron-sulfur subunit                                                                                                                                                                                                                                                                                                       |
| <b>YNL121C</b>   | [TOM70] Component of the TOM (translocase of outer membrane) complex responsible for recognition and initial import steps for all mitochondrially directed proteins; acts as a receptor for incoming precursor proteins 70 kDa mitochondrial specialized import receptor of the outer membrane Null mutant is viable but exhibits defects in mitochondrial import                                                                                                                                                                                                                                                       |
| <b>YGR082W</b>   | [TOM20] Component of the TOM (translocase of outer membrane) complex responsible for recognition and initial import steps for all mitochondrially directed proteins; acts as a receptor for incoming precursor proteins 20 kDa mitochondrial outer membrane protein import receptor                                                                                                                                                                                                                                                                                                                                     |
| <b>YMR203W</b>   | [TOM40] Component of the TOM (translocase of outer membrane) complex responsible for recognition and initial import steps for all mitochondrially directed proteins; constitutes the core element of the protein conducting pore mitochondrial outer membrane protein Null mutant is inviable; cells accumulate uncleaved mitochondrial precursor proteins                                                                                                                                                                                                                                                              |
| <b>YNL131W</b>   | [TOM22] Component of the TOM (translocase of outer membrane) complex responsible for initial import of mitochondrially directed proteins; acts as a receptor for precursor proteins and mediates interaction between the TOM and TIM complexes mitochondrial import receptor protein                                                                                                                                                                                                                                                                                                                                    |
| <b>YPR133W-A</b> | [TOM5] Small mitochondrial outer membrane protein crucial to a binding relay for the import of proteins into mitochondria; subunit on the outer mouth of the TOM channel that accepts precursors from the receptors Tom20p and Tom22p Null mutant is viable but is temperature-sensitive and shows defects in import of mitochondrial preproteins; synthetically lethal with tom6, tom7, tom20, tom37, and tom70                                                                                                                                                                                                        |
| 0036             | GO_TERM:[protein import into mitochondrial inner membrane] P-Value:2.6e-12 OVERLAP:[Tim22p-complex] <290.20.10> SIZE:5                                                                                                                                                                                                                                                                                                                                                                                                                                                                                                  |
| YBL113C          |                                                                                                                                                                                                                                                                                                                                                                                                                                                                                                                                                                                                                         |
| YLR348C          | [DIC1] Mitochondrial dicarboxylate carrier, integral membrane protein, catalyzes a dicarboxylate-phosphate exchange across the inner mitochondrial membrane, transports cytoplasmic dicarboxylates into the mitochondrial matrix dicarboxylate transport protein                                                                                                                                                                                                                                                                                                                                                        |
| YAR023C          |                                                                                                                                                                                                                                                                                                                                                                                                                                                                                                                                                                                                                         |
| <b>YEL020W-A</b> | [TIM9] Mitochondrial intermembrane space protein, forms a complex with Mrs11p/Tim10p that mediates import and insertion of a subset of polytopic inner membrane proteins; may prevent aggregation of incoming proteins in a chaperone-like manner                                                                                                                                                                                                                                                                                                                                                                       |
| <b>YHR005C-A</b> | [MRS11] Essential protein of the mitochondrial intermembrane space, forms a complex with Tim9p (TIM10 complex) that mediates insertion of hydrophobic proteins at the inner membrane, has homology to Mrs5p, which is also involved in this process Null mutant is inviable; depletion of Mrs11p results in accumulation of the precursor form of mitochondrial hsp60, inability to form spectrophotometrically detectable amounts of cytochromes and changes in the mitochondrial morphology; when overexpressed, restores respiration competence to yeast defective in the splicing of mitochondrial group II introns |
| YOR297C          | [TIM18] Component of the mitochondrial Tim54p-Tim22p complex involved in insertion of polytopic proteins into the inner membrane; may function to stabilize the complex translocase                                                                                                                                                                                                                                                                                                                                                                                                                                     |
| <b>YDL217C</b>   | [TIM22] Component of the mitochondrial Tim54p-Tim22p complex involved in insertion of polytopic proteins into the inner membrane                                                                                                                                                                                                                                                                                                                                                                                                                                                                                        |
| <b>YBR091C</b>   | [MRS5] Essential protein of the inner mitochondrial membrane, peripherally localized; component of the TIM22 complex, which is a twin-pore translocase that mediates insertion of numerous multispinning inner membrane proteins Null mutant is inviable. Mrs5p depletion causes accumulation of unprocessed precursors of the mitochondrial hsp60 protein and defects in all cytochrome complexes                                                                                                                                                                                                                      |
| <b>YJL054W</b>   | [TIM54] Component of the mitochondrial Tim54p-Tim22p complex involved in insertion of polytopic proteins into the inner membrane Null mutant is inviable; the tim54-1 allele is temperature-sensitive and at the nonpermissive temperature is defective in the insertion of proteins into the mitochondrial inner membrane.                                                                                                                                                                                                                                                                                             |
| 0037             | GO_TERM:[mitochondrial inner membrane presequence translocase complex] P-Value:8.5e-24 OVERLAP:[Tim17p-complex] <290.20.20> SIZE:2                                                                                                                                                                                                                                                                                                                                                                                                                                                                                      |
| YML054C          | [CYB2] Cytochrome b2 (L-lactate cytochrome-c oxidoreductase), component of the mitochondrial intermembrane space, required for lactate utilization; expression is repressed by glucose and anaerobic conditions L-lactate cytochrome c oxidoreductase cytochrome b2 Null mutant is viable but is deficient in cytochrome b2 and L-lactate dehydrogenase activity and is unable to use L-lactate as a sole carbon source                                                                                                                                                                                                 |
| YNL310C          | [ZIM17] Heat shock protein with a zinc finger motif; essential for protein import into mitochondria; may act with Pam18p to facilitate recognition and folding of imported proteins by Ssc1p (mtHSP70) in the mitochondrial matrix                                                                                                                                                                                                                                                                                                                                                                                      |
| YDL091C          | [UBX3] UBX (ubiquitin regulatory X) domain-containing protein that interacts with Cdc48p, green fluorescent protein (GFP)-fusion protein localizes to the cytoplasm in a punctate pattern                                                                                                                                                                                                                                                                                                                                                                                                                               |

|                |                                                                                                                                                                                                                                                                                                                                                                                                                                                                                                                                                                                                             |
|----------------|-------------------------------------------------------------------------------------------------------------------------------------------------------------------------------------------------------------------------------------------------------------------------------------------------------------------------------------------------------------------------------------------------------------------------------------------------------------------------------------------------------------------------------------------------------------------------------------------------------------|
| YLR369W        | [SSQ1] Mitochondrial hsp70-type molecular chaperone, required for assembly of iron/sulfur clusters into proteins at a step after cluster synthesis, and for maturation of Yfh1p, which is a homolog of human frataxin implicated in Friedreich's ataxia HSP70 family chaperone Null mutant is viable, cold-sensitive, osmotically sensitive; ssq1 mutations can suppress the endogenous oxygen toxicity (methionine and lysine auxotrophies) of sod1 null mutants and exhibit diminished rates of respiratory oxygen consumption and reduced mitochondrial aconitase and succinate dehydrogenase activities |
| YJR045C        | [SSC1] Mitochondrial matrix ATPase that is a subunit of the presequence translocase-associated protein import motor (PAM); involved in protein translocation into the matrix and protein folding; member of the heat shock protein 70 (HSP70) family Endo.SceI endonuclease subunit mitochondrial matrix protein involved in protein import Null mutant is inviable; some alleles demonstrate effects in sporulation and germination                                                                                                                                                                        |
| YNL328C        | [MDJ2] Constituent of the mitochondrial import motor associated with the presequence translocase; function overlaps with that of Pam18p; stimulates the ATPase activity of Ssc1p to drive mitochondrial import; contains a J domain chaperonin Null mutant is viable, mdj1 mdj2 double mutants display severe growth defects at high temperature                                                                                                                                                                                                                                                            |
| YLR008C        | [PAM18] Constituent of the mitochondrial import motor associated with the presequence translocase, along with Ssc1p, Tim44p, Mge1p, and Pam16p; stimulates the ATPase activity of Ssc1p to drive mitochondrial import; contains a J domain DnaJ-like protein, cochaperone                                                                                                                                                                                                                                                                                                                                   |
| YIL022W        | [TIM44] Peripheral mitochondrial membrane protein involved in mitochondrial protein import, tethers essential chaperone Ssc1p to the translocon channel at the matrix side of the inner membrane                                                                                                                                                                                                                                                                                                                                                                                                            |
| <b>YNR017W</b> | [MAS6] Essential protein of the mitochondrial inner membrane, component of the mitochondrial import system 23 kDa mitochondrial inner membrane protein Null mutant is inviable; conditional mutants accumulate mitochondrial precursor proteins at restrictive temperature                                                                                                                                                                                                                                                                                                                                  |
| YGR033C        | [TIM21] Constituent of the mitochondrial inner membrane presequence translocase (TIM23 complex); may regulate protein import by binding to both the translocase of the outer membrane (TOM) and presequence-associated motor (PAM) complexes                                                                                                                                                                                                                                                                                                                                                                |
| YPL063W        | [TIM50] Constituent of the mitochondrial inner membrane presequence translocase (TIM23 complex); may promote binding of incoming precursor proteins to the intermembrane space domain of Tom22p during translocation                                                                                                                                                                                                                                                                                                                                                                                        |
| YJL104W        | [PAM16] Constituent of the mitochondrial import motor associated with the presequence translocase, along with Ssc1p, Tim44p, Mge1p, and Pam18p; has similarity to J-domain containing proteins Null mutant is inviable; MIA1 is required for respiration                                                                                                                                                                                                                                                                                                                                                    |
| <b>YJL143W</b> | [TIM17] Essential constituent of the mitochondrial inner membrane presequence translocase; interacts with Pam18p to recruit the presequence translocase-associated motor (PAM complex) and also required for protein sorting during import 16.5 kDa inner membrane protein required for import of mitochondrial precursor proteins                                                                                                                                                                                                                                                                          |
| 0038           | GO_TERM:[binding] P-Value:4.0e-01 OVERLAP:[cytoplasmic ribosomal large subunit] <500.40.10> SIZE:81                                                                                                                                                                                                                                                                                                                                                                                                                                                                                                         |
| YHR168W        | [MTG2] Putative GTPase, member of the Obg family; peripheral protein of the mitochondrial inner membrane that associates with the large ribosomal subunit; required for mitochondrial translation, possibly via a role in ribosome assembly GTPase                                                                                                                                                                                                                                                                                                                                                          |
| YDR492W        | [IZH1] Membrane protein involved in zinc metabolism, member of the four-protein IZH family; transcription is regulated directly by Zap1p, expression induced by zinc deficiency and fatty acids; deletion increases sensitivity to elevated zinc                                                                                                                                                                                                                                                                                                                                                            |
| YNL260C        |                                                                                                                                                                                                                                                                                                                                                                                                                                                                                                                                                                                                             |
| YJR067C        | [YAE1] Essential protein of unknown function                                                                                                                                                                                                                                                                                                                                                                                                                                                                                                                                                                |
| <b>YLR406C</b> | [RPL31B] Protein component of the large (60S) ribosomal subunit, nearly identical to Rpl31Ap and has similarity to rat L31 ribosomal protein; associates with the karyopherin Sxm1p ribosomal protein L31B (L34B) (YL28)                                                                                                                                                                                                                                                                                                                                                                                    |
| 0039           | GO_TERM:[pyridoxine metabolism] P-Value:2.4e-19                                                                                                                                                                                                                                                                                                                                                                                                                                                                                                                                                             |
| YDR533C        | [HSP31] Possible chaperone and cysteine protease with similarity to E. coli Hsp31 and S. cerevisiae Hsp32p, Hsp33p, and Sno4p; member of the DJ-1/ThiJ/PfpI superfamily, which includes human DJ-1 involved in Parkinson's disease; exists as a dimer                                                                                                                                                                                                                                                                                                                                                       |
| YMR010W        |                                                                                                                                                                                                                                                                                                                                                                                                                                                                                                                                                                                                             |
| YJR048W        | [CYC1] Cytochrome c, isoform 1; electron carrier of the mitochondrial intermembrane space that transfers electrons from ubiquinone-cytochrome c oxidoreductase to cytochrome c oxidase during cellular respiration iso-1-cytochrome c Cytochrome c deficiency                                                                                                                                                                                                                                                                                                                                               |
| YHR198C        | [YHR198C] The authentic, non-tagged protein was localized to the mitochondria                                                                                                                                                                                                                                                                                                                                                                                                                                                                                                                               |
| YNL334C        | [SNO2] Protein of unknown function, nearly identical to Sno3p; expression is induced before the diauxic shift and also in the absence of thiamin                                                                                                                                                                                                                                                                                                                                                                                                                                                            |
| YFL060C        | [SNO3] Protein of unknown function, nearly identical to Sno2p; expression is induced before the diauxic shift and also in the absence of thiamin                                                                                                                                                                                                                                                                                                                                                                                                                                                            |
| YMR322C        | [SNO4] Possible chaperone and cysteine protease with similarity to E. coli Hsp31 and S. cerevisiae Hsp31p, Hsp32p, and Hsp33p; member of the DJ-1/ThiJ/PfpI superfamily; may have a role in pyridoxine metabolism                                                                                                                                                                                                                                                                                                                                                                                           |
| YNL333W        | [SNZ2] Member of a stationary phase-induced gene family; transcription of SNZ2 is induced prior to diauxic shift, and also in the absence of thiamin in a Thi2p-dependent manner; forms a coregulated gene pair with SNO2; interacts with Thi1p hypersporulation                                                                                                                                                                                                                                                                                                                                            |
| YFL059W        | [SNZ3] Member of a stationary phase-induced gene family; transcription of SNZ2 is induced prior to diauxic shift, and also in the absence of thiamin in a Thi2p-dependent manner; forms a coregulated gene pair with SNO3 hypersporulation                                                                                                                                                                                                                                                                                                                                                                  |
| YMR095C        | [SNO1] Protein of unconfirmed function, involved in pyridoxine metabolism; expression is induced during stationary phase; forms a putative glutamine amidotransferase complex with Snz1p, with Sno1p serving as the glutaminase Null mutant is viable, sensitive to 6-azauracil and methylene blue.                                                                                                                                                                                                                                                                                                         |
| YMR096W        | [SNZ1] Protein involved in vitamin B6 biosynthesis; member of a stationary phase-induced gene family; coregulated with SNO1; interacts with Sno1p and with Yhr198p, perhaps as a multiprotein complex containing other Snz and Sno proteins highly conserved 35 kDa protein that shows increased expression after entry into stationary phase Null mutant is viable, sensitive to 6-azauracil and methylene blue.                                                                                                                                                                                           |

|                |                                                                                                                                                                                                                                                                                                                                                                                                                                 |
|----------------|---------------------------------------------------------------------------------------------------------------------------------------------------------------------------------------------------------------------------------------------------------------------------------------------------------------------------------------------------------------------------------------------------------------------------------|
| 0040           | GO_TERM:[ribonuclease MRP complex] P-Value:2.8e-27 OVERLAP:[RNase P] <440.14.10> SIZE:10                                                                                                                                                                                                                                                                                                                                        |
| YLR411W        | [CTR3] High-affinity copper transporter of the plasma membrane, acts as a trimer; gene is disrupted by a Ty2 transposon insertion in many laboratory strains of <i>S. cerevisiae</i> copper transporter Null mutant is viable, grows slower than w.t. under conditions of copper limitation on non-fermentable carbon source; strains with a deletion of both CTR1 and CTR3 are unable to grow on nonfermentable carbon sources |
| YJR115W        |                                                                                                                                                                                                                                                                                                                                                                                                                                 |
| YHR214W        |                                                                                                                                                                                                                                                                                                                                                                                                                                 |
| <b>YIR015W</b> | [RPR2] Subunit of nuclear RNase P, which cleaves tRNA precursors to generate mature 5' ends; not shared between Rnase MRP and Rnase P, in contrast to all other Rnase P protein subunits Nuclear RNase P subunit Null mutant is inviable; transient depletions cause loss of RNase P                                                                                                                                            |
| <b>YBL018C</b> | [POP8] Subunit of both RNase MRP, which cleaves pre-rRNA, and nuclear RNase P, which cleaves tRNA precursors to generate mature 5' ends Nuclear RNase P subunit RNase MRP subunit Null mutant is inviable; transient depletions cause loss of RNase P and RNase MRP function                                                                                                                                                    |
| <b>YNL282W</b> | [POP3] Subunit of both RNase MRP, which cleaves pre-rRNA, and nuclear RNase P, which cleaves tRNA precursors to generate mature 5' ends Nuclear RNase P subunit RNase MRP subunit                                                                                                                                                                                                                                               |
| <b>YBR167C</b> | [POP7] Subunit of both RNase MRP, which cleaves pre-rRNA, and nuclear RNase P, which cleaves tRNA precursors to generate mature 5' ends Nuclear RNase P subunit RNase MRP subunit Null mutant is inviable; transient depletions cause loss of RNase P and RNase MRP function                                                                                                                                                    |
| YDR478W        | [SNM1] Subunit of RNase MRP, which cleaves pre-rRNA; not shared between Rnase MRP and nuclear Rnase P, in contrast to all other Rnase MRP protein subunits; binds to the NME1 RNA subunit of Rnase MRP RNase MRP subunit                                                                                                                                                                                                        |
| <b>YNL221C</b> | [POP1] Subunit of both RNase MRP, which cleaves pre-rRNA, and nuclear RNase P, which cleaves tRNA precursors to generate mature 5' ends; binds to the RPR1 RNA subunit in Rnase P Nuclear RNase P subunit RNase MRP subunit Null mutant is inviable; temperature-sensitive mutant shows defect in processing pre-tRNAs and pre-rRNA at nonpermissive temperature                                                                |
| <b>YHR062C</b> | [RPP1] Subunit of both RNase MRP, which cleaves pre-rRNA, and nuclear RNase P, which cleaves tRNA precursors to generate mature 5' ends Nuclear RNase P subunit RNase MRP subunit                                                                                                                                                                                                                                               |
| YLR145W        | [RMP1] Protein required for cell viability, component of RNase MRP, which is involved in RNA processing in mitochondria Protein component of RNase MRP complex                                                                                                                                                                                                                                                                  |
| <b>YGR030C</b> | [POP6] Subunit of both RNase MRP, which cleaves pre-rRNA, and nuclear RNase P, which cleaves tRNA precursors to generate mature 5' ends Nuclear RNase P subunit RNase MRP subunit Null mutant is inviable; transient depletions cause loss of RNase P and RNase MRP function                                                                                                                                                    |
| <b>YAL033W</b> | [POP5] Subunit of both RNase MRP, which cleaves pre-rRNA, and nuclear RNase P, which cleaves tRNA precursors to generate mature 5' ends Nuclear RNase P subunit RNase MRP subunit Null mutant is inviable; transient depletion of Pop5p causes loss of RNase P and RNase MRP function                                                                                                                                           |
| <b>YBR257W</b> | [POP4] Subunit of both RNase MRP, which cleaves pre-rRNA, and nuclear RNase P, which cleaves tRNA precursors to generate mature 5' ends; binds to the RPR1 RNA subunit in Rnase P Nuclear RNase P subunit RNase MRP subunit                                                                                                                                                                                                     |
| 0041           | GO_TERM:[beta-alanine metabolism] P-Value:7.4e-06                                                                                                                                                                                                                                                                                                                                                                               |
| YLR143W        |                                                                                                                                                                                                                                                                                                                                                                                                                                 |
| YKL100C        |                                                                                                                                                                                                                                                                                                                                                                                                                                 |
| YMR169C        | [ALD3] Cytoplasmic aldehyde dehydrogenase, involved in beta-alanine synthesis; uses NAD <sup>+</sup> as the preferred coenzyme; very similar to Ald2p; expression is induced by stress and repressed by glucose aldehyde dehydrogenase                                                                                                                                                                                          |
| YMR170C        | [ALD2] Cytoplasmic aldehyde dehydrogenase, involved in ethanol oxidation and beta-alanine biosynthesis; uses NAD <sup>+</sup> as the preferred coenzyme; expression is stress induced and glucose repressed; very similar to Ald3p aldehyde dehydrogenase                                                                                                                                                                       |
| 0042           | GO_TERM:[calcium channel activity] P-Value:2.8e-06                                                                                                                                                                                                                                                                                                                                                                              |
| YHR132C        | [ECM14] Putative metalloprotease with similarity to the zinc carboxypeptidase family, required for normal cell wall assembly A Tn3 insertion into this gene causes hypersensitivity to the cell surface polymer perturbing agent calcofluor white.                                                                                                                                                                              |
| YGR217W        | [CCH1] Voltage-gated calcium channel involved in calcium influx in response to mating pheromones calcium channel (putative) Null mutant is viable; exhibits reduced growth rate, viability and calcium uptake; exhibits a defect in pheromone-induced Ca <sup>2+</sup> uptake; suppressor of <i>cdc1</i> temperature-sensitive mutant                                                                                           |
| YNL291C        | [MID1] N-glycosylated integral membrane protein of the ER membrane and plasma membrane, required for Ca <sup>2+</sup> influx stimulated by pheromone, functions as a stretch-activated Ca <sup>2+</sup> -permeable cation channel in mammals; forms an oligomer N-glycosylated integral plasma membrane protein Null mutant is viable; Ca <sup>2+</sup> influx and mating defective                                             |
| 0043           | GO_TERM:[oxidoreductase activity] P-Value:1.2e-01                                                                                                                                                                                                                                                                                                                                                                               |
| YIL044C        | [AGE2] ADP-ribosylation factor (ARF) GTPase activating protein (GAP) effector, involved in Trans-Golgi-Network (TGN) transport; contains C2C2H2 cysteine/histidine motif ARF GAP with effector function(s)                                                                                                                                                                                                                      |
| YDR531W        |                                                                                                                                                                                                                                                                                                                                                                                                                                 |
| YOR246C        |                                                                                                                                                                                                                                                                                                                                                                                                                                 |
| YOR222W        | [ODC2] Mitochondrial inner membrane transporter, exports 2-oxoadipate and 2-oxoglutarate from the mitochondrial matrix to the cytosol for use in lysine and glutamate biosynthesis and in lysine catabolism mitochondrial 2-oxodicarboxylate transport protein                                                                                                                                                                  |
| YDR512C        | [EMI1] Non-essential protein of unknown function required for transcriptional induction of the early meiotic-specific transcription factor IME1, also required for sporulation                                                                                                                                                                                                                                                  |

|         |                                                                                                                                                                                                                                                                                                                                                                                                                                                                                                                                                                                  |
|---------|----------------------------------------------------------------------------------------------------------------------------------------------------------------------------------------------------------------------------------------------------------------------------------------------------------------------------------------------------------------------------------------------------------------------------------------------------------------------------------------------------------------------------------------------------------------------------------|
| YBR241C |                                                                                                                                                                                                                                                                                                                                                                                                                                                                                                                                                                                  |
| YOR258W | [HNT3] Member of the third branch of the histidine triad (HIT) superfamily of nucleotide-binding proteins; similar to Aprataxin, a Hint related protein that is mutated in individuals with ataxia with oculomotor apraxia                                                                                                                                                                                                                                                                                                                                                       |
| YER081W | [SER3] 3-phosphoglycerate dehydrogenase, catalyzes the first step in serine and glycine biosynthesis; isozyme of Ser33p 3-phosphoglycerate dehydrogenase Null: enzyme activity of 3P-glycerate dehydrogenase is decreased in null mutant compared to wildtype and abolished in ser3 ser33 double deletion mutant                                                                                                                                                                                                                                                                 |
| YOR387C |                                                                                                                                                                                                                                                                                                                                                                                                                                                                                                                                                                                  |
| 0044    | GO_TERM:[alpha-glucosidase activity] P-Value:7.6e-05                                                                                                                                                                                                                                                                                                                                                                                                                                                                                                                             |
| YLR054C | [OSW2] Protein of unknown function proposed to be involved in the assembly of the spore wall                                                                                                                                                                                                                                                                                                                                                                                                                                                                                     |
| YBR013C |                                                                                                                                                                                                                                                                                                                                                                                                                                                                                                                                                                                  |
| YDL104C | [QRI7] Putative metalloprotease, similar to O-sialoglycoprotein metallopeptidase from P. haemolytica                                                                                                                                                                                                                                                                                                                                                                                                                                                                             |
| YBR299W | [MAL32] Maltase (alpha-D-glucosidase), inducible protein involved in maltose catabolism; encoded in the MAL3 complex locus; functional in genomic reference strain S288C maltase Defective maltose fermentation                                                                                                                                                                                                                                                                                                                                                                  |
| YGR292W | [MAL12] Maltase (alpha-D-glucosidase), inducible protein involved in maltose catabolism; encoded in the MAL1 complex locus maltase Defective maltose fermentation                                                                                                                                                                                                                                                                                                                                                                                                                |
| 0045    | GO_TERM:[nucleus] P-Value:6.9e-01                                                                                                                                                                                                                                                                                                                                                                                                                                                                                                                                                |
| YIL119C | [RPI1] Putative transcriptional regulator; overexpression suppresses the heat shock sensitivity of wild-type RAS2 overexpression and also suppresses the cell lysis defect of an mpk1 mutation ras inhibitor Null mutant is viable but shows heat-shock sensitivity                                                                                                                                                                                                                                                                                                              |
| YPR174C |                                                                                                                                                                                                                                                                                                                                                                                                                                                                                                                                                                                  |
| 0046    | GO_TERM:[transferase activity] P-Value:3.2e-01                                                                                                                                                                                                                                                                                                                                                                                                                                                                                                                                   |
| YGR121C | [MEP1] Ammonium permease; belongs to a ubiquitous family of cytoplasmic membrane proteins that transport only ammonium (NH4+); expression is under the nitrogen catabolite repression regulation ammonia permease                                                                                                                                                                                                                                                                                                                                                                |
| YOR321W | [PMT3] Protein O-mannosyltransferase, transfers mannose residues from dolichyl phosphate-D-mannose to protein serine/threonine residues; acts in a complex with Pmt5p, can instead interact with Pmt1p in some conditions; target for new antifungals dolichyl phosphate-D-mannose:protein O-D-mannosyltransferase Null mutant is viable; pmt2 pmt3 pmt4 triple mutant is inviable                                                                                                                                                                                               |
| YKL063C |                                                                                                                                                                                                                                                                                                                                                                                                                                                                                                                                                                                  |
| YDR120C | [TRM1] tRNA methyltransferase, localizes to both the nucleus and mitochondrion to produce the modified base N2,N2-dimethylguanosine in tRNAs in both compartments N2,N2-dimethylguanosine-specific tRNA methyltransferase An uncharacterized allele affects a specific base modification of both cytoplasmic and mitochondrial tRNA.                                                                                                                                                                                                                                             |
| YDL024C | [DIA3] Protein of unknown function, involved in invasive and pseudohyphal growth Null mutant is viable and causes invasive growth in haploids and pseudohyphal growth in diploids                                                                                                                                                                                                                                                                                                                                                                                                |
| YEL017W | [GTT3] Protein of unknown function with a possible role in glutathione metabolism, as suggested by computational analysis of large-scale protein-protein interaction data; GFP-fusion protein localizes to the nuclear periphery                                                                                                                                                                                                                                                                                                                                                 |
| 0047    | GO_TERM:[protein amino acid lipidation] P-Value:2.4e-03                                                                                                                                                                                                                                                                                                                                                                                                                                                                                                                          |
| YDR459C | [PFA5] Palmitoyltransferase with autoacylation activity; likely functions in pathway(s) outside Ras; member of a family of putative palmitoyltransferases containing an Asp-His-His-Cys-cysteine rich (DHHC-CRD) domain palmitoyltransferase                                                                                                                                                                                                                                                                                                                                     |
| YCR101C |                                                                                                                                                                                                                                                                                                                                                                                                                                                                                                                                                                                  |
| YGR216C | [GPI1] Membrane protein involved in the synthesis of N-acetylglucosaminyl phosphatidylinositol (GlcNAc-PI), the first intermediate in the synthesis of glycosylphosphatidylinositol (GPI) anchors; human and mouse GPI1p are functional homologs Null mutant is viable but is temperature-sensitive for growth, for [3H]inositol incorporation into protein, and for GPI anchor-dependent processing of the Gas1/Ggp1 protein and lacks in vitro N-acetylglucosaminylphosphatidylinositol synthetic activity Null mutant displays hyperactive Ras Signaling and invasive growth. |
| 0048    |                                                                                                                                                                                                                                                                                                                                                                                                                                                                                                                                                                                  |
| YJR152W | [DAL5] Allantoin permease; ureidosuccinate permease; expression is constitutive but sensitive to nitrogen catabolite repression allantoin permease Null mutant is viable, unable to transport allantoin or ureidosuccinate                                                                                                                                                                                                                                                                                                                                                       |
| YPR003C |                                                                                                                                                                                                                                                                                                                                                                                                                                                                                                                                                                                  |
| 0049    | GO_TERM:[vacuole fusion, non-autophagic] P-Value:2.9e-06                                                                                                                                                                                                                                                                                                                                                                                                                                                                                                                         |
| YJL012C | [VTC4] Vacuolar membrane protein involved in vacuolar polyphosphate accumulation; functions as a regulator of vacuolar H+-ATPase activity and vacuolar transporter chaperones; involved in non-autophagic vacuolar fusion polyphosphate synthetase (putative) Null mutant has been shown to be either inviable, or viable while exhibiting no polyphosphate accumulation                                                                                                                                                                                                         |

|         |                                                                                                                                                                                                                                                                                                                                                                                                                                                                             |
|---------|-----------------------------------------------------------------------------------------------------------------------------------------------------------------------------------------------------------------------------------------------------------------------------------------------------------------------------------------------------------------------------------------------------------------------------------------------------------------------------|
| YJR143C | [PMT4] Protein O-mannosyltransferase, transfers mannose residues from dolichyl phosphate-D-mannose to protein serine/threonine residues; appears to form homodimers in vivo and does not complex with other Pmt proteins; target for new antifungals dolichyl phosphate-D-mannose:protein O-D-mannosyltransferase Null mutant is viable but shows under glycosylation of chitinase; pmt2 pmt3 pmt4 triple mutant is inviable                                                |
| YER072W | [VTC1] Vacuolar transporter chaperon (VTC) involved in distributing V-ATPase and other membrane proteins; together with other VTC proteins, forms a heterotetrameric complex that associates with the SNARE Nyv1p and the V0 sector of the V-ATPase S. pombe Nrf1p homolog (97% identical in predicted amino acid sequence) Null mutant is viable, but exhibits both reduced V-ATPase in the vacuolar membrane and reduced H(+)-ATPase(Pma1p) in the plasma membrane        |
| YDL248W | [COS7] Protein of unknown function, member of the DUP380 subfamily of conserved, often subtelomerically-encoded proteins                                                                                                                                                                                                                                                                                                                                                    |
| YFL004W | [VTC2] Vacuolar membrane protein involved in vacuolar polyphosphate accumulation; functions as a regulator of vacuolar H+-ATPase activity and vacuolar transporter chaperones; involved in protein localization and non-autophagic vacuolar fusion polyphosphate synthetase (putative) Null mutant is viable; no polyphosphate accumulation in a vtc2(phm1)/vtc3(phm2) double disruptant                                                                                    |
| 0050    | GO_TERM:[fructose transporter activity] P-Value:5.4e-04                                                                                                                                                                                                                                                                                                                                                                                                                     |
| YDR345C | [HXT3] Low affinity glucose transporter of the major facilitator superfamily, expression is induced in low or high glucose conditions low affinity glucose transporter Null mutant is viable but grows slowly on galactose; some mutant alleles confer sodium hypersensitivity.                                                                                                                                                                                             |
| YHR094C | [HXT1] Low-affinity glucose transporter of the major facilitator superfamily, expression is induced by Hxk2p in the presence of glucose and repressed by Rgt1p when glucose is limiting hexose transporter                                                                                                                                                                                                                                                                  |
| YLL006W | [MMM1] Mitochondrial outer membrane protein required for normal mitochondrial morphology and mtDNA stability; involved in tethering mitochondria to the actin cytoskeleton and in anchoring mtDNA nucleoids mitochondrial outer membrane protein Null mutant is viable, fails to grow on nonfermentable carbon sources, demonstrates abnormal mitochondrial morphology, fails to segregate mitochondria into daughter cells                                                 |
| YJL066C | [MPM1] Mitochondrial membrane protein of unknown function, contains no hydrophobic stretches                                                                                                                                                                                                                                                                                                                                                                                |
| YAL010C | [MDM10] Subunit of the mitochondrial sorting and assembly machinery (SAM complex); has a role in assembly of the TOM complex, which mediates protein import through the outer membrane; required for normal mitochondrial morphology and inheritance mitochondrial outer membrane protein Null mutant has short actin cables. Point mutants exhibit giant, spherical mitochondria and are defective for mitochondrial inheritance.                                          |
| YOL009C | [MDM12] Mitochondrial outer membrane protein, required for transmission of mitochondria to daughter cells; exists in a complex with Mmm1p and Mdm10p Null mutant is viable, temperature sensitive, and possesses abnormally large, round mitochondria that are defective for inheritance by daughter buds                                                                                                                                                                   |
| 0051    | GO_TERM:[peroxisomal membrane] P-Value:3.3e-08                                                                                                                                                                                                                                                                                                                                                                                                                              |
| YBR168W | [PEX32] Peroxisomal integral membrane protein, involved in negative regulation of peroxisome size; partially functionally redundant with Pex31p; genetic interactions suggest action at a step downstream of steps mediated by Pex28p and Pex29p                                                                                                                                                                                                                            |
| YHR150W | [PEX28] Peroxisomal integral membrane protein, involved in regulation of peroxisome size and number; genetic interactions suggest that Pex28p and Pex29p act at steps upstream of those mediated by Pex30p, Pex31p, and Pex32p peroxin Peroxisomes of cells deleted for either or both of PEX28 and PEX29 are increased in number, exhibit extensive clustering, are smaller, and often exhibit membrane thickening between adjacent peroxisomes in a cluster.              |
| YGR026W |                                                                                                                                                                                                                                                                                                                                                                                                                                                                             |
| YDL089W |                                                                                                                                                                                                                                                                                                                                                                                                                                                                             |
| YGR004W | [PEX31] Peroxisomal integral membrane protein, involved in negative regulation of peroxisome size; partially functionally redundant with Pex30p and Pex32p; probably acts at a step downstream of steps mediated by Pex28p and Pex29p                                                                                                                                                                                                                                       |
| YLR324W | [PEX30] Peroxisomal integral membrane protein, involved in negative regulation of peroxisome number; partially functionally redundant with Pex31p; genetic interactions suggest action at a step downstream of steps mediated by Pex28p and Pex29p                                                                                                                                                                                                                          |
| 0052    | GO_TERM:[cation transport] P-Value:2.8e-02                                                                                                                                                                                                                                                                                                                                                                                                                                  |
| YBR199W | [KTR4] Putative mannosyltransferase involved in protein glycosylation; member of the KRE2/MNT1 mannosyltransferase family alpha-1,2-mannosyltransferase (putative)                                                                                                                                                                                                                                                                                                          |
| YDR384C | [ATO3] Plasma membrane protein, regulation pattern suggests a possible role in export of ammonia from the cell; member of the TC 9.B.33 YaaH family of putative transporters transmembrane protein Null: viable. Other phenotypes: defect in ammonia production in S.cerevisiae colonies                                                                                                                                                                                    |
| YNR060W | [FRE4] Ferric reductase, reduces a specific subset of siderophore-bound iron prior to uptake by transporters; expression induced by low iron levels                                                                                                                                                                                                                                                                                                                         |
| YPL222W | [YPL222W] The authentic, non-tagged protein was localized to the mitochondria.                                                                                                                                                                                                                                                                                                                                                                                              |
| YCL038C | [ATG22] Protein required for the breakdown of autophagic vesicles in the vacuole during autophagy, putative integral membrane protein that localizes to vacuolar membranes and punctate structures attached to the vacuole Null mutant is viable, but exhibits defects in lysis of autophagic vesicles after delivery to the vacuole; vesicles accumulate in the vacuole in the absence of PMSF; maturation of the vacuolar protein, aminopeptidase I is unaffected in aut4 |
| YMR009W | [ADI1] Acireductone dioxygenase involved in the methionine salvage pathway; ortholog of human MTCBP-1; transcribed with YMR010W and regulated post-transcriptionally by RNase III (Rnt1p) cleavage; ADI1 mRNA is induced in heat shock conditions Acireductone Dioxygenase                                                                                                                                                                                                  |
| 0053    | GO_TERM:[molecular_function] P-Value:3.7e-01                                                                                                                                                                                                                                                                                                                                                                                                                                |
| YLR301W |                                                                                                                                                                                                                                                                                                                                                                                                                                                                             |
| YIL127C |                                                                                                                                                                                                                                                                                                                                                                                                                                                                             |

|         |                                                                                                                                                                                                                                                                                                                                                                           |
|---------|---------------------------------------------------------------------------------------------------------------------------------------------------------------------------------------------------------------------------------------------------------------------------------------------------------------------------------------------------------------------------|
| YJR105W | [ADO1] Adenosine kinase, required for the utilization of S-adenosylmethionine (AdoMet); may be involved in recycling adenosine produced through the methyl cycle adenosine kinase                                                                                                                                                                                         |
| 0054    | GO_TERM:[ATPase activity, coupled] P-Value:2.4e-03                                                                                                                                                                                                                                                                                                                        |
| YOL095C | [HMI1] Mitochondrial inner membrane localized ATP-dependent DNA helicase, required for the maintenance of the mitochondrial genome; not required for mitochondrial transcription; has homology to E. coli helicase uvrD                                                                                                                                                   |
| YPL270W | [MDL2] Half-type ATP-binding cassette (ABC) transporter of the inner mitochondrial membrane                                                                                                                                                                                                                                                                               |
| 0055    | GO_TERM:[molecular_function] P-Value:5.5e-01                                                                                                                                                                                                                                                                                                                              |
| YBR250W |                                                                                                                                                                                                                                                                                                                                                                           |
| YNL012W | [SPO1] Meiosis-specific protein with similarity to phospholipase B, required for meiotic spindle pole body duplication and separation; required for spore formation similar to phospholipase B Null mutant is viable, arrests as mononucleate cells with unduplicated/unseparated spindle pole bodies                                                                     |
| YML038C | [YMD8] Putative nucleotide sugar transporter, has similarity to Vrg4p                                                                                                                                                                                                                                                                                                     |
| YNR066C |                                                                                                                                                                                                                                                                                                                                                                           |
| 0056    |                                                                                                                                                                                                                                                                                                                                                                           |
| YOR092W | [ECM3] Non-essential protein of unknown function A Tn3 insertion into this gene causes hypersensitivity to the cell surface polymer perturbing agent calcofluor white.                                                                                                                                                                                                    |
| YBL086C |                                                                                                                                                                                                                                                                                                                                                                           |
| YJR040W | [GEF1] Chloride channel localized to late- or post-Golgi vesicles, involved in iron metabolism; highly homologous to voltage-gated chloride channels in vertebrates transport protein involved in intracellular iron metabolism (putative)                                                                                                                                |
| 0057    | GO_TERM:[carboxylic acid transporter activity] P-Value:5.9e-04                                                                                                                                                                                                                                                                                                            |
| YCR010C | [ADY2] Acetate transporter required for normal sporulation transmembrane protein Null mutant is viable; forms predominantly asci containing 2 spores (dyads) when sporulated; required for long-term growth on YPD at 37 degrees C; defect in ammonia production in S.cerevisiae colonies                                                                                 |
| YFL055W | [AGP3] Low-affinity amino acid permease, may act to supply the cell with amino acids as nitrogen source in nitrogen-poor conditions; transcription is induced under conditions of sulfur limitation Null mutant is viable; loss of growth on some amino acids as nitrogen source (leu, thr) in a strain which has no Gap1p or Agp1p function                              |
| YBR029C | [CDS1] Phosphatidate cytidylyltransferase (CDP-diglyceride synthetase); an enzyme that catalyzes that conversion of CTP + phosphate into diphosphate + CDP-diaclycerol, a critical step in the synthesis of all major yeast phospholipids phosphatidate cytidylyltransferase                                                                                              |
| YCR061W |                                                                                                                                                                                                                                                                                                                                                                           |
| 0058    | GO_TERM:[membrane] P-Value:1.7e-03                                                                                                                                                                                                                                                                                                                                        |
| YCR098C | [GIT1] Plasma membrane permease, mediates uptake of glycerophosphoinositol and glycerophosphocholine as sources of the nutrients inositol and phosphate; expression and transport rate are regulated by phosphate and inositol availability permease involved in the uptake of glycerophosphoinositol (GroPIs) Null mutant is viable, exhibits decreased GroPIs transport |
| YPL265W | [DIP5] Dicarboxylic amino acid permease, mediates high-affinity and high-capacity transport of L-glutamate and L-aspartate; also a transporter for Gln, Asn, Ser, Ala, and Gly dicarboxylic amino acid permease Null mutant is viable, exhibits loss of L-aspartate and L-glutamate uptake                                                                                |
| YHR190W | [ERG9] Farnesyl-diphosphate farnesyl transferase (squalene synthase), joins two farnesyl pyrophosphate moieties to form squalene in the sterol biosynthesis pathway squalene synthetase                                                                                                                                                                                   |
| YNL008C | [ASI3] Putative integral membrane E3 ubiquitin ligase; genetic interactions suggest a role in negative regulation of amino acid uptake                                                                                                                                                                                                                                    |
| YNL083W | [SAL1] Probable transporter, member of the Ca <sup>2+</sup> -binding subfamily of the mitochondrial carrier family, with two EF-hand motifs; Pet9p and Sal1p have an overlapping function critical for viability; polymorphic in different S. cerevisiae strains                                                                                                          |
| 0059    | GO_TERM:[organelle part] P-Value:7.8e-01                                                                                                                                                                                                                                                                                                                                  |
| YMR051C |                                                                                                                                                                                                                                                                                                                                                                           |
| YPL253C | [VIK1] Protein that forms a complex with Kar3p at the spindle pole body, possible regulator of Kar3p function in microtubule-mediated processes; required for sister chromatid cohesion; has similarity to Cik1p Null mutant is viable and resistant to benomyl                                                                                                           |
| 0060    | GO_TERM:[sugar transporter activity] P-Value:6.5e-06                                                                                                                                                                                                                                                                                                                      |
| YBR291C | [CTP1] Mitochondrial inner membrane citrate transporter, member of the mitochondrial carrier family citrate transporter                                                                                                                                                                                                                                                   |

|         |                                                                                                                                                                                                                                                                                                                                                                                                                                                                                                                         |
|---------|-------------------------------------------------------------------------------------------------------------------------------------------------------------------------------------------------------------------------------------------------------------------------------------------------------------------------------------------------------------------------------------------------------------------------------------------------------------------------------------------------------------------------|
| YLL005C | [SPO75] Meiosis-specific protein of unknown function, required for spore wall formation during sporulation; dispensable for both nuclear divisions during meiosis Null: undergoes meiotic nuclear divisions but does not form spores                                                                                                                                                                                                                                                                                    |
| YDR483W | [KRE2] Alpha1,2-mannosyltransferase of the Golgi involved in protein mannosylation alpha-1,2-mannosyltransferase                                                                                                                                                                                                                                                                                                                                                                                                        |
| YHR096C | [HXT5] Hexose transporter with moderate affinity for glucose, may function in accumulation of reserve carbohydrates during stress, expression induced by a decrease in growth rate, contains an extended N-terminal domain relative to other HXTs hexose transporter                                                                                                                                                                                                                                                    |
| YDL245C | [HXT15] Protein of unknown function with similarity to hexose transporter family members, expression is induced by low levels of glucose and repressed by high levels of glucose hexose transporter                                                                                                                                                                                                                                                                                                                     |
| YJR160C | [MPH3] Alpha-glucoside permease, transports maltose, maltotriose, alpha-methylglucoside, and turanose; identical to Mph2p; encoded in a subtelomeric position in a region likely to have undergone duplication alpha-glucoside permease                                                                                                                                                                                                                                                                                 |
| 0061    | GO_TERM:[catalytic activity] P-Value:7.3e-02                                                                                                                                                                                                                                                                                                                                                                                                                                                                            |
| YFL025C | [BST1] GPI inositol deacylase of the ER that negatively regulates COPII vesicle formation, prevents production of vesicles with defective subunits, required for proper discrimination between resident ER proteins and Golgi-bound cargo molecules                                                                                                                                                                                                                                                                     |
| YMR307W | [GAS1] Beta-1.3-glucanosyltransferase, required for cell wall assembly; localizes to the cell surface via a glycosylphosphatidylinositol (GPI) anchor cell surface glycoprotein 115-120 kDa                                                                                                                                                                                                                                                                                                                             |
| 0062    | GO_TERM:[endoplasmic reticulum] P-Value:2.2e-01                                                                                                                                                                                                                                                                                                                                                                                                                                                                         |
| YGL148W | [ARO2] Bifunctional chorismate synthase and flavin reductase, catalyzes the conversion of 5-enolpyruvylshikimate 3-phosphate (EPSP) to form chorismate, which is a precursor to aromatic amino acids chorismate synthase aromatic amino acid requiring; lack of premeiotic DNA synthesis; blocked sporulation in homozygous mutant                                                                                                                                                                                      |
| YOL107W |                                                                                                                                                                                                                                                                                                                                                                                                                                                                                                                         |
| YLR065C |                                                                                                                                                                                                                                                                                                                                                                                                                                                                                                                         |
| YGL053W | [PRM8] Pheromone-regulated protein with 2 predicted transmembrane segments and an FF sequence, a motif involved in COPII binding; forms a complex with Prp9p in the ER; member of DUP240 gene family                                                                                                                                                                                                                                                                                                                    |
| YJL134W | [LCB3] Long-chain base-1-phosphate phosphatase, regulates ceramide and long-chain base phosphates levels, involved in incorporation of exogenous long chain bases in sphingolipids dihydrosphingosine-1-phosphate phosphatase Null mutant is viable, has reduced rate of exogenous long chain base incorporation into sphingolipids, increased resistance to growth inhibition by long chain bases                                                                                                                      |
| 0063    |                                                                                                                                                                                                                                                                                                                                                                                                                                                                                                                         |
| YEL072W | [RMD6] Protein required for sporulation                                                                                                                                                                                                                                                                                                                                                                                                                                                                                 |
| YOR273C | [TPO4] Polyamine transport protein, recognizes spermine, putrescine, and spermidine; localizes to the plasma membrane; member of the major facilitator superfamily                                                                                                                                                                                                                                                                                                                                                      |
| 0064    | GO_TERM:[integral to membrane] P-Value:1.2e-01                                                                                                                                                                                                                                                                                                                                                                                                                                                                          |
| YER113C |                                                                                                                                                                                                                                                                                                                                                                                                                                                                                                                         |
| YIL120W | [QDR1] Multidrug transporter required for resistance to quinidine, ketoconazole, fluconazole, and barban; member of the major facilitator superfamily of transporters conferring multiple drug resistance (MFS-MDR) multidrug resistance transporter                                                                                                                                                                                                                                                                    |
| YAL058W | [CNE1] Calnexin; integral membrane ER chaperone involved in folding and quality control of glycoproteins; chaperone activity is inhibited by Mpd1p, with which Cne1p interacts; 24% identical to mammalian calnexin; Ca <sup>+</sup> binding not yet shown in yeast calnexin and calreticulin homolog Null mutant is viable, increase of cell-surface expression of ste2-3p, increase in secretion of heterologously expressed mammalian alpha 1-antitrypsin. ~30% decrease in beta-1,6-glucan upon disruption of CNE1. |
| YOR236W | [DFR1] Dihydrofolate reductase, part of the dTTP biosynthetic pathway, involved in folate metabolism, possibly required for mitochondrial function dihydrofolate reductase                                                                                                                                                                                                                                                                                                                                              |
| 0065    | GO_TERM:[ion transporter activity] P-Value:8.4e-04                                                                                                                                                                                                                                                                                                                                                                                                                                                                      |
| YKR052C | [MRS4] Mitochondrial iron transporter of the mitochondrial carrier family (MCF), very similar to and functionally redundant with Mrs3p; functions under low-iron conditions; may transport other cations in addition to iron carrier protein Null mutant is viable, has no defects in mitochondrial function. Mrs4p overexpression causes a temperature sensitive petite phenotype in a wild-type background and can suppress the mitochondrial RNA splicing defects of mit- intron mutants                             |
| YNL275W | [YNL275W] Plasma membrane protein that binds HCO <sub>3</sub> <sup>-</sup> , I <sup>-</sup> , Br <sup>-</sup> , NO <sub>3</sub> <sup>-</sup> and Cl <sup>-</sup> ; putative boron efflux transporter with similarity to A. thaliana BOR1 which is a known boron efflux transporter boron efflux transporter                                                                                                                                                                                                             |
| 0066    |                                                                                                                                                                                                                                                                                                                                                                                                                                                                                                                         |
| YLR412W |                                                                                                                                                                                                                                                                                                                                                                                                                                                                                                                         |
| YOL031C | [SIL1] Nucleotide exchange factor for the endoplasmic reticulum (ER) luminal Hsp70 chaperone Kar2p, required for protein translocation into the ER; homolog of Yarrowia lipolytica SLS1; GrpE-like protein Nucleotide exchange factor                                                                                                                                                                                                                                                                                   |

|         |                                                                                                                                                                                                                                                                                                                                                                                                                                                                                                                                                                                                                                         |
|---------|-----------------------------------------------------------------------------------------------------------------------------------------------------------------------------------------------------------------------------------------------------------------------------------------------------------------------------------------------------------------------------------------------------------------------------------------------------------------------------------------------------------------------------------------------------------------------------------------------------------------------------------------|
| 0067    | GO_TERM:[cellular_component] P-Value:1.5e-01                                                                                                                                                                                                                                                                                                                                                                                                                                                                                                                                                                                            |
| YMR266W | [RSN1] Membrane protein of unknown function; overexpression suppresses NaCl sensitivity of sro7 mutant Null: viable in both high and low salinity                                                                                                                                                                                                                                                                                                                                                                                                                                                                                       |
| YDR435C | [PPM1] Carboxyl methyl transferase, methylates the C terminus of the protein phosphatase 2A catalytic subunit (Pph21p or Pph22p), which is important for complex formation with regulatory subunits carboxy methyl transferase for protein phosphatase 2A catalytic subunit Mutant is rapamycin resistant, benomyl supersensitive, and nocodazole sensitive.                                                                                                                                                                                                                                                                            |
| YFL040W |                                                                                                                                                                                                                                                                                                                                                                                                                                                                                                                                                                                                                                         |
| 0068    | GO_TERM:[membrane] P-Value:6.6e-02                                                                                                                                                                                                                                                                                                                                                                                                                                                                                                                                                                                                      |
| YHR048W |                                                                                                                                                                                                                                                                                                                                                                                                                                                                                                                                                                                                                                         |
| YNL192W | [CHS1] Chitin synthase I, requires activation from zymogenic form in order to catalyze the transfer of N-acetylglucosamine (GlcNAc) to chitin; required for repairing the chitin septum during cytokinesis; transcription activated by mating factor chitin synthase 1                                                                                                                                                                                                                                                                                                                                                                  |
| 0069    |                                                                                                                                                                                                                                                                                                                                                                                                                                                                                                                                                                                                                                         |
| YHL017W |                                                                                                                                                                                                                                                                                                                                                                                                                                                                                                                                                                                                                                         |
| YIL111W | [COX5B] Subunit Vb of cytochrome c oxidase, which is the terminal member of the mitochondrial inner membrane electron transport chain; predominantly expressed during anaerobic growth while its isoform Va (Cox5Ap) is expressed during aerobic growth cytochrome c oxidase subunit Vb                                                                                                                                                                                                                                                                                                                                                 |
| 0070    | GO_TERM:[membrane] P-Value:5.7e-03                                                                                                                                                                                                                                                                                                                                                                                                                                                                                                                                                                                                      |
| YPL053C | [KTR6] Probable mannosylphosphate transferase involved in the synthesis of core oligosaccharides in protein glycosylation pathway; member of the KRE2/MNT1 mannosyltransferase family mannosylphosphate transferase Null mutant is viable, hypersensitive to Calcofluor White and hygromycin B; shows less binding to Alcian blue, and diminished mannosylphosphate transferase activity toward the ER core oligosaccharide acceptors, displays a decrease in polymannose outer chain phosphorylation. mnn4, ktr6 mutations affect mannosylphosphorylation of O-linked oligosaccharide, together with that of N-linked oligosaccharide. |
| YDR284C | [DPP1] Diacylglycerol pyrophosphate (DGPP) phosphatase, zinc-regulated vacuolar membrane-associated lipid phosphatase, dephosphorylates DGPP to phosphatidate (PA) and Pi, then PA to diacylglycerol; involved in lipid signaling and cell metabolism diacylglycerol pyrophosphate phosphatase                                                                                                                                                                                                                                                                                                                                          |
| YKR088C | [TVP38] Integral membrane protein localized to late Golgi vesicles along with the v-SNARE Tlg2p; green fluorescent protein (GFP)-fusion protein localizes to the cytoplasm in a punctate pattern integral membrane protein Null: no notable phenotype                                                                                                                                                                                                                                                                                                                                                                                   |
| YCR011C | [ADP1] Putative ATP-dependent permease of the ABC transporter family of proteins                                                                                                                                                                                                                                                                                                                                                                                                                                                                                                                                                        |
| YKR093W | [PTR2] Integral membrane peptide transporter, mediates transport of di- and tri-peptides; conserved protein that contains 12 transmembrane domains; PTR2 expression is regulated by the N-end rule pathway via repression by Cup9p peptide transporter                                                                                                                                                                                                                                                                                                                                                                                  |
| YPL162C |                                                                                                                                                                                                                                                                                                                                                                                                                                                                                                                                                                                                                                         |
| YNL194C |                                                                                                                                                                                                                                                                                                                                                                                                                                                                                                                                                                                                                                         |
| YPR079W | [MRL1] Membrane protein with similarity to mammalian mannose-6-phosphate receptors, possibly functions as a sorting receptor in the delivery of vacuolar hydrolases                                                                                                                                                                                                                                                                                                                                                                                                                                                                     |
| 0071    | GO_TERM:[vacuolar transport] P-Value:9.3e-03                                                                                                                                                                                                                                                                                                                                                                                                                                                                                                                                                                                            |
| YJL222W | [VTH2] Putative membrane glycoprotein with strong similarity to Vth1p and Pep1p/Vps10p, may be involved in vacuolar protein sorting potential membrane glycoprotein strong similarity to Vth1 and Pep1 Null mutant is viable; overexpression of the nearly identical Vth1 partially suppresses the sorting defect of a pep1 null mutant strain.                                                                                                                                                                                                                                                                                         |
| YFL011W | [HXT10] Putative hexose transporter, expressed at low levels and expression is repressed by glucose high affinity hexose transporter                                                                                                                                                                                                                                                                                                                                                                                                                                                                                                    |
| YMR004W | [MVP1] Protein required for sorting proteins to the vacuole; overproduction of Mvp1p suppresses several dominant VPS1 mutations; Mvp1p and Vps1p act in concert to promote membrane traffic to the vacuole MVP1 was identified as a multicopy suppressor of dominant-negative vps1 mutations, as well as an extragenic suppressor of a temperature-sensitive pma1 mutation (sop gene)                                                                                                                                                                                                                                                   |
| 0072    | GO_TERM:[cellular_component] P-Value:5.8e-02                                                                                                                                                                                                                                                                                                                                                                                                                                                                                                                                                                                            |
| YBR285W |                                                                                                                                                                                                                                                                                                                                                                                                                                                                                                                                                                                                                                         |
| YIL049W | [DFG10] Protein of unknown function, involved in filamentous growth Null mutant is viable and defective in filamentous growth                                                                                                                                                                                                                                                                                                                                                                                                                                                                                                           |

|           |                                                                                                                                                                                                                                                                                                                                                                                                                                                                                   |
|-----------|-----------------------------------------------------------------------------------------------------------------------------------------------------------------------------------------------------------------------------------------------------------------------------------------------------------------------------------------------------------------------------------------------------------------------------------------------------------------------------------|
| 0073      | GO_TERM:[glycosylphosphatidylinositol-N-acetylglucosaminyltransferase (GPI-GnT) complex] P-Value:9.3e-06                                                                                                                                                                                                                                                                                                                                                                          |
| YPL096C-A | [ERI1] Endoplasmic reticulum membrane protein that binds to and inhibits GTP-bound Ras2p at the ER; component of the GPI-GnT complex which catalyzes the first step in GPI-anchor biosynthesis; probable homolog of mammalian PIG-Y protein                                                                                                                                                                                                                                       |
| YPL175W   | [SPT14] UDP-GlcNAc-binding and catalytic subunit of the enzyme that mediates the first step in glycosylphosphatidylinositol (GPI) biosynthesis, mutations cause defects in transcription and in biogenesis of cell wall proteins N-acetylglucosaminyl-phosphatidylinositol biosynthetic protein suppression of Ty transcription                                                                                                                                                   |
| 0074      | GO_TERM:[palmitoyltransferase complex] P-Value:8.5e-07                                                                                                                                                                                                                                                                                                                                                                                                                            |
| YLR246W   | [ERF2] Subunit of a palmitoyltransferase, composed of Erf2p and Shr5p, that adds a palmitoyl lipid moiety to Ras2p through a thioester linkage; mutants partially mislocalize Ras2p to the vacuole Null mutant is viable, but has a synthetic growth defect in the absence of RAS2; Deletion of ERF2 results in the reduction of steady-state levels of Ras2p palmitoylation.                                                                                                     |
| YOL110W   | [SHR5] Subunit of a palmitoyltransferase, composed of Shr5p and Erf2p, that adds a palmitoyl lipid moiety to Ras2p through a thioester linkage; palmitoylation is required for Ras2p localization to the plasma membrane Null mutant is viable; exhibits normal palmitoyltransferase activity in vitro and attenuates Ras function in cells with mutant Ras2 proteins that are not farnesylated or palmitoylated; shr5 mutation originally isolated as suppressor of Ras function |
| 0075      | GO_TERM:[catalytic activity] P-Value:1.8e-01                                                                                                                                                                                                                                                                                                                                                                                                                                      |
| YIL162W   | [SUC2] Invertase, sucrose hydrolyzing enzyme; a secreted, glycosylated form is regulated by glucose repression, and an intracellular, nonglycosylated enzyme is produced constitutively invertase (sucrose hydrolyzing enzyme) Null mutant is viable but cannot ferment sucrose                                                                                                                                                                                                   |
| YDR147W   | [EK11] Ethanolamine kinase, primarily responsible for phosphatidylethanolamine synthesis via the CDP-ethanolamine pathway; also exhibits choline kinase activity ethanolamine kinase                                                                                                                                                                                                                                                                                              |
| YHR087W   |                                                                                                                                                                                                                                                                                                                                                                                                                                                                                   |
| 0076      | GO_TERM:[protein metabolism] P-Value:2.6e-01                                                                                                                                                                                                                                                                                                                                                                                                                                      |
| YKL201C   | [MNN4] Putative positive regulator of mannosylphosphate transferase (Mnn6p), involved in mannosylphosphorylation of N-linked oligosaccharides; expression increases in late-logarithmic and stationary growth phases mannan synthesis defective. mnn4 and ktr6 mutations affect the mannosylphosphorylation of O-linked oligosaccharide, together with that of N-linked oligosaccharide.                                                                                          |
| YOR003W   | [YSP3] Putative precursor to the subtilisin-like protease III subtilisin-like protease III                                                                                                                                                                                                                                                                                                                                                                                        |
| 0077      | GO_TERM:[biological_process] P-Value:9.6e-02                                                                                                                                                                                                                                                                                                                                                                                                                                      |
| YDR387C   |                                                                                                                                                                                                                                                                                                                                                                                                                                                                                   |
| YOR292C   |                                                                                                                                                                                                                                                                                                                                                                                                                                                                                   |
| 0078      | GO_TERM:[hydrolase activity] P-Value:6.4e-02                                                                                                                                                                                                                                                                                                                                                                                                                                      |
| YGL254W   | [FZF1] Transcription factor involved in sulfite metabolism, sole identified regulatory target is SSU1, overexpression suppresses sulfite-sensitivity of many unrelated mutants due to hyperactivation of SSU1, contains five zinc fingers contains five zinc fingers transcription factor                                                                                                                                                                                         |
| YHR215W   | [PHO12] One of three repressible acid phosphatases, a glycoprotein that is transported to the cell surface by the secretory pathway; nearly identical to Pho11p; upregulated by phosphate starvation acid phosphatase                                                                                                                                                                                                                                                             |
| YLR088W   | [GAA1] Subunit of the GPI (glycosylphosphatidylinositol):protein transamidase complex, removes the GPI-anchoring signal and attaches GPI to proteins in the ER GPI:protein transamidase component (putative)                                                                                                                                                                                                                                                                      |
| 0079      | GO_TERM:[transporter activity] P-Value:3.2e-03                                                                                                                                                                                                                                                                                                                                                                                                                                    |
| YMR056C   | [AAC1] Mitochondrial inner membrane ADP/ATP translocator, exchanges cytosolic ADP for mitochondrially synthesized ATP; Aac1p is a minor isoform while Pet9p is the major ADP/ATP translocator ADP/ATP translocator Null mutant is viable, shows altered colony morphology                                                                                                                                                                                                         |
| YNR056C   | [BIO5] Putative transmembrane protein involved in the biotin biosynthesis pathway; responsible for uptake of 7-keto 8-aminopelargonic acid; BIO5 is in a cluster of 3 genes (BIO3, BIO4, and BIO5) that mediate biotin synthesis transmembrane regulator of KAPA/DAPA transport                                                                                                                                                                                                   |
| 0080      | GO_TERM:[amino acid transporter activity] P-Value:9.0e-05                                                                                                                                                                                                                                                                                                                                                                                                                         |
| YCL069W   | [VBA3] Permease of basic amino acids in the vacuolar membrane                                                                                                                                                                                                                                                                                                                                                                                                                     |
| YCR075C   | [ERS1] Protein with similarity to human cystinosin, which is a H(+)-driven transporter involved in L-cystine export from lysosomes and implicated in the disease cystinosis; contains seven transmembrane domains                                                                                                                                                                                                                                                                 |

|         |                                                                                                                                                                                                                                                                                                                                                                                                                                                                    |
|---------|--------------------------------------------------------------------------------------------------------------------------------------------------------------------------------------------------------------------------------------------------------------------------------------------------------------------------------------------------------------------------------------------------------------------------------------------------------------------|
| 0081    | GO_TERM:[transporter activity] P-Value:9.2e-03                                                                                                                                                                                                                                                                                                                                                                                                                     |
| YIL005W | [EPS1] Pdi1p (protein disulfide isomerase)-related protein involved in endoplasmic reticulum retention of resident ER proteins                                                                                                                                                                                                                                                                                                                                     |
| YIL166C |                                                                                                                                                                                                                                                                                                                                                                                                                                                                    |
| YKL217W | [JEN1] Lactate transporter, required for uptake of lactate and pyruvate; expression is derepressed by transcriptional activator Cat8p under nonfermentative growth conditions, and repressed in the presence of glucose, fructose, and mannose carboxylic acid transporter protein homolog deletion results in slow growth of yeast in synthetic medium supplemented with L-lactate and synergistic with cpr3 null mutation; essential for lactate uptake in yeast |
| 0082    |                                                                                                                                                                                                                                                                                                                                                                                                                                                                    |
| YER145C | [FTR1] High affinity iron permease involved in the transport of iron across the plasma membrane; forms complex with Fet3p; expression is regulated by iron iron permease Lacks high affinity iron uptake                                                                                                                                                                                                                                                           |
| YIL056W | [VHR1] Transcriptional activator, required for the vitamin H-responsive element (VHRE) mediated induction of VHT1 (Vitamin H transporter) and BIO5 (biotin biosynthesis intermediate transporter) in response to low biotin concentrations transcription factor                                                                                                                                                                                                    |
| 0083    | GO_TERM:[protein complex assembly] P-Value:3.0e-03                                                                                                                                                                                                                                                                                                                                                                                                                 |
| YGR174C | [CBP4] Mitochondrial protein required for assembly of ubiquinol cytochrome-c reductase complex (cytochrome bc1 complex); interacts with Cbp3p and function is partially redundant with that of Cbp3p Inability to respire, pleiotropic reduction in steady state levels of four subunits of ubiquinol-cytochrome c reductase                                                                                                                                       |
| YPL215W | [CBP3] Mitochondrial protein required for assembly of ubiquinol cytochrome-c reductase complex (cytochrome bc1 complex); interacts with Cbp4p and function is partially redundant with that of Cbp4p reduced levels of a subset of subunit polypeptides of the coenzyme QH2-cytochrome c reductase complex                                                                                                                                                         |
| 0084    |                                                                                                                                                                                                                                                                                                                                                                                                                                                                    |
| YCR028C | [FEN2] Plasma membrane H+-pantothenate symporter; confers sensitivity to the antifungal agent fenpropimorph Plasma Membrane H+-Pantothenate Symporter                                                                                                                                                                                                                                                                                                              |
| YLR174W | [IDP2] Cytosolic NADP-specific isocitrate dehydrogenase, catalyzes oxidation of isocitrate to alpha-ketoglutarate; levels are elevated during growth on non-fermentable carbon sources and reduced during growth on glucose NADP-dependent isocitrate dehydrogenase                                                                                                                                                                                                |
| YNR065C | [YNR065C] Sortilin homolog, interacts with proteins of the endocytic machinery                                                                                                                                                                                                                                                                                                                                                                                     |
| 0085    | GO_TERM:[transporter activity] P-Value:9.2e-03                                                                                                                                                                                                                                                                                                                                                                                                                     |
| YMR306W | [FKS3] Protein of unknown function, has similarity to 1,3-beta-D-glucan synthase catalytic subunits Fks1p and Gsc2p                                                                                                                                                                                                                                                                                                                                                |
| YGL114W |                                                                                                                                                                                                                                                                                                                                                                                                                                                                    |
| YPR128C | [ANT1] Peroxisomal adenine nucleotide transporter; involved in beta-oxidation of medium-chain fatty acid; required for peroxisome proliferation Null: growth defect on medium-chain length fatty acids.                                                                                                                                                                                                                                                            |
| 0086    | GO_TERM:[biological_process] P-Value:9.6e-02                                                                                                                                                                                                                                                                                                                                                                                                                       |
| YGL230C |                                                                                                                                                                                                                                                                                                                                                                                                                                                                    |
| YOR161C | [PNS1] Protein of unknown function; has similarity to Torpedo californica tCTL1p, which is postulated to be a choline transporter, neither null mutation nor overexpression affects choline transport                                                                                                                                                                                                                                                              |
| 0087    | GO_TERM:[transporter activity] P-Value:9.2e-03                                                                                                                                                                                                                                                                                                                                                                                                                     |
| YKL004W | [AUR1] Phosphatidylinositol:ceramide phosphoinositol transferase (IPC synthase), required for sphingolipid synthesis; can mutate to confer aureobasidin A resistance Null mutant is inviable; mutant exhibits dominant resistance to aureobasidin A. Wild type (sensitive) is recessive.                                                                                                                                                                           |
| YMR243C | [ZRC1] Vacuolar membrane zinc transporter, transports zinc from the cytosol into the vacuole for storage; also has a role in resistance to zinc shock resulting from a sudden influx of zinc into the cytoplasm Null mutant is viable and sensitive to zinc                                                                                                                                                                                                        |
| YNR072W | [HXT17] Protein of unknown function with similarity to hexose transporter family members, expression is repressed by high levels of glucose hexose transporter                                                                                                                                                                                                                                                                                                     |
| 0088    | GO_TERM:[basic amino acid transport] P-Value:4.9e-04                                                                                                                                                                                                                                                                                                                                                                                                               |
| YMR221C | [YMR221C] The authentic, non-tagged protein was localized to the mitochondria                                                                                                                                                                                                                                                                                                                                                                                      |

|         |                                                                                                                                                                                                                                                                                                                                                                                                           |
|---------|-----------------------------------------------------------------------------------------------------------------------------------------------------------------------------------------------------------------------------------------------------------------------------------------------------------------------------------------------------------------------------------------------------------|
| YOR079C | [ATX2] Golgi membrane protein involved in manganese homeostasis; overproduction suppresses the sod1 (copper, zinc superoxide dismutase) null mutation manganese-trafficking protein Null mutant is viable but has reduced levels of intracellular manganese.                                                                                                                                              |
| YOR071C |                                                                                                                                                                                                                                                                                                                                                                                                           |
| YJL059W | [YHC3] Vacuolar membrane protein involved in the ATP-dependent transport of arginine into the vacuole and possibly in balancing ion homeostasis; homolog of human CLN3 involved in Batten disease (juvenile onset neuronal ceroid lipofuscinosis) Null mutant is viable. btn1delta suppresses both the canavanine sensitivity and the elevated rate of uptake of arginine displayed by btn2delta strains. |
| YLR283W |                                                                                                                                                                                                                                                                                                                                                                                                           |
| YFL062W | [COS4] Protein of unknown function, member of the DUP380 subfamily of conserved, often subtelomerically-encoded proteins                                                                                                                                                                                                                                                                                  |
| YGR191W | [HIP1] High-affinity histidine permease, also involved in the transport of manganese ions histidine permease requires supplementation with large amounts of histidine for growth                                                                                                                                                                                                                          |
| 0089    |                                                                                                                                                                                                                                                                                                                                                                                                           |
| YDR068W | [DOS2] Protein of unknown function, green fluorescent protein (GFP)-fusion protein localizes to the cytoplasm                                                                                                                                                                                                                                                                                             |
| YLR237W | [THI7] Plasma membrane transporter responsible for the uptake of thiamine, member of the major facilitator superfamily of transporters; mutation of human ortholog causes thiamine-responsive megaloblastic anemia thiamine transporter Null mutant is viable, thi7 mutants are pyrithiamine resistant and cordycepin resistant                                                                           |
| 0090    | GO_TERM:[monovalent inorganic cation homeostasis] P-Value:1.3e-03                                                                                                                                                                                                                                                                                                                                         |
| YKR050W | [TRK2] Component of the Trk1p-Trk2p potassium transport system low affinity potassium transport membrane protein Null mutant is viable, requires added potassium; trk1 trk2 double mutants are viable                                                                                                                                                                                                     |
| YML002W |                                                                                                                                                                                                                                                                                                                                                                                                           |
| YDR456W | [NHX1] Endosomal Na <sup>+</sup> /H <sup>+</sup> exchanger, required for intracellular sequestration of Na <sup>+</sup> ; required for osmotolerance to acute hypertonic shock Na <sup>+</sup> /H <sup>+</sup> exchanger                                                                                                                                                                                  |
| YIL171W |                                                                                                                                                                                                                                                                                                                                                                                                           |
| 0091    |                                                                                                                                                                                                                                                                                                                                                                                                           |
| YBR296C | [PHO89] Na <sup>+</sup> /Pi cotransporter, active in early growth phase; similar to phosphate transporters of Neurospora crassa; transcription regulated by inorganic phosphate concentrations and Pho4p Na <sup>+</sup> /Pi symporter (putative)                                                                                                                                                         |
| YLR137W |                                                                                                                                                                                                                                                                                                                                                                                                           |
| 0092    | GO_TERM:[cellular_component] P-Value:1.5e-01                                                                                                                                                                                                                                                                                                                                                              |
| YKL219W | [COS9] Protein of unknown function, member of the DUP380 subfamily of conserved, often subtelomerically-encoded proteins                                                                                                                                                                                                                                                                                  |
| YJL163C |                                                                                                                                                                                                                                                                                                                                                                                                           |
| YLL061W | [MMP1] High-affinity S-methylmethionine permease, required for utilization of S-methylmethionine as a sulfur source; has similarity to S-adenosylmethionine permease Sam3p high affinity S-methylmethionine permease Null mutant is viable but is unable to use S-methylmethionine as a sulfur source                                                                                                     |
| 0093    | GO_TERM:[membrane] P-Value:6.6e-02                                                                                                                                                                                                                                                                                                                                                                        |
| YLR066W | [SPC3] Subunit of signal peptidase complex (Spc1p, Spc2p, Spc3p, Sec11p), which catalyzes cleavage of N-terminal signal sequences of proteins targeted to the secretory pathway; homologous to mammalian SPC22/23                                                                                                                                                                                         |
| YOL020W | [TAT2] High affinity tryptophan and tyrosine permease, overexpression confers FK506 resistance tryptophan permease, high affinity suppressor of chromosome segregation mutation                                                                                                                                                                                                                           |
| 0094    | GO_TERM:[cytoplasmic part] P-Value:7.9e-01                                                                                                                                                                                                                                                                                                                                                                |
| YHR050W | [SMF2] Divalent metal ion transporter involved in manganese homeostasis; has broad specificity for di-valent and tri-valent metals; post-translationally regulated by levels of metal ions; member of the Nramp family of metal transport proteins Null mutant is viable, shows double mutant sickness with smf1 null                                                                                     |
| YKR089C | [TGL4] Triacylglycerol lipase involved in triacylglycerol mobilization and degradation; found in lipid particles; potential Cdc28p substrate triacylglycerol lipase                                                                                                                                                                                                                                       |
| 0095    | GO_TERM:[biological_process] P-Value:9.6e-02                                                                                                                                                                                                                                                                                                                                                              |
| YBR230C | [OM14] Integral mitochondrial outer membrane protein; abundance is decreased in cells grown in glucose relative to other carbon sources; appears to contain 3 alpha-helical transmembrane segments; ORF encodes a 97-basepair intron major outer membrane protein of yeast mitochondria                                                                                                                   |
| YDR506C |                                                                                                                                                                                                                                                                                                                                                                                                           |

|                |                                                                                                                                                                                                                                                                                                                                                                                                                                            |
|----------------|--------------------------------------------------------------------------------------------------------------------------------------------------------------------------------------------------------------------------------------------------------------------------------------------------------------------------------------------------------------------------------------------------------------------------------------------|
| 0096           | GO_TERM:[transporter activity] P-Value:9.2e-03                                                                                                                                                                                                                                                                                                                                                                                             |
| YIL013C        | [PDR11] Membrane protein of the ATP-binding cassette (ABC) transporter superfamily, involved in multiple drug resistance, mediates sterol uptake when sterol biosynthesis is compromised, regulated by Pdr1p, required for anaerobic growth ABC transporter (putative)                                                                                                                                                                     |
| YLR083C        | [EMP70] Protein whose 24kDa cleavage product is found in endosome-enriched membrane fractions, predicted to be a transmembrane protein                                                                                                                                                                                                                                                                                                     |
| YMR177W        | [MMT1] Putative metal transporter involved in mitochondrial iron accumulation; closely related to Mmt2p mitochondrial metal transporter (putative) Null mutant is viable, mmt1 mmt2 double deletion mutants exhibit a growth defect on low iron medium                                                                                                                                                                                     |
| 0097           | GO_TERM:[proteolysis] P-Value:6.7e-02 OVERLAP:[Sec62-63 complex] <520.10.20> SIZE:4                                                                                                                                                                                                                                                                                                                                                        |
| YJR131W        | [MNS1] Alpha-1,2-mannosidase involved in ER quality control; catalyzes the removal of one mannose residue from Man9GlcNAc to produce a single isomer of Man8GlcNAc in N-linked oligosaccharide biosynthesis; integral to ER membrane alpha-mannosidase                                                                                                                                                                                     |
| YCL057W        | [PRD1] Zinc metalloendopeptidase, found in the cytoplasm and intermembrane space of mitochondria; with Cym1p, involved in degradation of mitochondrial proteins and of presequence peptides cleaved from imported proteins Null mutant is viable but exhibits a decrease in the intracellular degradation of peptides                                                                                                                      |
| <b>YBR171W</b> | [SEC66] Non-essential subunit of Sec63 complex (Sec63p, Sec62p, Sec66p and Sec72p); with Sec61 complex, Kar2p/BiP and Lhs1p forms a channel competent for SRP-dependent and post-translational SRP-independent protein targeting and import into the ER glycoprotein complexed with Sec62p and Sec63p in the Sec63 complex, an integral endoplasmic reticulum membrane protein complex required for translocation of presecretory proteins |
| YCL001W        | [RER1] Protein involved in retention of membrane proteins, including Sec12p, in the ER; localized to Golgi; functions as a retrieval receptor in returning membrane proteins to the ER Null mutant is viable and shows mislocalization of transmembrane proteins that are normally retained in the early secretory compartments                                                                                                            |
| 0098           | GO_TERM:[transporter activity] P-Value:3.2e-03                                                                                                                                                                                                                                                                                                                                                                                             |
| YBL089W        | [AVT5] Putative transporter, member of a family of seven <i>S. cerevisiae</i> genes (AVT1-7) related to vesicular GABA-glycine transporters transporter                                                                                                                                                                                                                                                                                    |
| YBR068C        | [BAP2] High-affinity leucine permease, functions as a branched-chain amino acid permease involved in the uptake of leucine, isoleucine and valine; contains 12 predicted transmembrane domains reduced uptake of leucine, isoleucine, and valine                                                                                                                                                                                           |
| 0099           | GO_TERM:[endoplasmic reticulum] P-Value:2.5e-02                                                                                                                                                                                                                                                                                                                                                                                            |
| YDL093W        | [PMT5] Protein O-mannosyltransferase, transfers mannose residues from dolichyl phosphate-D-mannose to protein serine/threonine residues; acts in a complex with Pmt3p, can instead interact with Pmt2p in some conditions; target for new antifungals dolichyl phosphate-D-mannose:protein O-D-mannosyltransferase                                                                                                                         |
| YGL055W        | [OLE1] Fatty acid desaturase, required for monounsaturated fatty acid synthesis and for normal distribution of mitochondria delta-9-fatty acid desaturase The null mutant is inviable but can be rescued by addition of unsaturated fatty acids to the growth medium. Some alleles are temperature-sensitive for growth and show defective intracellular mitochondrial movement at the non-permissive temperature.                         |
| 0100           | GO_TERM:[ion transporter activity] P-Value:8.4e-04                                                                                                                                                                                                                                                                                                                                                                                         |
| YDR039C        | [ENA2] P-type ATPase sodium pump, involved in Na <sup>+</sup> efflux to allow salt tolerance; likely not involved in Li <sup>+</sup> efflux P-type ATPase Na <sup>+</sup> pump/plasma membrane ATPase/plasma membrane protein Null mutant is viable and sensitive to Na <sup>+</sup> , Li <sup>+</sup> , and alkaline pH                                                                                                                   |
| YPR201W        | [ARR3] Arsenite transporter of the plasma membrane, required for resistance to arsenic compounds; transcription is activated by Arr1p in the presence of arsenite Overexpression confers arsenite but not arsenate resistance                                                                                                                                                                                                              |
| 0101           |                                                                                                                                                                                                                                                                                                                                                                                                                                            |
| YJL219W        | [HXT9] Putative hexose transporter that is nearly identical to Hxt11p, has similarity to major facilitator superfamily (MFS) transporters, expression of HXT9 is regulated by transcription factors Pdr1p and Pdr3p hexose permease Null mutant is viable, cycloheximide, sulfomethuron methyl, and 4-NQO (4-nitroquinoline-N-oxide) resistant                                                                                             |
| YJR161C        | [COS5] Protein of unknown function, member the DUP380 subfamily of conserved, often subtelomerically-encoded proteins                                                                                                                                                                                                                                                                                                                      |
| 0102           | GO_TERM:[mitochondrion] P-Value:2.4e-01                                                                                                                                                                                                                                                                                                                                                                                                    |
| YKL212W        | [SAC1] Lipid phosphoinositide phosphatase of the ER and Golgi, involved in protein trafficking and secretion phosphoinositide phosphatase suppressor of actin mutations, suppressor of sec14 alleles, inositol auxotrophy                                                                                                                                                                                                                  |
| YPL099C        | [YPL099C] The authentic, non-tagged protein was localized to the mitochondria                                                                                                                                                                                                                                                                                                                                                              |
| 0103           | GO_TERM:[transferase activity] P-Value:5.1e-02                                                                                                                                                                                                                                                                                                                                                                                             |
| YNL336W        | [COS1] Protein of unknown function, member of the DUP380 subfamily of conserved, often subtelomerically-encoded proteins                                                                                                                                                                                                                                                                                                                   |

|                         |                                                                                                                                                                                                                                                                                                                                                                                                                                                           |
|-------------------------|-----------------------------------------------------------------------------------------------------------------------------------------------------------------------------------------------------------------------------------------------------------------------------------------------------------------------------------------------------------------------------------------------------------------------------------------------------------|
| YNL130C                 | [CPT1] Cholinephosphotransferase, required for phosphatidylcholine biosynthesis and for inositol-dependent regulation of EPT1 transcription sn-1,2-diacylglycerol cholinephosphotransferase Null mutant is viable, cpt1 ept1 double deletion mutants are viable                                                                                                                                                                                           |
| YOR067C                 | [ALG8] Glucosyl transferase, involved in N-linked glycosylation; adds glucose to the dolichol-linked oligosaccharide precursor prior to transfer to protein during lipid-linked oligosaccharide biosynthesis; similar to Alg6p glucosyl transferase                                                                                                                                                                                                       |
| 0104                    | GO_TERM:[transporter activity] P-Value:3.2e-03                                                                                                                                                                                                                                                                                                                                                                                                            |
| YAL022C                 | [FUN26] Nucleoside transporter with broad nucleoside selectivity; localized to intracellular membranes                                                                                                                                                                                                                                                                                                                                                    |
| YDR497C                 | [ITR1] Myo-inositol transporter with strong similarity to the minor myo-inositol transporter Itr2p, member of the sugar transporter superfamily; expression is repressed by inositol and choline via Opi1p and derepressed via Ino2p and Ino4p myo-inositol transporter                                                                                                                                                                                   |
| 0105                    | GO_TERM:[Golgi apparatus] P-Value:6.4e-03                                                                                                                                                                                                                                                                                                                                                                                                                 |
| YAR033W                 | [MST28] Putative integral membrane protein, involved in vesicle formation; forms complex with Mst27p; member of DUP240 gene family; binds COPI and COPII vesicles                                                                                                                                                                                                                                                                                         |
| YKL174C                 | [TPO5] Protein involved in excretion of putrescine and spermidine; putative polyamine transporter in the Golgi or post-Golgi vesicles                                                                                                                                                                                                                                                                                                                     |
| 0106                    | GO_TERM:[molecular_function] P-Value:1.7e-01                                                                                                                                                                                                                                                                                                                                                                                                              |
| YFR018C                 |                                                                                                                                                                                                                                                                                                                                                                                                                                                           |
| YGR105W                 | [VMA21] Integral membrane protein that is required for vacuolar H <sup>+</sup> -ATPase (V-ATPase) function, although not an actual component of the V-ATPase complex; functions in the assembly of the V-ATPase; localized to the yeast endoplasmic reticulum (ER) Null mutant is viable but grows slowly and exhibits increased calcium sensitivity. Null mutants also cannot grow on glycerol or at pH 7.5                                              |
| 0107                    | GO_TERM:[membrane] P-Value:6.6e-02                                                                                                                                                                                                                                                                                                                                                                                                                        |
| YDL210W                 | [UGA4] Permease that serves as a gamma-aminobutyrate (GABA) transport protein involved in the utilization of GABA as a nitrogen source; catalyzes the transport of putrescine and delta-aminolevulinic acid (ALA); localized to the vacuolar membrane GABA-specific transport protein                                                                                                                                                                     |
| YNL279W                 | [PRM1] Pheromone-regulated multispinning membrane protein involved in membrane fusion during mating; predicted to have 5 transmembrane segments and a coiled coil domain; localizes to the shmoo tip; regulated by Ste12p Null mutant is viable but exhibits a mating defect.                                                                                                                                                                             |
| 0108                    | GO_TERM:[Sec62/Sec63 complex] P-Value:5.8e-06 OVERLAP:[Sec62-63 complex] <520.10.20> SIZE:4                                                                                                                                                                                                                                                                                                                                                               |
| <a href="#">YLR292C</a> | [SEC72] Non-essential subunit of Sec63 complex (Sec63p, Sec62p, Sec66p and Sec72p); with Sec61 complex, Kar2p/BiP and Lhs1p forms a channel competent for SRP-dependent and post-translational SRP-independent protein targeting and import into the ER                                                                                                                                                                                                   |
| <a href="#">YPL094C</a> | [SEC62] Essential subunit of Sec63 complex (Sec63p, Sec62p, Sec66p and Sec72p); with Sec61 complex, Kar2p/BiP and Lhs1p forms a channel competent for SRP-dependent and post-translational SRP-independent protein targeting and import into the ER ER protein translocation apparatus membrane component secretion deficient                                                                                                                             |
| 0109                    |                                                                                                                                                                                                                                                                                                                                                                                                                                                           |
| YDR508C                 | [GNP1] High-affinity glutamine permease, also transports Leu, Ser, Thr, Cys, Met and Asn; expression is fully dependent on Grr1p and modulated by the Ssy1p-Ptr3p-Ssy5p (SPS) sensor of extracellular amino acids high affinity glutamine permease Null mutant is viable but shows reduced glutamine transport and is therefore resistant to the glutamine analog L-glutamic acid gamma-monohydroxamate; overexpression induces sensitivity to heat shock |
| YMR279C                 |                                                                                                                                                                                                                                                                                                                                                                                                                                                           |
| 0110                    | GO_TERM:[Golgi apparatus part] P-Value:4.6e-03                                                                                                                                                                                                                                                                                                                                                                                                            |
| YER005W                 | [YND1] Apyrase with wide substrate specificity, involved in preventing the inhibition of glycosylation by hydrolyzing nucleoside tri- and diphosphates which are inhibitors of glycotransferases; partially redundant with Gda1p apyrase (NDPase/NTase) Null mutant is viable but vanadate-resistant and hygromycin-sensitive. The double mutant ynd1 gda1 exhibits slow growth and substantial defects in protein glycosylation and cell morphology.     |
| YJL004C                 | [SYS1] Integral membrane protein of the Golgi required for targeting of the Arf-like GTPase Arl3p to the Golgi; multicopy suppressor of ypt6 null mutation Null mutant is viable. sys1 ypt6 double mutant displays enhanced defects in vacuolar sorting and cell growth                                                                                                                                                                                   |
| 0111                    | GO_TERM:[endoplasmic reticulum] P-Value:4.7e-45 OVERLAP:[Oligosaccharyltransferase] <520.20> SIZE:9                                                                                                                                                                                                                                                                                                                                                       |
| YJR015W                 |                                                                                                                                                                                                                                                                                                                                                                                                                                                           |

|           |                                                                                                                                                                                                                                                                                                                                                                                                                                                                                                                                                                                                                                              |
|-----------|----------------------------------------------------------------------------------------------------------------------------------------------------------------------------------------------------------------------------------------------------------------------------------------------------------------------------------------------------------------------------------------------------------------------------------------------------------------------------------------------------------------------------------------------------------------------------------------------------------------------------------------------|
| YER019C-A | [SBH2] Ssh1p-Sss1p-Sbh2p complex component, involved in protein translocation into the endoplasmic reticulum; homologous to Sbh1p Sbh1p homolog Null mutant is viable. sbh1 sbh2 double deletion mutants exhibit synthetic temperature sensitivity and accumulation of secretory protein precursors                                                                                                                                                                                                                                                                                                                                          |
| YDR086C   | [SSS1] Subunit of the Sec61p translocation complex (Sec61p-Sss1p-Sbh1p) that forms a channel for passage of secretory proteins through the endoplasmic reticulum membrane, and of the Ssh1p complex (Ssh1p-Sbh2p-Sss1p); interacts with Ost4p and Wbp1p ER protein Sec61 trimeric complex component Ssh1 trimeric complex component Null mutant is inviable. Depletion of the Sss1 protein rapidly results in accumulation of multiple secretory or membrane proteins devoid of post-translational modifications. SSS1 overexpression restores translocation in sec61 mutants.                                                               |
| YGL226C-A | [OST5] Zeta subunit of the oligosaccharyltransferase complex of the ER lumen, which catalyzes asparagine-linked glycosylation of newly synthesized proteins oligosaccharyltransferase complex 9.5 kDa zeta subunit                                                                                                                                                                                                                                                                                                                                                                                                                           |
| YMR149W   | [SWP1] Delta subunit of the oligosaccharyl transferase glycoprotein complex, which is required for N-linked glycosylation of proteins in the endoplasmic reticulum oligosaccharyl transferase glycoprotein complex, delta subunit lethal                                                                                                                                                                                                                                                                                                                                                                                                     |
| YEL002C   | [WBP1] Beta subunit of the oligosaccharyl transferase (OST) glycoprotein complex; required for N-linked glycosylation of proteins in the endoplasmic reticulum oligosaccharyl transferase glycoprotein complex, beta subunit lethal                                                                                                                                                                                                                                                                                                                                                                                                          |
| YJL002C   | [OST1] Alpha subunit of the oligosaccharyltransferase complex of the ER lumen, which catalyzes asparagine-linked glycosylation of newly synthesized proteins 64 kDa, alpha subunit of oligosaccharyltransferase complex; homologous to mammalian ribophorin I Null mutant is inviable; temperature-sensitive mutants show pleiotropic underglycosylation of soluble and membrane-bound glycoproteins                                                                                                                                                                                                                                         |
| YLR378C   | [SEC61] Essential subunit of Sec61 complex (Sec61p, Sbh1p, and Sss1p); forms a channel for SRP-dependent protein import and retrograde transport of misfolded proteins out of the ER; with Sec63 complex allows SRP-independent protein import into ER                                                                                                                                                                                                                                                                                                                                                                                       |
| YDL232W   | [OST4] Subunit of the oligosaccharyltransferase complex of the ER lumen, which catalyzes protein asparagine-linked glycosylation; type I membrane protein required for incorporation of Ost3p or Ost6p into the OST complex 3.6 kDa protein Null mutant is viable but is cold- and heat-sensitive; vanadate-resistant, hygromycin B-sensitive; defective in oligosaccharyltransferase activity in vivo and in vitro                                                                                                                                                                                                                          |
| YER087C-B | [SBH1] Beta subunit of the Sec61p ER translocation complex (Sec61p-Sss1p-Sbh1p); involved in protein translocation into the endoplasmic reticulum; interacts with the exocyst complex; homologous to Sbh2p Sbh2p homolog Null mutant is viable. sbh1 sbh2 double deletion mutants exhibit synthetic temperature sensitivity and accumulation of secretory protein precursors                                                                                                                                                                                                                                                                 |
| YOR085W   | [OST3] Gamma subunit of the oligosaccharyltransferase complex of the ER lumen, which catalyzes asparagine-linked glycosylation of newly synthesized proteins; Ost3p is important for N-glycosylation of a subset of proteins oligosaccharyl transferase glycoprotein complex 34 kDa gamma subunit Null mutant is viable but shows underglycosylation of soluble and membrane-bound glycoproteins and contains less oligosaccharyltransferase activity in vitro                                                                                                                                                                               |
| YGL022W   | [STT3] Subunit of the oligosaccharyltransferase complex of the ER lumen, which catalyzes asparagine-linked glycosylation of newly synthesized proteins; forms a subcomplex with Ost3p and Ost4p and is directly involved in catalysis integral ER membrane protein oligosaccharyltransferase complex subunit (putative) Null mutant is inviable. sst3 mutants are defective in protein glycosylation, sensitive to hygromycin B, and resistant to sodium orthovanadate. Depletion of the STT3 protein results in loss of oligosaccharyl transferase activity in vivo and a deficiency in the assembly of oligosaccharyl transferase complex. |
| YML019W   | [OST6] Subunit of the oligosaccharyltransferase complex of the ER lumen, which catalyzes asparagine-linked glycosylation of newly synthesized proteins; similar to and partially functionally redundant with Ost3p N-oligosaccharyltransferase complex 37kDa subunit (putative)                                                                                                                                                                                                                                                                                                                                                              |
| YOR103C   | [OST2] Epsilon subunit of the oligosaccharyltransferase complex of the ER lumen, which catalyzes asparagine-linked glycosylation of newly synthesized proteins 40% identical to vertebrate DAD1 protein oligosaccharyltransferase complex 16 kDa epsilon subunit Null mutant is inviable; overexpression of OST2 suppresses temperature-sensitivity of wbp1-2 mutant; conditional mutants show pleiotropic underglycosylation of soluble and membrane-bound glycoproteins                                                                                                                                                                    |
| YNL125C   | [ESBP6] Protein with similarity to monocarboxylate permeases, appears not to be involved in transport of monocarboxylates such as lactate, pyruvate or acetate across the plasma membrane monocarboxylate permease (putative)                                                                                                                                                                                                                                                                                                                                                                                                                |
| YGL012W   | [ERG4] C-24(28) sterol reductase, catalyzes the final step in ergosterol biosynthesis; mutants are viable, but lack ergosterol sterol C-24 reductase                                                                                                                                                                                                                                                                                                                                                                                                                                                                                         |
| YPL087W   | [YDC1] Alkaline dihydroceramidase, involved in sphingolipid metabolism; preferentially hydrolyzes dihydroceramide to a free fatty acid and dihydrosphingosine; has a minor reverse activity alkaline dihydroceramidase with minor reverse activity                                                                                                                                                                                                                                                                                                                                                                                           |
| YDL018C   | [ERP3] Protein with similarity to Emp24p and Erv25p, member of the p24 family involved in ER to Golgi transport p24 protein involved in membrane trafficking                                                                                                                                                                                                                                                                                                                                                                                                                                                                                 |
| YHR188C   | [GPI16] Transmembrane protein subunit of the glycosylphosphatidylinositol transamidase complex that adds GPIs to newly synthesized proteins; human PIG-Tp homolog GPI transamidase component, human PIG-T homologue                                                                                                                                                                                                                                                                                                                                                                                                                          |
| YML132W   | [COS3] Protein involved in salt resistance; interacts with sodium:hydrogen antiporter Nha1p; member of the DUP380 subfamily of conserved, often subtelomerically-encoded proteins                                                                                                                                                                                                                                                                                                                                                                                                                                                            |
| YIR022W   | [SEC11] 18kDa catalytic subunit of the Signal Peptidase Complex (SPC; Spc1p, Spc2p, Spc3p, and Sec11p) which cleaves the signal sequence of proteins targeted to the endoplasmic reticulum                                                                                                                                                                                                                                                                                                                                                                                                                                                   |
| YAL018C   |                                                                                                                                                                                                                                                                                                                                                                                                                                                                                                                                                                                                                                              |
| YBL040C   | [ERD2] Integral membrane protein that binds to the HDEL motif in proteins destined for retention in the endoplasmic reticulum; has a role in maintenance of normal levels of ER-resident proteins HDEL receptor                                                                                                                                                                                                                                                                                                                                                                                                                              |
| YLR034C   | [SMF3] Putative divalent metal ion transporter involved in iron homeostasis; transcriptionally regulated by metal ions; member of the Nramp family of metal transport proteins Nramp homolog SMF1 and SMF2 homolog metal transporter (putative)                                                                                                                                                                                                                                                                                                                                                                                              |
| YDL206W   |                                                                                                                                                                                                                                                                                                                                                                                                                                                                                                                                                                                                                                              |
| YJL091C   | [GWT1] Protein involved in the inositol acylation of glucosaminyl phosphatidylinositol (GlcN-PI) to form glucosaminyl(acyl)phosphatidylinositol (GlcN(acyl)PI), an intermediate in the biosynthesis of glycosylphosphatidylinositol (GPI) anchors overexpression confers 1-[4-butylbenzyl]isoquinoline (BIQ)-resistant growth in <i>S. cerevisiae</i> .                                                                                                                                                                                                                                                                                      |
| YML123C   | [PHO84] High-affinity inorganic phosphate (Pi) transporter and low-affinity manganese transporter; regulated by Pho4p and Spt7p; mutation confers resistance to arsenate; exit from the ER during maturation requires Pho86p inorganic phosphate transporter                                                                                                                                                                                                                                                                                                                                                                                 |
| YAR028W   |                                                                                                                                                                                                                                                                                                                                                                                                                                                                                                                                                                                                                                              |
| YLL023C   |                                                                                                                                                                                                                                                                                                                                                                                                                                                                                                                                                                                                                                              |

|           |                                                                                                                                                                                                                                                                                                                                                                                                                                                                                                                                                |
|-----------|------------------------------------------------------------------------------------------------------------------------------------------------------------------------------------------------------------------------------------------------------------------------------------------------------------------------------------------------------------------------------------------------------------------------------------------------------------------------------------------------------------------------------------------------|
| YPL234C   | [TFP3] Vacuolar ATPase V0 domain subunit c', involved in proton transport activity; hydrophobic integral membrane protein (proteolipid) containing four transmembrane segments; N and C termini are in the vacuolar lumen vacuolar ATPase V0 domain subunit c' (17 kDa) vacuolar H(+) ATPase 17 kDa subunit C Null mutant is viable, defective in vacuolar acidification, high copy TFP3 confers resistance to trifluoperazine                                                                                                                 |
| YBR298C   | [MAL31] Maltose permease, high-affinity maltose transporter (alpha-glucoside transporter); encoded in the MAL3 complex locus; member of the 12 transmembrane domain superfamily of sugar transporters; functional in genomic reference strain S288C maltose permease Defective maltose fermentation                                                                                                                                                                                                                                            |
| YHR123W   | [EPT1] sn-1,2-diacylglycerol ethanolamine- and cholinephosphotranferase; not essential for viability sn-1,2-diacylglycerol ethanolamine- and cholinephosphotranferase                                                                                                                                                                                                                                                                                                                                                                          |
| YDR046C   | [BAP3] Amino acid permease involved in the uptake of cysteine, leucine, isoleucine and valine valine transporter                                                                                                                                                                                                                                                                                                                                                                                                                               |
| YCL052C   | [PBN1] Essential component of glycosylphosphatidylinositol-mannosyltransferase I, required for the autocatalytic post-translational processing of the protease B precursor Prb1p, localizes to ER in luminal orientation; homolog of mammalian PIG-X protease B nonderepressible form Null mutant is inviable; overexpression of both PBN1 and LRE1 confers resistance to laminarinase, which degrades cell wall beta(1-3) glucan linkages; overexpression of either gene alone has no effect on cell wall glucans or glucan synthase activity |
| YHL003C   | [LAG1] Ceramide synthase component, involved in synthesis of ceramide from C26(acyl)-coenzyme A and dihydrosphingosine or phytosphingosine, functionally equivalent to Lac1p                                                                                                                                                                                                                                                                                                                                                                   |
| YAR027W   | [UIP3] Putative integral membrane protein of unknown function; interacts with Ulp1p at the nuclear periphery; member of DUP240 gene family                                                                                                                                                                                                                                                                                                                                                                                                     |
| YIL114C   | [POR2] Putative mitochondrial porin (voltage-dependent anion channel), related to Por1p but not required for mitochondrial membrane permeability or mitochondrial osmotic stability voltage dependent anion channel (YVDAC2) Null mutant is viable; omp2 por2 double null mutant shows poor growth; POR2 is a multicopy suppressor of omp2 null temperature-sensitive petite phenotype                                                                                                                                                         |
| YDL054C   | [MCH1] Protein with similarity to mammalian monocarboxylate permeases, which are involved in transport of monocarboxylic acids across the plasma membrane; mutant is not deficient in monocarboxylate transport                                                                                                                                                                                                                                                                                                                                |
| YGR289C   | [MAL11] Maltose permease, inducible high-affinity maltose transporter (alpha-glucoside transporter); encoded in the MAL1 complex locus; member of the 12 transmembrane domain superfamily of sugar transporters alpha-glucoside transporter hexose transporter maltose permease Mutant is defective in maltose fermentation.                                                                                                                                                                                                                   |
| YML012W   | [ERV25] Protein that forms a heterotrimeric complex with Erp1, Erp2p, and Emp24, member of the p24 family involved in endoplasmic reticulum to Golgi transport vesicle coat component Null mutant is viable, displays a selective defect in transport of secretory proteins from the ER to Golgi complex.                                                                                                                                                                                                                                      |
| YHR007C   | [ERG11] Lanosterol 14-alpha-demethylase, catalyzes the C-14 demethylation of lanosterol to form 4,4"-dimethyl cholesta-8,14,24-triene-3-beta-ol in the ergosterol biosynthesis pathway; member of the cytochrome P450 family cytochrome P450 lanosterol 14a-demethylase Null mutant is inviable, erg11 null inviability is suppressed by deletion of ERG3; erg11 mutants are ergosterol biosynthesis defective; many are also nystatin resistant                                                                                               |
| YLR004C   |                                                                                                                                                                                                                                                                                                                                                                                                                                                                                                                                                |
| YDR414C   | [ERD1] Predicted membrane protein required for the retention of luminal endoplasmic reticulum proteins; mutants secrete the endogenous ER protein, BiP (Kar2p) disruption of the retention system for ER proteins; defects in the Golgi-dependent modification of glycoproteins exhibits defects in N-glycosylation of proteins                                                                                                                                                                                                                |
| YJL214W   | [HXT8] Protein of unknown function with similarity to hexose transporter family members, expression is induced by low levels of glucose and repressed by high levels of glucose hexose permease                                                                                                                                                                                                                                                                                                                                                |
| YMR264W   | [CUE1] Endoplasmic reticulum membrane protein that recruits the ubiquitin-conjugating enzyme Ubc7p to the ER where it functions in protein degradation; contains a CUE domain that binds ubiquitin to facilitate intramolecular monoubiquitination Ubc7p binding and recruitment protein Null mutant is viable and shows stabilization of ER degradation substrates                                                                                                                                                                            |
| YEL027W   | [CUP5] Proteolipid subunit of the vacuolar H(+)-ATPase V0 sector (subunit c; dicyclohexylcarbodiimide binding subunit); required for vacuolar acidification and important for copper and iron metal ion homeostasis 17 kDa VO sector subunit dicyclohexylcarbodiimide binding subunit proteolipid vacuolar ATP synthase proteolipid C vacuolar ATPase V0 domain subunit c (dicyclohexylcarbodiimide binding subunit) (17 kDa) Null mutant is viable, petite, copper sensitive                                                                  |
| YGL104C   | [VPS73] Mitochondrial protein of unknown function involved in vacuolar protein sorting Null mutant secretes CPY.                                                                                                                                                                                                                                                                                                                                                                                                                               |
| YNL048W   | [ALG11] Alpha-1,2-mannosyltransferase, catalyzes addition of the terminal alpha 1,2-Man to the Man5GlcNAc2-PP-dolichol intermediate during asparagine-linked glycosylation in the ER Null mutant displays poor growth and temperature-sensitive lethality                                                                                                                                                                                                                                                                                      |
| YCR024C-A | [PMP1] Small single-membrane span proteolipid that functions as a regulatory subunit of the plasma membrane H(+)-ATPase Pma1p, forms unique helix and positively charged cytoplasmic domain that is able to specifically segregate phosphatidylserines proteolipid associated with plasma membrane H(+)-ATPase (Pma1p) Null mutant is viable; pmp1 pmp2 double mutant displays a lower Vmax for the plasma membrane H(+)-ATPase (Pma1p)                                                                                                        |
| YAL007C   | [ERP2] Protein that forms a heterotrimeric complex with Erp1p, Emp24p, and Erv25p; member, along with Emp24p and Erv25p, of the p24 family involved in ER to Golgi transport and localized to COPII-coated vesicles p24 protein involved in membrane trafficking null mutant is viable; delayed transport of Gas1p                                                                                                                                                                                                                             |
| YPR198W   | [SGE1] Membrane-associated multidrug transporter, acts as an extrusion permease, member of the drug-resistance protein family within the major facilitator superfamily (MFS), partial multicopy suppressor of gal11 mutations Null mutant is viable; shows decreased expression of galactose-inducible genes; shows increased sensitivity to crystal violet                                                                                                                                                                                    |
| YFL041W   | [FET5] Multicopper oxidase, integral membrane protein with similarity to Fet3p; may have a role in iron transport multicopper oxidase type 1 integral membrane protein overexpression of FET5 suppresses a fet3 null mutant.                                                                                                                                                                                                                                                                                                                   |
| YML075C   | [HMG1] One of two isozymes of HMG-CoA reductase that catalyzes the conversion of HMG-CoA to mevalonate, which is a rate-limiting step in sterol biosynthesis; localizes to the nuclear envelope; overproduction induces the formation of karmellae 3-hydroxy-3-methylglutaryl-coenzyme A (HMG-CoA) reductase isozyme Null mutant is viable, sensitive to compactin, a competitive inhibitor of HMG-CoA reductase; hmg1 hmg2 double deletion mutants are inviable                                                                               |
| YLR343W   | [GAS2] Putative 1,3-beta-glucanosyltransferase, has similarity to Gas1p                                                                                                                                                                                                                                                                                                                                                                                                                                                                        |
| YDR276C   | [PMP3] Small plasma membrane protein related to a family of plant polypeptides that are overexpressed under high salt concentration or low temperature, not essential for viability, deletion causes hyperpolarization of the plasma membrane potential hypothetical transmembrane protein Null mutant is viable and sensitive to cations such as sodium                                                                                                                                                                                       |
| YOL003C   | [PFA4] Palmitoyltransferase with autoacylation activity; member of a family of putative palmitoyltransferases containing an Asp-His-His-Cysteine rich (DHHC-CRD) domain palmitoyltransferase                                                                                                                                                                                                                                                                                                                                                   |

|           |                                                                                                                                                                                                                                                                                                                                                                                                                                                                     |
|-----------|---------------------------------------------------------------------------------------------------------------------------------------------------------------------------------------------------------------------------------------------------------------------------------------------------------------------------------------------------------------------------------------------------------------------------------------------------------------------|
| YOR254C   | [SEC63] Essential subunit of Sec63 complex (Sec63p, Sec62p, Sec66p and Sec72p); with Sec61 complex, Kar2p/BiP and Lhs1p forms a channel competent for SRP-dependent and post-translational SRP-independent protein targeting and import into the ER lethal                                                                                                                                                                                                          |
| YBR069C   | [TAT1] Amino acid transport protein for valine, leucine, isoleucine, and tyrosine, low-affinity tryptophan and histidine transporter; overexpression confers FK506 resistance amino acid transport protein for valine, leucine, isoleucine, and tyrosine overexpression confers resistance to the volatile anesthetic isoflurane.                                                                                                                                   |
| YOL132W   | [GAS4] Putative 1,3-beta-glucanosyltransferase, has similarity to Gas1p; localizes to the cell wall                                                                                                                                                                                                                                                                                                                                                                 |
| YHR110W   | [ERP5] Protein with similarity to Emp24p and Erv25p, member of the p24 family involved in ER to Golgi transport p24 protein involved in membrane trafficking                                                                                                                                                                                                                                                                                                        |
| YBR283C   | [SSH1] Subunit of the Ssh1 translocon complex; Sec61p homolog involved in co-translational pathway of protein translocation; not essential Null mutant is viable, but grows slowly                                                                                                                                                                                                                                                                                  |
| YGL051W   | [MST27] Putative integral membrane protein, involved in vesicle formation; forms complex with Mst28p; member of DUP240 gene family; binds COPI and COPII vesicles protein with COPI and COPII binding motifs                                                                                                                                                                                                                                                        |
| YPL274W   | [SAM3] High-affinity S-adenosylmethionine permease, required for utilization of S-adenosylmethionine as a sulfur source; has similarity to S-methylmethionine permease Mmp1p high affinity S-adenosylmethionine permease Null mutant is viable but has inability to use S-adenosylmethionine as a sulfur source                                                                                                                                                     |
| YPR192W   | [AQY1] Spore-specific water channel that mediates the transport of water across cell membranes, developmentally controlled; may play a role in spore maturation, probably by allowing water outflow, may be involved in freeze tolerance aquaporin Null mutant is viable and exhibits improved viability when grown under hypo-osmolar or hyper-osmolar stress.                                                                                                     |
| YGR260W   | [TNA1] High affinity nicotinic acid plasma membrane permease, responsible for uptake of low levels of nicotinic acid; expression of the gene increases in the absence of extracellular nicotinic acid or para-aminobenzoate (PABA) high affinity nicotinic acid plasma membrane permease Null mutant is viable; the deletion of both YGR260W and YJR025C/BNA1 is lethal at low external nicotinic acid concentration                                                |
| YMR058W   | [FET3] Ferro-O <sub>2</sub> -oxidoreductase required for high-affinity iron uptake and involved in mediating resistance to copper ion toxicity, belongs to class of integral membrane multicopper oxidases multicopper oxidase The null mutant is viable but defective for high affinity Fe(II) uptake. The null mutant is inviable when environmental iron is limiting.                                                                                            |
| YER026C   | [CHO1] Phosphatidylserine synthase, functions in phospholipid biosynthesis; catalyzes the reaction CDP-diaclyglycerol + L-serine = CMP + L-1-phosphatidylserine, transcriptionally repressed by myo-inositol and choline phosphatidylserine synthase The null mutant is viable but grows slowly on minimal medium. The growth rate of the null mutant on minimal medium can be increased by supplementing the medium with choline or other phospholipid precursors. |
| YEL017C-A | [PMP2] Proteolipid associated with plasma membrane H(+)-ATPase (Pma1p); regulates plasma membrane H(+)-ATPase activity; nearly identical to PMP1 proteolipid associated with plasma membrane H(+)-ATPase (Pma1p)                                                                                                                                                                                                                                                    |
| YPL227C   | [ALG5] UDP-glucose:dolichyl-phosphate glucosyltransferase, involved in asparagine-linked glycosylation in the endoplasmic reticulum UDP-glucose:dolichyl-phosphate glucosyltransferase underglycosylation of carboxypeptidase Y                                                                                                                                                                                                                                     |
| YHL042W   |                                                                                                                                                                                                                                                                                                                                                                                                                                                                     |
| YDR307W   |                                                                                                                                                                                                                                                                                                                                                                                                                                                                     |
| YHR142W   | [CHS7] Protein of unknown function, involved in chitin biosynthesis by regulating Chs3p export from the ER                                                                                                                                                                                                                                                                                                                                                          |
| YDL212W   | [SHR3] Endoplasmic reticulum packaging chaperone, required for incorporation of amino acid permeases into COPII coated vesicles for transport to the cell surface Null mutants are viable, specifically accumulate amino acid permeases in the endoplasmic reticulum                                                                                                                                                                                                |
| YPR028W   | [YOP1] Membrane protein that interacts with Yip1p to mediate membrane traffic; overexpression results in cell death and accumulation of internal cell membranes; regulates vesicular traffic in stressed cells                                                                                                                                                                                                                                                      |
| YCL025C   | [AGP1] Low-affinity amino acid permease with broad substrate range, involved in uptake of asparagine, glutamine, and other amino acids; expression is regulated by the SPS plasma membrane amino acid sensor system (Ssy1p-Ptr3p-Ssy5p) amino acid permease Null mutant is viable; resistant to the amino acid analog gamma-hydroxyaspartate, decreased growth on asn, gln and some other amino acids in strains in which Gap1 and Gnp1 are also missing.           |
| YPR156C   | [TPO3] Polyamine transport protein specific for spermine; localizes to the plasma membrane; member of the major facilitator superfamily                                                                                                                                                                                                                                                                                                                             |
| YHR026W   | [PPA1] Subunit c" of the vacuolar ATPase, which functions in acidification of the vacuole; one of three proteolipid subunits of the V0 domain proteolipid/vacuolar ATPase V0 domain subunit c" Null mutant is inviable in some genetic backgrounds, in others, exhibits no V-ATPase activity and failure to assemble V-ATPase subunits onto the vacuolar membrane                                                                                                   |
| YLL028W   | [TPO1] Polyamine transporter that recognizes spermine, putrescine, and spermidine; catalyzes uptake of polyamines at alkaline pH and excretion at acidic pH; phosphorylation enhances activity and sorting to the plasma membrane                                                                                                                                                                                                                                   |
| YOR016C   | [ERP4] Protein with similarity to Emp24p and Erv25p, member of the p24 family involved in ER to Golgi transport p24 protein involved in membrane trafficking                                                                                                                                                                                                                                                                                                        |
| YLR018C   | [POM34] Integral membrane protein of the nuclear pore complex, localizes adjacent to the nuclear membrane integral membrane protein nuclear pore complex subunit                                                                                                                                                                                                                                                                                                    |
| YJR117W   | [STE24] Highly conserved zinc metalloprotease that functions in two steps of a-factor maturation, C-terminal CAAX proteolysis and the first step of N-terminal proteolytic processing; contains multiple transmembrane spans zinc metallo-protease Null mutant is viable, exhibits a mating efficiency of ~5% that of a wild-type strain and an a-factor processing defect                                                                                          |
| YGR284C   | [ERV29] Protein localized to COPII-coated vesicles, involved in vesicle formation and incorporation of specific secretory cargo ER-Golgi transport vesicle protein                                                                                                                                                                                                                                                                                                  |
| YJR010C-A | [SPC1] Subunit of the signal peptidase complex (SPC), which cleaves the signal sequence from proteins targeted to the endoplasmic reticulum (ER), homolog of the SPC12 subunit of mammalian signal peptidase complex Null mutant is viable; synthetically lethal with a conditional mutation in sec11; high copy Spc1 suppresses the conditional sec11 mutation                                                                                                     |
| YEL063C   | [CAN1] Plasma membrane arginine permease, requires phosphatidyl ethanolamine (PE) for localization, exclusively associated with lipid rafts; mutation confers canavanine resistance arginine permease Canavanine resistance                                                                                                                                                                                                                                         |
| YNL101W   | [AVT4] Vacuolar transporter, exports large neutral amino acids from the vacuole; member of a family of seven S. cerevisiae genes (AVT1-7) related to vesicular GABA-glycine transporters Gln (Asn), Ile (Leu), Tyr transporter                                                                                                                                                                                                                                      |
| YGL200C   | [EMP24] Integral membrane component of endoplasmic reticulum-derived COPII-coated vesicles, which function in ER to Golgi transport type I transmembrane protein                                                                                                                                                                                                                                                                                                    |

|         |                                                                                                                                                                                                                                                                                                                                                                                                                                                                                                                                               |
|---------|-----------------------------------------------------------------------------------------------------------------------------------------------------------------------------------------------------------------------------------------------------------------------------------------------------------------------------------------------------------------------------------------------------------------------------------------------------------------------------------------------------------------------------------------------|
| YKL154W | [SRP102] Signal recognition particle (SRP) receptor beta subunit; involved in SRP-dependent protein targeting; anchors Srp101p to the ER membrane Null mutant is viable but exhibits slow growth and cannot grow on nonfermentable carbon sources. Temperature-sensitive alleles exhibit defects in translocation of some ER proteins at the nonpermissive temperature.                                                                                                                                                                       |
| YHL048W | [COS8] Nuclear membrane protein, member of the DUP380 subfamily of conserved, often subtelomerically-encoded proteins; regulation suggests a potential role in the unfolded protein response                                                                                                                                                                                                                                                                                                                                                  |
| YIL016W | [SNL1] Protein of unknown function proposed to be involved in nuclear pore complex biogenesis and maintenance as well as protein folding; has similarity to the mammalian BAG-1 protein 18.3 kDa integral membrane protein Null mutant is viable; SNL1 is a high copy suppressor of nup116, gle2 and nic96 alleles                                                                                                                                                                                                                            |
| YHR133C | [NSG1] Protein involved in regulation of sterol biosynthesis; specifically stabilizes Hmg2p, one of two HMG-CoA isoenzymes that catalyze the rate-limiting step in sterol biosynthesis; homolog of mammalian INSIG proteins Null: none                                                                                                                                                                                                                                                                                                        |
| YML048W | [GSF2] ER localized integral membrane protein that may promote secretion of certain hexose transporters, including Gal2p; involved in glucose-dependent repression A Tn3 insertion into this gene causes hypersensitivity to the cell surface polymer perturbing agent calcofluor white; Defective in glucose repression; mutants decrease transcriptional repression by MIG1; alter glucose-regulated subunit interactions within the Snf1 protein kinase complex; the effects of eff1 and eff2 on SUC2 repression are strongly synergistic. |
| YBR036C | [CSG2] Endoplasmic reticulum membrane protein, required for mannosylation of inositolphosphorylceramide and for growth at high calcium concentrations Null mutant is viable but Ca <sup>2+</sup> -sensitive; a presumed point mutant is sensitive to Ca <sup>2+</sup> levels greater than 10 mM (but remains insensitive to 50 mM Sr <sup>2+</sup> )                                                                                                                                                                                          |
| YBR159W | [YBR159W] Microsomal beta-keto-reductase; contains oleate response element (ORE) sequence in the promoter region; mutants exhibit reduced VLCFA synthesis, accumulate high levels of dihydrosphingosine, phytosphingosine and medium-chain ceramides.                                                                                                                                                                                                                                                                                         |
| YBR183W | [YPC1] Alkaline ceramidase that also has reverse (CoA-independent) ceramide synthase activity, catalyzes both breakdown and synthesis of phytoceramide; overexpression confers fumonisin B1 resistance alkaline ceramidase with reverse activity Null mutant is viable and two times more heat resistant than the wild-type parental strain.                                                                                                                                                                                                  |
| YBR290W | [BSD2] Heavy metal ion homeostasis protein, facilitates trafficking of Smf1p and Smf2p metal transporters to the vacuole where they are degraded, controls metal ion transport, prevents metal hyperaccumulation, functions in copper detoxification                                                                                                                                                                                                                                                                                          |
| YBR106W | [PHO88] Probable membrane protein, involved in phosphate transport; pho88 pho86 double null mutant exhibits enhanced synthesis of repressible acid phosphatase at high inorganic phosphate concentrations Null mutant is viable; pho88 pho86 double mutant shows enhanced synthesis of repressible acid phosphatase in high phosphate media and arsenate resistance; disruption or high dosage of PHO88 results in reduced phosphate intake                                                                                                   |
| YCR034W | [FEN1] Fatty acid elongase, involved in sphingolipid biosynthesis; acts on fatty acids of up to 24 carbons in length; mutations have regulatory effects on 1,3-beta-glucan synthase, vacuolar ATPase, and the secretory pathway Null mutant is viable; slow growth; fenpropimorph resistant; resistant to a pneumocandin B0 analog (L-733,560); mating and sporulation defects; synthetic lethality with ELO3                                                                                                                                 |
| YKL008C | [LAC1] Ceramide synthase component, involved in synthesis of ceramide from C26(acyl)-coenzyme A and dihydrosphingosine or phytosphingosine, functionally equivalent to Lag1p LAG1 longevity gene homolog Null mutant is viable but exhibits synthetic lethality with mutations in lag1.                                                                                                                                                                                                                                                       |
| YPL264C |                                                                                                                                                                                                                                                                                                                                                                                                                                                                                                                                               |
| YDR297W | [SUR2] Sphinganine C4-hydroxylase, catalyses the conversion of sphinganine to phytosphingosine in sphingolipid biosynthesis sphingosine hydroxylase Null mutant has altered phospholipid levels; suppressor of rvs161 and rvs167 mutations.                                                                                                                                                                                                                                                                                                   |
| YDR331W | [GPI8] ER membrane glycoprotein subunit of the glycosylphosphatidylinositol transamidase complex that adds glycosylphosphatidylinositol (GPI) anchors to newly synthesized proteins; human PIG-K protein is a functional homolog                                                                                                                                                                                                                                                                                                              |
| YJL196C | [ELO1] Elongase I, medium-chain acyl elongase, catalyzes carboxy-terminal elongation of unsaturated C12-C16 fatty acyl-CoAs to C16-C18 fatty acids elongase Null mutant is viable, but shows no growth on media supplemented with less than 16-C saturated fatty acid in a fatty acid synthase minus background                                                                                                                                                                                                                               |
| YLR372W | [SUR4] Elongase, involved in fatty acid and sphingolipid biosynthesis; synthesizes very long chain 20-26-carbon fatty acids from C18-CoA primers; involved in regulation of sphingolipid biosynthesis elongase Null mutants is viable, not sensitive to UV or gamma radiation. sur4 mutants suppress rad3, rvs161 delta, and rvs167 mutations. sur4 fen1 mutants and sur4 elo2 mutants are inviable.                                                                                                                                          |
| YBR110W | [ALG1] Mannosyltransferase, involved in asparagine-linked glycosylation in the endoplasmic reticulum (ER); essential for viability, mutation is functionally complemented by human ortholog beta-1,4-mannosyltransferase                                                                                                                                                                                                                                                                                                                      |
| YKL065C | [YET1] Endoplasmic reticulum transmembrane protein, homolog of human BAP31 protein homolog of mammalian BAP31                                                                                                                                                                                                                                                                                                                                                                                                                                 |
| YDL015C | [TSC13] Enoyl reductase that catalyzes the last step in each cycle of very long chain fatty acid elongation, localizes to the ER, highly enriched in a structure marking nuclear-vacuolar junctions, coimmunoprecipitates with elongases Fen1p and Sur4p enoyl reductase                                                                                                                                                                                                                                                                      |
| YJL117W | [PHO86] Endoplasmic reticulum (ER) resident protein required for ER exit of the high-affinity phosphate transporter Pho84p, specifically required for packaging of Pho84p into COPII vesicles Null mutant is viable and expresses repressible acid phosphatase in high phosphate medium; pho86 pho87 double mutant and pho86 pho88 double mutant constitutively synthesize repressible acid phosphatase and are arsenate-resistant; pho84 pho86 pho87 triple mutant grows more slowly than pho84 mutant                                       |
| YPL076W | [GPI2] Protein involved in the synthesis of N-acetylglucosaminyl phosphatidylinositol (GlcNAc-PI), the first intermediate in the synthesis of glycosylphosphatidylinositol (GPI) anchors; homologous to the human PIG-C protein                                                                                                                                                                                                                                                                                                               |
| YGR060W | [ERG25] C-4 methyl sterol oxidase, catalyzes the first of three steps required to remove two C-4 methyl groups from an intermediate in ergosterol biosynthesis; mutants accumulate the sterol intermediate 4,4-dimethylzymosterol C-4 sterol methyl oxidase                                                                                                                                                                                                                                                                                   |
| YHR140W |                                                                                                                                                                                                                                                                                                                                                                                                                                                                                                                                               |
| YMR215W | [GAS3] Putative 1,3-beta-glucanosyltransferase, has similarity to Gas1p; localizes to the cell wall                                                                                                                                                                                                                                                                                                                                                                                                                                           |
| 0112    | GO_TERM:[transferase activity] P-Value:1.8e-02                                                                                                                                                                                                                                                                                                                                                                                                                                                                                                |
| YBR038W | [CHS2] Chitin synthase II, requires activation from zymogenic form in order to catalyze the transfer of N-acetylglucosamine (GlcNAc) to chitin; required for the synthesis of chitin in the primary septum during cytokinesis chitin synthase 2                                                                                                                                                                                                                                                                                               |

|                         |                                                                                                                                                                                                                                                                                                                        |
|-------------------------|------------------------------------------------------------------------------------------------------------------------------------------------------------------------------------------------------------------------------------------------------------------------------------------------------------------------|
| YPR106W                 | [ISR1] Predicted protein kinase, overexpression causes sensitivity to staurosporine, which is a potent inhibitor of protein kinase C protein kinase The null mutant is viable but exacerbates the phenotypes of a temperature-sensitive allele (stt1-1) of PKC1.                                                       |
| 0113                    | GO_TERM:[transporter activity] P-Value:2.9e-02 OVERLAP:[TOM - transport across the outer membrane] <290.10> SIZE:9                                                                                                                                                                                                     |
| YHL036W                 | [MUP3] Low affinity methionine permease, similar to Mup1p very low affinity methionine permease                                                                                                                                                                                                                        |
| YPR163C                 | [TIF3] Translation initiation factor eIF-4B, has RNA annealing activity; contains an RNA recognition motif and binds to single-stranded RNA translation initiation factor eIF-4B                                                                                                                                       |
| YDR351W                 | [SBE2] Protein involved in the transport of cell wall components from the Golgi to the cell surface; required for bud growth                                                                                                                                                                                           |
| YLR157C                 | [ASP3-2] Cell-wall L-asparaginase II, involved in asparagine catabolism; expression is induced during nitrogen starvation; four copies of ASP3 are present in the genome reference strain S288C nitrogen catabolite-regulated cell-wall L-asparaginase II                                                              |
| <a href="#">YNL070W</a> | [TOM7] Component of the TOM (translocase of outer membrane) complex responsible for recognition and initial import steps for all mitochondrially directed proteins; promotes assembly and stability of the TOM complex translocase of the outer mitochondrial membrane                                                 |
| 0114                    | GO_TERM:[endoplasmic reticulum] P-Value:7.1e-02                                                                                                                                                                                                                                                                        |
| YOL065C                 | [INP54] Phosphatidylinositol 4,5-bisphosphate 5-phosphatase with a role in secretion, localizes to the endoplasmic reticulum via the C-terminal tail; lacks the Sac1 domain and proline-rich region found in the other 3 INP proteins inositol polyphosphate 5-phosphatase                                             |
| YDL204W                 | [RTN2] Protein of unknown function; has similarity to mammalian reticulon proteins; member of the RTNLA (reticulon-like A) subfamily                                                                                                                                                                                   |
| YMR110C                 | [HFD1] Putative fatty aldehyde dehydrogenase, located in the mitochondrial outer membrane and also in lipid particles; has similarity to human fatty aldehyde dehydrogenase (FALDH) which is implicated in Sjogren-Larsson syndrome                                                                                    |
| 0115                    | GO_TERM:[endoplasmic reticulum] P-Value:1.6e-02                                                                                                                                                                                                                                                                        |
| YGR149W                 |                                                                                                                                                                                                                                                                                                                        |
| YNL219C                 | [ALG9] Mannosyltransferase, involved in N-linked glycosylation; catalyzes the transfer of mannose from Dol-P-Man to lipid-linked oligosaccharides; mutation of the human ortholog causes type 1 congenital disorders of glycosylation mannosyltransferase                                                              |
| YJL097W                 | [PHS1] Protein of unknown function; homolog of mammalian PTPLA; involved in sphingolipid biosynthesis; required for cell viability                                                                                                                                                                                     |
| YDR371W                 | [CTS2] Sporulation-specific chitinase Sporulation-specific chitinase Null mutant fails to form mature asci, synthesis of spore wall surface layers is affected.                                                                                                                                                        |
| YIR038C                 | [GTT1] ER associated glutathione S-transferase capable of homodimerization; expression induced during the diauxic shift and throughout stationary phase; functional overlap with Gtt2p, Grx1p, and Grx2p glutathione transferase heat shock sensitive at stationary phase                                              |
| 0116                    | GO_TERM:[catalytic activity] P-Value:7.3e-02                                                                                                                                                                                                                                                                           |
| YKR103W                 | [NFT1] Putative transporter of the multidrug resistance-associated protein (MRP) subfamily; adjacent ORFs YKR103W and YKR104W are merged in different strain backgrounds. Putative MRP-type ABC transporter                                                                                                            |
| YNL274C                 |                                                                                                                                                                                                                                                                                                                        |
| 0117                    | GO_TERM:[translation regulator activity] P-Value:6.2e-10 OVERLAP:[Mitochondrial processing complexes] <440.20> SIZE:4                                                                                                                                                                                                  |
| <a href="#">YJL209W</a> | [CBP1] Mitochondrial protein that interacts with the 5'-untranslated region of the COB mRNA and has a role in its stability and translation; found in a complex at the inner membrane along with Pet309p Null mutant is viable, unable to respire due to degradation of mitochondrially encoded cytochrome b (cob) RNA |
| YLR067C                 | [PET309] Specific translational activator for the COX1 mRNA, also influences stability of intron-containing COX1 primary transcripts; located in the mitochondrial inner membrane petite; unable to grow on non-fermentable carbon sources                                                                             |
| YER153C                 | [PET122] Specific translational activator for the COX3 mRNA that acts together with Pet54p and Pet494p; located in the mitochondrial inner membrane translational activator of cytochrome C oxidase subunit III petite; unable to grow on non-fermentable carbon sources                                               |
| YMR257C                 | [PET111] Specific translational activator for the COX2 mRNA, located in the mitochondrial inner membrane translational activator of cytochrome C oxidase subunit II                                                                                                                                                    |

|                |                                                                                                                                                                                                                                                                                                                                                                                                                                                                             |
|----------------|-----------------------------------------------------------------------------------------------------------------------------------------------------------------------------------------------------------------------------------------------------------------------------------------------------------------------------------------------------------------------------------------------------------------------------------------------------------------------------|
| YGR222W        | [PET54] Protein required for splicing of the COX1 intron A15 beta; also specifically required, together with Pet122p and Pet494p, for translation of the COX3 mRNA; located in the mitochondrial inner membrane petite; unable to grow on non-fermentable carbon sources                                                                                                                                                                                                    |
| YNR045W        | [PET494] Specific translational activator for the COX3 mRNA that acts together with Pet54p and Pet122p; located in the mitochondrial inner membrane translational activator of cytochrome C oxidase petite; unable to grow on non-fermentable carbon sources                                                                                                                                                                                                                |
| 0118           | GO_TERM:[molecular_function] P-Value:3.9e-01                                                                                                                                                                                                                                                                                                                                                                                                                                |
| YHR074W        | [QNS1] Glutamine-dependent NAD(+) synthetase, essential for the formation of NAD(+) from nicotinic acid adenine dinucleotide glutamine-dependent NAD synthetase                                                                                                                                                                                                                                                                                                             |
| YIL092W        |                                                                                                                                                                                                                                                                                                                                                                                                                                                                             |
| YNR040W        |                                                                                                                                                                                                                                                                                                                                                                                                                                                                             |
| YIL023C        | [YIL023C] Yeast KE4, yeast ortholog of the mouse KE4 ER zinc transporter                                                                                                                                                                                                                                                                                                                                                                                                    |
| YNL187W        |                                                                                                                                                                                                                                                                                                                                                                                                                                                                             |
| YJL045W        |                                                                                                                                                                                                                                                                                                                                                                                                                                                                             |
| YLR161W        |                                                                                                                                                                                                                                                                                                                                                                                                                                                                             |
| YNR028W        | [CPR8] Peptidyl-prolyl cis-trans isomerase (cyclophilin), catalyzes the cis-trans isomerization of peptide bonds N-terminal to proline residues; similarity to Cpr4p suggests a potential role in the secretory pathway cyclophilin peptidyl-prolyl cis-trans isomerase (PPIase)                                                                                                                                                                                            |
| 0119           | GO_TERM:[lipase activity] P-Value:2.0e-04                                                                                                                                                                                                                                                                                                                                                                                                                                   |
| YCR068W        | [ATG15] Lipase, required for intravacuolar lysis of autophagic bodies; located in the endoplasmic reticulum membrane and targeted to intravacuolar vesicles during autophagy via the multivesicular body (MVB) pathway cvt17 is defective in lysis of autophagic vesicles after delivery to the vacuole. Null mutant is starvation-sensitive, accumulates subvacuolar vesicles, defective in maturation of aminopeptidase I and in autophagy.                               |
| YPR065W        | [ROX1] Heme-dependent repressor of hypoxic genes; contains an HMG domain that is responsible for DNA bending activity HMG-domain site-specific DNA binding protein. The null mutant is viable but misexpresses several heme-regulated genes.                                                                                                                                                                                                                                |
| YER019W        | [ISC1] Inositol phosphosphingolipid phospholipase C, hydrolyzes inositolphosphosphingolipids, activated by phosphatidylserine, cardiolipin, and phosphatidylglycerol, mediates Na <sup>+</sup> and Li <sup>+</sup> halotolerance, contains a P loop-like domain ISC1 encodes phospholipase C type enzyme which hydrolyzes inositolphosphosphingolipids (IPC, MIPC, M(IP)2C) as well as sphingomyelin. Null mutant is viable and contains more inositolphosphosphingolipids. |
| YER104W        | [RTT105] Protein with a role in regulation of Ty1 transposition Null mutant is viable; disruption causes increase in Ty1 retrotransposition.                                                                                                                                                                                                                                                                                                                                |
| 0120           | GO_TERM:[molecular_function] P-Value:6.9e-01 OVERLAP:[mitochondrial ribosomal large subunit] <500.60.10> SIZE:44                                                                                                                                                                                                                                                                                                                                                            |
| YNL018C        |                                                                                                                                                                                                                                                                                                                                                                                                                                                                             |
| YOL075C        |                                                                                                                                                                                                                                                                                                                                                                                                                                                                             |
| <b>YJL096W</b> | [MRPL49] Mitochondrial ribosomal protein of the large subunit                                                                                                                                                                                                                                                                                                                                                                                                               |
| YBL080C        | [PET112] Protein required for mitochondrial translation; mutation is functionally complemented by a Bacillus subtilis ortholog 62 kDa protein Null mutant is viable but shows destabilization of the mitochondrial genome, making cells rho- and unable to grow on non-fermentable carbon sources; pet112-1 mutant is blocked in accumulation of cytochrome c oxidase subunit II                                                                                            |
| YCR106W        | [RDS1] Zinc cluster protein involved in conferring resistance to cycloheximide transcriptional regulator                                                                                                                                                                                                                                                                                                                                                                    |
| 0121           | GO_TERM:[succinyl-CoA ligase activity] P-Value:2.7e-07 OVERLAP:[Succinyl-CoA ligase] <485> SIZE:2                                                                                                                                                                                                                                                                                                                                                                           |
| <b>YGR244C</b> | [LSC2] Beta subunit of succinyl-CoA ligase, which is a mitochondrial enzyme of the TCA cycle that catalyzes the nucleotide-dependent conversion of succinyl-CoA to succinate Null mutant is viable but grows slowly on minimal glycerol or pyruvate; mutant suppresses idh2 null mutants for growth on glycerol                                                                                                                                                             |
| <b>YOR142W</b> | [LSC1] Alpha subunit of succinyl-CoA ligase, which is a mitochondrial enzyme of the TCA cycle that catalyzes the nucleotide-dependent conversion of succinyl-CoA to succinate Null mutant is viable but grows slowly on minimal glycerol or pyruvate; mutant suppresses idh2 null mutants for growth on glycerol                                                                                                                                                            |
| 0122           | GO_TERM:[organellar large ribosomal subunit] P-Value:1.1e-03 OVERLAP:[mitochondrial ribosomal large subunit] <500.60.10> SIZE:44                                                                                                                                                                                                                                                                                                                                            |
| <b>YBR268W</b> | [MRPL37] Mitochondrial ribosomal protein of the large subunit                                                                                                                                                                                                                                                                                                                                                                                                               |
| <b>YDL202W</b> | [MRPL11] Mitochondrial ribosomal protein of the large subunit Null mutant is viable, respiratory deficient accompanied by a loss of mitochondrial DNA                                                                                                                                                                                                                                                                                                                       |

|                         |                                                                                                                                                                                                                                                                                                                                                                                       |
|-------------------------|---------------------------------------------------------------------------------------------------------------------------------------------------------------------------------------------------------------------------------------------------------------------------------------------------------------------------------------------------------------------------------------|
| 0123                    | GO_TERM:[cellular_component] P-Value:5.8e-02                                                                                                                                                                                                                                                                                                                                          |
| YER066W                 |                                                                                                                                                                                                                                                                                                                                                                                       |
| YMR154C                 | [RIM13] Calpain-like protease involved in proteolytic activation of Ri0m101p in response to alkaline pH; has similarity to <i>A. nidulans</i> palB cysteine protease Mutant shows reduced expression of IME1, defect in Rim1p C-terminal proteolytic processing, reduced sporulation, slow growth at 17 degrees, smooth colony morphology and slow growth in alkaline medium (pH8.0). |
| 0124                    | OVERLAP:[mitochondrial ribosomal large subunit] <500.60.10> SIZE:44                                                                                                                                                                                                                                                                                                                   |
| <a href="#">YCR003W</a> | [MRPL32] Mitochondrial ribosomal protein of the large subunit ribosomal protein (YmL32)                                                                                                                                                                                                                                                                                               |
| YIR039C                 | [YPS6] Putative GPI-anchored aspartic protease GPI-anchored aspartic protease                                                                                                                                                                                                                                                                                                         |
| 0125                    |                                                                                                                                                                                                                                                                                                                                                                                       |
| YGR079W                 |                                                                                                                                                                                                                                                                                                                                                                                       |
| YNL081C                 | [SWS2] Putative mitochondrial ribosomal protein of the small subunit, has similarity to <i>E. coli</i> S13 ribosomal protein Null mutant is viable but causes slight growth defect, sporulation defect; similar to <i>S. pombe</i> 40S mitochondrial ribosomal protein; expression of GFP fusion increases on YPGE.                                                                   |
| 0126                    | GO_TERM:[molecular_function] P-Value:1.7e-01                                                                                                                                                                                                                                                                                                                                          |
| YMR064W                 | [AEP1] Protein required for expression of the mitochondrial OLI1 gene encoding subunit 9 of F1-F0 ATP synthase permanently respiratory defective; unable to translate OLI1 transcripts                                                                                                                                                                                                |
| YMR098C                 |                                                                                                                                                                                                                                                                                                                                                                                       |
| 0127                    | GO_TERM:[organellar_ribosome] P-Value:6.2e-107 OVERLAP:[mitochondrial ribosomal small subunit] <500.60.20> SIZE:31                                                                                                                                                                                                                                                                    |
| YGR076C                 | [MRPL25] Mitochondrial ribosomal protein of the large subunit Null mutant is viable, cells become Pet-                                                                                                                                                                                                                                                                                |
| YOR150W                 | [MRPL23] Mitochondrial ribosomal protein of the large subunit                                                                                                                                                                                                                                                                                                                         |
| YBR122C                 | [MRPL36] Mitochondrial ribosomal protein of the large subunit; overproduction suppresses mutations in the COX2 leader peptide-encoding region                                                                                                                                                                                                                                         |
| YPL173W                 | [MRPL40] Mitochondrial ribosomal protein of the large subunit                                                                                                                                                                                                                                                                                                                         |
| YLR312W-A               | [MRPL15] Mitochondrial ribosomal protein of the large subunit                                                                                                                                                                                                                                                                                                                         |
| YKL167C                 | [MRP49] Mitochondrial ribosomal protein of the large subunit, not essential for mitochondrial translation 16 kDa mitochondrial ribosomal large subunit protein Null mutant is viable, cold-sensitive, respiration deficient, defective in assembly of stable 54S ribosomal subunits                                                                                                   |
| YMR193W                 | [MRPL24] Mitochondrial ribosomal protein of the large subunit                                                                                                                                                                                                                                                                                                                         |
| YKR006C                 | [MRPL13] Mitochondrial ribosomal protein of the large subunit, not essential for mitochondrial translation                                                                                                                                                                                                                                                                            |
| YKR085C                 | [MRPL20] Mitochondrial ribosomal protein of the large subunit Null mutant is viable; shows loss of mitochondrial function, instability of mitochondrial DNA                                                                                                                                                                                                                           |
| YMR024W                 | [MRPL3] Mitochondrial ribosomal protein of the large subunit                                                                                                                                                                                                                                                                                                                          |
| YDR116C                 | [MRPL1] Mitochondrial ribosomal protein of the large subunit                                                                                                                                                                                                                                                                                                                          |
| YNL185C                 | [MRPL19] Mitochondrial ribosomal protein of the large subunit                                                                                                                                                                                                                                                                                                                         |
| YDR405W                 | [MRP20] Mitochondrial ribosomal protein of the large subunit Null mutant is viable, becomes [rho-] or [rho0]                                                                                                                                                                                                                                                                          |
| YLR439W                 | [MRPL4] Mitochondrial ribosomal protein of the large subunit Null mutant is viable, fails to grow on nonfermentable carbon sources, has growth defects on fermentable carbon sources                                                                                                                                                                                                  |
| YCR071C                 | [IMG2] Mitochondrial ribosomal protein of the small subunit Null mutant is viable but shows respiratory deficiency and loss of wild-type mtDNA: conversion to rho- and rho zero petites                                                                                                                                                                                               |
| YNL252C                 | [MRPL17] Mitochondrial ribosomal protein of the large subunit                                                                                                                                                                                                                                                                                                                         |
| YNL284C                 | [MRPL10] Mitochondrial ribosomal protein of the large subunit; appears as two protein spots (YmL10 and YmL18) on two-dimensional SDS gels                                                                                                                                                                                                                                             |
| YDR462W                 | [MRPL28] Mitochondrial ribosomal protein of the large subunit                                                                                                                                                                                                                                                                                                                         |
| YNL005C                 | [MRP7] Mitochondrial ribosomal protein of the large subunit                                                                                                                                                                                                                                                                                                                           |
| YBL038W                 | [MRPL16] Mitochondrial ribosomal protein of the large subunit ribosomal protein                                                                                                                                                                                                                                                                                                       |
| YDR237W                 | [MRPL7] Mitochondrial ribosomal protein of the large subunit                                                                                                                                                                                                                                                                                                                          |
| YDR322W                 | [MRPL35] Mitochondrial ribosomal protein of the large subunit                                                                                                                                                                                                                                                                                                                         |
| YGR220C                 | [MRPL9] Mitochondrial ribosomal protein of the large subunit                                                                                                                                                                                                                                                                                                                          |

|                  |                                                                                                                                                                                                                                                                                                                                                                                                                                                                                                       |
|------------------|-------------------------------------------------------------------------------------------------------------------------------------------------------------------------------------------------------------------------------------------------------------------------------------------------------------------------------------------------------------------------------------------------------------------------------------------------------------------------------------------------------|
| YDR296W          | [MHR1] Protein involved in homologous recombination in mitochondria and in transcription regulation in nucleus; binds to activation domains of acidic activators; required for recombination-dependent mtDNA partitioning Temperature sensitive in the maintenance of mitochondrial DNA                                                                                                                                                                                                               |
| YCR046C          | [IMG1] Mitochondrial ribosomal protein of the small subunit, required for respiration and for maintenance of the mitochondrial genome mitochondrial ribosomal protein Null mutant is viable; respiration deficient                                                                                                                                                                                                                                                                                    |
| YML025C          | [YML6] Mitochondrial ribosomal protein of the large subunit, has similarity to E. coli L4 ribosomal protein and human mitoribosomal MRP-L4 protein; essential for viability, unlike most other mitoribosomal proteins                                                                                                                                                                                                                                                                                 |
| YGR185C          | [TYS1] Cytoplasmic tyrosyl-tRNA synthetase, class I aminoacyl-tRNA synthetase that aminoacylates tRNA(Tyr), required for cytoplasmic protein synthesis, interacts with positions 34 and 35 of the anticodon of tRNA <sup>Tyr</sup> tyrosine-tRNA ligase                                                                                                                                                                                                                                               |
| <b>YMR158W</b>   | [MRPS8] Mitochondrial ribosomal protein of the small subunit                                                                                                                                                                                                                                                                                                                                                                                                                                          |
| YDR494W          | [RSM28] Mitochondrial ribosomal protein of the small subunit; genetic interactions suggest a possible role in promoting translation initiation Mitochondrial ribosomal small subunit protein Null: Viable, Pet+, mild H2O2 sensitivity. Other phenotypes: Dominant suppressor allele, due to internal deletion, selected by asking for increased expression of COX2 alleles with short deletions in the leader peptide coding region.                                                                 |
| <b>YNR037C</b>   | [RSM19] Mitochondrial ribosomal protein of the small subunit, has similarity to E. coli S19 ribosomal protein mitochondrial ribosome small subunit component                                                                                                                                                                                                                                                                                                                                          |
| <b>YDL045W-A</b> | [MRP10] Mitochondrial ribosomal protein of the small subunit mitochondrial ribosome 37 S subunit component Null mutant is viable, defective in mitochondrial translation and shows a tendency to accumulate deletions in mitochondrial DNA                                                                                                                                                                                                                                                            |
| <b>YKL003C</b>   | [MRP17] Mitochondrial ribosomal protein of the small subunit; MRP17 exhibits genetic interactions with PET122, encoding a COX3-specific translational activator ribosomal protein MRP17 petite                                                                                                                                                                                                                                                                                                        |
| <b>YBL090W</b>   | [MRP21] Mitochondrial ribosomal protein of the large subunit; MRP21 exhibits genetic interactions with mutations in the COX2 and COX3 mRNA 5'-untranslated leader sequences mitochondrial ribosome small subunit component Null mutant is viable, exhibits completely blocked mitochondrial gene expression; missense mutations suppress 5'-UTL mutations in at least 2 mitochondrial mRNAs                                                                                                           |
| <b>YMR188C</b>   | [MRPS17] Mitochondrial ribosomal protein of the small subunit                                                                                                                                                                                                                                                                                                                                                                                                                                         |
| YDR124W          |                                                                                                                                                                                                                                                                                                                                                                                                                                                                                                       |
| YNR036C          |                                                                                                                                                                                                                                                                                                                                                                                                                                                                                                       |
| YJL063C          | [MRPL8] Mitochondrial ribosomal protein of the large subunit Null mutant is viable; shows loss of mitochondrial function, instability of mitochondrial DNA                                                                                                                                                                                                                                                                                                                                            |
| <b>YGR215W</b>   | [RSM27] Mitochondrial ribosomal protein of the small subunit mitochondrial ribosome small subunit component                                                                                                                                                                                                                                                                                                                                                                                           |
| <b>YGR084C</b>   | [MRP13] Mitochondrial ribosomal protein of the small subunit 35 kDa mitochondrial ribosomal small subunit protein Null mutant is viable, no impairment in ribosome synthesis or function                                                                                                                                                                                                                                                                                                              |
| <b>YNL306W</b>   | [MRPS18] Mitochondrial ribosomal protein of the small subunit; essential for viability, unlike most other mitoribosomal proteins                                                                                                                                                                                                                                                                                                                                                                      |
| YOL027C          | [MDM38] Mitochondrial inner membrane protein, required for K <sup>+</sup> /H <sup>+</sup> exchange and for normal mitochondrial morphology and inheritance; associates with mitochondrial ribosomes; human ortholog Letm1 is implicated in Wolf-Hirschhorn syndrome                                                                                                                                                                                                                                   |
| YIL070C          | [MAM33] Acidic protein of the mitochondrial matrix involved in oxidative phosphorylation; related to the human complement receptor gC1q-R                                                                                                                                                                                                                                                                                                                                                             |
| <b>YJR101W</b>   | [RSM26] Mitochondrial ribosomal protein of the small subunit mitochondrial ribosome small subunit component                                                                                                                                                                                                                                                                                                                                                                                           |
| YPR125W          | [YLH47] Mitochondrial inner membrane protein exposed to the mitochondrial matrix, associates with mitochondrial ribosomes, NOT required for respiratory growth; homolog of human Letm1, a protein implicated in Wolf-Hirschhorn syndrome                                                                                                                                                                                                                                                              |
| <b>YBR146W</b>   | [MRPS9] Mitochondrial ribosomal protein of the small subunit ribosomal protein S9 (putative) Null mutant is viable, respiration deficient, exhibits defects in mitochondrial protein synthesis as indicated by a loss of cytochrome c oxidase activity                                                                                                                                                                                                                                                |
| <b>YPL118W</b>   | [MRP51] Mitochondrial ribosomal protein of the large subunit; MRP51 exhibits genetic interactions with mutations in the COX2 and COX3 mRNA 5'-untranslated leader sequences mitochondrial ribosome small subunit component Null mutant is viable, exhibits completely blocked mitochondrial gene expression; missense mutations suppress 5'-UTL mutations in at least 2 mitochondrial mRNAs                                                                                                           |
| <b>YOR158W</b>   | [PET123] Mitochondrial ribosomal protein of the small subunit; PET123 exhibits genetic interactions with PET122, which encodes a COX3 mRNA-specific translational activator mitochondrial ribosomal protein of small subunit Null mutant is viable but is rho- (with large deletions in mtDNA); pet123 mutations can suppress pet122 mutations; some pet123 alleles show synthetic phenotypes with mrp1 mutations                                                                                     |
| <b>YIL093C</b>   | [RSM25] Mitochondrial ribosomal protein of the small subunit mitochondrial ribosome small subunit component Null mutant is viable, but unable to respire.                                                                                                                                                                                                                                                                                                                                             |
| <b>YHL004W</b>   | [MRP4] Mitochondrial ribosomal protein of the small subunit mitochondrial ribosomal protein/mitochondrial ribosome 37 S subunit component similar to E. coli ribosomal protein S2                                                                                                                                                                                                                                                                                                                     |
| <b>YGR165W</b>   | [MRPS35] Mitochondrial ribosomal protein of the small subunit                                                                                                                                                                                                                                                                                                                                                                                                                                         |
| <b>YJR113C</b>   | [RSM7] Mitochondrial ribosomal protein of the small subunit, has similarity to E. coli S7 ribosomal protein mitochondrial ribosome small subunit component                                                                                                                                                                                                                                                                                                                                            |
| <b>YGL129C</b>   | [RSM23] Mitochondrial ribosomal protein of the small subunit, has similarity to mammalian apoptosis mediator proteins; null mutation prevents induction of apoptosis by overproduction of metacaspase Mca1p ATPase (putative) mitochondrial ribosome small subunit component                                                                                                                                                                                                                          |
| <b>YDR175C</b>   | [RSM24] Mitochondrial ribosomal protein of the small subunit mitochondrial ribosome small subunit component                                                                                                                                                                                                                                                                                                                                                                                           |
| <b>YDR337W</b>   | [MRPS28] Mitochondrial ribosomal protein of the small subunit ribosomal protein (E. coli S15) Null mutant is viable, unable to respire, spontaneously loses portions of its mitochondrial genomes at a high frequency                                                                                                                                                                                                                                                                                 |
| YDR036C          | [EHD3] Protein of unconfirmed function, plays an indirect role in endocytic membrane trafficking, member of a family of enoyl-CoA hydratase/isomerases                                                                                                                                                                                                                                                                                                                                                |
| <b>YBR251W</b>   | [MRPS5] Mitochondrial ribosomal protein of the small subunit ribosomal protein S5 (putative)                                                                                                                                                                                                                                                                                                                                                                                                          |
| <b>YDR347W</b>   | [MRP1] Mitochondrial ribosomal protein of the small subunit; MRP1 exhibits genetic interactions with PET122, encoding a COX3-specific translational activator, and with PET123, encoding a small subunit mitochondrial ribosomal protein 37 kDa mitochondrial ribosomal protein defective mitochondrial protein synthesis; absence of a and b type cytochromes; reduced levels of mitochondrial 15 S rRNA; defective processing of apocytochrome b intron; convert to rho- and rho0 at high frequency |
| <b>YER050C</b>   | [RSM18] Mitochondrial ribosomal protein of the small subunit, has similarity to E. coli S18 ribosomal protein mitochondrial ribosome small subunit component null is unable to grow on glycerol                                                                                                                                                                                                                                                                                                       |

|                         |                                                                                                                                                                                                                                                                                                                                                                                                                                                                |
|-------------------------|----------------------------------------------------------------------------------------------------------------------------------------------------------------------------------------------------------------------------------------------------------------------------------------------------------------------------------------------------------------------------------------------------------------------------------------------------------------|
| <a href="#">YPL013C</a> | [MRPS16] Mitochondrial ribosomal protein of the small subunit                                                                                                                                                                                                                                                                                                                                                                                                  |
| <a href="#">YKL155C</a> | [RSM22] Mitochondrial ribosomal protein of the small subunit mitochondrial ribosome small subunit component Null mutant is viable, unable to respire                                                                                                                                                                                                                                                                                                           |
| <a href="#">YDR041W</a> | [RSM10] Mitochondrial ribosomal protein of the small subunit, has similarity to E. coli S10 ribosomal protein; essential for viability, unlike most other mitoribosomal proteins mitochondrial ribosome small subunit component                                                                                                                                                                                                                                |
| <a href="#">YNL137C</a> | [NAM9] Mitochondrial ribosomal component of the small subunit mitochondrial S4 ribosomal protein (putative) Null mutant is viable but is respiration-deficient and loses mitochondrial DNA integrity                                                                                                                                                                                                                                                           |
| 0128                    | GO_TERM:[molecular_function] P-Value:2.0e-01                                                                                                                                                                                                                                                                                                                                                                                                                   |
| YDR018C                 |                                                                                                                                                                                                                                                                                                                                                                                                                                                                |
| YDR479C                 | [PEX29] Peroxisomal integral membrane protein, involved in regulation of peroxisome size and number; genetic interactions suggest that Pex28p and Pex29p act at steps upstream of those mediated by Pex30p, Pex31p, and Pex32p peroxin Peroxisomes of cells deleted for either or both of PEX28 and PEX29 are increased in number, exhibit extensive clustering, are smaller, and often exhibit membrane thickening between adjacent peroxisomes in a cluster. |
| YDR374C                 |                                                                                                                                                                                                                                                                                                                                                                                                                                                                |
| YIL051C                 | [MMF1] Mitochondrial protein involved in maintenance of the mitochondrial genome Null mutant is viable but cannot utilize glycerol as a carbon source; the mitochondrial DNA is deleted and the number of mitochondria is reduced in the null mutant                                                                                                                                                                                                           |
| 0129                    | GO_TERM:[mitochondrial envelope] P-Value:5.4e-05 OVERLAP:[Cytochrome c oxidase (complex IV)] <420.40> SIZE:11                                                                                                                                                                                                                                                                                                                                                  |
| YDR231C                 | [COX20] Mitochondrial inner membrane protein, required for proteolytic processing of Cox2p and its assembly into cytochrome c oxidase required for maturation and assembly of cytochrome oxidase subunit II Null mutant is respiratory-deficient and has no cytochrome oxidase activity or accumulation of precursor of CoxII                                                                                                                                  |
| <a href="#">Q0250</a>   | [COX2] Subunit II of cytochrome c oxidase, which is the terminal member of the mitochondrial inner membrane electron transport chain; one of three mitochondrially-encoded subunits cytochrome c oxidase subunit II                                                                                                                                                                                                                                            |
| YBR024W                 | [SCO2] Protein anchored to the mitochondrial inner membrane, similar to Sco1p and may have a redundant function with Sco1p in delivery of copper to cytochrome c oxidase; interacts with Cox2p                                                                                                                                                                                                                                                                 |
| YBR037C                 | [SCO1] Copper-binding protein of the mitochondrial inner membrane, required for cytochrome c oxidase activity and respiration; may function to deliver copper to cytochrome c oxidase; has similarity to thioredoxins required for accumulation of mitochondrial cytochrome c oxidase subunits I and II                                                                                                                                                        |
| 0130                    | GO_TERM:[mitochondrial electron transport, cytochrome c to oxygen] P-Value:1.9e-22 OVERLAP:[Cytochrome c oxidase (complex IV)] <420.40> SIZE:11                                                                                                                                                                                                                                                                                                                |
| <a href="#">YHR051W</a> | [COX6] Subunit VI of cytochrome c oxidase, which is the terminal member of the mitochondrial inner membrane electron transport chain; expression is regulated by oxygen levels cytochrome c oxidase subunit Null mutant is viable, sensitive to H2O2                                                                                                                                                                                                           |
| <a href="#">YDL067C</a> | [COX9] Subunit VIIa of cytochrome c oxidase, which is the terminal member of the mitochondrial inner membrane electron transport chain cytochrome c oxidase subunit VIIa Lacks functional cytochrome c oxidase holoenzyme                                                                                                                                                                                                                                      |
| <a href="#">YGL187C</a> | [COX4] Subunit IV of cytochrome c oxidase, which is the terminal member of the mitochondrial inner membrane electron transport chain; N-terminal 25 residues of precursor are cleaved during mitochondrial import cytochrome c oxidase subunit IV                                                                                                                                                                                                              |
| <a href="#">YNL052W</a> | [COX5A] Subunit Va of cytochrome c oxidase, which is the terminal member of the mitochondrial inner membrane electron transport chain; predominantly expressed during aerobic growth while its isoform Vb (Cox5Bp) is expressed during anaerobic growth cytochrome c oxidase subunit Va Null mutant is viable, respire at 10-15% of the wild-type rate due to the presence of COX5B; cox5a cox5b double deletion mutants are completely non-respiratory        |
| <a href="#">YLR395C</a> | [COX8] Subunit VIII of cytochrome c oxidase, which is the terminal member of the mitochondrial inner membrane electron transport chain cytochrome c oxidase subunit VIII Null mutant is viable, deficient in cellular respiration and cytochrome C oxidase activity                                                                                                                                                                                            |
| YML129C                 | [COX14] Mitochondrial membrane protein, required for assembly of cytochrome c oxidase mitochondrial membrane protein Nuclear respiration deficient, lack cytochromes a and a3 and detectable cytochrome oxidase activity                                                                                                                                                                                                                                       |
| <a href="#">YMR256C</a> | [COX7] Subunit VII of cytochrome c oxidase, which is the terminal member of the mitochondrial inner membrane electron transport chain cytochrome c oxidase subunit VII Null mutant is viable, lacks cytochrome c oxidase activity and haem a/a3 spectra; respiratory deficient                                                                                                                                                                                 |
| YER154W                 | [OXA1] Translocase of the mitochondrial inner membrane, mediates the insertion of both mitochondrial- and nuclear-encoded proteins from the matrix into the inner membrane, interacts with mitochondrial ribosomes; null is respiratory deficient                                                                                                                                                                                                              |
| <a href="#">Q0045</a>   | [COX1] Subunit I of cytochrome c oxidase, which is the terminal member of the mitochondrial inner membrane electron transport chain; one of three mitochondrially-encoded subunits cytochrome c oxidase subunit I                                                                                                                                                                                                                                              |
| <a href="#">Q0275</a>   | [COX3] Subunit III of cytochrome c oxidase, which is the terminal member of the mitochondrial inner membrane electron transport chain; one of three mitochondrially-encoded subunits cytochrome c oxidase subunit III                                                                                                                                                                                                                                          |
| 0131                    | GO_TERM:[RNA polymerase I upstream activating factor complex] P-Value:1.1e-12 OVERLAP:[Upstream Activation Factor (UAF) complex] <510.30> SIZE:3                                                                                                                                                                                                                                                                                                               |
| YOR295W                 | [UAF30] Subunit of UAF (upstream activation factor), which is an RNA polymerase I specific transcription stimulatory factor composed of Uaf30p, Rrn5p, Rrn9p, Rrn10p, histones H3 and H4; deletion decreases cellular growth rate Null mutant is viable but exhibits slow growth. A double mutant with top1 is inviable.                                                                                                                                       |
| YPL224C                 | [MMT2] Putative metal transporter involved in mitochondrial iron accumulation; closely related to Mmt1p Null mutant is viable, mmt1 mmt2 double deletion mutants exhibit a growth defect on low iron medium                                                                                                                                                                                                                                                    |
| <a href="#">YLR141W</a> | [RRN5] Protein involved in transcription of rDNA by RNA polymerase I; transcription factor, member of UAF (upstream activation factor) family along with Rrn9p and Rrn10p UAF member (upstream activation factor) along with Rrn9p and Rrn10p transcription factor                                                                                                                                                                                             |
| <a href="#">YBL025W</a> | [RRN10] Protein involved in promoting high level transcription of rDNA, subunit of UAF (upstream activation factor) for RNA polymerase I upstream activation factor subunit Mutant shows reduction in the transcription of rDNA                                                                                                                                                                                                                                |

|                |                                                                                                                                                                                                                                                                                                                                                                                                                                    |
|----------------|------------------------------------------------------------------------------------------------------------------------------------------------------------------------------------------------------------------------------------------------------------------------------------------------------------------------------------------------------------------------------------------------------------------------------------|
|                | upstream activation factor subunit Mutant shows reduction in the transcription of rDNA                                                                                                                                                                                                                                                                                                                                             |
| <b>YMR270C</b> | [RRN9] Protein involved in promoting high level transcription of rDNA, subunit of UAF (upstream activation factor) for RNA polymerase I upstream activation factor subunit                                                                                                                                                                                                                                                         |
| 0132           | GO_TERM:[RNA polymerase I transcription factor activity] P-Value:3.9e-08 OVERLAP:[Core Factor (CF)] <510.20> SIZE:4                                                                                                                                                                                                                                                                                                                |
| YGR124W        | [ASN2] Asparagine synthetase, isozyme of Asn1p; catalyzes the synthesis of L-asparagine from L-aspartate in the asparagine biosynthetic pathway asparagine synthetase Null mutant is viable; L-asparagine auxotrophy occurs upon mutation of both ASN1 and ASN2                                                                                                                                                                    |
| YKL137W        |                                                                                                                                                                                                                                                                                                                                                                                                                                    |
| <b>YBL014C</b> | [RRN6] Protein involved in the transcription of 35S rRNA genes by RNA polymerase I; component of the core factor (CF) complex also composed of Rrn11p, Rrn7p and TATA-binding protein yeast Pol I core factor (CF) also composed of Rrn11p, Rrn7p and TATA-binding protein                                                                                                                                                         |
| <b>YJL025W</b> | [RRN7] Protein involved in the transcription of 35S rRNA genes by RNA polymerase I; component of the core factor (CF) complex also composed of Rrn11p, Rrn6p and TATA-binding protein yeast Pol I core factor (CF) also composed of Rrn11p, Rrn6p and TATA-binding protein                                                                                                                                                         |
| <b>YML043C</b> | [RRN11] Protein required for rDNA transcription by RNA polymerase I, component of the core factor (CF) of rDNA transcription factor, which also contains Rrn6p and Rrn7p rDNA transcription factor component                                                                                                                                                                                                                       |
| 0133           |                                                                                                                                                                                                                                                                                                                                                                                                                                    |
| YCR045C        |                                                                                                                                                                                                                                                                                                                                                                                                                                    |
| YOR348C        | [PUT4] Proline permease, required for high-affinity transport of proline; also transports the toxic proline analog azetidine-2-carboxylate (AzC); PUT4 transcription is repressed in ammonia-grown cells proline specific permease inability to use proline as a nitrogen source                                                                                                                                                   |
| 0134           | GO_TERM:[transcription from mitochondrial promoter] P-Value:2.0e-05                                                                                                                                                                                                                                                                                                                                                                |
| YFL036W        | [RPO41] Mitochondrial RNA polymerase; single subunit enzyme similar to those of T3 and T7 bacteriophages; requires a specificity subunit encoded by MTF1 for promoter recognition mitochondrial RNA polymerase                                                                                                                                                                                                                     |
| YMR238W        | [DFG5] Putative mannosidase, essential glycosylphosphatidylinositol (GPI)-anchored membrane protein required for cell wall biogenesis in bud formation, involved in filamentous growth, homologous to Dcw1p Null mutant is viable and defective in filamentous growth                                                                                                                                                              |
| YJR106W        | [ECM27] Non-essential protein of unknown function A Tn3 insertion into this gene causes hypersensitivity to the cell surface polymer perturbing agent calcofluor white.                                                                                                                                                                                                                                                            |
| YMR228W        | [MTF1] Mitochondrial RNA polymerase specificity factor with structural similarity to S-adenosylmethionine-dependent methyltransferases and functional similarity to bacterial sigma-factors, interacts with mitochondrial core polymerase Rpo41p mitochondrial RNA polymerase specificity factor Null mutant is viable, defective in respiration, and lacks mtDNA.                                                                 |
| YPR186C        | [PZF1] Transcription factor IIIA (TFIIIA), essential protein with nine C2H2 Zn-fingers, binds the 5S rRNA gene through the zinc finger domain and directs assembly of a multiprotein initiation complex for RNA polymerase III; also binds DNA transcription factor IIIA (putative)                                                                                                                                                |
| 0135           | GO_TERM:[cell wall] P-Value:2.7e-01 OVERLAP:[Ddc1p-Mec3p complex] <125.10.10> SIZE:2                                                                                                                                                                                                                                                                                                                                               |
| YLR050C        |                                                                                                                                                                                                                                                                                                                                                                                                                                    |
| YLR104W        |                                                                                                                                                                                                                                                                                                                                                                                                                                    |
| YGL168W        | [HUR1] Protein required for hydroxyurea resistance; has possible roles in DNA replication and maintenance of proper telomere length Null mutant is viable but sensitive to HU                                                                                                                                                                                                                                                      |
| YKL024C        | [URA6] Uridylate kinase, catalyzes the seventh enzymatic step in the de novo biosynthesis of pyrimidines, converting uridine monophosphate (UMP) into uridine-5'-diphosphate (UDP) uridine-monophosphate kinase (uridylate kinase) uracil requiring                                                                                                                                                                                |
| YLR290C        |                                                                                                                                                                                                                                                                                                                                                                                                                                    |
| YKL163W        | [PIR3] O-glycosylated covalently-bound cell wall protein required for cell wall stability; expression is cell cycle regulated, peaking in M/G1 and also subject to regulation by the cell integrity pathway Null mutant is viable; pir1 hsp150 (pir2) pir3 triple mutant is slow-growing on agar slab and sensitive to heat shock                                                                                                  |
| YNL158W        | [PGA1] Essential protein required for maturation of Gas1p and Pho8p; green fluorescent protein (GFP)-fusion protein localizes to the nuclear periphery; has synthetic genetic interactions with secretory pathway genes                                                                                                                                                                                                            |
| YOL093W        | [TRM10] tRNA methyltransferase, methylates the N-1 position of guanosine in tRNAs                                                                                                                                                                                                                                                                                                                                                  |
| YNL190W        |                                                                                                                                                                                                                                                                                                                                                                                                                                    |
| YHR175W        | [CTR2] Putative low-affinity copper transporter of the vacuolar membrane; mutation confers resistance to toxic copper concentrations, while overexpression confers resistance to copper starvation ctr2 mutants display a high level of resistance to toxic copper concentrations. CTR2 overexpression provides increased resistance to copper starvation and is also associated with an increased sensitivity to copper toxicity. |
| YKL107W        |                                                                                                                                                                                                                                                                                                                                                                                                                                    |
| <b>YLR288C</b> | [MEC3] DNA damage and meiotic pachytene checkpoint protein; subunit of a heterotrimeric complex (Rad17p-Mec3p-Ddc1p) that forms a sliding clamp, loaded onto partial duplex DNA by a clamp loader complex; homolog of human and S. pombe Hus1                                                                                                                                                                                      |

|         |                                                                                                                                                                                                                                                                                                                                                                                                                                                             |
|---------|-------------------------------------------------------------------------------------------------------------------------------------------------------------------------------------------------------------------------------------------------------------------------------------------------------------------------------------------------------------------------------------------------------------------------------------------------------------|
| 0136    | GO_TERM:[transporter activity] P-Value:9.7e-05                                                                                                                                                                                                                                                                                                                                                                                                              |
| YPL092W | [SSU1] Plasma membrane sulfite pump involved in sulfite metabolism and required for efficient sulfite efflux; major facilitator superfamily protein major facilitator superfamily                                                                                                                                                                                                                                                                           |
| YAL067C | [SEO1] Putative permease, member of the allantate transporter subfamily of the major facilitator superfamily; mutation confers resistance to ethionine sulfoxide permease (putative)                                                                                                                                                                                                                                                                        |
| YBR180W | [DTR1] Multidrug resistance dityrosine transporter of the major facilitator superfamily, essential for spore wall synthesis, facilitates the translocation of bisformyl dityrosine through the prospore membrane dityrosine transporter MFS-MDR Null: Null mutant is viable; bisformyl dityrosine accumulates in cytoplasm of spores; spore wall dityrosine is significantly reduced                                                                        |
| YBR132C | [AGP2] High affinity polyamine permease, preferentially uses spermidine over putrescine; expression is down-regulated by osmotic stress; plasma membrane carnitine transporter, also functions as a low-affinity amino acid permease plasma membrane carnitine transporter Null mutant is viable; loss of growth on some amino acids as nitrogen source (leu, thr) in a strain which has no Gap1p or Agp1p function                                         |
| YHR042W | [NCP1] NADP-cytochrome P450 reductase; involved in ergosterol biosynthesis; associated and coordinately regulated with Erg11p NADP-cytochrome P450 reductase                                                                                                                                                                                                                                                                                                |
| 0137    | GO_TERM:[molecular_function] P-Value:2.0e-01                                                                                                                                                                                                                                                                                                                                                                                                                |
| YJL217W |                                                                                                                                                                                                                                                                                                                                                                                                                                                             |
| YPR118W |                                                                                                                                                                                                                                                                                                                                                                                                                                                             |
| YDR346C | [SVF1] Protein with a potential role in cell survival pathways, required for the diauxic growth shift; expression in mammalian cells increases survival under conditions inducing apoptosis Null: Mutants with insertion of a mini transposon near the start codon in the ORF are viable and suppress growth inhibition caused by cellular phosphorylated sphingoid bases.                                                                                  |
| YLR077W | [YLR077W] The authentic, non-tagged protein was localized to the mitochondria                                                                                                                                                                                                                                                                                                                                                                               |
| 0138    |                                                                                                                                                                                                                                                                                                                                                                                                                                                             |
| YBR263W | [SHM1] Mitochondrial serine hydroxymethyltransferase, involved in one-carbon metabolism                                                                                                                                                                                                                                                                                                                                                                     |
| YML018C |                                                                                                                                                                                                                                                                                                                                                                                                                                                             |
| 0139    | GO_TERM:[molecular_function] P-Value:5.9e-02                                                                                                                                                                                                                                                                                                                                                                                                                |
| YEL057C |                                                                                                                                                                                                                                                                                                                                                                                                                                                             |
| YBR242W |                                                                                                                                                                                                                                                                                                                                                                                                                                                             |
| YEL049W | [PAU2] Part of 23-member seripauperin multigene family encoded mainly in subtelomeric regions, active during alcoholic fermentation, regulated by anaerobiosis, negatively regulated by oxygen, repressed by heme                                                                                                                                                                                                                                           |
| YER170W | [ADK2] Mitochondrial adenylate kinase, catalyzes the reversible synthesis of GTP and AMP from GDP and ADP; may serve as a back-up for synthesizing GTP or ADP depending on metabolic conditions; 3' sequence of ADK2 varies with strain background adenylate kinase/mitochondrial GTP:AMP phosphotransferase                                                                                                                                                |
| YGL258W | [VEL1] Protein of unknown function; highly induced in zinc-depleted conditions and has increased expression in NAP1 deletion mutants                                                                                                                                                                                                                                                                                                                        |
| YBR262C | [YBR262C] The authentic, non-tagged protein was localized to the mitochondria                                                                                                                                                                                                                                                                                                                                                                               |
| YCL049C |                                                                                                                                                                                                                                                                                                                                                                                                                                                             |
| YKL002W | [DID4] Class E Vps protein of the ESCRT-III complex, required for sorting of integral membrane proteins into luminal vesicles of multivesicular bodies, and for delivery of newly synthesized vacuolar enzymes to the vacuole, involved in endocytosis class E vacuolar-protein sorting and endocytosis factor                                                                                                                                              |
| 0140    | GO_TERM:[response to pH] P-Value:2.0e-05                                                                                                                                                                                                                                                                                                                                                                                                                    |
| YDR043C | [NRG1] Transcriptional repressor that recruits the Cyc8p-Tup1p complex to promoters; mediates glucose repression and negatively regulates a variety of processes including filamentous growth and alkaline pH response binds to UAS-1 in the STA1 promoter and can interact with Ssn6p/transcriptional repressor Null mutant is viable, relieves glucose repression of SUC2 and STA1; suppresses snf mutations                                              |
| YHL027W | [RIM101] Transcriptional repressor involved in the response to pH; required for alkaline pH-stimulated differentiation pathways such as haploid invasive growth and sporulation; activated by proteolytic processing; has similarity to the A. nidulans transcription factor PacC Poor growth at low temperature, altered colony morphology, inefficient sporulation due to reduced expression of the meiotic activator IME1, and defective invasive growth |
| YJL056C | [ZAP1] Zinc-regulated transcription factor, binds to zinc-responsive promoter elements to induce transcription of certain genes in the presence of zinc; regulates its own transcription; contains seven zinc-finger domains High level expression of ZRT1 and ZRT2 in both zinc-limited and zinc-replete cells                                                                                                                                             |
| 0141    | GO_TERM:[late endosome to vacuole transport] P-Value:1.1e-10 OVERLAP:[Vps4p ATPase complex (Vps protein complex)] <260.70> SIZE:3                                                                                                                                                                                                                                                                                                                           |
| YDR486C | [VPS60] Cytoplasmic and vacuolar membrane protein involved in late endosome to vacuole transport; required for normal filament maturation during pseudohyphal growth; may function in targeting specific cargo proteins for degradation Null mutant is viable but a class E vps mutant (missorts vacuolar hydrolases and accumulates late endosomal compartment).                                                                                           |

|                |                                                                                                                                                                                                                                                                                                                                                                                                                                           |
|----------------|-------------------------------------------------------------------------------------------------------------------------------------------------------------------------------------------------------------------------------------------------------------------------------------------------------------------------------------------------------------------------------------------------------------------------------------------|
| YKR035W-A      | [DID2] Class E protein of the vacuolar protein-sorting (Vps) pathway, associates reversibly with the late endosome, has human ortholog that may be altered in breast tumors class E vacuolar-protein sorting and endocytosis factor Overexpression causes growth inhibition and G2 arrest in rad52 and cdc9 mutants; null mutants are canavanine-hypersensitive, temperature sensitive, and suppress defects associated with loss of DOA4 |
| YLR181C        | [VTA1] Multivesicular body (MVB) protein involved in endosomal protein sorting; binds to Vps20p and Vps4p; may regulate Vps4p function; binds Vps60p and may act at a late step in MVB formation; mutants show class E vacuolar-protein sorting defects Null: Class E defect in vacuolar protein sorting (accumulates FM4-64, Ste3, Vph1, Pep12 in the class E compartment)                                                               |
| YDR541C        |                                                                                                                                                                                                                                                                                                                                                                                                                                           |
| YPL084W        | [BRO1] Cytoplasmic class E vacuolar protein sorting (VPS) factor that coordinates deubiquitination in the multivesicular body (MVB) pathway by recruiting Doa4p to endosomes                                                                                                                                                                                                                                                              |
| YOR275C        | [RIM20] Protein involved in proteolytic activation of Rim101p in response to alkaline pH; member of the PalA/AIP1/Alix family; interacts with the ESCRT-III subunits Snf7p, suggesting a relationship between the response to pH and multivesicular body formation Null: Affected in sporulation and invasive growth. Other phenotypes: Alkaline sensitivity                                                                              |
| <b>YLR025W</b> | [SNF7] One of four subunits of the endosomal sorting complex required for transport III (ESCRT-III); involved in the sorting of transmembrane proteins into the multivesicular body (MVB) pathway; recruited from the cytoplasm to endosomal membranes                                                                                                                                                                                    |
| <b>YPR173C</b> | [VPS4] AAA-type ATPase required for efficient late endosome to vacuole transport; catalyzes the release of an endosomal membrane-associated class E VPS protein complex; cytoplasmic protein that is also associated with an endosomal compartment AAA ATPase Null mutant is viable, exhibits protein sorting and morphological defects                                                                                                   |
| 0142           | GO_TERM:[endosome membrane] P-Value:2.6e-23 OVERLAP:[Vps4p ATPase complex (Vps protein complex)] <260.70> SIZE:3                                                                                                                                                                                                                                                                                                                          |
| YCL008C        | [STP22] Component of the ESCRT-I complex, which is involved in ubiquitin-dependent sorting of proteins into the endosome; homologous to the mouse and human Tsg101 tumor susceptibility gene; mutants exhibit a Class E Vps phenotype putative ubiquitin receptor                                                                                                                                                                         |
| YGR206W        |                                                                                                                                                                                                                                                                                                                                                                                                                                           |
| <b>YKL041W</b> | [VPS24] One of four subunits of the endosomal sorting complex required for transport III (ESCRT-III); forms an ESCRT-III subcomplex with Did4p; involved in the sorting of transmembrane proteins into the multivesicular body (MVB) pathway                                                                                                                                                                                              |
| YLR119W        | [SRN2] Component of the ESCRT-I complex, which is involved in ubiquitin-dependent sorting of proteins into the endosome; suppressor of rna1-1 mutation; may be involved in RNA export from nucleus                                                                                                                                                                                                                                        |
| YJR102C        | [VPS25] Component of the ESCRT-II complex, which is involved in ubiquitin-dependent sorting of proteins into the endosome Null mutant is viable but a class E vps mutant (missorts vacuolar hydrolases and accumulates late endosomal compartment vacuolar hydrolases and accumulates a late endosomal compartment).                                                                                                                      |
| YPL002C        | [SNF8] Component of the ESCRT-II complex, which is involved in ubiquitin-dependent sorting of proteins into the endosome; appears to be functionally related to SNF7; involved in glucose derepression                                                                                                                                                                                                                                    |
| YMR077C        | [VPS20] Myristoylated subunit of ESCRTIII, the endosomal sorting complex required for transport of transmembrane proteins into the multivesicular body pathway to the lysosomal/vacuolar lumen; cytoplasmic protein recruited to endosomal membranes                                                                                                                                                                                      |
| YLR417W        | [VPS36] Component of the ESCRT-II complex, which is involved in ubiquitin-dependent sorting of proteins into the endosome                                                                                                                                                                                                                                                                                                                 |
| YPL065W        | [VPS28] Component of the ESCRT-I complex, which is involved in ubiquitin-dependent sorting of proteins into the endosome; involved in transport of precursors for soluble vacuolar hydrolases from the late endosome to the vacuole Null mutant is viable, shows moderate defects in both biosynthetic traffic and endocytic traffic destined for the vacuole                                                                             |
| 0143           | GO_TERM:[catalytic activity] P-Value:1.8e-01                                                                                                                                                                                                                                                                                                                                                                                              |
| YJL155C        | [FBP26] Fructose-2,6-bisphosphatase, required for glucose metabolism fructose-2,6-bisphosphatase Null mutant lacks fructose-2,6-bisphosphatase activity but can grow on glucose, fructose, galactose, pyruvate, glycerol and lactate                                                                                                                                                                                                      |
| YBR043C        | [QDR3] Multidrug transporter required for resistance to quinidine, barban, cisplatin, and bleomycin; member of the major facilitator superfamily of transporters conferring multiple drug resistance (MFS-MDR)                                                                                                                                                                                                                            |
| YGR157W        | [CHO2] Phosphatidylethanolamine methyltransferase (PEMT), catalyzes the first step in the conversion of phosphatidylethanolamine to phosphatidylcholine during the methylation pathway of phosphatidylcholine biosynthesis phosphatidyl-ethanolamine N-methyltransferase Null mutant is viable and accumulates phosphatidylethanolamine and has reduced levels of phosphatidylcholine                                                     |
| 0144           | GO_TERM:[phospholipid biosynthesis] P-Value:7.2e-04                                                                                                                                                                                                                                                                                                                                                                                       |
| YGR170W        | [PSD2] Phosphatidylserine decarboxylase of the Golgi and vacuolar membranes, converts phosphatidylserine to phosphatidylethanolamine phosphatidylserine decarboxylase Null mutant is viable and shows small decrease in phosphatidylserine decarboxylase activity; psd1 psd2 double mutant is an ethanolamine auxotroph and expresses no detectable phosphatidylserine decarboxylase activity                                             |
| YNL264C        | [PDR17] Phosphatidylinositol transfer protein (PITP), downregulates Plb1p-mediated turnover of phosphatidylcholine, found in the cytosol and microsomes, homologous to Pdr16p, deletion affects phospholipid composition Pdr16p homolog Sec14p homolog Null mutant is viable, exhibits no observable phenotypes; pdr16 pdr17 double deletion mutants exhibit altered lipid levels and drug hypersensitivity                               |
| 0145           | GO_TERM:[transposition, RNA-mediated] P-Value:1.6e-10                                                                                                                                                                                                                                                                                                                                                                                     |
| YFL002W-A      |                                                                                                                                                                                                                                                                                                                                                                                                                                           |
| YHR189W        | [PTH1] One of two (see also PTH2) mitochondrially-localized peptidyl-tRNA hydrolases; dispensable for cell growth and for mitochondrial respiration                                                                                                                                                                                                                                                                                       |

|                         |                                                                                                                                                                                                                                                                                                                                                                                                                                                                                                                          |
|-------------------------|--------------------------------------------------------------------------------------------------------------------------------------------------------------------------------------------------------------------------------------------------------------------------------------------------------------------------------------------------------------------------------------------------------------------------------------------------------------------------------------------------------------------------|
| YFL002W-B               |                                                                                                                                                                                                                                                                                                                                                                                                                                                                                                                          |
| YCL019W                 |                                                                                                                                                                                                                                                                                                                                                                                                                                                                                                                          |
| YCL020W                 |                                                                                                                                                                                                                                                                                                                                                                                                                                                                                                                          |
| YDR261W-A               |                                                                                                                                                                                                                                                                                                                                                                                                                                                                                                                          |
| YDR261W-B               |                                                                                                                                                                                                                                                                                                                                                                                                                                                                                                                          |
| 0146                    | GO_TERM:[catalytic activity] P-Value:6.3e-02 OVERLAP:[other respiration chain complexes] <420.60> SIZE:14                                                                                                                                                                                                                                                                                                                                                                                                                |
| YDR263C                 | [DIN7] Mitochondrial nuclease functioning in DNA repair and replication, modulates the stability of the mitochondrial genome, induced by exposure to mutagens, also induced during meiosis at a time nearly coincident with commitment to recombination                                                                                                                                                                                                                                                                  |
| YOR214C                 |                                                                                                                                                                                                                                                                                                                                                                                                                                                                                                                          |
| YMR291W                 |                                                                                                                                                                                                                                                                                                                                                                                                                                                                                                                          |
| <a href="#">YPL262W</a> | [FUM1] Fumarase, converts fumaric acid to L-malic acid in the TCA cycle; cytosolic and mitochondrial localization determined by the N-terminal mitochondrial targeting sequence and protein conformation fumarase (fumarate hydratase)                                                                                                                                                                                                                                                                                   |
| 0147                    | GO_TERM:[transporter activity] P-Value:1.8e-02                                                                                                                                                                                                                                                                                                                                                                                                                                                                           |
| YDR205W                 | [MSC2] Member of the cation diffusion facilitator family, localizes to the endoplasmic reticulum and nucleus; mutations affect the cellular distribution of zinc and also confer defects in meiotic recombination between homologous chromatids Null mutant is inviable on glycerol-ethanol at 37oC and exhibits sensitivity to H2O2                                                                                                                                                                                     |
| YNR039C                 | [ZRG17] Endoplasmic reticulum protein of unknown function, transcription is induced under conditions of zinc deficiency; mutant phenotype suggests a role in uptake of zinc                                                                                                                                                                                                                                                                                                                                              |
| YKL221W                 | [MCH2] Protein with similarity to mammalian monocarboxylate permeases, which are involved in transport of monocarboxylic acids across the plasma membrane; mutant is not deficient in monocarboxylate transport                                                                                                                                                                                                                                                                                                          |
| YOR221C                 | [MCT1] Predicted malonyl-CoA:ACP transferase, putative component of a type-II mitochondrial fatty acid synthase that produces intermediates for phospholipid remodeling malonyl-CoA:ACP transferase Null mutant is viable, respiratory deficient                                                                                                                                                                                                                                                                         |
| 0148                    | GO_TERM:[biological_process] P-Value:3.0e-02                                                                                                                                                                                                                                                                                                                                                                                                                                                                             |
| YER077C                 |                                                                                                                                                                                                                                                                                                                                                                                                                                                                                                                          |
| YCR100C                 |                                                                                                                                                                                                                                                                                                                                                                                                                                                                                                                          |
| YIL110W                 |                                                                                                                                                                                                                                                                                                                                                                                                                                                                                                                          |
| 0149                    | GO_TERM:[copper ion transport] P-Value:5.3e-05                                                                                                                                                                                                                                                                                                                                                                                                                                                                           |
| YDR270W                 | [CCC2] Cu(+2)-transporting P-type ATPase, required for export of copper from the cytosol into an extracytosolic compartment; has similarity to human proteins involved in Menkes and Wilsons diseases Null mutant is viable, exhibits defects in respiration and iron uptake                                                                                                                                                                                                                                             |
| YNL259C                 | [ATX1] Cytosolic copper metallochaperone that transports copper to the secretory vesicle copper transporter Ccc2p for eventual insertion into Fet3p, which is a multicopper oxidase required for high-affinity iron uptake copper chaperone hypersensitive toward paraquat (a generator of superoxide anion)                                                                                                                                                                                                             |
| 0150                    |                                                                                                                                                                                                                                                                                                                                                                                                                                                                                                                          |
| YML061C                 | [PIF1] DNA helicase involved in telomere formation and elongation; acts as a catalytic inhibitor of telomerase; also plays a role in repair and recombination of mitochondrial DNA 5'-3' DNA helicase Mitochondrial DNA is heat-labile; abnormal telomere formation                                                                                                                                                                                                                                                      |
| YMR063W                 | [RIM9] Protein of unknown function, involved in the proteolytic activation of Rim101p in response to alkaline pH; has similarity to A. nidulans Pali; putative membrane protein Null mutant is viable but displays reduced sporulation (due to defect in proteolytic processing of Rim101p) and smooth colony morphology; haploid grows slowly at low temperature and is defective in invasive growth; RIM101, 8,9 and 13 act in a single pathway (RIM101 pathway) functioning in parallel to MCK1 by epistasis analysis |
| 0151                    |                                                                                                                                                                                                                                                                                                                                                                                                                                                                                                                          |
| YER119C                 | [AVT6] Vacuolar transporter, exports aspartate and glutamate from the vacuole; member of a family of seven S. cerevisiae genes (AVT1-7) related to vesicular GABA-glycine transporters Asp, Glu transporter                                                                                                                                                                                                                                                                                                              |
| YKL055C                 | [OAR1] Mitochondrial 3-oxoacyl-[acyl-carrier-protein] reductase, may comprise a type II mitochondrial fatty acid synthase along with Mct1p 3-oxoacyl-[acyl-carrier-protein] reductase Null mutant is viable, respiratory deficient                                                                                                                                                                                                                                                                                       |
| 0152                    | GO_TERM:[organelle envelope] P-Value:2.1e-01                                                                                                                                                                                                                                                                                                                                                                                                                                                                             |

|                         |                                                                                                                                                                                                                                                                                                                                                                                                                                                                                            |
|-------------------------|--------------------------------------------------------------------------------------------------------------------------------------------------------------------------------------------------------------------------------------------------------------------------------------------------------------------------------------------------------------------------------------------------------------------------------------------------------------------------------------------|
| YLR021W                 |                                                                                                                                                                                                                                                                                                                                                                                                                                                                                            |
| YPL144W                 |                                                                                                                                                                                                                                                                                                                                                                                                                                                                                            |
| YEL039C                 | [CYC7] Cytochrome c isoform 2, expressed under hypoxic conditions; electron carrier of the mitochondrial intermembrane space that transfers electrons from ubiquinone-cytochrome c oxidoreductase to cytochrome c oxidase during cellular respiration iso-2-cytochrome c                                                                                                                                                                                                                   |
| YHR195W                 | [NVJ1] Nuclear envelope protein that interacts with the vacuolar membrane protein Vac8p to promote formation of nucleus-vacuole junctions during piecemeal microautophagy of the nucleus (PMN) Null mutant is viable; cells do not form nucleus-vacuole junctions                                                                                                                                                                                                                          |
| 0153                    | GO_TERM:[biological_process] P-Value:9.6e-02                                                                                                                                                                                                                                                                                                                                                                                                                                               |
| YBR090C                 |                                                                                                                                                                                                                                                                                                                                                                                                                                                                                            |
| YER158C                 |                                                                                                                                                                                                                                                                                                                                                                                                                                                                                            |
| 0154                    | GO_TERM:[transporter activity] P-Value:1.8e-02                                                                                                                                                                                                                                                                                                                                                                                                                                             |
| YKL120W                 | [OAC1] Mitochondrial inner membrane transporter, transports oxaloacetate, sulfate, and thiosulfate; member of the mitochondrial carrier family oxaloacetate transport protein                                                                                                                                                                                                                                                                                                              |
| YNR055C                 | [HOL1] Putative ion transporter similar to the major facilitator superfamily of transporters; mutations in membrane-spanning domains permit nonselective cation uptake similar to the major facilitator superfamily of transporters Null mutant is viable, unable to uptake histidinol or Na+. Gain-of-function mutations confer non-selective cation transport and abolish translational repression by a small upstream open reading frame                                                |
| YJR012C                 |                                                                                                                                                                                                                                                                                                                                                                                                                                                                                            |
| YMR008C                 | [PLB1] Phospholipase B (lysophospholipase) involved in lipid metabolism, required for deacylation of phosphatidylcholine and phosphatidylethanolamine but not phosphatidylinositol phospholipase B (lypophospholipase) Null mutant is viable but releases greatly reduced levels of phosphatidylcholine and phosphatidylethanolamine metabolites                                                                                                                                           |
| 0155                    | GO_TERM:[ATP synthesis coupled electron transport] P-Value:1.1e-05 OVERLAP:[Succinate dehydrogenase complex (complex II)] <420.20> SIZE:4                                                                                                                                                                                                                                                                                                                                                  |
| <a href="#">YDR178W</a> | [SDH4] Membrane anchor subunit of succinate dehydrogenase (Sdh1p, Sdh2p, Sdh3p, Sdh4p), which couples the oxidation of succinate to the transfer of electrons to ubiquinone succinate dehydrogenase membrane anchor subunit Null mutant is viable, retains ability to grow on rich glycerol media                                                                                                                                                                                          |
| YPL132W                 | [COX11] Mitochondrial inner membrane protein required for delivery of copper to the Cox1p subunit of cytochrome c oxidase; association with mitochondrial ribosomes suggests that copper delivery may occur during translation of Cox1p deficient in cytochrome oxidase; sensitive to photoactivated 3-carbethoxypsoralen, UV light, radiomimetic mutagens, and oxidative stress                                                                                                           |
| <a href="#">YKL141W</a> | [SDH3] Cytochrome b subunit of succinate dehydrogenase (Sdh1p, Sdh2p, Sdh3p, Sdh4p), which couples the oxidation of succinate to the transfer of electrons to ubiquinone succinate dehydrogenase cytochrome b Null mutant is viable, has impaired mitochondrial function, fails to grow on non-fermentable carbon sources                                                                                                                                                                  |
| YOL073C                 |                                                                                                                                                                                                                                                                                                                                                                                                                                                                                            |
| YOR065W                 | [CYT1] Cytochrome c1, component of the mitochondrial respiratory chain; expression is regulated by the heme-activated, glucose-repressed Hap2p/3p/4p/5p CCAAT-binding complex cytochrome c1                                                                                                                                                                                                                                                                                                |
| 0156                    | GO_TERM:[mitochondrial fusion] P-Value:1.8e-08                                                                                                                                                                                                                                                                                                                                                                                                                                             |
| YKR066C                 | [CCP1] Mitochondrial cytochrome-c peroxidase; degrades reactive oxygen species in mitochondria, involved in the response to oxidative stress cytochrome c peroxidase                                                                                                                                                                                                                                                                                                                       |
| YGR101W                 | [PCP1] Mitochondrial serine protease required for the processing of various mitochondrial proteins and maintenance of mitochondrial DNA and morphology; belongs to the rhomboid-GlpG superfamily of intramembrane peptidases rhomboid protease Null: lack of Ccp1 maturation, slow growth on non-fermentable media                                                                                                                                                                         |
| YJL213W                 |                                                                                                                                                                                                                                                                                                                                                                                                                                                                                            |
| YOR211C                 | [MGM1] Mitochondrial GTPase related to dynamin, present in a complex containing Ugo1p and Fzo1p; required for normal morphology of cristae and for stability of Tim11p; homolog of human OPA1 involved in autosomal dominant optic atrophy GTP-binding domain protein related to dynamin Null mutant is viable, has a reduced number of copies of the mitochondrial chromosome per cell at each cell division, grows slowly on rich media, fails to grow on non-fermentable carbon sources |
| YBR179C                 | [FZO1] Mitochondrial integral membrane protein involved in mitochondrial fusion and maintenance of the mitochondrial genome; contains N-terminal GTPase domain Drosophila melanogaster fuzzy onions gene homolog/integral protein of the mitochondrial outer membrane; can be isolated as part of a high molecular weight complex Null mutant is viable, exhibits a petite phenotype and fragmented mitochondrial morphology                                                               |
| YDR470C                 | [UGO1] Protein of unknown function; outer membrane component of the mitochondrial fusion machinery; Ugo1p bind directly to Fzo1p and Mgm1p and thereby link these two GTPases during mitochondrial fusion outer membrane protein Null mutant is viable but defective in mitochondrial fusion. Null mutant also exhibits fragmentation of mitochondria, loss of mtDNA, and inviability on nonfermentable carbon sources.                                                                    |
| 0157                    | GO_TERM:[iron-sulfur cluster assembly] P-Value:4.5e-07                                                                                                                                                                                                                                                                                                                                                                                                                                     |
| YGR286C                 | [BIO2] Biotin synthase, catalyzes the conversion of dethiobiotin to biotin, which is the last step of the biotin biosynthesis pathway; complements E. coli bioB mutant biotin synthase                                                                                                                                                                                                                                                                                                     |

|                |                                                                                                                                                                                                                                                                                                                                                                                                                                                                                                                                                                                                                                                       |
|----------------|-------------------------------------------------------------------------------------------------------------------------------------------------------------------------------------------------------------------------------------------------------------------------------------------------------------------------------------------------------------------------------------------------------------------------------------------------------------------------------------------------------------------------------------------------------------------------------------------------------------------------------------------------------|
| YKR064W        |                                                                                                                                                                                                                                                                                                                                                                                                                                                                                                                                                                                                                                                       |
| YCL017C        | [NFS1] Cysteine desulfurase involved in iron-sulfur cluster (Fe/S) biogenesis; required for the post-transcriptional thio-modification of mitochondrial and cytoplasmic tRNAs; essential protein located predominantly in mitochondria Null mutant is inviable; spl1-1 mutant allele affects tRNA splicing                                                                                                                                                                                                                                                                                                                                            |
| YGL018C        | [JAC1] Molecular chaperone involved, with partner Ssq1p, in assembly of Fe/S clusters and in mitochondrial iron metabolism; contains a J domain typical to J-type chaperones; localizes to the mitochondrial matrix E. coli Hsc20 co-chaperone protein homolog J-protein co-chaperone family 20 kDa Null mutant is inviable; the jac1-1 mutation caused by a single amino acid deletion of Asp32 can suppress the endogenous oxygen toxicity (methionine and lysine auxotrophies) of sod1 null mutants; jac1-1 exhibits diminished rates of respiratory oxygen consumption and reduced mitochondrial aconitase and succinate dehydrogenase activities |
| YPL135W        | [ISU1] Conserved protein of the mitochondrial matrix, performs a scaffolding function during assembly of iron-sulfur clusters, interacts physically and functionally with yeast frataxin (Yfh1p); isu1 isu2 double mutant is inviable Null mutant is viable on YPD at 30 degrees C, and is synthetically lethal with isu2 null.                                                                                                                                                                                                                                                                                                                       |
| 0158           | GO_TERM:[tRNA metabolism] P-Value:8.1e-03 OVERLAP:[other respiration chain complexes] <420.60> SIZE:14                                                                                                                                                                                                                                                                                                                                                                                                                                                                                                                                                |
| YNL292W        | [PUS4] Pseudouridine synthase, catalyzes only the formation of pseudouridine-55 (Psi55), a highly conserved tRNA modification, in mitochondrial and cytoplasmic tRNAs; PUS4 overexpression leads to translational derepression of GCN4 (Gcd- phenotype) pseudouridine synthase Null mutant is viable; mutant is available that is defective in exit from late anaphase/early telophase (Raymond, Wendy E.)                                                                                                                                                                                                                                            |
| YHR011W        | [DIA4] Probable mitochondrial seryl-tRNA synthetase, mutant displays increased invasive and pseudohyphal growth Null mutant is viable and causes agar invasion in haploids, pseudohyphal growth in diploids; unable to grow on glycerol                                                                                                                                                                                                                                                                                                                                                                                                               |
| <b>YPR004C</b> |                                                                                                                                                                                                                                                                                                                                                                                                                                                                                                                                                                                                                                                       |
| 0159           | GO_TERM:[succinate dehydrogenase (ubiquinone) activity] P-Value:1.4e-05 OVERLAP:[Succinate dehydrogenase complex (complex II)] <420.20> SIZE:4                                                                                                                                                                                                                                                                                                                                                                                                                                                                                                        |
| YBR044C        | [TCM62] Protein involved in the assembly of the mitochondrial succinate dehydrogenase complex; putative chaperone chaperone (putative) Null mutant is viable but cannot grow on minimal glycerol medium and exhibits slow growth on rich glycerol medium.                                                                                                                                                                                                                                                                                                                                                                                             |
| <b>YKL148C</b> | [SDH1] Flavoprotein subunit of succinate dehydrogenase (Sdh1p, Sdh2p, Sdh3p, Sdh4p), which couples the oxidation of succinate to the transfer of electrons to ubiquinone succinate dehydrogenase flavoprotein subunit                                                                                                                                                                                                                                                                                                                                                                                                                                 |
| YDL120W        | [YFH1] Frataxin, regulates mitochondrial iron accumulation; interacts with Isu1p which promotes Fe-S cluster assembly; interacts with electron transport chain components and may influence respiration; human homolog involved in Friedrich's ataxia Null mutant is viable, grows poorly on glucose, fails to grown on respiratory substrates                                                                                                                                                                                                                                                                                                        |
| <b>YLL041C</b> | [SDH2] Iron-sulfur protein subunit of succinate dehydrogenase (Sdh1p, Sdh2p, Sdh3p, Sdh4p), which couples the oxidation of succinate to the transfer of electrons to ubiquinone succinate dehydrogenase (ubiquinone) iron-sulfur protein subunit                                                                                                                                                                                                                                                                                                                                                                                                      |
| 0160           | GO_TERM:[microtubule-based process] P-Value:2.0e-02 OVERLAP:[Tubulin-associated proteins] <140.30.20> SIZE:14                                                                                                                                                                                                                                                                                                                                                                                                                                                                                                                                         |
| YLR387C        | [REH1] Protein of unknown function, similar to Rei1p but not involved in bud growth; contains dispersed C2H2 zinc finger domains                                                                                                                                                                                                                                                                                                                                                                                                                                                                                                                      |
| YOL056W        | [GPM3] Homolog of Gpm1p phosphoglycerate mutase which converts 3-phosphoglycerate to 2-phosphoglycerate in glycolysis; may be non-functional derivative of a gene duplication event phosphoglycerate mutase Null mutant is viable, gpm3 gpm2 double deletion mutants exhibit no synthetic phenotypes                                                                                                                                                                                                                                                                                                                                                  |
| YDL117W        | [CYK3] SH3-domain protein located in the mother-bud neck and the cytokinetic actin ring; mutant phenotype and genetic interactions suggest a role in cytokinesis Null mutant is viable, exhibits slow growth, mild cytokinesis defects, and aberrant mother-bud neck morphology. cyk3/hof1 and cyk3/myo1 double mutants are inviable                                                                                                                                                                                                                                                                                                                  |
| <b>YPL241C</b> | [CIN2] Tubulin folding factor C (putative) involved in beta-tubulin (Tub2p) folding; isolated as mutant with increased chromosome loss and sensitivity to benomyl tubulin folding cofactor C Null mutant is viable but shows supersensitivity to benomyl and nocodazole, cold sensitivity, defects in karyogamy, and increased rates of chromosome loss; shows genetic interaction with tubulin mutations                                                                                                                                                                                                                                             |
| YHR141C        | [RPL42B] Protein component of the large (60S) ribosomal subunit, identical to Rpl42Ap and has similarity to rat L44; required for propagation of the killer toxin-encoding M1 double-stranded RNA satellite of the L-A double-stranded RNA virus ribosomal protein L42B (YL27) (L41B) (YP44) Deficient in maintenance of killer. The mak18-1 mutant allele is deficient in 60S ribosomal subunits.                                                                                                                                                                                                                                                    |
| <b>YMR138W</b> | [CIN4] GTP-binding protein involved in beta-tubulin (Tub2p) folding; isolated as mutant with increased chromosome loss and sensitivity to benomyl GTP-binding protein Null mutant is viable; supersensitivity to benomyl and nocodazole                                                                                                                                                                                                                                                                                                                                                                                                               |
| 0161           | GO_TERM:[mitochondrion] P-Value:4.2e-03                                                                                                                                                                                                                                                                                                                                                                                                                                                                                                                                                                                                               |
| YLR091W        |                                                                                                                                                                                                                                                                                                                                                                                                                                                                                                                                                                                                                                                       |
| YDR065W        |                                                                                                                                                                                                                                                                                                                                                                                                                                                                                                                                                                                                                                                       |
| YPR116W        |                                                                                                                                                                                                                                                                                                                                                                                                                                                                                                                                                                                                                                                       |
| YJL023C        | [PET130] Protein required for respiratory growth                                                                                                                                                                                                                                                                                                                                                                                                                                                                                                                                                                                                      |
| YHR054C        |                                                                                                                                                                                                                                                                                                                                                                                                                                                                                                                                                                                                                                                       |
| YML091C        | [RPM2] Protein component of mitochondrial RNase P, along with the mitochondrially-encoded RNA subunit RPM1; RNase P removes 5' extensions from tRNA precursors; Rpm2p is also involved in maturation of RPM1 and in translation of mitochondrial mRNAs mitochondrial RNase P subunit Null mutant is viable, respiratory deficient, accumulate mitochondrial tRNA precursors with 5' extensions, arrest after 25 generations on fermentable media. Spontaneous mutations that suppress arrest occur at approx 9E-6. Resultant mutants do not grow on nonfermentable carbon sources.                                                                    |
| 0162           | GO_TERM:[endoplasmic reticulum] P-Value:2.5e-02                                                                                                                                                                                                                                                                                                                                                                                                                                                                                                                                                                                                       |

|                         |                                                                                                                                                                                                                                                                                                                                                                                                                                                                                                                                                                                                                                                                                                                                     |
|-------------------------|-------------------------------------------------------------------------------------------------------------------------------------------------------------------------------------------------------------------------------------------------------------------------------------------------------------------------------------------------------------------------------------------------------------------------------------------------------------------------------------------------------------------------------------------------------------------------------------------------------------------------------------------------------------------------------------------------------------------------------------|
| YDL121C                 |                                                                                                                                                                                                                                                                                                                                                                                                                                                                                                                                                                                                                                                                                                                                     |
| YMR305C                 | [SCW10] Cell wall protein with similarity to glucanases; may play a role in conjugation during mating based on mutant phenotype and its regulation by Ste12p soluble cell wall protein                                                                                                                                                                                                                                                                                                                                                                                                                                                                                                                                              |
| 0163                    |                                                                                                                                                                                                                                                                                                                                                                                                                                                                                                                                                                                                                                                                                                                                     |
| YML042W                 | [CAT2] Carnitine acetyl-CoA transferase present in both mitochondria and peroxisomes, transfers activated acetyl groups to carnitine to form acetylcarnitine which can be shuttled across membranes carnitine O-acetyltransferase Null mutant is viable; cat2 cit2 double mutants cannot grow on oleate.                                                                                                                                                                                                                                                                                                                                                                                                                            |
| YNL046W                 |                                                                                                                                                                                                                                                                                                                                                                                                                                                                                                                                                                                                                                                                                                                                     |
| 0164                    | GO_TERM:[GET complex] P-Value:1.7e-08                                                                                                                                                                                                                                                                                                                                                                                                                                                                                                                                                                                                                                                                                               |
| YMR038C                 | [CCS1] Copper chaperone for superoxide dismutase Sod1p, involved in oxidative stress protection; Met-X-Cys-X2-Cys motif within the N-terminal portion is involved in insertion of copper into Sod1p under conditions of copper deprivation copper chaperone Null mutant is viable, methionine and lysine auxotroph, pH and temperature sensitive; sensitive to superoxide generating drugs and light irradiation, exhibits diminution of calcineurin activity                                                                                                                                                                                                                                                                       |
| YER083C                 | [GET2] Subunit of the GET complex; required for meiotic nuclear division and for the retrieval of HDEL proteins from the Golgi to the ER in an ERD2 dependent fashion; may be involved in cell wall function null is hypersensitive to calcofluor white suffer an increased spheroplast lysis rate                                                                                                                                                                                                                                                                                                                                                                                                                                  |
| YGL020C                 | [GET1] Subunit of the GET complex; required for the retrieval of HDEL proteins from the Golgi to the ER in an ERD2 dependent fashion and for normal mitochondrial morphology and inheritance Null: Required for spore wall formation, but not IME1 induction or nuclear division                                                                                                                                                                                                                                                                                                                                                                                                                                                    |
| YJL153C                 | [INO1] Inositol 1-phosphate synthase, involved in synthesis of inositol phosphates and inositol-containing phospholipids; transcription is coregulated with other phospholipid biosynthetic genes by Ino2p and Ino4p, which bind the UASINO DNA element L-myo-inositol-1-phosphate synthase Null mutant is viable, inositol auxotroph                                                                                                                                                                                                                                                                                                                                                                                               |
| YDR513W                 | [GRX2] Cytoplasmic glutaredoxin, thioltransferase, glutathione-dependent disulfide oxidoreductase involved in maintaining redox state of target proteins, also exhibits glutathione peroxidase activity, expression induced in response to stress EC 1.20.4.1 glutaredoxin thioltransferase glutathione reductase                                                                                                                                                                                                                                                                                                                                                                                                                   |
| YOL159C                 |                                                                                                                                                                                                                                                                                                                                                                                                                                                                                                                                                                                                                                                                                                                                     |
| YDL100C                 | [GET3] ATPase, subunit of the GET complex; required for the retrieval of HDEL proteins from the Golgi to the ER in an ERD2 dependent fashion; involved in resistance to heat and metal stress Null: YDL100c gene disruption results in sensitivity to As(III), As(V), Co(II) and Cu(II).                                                                                                                                                                                                                                                                                                                                                                                                                                            |
| YPL252C                 | [YAH1] Ferredoxin of the mitochondrial matrix required for formation of cellular iron-sulfur proteins; involved in heme A biosynthesis; homologous to human adrenodoxin iron-sulfur protein similar to human adrenodoxin                                                                                                                                                                                                                                                                                                                                                                                                                                                                                                            |
| 0165                    | GO_TERM:[Group I intron splicing] P-Value:3.6e-05                                                                                                                                                                                                                                                                                                                                                                                                                                                                                                                                                                                                                                                                                   |
| YOL052C                 | [SPE2] S-adenosylmethionine decarboxylase, required for the biosynthesis of spermidine and spermine; cells lacking Spe2p require spermine or spermidine for growth in the presence of oxygen but not when grown anaerobically Null mutant is viable under anaerobic conditions, under aerobic conditions, spe2 null mutants demonstrate an absolute requirement for polyamines for growth and exhibit increase in cell size, a marked decrease in budding, accumulation of vesicle-like bodies, absence of specific localization of chitin-like material, and abnormal distribution of actin-like material; in addition, spe2 null mutants are associated with a marked elevation in +1 but no change in -1 ribosomal frameshifting |
| Q0115                   | [BI3] Mitochondrial mRNA maturase, forms a complex with Mrs1p to mediate splicing of the bI3 intron of the COB gene; encoded by both exon and intron sequences of partially processed COB mRNA mRNA maturase bI3                                                                                                                                                                                                                                                                                                                                                                                                                                                                                                                    |
| YIR021W                 | [MRS1] Protein required for the splicing of two mitochondrial group I introns (BI3 in COB and AI5beta in COX1); forms a splicing complex, containing four subunits of Mrs1p and two subunits of the BI3-encoded maturase, that binds to the BI3 RNA Null mutant is viable, Pet-, exhibits accumulation of mitochondrial RNA precursors                                                                                                                                                                                                                                                                                                                                                                                              |
| 0166                    | OVERLAP:[Cytochrome bc1 complex (Ubiquinol-cytochrome c reductase complex, complex III)] <420.30> SIZE:10                                                                                                                                                                                                                                                                                                                                                                                                                                                                                                                                                                                                                           |
| YER028C                 | [MIG3] Probable transcriptional repressor involved in response to toxic agents such as hydroxyurea that inhibit ribonucleotide reductase; phosphorylation by Snf1p or the Mec1p pathway inactivates Mig3p, allowing induction of damage response genes DNA binding transcription co-repressor Multicopy inhibitor of growth during genotoxic stress in snf1 mutants                                                                                                                                                                                                                                                                                                                                                                 |
| <a href="#">YJL166W</a> | [QCR8] Subunit 8 of ubiquinol cytochrome-c reductase complex, which is a component of the mitochondrial inner membrane electron transport chain; oriented facing the intermembrane space; expression is regulated by Abf1p and Cpf1p ubiquinol cytochrome C reductase subunit 8 (11 kDa)                                                                                                                                                                                                                                                                                                                                                                                                                                            |
| YDR461W                 | [MFA1] Mating pheromone a-factor, made by a cells; interacts with alpha cells to induce cell cycle arrest and other responses leading to mating; biogenesis involves C-terminal modification, N-terminal proteolysis, and export; also encoded by MFA2 a-factor mating pheromone precursor                                                                                                                                                                                                                                                                                                                                                                                                                                          |
| YHR022C                 |                                                                                                                                                                                                                                                                                                                                                                                                                                                                                                                                                                                                                                                                                                                                     |
| YPL183C                 |                                                                                                                                                                                                                                                                                                                                                                                                                                                                                                                                                                                                                                                                                                                                     |
| YBR061C                 | [TRM7] 2'-O-ribose methyltransferase, methylates the 2'-O-ribose of nucleotides at positions 32 and 34 of the tRNA anticodon loop 2'-O-ribose tRNA anticodon loop methyltransferase Null: slow-growth, translation is impaired, sensitive to paromomycin. Other phenotypes: Point mutation within the AdoMet-binding domain strongly affects the function of the enzyme                                                                                                                                                                                                                                                                                                                                                             |
| YGR235C                 |                                                                                                                                                                                                                                                                                                                                                                                                                                                                                                                                                                                                                                                                                                                                     |

|                  |                                                                                                                                                                                                                                                                                                                                                                                                                                                                                                                        |
|------------------|------------------------------------------------------------------------------------------------------------------------------------------------------------------------------------------------------------------------------------------------------------------------------------------------------------------------------------------------------------------------------------------------------------------------------------------------------------------------------------------------------------------------|
| 0167             | GO_TERM:[mitochondrion] P-Value:1.3e-01                                                                                                                                                                                                                                                                                                                                                                                                                                                                                |
| YER048W-A        | [ISD11] Protein required for mitochondrial iron-sulfur cluster biosynthesis                                                                                                                                                                                                                                                                                                                                                                                                                                            |
| YIL098C          | [FMC1] Mitochondrial matrix protein, required for assembly or stability at high temperature of the F1 sector of mitochondrial F1F0 ATP synthase Assembly factor of ATP synthase in heat stress Null mutant is viable and shows growth deficiency on non-fermentable carbon sources at 37 degrees C                                                                                                                                                                                                                     |
| YKL192C          | [ACP1] Mitochondrial matrix acyl carrier protein, involved in biosynthesis of octanoate, which is a precursor to lipoic acid; activated by phosphopantetheinylation catalyzed by Ppt2p acyl carrier protein The null mutant is viable but respiratory-deficient and contains only 5-10% of the wild-type amount of lipoic acid.                                                                                                                                                                                        |
| YPL163C          | [SVS1] Cell wall and vacuolar protein, required for wild-type resistance to vanadate Null mutant is viable, shows increased sensitivity to vanadate, but not other metallic ions or drugs                                                                                                                                                                                                                                                                                                                              |
| 0168             | GO_TERM:[mitochondrial envelope] P-Value:2.7e-02 OVERLAP:[F0/F1 ATP synthase (complex V)] <420.50> SIZE:18                                                                                                                                                                                                                                                                                                                                                                                                             |
| <b>Q0085</b>     | [ATP6] Mitochondrially encoded subunit 6 of the F0 sector of mitochondrial F1F0 ATP synthase, which is a large, evolutionarily conserved enzyme complex required for ATP synthesis ATP synthase subunit 6 oligomycin resistance                                                                                                                                                                                                                                                                                        |
| YLR393W          | [ATP10] Mitochondrial inner membrane protein required for assembly of the F0 sector of mitochondrial F1F0 ATP synthase, interacts genetically with ATP6 loss of rutamycin sensitivity in mitochondrial ATPase but no effect on respiratory enzymes                                                                                                                                                                                                                                                                     |
| 0169             | GO_TERM:[proton-transporting ATP synthase complex (sensu Eukaryota)] P-Value:8.4e-27 OVERLAP:[F0/F1 ATP synthase (complex V)] <420.50> SIZE:18                                                                                                                                                                                                                                                                                                                                                                         |
| <b>YPR020W</b>   | [ATP20] Subunit g of the mitochondrial F1F0 ATP synthase, which is a large enzyme complex required for ATP synthesis; associated only with the dimeric form of ATP synthase ATP synthase subunit g homolog Null mutant is viable but exhibits a reduced growth rate on respiratory substrates                                                                                                                                                                                                                          |
| <b>YDR298C</b>   | [ATP5] Subunit 5 of the stator stalk of mitochondrial F1F0 ATP synthase, which is a large, evolutionarily conserved enzyme complex required for ATP synthesis; homologous to bovine subunit OSCP (oligomycin sensitivity-conferring protein) ATP synthase subunit 5 oligomycin sensitivity-conferring protein null mutant is viable, but unable to grow on glycerol; exhibits high level of genetic instability                                                                                                        |
| <b>YPL078C</b>   | [ATP4] Subunit b of the stator stalk of mitochondrial F1F0 ATP synthase, which is a large, evolutionarily conserved enzyme complex required for ATP synthesis F(1)F(0)-ATPase complex subunit b Null mutant is viable but is oxidative phosphorylation deficient, is unable to grow on glycerol, shows an F1 loosely bound to mitochondrial membrane, lacks subunit 6 in F0, has a five times lower cytochrome oxidase activity, produces a high percentage of spontaneous rho- mutants, and is oligomycin-insensitive |
| <b>YKL016C</b>   | [ATP7] Subunit d of the stator stalk of mitochondrial F1F0 ATP synthase, which is a large, evolutionarily conserved enzyme complex required for ATP synthesis ATP synthase d subunit glycerol minus phenotype; mitochondria have no detectable oligomycin-sensitive ATPase activity; F1 loosely bound to the membranous portion                                                                                                                                                                                        |
| <b>YDR377W</b>   | [ATP17] Subunit f of the F0 sector of mitochondrial F1F0 ATP synthase, which is a large, evolutionarily conserved enzyme complex required for ATP synthesis ATP synthase subunit f No growth on glycerol                                                                                                                                                                                                                                                                                                               |
| <b>YML081C-A</b> | [ATP18] Subunit of the mitochondrial F1F0 ATP synthase, which is a large enzyme complex required for ATP synthesis; termed subunit I or subunit j; does not correspond to known ATP synthase subunits in other organisms ATP synthase associated protein Null mutant is viable, deficient in oligomycin-sensitive ATPase activity, and is unable to grow on nonfermentable carbon sources.                                                                                                                             |
| <b>YDR322C-A</b> | [TIM11] Subunit e of mitochondrial F1F0-ATPase, which is a large, evolutionarily conserved enzyme complex required for ATP synthesis; essential for the dimeric state of ATP synthase mitochondrial F1F0-ATPase subunit e                                                                                                                                                                                                                                                                                              |
| <b>Q0130</b>     | [OLI1] F0-ATP synthase subunit 9 (ATPase-associated proteolipid), encoded on the mitochondrial genome; mutation confers oligomycin resistance; expression is specifically dependent on the nuclear genes AEP1 and AEP2 ATPase-associated proteolipid F0-ATP synthase subunit 9 Loss-of-function mutants lack rutamycin-sensitive ATPase activity, are oligomycin resistant, and do not grow on nonfermentable substrates. Some alleles are resistant to venturicidin or ossamycin.                                     |
| <b>Q0080</b>     | [ATP8] Subunit 8 of the F0 sector of mitochondrial inner membrane F1-F0 ATP synthase, encoded on the mitochondrial genome ATP synthase subunit 8 Loss of respiratory function                                                                                                                                                                                                                                                                                                                                          |
| YJL180C          | [ATP12] Molecular chaperone, required for the assembly of alpha and beta subunits into the F1 sector of mitochondrial F1F0 ATP synthase greatly reduced ATPase activity; alpha and beta subunits of F1-ATPase accumulate in mitochondria as inactive aggregates                                                                                                                                                                                                                                                        |
| <b>YJR121W</b>   | [ATP2] Beta subunit of the F1 sector of mitochondrial F1F0 ATP synthase, which is a large, evolutionarily conserved enzyme complex required for ATP synthesis F(1)F(0)-ATPase complex beta subunit Mutant displays a growth defect on glycerol                                                                                                                                                                                                                                                                         |
| <b>YBL099W</b>   | [ATP1] Alpha subunit of the F1 sector of mitochondrial F1F0 ATP synthase, which is a large, evolutionarily conserved enzyme complex required for ATP synthesis F1F0-ATPase alpha subunit null mutant is viable; grows slowly on fermentable carbon sources; exhibits delayed kinetics of protein import for several mitochondrial precursors                                                                                                                                                                           |
| YNL315C          | [ATP11] Molecular chaperone, required for the assembly of alpha and beta subunits into the F1 sector of mitochondrial F1F0 ATP synthase greatly reduced ATPase activity; alpha and beta subunits of F1-ATPase accumulate in mitochondria as inactive aggregates                                                                                                                                                                                                                                                        |
| 0170             | GO_TERM:[di-, tri-valent inorganic cation transporter activity] P-Value:3.4e-03                                                                                                                                                                                                                                                                                                                                                                                                                                        |
| YDL128W          | [VCX1] Vacuolar H <sup>+</sup> /Ca <sup>2+</sup> exchanger involved in control of cytosolic Ca <sup>2+</sup> concentration; has similarity to sodium/calcium exchangers, including the bovine Na <sup>+</sup> /Ca <sup>2+</sup> ,K <sup>+</sup> antiporter vacuolar H <sup>+</sup> /Ca <sup>2+</sup> exchanger Null mutant is viable, sensitive to high Ca <sup>2+</sup> conditions                                                                                                                                    |
| YNL029C          | [KTR5] Putative mannosyltransferase involved in protein glycosylation; member of the KRE2/MNT1 mannosyltransferase family mannosyltransferase (putative)                                                                                                                                                                                                                                                                                                                                                               |

|                |                                                                                                                                                                                                                                                                                                                                                                                                                                                                                                                                                                                                                                                       |
|----------------|-------------------------------------------------------------------------------------------------------------------------------------------------------------------------------------------------------------------------------------------------------------------------------------------------------------------------------------------------------------------------------------------------------------------------------------------------------------------------------------------------------------------------------------------------------------------------------------------------------------------------------------------------------|
| YPR124W        | [CTR1] High-affinity copper transporter of the plasma membrane, mediates nearly all copper uptake under low copper conditions; transcriptionally induced at low copper levels and degraded at high copper levels copper transport protein Null mutant is viable, deficient in ferrous iron uptake                                                                                                                                                                                                                                                                                                                                                     |
| YOR311C        | [HSD1] Endoplasmic reticulum (ER)-resident membrane protein, overproduction induces enlargement of ER-like membrane structures and suppresses a temperature-sensitive sly1 mutation ER membrane protein                                                                                                                                                                                                                                                                                                                                                                                                                                               |
| YDL049C        | [KNH1] Protein with similarity to Kre9p, which is involved in cell wall beta 1,6-glucan synthesis; overproduction suppresses growth defects of a kre9 null mutant KRE9 homolog Null mutant is viable; overexpression suppresses kre9 mutation; khn1 kre9 double mutant is inviable                                                                                                                                                                                                                                                                                                                                                                    |
| YLR057W        |                                                                                                                                                                                                                                                                                                                                                                                                                                                                                                                                                                                                                                                       |
| YMR289W        | [YMR289W] 4-amino-4-deoxychorismate lyase, catalyzes the third step in para-aminobenzoic acid biosynthesis 4-amino-4-deoxychorismate lyase Null: PABA auxotrophy. Defective in 4-amino-4-deoxychorismate lyase activity.                                                                                                                                                                                                                                                                                                                                                                                                                              |
| 0171           | OVERLAP:[Casein kinase I] <120.10> SIZE:4                                                                                                                                                                                                                                                                                                                                                                                                                                                                                                                                                                                                             |
| YDR428C        |                                                                                                                                                                                                                                                                                                                                                                                                                                                                                                                                                                                                                                                       |
| <b>YER123W</b> | [YCK3] Palmitoylated, vacuolar membrane-localized casein kinase I isoform; negatively regulates vacuole fusion during hypertonic stress via phosphorylation of the HOPS complex subunit, Vps41p; shares overlapping essential functions with Hrr25p casein kinase I homolog Null mutant is viable; multiple copies suppress gcs1-induced blockage of cell proliferation from stationary phase                                                                                                                                                                                                                                                         |
| 0172           | GO_TERM:[ubiquinone metabolism] P-Value:8.3e-10                                                                                                                                                                                                                                                                                                                                                                                                                                                                                                                                                                                                       |
| YDR243C        | [PRP28] RNA helicase in the DEAD-box family, involved in RNA isomerization at the 5' splice site RNA helicase Null mutant is inviable; conditional alleles of prp28 and prp24 are synthetically lethal                                                                                                                                                                                                                                                                                                                                                                                                                                                |
| YLR037C        | [DAN2] Cell wall mannoprotein with similarity to Tir1p, Tir2p, Tir3p, and Tir4p; expressed under anaerobic conditions, completely repressed during aerobic growth putative cell wall protein                                                                                                                                                                                                                                                                                                                                                                                                                                                          |
| YLR183C        | [TOS4] Transcription factor that binds to a number of promoter regions, particularly promoters of some genes involved in pheromone response and cell cycle; potential Cdc28p substrate; expression is induced in G1 by bound SBF                                                                                                                                                                                                                                                                                                                                                                                                                      |
| YGR255C        | [COQ6] Putative flavin-dependent monooxygenase, involved in ubiquinone (Coenzyme Q) biosynthesis; located on the matrix side of the mitochondrial inner membrane monooxygenase Unable to produce ubiquinone, hypersensitivity to polyunsaturated fatty acid treatment                                                                                                                                                                                                                                                                                                                                                                                 |
| YOR125C        | [CAT5] Mitochondrial inner membrane protein directly involved in ubiquinone biosynthesis, essential for several other metabolic pathways including respiration and gluconeogenic gene activation may encode a protein involved in one or more monooxygenase or hydroxylase steps of ubiquinone biosynthesis Null mutant is viable, results in complete loss of glucose derepression affecting gluconeogenic key enzymes. Respiration, but not mitochondrial cytochrome c oxidase activity, are also affected; fails to synthesize ubiquinone                                                                                                          |
| YDR204W        | [COQ4] Protein with a role in ubiquinone (Coenzyme Q) biosynthesis, possibly functioning in stabilization of Coq7p; located on the matrix face of the mitochondrial inner membrane; component of a mitochondrial ubiquinone-synthesizing complex encodes component of the coenzyme Q biosynthetic pathway Unable to produce ubiquinone, hypersensitivity to polyunsaturated fatty acid treatment                                                                                                                                                                                                                                                      |
| YOL096C        | [COQ3] O-methyltransferase, catalyzes two different O-methylation steps in ubiquinone (Coenzyme Q) biosynthesis; component of a mitochondrial ubiquinone-synthesizing complex 3,4-dihydroxy-5-hexaprenylbenzoate methyltransferase Null mutant is viable, fails to grow on H2O2; fails to grow on glycerol                                                                                                                                                                                                                                                                                                                                            |
| 0173           | GO_TERM:[meiosis] P-Value:1.4e-01                                                                                                                                                                                                                                                                                                                                                                                                                                                                                                                                                                                                                     |
| YMR147W        |                                                                                                                                                                                                                                                                                                                                                                                                                                                                                                                                                                                                                                                       |
| YKR031C        | [SPO14] Phospholipase D, catalyzes the hydrolysis of phosphatidylcholine, producing choline and phosphatidic acid; involved in Sec14p-independent secretion; required for meiosis and spore formation; differently regulated in secretion and meiosis phospholipase D Null mutant is viable, deficient for growth on non-fermentable carbon sources; unable to catalyze hydrolysis of phosphatidylcholine; diploids are unable to sporulate; most spo14 mutant cells arrest at the binucleate stage; a small fraction proceed to the tetranucleate stage; unlike the wild type, spo14 cells can return to growth after either meiosis I or meiosis II |
| YNL196C        |                                                                                                                                                                                                                                                                                                                                                                                                                                                                                                                                                                                                                                                       |
| YGL036W        |                                                                                                                                                                                                                                                                                                                                                                                                                                                                                                                                                                                                                                                       |
| YBR057C        | [MUM2] Cytoplasmic protein essential for meiotic DNA replication and sporulation; interacts with Orc2p, which is a component of the origin recognition complex Mutant is sporulation defective and fails to perform premeiotic DNA synthesis; overexpression suppresses a TOR2 allele                                                                                                                                                                                                                                                                                                                                                                 |
| YCL055W        | [KAR4] Transcription factor required for induction of KAR3 and CIK1 during mating, also required during meiosis; exists in two forms, a slower-migrating form more abundant during vegetative growth and a faster-migrating form induced by pheromone involved in karyogamy/transcription factor Defective in pheromone-induced expression of KAR3 and CIK1; therefore, defective in nuclear fusion because of defect in microtubule-dependent movement of nuclei; also required for meiosis                                                                                                                                                          |
| YGL192W        | [IME4] Probable mRNA N6-adenosine methyltransferase that is required for IME1 transcript accumulation and for sporulation; expression is induced in starved MATa/MAT alpha diploid cells methyltransferase Homozygous mutant diploid cannot accumulate IME1 mRNA during early stages of meiosis and cannot sporulate                                                                                                                                                                                                                                                                                                                                  |
| 0174           | GO_TERM:[protein transporter activity] P-Value:6.3e-04                                                                                                                                                                                                                                                                                                                                                                                                                                                                                                                                                                                                |

|           |                                                                                                                                                                                                                                                                                                                                                                                                                                                                                                                                                              |
|-----------|--------------------------------------------------------------------------------------------------------------------------------------------------------------------------------------------------------------------------------------------------------------------------------------------------------------------------------------------------------------------------------------------------------------------------------------------------------------------------------------------------------------------------------------------------------------|
| YDL107W   | [MSS2] Peripherally bound inner membrane protein of the mitochondrial matrix, required for export of C-terminal tail of Cox2p through the inner membrane cox2 pre-mRNA splicing factor Suppression of a mitochondrial RNA splice defect; COX1 pre-mRNA processing factor                                                                                                                                                                                                                                                                                     |
| YGR062C   | [COX18] Mitochondrial inner membrane protein, required for export of the Cox2p C terminus from the mitochondrial matrix to the intermembrane space during its assembly into cytochrome c oxidase; similar to Oxa2p of <i>N. crassa</i> Null mutant is viable, respiratory deficient due to inactivity of cytochrome oxidase                                                                                                                                                                                                                                  |
| YML070W   | [DAK1] Dihydroxyacetone kinase, required for detoxification of dihydroxyacetone (DHA); involved in stress adaptation dihydroxyacetone kinase Null mutant is viable and shows no growth defect in normal medium; mutant lacking both dak1 and dak2 is sensitive to dihydroxyacetone during saline growth                                                                                                                                                                                                                                                      |
| YOR266W   | [PNT1] Mitochondrial inner membrane protein involved in export of proteins from the mitochondrial matrix; overexpression of PNT1 confers resistance to the anti-Pneumocystis carinii drug pentamidine, and deletion confers increased sensitivity Null mutant is viable and shows slightly increased susceptibility to pentamidine (an anti-Pneumocystis carinii drug) and related compounds; confers resistance to pentamidine when present in high copy number                                                                                             |
| 0175      | GO_TERM:[lyase activity] P-Value:5.7e-03                                                                                                                                                                                                                                                                                                                                                                                                                                                                                                                     |
| YOR288C   | [MPD1] Member of the protein disulfide isomerase (PDI) family; interacts with and inhibits the chaperone activity of Cne1p; MPD1 overexpression in a pdi1 null mutant suppresses defects in Pdi1p functions such as carboxypeptidase Y maturation disulfide isomerase related protein Null mutant is viable. MPD1 overexpression can suppress the maturation defect of carboxypeptidase Y caused by PDI1 deletion                                                                                                                                            |
| YPR085C   |                                                                                                                                                                                                                                                                                                                                                                                                                                                                                                                                                              |
| YNL159C   | [ASI2] Predicted membrane protein; genetic interactions suggest a role in negative regulation of amino acid uptake                                                                                                                                                                                                                                                                                                                                                                                                                                           |
| YOR393W   | [ERR1] Protein of unknown function, has similarity to enolases enolase homolog                                                                                                                                                                                                                                                                                                                                                                                                                                                                               |
| YHR045W   |                                                                                                                                                                                                                                                                                                                                                                                                                                                                                                                                                              |
| YOR128C   | [ADE2] Phosphoribosylaminoimidazole carboxylase, catalyzes a step in the 'de novo' purine nucleotide biosynthetic pathway; red pigment accumulates in mutant cells deprived of adenine phosphoribosylamino-imidazole-carboxylase Null mutant is viable and requires adenine. ade2 mutants are blocked at a stage in the adenine biosynthetic pathway that causes an intermediate to accumulate in the vacuole; the intermediate gives the cell a red color.                                                                                                  |
| 0176      | GO_TERM:[transcription from RNA polymerase II promoter] P-Value:2.5e-01                                                                                                                                                                                                                                                                                                                                                                                                                                                                                      |
| YLR125W   |                                                                                                                                                                                                                                                                                                                                                                                                                                                                                                                                                              |
| YMR030W   | [RSF1] Protein required for respiratory growth; localized to both the nucleus and mitochondrion; mutant displays decreased transcription of specific nuclear and mitochondrial genes whose products are involved in respiratory growth                                                                                                                                                                                                                                                                                                                       |
| YDL110C   | [TMA17] Protein of unknown function that associates with ribosomes                                                                                                                                                                                                                                                                                                                                                                                                                                                                                           |
| YGR057C   | [LST7] Protein possibly involved in a post-Golgi secretory pathway; required for the transport of nitrogen-regulated amino acid permease Gap1p from the Golgi to the cell surface Reduced activity of the nitrogen-regulated permeases Gap1p and Put4p                                                                                                                                                                                                                                                                                                       |
| YKL015W   | [PUT3] Transcriptional activator of proline utilization genes, constitutively binds PUT1 and PUT2 promoter sequences and undergoes a conformational change to form the active state; has a Zn(2)-Cys(6) binuclear cluster domain zinc finger transcription factor of the Zn(2)-Cys(6) binuclear cluster domain type null is unable to use proline as sole nitrogen source due to deficient expression of PUT genes; mutants lacking C-terminal 76 codons show constitutive expression of PUT genes; other mutants show non-inducible expression of PUT genes |
| 0177      | GO_TERM:[retrotransposon nucleocapsid] P-Value:1.7e-20                                                                                                                                                                                                                                                                                                                                                                                                                                                                                                       |
| YJR028W   |                                                                                                                                                                                                                                                                                                                                                                                                                                                                                                                                                              |
| YLR227W-A |                                                                                                                                                                                                                                                                                                                                                                                                                                                                                                                                                              |
| YJR026W   |                                                                                                                                                                                                                                                                                                                                                                                                                                                                                                                                                              |
| YML040W   |                                                                                                                                                                                                                                                                                                                                                                                                                                                                                                                                                              |
| YLR256W-A |                                                                                                                                                                                                                                                                                                                                                                                                                                                                                                                                                              |
| YBL005W-A |                                                                                                                                                                                                                                                                                                                                                                                                                                                                                                                                                              |
| YNL284C-B |                                                                                                                                                                                                                                                                                                                                                                                                                                                                                                                                                              |
| YDL106C   | [PHO2] Homeobox transcription factor; regulatory targets include genes involved in phosphate metabolism; binds cooperatively with Pho4p to the PHO5 promoter; phosphorylation of Pho2p facilitates interaction with Pho4p homeobox transcription factor positive regulator of PHO5 and other genes The null mutant is viable but unable to sporulate. Many genes regulated by GRF10 are expressed at non-wild type levels in GRF10 null mutants.                                                                                                             |
| YMR045C   |                                                                                                                                                                                                                                                                                                                                                                                                                                                                                                                                                              |
| YDR210W-B |                                                                                                                                                                                                                                                                                                                                                                                                                                                                                                                                                              |
| YDR034C-D |                                                                                                                                                                                                                                                                                                                                                                                                                                                                                                                                                              |
| YGR161W-B |                                                                                                                                                                                                                                                                                                                                                                                                                                                                                                                                                              |

|                |                                                                                                                                                                                                                                                                                                                                                                                                                                                                                   |
|----------------|-----------------------------------------------------------------------------------------------------------------------------------------------------------------------------------------------------------------------------------------------------------------------------------------------------------------------------------------------------------------------------------------------------------------------------------------------------------------------------------|
| YOR215C        |                                                                                                                                                                                                                                                                                                                                                                                                                                                                                   |
| YBR042C        |                                                                                                                                                                                                                                                                                                                                                                                                                                                                                   |
| YLR215C        | [CDC123] Protein involved in nutritional control of the cell cycle; regulates abundance of the translation initiation factor eIF2; ortholog of human D123 protein                                                                                                                                                                                                                                                                                                                 |
| YOL103W-A      |                                                                                                                                                                                                                                                                                                                                                                                                                                                                                   |
| YHR115C        | [DMA1] Protein involved in regulating spindle position and orientation, functionally redundant with Dma2p; homolog of <i>S. pombe</i> Dma1 and <i>H. sapiens</i> Chfr                                                                                                                                                                                                                                                                                                             |
| YLR410W-B      |                                                                                                                                                                                                                                                                                                                                                                                                                                                                                   |
| 0178           | GO_TERM:[mitochondrial intermembrane space] P-Value:1.9e-07                                                                                                                                                                                                                                                                                                                                                                                                                       |
| YBR192W        | [RIM2] Mitochondrial pyrimidine nucleotide transporter; imports pyrimidine nucleoside triphosphates and exports pyrimidine nucleoside monophosphates; member of the mitochondrial carrier family Null mutant is viable but lacks mitochondrial DNA and grows slowly on glucose                                                                                                                                                                                                    |
| YER078C        |                                                                                                                                                                                                                                                                                                                                                                                                                                                                                   |
| YFL027C        | [GYP8] GTPase-activating protein for yeast Rab family members; Ypt1p is the preferred in vitro substrate but also acts on Sec4p, Ypt31p and Ypt32p; involved in the regulation of ER to Golgi vesicle transport GTPase-activating protein                                                                                                                                                                                                                                         |
| YLL009C        | [COX17] Copper metallochaperone that transfers copper to Sco1p and Cox11p for eventual delivery to cytochrome c oxidase copper chaperone Null mutant is viable, respiratory defective, rescued by addition of copper to growth media and/or high copy expression of SCO1 and SCO2 genes                                                                                                                                                                                           |
| YLL018C-A      | [COX19] Protein required for cytochrome c oxidase assembly, located in the cytosol and mitochondrial intermembrane space; putative copper metallochaperone that delivers copper to cytochrome c oxidase                                                                                                                                                                                                                                                                           |
| YGR029W        | [ERV1] Flavin-linked sulfhydryl oxidase localized to the mitochondrial intermembrane space, has a role in the maturation of cytosolic iron-sulfur proteins; ortholog of human hepatopoietin (ALR) sulfhydryl oxidase Null mutant is inviable; mutants demonstrate defects in mitochondrial biogenesis                                                                                                                                                                             |
| YKL195W        | [MIA40] Essential protein of the mitochondrial intermembrane space, involved in import and assembly of intermembrane space proteins                                                                                                                                                                                                                                                                                                                                               |
| 0179           | GO_TERM:[reproductive cellular physiological process] P-Value:6.9e-02 OVERLAP:[Actin-associated proteins] <140.20.20> SIZE:25                                                                                                                                                                                                                                                                                                                                                     |
| YDR516C        | [EMI2] Non-essential protein of unknown function required for transcriptional induction of the early meiotic-specific transcription factor IME1, also required for sporulation                                                                                                                                                                                                                                                                                                    |
| YGR169C        | [PUS6] Pseudouridine synthase responsible for modification of cytoplasmic and mitochondrial tRNAs at position 31; mutation of Asp168 to Ala abolishes enzyme activity; not essential for viability                                                                                                                                                                                                                                                                                |
| YBR040W        | [FIG1] Integral membrane protein required for efficient mating; may participate in or regulate the low affinity Ca <sup>2+</sup> influx system, which affects intracellular signaling and cell-cell fusion during mating integral membrane protein Null mutant is viable, deficient in mating                                                                                                                                                                                     |
| <b>YCL040W</b> | [GLK1] Glucokinase, catalyzes the phosphorylation of glucose at C6 in the first irreversible step of glucose metabolism; one of three glucose phosphorylating enzymes; expression regulated by non-fermentable carbon sources glucokinase                                                                                                                                                                                                                                         |
| 0180           | GO_TERM:[protein tyrosine phosphatase activity] P-Value:2.5e-04                                                                                                                                                                                                                                                                                                                                                                                                                   |
| YPL027W        | [SMA1] Protein of unknown function involved in the assembly of the prospore membrane during sporulation undergoes meiotic nuclear divisions but does not form spores                                                                                                                                                                                                                                                                                                              |
| YNL056W        | [OCA2] Cytoplasmic protein required for replication of Brome mosaic virus in <i>S. cerevisiae</i> , which is a model system for studying replication of positive-strand RNA viruses in their natural hosts                                                                                                                                                                                                                                                                        |
| YCR095C        | [YCR095C] Cytoplasmic protein required for replication of Brome mosaic virus in <i>S. cerevisiae</i> , which is a model system for studying replication of positive-strand RNA viruses in their natural hosts                                                                                                                                                                                                                                                                     |
| YNL032W        | [SIW14] Tyrosine phosphatase that plays a role in actin filament organization and endocytosis; localized to the cytoplasm tyrosine phosphatase Null mutant fails to show cell cycle arrest upon nutrient starvation, is sensitive to 5mM caffeine and 1M NaCl, and shows delocalized actin upon nutrient starvation; synthetically lethal with whi2, on minimal medium only                                                                                                       |
| YHL029C        | [YHL029C] Cytoplasmic protein required for replication of Brome mosaic virus in <i>S. cerevisiae</i> , which is a model system for studying replication of positive-strand RNA viruses in their natural hosts                                                                                                                                                                                                                                                                     |
| YNL099C        | [OCA1] Putative protein tyrosine phosphatase, required for cell cycle arrest in response to oxidative damage of DNA                                                                                                                                                                                                                                                                                                                                                               |
| 0181           | GO_TERM:[cell wall organization and biogenesis] P-Value:3.2e-02                                                                                                                                                                                                                                                                                                                                                                                                                   |
| YBR067C        | [TIP1] Major cell wall mannoprotein with possible lipase activity; transcription is induced by heat- and cold-shock; member of the Srp1p/Tip1p family of serine-alanine-rich proteins cell wall mannoprotein Null mutant is viable; exhibits increased sensitivity to calcoflour white and congo red                                                                                                                                                                              |
| YPR138C        | [MEP3] Ammonium permease of high capacity and low affinity; belongs to a ubiquitous family of cytoplasmic membrane proteins that transport only ammonium (NH <sub>4</sub> <sup>+</sup> ); expression is under the nitrogen catabolite repression regulation ammonia permease NH <sub>4</sub> <sup>+</sup> transporter Null mutant is viable. mep1 mep2 mep3 triple mutants cannot grow on media containing less than 5mM NH <sub>4</sub> <sup>+</sup> as the sole nitrogen source |
| YNL237W        | [YTP1] Probable type-III integral membrane protein of unknown function, has regions of similarity to mitochondrial electron transport proteins                                                                                                                                                                                                                                                                                                                                    |
| YGR023W        | [MTL1] Protein with both structural and functional similarity to Mid2p, which is a plasma membrane sensor required for cell integrity signaling during pheromone-induced morphogenesis; suppresses rgd1 null mutations acts in concert with Mid2p to transduce cell wall stress signals Null mutant is viable. mtl1 mutants increase severity of mid2 phenotypes                                                                                                                  |
| YLR460C        |                                                                                                                                                                                                                                                                                                                                                                                                                                                                                   |

|                |                                                                                                                                                                                                                                                                                                                                                                                                                                           |
|----------------|-------------------------------------------------------------------------------------------------------------------------------------------------------------------------------------------------------------------------------------------------------------------------------------------------------------------------------------------------------------------------------------------------------------------------------------------|
| 0182           | GO_TERM:[mitochondrial envelope] P-Value:2.6e-01                                                                                                                                                                                                                                                                                                                                                                                          |
| YOR334W        | [MRS2] Mitochondrial inner membrane Mg(2+) channel, required for maintenance of intramitochondrial Mg(2+) concentrations at the correct level to support splicing of group II introns magnesium ion transporter Null mutant is viable; has a pet- phenotype, associated with a block in mitochondrial RNA splicing of all mitochondrial group II introns                                                                                  |
| YPR151C        | [SUE1] Mitochondrial protein required for degradation of unstable forms of cytochrome c Null: Lack of degradation of abnormal cytochrome c.                                                                                                                                                                                                                                                                                               |
| YIL169C        |                                                                                                                                                                                                                                                                                                                                                                                                                                           |
| YDR503C        | [LPP1] Lipid phosphate phosphatase, catalyzes Mg(2+)-independent dephosphorylation of phosphatidic acid (PA), lysophosphatidic acid, and diacylglycerol pyrophosphate; involved in control of the cellular levels of phosphatidylinositol and PA lipid phosphate phosphatase                                                                                                                                                              |
| YNR074C        | [AIF1] Mitochondrial cell death effector that translocates to the nucleus in response to apoptotic stimuli, homolog of mammalian Apoptosis-Inducing Factor, putative reductase                                                                                                                                                                                                                                                            |
| 0183           |                                                                                                                                                                                                                                                                                                                                                                                                                                           |
| YBL107C        |                                                                                                                                                                                                                                                                                                                                                                                                                                           |
| YML116W        | [ATR1] Multidrug efflux pump of the major facilitator superfamily, required for resistance to aminotriazole and 4-nitroquinoline-N-oxide Null mutant is viable, but is sensitive to very low (5 mM) levels of aminotriazole and to 4-nitroquinoline-N-oxide (4-NQO); multiple copies of ATR1 confer hyper-resistance to 4-NQO; multiple copies of ATR1 in <i>gen4</i> background confer resistance to high (80mM) levels of aminotriazole |
| 0184           | GO_TERM:[energy derivation by oxidation of organic compounds] P-Value:5.6e-02                                                                                                                                                                                                                                                                                                                                                             |
| YIR026C        | [YVH1] Protein phosphatase involved in vegetative growth at low temperatures, sporulation, and glycogen accumulation; transcription induced by low temperature and nitrogen starvation; member of the dual-specificity family of protein phosphatases protein tyrosine phosphatase induced by nitrogen starvation                                                                                                                         |
| YDR438W        |                                                                                                                                                                                                                                                                                                                                                                                                                                           |
| YDL247W        | [MPH2] Alpha-glucoside permease, transports maltose, maltotriose, alpha-methylglucoside, and turanose; identical to Mph3p; encoded in a subtelomeric position in a region likely to have undergone duplication alpha-glucoside permease                                                                                                                                                                                                   |
| YDR034C        | [LYS14] Transcriptional activator involved in regulation of genes of the lysine biosynthesis pathway; requires 2-aminoadipate semialdehyde as co-inducer Lysine requiring                                                                                                                                                                                                                                                                 |
| YGL169W        | [SUA5] Protein required for respiratory growth; null mutation suppresses the Cyc1p translation defect caused by the presence of an aberrant ATG codon upstream of the correct start Null mutant is viable, lack cytochrome a/a3, suppresses a cyc1 mutation and confers slow growth, fails to grow on lactate or glycerol                                                                                                                 |
| 0185           | GO_TERM:[acid phosphatase activity] P-Value:1.4e-05                                                                                                                                                                                                                                                                                                                                                                                       |
| YAR071W        | [PHO11] One of three repressible acid phosphatases, a glycoprotein that is transported to the cell surface by the secretory pathway; induced by phosphate starvation and coordinately regulated by PHO4 and PHO2 acid phosphatase phosphatase deficient                                                                                                                                                                                   |
| YFR055W        | [YFR055W] Putative cystathionine beta-lyase; involved in copper ion homeostasis and sulfur metabolism; null mutant displays increased levels of spontaneous Rad52 foci                                                                                                                                                                                                                                                                    |
| YBR093C        | [PHO5] Repressible acid phosphatase (1 of 3) that also mediates extracellular nucleotide-derived phosphate hydrolysis; secretory pathway derived cell surface glycoprotein; induced by phosphate starvation and coordinately regulated by PHO4 and PHO2 acid phosphatase phosphatase deficient                                                                                                                                            |
| YKR106W        |                                                                                                                                                                                                                                                                                                                                                                                                                                           |
| 0186           | GO_TERM:[TRAPP complex] P-Value:5.3e-28 OVERLAP:[TRAPP (Transport Protein Particle) complex] <260.60> SIZE:10                                                                                                                                                                                                                                                                                                                             |
| YLL017W        |                                                                                                                                                                                                                                                                                                                                                                                                                                           |
| YOR197W        | [MCA1] Putative cysteine protease similar to mammalian caspases, involved in regulation of apoptosis upon hydrogen peroxide treatment putative cysteine protease                                                                                                                                                                                                                                                                          |
| YJR116W        |                                                                                                                                                                                                                                                                                                                                                                                                                                           |
| YGR143W        | [SKN1] Protein involved in sphingolipid biosynthesis; type II membrane protein with similarity to Kre6p highly homologous to Kre6p/type II membrane protein (putative) Null mutant is viable; exhibits no alterations in killer sensitivity, growth, or (1->6)-beta-glucan levels; skn1 kre6 double deletion mutants show a dramatic reduction in both (1->6)-beta-glucan levels and growth rate compared with either single disruptant   |
| YJL044C        | [GYP6] GTPase-activating protein (GAP) for the yeast Rab family member, Ypt6p; involved in vesicle mediated protein transport GTPase activating protein (GAP) for Ypt6                                                                                                                                                                                                                                                                    |
| <b>YGR166W</b> | [KRE11] Protein involved in biosynthesis of cell wall beta-glucans; subunit of the TRAPP (transport protein particle) complex, which is involved in the late steps of endoplasmic reticulum to Golgi transport Null mutant is viable; killer toxin resistant; reduced levels of 1,6-beta-glucan in cell wall                                                                                                                              |
| <b>YDR108W</b> | [GSG1] Subunit of TRAPP (transport protein particle), a multi-subunit complex involved in targeting and/or fusion of ER-to-Golgi transport vesicles with their acceptor compartment; protein has late meiotic role, following DNA replication                                                                                                                                                                                             |
| <b>YML077W</b> | [BET5] Component of the TRAPP (transport protein particle) complex, which plays an essential role in the vesicular transport from endoplasmic reticulum to Golgi TRAPP 18kDa component                                                                                                                                                                                                                                                    |

|                |                                                                                                                                                                                                                                                                                                                                                                                                                                                                                                              |
|----------------|--------------------------------------------------------------------------------------------------------------------------------------------------------------------------------------------------------------------------------------------------------------------------------------------------------------------------------------------------------------------------------------------------------------------------------------------------------------------------------------------------------------|
| <b>YMR218C</b> | [TRS130] One of 10 subunits of the transport protein particle (TRAPP) complex of the cis-Golgi which mediates vesicle docking and fusion; involved in ER to Golgi membrane traffic; mutation activates transcription of OCH1                                                                                                                                                                                                                                                                                 |
| <b>YDR407C</b> | [TRS120] One of 10 subunits of the transport protein particle (TRAPP) complex of the cis-Golgi which mediates vesicle docking and fusion; involved in endoplasmic reticulum (ER) to Golgi membrane traffic                                                                                                                                                                                                                                                                                                   |
| <b>YDR246W</b> | [TRS23] One of 10 subunits of the transport protein particle (TRAPP) complex of the cis-Golgi which mediates vesicle docking and fusion; involved in endoplasmic reticulum (ER) to Golgi membrane traffic; human homolog is TRAPPC4                                                                                                                                                                                                                                                                          |
| <b>YOR115C</b> | [TRS33] One of 10 subunits of the transport protein particle (TRAPP) complex of the cis-Golgi which mediates vesicle docking and fusion; involved in endoplasmic reticulum (ER) to Golgi membrane traffic                                                                                                                                                                                                                                                                                                    |
| <b>YDR472W</b> | [TRS31] One of 10 subunits of the transport protein particle (TRAPP) complex of the cis-Golgi which mediates vesicle docking and fusion; involved in endoplasmic reticulum (ER) to Golgi membrane traffic                                                                                                                                                                                                                                                                                                    |
| <b>YBR254C</b> | [TRS20] One of 10 subunits of the transport protein particle (TRAPP) complex of the cis-Golgi which mediates vesicle docking and fusion; mutations in the human homolog cause the spondyloepiphyseal dysplasia tarda (SEDL) disorder                                                                                                                                                                                                                                                                         |
| <b>YKR068C</b> | [BET3] Hydrophilic protein that acts in conjunction with SNARE proteins in targeting and fusion of ER to Golgi transport vesicles; component of the TRAPP (transport protein particle) complex transport protein particle (TRAPP) component                                                                                                                                                                                                                                                                  |
| 0187           | GO_TERM:[positive regulation of transcription from RNA polymerase II promoter] P-Value:4.8e-02                                                                                                                                                                                                                                                                                                                                                                                                               |
| YIR014W        |                                                                                                                                                                                                                                                                                                                                                                                                                                                                                                              |
| YER037W        | [PHM8] Protein of unknown function, expression is induced by low phosphate levels and by inactivation of Pho85p                                                                                                                                                                                                                                                                                                                                                                                              |
| YER052C        | [HOM3] Aspartate kinase (L-aspartate 4-P-transferase); cytoplasmic enzyme that catalyzes the first step in the common pathway for methionine and threonine biosynthesis; expression regulated by Gcn4p and the general control of amino acid synthesis aspartate kinase (L-aspartate 4-P-transferase) (EC 2.7.2.4) Homoserine requiring; Borrelidin resistance                                                                                                                                               |
| YGL071W        | [AFT1] Transcription factor involved in iron utilization and homeostasis; binds the consensus site PyPuCACCCPu and activates the expression of target genes in response to changes in iron availability binds the consensus site PyPuCACCCPu Null mutant is viable; mutant cells are larger than normal, since critical size for budding is increased; mutant shows incorrect regulation of expression of genes involved in iron uptake; spores from heterozygous diploid have reduced ability to germinate; |
| YGR168C        |                                                                                                                                                                                                                                                                                                                                                                                                                                                                                                              |
| YIR018W        | [YAP5] Basic leucine zipper (bZIP) transcription factor bZIP (basic-leucine zipper) protein transcription factor                                                                                                                                                                                                                                                                                                                                                                                             |
| 0188           | GO_TERM:[endonuclease activity] P-Value:7.6e-03 OVERLAP:[Fatty acid synthetase, cytoplasmic] <170> SIZE:2                                                                                                                                                                                                                                                                                                                                                                                                    |
| YDL234C        | [GYP7] GTPase-activating protein for yeast Rab family members including: Ypt7p (most effective), Ypt1p, Ypt31p, and Ypt32p (in vitro); involved in vesicle mediated protein trafficking GTPase activating protein (GAP)                                                                                                                                                                                                                                                                                      |
| YIL078W        | [THS1] Threonyl-tRNA synthetase, essential cytoplasmic protein threonine-tRNA ligase                                                                                                                                                                                                                                                                                                                                                                                                                         |
| <b>YPL231W</b> | [FAS2] Alpha subunit of fatty acid synthetase, which catalyzes the synthesis of long-chain saturated fatty acids; contains beta-ketoacyl reductase and beta-ketoacyl synthase activities fatty acid synthase alpha subunit Fatty acid synthetase deficient                                                                                                                                                                                                                                                   |
| YKL222C        |                                                                                                                                                                                                                                                                                                                                                                                                                                                                                                              |
| YKR079C        | [TRZ1] tRNase Z, involved in RNA processing, has two putative nucleotide triphosphate-binding motifs (P-loop) and a conserved histidine motif, homolog of the human candidate prostate cancer susceptibility gene ELAC2 tRNA 3' processing endoribonuclease                                                                                                                                                                                                                                                  |
| YJL208C        | [NUC1] Major mitochondrial nuclease, has RNase and DNA endo- and exonucleolytic activities; has a role in mitochondrial recombination nuclease                                                                                                                                                                                                                                                                                                                                                               |
| YMR099C        |                                                                                                                                                                                                                                                                                                                                                                                                                                                                                                              |
| 0189           | OVERLAP:[cytoplasmic ribosomal small subunit] <500.40.20> SIZE:57                                                                                                                                                                                                                                                                                                                                                                                                                                            |
| YKR016W        | [YKR016W] The authentic, non-tagged protein was localized to the mitochondria                                                                                                                                                                                                                                                                                                                                                                                                                                |
| <b>YLR388W</b> | [RPS29A] Protein component of the small (40S) ribosomal subunit; nearly identical to Rps29Bp and has similarity to rat S29 and E. coli S14 ribosomal proteins ribosomal protein S29A (S36A) (YS29)                                                                                                                                                                                                                                                                                                           |
| 0190           | GO_TERM:[hydrolase activity] P-Value:6.4e-02                                                                                                                                                                                                                                                                                                                                                                                                                                                                 |
| YHR047C        | [AAP1] Arginine/alanine aminopeptidase, overproduction stimulates glycogen accumulation arginine/alanine aminopeptidase null mutant is viable, decrease in glycogen accumulation                                                                                                                                                                                                                                                                                                                             |
| YBR284W        |                                                                                                                                                                                                                                                                                                                                                                                                                                                                                                              |
| YDL238C        | [GUD1] Guanine deaminase, a catabolic enzyme of the guanine salvage pathway producing xanthine and ammonia from guanine; activity is low in exponentially-growing cultures but expression is increased in post-diauxic and stationary-phase cultures guanine deaminase                                                                                                                                                                                                                                       |
| 0191           | GO_TERM:[molecular_function] P-Value:2.2e-01                                                                                                                                                                                                                                                                                                                                                                                                                                                                 |
| YDR349C        | [YPS7] Putative GPI-anchored aspartic protease, located in the cytoplasm and endoplasmic reticulum GPI-anchored aspartic protease                                                                                                                                                                                                                                                                                                                                                                            |
| YLR099C        | [ICT1] Protein of unknown function, null mutation leads to an increase in sensitivity to Calcofluor white; expression of the gene is induced in the presence of isoactane                                                                                                                                                                                                                                                                                                                                    |
| YNR050C        | [LYS9] Saccharopine dehydrogenase (NADP+, L-glutamate-forming); catalyzes the formation of saccharopine from alpha-aminoadipate 6-semialdehyde, which is the seventh step in lysine biosynthesis pathway lysine auxotroph                                                                                                                                                                                                                                                                                    |

|         |                                                                                                                                                                                                                                                                                                                                                                                                                                                                                                             |
|---------|-------------------------------------------------------------------------------------------------------------------------------------------------------------------------------------------------------------------------------------------------------------------------------------------------------------------------------------------------------------------------------------------------------------------------------------------------------------------------------------------------------------|
| YOR164C |                                                                                                                                                                                                                                                                                                                                                                                                                                                                                                             |
| YBR137W |                                                                                                                                                                                                                                                                                                                                                                                                                                                                                                             |
| YOL111C | [MDY2] Protein required for efficient mating; involved in shmoo formation and nuclear migration in the pre-zygote; associates with ribosomes and interacts with YOR164C; contains a ubiquitin-like (UBL) domain                                                                                                                                                                                                                                                                                             |
| YOR007C | [SGT2] Glutamine-rich cytoplasmic protein of unknown function, contains tetratricopeptide (TPR) repeats, which often mediate protein-protein interactions; conserved in human and <i>C. elegans</i>                                                                                                                                                                                                                                                                                                         |
| 0192    | GO_TERM:[biological_process] P-Value:3.5e-02                                                                                                                                                                                                                                                                                                                                                                                                                                                                |
| YDL199C |                                                                                                                                                                                                                                                                                                                                                                                                                                                                                                             |
| YOR037W | [CYC2] Mitochondrial peripheral inner membrane protein, contains a FAD cofactor in a domain exposed in the intermembrane space; exhibits redox activity in vitro; likely participates in ligation of heme to acytochromes c and c1 (Cyc1p and Cyt1p) Null mutant is viable. Deletion of CYC2 leads to accumulation of apocytochrome c in the cytoplasm; strains with deletions of CYC2 still import low levels of cytochrome c into mitochondria                                                            |
| YNL100W |                                                                                                                                                                                                                                                                                                                                                                                                                                                                                                             |
| YCL056C |                                                                                                                                                                                                                                                                                                                                                                                                                                                                                                             |
| YDL157C |                                                                                                                                                                                                                                                                                                                                                                                                                                                                                                             |
| 0193    |                                                                                                                                                                                                                                                                                                                                                                                                                                                                                                             |
| YLR299W | [ECM38] Gamma-glutamyltranspeptidase, major glutathione-degrading enzyme; expression induced mainly by nitrogen starvation gamma-glutamyltransferase homolog                                                                                                                                                                                                                                                                                                                                                |
| YOL137W | [BSC6] Protein of unknown function containing 8 putative transmembrane seqments; ORF exhibits genomic organization compatible with a translational readthrough-dependent mode of expression                                                                                                                                                                                                                                                                                                                 |
| 0194    | GO_TERM:[N-acetylglucosaminylidiphosphodolichol N-acetylglucosaminyltransferase activity] P-Value:2.1e-06                                                                                                                                                                                                                                                                                                                                                                                                   |
| YJL019W | [MPS3] Essential integral membrane protein required for spindle pole body duplication and for nuclear fusion, localizes to the spindle pole body half bridge, interacts with DnaJ-like chaperone Jem1p and with centrin homolog Cdc31p nuclear envelope protein Null: null mutant is inviable. Other phenotypes: ts mutants fail in SPB duplication; The temperature-sensitive nep98-7 mutant shows defects in the organization of the spindle pole body, nuclear division and nuclear fusion during mating |
| YJL073W | [JEM1] DnaJ-like chaperone required for nuclear membrane fusion during mating, localizes to the ER membrane; exhibits genetic interactions with KAR2 Null mutant is viable but has karyogamy defect; jem1 scj1 double mutant is temperature sensitive                                                                                                                                                                                                                                                       |
| YBR070C | [ALG14] Component of UDP-GlcNAc transferase required for the second step of dolichyl-linked oligosaccharide synthesis; anchors the catalytic subunit Alg13p to the ER membrane; similar to bacterial and human glycosyltransferases UDP-GlcNAc transferase associated protein                                                                                                                                                                                                                               |
| YGL047W | [ALG13] Catalytic component of UDP-GlcNAc transferase, required for the second step of dolichyl-linked oligosaccharide synthesis; anchored to the ER membrane via interaction with Alg14p; similar to bacterial and human glycosyltransferases UDP-N-acetylglucosamine transferase                                                                                                                                                                                                                          |
| 0195    | GO_TERM:[catalytic activity] P-Value:2.7e-01                                                                                                                                                                                                                                                                                                                                                                                                                                                                |
| YER073W | [ALD5] Mitochondrial aldehyde dehydrogenase, involved in regulation or biosynthesis of electron transport chain components and acetate formation; activated by K <sup>+</sup> ; utilizes NADP <sup>+</sup> as the preferred coenzyme; constitutively expressed aldehyde dehydrogenase                                                                                                                                                                                                                       |
| YGL010W |                                                                                                                                                                                                                                                                                                                                                                                                                                                                                                             |
| YPL257W |                                                                                                                                                                                                                                                                                                                                                                                                                                                                                                             |
| YBR161W | [CSH1] Probable catalytic subunit of a mannosylinositol phosphorylceramide (MIPC) synthase, forms a complex with probable regulatory subunit Csg2p; function in sphingolipid biosynthesis is overlapping with that of Sur1p Null mutant is viable, does not exhibit calcium sensitivity or alter the calcium sensitive phenotype of a sur1 null strain                                                                                                                                                      |
| YPR193C | [HPA2] Tetrameric histone acetyltransferase with similarity to Gcn5p, Hat1p, Elp3p, and Hpa3p; acetylates histones H3 and H4 in vitro and exhibits autoacetylation activity histone acetyltransferase Null mutant is viable and does not show any detectable phenotype                                                                                                                                                                                                                                      |
| YEL042W | [GDA1] Guanosine diphosphatase located in the Golgi, involved in the transport of GDP-mannose into the Golgi lumen by converting GDP to GMP after mannose is transferred its substrate guanosine diphosphatase of Golgi membrane                                                                                                                                                                                                                                                                            |
| YLR250W | [SSP120] Protein of unknown function; green fluorescent protein (GFP)-fusion protein localizes to the cytoplasm in a punctate pattern                                                                                                                                                                                                                                                                                                                                                                       |
| 0196    |                                                                                                                                                                                                                                                                                                                                                                                                                                                                                                             |
| YGL263W | [COS12] Protein of unknown function, member of the DUP380 subfamily of conserved, often subtelomerically-encoded proteins                                                                                                                                                                                                                                                                                                                                                                                   |
| YJR095W | [SFC1] Mitochondrial succinate-fumarate transporter, transports succinate into and fumarate out of the mitochondrion; required for ethanol and acetate utilization succinate-fumarate transport protein                                                                                                                                                                                                                                                                                                     |

|         |                                                                                                                                                                                                                                                                                                                                                                                                                                              |
|---------|----------------------------------------------------------------------------------------------------------------------------------------------------------------------------------------------------------------------------------------------------------------------------------------------------------------------------------------------------------------------------------------------------------------------------------------------|
| 0197    | GO_TERM:[nucleobase, nucleoside, nucleotide and nucleic acid metabolism] P-Value:3.8e-01                                                                                                                                                                                                                                                                                                                                                     |
| YER045C | [ACA1] Basic leucine zipper (bZIP) transcription factor of the ATF/CREB family, may regulate transcription of genes involved in utilization of non-optimal carbon sources                                                                                                                                                                                                                                                                    |
| YGR247W | [CPD1] Cyclic nucleotide phosphodiesterase, hydrolyzes ADP-ribose 1", 2"-cyclic phosphate to ADP-ribose 1"-phosphate; no detectable phenotype is conferred by null mutation or by overexpression 2',3'-cyclic nucleotide 3'-phosphodiesterase null: viable, no detected growth defects, defective in hydrolysis of ADP-ribose 1",2"-cyclic phosphate (Appr>p)                                                                                |
| 0198    | GO_TERM:[molecular_function] P-Value:2.9e-02                                                                                                                                                                                                                                                                                                                                                                                                 |
| YMR195W | [ICY1] Protein of unknown function, required for viability in rich media of cells lacking mitochondrial DNA                                                                                                                                                                                                                                                                                                                                  |
| YOR059C |                                                                                                                                                                                                                                                                                                                                                                                                                                              |
| YGR213C | [RTA1] Protein involved in 7-aminocholesterol resistance; has seven potential membrane-spanning regions Null mutant is viable; overexpression confers resistance to 7-aminocholesterol                                                                                                                                                                                                                                                       |
| YHR134W | [WSS1] Sumoylated protein of unknown function, identified based on genetic interactions with SMT3; UV-sensitive mutant phenotype and genetic interactions suggest a role in the DNA damage response, processing stalled or collapsed replication forks                                                                                                                                                                                       |
| 0199    |                                                                                                                                                                                                                                                                                                                                                                                                                                              |
| YER010C |                                                                                                                                                                                                                                                                                                                                                                                                                                              |
| YOR274W | [MOD5] Delta 2-isopentenyl pyrophosphate:tRNA isopentenyl transferase, required for biosynthesis of the modified base isopentenyladenosine in mitochondrial and cytoplasmic tRNAs; gene is nuclear and encodes two isozymic forms transfer RNA isopentenyl transferase Null mutant is viable but temperature sensitive and cannot grow on nonfermentable carbon sources.                                                                     |
| 0200    | GO_TERM:[molecular_function] P-Value:1.7e-01                                                                                                                                                                                                                                                                                                                                                                                                 |
| YHL043W | [ECM34] Putative protein of unknown function, member of the DUP380 subfamily of conserved, often subtelomerically-encoded proteins                                                                                                                                                                                                                                                                                                           |
| YMR232W | [FUS2] Cytoplasmic protein localized to the shmoo tip; required for the alignment of parental nuclei before nuclear fusion during mating Null mutant is viable, fus2 mutants have strong defects in karyogamy and fail to orient microtubules between parental nuclei in zygotes                                                                                                                                                             |
| 0201    | GO_TERM:[phosphotransferase activity, alcohol group as acceptor] P-Value:1.9e-02                                                                                                                                                                                                                                                                                                                                                             |
| YLR133W | [CKI1] Choline kinase, catalyzes the first step in the CDP-choline pathway phosphatidylcholine synthesis (Kennedy pathway); mRNA expression is regulated by inositol and choline, enzyme activity is stimulated by phosphorylation by protein kinase choline kinase                                                                                                                                                                          |
| YLL015W | [BPT1] ABC type transmembrane transporter of MRP/CFTR family, found in vacuolar membrane, involved in the transport of unconjugated bilirubin and in heavy metal detoxification via glutathione conjugates, along with Ycf1p ABC transporter highly homologous to human MRP1 and to C. elegans mrp-1 Null mutant is viable but lacks approximately 40% of the transport activity of unconjugated bilirubin into the vacuolar system of yeast |
| YGL021W | [ALK1] Putative Ser-Thr protein kinase, belongs to the haspin family of kinases; contains a leucine zipper motif; may function in mitosis haspin                                                                                                                                                                                                                                                                                             |
| YNR070W |                                                                                                                                                                                                                                                                                                                                                                                                                                              |
| 0202    | GO_TERM:[telomere maintenance] P-Value:7.1e-02                                                                                                                                                                                                                                                                                                                                                                                               |
| YJR003C |                                                                                                                                                                                                                                                                                                                                                                                                                                              |
| YOL030W | [GAS5] Putative 1,3-beta-glucanosyltransferase, has similarity to Gas1p; localizes to the cell wall                                                                                                                                                                                                                                                                                                                                          |
| YJR055W | [HIT1] Protein of unknown function, required for growth at high temperature no growth at high temperature; confers pet phenotype                                                                                                                                                                                                                                                                                                             |
| YPL193W | [RSA1] Protein involved in the assembly of 60S ribosomal subunits; functionally interacts with Dbp6p; functions in a late nucleoplasmic step of the assembly Null mutant is viable but shows weak, slow-growth at 30C and is temperature-sensitive at 37C; synthetically lethal with dbp6 mutation                                                                                                                                           |
| 0203    |                                                                                                                                                                                                                                                                                                                                                                                                                                              |
| YBR030W |                                                                                                                                                                                                                                                                                                                                                                                                                                              |
| YLR244C | [MAP1] Methionine aminopeptidase, catalyzes the cotranslational removal of N-terminal methionine from nascent polypeptides; function is partially redundant with that of Map2p methionine aminopeptidase                                                                                                                                                                                                                                     |
| 0204    | GO_TERM:[outer mitochondrial membrane organization and biogenesis] P-Value:1.6e-09 OVERLAP:[TOM - transport across the outer membrane] <290.10> SIZE:9                                                                                                                                                                                                                                                                                       |

|         |                                                                                                                                                                                                                                                                                                                                                                                                                                                                                                                                                                                                                                                                                                         |
|---------|---------------------------------------------------------------------------------------------------------------------------------------------------------------------------------------------------------------------------------------------------------------------------------------------------------------------------------------------------------------------------------------------------------------------------------------------------------------------------------------------------------------------------------------------------------------------------------------------------------------------------------------------------------------------------------------------------------|
| YNL026W | [SAM50] Essential component of the Sorting and Assembly Machinery (SAM or Tob complex) of the mitochondrial outer membrane, which binds precursors of beta-barrel proteins and facilitates their outer membrane insertion; homologous to bacterial Omp85                                                                                                                                                                                                                                                                                                                                                                                                                                                |
| YHR083W | [SAM35] Essential component of the sorting and assembly machinery (SAM complex or TOB complex) of the mitochondrial outer membrane, which binds precursors of beta-barrel proteins and facilitates their insertion into the outer membrane                                                                                                                                                                                                                                                                                                                                                                                                                                                              |
| YMR060C | [SAM37] Component of the mitochondrial outer membrane sorting and assembly machinery (SAM) complex; required for the sorting of some proteins to the outer membrane after import by the TOM complex mitochondrial SAM complex constituent Null mutant is viable, temperature-sensitive for respiration driven growth, fails to import precursors into isolated mitochondria, exhibits double mutant inviability with strains deleted for TOM70 or TOM20.                                                                                                                                                                                                                                                |
| 0205    | GO_TERM:[catalytic activity] P-Value:4.4e-03                                                                                                                                                                                                                                                                                                                                                                                                                                                                                                                                                                                                                                                            |
| YER069W | [ARG5,6] Protein that is processed in the mitochondrion to yield acetylglutamate kinase and N-acetyl-gamma-glutamyl-phosphate reductase, which catalyze the 2nd and 3rd steps in arginine biosynthesis; enzymes form a complex with Arg2p N-acetyl-gamma-glutamyl-phosphate reductase acetylglutamate kinase Arginine requiring                                                                                                                                                                                                                                                                                                                                                                         |
| YLR214W | [FRE1] Ferric reductase and cupric reductase, reduces siderophore-bound iron and oxidized copper prior to uptake by transporters; expression induced by low copper and iron levels cupric reductase ferric reductase Null mutant is viable, fre1-1 mutants are deficient in the uptake of ferric iron and are extremely sensitive to iron deprivation                                                                                                                                                                                                                                                                                                                                                   |
| YLL062C | [MHT1] S-methylmethionine-homocysteine methyltransferase, functions along with Sam4p in the conversion of S-adenosylmethionine (AdoMet) to methionine to control the methionine/AdoMet ratio S-Methylmethionine Homocysteine methylTransferase Does not use S-methylmethionine as a sulfur source                                                                                                                                                                                                                                                                                                                                                                                                       |
| YKR104W |                                                                                                                                                                                                                                                                                                                                                                                                                                                                                                                                                                                                                                                                                                         |
| YOL143C | [RIB4] Lumazine synthase (6,7-dimethyl-8-ribityllumazine synthase, also known as DMRL synthase); catalyzes synthesis of immediate precursor to riboflavin 6,7-dimethyl-8-ribityllumazine synthase (DMRL synthase) Null mutant is viable but is a riboflavin auxotroph                                                                                                                                                                                                                                                                                                                                                                                                                                   |
| 0206    | GO_TERM:[cell wall organization and biogenesis] P-Value:4.1e-02                                                                                                                                                                                                                                                                                                                                                                                                                                                                                                                                                                                                                                         |
| YOL011W | [PLB3] Phospholipase B (lysophospholipase) involved in phospholipid metabolism; hydrolyzes phosphatidylinositol and phosphatidylserine and displays transacylase activity in vitro phospholipase B (lysophospholipase)                                                                                                                                                                                                                                                                                                                                                                                                                                                                                  |
| YOL105C | [WSC3] Partially redundant sensor-transducer of the stress-activated PKC1-MPK1 signaling pathway involved in maintenance of cell wall integrity; involved in the response to heat shock and other stressors; regulates 1,3-beta-glucan synthesis contains novel cysteine motif integral membrane protein (putative) similar to SLG1 (WSC1), WSC2 and WSC4 Null mutant is viable and shows no phenotypes; slg1 (wsc1)-null WSC3-null double mutant shows a lysis defect on YPD at room temperature and heat shock sensitivity; overexpression of WSC genes suppresses heat shock sensitivity of hyperactivated ras mutant; heat shock sensitivity of wsc mutant strain is suppressed by deletion of ras2 |
| YBR101C | [FES1] Hsp70 (Ssa1p) nucleotide exchange factor, cytosolic homolog of Sil1p, which is the nucleotide exchange factor for BiP (Kar2p) in the endoplasmic reticulum Hsp70 nucleotide exchange factor Null mutant is thermosensitive. Other phenotypes: cycloheximide sensitive.                                                                                                                                                                                                                                                                                                                                                                                                                           |
| YLR194C |                                                                                                                                                                                                                                                                                                                                                                                                                                                                                                                                                                                                                                                                                                         |
| YNL050C |                                                                                                                                                                                                                                                                                                                                                                                                                                                                                                                                                                                                                                                                                                         |
| 0207    |                                                                                                                                                                                                                                                                                                                                                                                                                                                                                                                                                                                                                                                                                                         |
| YMR118C |                                                                                                                                                                                                                                                                                                                                                                                                                                                                                                                                                                                                                                                                                                         |
| YPL134C | [ODC1] Mitochondrial inner membrane transporter, exports 2-oxoadipate and 2-oxoglutarate from the mitochondrial matrix to the cytosol for use in lysine and glutamate biosynthesis and in lysine catabolism mitochondrial 2-oxodicarboxylate transport protein                                                                                                                                                                                                                                                                                                                                                                                                                                          |
| 0208    | GO_TERM:[coenzyme biosynthesis] P-Value:3.9e-02                                                                                                                                                                                                                                                                                                                                                                                                                                                                                                                                                                                                                                                         |
| YGR277C |                                                                                                                                                                                                                                                                                                                                                                                                                                                                                                                                                                                                                                                                                                         |
| YPL060W | [LPE10] Mitochondrial inner membrane magnesium transporter, involved in maintenance of magnesium concentrations inside mitochondria; indirectly affects splicing of group II introns; functionally and structurally related to Mrs2p                                                                                                                                                                                                                                                                                                                                                                                                                                                                    |
| YHR057C | [CPR2] Peptidyl-prolyl cis-trans isomerase (cyclophilin), catalyzes the cis-trans isomerization of peptide bonds N-terminal to proline residues; has a potential role in the secretory pathway cyclophilin peptidyl-prolyl cis-trans isomerase (PPIase) Null mutant is viable; sensitive to heat                                                                                                                                                                                                                                                                                                                                                                                                        |
| YNR041C | [COQ2] Para hydroxybenzoate: polyprenyl transferase, catalyzes the second step in ubiquinone (coenzyme Q) biosynthesis para hydroxybenzoate: polyprenyl transferase Null mutant is viable but is respiratory defective and lacks PHB:polyprenyltransferase activity                                                                                                                                                                                                                                                                                                                                                                                                                                     |
| YEL006W | [YEA6] Putative mitochondrial NAD <sup>+</sup> transporter, member of the mitochondrial carrier subfamily (see also YIA6); has putative human ortholog NAD <sup>+</sup> transporter                                                                                                                                                                                                                                                                                                                                                                                                                                                                                                                     |
| YPL107W |                                                                                                                                                                                                                                                                                                                                                                                                                                                                                                                                                                                                                                                                                                         |
| YDR317W | [HIM1] Protein of unknown function involved in DNA repair                                                                                                                                                                                                                                                                                                                                                                                                                                                                                                                                                                                                                                               |
| YLR373C | [VID22] Glycosylated integral membrane protein localized to the plasma membrane; plays a role in fructose-1,6-bisphosphatase (FBPase) degradation; involved in FBPase transport from the cytosol to Vid (vacuole import and degradation) vesicles Null mutant is viable but exhibits vacuole degradation of cytosolic proteins                                                                                                                                                                                                                                                                                                                                                                          |

|                |                                                                                                                                                                                                                                                                                                                                                                                                                                                                                                                                                                                                                                                                                                     |
|----------------|-----------------------------------------------------------------------------------------------------------------------------------------------------------------------------------------------------------------------------------------------------------------------------------------------------------------------------------------------------------------------------------------------------------------------------------------------------------------------------------------------------------------------------------------------------------------------------------------------------------------------------------------------------------------------------------------------------|
| 0209           | GO_TERM:[transposition, RNA-mediated] P-Value:7.0e-07                                                                                                                                                                                                                                                                                                                                                                                                                                                                                                                                                                                                                                               |
| YER159C-A      |                                                                                                                                                                                                                                                                                                                                                                                                                                                                                                                                                                                                                                                                                                     |
| YPR158W-A      |                                                                                                                                                                                                                                                                                                                                                                                                                                                                                                                                                                                                                                                                                                     |
| YIL145C        | [PAN6] Pantothenate synthase, also known as pantoate-beta-alanine ligase, required for pantothenic acid biosynthesis, deletion causes pantothenic acid auxotrophy, homologous to E. coli panC pantothenate synthase Null mutant is viable and shows pantothenate auxotrophy                                                                                                                                                                                                                                                                                                                                                                                                                         |
| YOL103W-B      |                                                                                                                                                                                                                                                                                                                                                                                                                                                                                                                                                                                                                                                                                                     |
| YOR142W-A      |                                                                                                                                                                                                                                                                                                                                                                                                                                                                                                                                                                                                                                                                                                     |
| 0210           | GO_TERM:[tRNA methyltransferase activity] P-Value:8.0e-08                                                                                                                                                                                                                                                                                                                                                                                                                                                                                                                                                                                                                                           |
| YML014W        | [TRM9] tRNA methyltransferase, catalyzes the esterification of modified uridine nucleotides in tRNAs, creating 5-methylcarboxymethyluridine in tRNA(Arg3) and 5-methylcarboxymethyl-2-thiouridine in tRNA(Glu); may have a role in stress response mcm5U/mcm5s2U tRNA carboxyl methyltransferase                                                                                                                                                                                                                                                                                                                                                                                                    |
| YNR046W        | [TRM112] Subunit of an adoMet-dependent tRNA methyltransferase (MTase) complex (Trm11p-Trm112p), required for the methylation of the guanosine nucleotide at position 10 (m2G10) in tRNAs; putative zinc binding subunit of other MTase-related proteins                                                                                                                                                                                                                                                                                                                                                                                                                                            |
| YOL124C        | [TRM11] Catalytic subunit of an adoMet-dependent tRNA methyltransferase complex (Trm11p-Trm112p), required for the methylation of the guanosine nucleotide at position 10 (m2G10) in tRNAs; contains a THUMP domain and a methyltransferase domain N2-monomethylguanosine-specific tRNA methyltransferase                                                                                                                                                                                                                                                                                                                                                                                           |
| 0211           | GO_TERM:[regulation of transcription, mating-type specific] P-Value:1.9e-11                                                                                                                                                                                                                                                                                                                                                                                                                                                                                                                                                                                                                         |
| YCL066W        | [HMLALPHA1] Silenced copy of ALPHA1 at HML, encoding a transcriptional coactivator involved in the regulation of mating-type alpha-specific gene expression involved in the regulation of alpha-specific genes transcription factor                                                                                                                                                                                                                                                                                                                                                                                                                                                                 |
| YCL067C        | [HMLALPHA2] Silenced copy of ALPHA2 at HML; homeobox-domain protein that associates with Mcm1p in haploid cells to repress a-specific gene expression and interacts with a1p in diploid cells to repress haploid-specific gene expression                                                                                                                                                                                                                                                                                                                                                                                                                                                           |
| YCR039C        | [MATALPHA2] Homeobox-domain protein that, with Mcm1p, represses a-specific genes in haploids; acts with A1p to repress transcription of haploid-specific genes in diploids; one of two genes encoded by the MATalpha mating type cassette                                                                                                                                                                                                                                                                                                                                                                                                                                                           |
| YCR097W        | [HMRA1] Silenced copy of a1 at HMR; homeobox corepressor that interacts with Alpha2p to repress haploid-specific gene transcription in diploid cells homeobox transcription factor Null mutant is viable; deletion of the expressed copy of A1 causes mating defect; diploids in which the expressed copy of a1 is mutated cannot undergo meiosis and sporulation                                                                                                                                                                                                                                                                                                                                   |
| 0212           | GO_TERM:[regulation of transcription from RNA polymerase II promoter] P-Value:7.3e-07 OVERLAP:[ARG complex] <510.190.120> SIZE:4                                                                                                                                                                                                                                                                                                                                                                                                                                                                                                                                                                    |
| YML027W        | [YOX1] Homeodomain-containing transcriptional repressor, binds to Mcm1p and to early cell cycle boxes (ECBs) in the promoters of cell cycle-regulated genes expressed in M/G1 phase; expression is cell cycle-regulated; potential Cdc28p substrate homeobox-domain containing protein                                                                                                                                                                                                                                                                                                                                                                                                              |
| YDR451C        | [YHP1] One of two homeobox transcriptional repressors (see also Yox1p), that bind to Mcm1p and to early cell cycle box (ECB) elements of cell cycle regulated genes, thereby restricting ECB-mediated transcription to the M/G1 interval                                                                                                                                                                                                                                                                                                                                                                                                                                                            |
| YOR087W        | [YVC1] Vacuolar cation channel, mediates release of Ca(2+) from the vacuole in response to hyperosmotic shock                                                                                                                                                                                                                                                                                                                                                                                                                                                                                                                                                                                       |
| YCR040W        | [MATALPHA1] Transcriptional co-activator involved in regulation of mating-type-specific gene expression; targets the transcription factor Mcm1p to the promoters of alpha-specific genes; one of two genes encoded by the MATalpha mating type cassette involved in the regulation of alpha-specific genes transcription factor                                                                                                                                                                                                                                                                                                                                                                     |
| <b>YML099C</b> | [ARG81] Zinc-finger transcription factor of the Zn(2)-Cys(6) binuclear cluster domain type, involved in the regulation of arginine-responsive genes; acts with Arg80p and Arg82p zinc finger transcription factor of the Zn(2)-Cys(6) binuclear cluster domain type                                                                                                                                                                                                                                                                                                                                                                                                                                 |
| <b>YMR043W</b> | [MCM1] Transcription factor involved in cell-type-specific transcription and pheromone response; plays a central role in the formation of both repressor and activator complexes contains the 56 amino-acid MADS (MCM1, AG, DEFAm SRF)-box motif within its DNA binding domain, plays a central role in the formation of both repressor and activator complexes transcription factor Null mutant is inviable, Pro97Leu mutant is sterile, exhibits defects in minichromosome maintenance                                                                                                                                                                                                            |
| <b>YDR173C</b> | [ARG82] Protein involved in regulation of arginine-responsive and Mcm1p-dependent genes; has a dual-specificity inositol polyphosphate kinase activity required for regulation of phosphate- and nitrogen-responsive genes dual specificity inositol 1,4,5-trisphosphate 6-kinase/inositol 1,4,5,6-tetrakisphosphate 3-kinase (IP3 6-/IP4 3-kinase) Null mutant is viable but requires arginine at 23C; growth defect at 30C; inviable at 37C; null is defective in sporulation, mating, amino acid metabolism (fails to grow on medium in which arginine or ornithine is the sole nitrogen source); null mutants accumulate IP3, I(4,5)P2 and have drastically reduced levels of IP4, IP5 and IP6. |
| <b>YMR042W</b> | [ARG80] Transcription factor involved in regulation of arginine-responsive genes; acts with Arg81p and Arg82p transcription factor Arginine requiring                                                                                                                                                                                                                                                                                                                                                                                                                                                                                                                                               |
| 0213           | GO_TERM:[biological_process] P-Value:2.3e-01                                                                                                                                                                                                                                                                                                                                                                                                                                                                                                                                                                                                                                                        |
| YGL166W        | [CUP2] Copper-binding transcription factor; activates transcription of the metallothionein genes CUP1-1 and CUP1-2 in response to elevated copper concentrations transcriptional activator Null mutant is sensitive to Cu2+                                                                                                                                                                                                                                                                                                                                                                                                                                                                         |
| YAL064W        |                                                                                                                                                                                                                                                                                                                                                                                                                                                                                                                                                                                                                                                                                                     |
| YKR011C        |                                                                                                                                                                                                                                                                                                                                                                                                                                                                                                                                                                                                                                                                                                     |

|         |                                                                                                                                                                                                                                                                                                                                                                                                                                                                                                                                                                                                                                                         |
|---------|---------------------------------------------------------------------------------------------------------------------------------------------------------------------------------------------------------------------------------------------------------------------------------------------------------------------------------------------------------------------------------------------------------------------------------------------------------------------------------------------------------------------------------------------------------------------------------------------------------------------------------------------------------|
| 0214    | GO_TERM:[cellular_component] P-Value:1.5e-01                                                                                                                                                                                                                                                                                                                                                                                                                                                                                                                                                                                                            |
| YLR035C | [MLH2] Protein required for DNA mismatch repair in mitosis and meiosis; involved in the repair of mutational intermediates; forms a complex with Pms1p and Msh1p to repair mismatched DNA Null mutant is viable but non-Mendelian segregation is elevated and parity is altered during meiosis.                                                                                                                                                                                                                                                                                                                                                         |
| YBR213W | [MET8] Bifunctional dehydrogenase and ferredoxin, involved in the biosynthesis of heme; also involved in the expression of PAPS reductase and sulfite reductase Null mutant is viable, and is a methionine auxotroph                                                                                                                                                                                                                                                                                                                                                                                                                                    |
| YMR206W |                                                                                                                                                                                                                                                                                                                                                                                                                                                                                                                                                                                                                                                         |
| 0215    | GO_TERM:[i-AAA complex] P-Value:6.0e-06                                                                                                                                                                                                                                                                                                                                                                                                                                                                                                                                                                                                                 |
| YEL048C |                                                                                                                                                                                                                                                                                                                                                                                                                                                                                                                                                                                                                                                         |
| YIL136W | [OM45] Protein of unknown function, major constituent of the mitochondrial outer membrane; located on the outer (cytosolic) face of the outer membrane 45 kDa mitochondrial outer membrane protein Null mutant is viable and shows normal growth, viability, mitochondrial function and mitochondrial protein import                                                                                                                                                                                                                                                                                                                                    |
| YCL044C | [MGR1] Subunit, with Yme1p, of the mitochondrial inner membrane i-AAA protease complex, which is responsible for degradation of unfolded or misfolded mitochondrial gene products; required for growth of cells lacking the mitochondrial genome                                                                                                                                                                                                                                                                                                                                                                                                        |
| YPR024W | [YME1] Subunit, with Mgr1p, of the mitochondrial inner membrane i-AAA protease complex, which is responsible for degradation of unfolded or misfolded mitochondrial gene products; mutation causes an elevated rate of mitochondrial turnover Null mutant is viable, exhibits an elevation in the rate at which copies of TRP1 and ARS1, integrated into the mitochondrial genome, escape to the nucleus; a heat-sensitive respiratory-growth defect; a cold-sensitive growth defect on rich glucose medium; and synthetic lethality in rho- (cytoplasmic petite) cells; yme1 (osd1) mutants fail to degrade newly synthesized subunits of cytochrome c |
| 0216    |                                                                                                                                                                                                                                                                                                                                                                                                                                                                                                                                                                                                                                                         |
| YMR267W | [PPA2] Mitochondrial inorganic pyrophosphatase, required for mitochondrial function and possibly involved in energy generation from inorganic pyrophosphate inorganic pyrophosphatase Null mutant is viable but is unable to grow on respiratory carbon sources and lacks mitochondrial DNA                                                                                                                                                                                                                                                                                                                                                             |
| YGR239C | [PEX21] Part of a two-member peroxin family (Pex18p and Pex21p) specifically required for peroxisomal targeting of the Pex7p peroxisomal signal recognition factor and PTS2-type peroxisomal matrix proteins peroxin                                                                                                                                                                                                                                                                                                                                                                                                                                    |
| YOR389W |                                                                                                                                                                                                                                                                                                                                                                                                                                                                                                                                                                                                                                                         |
| 0217    | GO_TERM:[dodecenoyl-CoA delta-isomerase activity] P-Value:1.9e-07                                                                                                                                                                                                                                                                                                                                                                                                                                                                                                                                                                                       |
| YLR284C | [ECI1] Peroxisomal delta3,delta2-enoyl-CoA isomerase, hexameric protein that converts 3-hexenoyl-CoA to trans-2-hexenoyl-CoA, essential for the beta-oxidation of unsaturated fatty acids, oleate-induced d3,d2-Enoyl-CoA Isomerase Null mutant is viable but fails to metabolize unsaturated fatty acids                                                                                                                                                                                                                                                                                                                                               |
| YOR180C | [DCI1] Peroxisomal delta(3,5)-delta(2,4)-dienoyl-CoA isomerase, involved in fatty acid metabolism, contains peroxisome targeting signals at amino and carboxy termini delta(3,5)-delta(2,4)-dienoyl-CoA isomerase                                                                                                                                                                                                                                                                                                                                                                                                                                       |
| 0218    | GO_TERM:[protein targeting to peroxisome] P-Value:2.3e-04                                                                                                                                                                                                                                                                                                                                                                                                                                                                                                                                                                                               |
| YMR211W | [DML1] Essential protein involved in mtDNA inheritance, may also function in the partitioning of the mitochondrial organelle or in the segregation of chromosomes, exhibits regions similar to members of a GTPase family Protein required for cell viability Null: inviable. Other phenotypes: Meiotic progeny DML1 cells of the DML1/dml1Delta heterozygote are completely devoid of mtDNA ([rho0]). In addition, meiotic transmission of centromeric plasmids also appears to be impaired.                                                                                                                                                           |
| YAL055W | [PEX22] Putative peroxisomal membrane protein required for import of peroxisomal proteins, functionally complements a Pichia pastoris pex22 mutation Null mutant is viable and oleate minus                                                                                                                                                                                                                                                                                                                                                                                                                                                             |
| YGR133W | [PEX4] Peroxisomal ubiquitin conjugating enzyme required for peroxisomal matrix protein import and peroxisome biogenesis ubiquitin-conjugating protein family                                                                                                                                                                                                                                                                                                                                                                                                                                                                                           |
| 0219    | GO_TERM:[peroxisome organization and biogenesis] P-Value:1.9e-28                                                                                                                                                                                                                                                                                                                                                                                                                                                                                                                                                                                        |
| YHR160C | [PEX18] Part of a two-member peroxin family (Pex18p and Pex21p) specifically required for peroxisomal targeting of the Pex7p peroxisomal signal recognition factor and PTS2 peroxisomal matrix proteins peroxin Null mutant is viable but has reduced growth on oleate, partial impairment of peroxisome biogenesis                                                                                                                                                                                                                                                                                                                                     |
| YIL160C | [POT1] 3-ketoacyl-CoA thiolase with broad chain length specificity, cleaves 3-ketoacyl-CoA into acyl-CoA and acetyl-CoA during beta-oxidation of fatty acids 3-oxoacyl CoA thiolase Null mutant is viable, unable to use oleic acid as a carbon source                                                                                                                                                                                                                                                                                                                                                                                                  |
| YDR142C | [PEX7] Peroxisomal signal receptor for the N-terminal nonapeptide signal (PTS2) of peroxisomal matrix proteins; WD repeat protein; defects in human homolog cause lethal rhizomelic chondrodysplasia punctata (RCDP) beta-transducin-related (WD-40) protein family Mutant is defective in assembling specific proteins into peroxisomes (assembles catalase and acyl-CoA oxidase but not thiolase) and cannot utilize oleic acid                                                                                                                                                                                                                       |
| YDR329C | [PEX3] Peroxisomal membrane protein (PMP) required to recruit Pex19p chaperone to peroxisomes; plays selective, essential, direct role in PMP import as a docking factor for Pex19p 48 kDa peroxisomal integral membrane protein Mutant lacks peroxisomes and shows cytosolic mislocalization of peroxisomal matrix enzymes                                                                                                                                                                                                                                                                                                                             |

|                |                                                                                                                                                                                                                                                                                                                                                                                                                                                                                                                                                                                                |
|----------------|------------------------------------------------------------------------------------------------------------------------------------------------------------------------------------------------------------------------------------------------------------------------------------------------------------------------------------------------------------------------------------------------------------------------------------------------------------------------------------------------------------------------------------------------------------------------------------------------|
| YOL044W        | [PEX15] Phosphorylated tail-anchored type II integral peroxisomal membrane protein required for peroxisome biogenesis, cells lacking Pex15p mislocalize peroxisomal matrix proteins to cytosol, overexpression results in impaired peroxisome assembly 44 kDa phosphorylated integral peroxisomal membrane protein                                                                                                                                                                                                                                                                             |
| YDL065C        | [PEX19] Chaperone and import receptor for newly-synthesized class I peroxisomal membrane proteins (PMPs), binds PMPs in the cytoplasm and delivers them to the peroxisome for subsequent insertion into the peroxisomal membrane 40 kDa farnesylated protein associated with peroxisomes mutant lacks morphologically recognizable peroxisomes and shows mislocalization of peroxisomal matrix proteins                                                                                                                                                                                        |
| YGR077C        | [PEX8] Intraperoxisomal organizer of the peroxisomal import machinery, tightly associated with the luminal face of the peroxisomal membrane, essential for peroxisome biogenesis, binds PTS1-signal receptor Pex5p peroxisome associated protein containing a PTS1 signal                                                                                                                                                                                                                                                                                                                      |
| YGL153W        | [PEX14] Peroxisomal membrane protein that is a central component of the peroxisomal protein import machinery, interacts with PTS1 (Pex5p) and PTS2 (Pex7p) peroxisomal matrix protein signal recognition factors and membrane receptor Pex13p peroxin Null mutant is viable but is unable to grow on oleate and lacks peroxisomes                                                                                                                                                                                                                                                              |
| YLR191W        | [PEX13] Integral peroxisomal membrane receptor for the PTS1 peroxisomal matrix protein signal recognition factor Pex5p, required for the translocation of peroxisomal matrix proteins, also interacts with Pex7p and Pex14p, contains a C-terminal SH3 domain contains Src homology 3 (SH3) domain Defective in peroxisome assembly                                                                                                                                                                                                                                                            |
| YDR265W        | [PEX10] RING finger peroxisomal membrane peroxin required for peroxisomal matrix protein import, interacts with Pex12p, links ubiquitin-conjugating Pex4p to protein import machinery; mutations in human homolog cause a variety of peroxisomal disorders C3HC4 zinc-binding integral peroxisomal membrane protein peroxin mutant lacks morphologically recognizable peroxisomes and shows cytosolic mislocalization of peroxisomal matrix proteins                                                                                                                                           |
| YJL210W        | [PEX2] RING-finger peroxin, peroxisomal membrane protein with a C-terminal zinc-binding RING domain, forms putative translocation subcomplex with Pex10p and Pex12p which functions in peroxisomal matrix protein import CH3HC4 zinc-binding integral peroxisomal membrane protein peroxin Null mutant is viable but lacks morphologically recognizable peroxisomes and shows cytosolic mislocalization of peroxisomal matrix proteins                                                                                                                                                         |
| YDR244W        | [PEX5] Peroxisomal membrane signal receptor for C-terminal tripeptide signal sequence (PTS1) of peroxisomal matrix proteins, required for peroxisomal matrix protein import, tetratricopeptide repeat protein, also involved in PTS1-independent import 69 kDa protein containing tetratricopeptide repeat (TPR) peroxin Null mutant is viable but accumulates peroxisomal, leaflet-like membrane structures and exhibits deficient import of some peroxisomal matrix enzymes, particularly proteins with an SKL-like import signal                                                            |
| YMR026C        | [PEX12] RING-finger peroxisomal membrane peroxin that plays an essential role in peroxisome biogenesis and peroxisomal matrix protein import, forms translocation subcomplex with Pex2p and Pex10p C3HC4 zinc-binding integral peroxisomal membrane protein mutant lacks morphologically recognizable peroxisomes and shows cytosolic mislocalization of peroxisomal matrix proteins                                                                                                                                                                                                           |
| YNL214W        | [PEX17] Peroxisomal membrane protein component of the peroxisomal translocation machinery, required for peroxisome biogenesis, binds Pex14p peroxin mutant lacks morphologically recognizable peroxisomes and shows mislocalization of peroxisomal matrix proteins                                                                                                                                                                                                                                                                                                                             |
| 0220           | GO_TERM:[physiological process] P-Value:4.2e-01 OVERLAP:[Cytochrome c oxidase (complex IV)] <420.40> SIZE:11                                                                                                                                                                                                                                                                                                                                                                                                                                                                                   |
| <b>YLR038C</b> | [COX12] Subunit VIb of cytochrome c oxidase, which is the terminal member of the mitochondrial inner membrane electron transport chain; required for assembly of fully active cytochrome c oxidase but not required for activity after assembly cytochrome c oxidase subunit VIb Null mutant is viable, grows poorly at room temperature, fails to grow on glycerol/ethanol media at 37 degrees                                                                                                                                                                                                |
| YML125C        | [PGA3] Essential protein required for maturation of Gas1p and Pho8p; GFP-fusion protein localizes to the endoplasmic reticulum; null mutants have a cell separation defect                                                                                                                                                                                                                                                                                                                                                                                                                     |
| 0221           | GO_TERM:[response to chemical stimulus] P-Value:1.0e-05                                                                                                                                                                                                                                                                                                                                                                                                                                                                                                                                        |
| YPL156C        | [PRM4] Pheromone-regulated protein, predicted to have 1 transmembrane segment; transcriptionally regulated by Ste12p during mating and by Cat8p during the diauxic shift                                                                                                                                                                                                                                                                                                                                                                                                                       |
| YDR135C        | [YCF1] Vacuolar glutathione S-conjugate transporter of the ATP-binding cassette family, has a role in detoxifying metals such as cadmium, mercury, and arsenite; also transports unconjugated bilirubin; similar to human cystic fibrosis protein CFTR Null mutant is viable, hypersensitive to cadmium                                                                                                                                                                                                                                                                                        |
| YIL010W        | [DOT5] Nuclear thiol peroxidase which functions as an alkyl-hydroperoxide reductase during post-diauxic growth                                                                                                                                                                                                                                                                                                                                                                                                                                                                                 |
| YPL188W        | [POS5] Mitochondrial NADH kinase, phosphorylates NADH; also phosphorylates NAD(+) with lower specificity; required for the response to oxidative stress pos5 mutants are peroxide sensitive                                                                                                                                                                                                                                                                                                                                                                                                    |
| YGL181W        | [GTS1] Protein containing a zinc-finger in the N-terminus and a long Gln-rich region in the C-terminus; regulates ultradian rhythm, cell size, cell cycle, lifespan, sporulation, heat tolerance, and multidrug transport Null mutant is viable; shows reduced lag phase                                                                                                                                                                                                                                                                                                                       |
| YLR188W        | [MDL1] Half-type ATP-binding cassette (ABC) transporter of the inner mitochondrial membrane, mediates export of peptides generated upon proteolysis of mitochondrial proteins, plays a role in the regulation of cellular resistance to oxidative stress                                                                                                                                                                                                                                                                                                                                       |
| 0222           | GO_TERM:[biopolymer modification] P-Value:2.5e-01                                                                                                                                                                                                                                                                                                                                                                                                                                                                                                                                              |
| YIL057C        |                                                                                                                                                                                                                                                                                                                                                                                                                                                                                                                                                                                                |
| YGL236C        | [MTO1] Mitochondrial protein, forms a heterodimer complex with Mss1p that performs the 5-carboxymethylaminomethyl modification of the wobble uridine base in mitochondrial tRNAs; required for respiration in paromomycin-resistant 15S rRNA mutants                                                                                                                                                                                                                                                                                                                                           |
| YPL179W        | [PPQ1] Putative protein serine/threonine phosphatase; null mutation enhances efficiency of translational suppressors protein phosphatase Q Null mutants are viable, show an altered morphology, have a slight growth defect on several carbon sources, have lower cell density in stationary phase in the absence of an essential amino acid, show a reduced rate of protein synthesis in exponential phase, are hypersensitive to protein synthesis inhibitors, and have an allosuppressor phenotype in suppressor strain backgrounds (i.e. enhanced efficiency of translational suppressors) |

|           |                                                                                                                                                                                                                                                                                                                                                                                                                                                                                                                         |
|-----------|-------------------------------------------------------------------------------------------------------------------------------------------------------------------------------------------------------------------------------------------------------------------------------------------------------------------------------------------------------------------------------------------------------------------------------------------------------------------------------------------------------------------------|
| 0223      | GO_TERM:[mating pheromone activity] P-Value:1.4e-05                                                                                                                                                                                                                                                                                                                                                                                                                                                                     |
| YGR141W   | [VPS62] Vacuolar protein sorting (VPS) protein required for cytoplasm to vacuole targeting of proteins                                                                                                                                                                                                                                                                                                                                                                                                                  |
| YMR265C   |                                                                                                                                                                                                                                                                                                                                                                                                                                                                                                                         |
| YPL187W   | [MF(ALPHA)1] Mating pheromone alpha-factor, made by alpha cells; interacts with mating type a cells to induce cell cycle arrest and other responses leading to mating; also encoded by MF(ALPHA)2, although MF(ALPHA)1 produces most alpha-factor mating factor alpha                                                                                                                                                                                                                                                   |
| YFL026W   | [STE2] Receptor for alpha-factor pheromone; seven transmembrane-domain GPCR that interacts with both pheromone and a heterotrimeric G protein to initiate the signaling response that leads to mating between haploid a and alpha cells G protein coupled receptor (GPCR) alpha-factor pheromone receptor seven-transmembrane domain protein                                                                                                                                                                            |
| YGL089C   | [MF(ALPHA)2] Mating pheromone alpha-factor, made by alpha cells; interacts with mating type a cells to induce cell cycle arrest and other responses leading to mating; also encoded by MF(ALPHA)1, which is more highly expressed than MF(ALPHA)2 alpha mating factor                                                                                                                                                                                                                                                   |
| 0224      | GO_TERM:[adaptation to pheromone during conjugation with cellular fusion] P-Value:6.7e-04                                                                                                                                                                                                                                                                                                                                                                                                                               |
| YDR319C   |                                                                                                                                                                                                                                                                                                                                                                                                                                                                                                                         |
| YNL327W   | [EGT2] Glycosylphosphatidylinositol (GPI)-anchored cell wall endoglucanase required for proper cell separation after cytokinesis, expression is activated by Swi5p and tightly regulated in a cell cycle-dependent manner                                                                                                                                                                                                                                                                                               |
| YEL025C   |                                                                                                                                                                                                                                                                                                                                                                                                                                                                                                                         |
| YDL180W   |                                                                                                                                                                                                                                                                                                                                                                                                                                                                                                                         |
| YGL178W   | [MPT5] Protein that specifically binds to mRNAs encoding chromatin modifiers and spindle pole body components; has roles in longevity, in maintenance of cell wall integrity, and in sensitivity to and recovery from pheromone arrest Null mutant is viable, temperature sensitive                                                                                                                                                                                                                                     |
| YLR452C   | [SST2] GTPase-activating protein for Gpa1p, regulates desensitization to alpha factor pheromone; also required to prevent receptor-independent signaling of the mating pathway; member of the RGS (regulator of G-protein signaling) family GTPase activating protein (GAP) RGS (regulator of G-protein signalling) family Null mutants are viable and exhibit increased sensitivity to mating factors                                                                                                                  |
| 0225      | GO_TERM:[catalytic activity] P-Value:4.0e-02                                                                                                                                                                                                                                                                                                                                                                                                                                                                            |
| YMR300C   | [ADE4] Phosphoribosylpyrophosphate amidotransferase (PRPPAT; amidophosphoribosyltransferase), catalyzes first step of the 'de novo' purine nucleotide biosynthetic pathway phosphoribosylpyrophosphate amidotransferase Adenine requiring                                                                                                                                                                                                                                                                               |
| YAL012W   | [CYS3] Cystathionine gamma-lyase, catalyzes one of the two reactions involved in the transsulfuration pathway that yields cysteine from homocysteine with the intermediary formation of cystathionine; cystathionine gamma-lyase Null mutant is viable, cysteine auxotroph                                                                                                                                                                                                                                              |
| YMR101C   | [SRT1] Cis-prenyltransferase involved in synthesis of long-chain dolichols (19-22 isoprene units; as opposed to Rer2p which synthesizes shorter-chain dolichols); localizes to lipid bodies; transcription is induced during stationary phase cis-prenyltransferase Null mutant is viable, grows at all temperatures tested and is not hygromycin B sensitive; srt1 rer2 double disruption mutants are inviable; overexpression of SRT1 suppresses the temperature sensitive and slow growth phenotypes of rer2 mutants |
| 0226      |                                                                                                                                                                                                                                                                                                                                                                                                                                                                                                                         |
| YDL186W   |                                                                                                                                                                                                                                                                                                                                                                                                                                                                                                                         |
| YJL167W   | [ERG20] Farnesyl pyrophosphate synthetase, has both dimethylallyltranstransferase and geranyltranstransferase activities; catalyzes the formation of C15 farnesyl pyrophosphate units for isoprenoid and sterol biosynthesis farnesyl diphosphate synthetase (FPP synthetase)                                                                                                                                                                                                                                           |
| 0227      | GO_TERM:[pre-autophagosomal structure] P-Value:5.3e-05                                                                                                                                                                                                                                                                                                                                                                                                                                                                  |
| YFL068W   |                                                                                                                                                                                                                                                                                                                                                                                                                                                                                                                         |
| YMR159C   | [ATG16] Protein that interacts with the Atg12p-Atg5p conjugate during formation of the pre-autophagosomal structure; essential for autophagy Null mutant is viable, defective in autophagy                                                                                                                                                                                                                                                                                                                              |
| YLR390W-A | [CCW14] Covalently linked cell wall glycoprotein, present in the inner layer of the cell wall cell wall mannoprotein Null mutant is viable but causes increased sensitivities to calcofluor white, Congo red, and zymolyase digestion. Overexpression also causes calcofluor white and Congo red sensitivity. (see Moukadiri et al (1997) J. Bacteriol. 179:2154-62).                                                                                                                                                   |
| YPL149W   | [ATG5] Conserved autophagy-related protein that undergoes conjugation with Atg12p and then associates with Atg16p to form a cytosolic complex essential for autophagosome formation reduced viability upon nutrient starvation; defective in autophagy                                                                                                                                                                                                                                                                  |
| 0228      | GO_TERM:[biological_process] P-Value:2.3e-01                                                                                                                                                                                                                                                                                                                                                                                                                                                                            |
| YJL197W   | [UBP12] Ubiquitin-specific protease present in the nucleus and cytoplasm that cleaves ubiquitin from ubiquitinated proteins ubiquitin carboxyl-terminal hydrolase                                                                                                                                                                                                                                                                                                                                                       |

|                |                                                                                                                                                                                                                                                                                                                                                                                                                                                                             |
|----------------|-----------------------------------------------------------------------------------------------------------------------------------------------------------------------------------------------------------------------------------------------------------------------------------------------------------------------------------------------------------------------------------------------------------------------------------------------------------------------------|
| YGL050W        | [TYW3] Hypothetical protein                                                                                                                                                                                                                                                                                                                                                                                                                                                 |
| YJR031C        | [GEA1] Guanine nucleotide exchange factor for ADP ribosylation factors (ARFs), involved in vesicular transport between the Golgi and ER, Golgi organization, and actin cytoskeleton organization; similar to but not functionally redundant with Gea2p GDP/GTP exchange factor                                                                                                                                                                                              |
| 0229           | GO_TERM:[second-messenger-mediated signaling] P-Value:1.8e-06 OVERLAP:[Pheromone response pathway] <470.30.10> SIZE:3                                                                                                                                                                                                                                                                                                                                                       |
| YML104C        | [MDM1] Intermediate filament protein, required for nuclear and mitochondrial transmission to daughter buds intermediate filament protein Null mutant is inviable; temperature sensitive mutants display defective transfer of nuclei and mitochondria into developing buds at the non-permissive temperature                                                                                                                                                                |
| <b>YHR005C</b> | [GPA1] GTP-binding alpha subunit of the heterotrimeric G protein that couples to pheromone receptors; negatively regulates the mating pathway by sequestering G(beta)gamma and by triggering an adaptive response; activates the pathway via Scp160p G protein alpha subunit coupled to mating factor receptor The null mutation is inviable in haploids but not diploids. Gpa1 mutants exhibit specific defects in the pheromone responsiveness of both a and alpha cells. |
| YOR107W        | [RGS2] Negative regulator of glucose-induced cAMP signaling; directly activates the GTPase activity of the heterotrimeric G protein alpha subunit Gpa2p GTPase activating protein (GAP) Null mutant is viable but exhibits high PKA phenotypes (low trehalose and glycogen levels, heat sensitivity, low expression of HSP12). Overexpression results in low PKA phenotypes and suppresses the glucose induced cAMP signal.                                                 |
| YBL056W        | [PTC3] Type 2C protein phosphatase; dephosphorylates Hog1p (see also Ptc2p) to limit maximal kinase activity induced by osmotic stress; dephosphorylates T169 phosphorylated Cdc28p (see also Ptc2p); role in DNA checkpoint inactivation protein phosphatase type 2C                                                                                                                                                                                                       |
| YBR128C        | [ATG14] Subunit of an autophagy-specific phosphatidylinositol 3-kinase complex (with Vps34p, Vps15p, and Vps30p) required for organization of a pre-autophagosomal structure; ATG14 transcription is activated by Gln3p during nitrogen starvation Null mutant is viable but defective in autophagy.                                                                                                                                                                        |
| YPL120W        | [VPS30] Protein that forms a membrane-associated complex with Apg14p that is essential for autophagy; involved in a retrieval step of the carboxypeptidase Y receptor, Vps10p, to the late Golgi from the endosome; involved in vacuolar protein sorting Vacuolar hydrolases sorting receptor Vps10p is mislocalized in vps30 mutants.                                                                                                                                      |
| YLR360W        | [VPS38] Part of a Vps34p phosphatidylinositol 3-kinase complex that functions in carboxypeptidase Y (CPY) sorting; binds Vps30p and Vps34p to promote production of phosphatidylinositol 3-phosphate (PtdIns3P) which stimulates kinase activity                                                                                                                                                                                                                            |
| YBR097W        | [VPS15] Myristoylated serine/threonine protein kinase involved in vacuolar protein sorting; functions as a membrane-associated complex with Vps34p; active form recruits Vps34p to the Golgi membrane; also detected in mitochondria serine/threonine protein kinase defective vacuolar protein localization                                                                                                                                                                |
| YLR240W        | [VPS34] Phosphatidylinositol 3-kinase responsible for the synthesis of phosphatidylinositol 3-phosphate; forms membrane-associated signal transduction complex with Vps15p to regulate protein sorting; similar to p110 subunit of mammalian PI 3-kinase phosphatidylinositol 3-kinase temperature sensitive, defective vacuolar protein sorting                                                                                                                            |
| 0230           | GO_TERM:[plasma membrane] P-Value:8.4e-07                                                                                                                                                                                                                                                                                                                                                                                                                                   |
| YDR105C        | [TMS1] Vacuolar membrane protein of unknown function that is conserved in mammals; predicted to contain eleven transmembrane helices; interacts with Pdr5p, a protein involved in multidrug resistance                                                                                                                                                                                                                                                                      |
| YNL160W        | [YGP1] Cell wall-related secretory glycoprotein; induced by nutrient deprivation-associated growth arrest and upon entry into stationary phase; may be involved in adaptation prior to stationary phase entry; has similarity to Sps100p gp37, a glycoprotein synthesized in response to nutrient limitation which is homologous to the sporulation-specific SPS100 gene                                                                                                    |
| YDR420W        | [HKR1] Serine/threonine rich cell surface protein that contains an EF hand motif; involved in the regulation of cell wall beta-1,3 glucan synthesis and bud site selection; overexpression confers resistance to Hansenula mrakii killer toxin, HM-1 contains EF hand motif type I transmembrane protein Null mutant is inviable; overexpression confers resistance to Hanenula mrakii killer toxin                                                                         |
| YPR149W        | [NCE102] Protein of unknown function; contains transmembrane domains; involved in secretion of proteins that lack classical secretory signal sequences; component of the detergent-insoluble glycolipid-enriched complexes (DIGs) An uncharacterized allele exhibits defects in the export of the mammalian protein galectin-1.                                                                                                                                             |
| YDR033W        | [MRH1] Protein that localizes primarily to the plasma membrane, also found at the nuclear envelope; has similarity to Hsp30p and Yro2p, which are induced during heat shock                                                                                                                                                                                                                                                                                                 |
| YDR011W        | [SNQ2] ABC transporter protein involved in multidrug resistance and resistance to singlet oxygen species ABC transporter null mutant is viable; overexpression confers multi-drug resistance                                                                                                                                                                                                                                                                                |
| YGR266W        |                                                                                                                                                                                                                                                                                                                                                                                                                                                                             |
| YOR153W        | [PDR5] Short-lived membrane ABC (ATP-binding cassette) transporter, actively exports various drugs, expression regulated by Pdr1p; also involved in steroid transport, cation resistance, and cellular detoxification during exponential growth multidrug resistance transporter pleiotropic drug resistance                                                                                                                                                                |
| 0231           | GO_TERM:[bud site selection] P-Value:3.7e-06                                                                                                                                                                                                                                                                                                                                                                                                                                |
| YPR121W        | [THI22] Protein with similarity to hydroxymethylpyrimidine phosphate kinases; member of a gene family with THI20 and THI21; not required for thiamine biosynthesis                                                                                                                                                                                                                                                                                                          |
| YDR316W        | [OMS1] Protein integral to the mitochondrial membrane; has a conserved methyltransferase motif; multicopy suppressor of respiratory defects caused by OXA1 mutations                                                                                                                                                                                                                                                                                                        |
| YFL053W        | [DAK2] Dihydroxyacetone kinase, required for detoxification of dihydroxyacetone (DHA); involved in stress adaptation dihydroxyacetone kinase Null mutant is viable and show no growth defect in normal medium; mutant lacking both dak1 and dak2 is sensitive to dihydroxyacetone during saline growth                                                                                                                                                                      |
| YLR084C        | [RAX2] N-glycosylated protein involved in the maintenance of bud site selection during bipolar budding; localization requires Rax1p Null mutant is defective in bipolar pattern                                                                                                                                                                                                                                                                                             |

|         |                                                                                                                                                                                                                                                                                                                                                                                                                                                                                                                                    |
|---------|------------------------------------------------------------------------------------------------------------------------------------------------------------------------------------------------------------------------------------------------------------------------------------------------------------------------------------------------------------------------------------------------------------------------------------------------------------------------------------------------------------------------------------|
| YGR041W | [BUD9] Protein involved in bud-site selection; diploid mutants display a unipolar budding pattern instead of the wild-type bipolar pattern, and bud at the distal pole In null mutants bipolar-budding cells bud preferentially at distal pole                                                                                                                                                                                                                                                                                     |
| YLR353W | [BUD8] Protein involved in bud-site selection; diploid mutants display a unipolar budding pattern instead of the wild-type bipolar pattern, and bud at the proximal pole A bud8 bud9 double mutant buds almost exclusively from the proximal pole                                                                                                                                                                                                                                                                                  |
| YOR301W | [RAX1] Protein involved in bud site selection during bipolar budding; localization requires Rax2p; has similarity to members of the insulin-related peptide superfamily                                                                                                                                                                                                                                                                                                                                                            |
| 0232    | GO_TERM:[molecular_function] P-Value:5.5e-01                                                                                                                                                                                                                                                                                                                                                                                                                                                                                       |
| YMR020W | [FMS1] Polyamine oxidase, converts spermine to spermidine, which is required for the essential hypusination modification of translation factor eIF-5A; also involved in pantothenic acid biosynthesis putative amine oxidase                                                                                                                                                                                                                                                                                                       |
| YPL244C | [HUT1] Protein with a role in UDP-galactose transport to the Golgi lumen, has similarity to human UDP-galactose transporter UGTrel1, exhibits a genetic interaction with <i>S. cerevisiae</i> ERO1                                                                                                                                                                                                                                                                                                                                 |
| YLL002W | [RTT109] Protein with a role in regulation of Ty1 transposition Mutant exhibits abnormal mitochondrial morphology and slight growth defect in dextrose; insertion/truncation at amino acid 332 yields sensitivity to diepoxybutane and to mitomycin C; increase in Ty1 transposition                                                                                                                                                                                                                                               |
| YNL246W | [VPS75] Protein of unknown function involved in vacuolar protein sorting; detected in the nucleus Null mutant secretes CPY.                                                                                                                                                                                                                                                                                                                                                                                                        |
| 0233    | GO_TERM:[biological_process] P-Value:9.2e-02                                                                                                                                                                                                                                                                                                                                                                                                                                                                                       |
| YLR001C |                                                                                                                                                                                                                                                                                                                                                                                                                                                                                                                                    |
| YNL019C |                                                                                                                                                                                                                                                                                                                                                                                                                                                                                                                                    |
| YOR168W | [GLN4] Glutamine tRNA synthetase, monomeric class I tRNA synthetase that catalyzes the specific glutaminylation of tRNA(Glu); N-terminal domain proposed to be involved in enzyme-tRNA interactions glutamine-tRNA ligase                                                                                                                                                                                                                                                                                                          |
| YOR352W |                                                                                                                                                                                                                                                                                                                                                                                                                                                                                                                                    |
| 0234    | GO_TERM:[Smc5-Smc6 complex] P-Value:7.7e-22                                                                                                                                                                                                                                                                                                                                                                                                                                                                                        |
| YLR007W | [NSE1] Essential subunit of the Mms21-Smc5-Smc6 complex; nuclear protein required for DNA repair and growth nse1 mutants are highly sensitive to DNA-damaging treatments and exhibit abnormal cellular morphologies.                                                                                                                                                                                                                                                                                                               |
| YLR383W | [SMC6] Protein involved in structural maintenance of chromosomes; essential subunit of Mms21-Smc5-Smc6 complex; required for growth, DNA repair, interchromosomal and sister chromatid recombination; homologous to <i>S. pombe</i> rad18                                                                                                                                                                                                                                                                                          |
| YML023C | [NSE5] Essential subunit of the Mms21-Smc5-Smc6 complex; required for cell viability and DNA repair non-SMC element of the Smc5-Smc6 complex                                                                                                                                                                                                                                                                                                                                                                                       |
| YDR288W | [NSE3] Essential subunit of the Mms21-Smc5-Smc6 complex; protein of unknown function; required for DNA repair and growth                                                                                                                                                                                                                                                                                                                                                                                                           |
| YOL034W | [SMC5] Structural maintenance of chromosomes (SMC) protein; essential subunit of the Mms21-Smc5-Smc6 complex; required for growth and DNA repair; <i>S. pombe</i> homolog forms a heterodimer with <i>S. pombe</i> Rad18p that is involved in DNA repair                                                                                                                                                                                                                                                                           |
| YDL105W | [NSE4] Nuclear protein that plays a role in the function of the Smc5p-Rhc18p complex                                                                                                                                                                                                                                                                                                                                                                                                                                               |
| YEL019C | [MMS21] SUMO ligase involved in chromosomal organization and DNA repair; essential subunit of the Mms21-Smc5-Smc6 complex; mutants are sensitive to methyl methanesulfonate and show increased spontaneous mutation and mitotic recombination mms21-1 mutant is sensitive to MMS, X rays and UV and increases the rate of mitotic segregation 23-fold                                                                                                                                                                              |
| 0235    | GO_TERM:[cellular_component] P-Value:1.5e-01                                                                                                                                                                                                                                                                                                                                                                                                                                                                                       |
| YLR138W | [NHA1] Na <sup>+</sup> /H <sup>+</sup> antiporter involved in sodium and potassium efflux through the plasma membrane; required for alkali cation tolerance at acidic pH Null mutant is viable but shows increased sensitivity to sodium and lithium; overexpression of NHA1 confers higher and partially Phenotype-dependent tolerance to those ions                                                                                                                                                                              |
| YHL010C |                                                                                                                                                                                                                                                                                                                                                                                                                                                                                                                                    |
| YKR017C |                                                                                                                                                                                                                                                                                                                                                                                                                                                                                                                                    |
| 0236    | GO_TERM:[organelle part] P-Value:9.8e-01                                                                                                                                                                                                                                                                                                                                                                                                                                                                                           |
| YMR002W |                                                                                                                                                                                                                                                                                                                                                                                                                                                                                                                                    |
| YOR008C | [SLG1] Sensor-transducer of the stress-activated PKC1-MPK1 kinase pathway involved in maintenance of cell wall integrity; involved in organization of the actin cytoskeleton; secretory pathway Wsc1p is required for the arrest of secretion response Null mutant is viable but exhibits caffeine sensitivity, a lysis defect at 37C on YPD that is suppressed by sorbitol, and mating pheromone-induced death; in combination with deletion of wsc2 and/or wsc3, the slg1 mutant shows a lysis defect on YPD at room temperature |
| 0237    | GO_TERM:[hexose metabolism] P-Value:1.0e-02                                                                                                                                                                                                                                                                                                                                                                                                                                                                                        |
| YDR122W | [KIN1] Serine/threonine protein kinase involved in regulation of exocytosis; localizes to the cytoplasmic face of the plasma membrane; closely related to Kin2p Null mutant is viable and shows no obvious phenotypes                                                                                                                                                                                                                                                                                                              |
| YNL035C |                                                                                                                                                                                                                                                                                                                                                                                                                                                                                                                                    |

|         |                                                                                                                                                                                                                                                                                                                                                                                                                                                                                                                                                                                                        |
|---------|--------------------------------------------------------------------------------------------------------------------------------------------------------------------------------------------------------------------------------------------------------------------------------------------------------------------------------------------------------------------------------------------------------------------------------------------------------------------------------------------------------------------------------------------------------------------------------------------------------|
| YDR287W |                                                                                                                                                                                                                                                                                                                                                                                                                                                                                                                                                                                                        |
| YHR163W | [SOL3] 6-phosphogluconolactonase, catalyzes the second step of the pentose phosphate pathway; weak multicopy suppressor of los1-1 mutation; homologous to Sol2p and Sol1p 6-phosphogluconolactonase                                                                                                                                                                                                                                                                                                                                                                                                    |
| 0238    | GO_TERM:[biological_process] P-Value:2.3e-01                                                                                                                                                                                                                                                                                                                                                                                                                                                                                                                                                           |
| YER150W | [SPI1] GPI-anchored, serine/threonine rich cell wall protein of unknown function; basal expression requires Msn2p/Msn4p; expression is induced under conditions of stress and during the diauxic shift; similar to Sed1p                                                                                                                                                                                                                                                                                                                                                                               |
| YCL063W | [VAC17] Protein involved in vacuole inheritance; acts as a vacuole-specific receptor for myosin Myo2p the vacuole-specific receptor of Myo2p, a class V myosin Null: defective in vacuole inheritance                                                                                                                                                                                                                                                                                                                                                                                                  |
| YJL043W |                                                                                                                                                                                                                                                                                                                                                                                                                                                                                                                                                                                                        |
| 0239    | GO_TERM:[peroxisomal membrane] P-Value:5.7e-06                                                                                                                                                                                                                                                                                                                                                                                                                                                                                                                                                         |
| YJL185C |                                                                                                                                                                                                                                                                                                                                                                                                                                                                                                                                                                                                        |
| YMR204C | [INP1] Peripheral membrane protein of peroxisomes involved in peroxisomal inheritance                                                                                                                                                                                                                                                                                                                                                                                                                                                                                                                  |
| YEL066W | [HPA3] D-Amino acid N-acetyltransferase, catalyzes N-acetylation of D-amino acids through ordered bi-bi mechanism in which acetyl-CoA is first substrate bound and CoA is last product liberated; similar to Hpa2p, acetylates histones weakly in vitro D-Amino acid N-acetyltransferase Null mutant is viable and does not show any detectable phenotype                                                                                                                                                                                                                                              |
| YOR193W | [PEX27] Peripheral peroxisomal membrane protein involved in controlling peroxisome size and number, interacts with homologous protein Pex25p                                                                                                                                                                                                                                                                                                                                                                                                                                                           |
| YPL112C | [PEX25] Peripheral peroxisomal membrane peroxin required for the regulation of peroxisome size and maintenance, recruits GTPase Rho1p to peroxisomes, induced by oleate, interacts with homologous protein Pex27p peroxin                                                                                                                                                                                                                                                                                                                                                                              |
| 0240    | GO_TERM:[thiol-disulfide exchange intermediate activity] P-Value:1.3e-05                                                                                                                                                                                                                                                                                                                                                                                                                                                                                                                               |
| YER174C | [GRX4] Hydroperoxide and superoxide-radical responsive glutathione-dependent oxidoreductase; monothiol glutaredoxin subfamily member along with Grx3p and Grx5p; protects cells from oxidative damage glutaredoxin Null mutant is viable and shows moderate sensitivity to oxidative stress and increased oxidation levels of cell proteins                                                                                                                                                                                                                                                            |
| YDR098C | [GRX3] Hydroperoxide and superoxide-radical responsive glutathione-dependent oxidoreductase; monothiol glutaredoxin subfamily member along with Grx4p and Grx5p; protects cells from oxidative damage glutaredoxin Null mutant is viable and shows moderate sensitivity to oxidative stress and increased oxidation levels of cell proteins                                                                                                                                                                                                                                                            |
| YGL220W |                                                                                                                                                                                                                                                                                                                                                                                                                                                                                                                                                                                                        |
| 0241    | GO_TERM:[ergosterol biosynthesis] P-Value:6.9e-12                                                                                                                                                                                                                                                                                                                                                                                                                                                                                                                                                      |
| YMR202W | [ERG2] C-8 sterol isomerase, catalyzes the isomerization of the delta-8 double bond to the delta-7 position at an intermediate step in ergosterol biosynthesis C-8 sterol isomerase synthetic lethal with vma2.                                                                                                                                                                                                                                                                                                                                                                                        |
| YGL001C | [ERG26] C-3 sterol dehydrogenase, catalyzes the second of three steps required to remove two C-4 methyl groups from an intermediate in ergosterol biosynthesis C-3 sterol dehydrogenase                                                                                                                                                                                                                                                                                                                                                                                                                |
| YER044C | [ERG28] Endoplasmic reticulum membrane protein, may facilitate protein-protein interactions between the Erg26p dehydrogenase and the Erg27p 3-ketoreductase and/or tether these enzymes to the ER, also interacts with Erg6p Null mutant is viable; random budding in diploid null mutants; null cells have an unusual sterol content.                                                                                                                                                                                                                                                                 |
| YHR072W | [ERG7] Lanosterol synthase, an essential enzyme that catalyzes the cyclization of squalene 2,3-epoxide, a step in ergosterol biosynthesis 2,3-oxidosqualene-lanosterol cyclase                                                                                                                                                                                                                                                                                                                                                                                                                         |
| YLR100W | [ERG27] 3-keto sterol reductase, catalyzes the last of three steps required to remove two C-4 methyl groups from an intermediate in ergosterol biosynthesis; mutants are sterol auxotrophs 3-keto sterol reductase                                                                                                                                                                                                                                                                                                                                                                                     |
| 0242    | GO_TERM:[lipid biosynthesis] P-Value:1.8e-04                                                                                                                                                                                                                                                                                                                                                                                                                                                                                                                                                           |
| YOR097C |                                                                                                                                                                                                                                                                                                                                                                                                                                                                                                                                                                                                        |
| YOR245C | [DGA1] Diacylglycerol acyltransferase, catalyzes the terminal step of triacylglycerol (TAG) formation, acylates diacylglycerol using acyl-CoA as an acyl donor, localized to lipid particles Acyl-CoA : diacylglycerol acyltransferase                                                                                                                                                                                                                                                                                                                                                                 |
| YML008C | [ERG6] Delta(24)-sterol C-methyltransferase, converts zymosterol to fecosterol in the ergosterol biosynthetic pathway by methylating position C-24; localized to both lipid particles and mitochondrial outer membrane The null mutant is viable, cannot methylate ergosterol precursors at C-24, and lacks ergosterol. The null mutant shows defective conjugation, diminished capacity for transformation, and defective tryptophan uptake. The null mutant is hypersensitive to cycloheximide, Li+, and Na+, sensitive to anthracyclines, dactinomycin, and brefeldin A, and resistant to nystatin. |
| YPR113W | [PIS1] Phosphatidylinositol synthase, required for biosynthesis of phosphatidylinositol, which is a precursor for polyphosphoinositides, sphingolipids, and glycolipid anchors for some of the plasma membrane proteins phosphatidylinositol synthase                                                                                                                                                                                                                                                                                                                                                  |
| 0243    | GO_TERM:[vacuolar membrane] P-Value:3.6e-03                                                                                                                                                                                                                                                                                                                                                                                                                                                                                                                                                            |
| YBR207W | [FTH1] Putative high affinity iron transporter involved in transport of intravacuolar stores of iron; forms complex with Fet5p; expression is regulated by iron; proposed to play indirect role in endocytosis                                                                                                                                                                                                                                                                                                                                                                                         |
| YOR068C | [VAM10] Protein involved in vacuole morphogenesis; acts at an early step of homotypic vacuole fusion that is required for vacuole tethering Required for normal tethering of vacuoles prior to fusion. Null: Fragmented vacuoles.                                                                                                                                                                                                                                                                                                                                                                      |

|                |                                                                                                                                                                                                                                                                                                                                                                                                                                                                                                                                                                               |
|----------------|-------------------------------------------------------------------------------------------------------------------------------------------------------------------------------------------------------------------------------------------------------------------------------------------------------------------------------------------------------------------------------------------------------------------------------------------------------------------------------------------------------------------------------------------------------------------------------|
| 0244           | GO_TERM:[biological_process] P-Value:9.6e-02                                                                                                                                                                                                                                                                                                                                                                                                                                                                                                                                  |
| YCL045C        |                                                                                                                                                                                                                                                                                                                                                                                                                                                                                                                                                                               |
| YLR312C        |                                                                                                                                                                                                                                                                                                                                                                                                                                                                                                                                                                               |
| 0245           | GO_TERM:[isomerase activity] P-Value:1.0e-03                                                                                                                                                                                                                                                                                                                                                                                                                                                                                                                                  |
| YHR124W        | [NDT80] Meiosis-specific transcription factor required for exit from pachytene and for full meiotic recombination; activates middle sporulation genes; competes with Sum1p for binding to promoters containing middle sporulation elements (MSE) DNA binding transcription factor that activates middle sporulation genes Null mutant is viable, arrests in pachytene stage of meiosis at the mononucleate stage with duplicated spindle pole bodies and no spindles, is not rescued by spo11 or rad50; no mitotic phenotype detected, dispensable for double-stranded breaks |
| YPR117W        |                                                                                                                                                                                                                                                                                                                                                                                                                                                                                                                                                                               |
| YDR519W        | [FPR2] Membrane-bound peptidyl-prolyl cis-trans isomerase (PPIase), binds to the drugs FK506 and rapamycin; expression pattern suggests possible involvement in ER protein trafficking peptidyl-prolyl cis-trans isomerase (PPIase)                                                                                                                                                                                                                                                                                                                                           |
| YHR091C        | [MSR1] Mitochondrial arginyl-tRNA synthetase arginyl-tRNA synthetase mutants are deficient in mitochondrial protein synthesis because they cannot acylate the mitochondrial arginyl-tRNA                                                                                                                                                                                                                                                                                                                                                                                      |
| YOL088C        | [MPD2] Member of the protein disulfide isomerase (PDI) family, exhibits chaperone activity; overexpression suppresses the lethality of a pdi1 deletion but does not complement all Pdi1p functions; undergoes oxidation by Ero1p protein disulfide isomerase related protein Null mutant is viable; overproduction of Mpd2p suppresses lethality and carboxypeptidase Y maturation defect caused by pdi1 deletion -- this suppression depends on the CXXC sequence of Mpd2p                                                                                                   |
| 0246           | GO_TERM:[m-AAA complex] P-Value:1.0e-06 OVERLAP:[m-AAA protease complex] <350.10.10> SIZE:2                                                                                                                                                                                                                                                                                                                                                                                                                                                                                   |
| <b>YER017C</b> | [AFG3] Component, with Yta12p, of the mitochondrial inner membrane m-AAA protease that mediates degradation of misfolded or unassembled proteins and is also required for correct assembly of mitochondrial enzyme complexes ATP dependent metalloprotease nuclear petite phenotype; loss of respiratory competence                                                                                                                                                                                                                                                           |
| <b>YMR089C</b> | [YTA12] Component, with Afg3p, of the mitochondrial inner membrane m-AAA protease that mediates degradation of misfolded or unassembled proteins and is also required for correct assembly of mitochondrial enzyme complexes ATPase[CDC48/PAS1/SEC18 (AAA) family Null mutant is viable, petite grossly deficient in mitochondrial respiratory and ATPase complexes, yet synthesizes all proteins encoded by mitochondrial DNA                                                                                                                                                |
| 0247           | GO_TERM:[alpha-1,6-mannosyltransferase complex] P-Value:2.4e-14                                                                                                                                                                                                                                                                                                                                                                                                                                                                                                               |
| YGR132C        | [PHB1] Subunit of the prohibitin complex (Phb1p-Phb2p), a 1.2 MDa ring-shaped inner mitochondrial membrane chaperone that stabilizes newly synthesized proteins; determinant of replicative life span; involved in mitochondrial segregation Phb2p homolog mitochondrial protein                                                                                                                                                                                                                                                                                              |
| YGR231C        | [PHB2] Subunit of the prohibitin complex (Phb1p-Phb2p), a 1.2 MDa ring-shaped inner mitochondrial membrane chaperone that stabilizes newly synthesized proteins; determinant of replicative life span; involved in mitochondrial segregation mammalian BAP37 and S. cerevisiae Phb1p homolog prohibitin homolog                                                                                                                                                                                                                                                               |
| YEL036C        | [ANP1] Subunit of the alpha-1,6 mannosyltransferase complex; type II membrane protein; has a role in retention of glycosyltransferases in the Golgi; involved in osmotic sensitivity and resistance to aminonitrophenyl propanediol Null mutant has altered mannoprotein glycosylation and a defect in N-linked outerchain glycan mannosylation; other mutant phenotypes include aminonitrophenyl propanediol resistance, vanadate resistance, hygromycin B sensitive and a clumpy growth morphology.                                                                         |
| YPL050C        | [MNN9] Subunit of Golgi mannosyltransferase complex also containing Anp1p, Mnn10p, Mnn11p, and Hoc1p that mediates elongation of the polysaccharide mannan backbone; forms a separate complex with Van1p that is also involved in backbone elongation required for complex glycosylation mnn9 is lethal in combination with chs3.                                                                                                                                                                                                                                             |
| YJR075W        | [HOC1] Alpha-1,6-mannosyltransferase involved in cell wall mannan biosynthesis; subunit of a Golgi-localized complex that also contains Anp1p, Mnn9p, Mnn11p, and Mnn10p; identified as a suppressor of a cell lysis sensitive pkc1-371 allele mannosyltransferase (putative) Null mutant is viable but is hypersensitive to calcofluor white and hygromycin B and has lowered restrictive temperature in a pkc1-371 background; high copy suppressor of pkc1-371                                                                                                             |
| YDR245W        | [MNN10] Subunit of a Golgi mannosyltransferase complex also containing Anp1p, Mnn9p, Mnn11p, and Hoc1p that mediates elongation of the polysaccharide mannan backbone; membrane protein of the mannosyltransferase family galactosyltransferase Null mutant is viable, is larger than wild-type cells, is deficient in bud emergence, and depends upon an intact morphogenesis checkpoint control to survive                                                                                                                                                                  |
| YJL183W        | [MNN11] Subunit of a Golgi mannosyltransferase complex that also contains Anp1p, Mnn9p, Mnn10p, and Hoc1p, and mediates elongation of the polysaccharide mannan backbone; has homology to Mnn10p mannosyltransferase complex component Null mutant is viable, exhibits defects in mannan synthesis                                                                                                                                                                                                                                                                            |
| 0248           | GO_TERM:[protein prenyltransferase activity] P-Value:5.1e-09 OVERLAP:[Geranylgeranyltransferase I (GGTase I)] <180.20> SIZE:2                                                                                                                                                                                                                                                                                                                                                                                                                                                 |
| YML097C        | [VPS9] A guanine nucleotide exchange factor involved in vesicle-mediated vacuolar protein transport; specifically stimulates the intrinsic guanine nucleotide exchange activity of Vps21p/Rab5: similar to mammalian ras inhibitors; binds ubiquitin Null mutant is viable, exhibits severe vacuolar protein sorting defects and is temperature sensitive                                                                                                                                                                                                                     |
| YDL090C        | [RAM1] Beta subunit of the CAAX farnesyltransferase (FTase) that prenylates the a-factor mating pheromone and Ras proteins; required for the membrane localization of Ras proteins and a-factor; homolog of the mammalian FTase beta subunit farnesyltransferase beta subunit Null mutant is viable, temperature-sensitive, a-specific sterile, exhibits defect in prenylation of ras proteins and other substrates                                                                                                                                                           |
| <b>YGL155W</b> | [CDC43] Beta subunit of geranylgeranyltransferase type I, catalyzes geranylgeranylation to the cysteine residue in proteins containing a C-terminal CaaX sequence ending in Leu or Phe; has substrates important for morphogenesis protein geranylgeranyltransferase type I polypeptide subunit temperature sensitive mutants unable to form buds and display delocalized cell-surface deposition                                                                                                                                                                             |

|                |                                                                                                                                                                                                                                                                                                                                                                                                                                   |
|----------------|-----------------------------------------------------------------------------------------------------------------------------------------------------------------------------------------------------------------------------------------------------------------------------------------------------------------------------------------------------------------------------------------------------------------------------------|
| <b>YKL019W</b> | [RAM2] Alpha subunit of both the farnesyltransferase and type I geranylgeranyltransferase that catalyze prenylation of proteins containing a CAAX consensus motif; essential protein required for membrane localization of Ras proteins and a-factor CAAX farnesyltransferase alpha subunit lethal                                                                                                                                |
| 0249           | GO_TERM:[molecular_function] P-Value:2.3e-02                                                                                                                                                                                                                                                                                                                                                                                      |
| YLR094C        | [GIS3] Protein of unknown function                                                                                                                                                                                                                                                                                                                                                                                                |
| YLR251W        | [SYM1] Protein required for ethanol metabolism; induced by heat shock and localized to the inner mitochondrial membrane; homologous to mammalian peroxisomal membrane protein Mpv17 Null: fails to grow on ethanol or acetaldehyde at 37 degrees. Other phenotypes: partiallly respiration-defective at 37 degrees                                                                                                                |
| YIL174W        |                                                                                                                                                                                                                                                                                                                                                                                                                                   |
| YNR071C        |                                                                                                                                                                                                                                                                                                                                                                                                                                   |
| YLR110C        | [CCW12] Cell wall protein, mutants are defective in mating and agglutination, expression is downregulated by alpha-factor cell wall mannoprotein Null mutant is viable and shows decrease in mating efficiency and defect in agglutination                                                                                                                                                                                        |
| YLR453C        | [RIF2] Protein that binds to the Rap1p C-terminus and acts synergistically with Rif1p to help control telomere length and establish telomeric silencing; deletion results in telomere elongation nuclear protein                                                                                                                                                                                                                  |
| YPL098C        | [MGR2] Protein required for growth of cells lacking the mitochondrial genome                                                                                                                                                                                                                                                                                                                                                      |
| 0250           | OVERLAP:[cytoplasmic ribosomal small subunit] <500.40.20> SIZE:57                                                                                                                                                                                                                                                                                                                                                                 |
| <b>YHL015W</b> | [RPS20] Protein component of the small (40S) ribosomal subunit; overproduction suppresses mutations affecting RNA polymerase III-dependent transcription; has similarity to E. coli S10 and rat S20 ribosomal proteins ribosomal protein S20                                                                                                                                                                                      |
| YLL031C        | [GPI13] ER membrane localized phosphoryltransferase that adds phosphoethanolamine onto the third mannose residue of the glycosylphosphatidylinositol (GPI) anchor precursor; similar to human PIG-O protein Null mutant is inviable; Gpi13p-depleted strains accumulate a GPI precursor whose glycan headgroup contains 4 mannoses and a phosphoethanolamine side-branch on the first mannose                                     |
| 0251           | GO_TERM:[orotate phosphoribosyltransferase activity] P-Value:1.2e-06                                                                                                                                                                                                                                                                                                                                                              |
| YMR271C        | [URA10] One of two orotate phosphoribosyltransferase isozymes (see also URA5) that catalyze the fifth enzymatic step in the de novo biosynthesis of pyrimidines, converting orotate into orotidine-5'-phosphate orotate phosphoribosyltransferase 2                                                                                                                                                                               |
| YOR350C        | [MNE1] Mitochondrial protein similar to Lucilia illustris mitochondrial cytochrome oxidase                                                                                                                                                                                                                                                                                                                                        |
| YDR058C        | [TGL2] Protein with lipolytic activity towards triacylglycerols and diacylglycerols when expressed in E. coli; role in yeast lipid degradation is unclear triglyceride lipase Null mutant is viable, exhibits no apparent phenotype                                                                                                                                                                                               |
| YML106W        | [URA5] One of two orotate phosphoribosyltransferase isozymes (see also URA10) that catalyze the fifth enzymatic step in de novo biosynthesis of pyrimidines, converting orotate into orotidine-5'-phosphate orotate phosphoribosyltransferase 1                                                                                                                                                                                   |
| 0252           | GO_TERM:[endoplasmic reticulum] P-Value:1.0e-01                                                                                                                                                                                                                                                                                                                                                                                   |
| YNL280C        | [ERG24] C-14 sterol reductase, acts in ergosterol biosynthesis; mutants accumulate the abnormal sterol ighosterol (ergosta-8,14 dienol), and are viable under anaerobic growth conditions but inviable on rich medium under aerobic conditions sterol C-14 reductase Null mutant appears to be inviable in some genetic backgrounds and conditionally lethal in others; erg24 mutations are suppressed by fen1 and fen2 mutations |
| YDR056C        |                                                                                                                                                                                                                                                                                                                                                                                                                                   |
| YDL037C        | [BSC1] Protein of unconfirmed function, similar to cell surface flocculin Muc1p; ORF exhibits genomic organization compatible with a translational readthrough-dependent mode of expression                                                                                                                                                                                                                                       |
| YOR175C        |                                                                                                                                                                                                                                                                                                                                                                                                                                   |
| YOL002C        | [IZH2] Membrane protein involved in zinc metabolism, member of the four-protein IZH family, direct target of the Zap1p transcription factor, expression induced by zinc deficiency and fatty acids, deletion increases sensitivity to elevated zinc                                                                                                                                                                               |
| YIL080W        |                                                                                                                                                                                                                                                                                                                                                                                                                                   |
| YLR461W        | [PAU4] Part of 23-member seripauperin multigene family encoded mainly in subtelomeric regions, active during alcoholic fermentation, regulated by anaerobiosis, negatively regulated by oxygen, repressed by heme                                                                                                                                                                                                                 |
| YGR110W        |                                                                                                                                                                                                                                                                                                                                                                                                                                   |
| YHR114W        | [BZZ1] SH3 domain protein implicated in the regulation of actin polymerization, able to recruit actin polymerization machinery through its SH3 domains, colocalizes with cortical actin patches and Las17p, interacts with type I myosins                                                                                                                                                                                         |
| 0253           | GO_TERM:[tRNA-intron endonuclease activity] P-Value:7.1e-10 OVERLAP:[tRNA splicing] <440.30.30> SIZE:11                                                                                                                                                                                                                                                                                                                           |
| <b>YPL083C</b> | [SEN54] Subunit of the tRNA splicing endonuclease, which is composed of Sen2p, Sen15p, Sen34p, and Sen54p tetrameric tRNA splicing endonuclease 54 kDa subunit                                                                                                                                                                                                                                                                    |
| <b>YAR008W</b> | [SEN34] Subunit of the tRNA splicing endonuclease, which is composed of Sen2p, Sen15p, Sen34p, and Sen54p; Sen34p contains the active site for tRNA 3' splice site cleavage and has similarity to Sen2p and to Archaeal tRNA splicing endonuclease tetrameric tRNA splicing endonuclease 34 kDa subunit Null mutant is inviable and shows H242A impaired 3'splice site cleavage                                                   |
| <b>YLR105C</b> | [SEN2] Subunit of the tRNA splicing endonuclease, which is composed of Sen2p, Sen15p, Sen34p, and Sen54p; Sen2p contains the active site for tRNA 5' splice site cleavage and has similarity to Sen34p and to Archaeal tRNA splicing endonuclease tRNA splicing endonuclease subunit                                                                                                                                              |

|                |                                                                                                                                                                                                                                                                                                                                                                                                                                                                                                                                                                                                                                                                                                            |
|----------------|------------------------------------------------------------------------------------------------------------------------------------------------------------------------------------------------------------------------------------------------------------------------------------------------------------------------------------------------------------------------------------------------------------------------------------------------------------------------------------------------------------------------------------------------------------------------------------------------------------------------------------------------------------------------------------------------------------|
| 0254           | GO_TERM:[catalytic activity] P-Value:4.1e-01                                                                                                                                                                                                                                                                                                                                                                                                                                                                                                                                                                                                                                                               |
| YER051W        | [YER051W] JmjC domain family histone demethylase specific for H3-K36, similar to proteins found in human, mouse, drosophila, X. laevis, C. elegans, and S. pombe histone H3-K36 demethylase                                                                                                                                                                                                                                                                                                                                                                                                                                                                                                                |
| YLR121C        | [YPS3] Aspartic protease, attached to the plasma membrane via a glycosylphosphatidylinositol (GPI) anchor GPI-anchored aspartic protease                                                                                                                                                                                                                                                                                                                                                                                                                                                                                                                                                                   |
| YKR096W        |                                                                                                                                                                                                                                                                                                                                                                                                                                                                                                                                                                                                                                                                                                            |
| YDR140W        | [MTQ2] S-adenosylmethionine-dependent methyltransferase of the seven beta-strand family; methylates release factor eRF1 (Sup45p) in vitro; is not an essential gene; similar to E.coli PmC                                                                                                                                                                                                                                                                                                                                                                                                                                                                                                                 |
| YBL051C        | [PIN4] Protein involved in G2/M phase progression and response to DNA damage, interacts with Rad53p; contains an RNA recognition motif, a nuclear localization signal, and several SQ/TQ cluster domains; hyperphosphorylated in response to DNA damage Other phenotypes: overexpression of PIN4 allows for the induction of the [PSI+] prion by Sup35p overproduction in the strains cured of [PIN+].                                                                                                                                                                                                                                                                                                     |
| YIL151C        |                                                                                                                                                                                                                                                                                                                                                                                                                                                                                                                                                                                                                                                                                                            |
| 0255           | GO_TERM:[biological_process] P-Value:3.0e-02                                                                                                                                                                                                                                                                                                                                                                                                                                                                                                                                                                                                                                                               |
| YGR203W        |                                                                                                                                                                                                                                                                                                                                                                                                                                                                                                                                                                                                                                                                                                            |
| YBL059W        |                                                                                                                                                                                                                                                                                                                                                                                                                                                                                                                                                                                                                                                                                                            |
| YCR099C        |                                                                                                                                                                                                                                                                                                                                                                                                                                                                                                                                                                                                                                                                                                            |
| 0256           | GO_TERM:[late endosome membrane] P-Value:1.6e-10 OVERLAP:[TOM - transport across the outer membrane] <290.10> SIZE:9                                                                                                                                                                                                                                                                                                                                                                                                                                                                                                                                                                                       |
| YFL030W        | [AGX1] Alanine : glyoxylate aminotransferase, catalyzes the synthesis of glycine from glyoxylate, which is one of three pathways for glycine biosynthesis in yeast; has similarity to mammalian and plant alanine : glyoxylate aminotransferases                                                                                                                                                                                                                                                                                                                                                                                                                                                           |
| YIL077C        |                                                                                                                                                                                                                                                                                                                                                                                                                                                                                                                                                                                                                                                                                                            |
| <b>YOR045W</b> | [TOM6] Component of the TOM (translocase of outer membrane) complex responsible for recognition and initial import steps for all mitochondrially directed proteins; promotes assembly and stability of the TOM complex associates with TOM40 protein translocation complex component Null mutant is viable, associated with a delay of import of preproteins, stabilization of preprotein binding to receptors and the general insertion pore, and destabilization of the interaction between receptors and the general insertion pore; tom6 tom40 double mutants are inviable.                                                                                                                            |
| YGR201C        |                                                                                                                                                                                                                                                                                                                                                                                                                                                                                                                                                                                                                                                                                                            |
| YCR015C        |                                                                                                                                                                                                                                                                                                                                                                                                                                                                                                                                                                                                                                                                                                            |
| YML121W        | [GTR1] Cytoplasmic GTP binding protein and negative regulator of the Ran/Tc4 GTPase cycle, through its homolog and binding partner, Gtr2p; involved in phosphate transport and invasive growth; human RagA and RagB proteins are functional homologs small GTPase (putative) Null mutant is viable but grows slowly, is cold-sensitive, and has defects in phosphate uptake                                                                                                                                                                                                                                                                                                                                |
| YGR163W        | [GTR2] Cytoplasmic GTP binding protein, negative regulator of the Ran/Tc4 GTPase cycle downstream of Gtr1p; homolog of human RagC and RagD proteins; component of the EGO complex, which is involved in the regulation of microautophagy similar to Gtr1 small GTPase (putative)                                                                                                                                                                                                                                                                                                                                                                                                                           |
| YBR077C        | [SLM4] Component of the EGO complex, which is involved in the regulation of microautophagy; gene exhibits synthetic genetic interaction with MSS4 encoding phosphatidylinositol 4-phosphate kinase                                                                                                                                                                                                                                                                                                                                                                                                                                                                                                         |
| YKR007W        | [MEH1] Component of the EGO complex, which is involved in the regulation of microautophagy; localizes to the vacuolar membrane, loss results in a defect in vacuolar acidification                                                                                                                                                                                                                                                                                                                                                                                                                                                                                                                         |
| 0257           | GO_TERM:[lipid metabolism] P-Value:6.0e-03                                                                                                                                                                                                                                                                                                                                                                                                                                                                                                                                                                                                                                                                 |
| YNL123W        | [NMA111] Protein of unknown function which may contribute to lipid homeostasis and/or apoptosis; sequence similarity to the mammalian Omi/HtrA2 family of serine proteases                                                                                                                                                                                                                                                                                                                                                                                                                                                                                                                                 |
| YOR317W        | [FAA1] Long chain fatty acyl-CoA synthetase with a preference for C12:0-C16:0 fatty acids; involved in the activation of imported fatty acids; localized to both lipid particles and mitochondrial outer membrane; essential for stationary phase long chain fatty acyl:CoA synthetase Null mutant is viable as long as fatty acid synthase (fas) complex is active                                                                                                                                                                                                                                                                                                                                        |
| 0258           |                                                                                                                                                                                                                                                                                                                                                                                                                                                                                                                                                                                                                                                                                                            |
| YDR251W        | [PAM1] Essential protein of unknown function; exhibits variable expression during colony morphogenesis; overexpression permits survival without protein phosphatase 2A, inhibits growth, and induces a filamentous phenotype Multicopy PAM1 suppresses loss of protein phosphatase 2A (PP2A, encoded by PPH21, PPH21, and PPH3); overexpression of PAM1 inhibits growth and causes a filamentous phenotype                                                                                                                                                                                                                                                                                                 |
| YPL057C        | [SUR1] Probable catalytic subunit of a mannosylinositol phosphorylceramide (MIPC) synthase, forms a complex with probable regulatory subunit Csg2p; function in sphingolipid biosynthesis is overlapping with that of Csh1p integral membrane protein Null mutant is viable, calcium sensitive at 37 degrees C on YPD but calcium tolerant at 26 degrees C, accumulates greatly reduced levels of several mannosylated sphingolipids; sur1 mutations have been isolated based on their ability to suppress certain phenotype of rvs161 mutants including reduced viability upon starvation and sensitivities to unrelated drugs; SUR1 is a high copy suppressor of the calcium sensitivity of csg2 mutants |
| 0259           | GO_TERM:[catalytic activity] P-Value:1.8e-01                                                                                                                                                                                                                                                                                                                                                                                                                                                                                                                                                                                                                                                               |

|         |                                                                                                                                                                                                                                                                                                                                                                                 |
|---------|---------------------------------------------------------------------------------------------------------------------------------------------------------------------------------------------------------------------------------------------------------------------------------------------------------------------------------------------------------------------------------|
| YKL086W | [SRX1] Sulfiredoxin, contributes to oxidative stress resistance by reducing cysteine-sulfinic acid groups in the peroxiredoxins Tsa1p and Ahp1p that are formed upon exposure to oxidants; conserved in higher eukaryotes ATP-dependent cysteine sulfinic acid reductase Null: sensitivity to hydroperoxide, overoxidation of Tsa1 catalytic cysteine to the sulfinic acid form |
| YLR225C |                                                                                                                                                                                                                                                                                                                                                                                 |
| YNL141W | [AAH1] Adenine deaminase (adenine aminohydrolase), involved in purine salvage and nitrogen catabolism adenine aminohydrolase (adenine deaminase)                                                                                                                                                                                                                                |
| 0260    | GO_TERM:[molecular_function] P-Value:7.1e-02                                                                                                                                                                                                                                                                                                                                    |
| YGR068C |                                                                                                                                                                                                                                                                                                                                                                                 |
| YBL102W | [SFT2] Non-essential tetra-spanning membrane protein found mostly in the late Golgi, can suppress some sed5 alleles; may be part of the transport machinery, but precise function is unknown; similar to mammalian syntaxin 5 Null mutant is viable; got1 sft2 double mutant exhibits defects in transport to the Golgi complex.                                                |
| YFL058W | [THI5] Protein involved in synthesis of the thiamine precursor hydroxymethylpyrimidine (HMP); member of a subtelomeric gene family including THI5, THI11, THI12, and THI13 thiamine regulated pyrimidine precursor biosynthesis enzyme Null: null mutant viable, no phenotype; thi5, thi11, thi12, thi13 quadruple mutant shows hydroxymethyl pyrimidine auxotrophy             |
| 0261    | GO_TERM:[hydrolase activity] P-Value:1.2e-01                                                                                                                                                                                                                                                                                                                                    |
| YHR146W | [CRP1] Protein that binds to cruciform DNA structures Cruciform DNA binding protein Null: Null mutant is viable and shows no growth defects                                                                                                                                                                                                                                     |
| YDR233C | [RTN1] ER membrane protein that interacts with exocyst subunit Sec6p and with Yip3p; null mutant has an altered (mostly cisternal) ER morphology; has similarity to mammalian reticulon proteins and member of the RTNLA (reticulon-like A) subfamily                                                                                                                           |
| YMR097C | [MTG1] Peripheral GTPase of the mitochondrial inner membrane, essential for respiratory competence, likely functions in assembly of the large ribosomal subunit, has homologs in plants and animals GTPase                                                                                                                                                                      |
| YPL154C | [PEP4] Vacuolar aspartyl protease (proteinase A), required for the posttranslational precursor maturation of vacuolar proteinases; synthesized as a zymogen, self-activates vacuolar proteinase A Null mutant is viable, proteinase deficient, phosphatase deficient; pep4 mutants exhibit a 60-70% reduction in total protein degradation during sporulation                   |
| 0262    | GO_TERM:[guanyl-nucleotide exchange factor complex] P-Value:5.1e-05                                                                                                                                                                                                                                                                                                             |
| YIL047C | [SYG1] Plasma membrane protein of unknown function; truncation and overexpression suppresses lethality of G-alpha protein deficiency plasma membrane protein                                                                                                                                                                                                                    |
| YDR137W | [RGP1] Subunit of a Golgi membrane exchange factor (Ric1p-Rgp1p) that catalyzes nucleotide exchange on Ypt6p reduced growth                                                                                                                                                                                                                                                     |
| YLR039C | [RIC1] Protein involved in retrograde transport to the cis-Golgi network; forms heterodimer with Rgp1p that acts as a GTP exchange factor for Ypt6p; involved in transcription of rRNA and ribosomal protein genes defective in the transcription of both ribosomal protein genes and ribosomal RNA                                                                             |
| 0263    | GO_TERM:[biological_process] P-Value:3.0e-02                                                                                                                                                                                                                                                                                                                                    |
| YOR342C |                                                                                                                                                                                                                                                                                                                                                                                 |
| YLR159W |                                                                                                                                                                                                                                                                                                                                                                                 |
| YPL280W | [HSP32] Possible chaperone and cysteine protease with similarity to E. coli Hsp31 and S. cerevisiae Hsp31p, Hsp33p, and Sno4p; member of the DJ-1/ThiJ/PfpI superfamily, which includes human DJ-1 involved in Parkinson's disease                                                                                                                                              |
| 0264    |                                                                                                                                                                                                                                                                                                                                                                                 |
| YDR441C | [APT2] Apparent pseudogene, not transcribed or translated under normal conditions; encodes a protein with similarity to adenine phosphoribosyltransferase, but artificially expressed protein exhibits no enzymatic activity                                                                                                                                                    |
| YML022W | [APT1] Adenine phosphoribosyltransferase, catalyzes the formation of AMP from adenine and 5-phosphoribosylpyrophosphate; involved in the salvage pathway of purine nucleotide biosynthesis adenine phosphoribosyltransferase                                                                                                                                                    |
| 0265    |                                                                                                                                                                                                                                                                                                                                                                                 |
| YBL098W | [BNA4] Kynurenine 3-mono oxygenase, required for biosynthesis of nicotinic acid from tryptophan via kynurenine pathway Kynurenine 3-mono oxygenase Null: Nicotinic acid auxotroph. Other phenotypes: Deletion of the gene is co-lethal with the deletion of NPT1                                                                                                                |
| YDL226C | [GCS1] ADP-ribosylation factor GTPase activating protein (ARF GAP), involved in ER-Golgi transport; shares functional similarity with Glo3p ADP-ribosylation factor GTPase-activating protein (ARF GAP)                                                                                                                                                                         |
| 0266    | GO_TERM:[retromer complex] P-Value:9.9e-17 OVERLAP:[Vps35/Vps29/Vps26 complex] <260.30.30.10> SIZE:3                                                                                                                                                                                                                                                                            |

|                |                                                                                                                                                                                                                                                                                                                                                                                                                                                                                                                                                                   |
|----------------|-------------------------------------------------------------------------------------------------------------------------------------------------------------------------------------------------------------------------------------------------------------------------------------------------------------------------------------------------------------------------------------------------------------------------------------------------------------------------------------------------------------------------------------------------------------------|
| YOR132W        | [VPS17] Subunit of the membrane-associated retromer complex essential for endosome-to-Golgi retrograde protein transport; peripheral membrane protein that assembles onto the membrane with Vps5p to promote vesicle formation Null mutant is viable, exhibits defect in vacuolar morphology and protein sorting                                                                                                                                                                                                                                                  |
| YOR069W        | [VPS5] Nexin-1 homolog required for localizing membrane proteins from a prevacuolar/late endosomal compartment back to the late Golgi apparatus; structural component of the retromer membrane coat complex; forms a retromer subcomplex with Vps17p similar to sorting nexin I Null mutant missorts and secretes soluble vacuolar proteins, contains fragmented vacuoles, and mislocalizes carboxypeptidase and Vps10p.                                                                                                                                          |
| <b>YJL053W</b> | [PEP8] Vacuolar protein sorting protein that forms part of the multimeric membrane-associated retromer complex along with Vps35p, Vps29p, Vps17p, and Vps5p; essential for endosome-to-Golgi retrograde protein transport vacuolar protein similar to mouse gene H<beta>58 Null mutant is viable but is defective in processing of soluble vacuole proteases due to inability of soluble vacuolar hydrolase to reach the vacuole                                                                                                                                  |
| <b>YHR012W</b> | [VPS29] Endosomal protein that is a subunit of the membrane-associated retromer complex essential for endosome-to-Golgi retrograde transport; forms a subcomplex with Vps35p and Vps26p that selects cargo proteins for endosome-to-Golgi retrieval Defective for sorting of soluble hydrolases to the vacuole. Mislocalisation of the vacuolar hydrolase sorting receptor Vps10p.                                                                                                                                                                                |
| <b>YJL154C</b> | [VPS35] Endosomal protein that is a subunit of the membrane-associated retromer complex essential for endosome-to-Golgi retrograde transport; forms a subcomplex with Vps26p and Vps29p that selects cargo proteins for endosome-to-Golgi retrieval retromer complex component Null mutant is viable, exhibits defects in sorting of vacuolar carboxypeptidase Y, proteinase A, proteinase B, and alkaline phosphatase                                                                                                                                            |
| 0267           | GO_TERM:[pre-autophagosomal structure] P-Value:5.7e-06                                                                                                                                                                                                                                                                                                                                                                                                                                                                                                            |
| YDL113C        | [ATG20] Protein required for transport of aminopeptidase I (Lap4p) through the cytoplasm-to-vacuole targeting pathway; binds phosphatidylinositol-3-phosphate, involved in localization of membranes to the preautophagosome, potential Cdc28p substrate PX domain-containing protein that binds Apg17 and Cvt13, and is required for import of precursor Ape1. Null: The cvt20 mutant accumulates precursor Ape1 but is normal for autophagy.. Other phenotypes: A mutation of a conserved tyrosine to alanine in the PX domain abolishes binding to PtdIns(3)P. |
| YJL036W        | [SNX4] Sorting nexin, involved in the retrieval of late-Golgi SNAREs from the post-Golgi endosome to the trans-Golgi network and in cytoplasm to vacuole transport; contains a PX domain; forms complex with Snx41p and Atg20p Defective in maturation of the vacuolar protein, aminopeptidase I                                                                                                                                                                                                                                                                  |
| 0268           | GO_TERM:[integral to Golgi membrane] P-Value:1.0e-03                                                                                                                                                                                                                                                                                                                                                                                                                                                                                                              |
| YDR100W        | [TVP15] Integral membrane protein localized to late Golgi vesicles along with the v-SNARE Tlg2p integral membrane protein Null: no notable phenotype                                                                                                                                                                                                                                                                                                                                                                                                              |
| YPL095C        | [EEB1] Acyl-coenzymeA:ethanol O-acyltransferase responsible for the major part of short-chain fatty acid ethyl ester production during fermentation Acyl-coenzymeA:ethanol O-acyltransferase                                                                                                                                                                                                                                                                                                                                                                      |
| YHR105W        | [YPT35] Endosomal protein of unknown function that contains a phox (PX) homology domain and binds to both phosphatidylinositol-3-phosphate (PtdIns(3)P) and proteins involved in ER-Golgi or vesicular transport                                                                                                                                                                                                                                                                                                                                                  |
| YDR084C        | [TVP23] Integral membrane protein localized to late Golgi vesicles along with the v-SNARE Tlg2p; green fluorescent protein (GFP)-fusion protein localizes to the cytoplasm in a punctate pattern integral membrane protein Null: no notable phenotype                                                                                                                                                                                                                                                                                                             |
| YGL161C        | [YIP5] Protein that interacts with Rab GTPases; computational analysis of large-scale protein-protein interaction data suggests a possible role in vesicle-mediated transport                                                                                                                                                                                                                                                                                                                                                                                     |
| 0269           | GO_TERM:[Rab-protein geranylgeranyltransferase complex] P-Value:3.5e-07 OVERLAP:[Geranylgeranyltransferase II (GGTase II)] <180.30> SIZE:3                                                                                                                                                                                                                                                                                                                                                                                                                        |
| <b>YOR370C</b> | [MRS6] Rab escort protein, forms a complex with the Ras-like small GTPase Ypt1p that is required for the prenylation of Ypt1p by protein geranylgeranyltransferase type II (Bet2p-Bet4p) rab geranylgeranyltransferase regulatory subunit Null mutant is inviable; multicopy MRS6 causes a mild pet- phenotype; multicopy MRS6 suppresses the pet- phenotype of mrs2-1 mutants; suppresses ts ypt1                                                                                                                                                                |
| <b>YJL031C</b> | [BET4] Alpha subunit of Type II geranylgeranyltransferase required for vesicular transport between the endoplasmic reticulum and the Golgi; provides a membrane attachment moiety to Rab-like proteins Ypt1p and Sec4p geranylgeranyltransferase type II alpha subunit (PGGTase-II, alpha subunit)                                                                                                                                                                                                                                                                |
| <b>YPR176C</b> | [BET2] Beta subunit of Type II geranylgeranyltransferase required for vesicular transport between the endoplasmic reticulum and the Golgi; provides a membrane attachment moiety to Rab-like proteins Ypt1p and Sec4p geranylgeranyltransferase type II beta subunit                                                                                                                                                                                                                                                                                              |
| 0270           | GO_TERM:[vesicle-mediated transport] P-Value:5.6e-09                                                                                                                                                                                                                                                                                                                                                                                                                                                                                                              |
| YKR014C        | [YPT52] GTPase, similar to Ypt51p and Ypt53p and to mammalian rab5; required for vacuolar protein sorting and endocytosis Null mutant is viable; ypt51 ypt52 double deletion exacerbates the temperature sensitivity and vacuolar protein sorting defects of ypt51 deletion                                                                                                                                                                                                                                                                                       |
| YNL093W        | [YPT53] GTPase, similar to Ypt51p and Ypt52p and to mammalian rab5; required for vacuolar protein sorting and endocytosis GTP-binding protein rab family                                                                                                                                                                                                                                                                                                                                                                                                          |
| YOR089C        | [VPS21] GTPase required for transport during endocytosis and for correct sorting of vacuolar hydrolases; localized in endocytic intermediates; detected in mitochondria; geranylgeranylation required for membrane association; mammalian Rab5 homolog small GTP-binding protein Null mutant is viable, temperature-sensitive, missorts multiple vacuolar proteins, accumulate 40-50 nm vesicles, and contain a large vacuole                                                                                                                                     |
| YNL044W        | [YIP3] Protein localized to COPII vesicles, proposed to be involved in ER to Golgi transport; interacts with members of the Rab GTPase family and Yip1p; also interacts with Rtn1p                                                                                                                                                                                                                                                                                                                                                                                |
| YNL263C        | [YIF1] Integral membrane protein required for the fusion of ER-derived COPII transport vesicles with the Golgi; interacts with Yip1p and Yos1p; localizes to the Golgi, the ER, and COPII vesicles                                                                                                                                                                                                                                                                                                                                                                |

|                |                                                                                                                                                                                                                                                                                                                                                                                                                   |
|----------------|-------------------------------------------------------------------------------------------------------------------------------------------------------------------------------------------------------------------------------------------------------------------------------------------------------------------------------------------------------------------------------------------------------------------|
| YGL198W        | [YIP4] Protein that interacts with Rab GTPases; computational analysis of large-scale protein-protein interaction data suggests a possible role in vesicle-mediated transport                                                                                                                                                                                                                                     |
| YGR172C        | [YIP1] Integral membrane protein required for the biogenesis of ER-derived COPII transport vesicles; interacts with Yif1p and Yos1p; localizes to the Golgi, the ER, and COPII vesicles                                                                                                                                                                                                                           |
| 0271           | GO_TERM:[AP-3 adaptor complex] P-Value:5.6e-12 OVERLAP:[AP-3 complex] <260.20.30> SIZE:4                                                                                                                                                                                                                                                                                                                          |
| YGL232W        | [TAN1] Putative tRNA acetyltransferase, RNA-binding protein required for the formation of the modified nucleoside N(4)-acetylcytidine in serine and leucine tRNAs but not required for the same modification in 18S rRNA                                                                                                                                                                                          |
| YPL212C        | [PUS1] tRNA:pseudouridine synthase, introduces pseudouridines at positions 26-28, 34-36, 65, and 67 of tRNA; nuclear protein that appears to be involved in tRNA export; also acts on U2 snRNA tRNA pseudouridine synthase pus1 los1 double mutant exhibits loss of suppressor tRNA activity; pus1, los1 and nsp1 mutations cause synthetic lethality                                                             |
| YBR014C        |                                                                                                                                                                                                                                                                                                                                                                                                                   |
| <b>YBR288C</b> | [APM3] Mu3-like subunit of the clathrin associated protein complex (AP-3); functions in transport of alkaline phosphatase to the vacuole via the alternate pathway clathrin associated protein complex medium subunit Null mutant is viable, even combined with apm1 and apm2                                                                                                                                     |
| <b>YJL024C</b> | [APS3] Small subunit of the clathrin-associated adaptor complex AP-3, which is involved in vacuolar protein sorting; related to the sigma subunit of the mammalian clathrin AP-3 complex; suppressor of loss of casein kinase 1 function Null mutant is viable, rescues yck1,yck2 double mutant                                                                                                                   |
| <b>YGR261C</b> | [APL6] Beta3-like subunit of the yeast AP-3 complex; functions in transport of alkaline phosphatase to the vacuole via the alternate pathway; exists in both cytosolic and peripherally associated membrane-bound pools clathrin assembly complex beta adaptin component (putative) Null mutant is viable, null rescues yck1 yck2 double mutant                                                                   |
| <b>YPL195W</b> | [APL5] Delta adaptin-like subunit of the clathrin associated protein complex (AP-3); functions in transport of alkaline phosphatase to the vacuole via the alternate pathway, suppressor of loss of casein kinase 1 function clathrin assembly complex AP-3 adaptin component delta-like subunit Null mutant is viable, rescues yck1,yck2 double mutant                                                           |
| 0272           | GO_TERM:[biological_process] P-Value:9.6e-02                                                                                                                                                                                                                                                                                                                                                                      |
| YDR266C        |                                                                                                                                                                                                                                                                                                                                                                                                                   |
| YPR114W        |                                                                                                                                                                                                                                                                                                                                                                                                                   |
| 0273           | GO_TERM:[molecular_function] P-Value:1.7e-01                                                                                                                                                                                                                                                                                                                                                                      |
| YMR200W        | [ROT1] Protein that may be involved in cell wall function; mutations in rot1 cause cell wall defects, suppress tor2 mutations, and are synthetically lethal with rot2 mutations membrane protein (putative) Null mutant is inviable; rot1 mutations can suppress tor2 mutations; synthetically lethal with rot2                                                                                                   |
| YOR021C        |                                                                                                                                                                                                                                                                                                                                                                                                                   |
| 0274           | GO_TERM:[conjugation] P-Value:2.9e-03                                                                                                                                                                                                                                                                                                                                                                             |
| YLL043W        | [FPS1] Plasma membrane glycerol channel, member of the major intrinsic protein (MIP) family of channel proteins; involved in efflux of glycerol and in uptake of the trivalent metalloids arsenite and antimonite glycerol channel protein                                                                                                                                                                        |
| YPL192C        | [PRM3] Pheromone-regulated protein required for karyogamy; localizes to the inner membrane of the nuclear envelope                                                                                                                                                                                                                                                                                                |
| 0275           | GO_TERM:[COPI vesicle coat] P-Value:3.5e-22 OVERLAP:[COPI] <260.30.10> SIZE:8                                                                                                                                                                                                                                                                                                                                     |
| YML130C        | [ERO1] Glycoprotein required for oxidative protein folding in the endoplasmic reticulum Null mutant is inviable; in ero1-1(ts) mutants newly synthesized carboxypeptidase Y is retained in the ER and lacks disulfide bonds; ero1 mutants are hypersensitive to the reductant DTT, whereas overexpression of ERO1 confers resistance to DTT, the oxidant diamide can restore growth and secretion in ero1 mutants |
| YAL042W        | [ERV46] Protein localized to COPII-coated vesicles, forms a complex with Erv41p; involved in the membrane fusion stage of transport ER-Golgi transport vesicle protein                                                                                                                                                                                                                                            |
| YBR229C        | [ROT2] Glucosidase II catalytic subunit required for normal cell wall synthesis; mutations in rot2 suppress tor2 mutations, and are synthetically lethal with rot1 mutations glucosidase II Null mutant is inviable; rot2 mutations can suppress tor2 mutations; synthetically lethal with rot1                                                                                                                   |
| YKR067W        | [GPT2] Glycerol-3-phosphate acyltransferase located in both lipid particles and the ER; involved in the stepwise acylation of glycerol-3-phosphate and dihydroxyacetone, which are intermediate steps in lipid biosynthesis glycerol 3-phosphate/dihydroxyacetone phosphate dual substrate-specific sn-1 acyltransferase                                                                                          |
| YER122C        | [GLO3] ADP-ribosylation factor GTPase activating protein (ARF GAP), involved in ER-Golgi transport; shares functional similarity with Gcs1p similar to Gcs1p and Sps18p zinc finger protein                                                                                                                                                                                                                       |
| YML067C        | [ERV41] Protein localized to COPII-coated vesicles, forms a complex with Erv46p; involved in the membrane fusion stage of transport                                                                                                                                                                                                                                                                               |
| <b>YGL137W</b> | [SEC27] Essential beta'-coat protein of the COPI coatomer, involved in ER-to-Golgi and Golgi-to-ER transport; contains WD40 domains that mediate cargo selective interactions; 45% sequence identity to mammalian beta'-COP yeast coatomer beta'-subunit                                                                                                                                                          |

|                  |                                                                                                                                                                                                                                                                                                                                                                                                                                     |
|------------------|-------------------------------------------------------------------------------------------------------------------------------------------------------------------------------------------------------------------------------------------------------------------------------------------------------------------------------------------------------------------------------------------------------------------------------------|
| <b>YNL287W</b>   | [SEC21] Gamma subunit of coatomer, a heptameric protein complex that together with Arf1p forms the COPI coat; involved in ER to Golgi transport of selective cargo PEST sequence-containing protein/non-clathrin coat protein                                                                                                                                                                                                       |
| <b>YIL076W</b>   | [SEC28] Epsilon-COP subunit of the coatomer; regulates retrograde Golgi-to-ER protein traffic; stabilizes Cop1p, the alpha-COP and the coatomer complex; non-essential for cell growth epsilon-COP coatomer subunit                                                                                                                                                                                                                 |
| <b>YDL145C</b>   | [COP1] Alpha subunit of COPI vesicle coatomer complex, which surrounds transport vesicles in the early secretory pathway coatomer complex gamma-alpha-COP alpha subunit Null mutant is inviable; other cop1 alleles show secretion and protein sorting defects                                                                                                                                                                      |
| <b>YDR238C</b>   | [SEC26] Essential beta-coat protein of the COPI coatomer, involved in ER-to-Golgi protein trafficking and maintenance of normal ER morphology; shares 43% sequence identity with mammalian beta-coat protein (beta-COP) yeast coatomer subunit                                                                                                                                                                                      |
| <b>YFR051C</b>   | [RET2] Delta subunit of the coatomer complex (COPI), which coats Golgi-derived transport vesicles; involved in retrograde transport between Golgi and ER ret2-1 mutant is thermosensitive and shows defects in retrieval of dilysine-tagged proteins from the Golgi back to the ER and, at the non-permissive temperature, in forward ER-to-Golgi transport                                                                         |
| <b>YPL010W</b>   | [RET3] Zeta subunit of the coatomer complex (COPI), which coats Golgi-derived transport vesicles; involved in retrograde transport between Golgi and ER vesicle coat component ret3-1 mutant is thermosensitive and shows defects in retrieval of dilysine-tagged proteins from the Golgi back to the ER                                                                                                                            |
| 0276             | GO_TERM:[ER to Golgi transport vesicle] P-Value:3.0e-04                                                                                                                                                                                                                                                                                                                                                                             |
| <b>YFL048C</b>   | [EMP47] Integral membrane component of endoplasmic reticulum-derived COPII-coated vesicles, which function in ER to Golgi transport 47 kDa type I transmembrane protein localized to the Golgi                                                                                                                                                                                                                                      |
| <b>YLR080W</b>   | [EMP46] Integral membrane component of endoplasmic reticulum-derived COPII-coated vesicles, which function in ER to Golgi transport homolog of the Golgi protein Emp47p                                                                                                                                                                                                                                                             |
| 0277             | GO_TERM:[ER to Golgi transport vesicle membrane] P-Value:2.4e-11 OVERLAP:[COPII] <260.30.20> SIZE:11                                                                                                                                                                                                                                                                                                                                |
| <b>YDL195W</b>   | [SEC31] Essential phosphoprotein component (p150) of the COPII coat of secretory pathway vesicles, in complex with Sec13p; required for ER-derived transport vesicle formation COPII coat of secretory pathway vesicles component (p150)                                                                                                                                                                                            |
| <b>YPL085W</b>   | [SEC16] COPII vesicle coat protein required for ER transport vesicle budding and autophagosome formation; Sec16p is bound to the periphery of ER membranes and may act to stabilize initial COPII complexes; interacts with Sec23p, Sec24p and Sec31p vesicle coat component Null mutant is inviable; temperature-sensitive mutants accumulate Kar2 (BiP) and PDI at the nonpermissive temperature.                                 |
| <b>YIL109C</b>   | [SEC24] Component of the Sec23p-Sec24p heterodimeric complex of the COPII vesicle coat; involved in ER to Golgi transport, cargo selection and autophagy; required for the binding of the Sec13 complex to ER membranes; homologous to Lst1p and Lss1p vesicle coat component                                                                                                                                                       |
| <b>YPR181C</b>   | [SEC23] GTPase-activating protein; component of the Sec23p-Sec24p heterodimeric complex of the COPII vesicle coat, involved in ER to Golgi transport and autophagy; stimulates the GDP-bound form of Sar1p GTPase activating protein (GAP) Defective for ER to Golgi transport                                                                                                                                                      |
| 0278             | GO_TERM:[protein amino acid N-linked glycosylation] P-Value:1.0e-03                                                                                                                                                                                                                                                                                                                                                                 |
| <b>YBR205W</b>   | [KTR3] Putative alpha-1,2-mannosyltransferase involved in O- and N-linked protein glycosylation; member of the KRE2/MNT1 mannosyltransferase family alpha-1,2-mannosyltransferase (putative)                                                                                                                                                                                                                                        |
| <b>YHR181W</b>   | [SVP26] Integral membrane protein of the early Golgi apparatus, may function to promote retention of proteins in the early Golgi compartment; mutation affects protein N-glycosylation and cell wall integrity integral membrane protein                                                                                                                                                                                            |
| 0279             | GO_TERM:[Golgi vesicle transport] P-Value:2.2e-19 OVERLAP:[v-SNAREs] <260.50.20> SIZE:8                                                                                                                                                                                                                                                                                                                                             |
| <b>YPL218W</b>   | [SAR1] GTPase, GTP-binding protein of the ARF family, component of COPII coat of vesicles; required for transport vesicle formation during ER to Golgi protein transport ARF family GTP-binding protein Null mutant is inviable. When overexpressed, wild-type SAR1 suppresses a sec12 mutation.                                                                                                                                    |
| <b>YLR026C</b>   | [SED5] cis-Golgi t-SNARE syntaxin required for vesicular transport between the ER and the Golgi complex, binds at least 9 SNARE proteins syntaxin family Null mutant is inviable; cells depleted of Sed5p are unable to transport carboxypeptidase Y to the Golgi complex, and stop growing after a dramatic accumulation of ER                                                                                                     |
| <b>YKL006C-A</b> | [SFT1] Intra-Golgi v-SNARE, required for transport of proteins between an early and a later Golgi compartment v-SNARE                                                                                                                                                                                                                                                                                                               |
| <b>YHL031C</b>   | [GOS1] v-SNARE protein involved in Golgi transport, homolog of the mammalian protein GOS-28/GS28                                                                                                                                                                                                                                                                                                                                    |
| <b>YLR078C</b>   | [BOS1] v-SNARE (vesicle specific SNAP receptor), localized to the endoplasmic reticulum membrane and necessary for vesicular transport from the ER to the Golgi v-SNARE                                                                                                                                                                                                                                                             |
| <b>YIL004C</b>   | [BET1] Type II membrane protein required for vesicular transport between the endoplasmic reticulum and Golgi complex; v-SNARE with similarity to synaptobrevins                                                                                                                                                                                                                                                                     |
| <b>YLR268W</b>   | [SEC22] R-SNARE protein; assembles into SNARE complex with Bet1p, Bos1p and Sed5p; cycles between the ER and Golgi complex; involved in anterograde and retrograde transport between the ER and Golgi; synaptobrevin homolog null mutant is cold and heat sensitive. Defective in ER to Golgi transport.                                                                                                                            |
| <b>YOL086C</b>   | [ADH1] Alcohol dehydrogenase, fermentative isozyme active as homo- or heterotetramers; required for the reduction of acetaldehyde to ethanol, the last step in the glycolytic pathway alcohol dehydrogenase Null mutant is viable and sensitive to formaldehyde.                                                                                                                                                                    |
| <b>YDR189W</b>   | [SLY1] Hydrophilic protein involved in vesicle trafficking between the ER and Golgi; SM (Sec1/Munc-18) family protein that binds the tSNARE Sed5p and stimulates its assembly into a trans-SNARE membrane-protein complex t-SNARE-interacting protein that functions in ER-to-Golgi traffic Null mutant is inviable; SLY1-20, which differs from wild-type SLY1 by a single amino acid, is a single copy suppressor of loss of YPT1 |
| <b>YNL258C</b>   | [DSL1] Endoplasmic reticulum (ER)-localized peripheral membrane protein required for Golgi-to-ER retrograde traffic; component of the ER target site that interacts with coatomer, the major component of the COPI vesicle protein coat                                                                                                                                                                                             |

|                         |                                                                                                                                                                                                                                                                                                                                                                                                                                                                                                                                                                          |
|-------------------------|--------------------------------------------------------------------------------------------------------------------------------------------------------------------------------------------------------------------------------------------------------------------------------------------------------------------------------------------------------------------------------------------------------------------------------------------------------------------------------------------------------------------------------------------------------------------------|
| YLR440C                 | [SEC39] Protein of unknown function proposed to be involved in protein secretion                                                                                                                                                                                                                                                                                                                                                                                                                                                                                         |
| YGL145W                 | [TIP20] Peripheral membrane protein required for fusion of COPI vesicles with the ER, prohibits back-fusion of COPII vesicles with the ER, may act as a sensor for vesicles at the ER membrane transport protein that interacts with Sec20p; required for protein transport from the endoplasmic reticulum to the golgi apparatus                                                                                                                                                                                                                                        |
| YOR075W                 | [UFE1] t-SNARE required for ER membrane fusion and vesicular traffic, integral membrane protein that constitutes with Sec20p and Use1p the trimeric acceptor for R/v-SNAREs on Golgi-derived vesicles at the ER; part of Dsl1p complex t-SNARE (ER)                                                                                                                                                                                                                                                                                                                      |
| YDR498C                 | [SEC20] Membrane glycoprotein v-SNARE involved in retrograde transport from the Golgi to the ER; required for N- and O-glycosylation in the Golgi but not in the ER; forms a complex with the cytosolic Tip20p v-SNARE secretion deficient                                                                                                                                                                                                                                                                                                                               |
| YGL098W                 | [USE1] Essential SNARE protein localized to the ER, involved in retrograde traffic from the Golgi to the ER; forms a complex with the SNAREs Sec22p, Sec20p and Ufe1p                                                                                                                                                                                                                                                                                                                                                                                                    |
| 0280                    | GO_TERM:[GARP complex] P-Value:8.3e-11                                                                                                                                                                                                                                                                                                                                                                                                                                                                                                                                   |
| YMR018W                 |                                                                                                                                                                                                                                                                                                                                                                                                                                                                                                                                                                          |
| YGR142W                 | [BTN2] Cytosolic coiled-coil protein that modulates arginine uptake, interacts with Rhb1p, possible role in mediating pH homeostasis between the vacuole and plasma membrane H(+)-ATPase, may have a role in intracellular protein trafficking                                                                                                                                                                                                                                                                                                                           |
| YBR164C                 | [ARL1] Soluble GTPase with a role in regulation of membrane traffic; regulates potassium influx; G protein of the Ras superfamily, similar to ADP-ribosylation factor ADP-ribosylation factor-like protein 1                                                                                                                                                                                                                                                                                                                                                             |
| YOL018C                 | [TLG2] Syntaxin-like t-SNARE that forms a complex with Tlg1p and Vti1p and mediates fusion of endosome-derived vesicles with the late Golgi; binds Vps45p, which prevents Tlg2p degradation and also facilitates t-SNARE complex formation tSNARE that affects a late Golgi compartment Null mutant is viable in SEY6210, exhibits endocytosis defect and loss of Kex2p                                                                                                                                                                                                  |
| YBL017C                 | [PEP1] Type I transmembrane sorting receptor for multiple vacuolar hydrolases; cycles between the late-Golgi and prevacuolar endosome-like compartments Type I integral membrane protein 166aa cytoplasmic tail, 1300 aa luminal domain proteinase deficient                                                                                                                                                                                                                                                                                                             |
| YJL034W                 | [KAR2] ATPase involved in protein import into the ER, also acts as a chaperone to mediate protein folding in the ER and may play a role in ER export of soluble proteins; regulates the unfolded protein response via interaction with Ire1p HSP70 family/mammalian BiP (GRP78 or HSPA5) homolog null mutants are inviable; other mutants block karyogamy (nuclear fusion) during mating                                                                                                                                                                                 |
| YDR468C                 | [TLG1] Essential t-SNARE that forms a complex with Tlg2p and Vti1p and mediates fusion of endosome-derived vesicles with the late Golgi; binds the docking complex VFT (Vps fifty-three) through interaction with Vps51p tSNARE that affects a late Golgi compartment Endocytosis defect and loss of Kex2p in SEY6210 background; Deletion may be lethal in some genetic backgrounds                                                                                                                                                                                     |
| YDR027C                 | [VPS54] Component of the GARP (Golgi-associated retrograde protein) complex, Vps51p-Vps52p-Vps53p-Vps54p, which is required for the recycling of proteins from endosomes to the late Golgi; potentially phosphorylated by Cdc28p Null mutant exhibits disrupted vacuole and conditional defects in microtubule assembly and cell growth; accumulates 20-50 acidic vesicles per cell that contain CPY, ALP and VMA subunits; sensitive to Mn, Zn, Cu, high pH, hygromycin, Cd, high temp (37C), low temp (14C) and FK506.                                                 |
| YKR020W                 | [VPS51] Component of the GARP (Golgi-associated retrograde protein) complex, Vps51p-Vps52p-Vps53p-Vps54p, which is required for the recycling of proteins from endosomes to the late Golgi; links the (VFT/GARP) complex to the SNARE Tlg1p function unknown Null: small critical cell size                                                                                                                                                                                                                                                                              |
| YDR484W                 | [VPS52] Component of the GARP (Golgi-associated retrograde protein) complex, Vps51p-Vps52p-Vps53p-Vps54p, which is required for the recycling of proteins from endosomes to the late Golgi; involved in localization of actin and chitin Null mutant is viable, cold-sensitive growth phenotype, suppressor of actin mutation; aberrant organization of intracellular actin and deposition of chitin at the cell surface                                                                                                                                                 |
| YJL029C                 | [VPS53] Component of the GARP (Golgi-associated retrograde protein) complex, Vps51p-Vps52p-Vps53p-Vps54p, which is required for the recycling of proteins from endosomes to the late Golgi; required for vacuolar protein sorting hydrophilic protein that is peripherally associated with the late Golgi and forms a stable complex with Vps52p and Vps54p Null mutant is viable but is defective for growth at 37°C. vps53 null mutants have fragmented vacuoles, missort and secrete CPY, and mislocalize late Golgi membrane proteins to the vacuole.                |
| 0281                    | GO_TERM:[SNAP receptor activity] P-Value:1.2e-12 OVERLAP:[v-SNAREs] <260.50.20> SIZE:8                                                                                                                                                                                                                                                                                                                                                                                                                                                                                   |
| YLR351C                 | [NIT3] Nit protein, one of two proteins in <i>S. cerevisiae</i> with similarity to the Nit domain of NitFhit from fly and worm and to the mouse and human Nit protein which interacts with the Fhit tumor suppressor; nitrilase superfamily member                                                                                                                                                                                                                                                                                                                       |
| YMR017W                 | [SPO20] Meiosis-specific subunit of the t-SNARE complex, required for prospore membrane formation during sporulation; similar to but not functionally redundant with Sec9p; SNAP-25 homolog SNAP 25 homolog Null mutant is viable, other mutant fails to form spores                                                                                                                                                                                                                                                                                                     |
| YPR032W                 | [SRO7] Protein with roles in exocytosis and cation homeostasis; functions in docking and fusion of post-Golgi vesicles with plasma membrane; homolog of Sro77p and <i>Drosophila</i> lethal giant larvae tumor suppressor; interacts with SNARE protein Sec9p yeast homolog of the <i>Drosophila</i> tumor suppressor, lethal giant larvae Null mutant is viable but is cs- in combination with sni2(YBL106c) null; sni1 sni2 double mutant has exocytic defect, accumulating post-Golgi vesicles. Acts as a multicopy suppressor of rho3.                               |
| <a href="#">YOR327C</a> | [SNC2] Vesicle membrane receptor protein (v-SNARE) involved in the fusion between Golgi-derived secretory vesicles with the plasma membrane; member of the synaptobrevin/VAMP family of R-type v-SNARE proteins vesicle-associated membrane protein (synaptobrevin) homolog Null mutant is viable, snc1 snc2 double mutants are deficient in normal bulk secretion, accumulate large numbers of post-Golgi vesicles, and display a variety of conditional lethal phenotypes                                                                                              |
| YDR164C                 | [SEC1] Sm-like protein involved in docking and fusion of exocytic vesicles through binding to assembled SNARE complexes at the membrane; localization to sites of secretion (bud neck and bud tip) is dependent on SNARE function SNARE docking complex subunit (putative) accumulates secretory vesicles                                                                                                                                                                                                                                                                |
| <a href="#">YAL030W</a> | [SNC1] Vesicle membrane receptor protein (v-SNARE) involved in the fusion between Golgi-derived secretory vesicles with the plasma membrane; proposed to be involved in endocytosis; member of the synaptobrevin/VAMP family of R-type v-SNARE proteins Snc2p homolog/synaptobrevin homolog Null mutant is viable; snc1 snc2 mutants are deficient in normal bulk secretion, accumulate large numbers of post-Golgi vesicles, and display a variety of conditional lethal phenotypes; snc1 mutations suppress loss of cap in strains possessing an activated ras2 allele |

|         |                                                                                                                                                                                                                                                                                                                                                                                                                                                                                                                                                                                    |
|---------|------------------------------------------------------------------------------------------------------------------------------------------------------------------------------------------------------------------------------------------------------------------------------------------------------------------------------------------------------------------------------------------------------------------------------------------------------------------------------------------------------------------------------------------------------------------------------------|
| YGR009C | [SEC9] t-SNARE protein important for fusion of secretory vesicles with the plasma membrane; similar to but not functionally redundant with Spo20p; SNAP-25 homolog t-SNARE (putative) accumulates secretory vesicles An uncharacterized allele accumulates 100nm secretory vesicles and berkeley bodies and is defective in proteint transport to the cell surface. The sec9-4 allele has diploid-specific bud site selection defects.                                                                                                                                             |
| YPL232W | [SSO1] Plasma membrane t-SNARE involved in fusion of secretory vesicles at the plasma membrane; forms a complex, with t-SNARE Sec9p, that binds v-SNARE Snc2p; also required for sporulation; syntaxin homolog that is functionally redundant with Sso2p t-SNARE SSO1, SSO2 double null mutant is inviable; high copy number of either SSO1 or SSO2 suppresses mutations in late-acting sec genes (sec1,3,5,9,15)                                                                                                                                                                  |
| YMR183C | [SSO2] Plasma membrane t-SNARE involved in fusion of secretory vesicles at the plasma membrane; syntaxin homolog that is functionally redundant with Sso1p t-SNARE SSO1, SSO2 double null mutant is inviable; high copy number of either SSO1 or SSO2 suppresses mutations in late-acting sec genes (sec1,3,5,9,15)                                                                                                                                                                                                                                                                |
| YNR049C | [MSO1] Probable component of the secretory vesicle docking complex, acts at a late step in secretion; shows genetic and physical interactions with Sec1p and is enriched in microsomal membrane fractions; required for sporulation Null mutant is viable, exhibits accumulation of secretory vesicles in the bud; mso1 null mutants exhibit double mutant inviability in combinaiton with sec1, sec2, and sec4 mutants                                                                                                                                                            |
| 0282    | GO_TERM:[membrane fusion] P-Value:3.6e-42 OVERLAP:[Exocyst complex] <160> SIZE:7                                                                                                                                                                                                                                                                                                                                                                                                                                                                                                   |
| YBR200W | [BEM1] Protein containing SH3-domains, involved in establishing cell polarity and morphogenesis; functions as a scaffold protein for complexes that include Cdc24p, Ste5p, Ste20p, and Rsr1p Null mutant is viable; exhibits a defect in polarization in vegetative cells, exhibits decreased expression of FUS1                                                                                                                                                                                                                                                                   |
| YLR166C | [SEC10] Essential 100kDa subunit of the exocyst complex (Sec3p, Sec5p, Sec6p, Sec8p, Sec10p, Sec15p, Exo70p, and Exo84p), which has the essential function of mediating polarized targeting of secretory vesicles to active sites of exocytosis exocyst complex component accumulates secretory vesicles                                                                                                                                                                                                                                                                           |
| YDR166C | [SEC5] Essential 107kDa subunit of the exocyst complex (Sec3p, Sec5p, Sec6p, Sec8p, Sec10p, Sec15p, Exo70p, and Exo84p), which has the essential function of mediating polarized targeting of secretory vesicles to active sites of exocytosis exocyst complex component secretion deficient; Null is inviable accumulates secretory vesicles                                                                                                                                                                                                                                      |
| YIL068C | [SEC6] Essential 88kDa subunit of the exocyst complex (Sec3p, Sec5p, Sec6p, Sec8p, Sec10p, Sec15p, Exo70p, and Exo84p), which has the essential function of mediating polarized targeting of secretory vesicles to active sites of exocytosis exocyst complex component lethal accumulates secretory vesicles                                                                                                                                                                                                                                                                      |
| YGL233W | [SEC15] Essential 113kDa subunit of the exocyst complex (Sec3p, Sec5p, Sec6p, Sec8p, Sec10p, Sec15p, Exo70p, and Exo84p), which mediates polarized targeting of vesicles to active sites of exocytosis; Sec15p associates with Sec4p and vesicles exocyst complex component accumulates secretory vesicles The sec15-1 allele exhibits temperature-sensitive growth and defects in the secretory pathway.                                                                                                                                                                          |
| YPR055W | [SEC8] Essential 121kDa subunit of the exocyst complex (Sec3p, Sec5p, Sec6p, Sec8p, Sec10p, Sec15p, Exo70p, and Exo84p), which has the essential function of mediating polarized targeting of secretory vesicles to active sites of exocytosis exocyst complex component secretion deficient accumulates secretory vesicles                                                                                                                                                                                                                                                        |
| YBR102C | [EXO84] Essential protein with dual roles in spliceosome assembly and exocytosis; the exocyst complex (Sec3p, Sec5p, Sec6p, Sec8p, Sec10p, Sec15p, Exo70p, and Exo84p) mediates polarized targeting of secretory vesicles to active sites of exocytosis exocyst complex component spliceosome assembly protein Null mutant is inviable, defective in secretion                                                                                                                                                                                                                     |
| YER008C | [SEC3] Non-essential subunit of the exocyst complex (Sec3p, Sec5p, Sec6p, Sec8p, Sec10p, Sec15p, Exo70p, Exo84p) which mediates targeting of post-Golgi vesicles to sites of active exocytosis; Sec3p specifically is a spatial landmark for secretion exocyst complex component accumulates secretory vesicles                                                                                                                                                                                                                                                                    |
| YJL085W | [EXO70] Essential 70kDa subunit of the exocyst complex (Sec3p, Sec5p, Sec6p, Sec8p, Sec10p, Sec15p, Exo70p, and Exo84p), which has the essential function of mediating polarized targeting of secretory vesicles to active sites of exocytosis exocyst complex component                                                                                                                                                                                                                                                                                                           |
| YBR080C | [SEC18] ATPase required for the release of Sec17p during the 'priming' step in homotypic vacuole fusion and for ER to Golgi transport; homolog of the mammalian NSF ATPase NSF protein involved in protein transport between ER and Golgi                                                                                                                                                                                                                                                                                                                                          |
| YDR323C | [PEP7] Multivalent adaptor protein that facilitates vesicle-mediated vacuolar protein sorting by ensuring high-fidelity vesicle docking and fusion, which are essential for targeting of vesicles to the endosome; required for vacuole inheritance three zinc fingers; cysteine rich regions of amino acids are essential for function Null mutant is viable but grows more slowly and is temperature-sensitive; defective in vacuole segregation; mislocalizes carboxypeptidase Y and other vacuolar proteins; shows loss of vacuolar acidity and defects in vacuolar morphology |
| YDR264C | [AKR1] Palmitoyl transferase involved in protein palmitoylation; acts as a negative regulator of pheromone response pathway; required for endocytosis of pheromone receptors; involved in cell shape control; contains ankyrin repeats ankyrin repeat-containing protein Null mutant is viable, exhibits slow growth, abnormal morphology, and partial activation of pheromone response; defective for endocytosis of Ste2p and Ste3p                                                                                                                                              |
| YAL014C | [SYN8] Endosomal SNARE related to mammalian syntaxin 8 syntaxin family                                                                                                                                                                                                                                                                                                                                                                                                                                                                                                             |
| YEL013W | [VAC8] Phosphorylated vacuolar membrane protein that interacts with Atg13p, required for the cytoplasm-to-vacuole targeting (Cvt) pathway; interacts with Nvj1p to form nucleus-vacuole junctions Defective in vacuole inheritance and aminopeptidase I targeting to the vacuole                                                                                                                                                                                                                                                                                                   |
| YOR036W | [PEP12] Target membrane receptor (t-SNARE) for vesicular intermediates traveling between the Golgi apparatus and the vacuole; controls entry of biosynthetic, endocytic, and retrograde traffic into the prevacuolar compartment; syntaxin c-terminal TMD integral membrane protein proteinase deficient                                                                                                                                                                                                                                                                           |
| YGL095C | [VPS45] Protein of the Sec1p/Munc-18 family, essential for vacuolar protein sorting; required for the function of Pep12p and the early endosome/late Golgi SNARE Tlg2p; essential for fusion of Golgi-derived vesicles with the prevacuolar compartment Null mutant is viable, defective in the segregation of vacuolar material into the developing daughter cell, has large central vacuoles                                                                                                                                                                                     |
| YBL050W | [SEC17] Peripheral membrane protein required for vesicular transport between ER and Golgi and for the 'priming' step in homotypic vacuole fusion, part of the cis-SNARE complex; has similarity to alpha-SNAP secretion deficient                                                                                                                                                                                                                                                                                                                                                  |
| YAL002W | [VPS8] Membrane-associated hydrophilic protein that interacts with the small GTPase, Vps21p, to facilitate soluble vacuolar protein localization; required for localization and trafficking of the CPY sorting receptor; contains a RING finger motif membrane-associated hydrophilic protein which contains a C-terminal cysteine-rich region that conforms to the H2 variant of the RING finger Zn2+ binding motif Null mutant is viable, missorts and secretes vacuolar hydrolases, overexpression of VPS21 partially suppresses vps8 null                                      |

|         |                                                                                                                                                                                                                                                                                                                                                                                                                                                                                                                                                                                                                                                                     |
|---------|---------------------------------------------------------------------------------------------------------------------------------------------------------------------------------------------------------------------------------------------------------------------------------------------------------------------------------------------------------------------------------------------------------------------------------------------------------------------------------------------------------------------------------------------------------------------------------------------------------------------------------------------------------------------|
| YBR131W | [CCZ1] Protein involved in vacuolar assembly, essential for autophagy and the cytoplasm-to-vacuole pathway Null mutant is viable, but is sensitive to caffeine, calcium and zinc; no sporulation in homozygous null diploids                                                                                                                                                                                                                                                                                                                                                                                                                                        |
| YGL124C | [MON1] Protein required for fusion of cvt-vesicles and autophagosomes with the vacuole; associates, as a complex with Ccz1p, with a perivacuolar compartment; potential Cdc28p substrate null mutant is sensitive to monensin and brefeldin A                                                                                                                                                                                                                                                                                                                                                                                                                       |
| YKL196C | [YKT6] Vesicle membrane protein (v-SNARE) with acyltransferase activity; involved in trafficking to and within the Golgi, endocytic trafficking to the vacuole, and vacuolar fusion; membrane localization due to prenylation at the carboxy-terminus v-SNARE Null mutant is inviable. Depletion of Ykt6p results in the accumulation of the p1 precursor (endoplasmic reticulum form) of the vacuolar enzyme carboxypeptidase Y and morphological abnormalities consistent with a defect in secretion.                                                                                                                                                             |
| YLR093C | [NYV1] v-SNARE component of the vacuolar SNARE complex involved in vesicle fusion; inhibits ATP-dependent Ca(2+) transport activity of Pmc1p in the vacuolar membrane vacuolar v-SNARE                                                                                                                                                                                                                                                                                                                                                                                                                                                                              |
| YML001W | [YPT7] GTPase; GTP-binding protein of the rab family; required for homotypic fusion event in vacuole inheritance, for endosome-endosome fusion, similar to mammalian Rab7 GTP-binding protein rab family Null mutant is viable, characterized by highly fragmented vacuoles and differential defects of vacuolar transport and maturation                                                                                                                                                                                                                                                                                                                           |
| YGL212W | [VAM7] Component of the vacuole SNARE complex involved in vacuolar morphogenesis; SNAP-25 homolog; functions with a syntaxin homolog Vam3p in vacuolar protein trafficking heptad repeat motif hydrophilic protein Null mutant is viable, exhibits prominent large vacuoles                                                                                                                                                                                                                                                                                                                                                                                         |
| YMR197C | [VTI1] Protein involved in cis-Golgi membrane traffic; v-SNARE that interacts with two t-SNARES, Sed5p and Pep12p; required for multiple vacuolar sorting pathways interacts with two t-SNARES, Sed5p and Pep12p v-SNARE                                                                                                                                                                                                                                                                                                                                                                                                                                            |
| YLR148W | [PEP3] Vacuolar peripheral membrane protein that promotes vesicular docking/fusion reactions in conjunction with SNARE proteins, required for vacuolar biogenesis, forms complex with Pep5p that mediates protein transport to the vacuole vacuolar membrane protein Null mutant is viable, exhibits growth defects at 37 degrees celsius, exhibits vacuolar protein sorting and processing and defects, exhibits decreased levels of protease A, protease B, and carboxylpeptidase Y antigens; decreased repressible alkaline phosphatase activity; null mutants contain very few normal vacuolelike organelles; homozygous null mutants are sporulation defective |
| YOR106W | [VAM3] Syntaxin-related protein required for vacuolar assembly; functions with Vam7p in vacuolar protein trafficking; member of the syntaxin family of proteins syntaxin family Null mutant is viable, defective in processing of vacuolar hydrolases.                                                                                                                                                                                                                                                                                                                                                                                                              |
| YDR080W | [VPS41] Vacuolar membrane protein that is a subunit of the homotypic vacuole fusion and vacuole protein sorting (HOPS) complex; essential for membrane docking and fusion at the Golgi-to-endosome and endosome-to-vacuole stages of protein transport Null mutant is viable, associated with fragmented vacuoles, exhibits defective high affinity transport due to impaired Fet3p activity and also exhibits defects in the processing and sorting of multiple vacuolar hydrolases                                                                                                                                                                                |
| YDL077C | [VAM6] Vacuolar protein that plays a critical role in the tethering steps of vacuolar membrane fusion by facilitating guanine nucleotide exchange on small guanosine triphosphatase Ypt7p Null mutant is viable but exhibits defects in processing vacuolar proteases and in maturation of vacuolar alkaline phosphatase. Mutants also exhibit a defective vacuolar morphology; they contain several small vesicles that stain with vacuolar markers.                                                                                                                                                                                                               |
| YLR396C | [VPS33] ATP-binding protein that is a subunit of the homotypic vacuole fusion and vacuole protein sorting (HOPS) complex; essential for membrane docking and fusion at both the Golgi-to-endosome and endosome-to-vacuole stages of protein transport temperature sensitive, defective vacuolar morphology and protein localization, methionine auxotroph                                                                                                                                                                                                                                                                                                           |
| YMR231W | [PEP5] Peripheral vacuolar membrane protein required for protein trafficking and vacuole biogenesis; forms complex with Pep3p that promotes vesicular docking/fusion reactions in conjunction with SNARE proteins, also interacts with Pep7p Zn-finger protein (putative)                                                                                                                                                                                                                                                                                                                                                                                           |
| YPL045W | [VPS16] Subunit of the homotypic vacuole fusion and vacuole protein sorting (HOPS) complex; part of the Class C Vps complex essential for membrane docking and fusion at both the Golgi-to-endosome and endosome-to-vacuole stages of protein transport Null mutant is viable, has a severe defect in vacuolar protein sorting, is temperature sensitive for growth, displays grossly abnormal vacuolar morphology, and possesses a defect in alpha-factor processing                                                                                                                                                                                               |
| 0283    |                                                                                                                                                                                                                                                                                                                                                                                                                                                                                                                                                                                                                                                                     |
| YBL060W |                                                                                                                                                                                                                                                                                                                                                                                                                                                                                                                                                                                                                                                                     |
| YMR214W | [SCJ1] One of several homologs of bacterial chaperone DnaJ, located in the ER lumen where it cooperates with Kar2p to mediate maturation of proteins DnaJ homolog Null mutant is viable but exhibits defects in protein sorting and sensitivity to tunicamycin.                                                                                                                                                                                                                                                                                                                                                                                                     |
| 0284    | GO_TERM:[storage vacuole] P-Value:6.4e-02                                                                                                                                                                                                                                                                                                                                                                                                                                                                                                                                                                                                                           |
| YCL004W | [PGS1] Phosphatidylglycerolphosphate synthase, catalyzes the synthesis of phosphatidylglycerolphosphate from CDP-diacylglycerol and sn-glycerol 3-phosphate in the first committed and rate-limiting step of cardiolipin biosynthesis 17 kDa phosphatidylglycerolphosphate synthase Null mutant is viable but is synthetically lethal with cho1 and mitochondrial petite mutations; nonviable at higher temperatures; cannot utilize glycerol and ethanol on synthetic media; cannot survive ethidium bromide mutagenesis; contains low levels of cardiolipin, phosphatidylglycerol and phosphatidylcholine but increased levels of phosphatidylinositol            |
| YOL028C | [YAP7] Putative basic leucine zipper (bZIP) transcription factor basic leucine zipper (bZIP) transcription factor                                                                                                                                                                                                                                                                                                                                                                                                                                                                                                                                                   |
| YBL095W |                                                                                                                                                                                                                                                                                                                                                                                                                                                                                                                                                                                                                                                                     |
| YBR162C | [TOS1] Covalently-bound cell wall protein of unknown function; identified as a cell cycle regulated SBF target gene; deletion mutants are highly resistant to treatment with beta-1,3-glucanase; has sequence similarity to YJL171C                                                                                                                                                                                                                                                                                                                                                                                                                                 |
| YNL217W |                                                                                                                                                                                                                                                                                                                                                                                                                                                                                                                                                                                                                                                                     |
| 0285    | GO_TERM:[biological_process] P-Value:2.9e-03                                                                                                                                                                                                                                                                                                                                                                                                                                                                                                                                                                                                                        |
| YDR348C |                                                                                                                                                                                                                                                                                                                                                                                                                                                                                                                                                                                                                                                                     |

|         |                                                                                                                                                                                                                                                                                                                                                                                                                                                                   |
|---------|-------------------------------------------------------------------------------------------------------------------------------------------------------------------------------------------------------------------------------------------------------------------------------------------------------------------------------------------------------------------------------------------------------------------------------------------------------------------|
| YMR295C |                                                                                                                                                                                                                                                                                                                                                                                                                                                                   |
| YDL123W | [SNA4] Protein of unknown function, localized to the vacuolar outer membrane                                                                                                                                                                                                                                                                                                                                                                                      |
| YDL114W |                                                                                                                                                                                                                                                                                                                                                                                                                                                                   |
| YLR040C |                                                                                                                                                                                                                                                                                                                                                                                                                                                                   |
| 0286    | GO_TERM:[RNA metabolism] P-Value:2.0e-01                                                                                                                                                                                                                                                                                                                                                                                                                          |
| YFL021W | [GAT1] Transcriptional activator of genes involved in nitrogen catabolite repression, member of the GATA family of DNA binding proteins; activity and localization regulated by nitrogen limitation and Ure2p transcriptional activator with GATA-1-type Zn finger DNA-binding motif                                                                                                                                                                              |
| YLR068W | [FYV7] Protein of unknown function, required for survival upon exposure to K1 killer toxin; involved in processing the 35S rRNA primary transcript to generate the 20S and 27SA2 pre-rRNA transcripts                                                                                                                                                                                                                                                             |
| 0287    |                                                                                                                                                                                                                                                                                                                                                                                                                                                                   |
| YJL165C | [HAL5] Putative protein kinase; overexpression increases sodium and lithium tolerance, whereas gene disruption increases cation and low pH sensitivity and impairs potassium uptake, suggesting a role in regulation of Trk1p and/or Trk2p transporters                                                                                                                                                                                                           |
| YOL122C | [SMF1] Divalent metal ion transporter with a broad specificity for di-valent and tri-valent metals; post-translationally regulated by levels of metal ions; member of the Nramp family of metal transport proteins                                                                                                                                                                                                                                                |
| 0288    | GO_TERM:[amino acid biosynthesis] P-Value:2.0e-02                                                                                                                                                                                                                                                                                                                                                                                                                 |
| YDR007W | [TRP1] Phosphoribosylanthranilate isomerase that catalyzes the third step in tryptophan biosynthesis; in 2004, the sequence of TRP1 from strain S228C was updated by changing the previously annotated internal STOP (TAA) to serine (TCA) N-(5'-phosphoribosyl)-anthranilate isomerase                                                                                                                                                                           |
| YOR242C | [SSP2] Sporulation specific protein that localizes to the spore wall; required for sporulation at a point after meiosis II and during spore wall formation; SSP2 expression is induced midway in meiosis Null mutant is viable, fails to sporulate                                                                                                                                                                                                                |
| YEL064C | [AVT2] Putative transporter, member of a family of seven S. cerevisiae genes (AVT1-7) related to vesicular GABA-glycine transporters transporter                                                                                                                                                                                                                                                                                                                  |
| YIR034C | [LYS1] Saccharopine dehydrogenase (NAD <sup>+</sup> , L-lysine-forming), catalyzes the conversion of saccharopine to L-lysine, which is the final step in the lysine biosynthesis pathway Lysine requiring                                                                                                                                                                                                                                                        |
| 0289    | GO_TERM:[transaldolase activity] P-Value:4.6e-07                                                                                                                                                                                                                                                                                                                                                                                                                  |
| YNL053W | [MSG5] Dual-specificity protein phosphatase required for maintenance of a low level of signaling through the cell integrity pathway; regulates and is regulated by Slt2p; also required for adaptive response to pheromone protein tyrosine phosphatase Null mutant is viable, shows diminished adaptive response to pheromone                                                                                                                                    |
| YGR043C |                                                                                                                                                                                                                                                                                                                                                                                                                                                                   |
| YLR354C | [TAL1] Transaldolase, enzyme in the non-oxidative pentose phosphate pathway; converts sedoheptulose 7-phosphate and glyceraldehyde 3-phosphate to erythrose 4-phosphate and fructose 6-phosphate transaldolase, enzyme in the pentose phosphate pathway                                                                                                                                                                                                           |
| 0290    | GO_TERM:[plasma membrane] P-Value:4.3e-02                                                                                                                                                                                                                                                                                                                                                                                                                         |
| YJL068C |                                                                                                                                                                                                                                                                                                                                                                                                                                                                   |
| YOL017W | [ESC8] Protein involved in telomeric and mating-type locus silencing, interacts with Sir2p and also interacts with the Gal11p, which is a component of the RNA pol II mediator complex Null: Viable, HMR silencing defect                                                                                                                                                                                                                                         |
| YCR021C | [HSP30] Hydrophobic plasma membrane localized, stress-responsive protein that negatively regulates the H(+)-ATPase Pma1p; induced by heat shock, ethanol treatment, weak organic acid, glucose limitation, and entry into stationary phase                                                                                                                                                                                                                        |
| YKL220C | [FRE2] Ferric reductase and cupric reductase, reduces siderophore-bound iron and oxidized copper prior to uptake by transporters; expression induced by low iron levels but not by low copper levels ferric reductase                                                                                                                                                                                                                                             |
| 0291    | GO_TERM:[protein kinase activity] P-Value:3.1e-04                                                                                                                                                                                                                                                                                                                                                                                                                 |
| YKL126W | [YPK1] Serine/threonine protein kinase required for receptor-mediated endocytosis; involved in sphingolipid-mediated and cell integrity signaling pathways; localized to the bud neck, cytosol and plasma membrane; homolog of mammalian kinase SGK 76.5 kDa serine/threonine protein kinase similarity to protein kinase C, is 90% identical to Ypk2p Null mutant is viable, slow growing, ypk1 ypk2 double deletion mutants are defective for vegetative growth |
| YMR104C | [YPK2] Protein kinase with similarity to serine/threonine protein kinase Ypk1p; functionally redundant with YPK1 at the genetic level; participates in a signaling pathway required for optimal cell wall integrity; homolog of mammalian kinase SGK protein kinase                                                                                                                                                                                               |
| YIR044C |                                                                                                                                                                                                                                                                                                                                                                                                                                                                   |

|         |                                                                                                                                                                                                                                                                                                                                                                                                                                                                                 |
|---------|---------------------------------------------------------------------------------------------------------------------------------------------------------------------------------------------------------------------------------------------------------------------------------------------------------------------------------------------------------------------------------------------------------------------------------------------------------------------------------|
| YDR490C | [PKH1] Serine/threonine protein kinase involved in sphingolipid-mediated signaling pathway that controls endocytosis; activates Ypk1p and Ykr2p, components of signaling cascade required for maintenance of cell wall integrity; redundant with Pkh2p Null mutant is viable; pkh1, pkh2 double mutant is lethal                                                                                                                                                                |
| YLR466W | [YRF1-4] Helicase encoded by the Y' element of subtelomeric regions, highly expressed in the mutants lacking the telomerase component TLC1; potentially phosphorylated by Cdc28p Y'-helicase protein 1                                                                                                                                                                                                                                                                          |
| 0292    | GO_TERM:[molecular_function] P-Value:7.1e-02                                                                                                                                                                                                                                                                                                                                                                                                                                    |
| YER067W |                                                                                                                                                                                                                                                                                                                                                                                                                                                                                 |
| YBL001C | [ECM15] Non-essential protein of unknown function, likely exists as tetramer, may be regulated by the binding of small-molecule ligands (possibly sulfate ions), may have a role in yeast cell-wall biogenesis A Tn3 insertion into this gene causes hypersensitivity to the cell surface polymer perturbing agent calcofluor white.                                                                                                                                            |
| YPL068C |                                                                                                                                                                                                                                                                                                                                                                                                                                                                                 |
| 0293    | GO_TERM:[biological_process] P-Value:2.3e-01                                                                                                                                                                                                                                                                                                                                                                                                                                    |
| YFL010C | [WWM1] WW domain containing protein of unknown function; binds to Mca1p, a caspase-related protease that regulates H <sub>2</sub> O <sub>2</sub> -induced apoptosis; overexpression causes G <sub>1</sub> phase growth arrest and clonal death that is suppressed by overexpression of MCA1 Other phenotypes: overexpression inhibits growth                                                                                                                                    |
| YJL162C | [JJJ2] Protein of unknown function, contains a J-domain, which is a region with homology to the E. coli DnaJ protein                                                                                                                                                                                                                                                                                                                                                            |
| YPL059W | [GRX5] Hydroperoxide and superoxide-radical responsive glutathione-dependent oxidoreductase; mitochondrial matrix protein involved in the synthesis/assembly of iron-sulfur centers; monothiol glutaredoxin subfamily member along with Grx3p and Grx4p glutaredoxin Null mutant is viable and shows high sensitivity to oxidative stress and increased sensitivity to osmotic stress, and increased oxidation levels of cell proteins; grx5 is synthetically lethal with grx2. |
| 0294    | GO_TERM:[transcription regulator activity] P-Value:2.1e-03                                                                                                                                                                                                                                                                                                                                                                                                                      |
| YIR023W | [DAL81] Positive regulator of genes in multiple nitrogen degradation pathways; contains DNA binding domain but does not appear to bind the dodecanucleotide sequence present in the promoter region of many genes involved in allantoin catabolism transcriptional activator for allantoin and GABA catabolic genes, contains a Zn[2]-Cys[6] fungal-type binuclear cluster domain in the N-terminal region Null mutant is viable, unable to degrade allantoin                   |
| YNL314W | [DAL82] Positive regulator of allophanate inducible genes; binds a dodecanucleotide sequence upstream of all genes that are induced by allophanate; contains an UISALL DNA-binding, a transcriptional activation, and a coiled-coil domain positive transcriptional regulator loss of induction for allantoin degradation pathways                                                                                                                                              |
| 0295    | GO_TERM:[TORC 1 complex] P-Value:5.0e-08                                                                                                                                                                                                                                                                                                                                                                                                                                        |
| YER040W | [GLN3] Transcriptional activator of genes regulated by nitrogen catabolite repression (NCR), localization and activity regulated by quality of nitrogen source transcriptional activator of nitrogen-regulated genes                                                                                                                                                                                                                                                            |
| YNL229C | [URE2] Nitrogen catabolite repression regulator that acts by inhibition of GLN3 transcription in good nitrogen source; altered form of Ure2p creates [URE3] prion prion/transcriptional regulator Null mutant is viable but exhibits defects in nitrogen catabolite repression (NCR), and null mutant diploids are defective in pseudohyphal growth and display an increased incidence of random bud patterns.                                                                  |
| YJR066W | [TOR1] PIK-related protein kinase and rapamycin target; subunit of TORC1, a complex that controls growth in response to nutrients by regulating translation, transcription, ribosome biogenesis, nutrient transport and autophagy; involved in meiosis phosphatidylinositol kinase homolog Null mutant is viable, grows slowly; rapamycin resistance, tor1 tor2 double mutant is inviable                                                                                       |
| YHR186C | [KOG1] Subunit of TORC1, a rapamycin-sensitive complex involved in growth control that contains Tor1p or Tor2p, Lst8p and Tco89p; contains four HEAT repeats and seven WD-40 repeats; may act as a scaffold protein to couple TOR and its effectors                                                                                                                                                                                                                             |
| YPL180W | [TCO89] Subunit of TORC1 (Tor1p or Tor2p-Kog1p-Lst8p-Tco89p), a complex that regulates growth in response to nutrient availability; cooperates with Ssd1p in the maintenance of cellular integrity; deletion strains are hypersensitive to rapamycin Null: Caffeine Sensitivity.                                                                                                                                                                                                |
| 0296    | GO_TERM:[TORC 2 complex] P-Value:1.4e-25                                                                                                                                                                                                                                                                                                                                                                                                                                        |
| YIL105C | [SLM1] Phosphoinositide P14,5P(2) binding protein, forms a complex with Slm2p; acts downstream of Mss4p in a pathway regulating actin cytoskeleton organization in response to stress; subunit of and phosphorylated by the TORC2 complex                                                                                                                                                                                                                                       |
| YNL047C | [SLM2] Phosphoinositide P14,5P(2) binding protein, forms a complex with Slm1p; acts downstream of Mss4p in a pathway regulating actin cytoskeleton organization in response to stress; subunit of and phosphorylated by the TORC2 complex                                                                                                                                                                                                                                       |
| YJL058C | [BIT61] Subunit of TORC2 (Tor2p-Lst8p-Avo1-Avo2-Tsc11p-Bit61p-Slm1p-Slm2p), a membrane-associated complex that regulates cell cycle-dependent actin cytoskeletal dynamics during polarized growth and cell wall integrity                                                                                                                                                                                                                                                       |
| YOL078W | [AVO1] Component of a membrane-bound complex containing the Tor2p kinase and other proteins, which may have a role in regulation of cell growth                                                                                                                                                                                                                                                                                                                                 |
| YNL006W | [LST8] Protein required for the transport of amino acid permease Gap1p from the Golgi to the cell surface; component of the TOR signaling pathway; associates with both Tor1p and Tor2p; contains a WD-repeat Reduced activity of a broad set of amino acid permeases                                                                                                                                                                                                           |
| YKL203C | [TOR2] PIK-related protein kinase and rapamycin target; subunit of TORC1, a complex that regulates growth in response to nutrients and TORC2, a complex that regulates cell-cycle dependent polarization of the actin cytoskeleton; involved in meiosis Null mutant is inviable, exhibits disruption of the polarized distribution of the actin cytoskeleton during the cell cycle; tor2-1 allele confers rapamycin resistance                                                  |

|           |                                                                                                                                                                                                                                                                                                                                                                                                                                                                                                                                                                    |
|-----------|--------------------------------------------------------------------------------------------------------------------------------------------------------------------------------------------------------------------------------------------------------------------------------------------------------------------------------------------------------------------------------------------------------------------------------------------------------------------------------------------------------------------------------------------------------------------|
| YER093C   | [TSC11] Subunit of TORC2 (Tor2p-Lst8p-Avo1-Avo2-Tsc11p-Bit61p), a membrane-associated complex that regulates actin cytoskeletal dynamics during polarized growth and cell wall integrity; involved in sphingolipid metabolism; contains a RasGEFN domain                                                                                                                                                                                                                                                                                                           |
| YMR068W   | [AVO2] Component of a complex containing the Tor2p kinase and other proteins, which may have a role in regulation of cell growth                                                                                                                                                                                                                                                                                                                                                                                                                                   |
| 0297      | GO_TERM:[biological_process] P-Value:9.6e-02                                                                                                                                                                                                                                                                                                                                                                                                                                                                                                                       |
| YHR199C   | [YHR199C] The authentic, non-tagged protein was localized to the mitochondria                                                                                                                                                                                                                                                                                                                                                                                                                                                                                      |
| YNL095C   |                                                                                                                                                                                                                                                                                                                                                                                                                                                                                                                                                                    |
| 0298      |                                                                                                                                                                                                                                                                                                                                                                                                                                                                                                                                                                    |
| YER053C   | [PIC2] Mitochondrial phosphate carrier, imports inorganic phosphate into mitochondria; functionally redundant with Mir1p but less abundant than Mir1p under normal conditions; expression is induced at high temperature                                                                                                                                                                                                                                                                                                                                           |
| YLR326W   |                                                                                                                                                                                                                                                                                                                                                                                                                                                                                                                                                                    |
| 0299      | GO_TERM:[phospholipid translocation] P-Value:2.6e-14                                                                                                                                                                                                                                                                                                                                                                                                                                                                                                               |
| YER166W   | [DNF1] Non-essential P-type ATPase that is a potential aminophospholipid translocase, localizes to the plasma membrane and late exocytic or early endocytic membranes, likely involved in protein transport Potential aminophospholipid translocase viable. drs2 dnf1 mutant grows slowly, massively accumulates intracellular membranes, and exhibits a substantial defect in the transport of alkaline phosphatase to the vacuole.                                                                                                                               |
| YDR093W   | [DNF2] Non-essential P-type ATPase that is a potential aminophospholipid translocase, localizes to the plasma membrane and late exocytic or early endocytic membranes, likely involved in protein transport; potential Cdc28p substrate Potential aminophospholipid translocase                                                                                                                                                                                                                                                                                    |
| YNL323W   | [LEM3] Membrane protein of the plasma membrane and ER, involved in translocation of phospholipids and alkylphosphocholine drugs across the plasma membrane membrane glycoprotein Null mutant sensitive to brefeldin A, shows increased glucocorticoid receptor activity in response to dexamethasone. Disruption showed marked decrease in internalization of phosphatidylethanolamine and phosphatidylcholine.                                                                                                                                                    |
| YAL026C   | [DRS2] Integral membrane Ca(2+)-ATPase involved in aminophospholipid translocation; required to form a specific class of secretory vesicles that accumulate upon actin cytoskeleton disruption; mutation affects maturation of the 18S rRNA P-type ATPase, potential aminophospholipid translocase Null mutant is viable, cold sensitive with perturbed late Golgi function; drs2 arf1 double mutants are inviable. drs2 dnf1 mutants grow slowly, accumulate intracellular membranes, exhibit substantial defect in transport of alkaline phosphatase to vacuole. |
| YCR094W   | [CDC50] Endosomal protein that regulates cell polarity; similar to Ynr048wp and Lem3p Null mutant is cold-sensitive and sensitive to MMS and HU                                                                                                                                                                                                                                                                                                                                                                                                                    |
| YJL204C   | [RCY1] F-box protein involved in recycling plasma membrane proteins internalized by endocytosis; localized to sites of polarized growth Deletion leads to an early block in the endocytic pathway before the intersection with the vacuolar protein sorting pathway                                                                                                                                                                                                                                                                                                |
| 0300      | GO_TERM:[molecular_function] P-Value:9.8e-02                                                                                                                                                                                                                                                                                                                                                                                                                                                                                                                       |
| YBR141C   |                                                                                                                                                                                                                                                                                                                                                                                                                                                                                                                                                                    |
| YGL091C   | [NBP35] Essential nuclear protein, evolutionarily conserved putative ATPase; exhibits genetic interaction with CDC2 encoding the catalytic subunit of DNA polymerase delta 35 kDa nucleotide binding protein                                                                                                                                                                                                                                                                                                                                                       |
| YLR352W   |                                                                                                                                                                                                                                                                                                                                                                                                                                                                                                                                                                    |
| YDR372C   | [VPS74] Non-essential protein of unknown function involved in vacuolar protein sorting; belongs to a family of cytosolic Golgi-associated proteins suggesting that it may play a role in secretion; also detected in the nucleus Null mutant secretes CPY.                                                                                                                                                                                                                                                                                                         |
| YLR149C   |                                                                                                                                                                                                                                                                                                                                                                                                                                                                                                                                                                    |
| 0301      | GO_TERM:[molecular_function] P-Value:4.8e-03                                                                                                                                                                                                                                                                                                                                                                                                                                                                                                                       |
| YKL072W   | [STB6] Protein that binds Sin3p in a two-hybrid assay                                                                                                                                                                                                                                                                                                                                                                                                                                                                                                              |
| YJL082W   | [IML2] Protein of unknown function, green fluorescent protein (GFP)-fusion protein localizes to the cytoplasm and nucleus                                                                                                                                                                                                                                                                                                                                                                                                                                          |
| YLR014C   | [PPR1] Zinc finger transcription factor containing a Zn(2)-Cys(6) binuclear cluster domain, positively regulates transcription of genes involved in uracil biosynthesis; activity may be modulated by interaction with Tup1p zinc finger transcription factor of the Zn(2)-Cys(6) binuclear cluster domain type Null mutant is viable, deficient in pyrimidine biosynthetic pathway                                                                                                                                                                                |
| YER088C   | [DOT6] Protein of unknown function, involved in telomeric gene silencing and filamentation                                                                                                                                                                                                                                                                                                                                                                                                                                                                         |
| YPL229W   |                                                                                                                                                                                                                                                                                                                                                                                                                                                                                                                                                                    |
| YOL159C-A |                                                                                                                                                                                                                                                                                                                                                                                                                                                                                                                                                                    |
| YNL091W   | [NST1] Protein of unknown function, mediates sensitivity to salt stress; interacts physically with the splicing factor Msl1p and also displays genetic interaction with MSL1                                                                                                                                                                                                                                                                                                                                                                                       |
| YKL075C   |                                                                                                                                                                                                                                                                                                                                                                                                                                                                                                                                                                    |

|                |                                                                                                                                                                                                                                                                                                                                                                                                                                                                                                                                                                                                                                                                                                                                                                                   |
|----------------|-----------------------------------------------------------------------------------------------------------------------------------------------------------------------------------------------------------------------------------------------------------------------------------------------------------------------------------------------------------------------------------------------------------------------------------------------------------------------------------------------------------------------------------------------------------------------------------------------------------------------------------------------------------------------------------------------------------------------------------------------------------------------------------|
| YNL164C        | [IBD2] Component of the BUB2-dependent spindle checkpoint pathway, interacts with Bfa1p and functions upstream of Bub2p and Bfa1p<br>Null: viable, sensitive to benomyl                                                                                                                                                                                                                                                                                                                                                                                                                                                                                                                                                                                                           |
| 0302           | GO_TERM:[RNA-directed DNA polymerase activity] P-Value:7.7e-04                                                                                                                                                                                                                                                                                                                                                                                                                                                                                                                                                                                                                                                                                                                    |
| YNL054W-B      |                                                                                                                                                                                                                                                                                                                                                                                                                                                                                                                                                                                                                                                                                                                                                                                   |
| YPL257W-B      |                                                                                                                                                                                                                                                                                                                                                                                                                                                                                                                                                                                                                                                                                                                                                                                   |
| 0303           | GO_TERM:[porphyrin biosynthesis] P-Value:3.0e-03                                                                                                                                                                                                                                                                                                                                                                                                                                                                                                                                                                                                                                                                                                                                  |
| YDR458C        |                                                                                                                                                                                                                                                                                                                                                                                                                                                                                                                                                                                                                                                                                                                                                                                   |
| YHR202W        |                                                                                                                                                                                                                                                                                                                                                                                                                                                                                                                                                                                                                                                                                                                                                                                   |
| YMR136W        | [GAT2] Protein containing GATA family zinc finger motifs; similar to Gln3p and Dal80p; expression repressed by leucine                                                                                                                                                                                                                                                                                                                                                                                                                                                                                                                                                                                                                                                            |
| YLR154W-C      | [TAR1] Mitochondrial protein of unknown function, overexpression suppresses an rpo41 mutation affecting mitochondrial RNA polymerase; encoded within the 25S rRNA gene on the opposite strand                                                                                                                                                                                                                                                                                                                                                                                                                                                                                                                                                                                     |
| YGR230W        | [BNS1] Protein with some similarity to Spo12p; overexpression bypasses need for Spo12p, but not required for meiosis Null mutant is viable and exhibits no obvious meiotic defects. When overexpressed, BNS1 can partially suppress the meiotic defect of spo12/spo12 deletion mutants.                                                                                                                                                                                                                                                                                                                                                                                                                                                                                           |
| YKR061W        | [KTR2] Mannosyltransferase involved in N-linked protein glycosylation; member of the KRE2/MNT1 mannosyltransferase family mannosyltransferase (putative) type 2 membrane protein Null mutant is viable, with partial resistance to killer toxin                                                                                                                                                                                                                                                                                                                                                                                                                                                                                                                                   |
| YER014W        | [HEM14] Protoporphyrinogen oxidase, a mitochondrial enzyme that catalyzes the seventh step in the heme biosynthetic pathway, converting protoporphyrinogen IX to protoporphyrin IX protoporphyrinogen oxidase Null mutant is viable but is protoporphyrinogen oxidase deficient (heme deficiency and accumulation of heme precursors)                                                                                                                                                                                                                                                                                                                                                                                                                                             |
| YER141W        | [COX15] Protein required for the hydroxylation of heme O to form heme A, which is an essential prosthetic group for cytochrome c oxidase cytochrome oxidase assembly factor fail to synthesize cytochrome oxidase                                                                                                                                                                                                                                                                                                                                                                                                                                                                                                                                                                 |
| YGL101W        |                                                                                                                                                                                                                                                                                                                                                                                                                                                                                                                                                                                                                                                                                                                                                                                   |
| YJL092W        | [HPR5] DNA helicase and DNA-dependent ATPase involved in DNA repair, required for proper timing of commitment to meiotic recombination and the transition from Meiosis I to Meiosis II; potential Cdc28p substrate DNA helicase Null mutant is viable, radiation (ultraviolet or ionizing sensitive), loss of function results in RAD52-dependent hyperrecombination suggesting recombination suppression occurs by antagonizing the Rad52 recombinational repair pathway; wild-type suppresses mitotic recombination; some mutant alleles have lower spore viability which is not rescued by spo13, suggesting they affect a late recombination function; hpr5 mutations are rad6 suppressors. Growth defects of mgs1 rad18 double mutants are suppressed by a mutation in HPR5. |
| 0304           | GO_TERM:[tRNA metabolism] P-Value:1.6e-02 OVERLAP:[tRNA splicing] <440.30.30> SIZE:11                                                                                                                                                                                                                                                                                                                                                                                                                                                                                                                                                                                                                                                                                             |
| YIR035C        |                                                                                                                                                                                                                                                                                                                                                                                                                                                                                                                                                                                                                                                                                                                                                                                   |
| YLR401C        | [DUS3] Dihydrouridine synthase, member of a widespread family of conserved proteins including Smm1p, Dus1p, and Dus4p; contains a consensus oleate response element (ORE) in its promoter region dihydrouridine synthase 3                                                                                                                                                                                                                                                                                                                                                                                                                                                                                                                                                        |
| YBR248C        | [HIS7] Imidazole glycerol phosphate synthase (glutamine amidotransferase:cyclase), catalyzes the fifth and sixth steps of histidine biosynthesis and also produces 5-aminoimidazole-4-carboxamide ribotide (AICAR), a purine precursor imidazole glycerol phosphate synthase Null mutant is viable and requires histidine                                                                                                                                                                                                                                                                                                                                                                                                                                                         |
| <b>YOL102C</b> | [TPT1] tRNA 2'-phosphotransferase, catalyzes the final step in yeast tRNA splicing: the transfer of the 2'-PO(4) from the splice junction to NAD(+) to form ADP-ribose 1"-2" cyclic phosphate and nicotinamide tRNA 2'-phosphotransferase                                                                                                                                                                                                                                                                                                                                                                                                                                                                                                                                         |
| 0305           | GO_TERM:[biological_process] P-Value:9.6e-02                                                                                                                                                                                                                                                                                                                                                                                                                                                                                                                                                                                                                                                                                                                                      |
| YDR152W        | [GIR2] Highly-acidic cytoplasmic RWD domain-containing protein of unknown function, sensitive to proteolysis, N-terminal region has high content of acidic amino acid residues, putative IUP (intrinsically unstructured protein)                                                                                                                                                                                                                                                                                                                                                                                                                                                                                                                                                 |
| YGR173W        | [RBG2] Protein with similarity to mammalian developmentally regulated GTP-binding protein                                                                                                                                                                                                                                                                                                                                                                                                                                                                                                                                                                                                                                                                                         |
| 0306           | GO_TERM:[ribose phosphate diphosphokinase activity] P-Value:2.5e-11                                                                                                                                                                                                                                                                                                                                                                                                                                                                                                                                                                                                                                                                                                               |
| YJR099W        | [YUH1] Ubiquitin C-terminal hydrolase that cleaves ubiquitin-protein fusions to generate monomeric ubiquitin; hydrolyzes the peptide bond at the C-terminus of ubiquitin; also the major processing enzyme for the ubiquitin-like protein Rub1p ubiquitin hydrolase                                                                                                                                                                                                                                                                                                                                                                                                                                                                                                               |
| YER099C        | [PRS2] 5-phospho-ribosyl-1(alpha)-pyrophosphate synthetase, involved in nucleotide, histidine, and tryptophan biosynthesis; one of a five related enzymes, which are active as heteromultimeric complexes ribose-phosphate pyrophosphokinase                                                                                                                                                                                                                                                                                                                                                                                                                                                                                                                                      |
| YKL181W        | [PRS1] 5-phospho-ribosyl-1(alpha)-pyrophosphate synthetase, involved in nucleotide, histidine, and tryptophan biosynthesis; one of five related enzymes, which are active as heteromultimeric complexes ribose-phosphate pyrophosphokinase                                                                                                                                                                                                                                                                                                                                                                                                                                                                                                                                        |
| YBL068W        | [PRS4] 5-phospho-ribosyl-1(alpha)-pyrophosphate synthetase, involved in nucleotide, histidine, and tryptophan biosynthesis; one of a five related enzymes, which are active as heteromultimeric complexes ribose-phosphate pyrophosphokinase                                                                                                                                                                                                                                                                                                                                                                                                                                                                                                                                      |
| YNL036W        | [NCE103] Carbonic anhydrase; poorly transcribed under aerobic conditions and at an undetectable level under anaerobic conditions; involved in non-classical protein export pathway carbonic anhydrase-like protein                                                                                                                                                                                                                                                                                                                                                                                                                                                                                                                                                                |
| YER163C        |                                                                                                                                                                                                                                                                                                                                                                                                                                                                                                                                                                                                                                                                                                                                                                                   |
| YOL061W        | [PRS5] 5-phospho-ribosyl-1(alpha)-pyrophosphate synthetase, involved in nucleotide, histidine, and tryptophan biosynthesis; one of a five related enzymes, which are active as heteromultimeric complexes phosphoribosylpyrophosphate synthetase (ribose-phosphate pyrophosphokinase) Null mutant is viable but reduces the cellular 5-phosphoribosyl-1(alpha)-pyrophosphate synthetase activity by 84%. prs5 mutations are synthetically lethal with mutations in prs1 or prs3.                                                                                                                                                                                                                                                                                                  |

|                |                                                                                                                                                                                                                                                                                                                                                                                                                                                                                                             |
|----------------|-------------------------------------------------------------------------------------------------------------------------------------------------------------------------------------------------------------------------------------------------------------------------------------------------------------------------------------------------------------------------------------------------------------------------------------------------------------------------------------------------------------|
| YPL196W        | [OXR1] Protein of unknown function required for normal levels of resistance to oxidative damage, null mutants are sensitive to hydrogen peroxide; member of a conserved family of proteins found in eukaryotes but not in prokaryotes                                                                                                                                                                                                                                                                       |
| 0307           | GO_TERM:[hydrolase activity, acting on ester bonds] P-Value:8.2e-02                                                                                                                                                                                                                                                                                                                                                                                                                                         |
| YDL001W        | [RMD1] Cytoplasmic protein required for sporulation                                                                                                                                                                                                                                                                                                                                                                                                                                                         |
| YDL133W        |                                                                                                                                                                                                                                                                                                                                                                                                                                                                                                             |
| YMR137C        | [PSO2] Required for a post-incision step in the repair of DNA single and double-strand breaks that result from interstrand crosslinks produced by a variety of mono- and bi-functional psoralen derivatives; induced by UV-irradiation interstrand crosslink repair protein sensitive to photoaddition of psoralens, nitrogen mustard                                                                                                                                                                       |
| YHR076W        | [PTC7] Mitochondrially localized type 2C protein phosphatase; expression induced by growth on ethanol and by sustained osmotic stress; possible role in carbon source utilization in low oxygen environments type 2C Protein Phosphatase                                                                                                                                                                                                                                                                    |
| YKL091C        |                                                                                                                                                                                                                                                                                                                                                                                                                                                                                                             |
| YMR079W        | [SEC14] Phosphatidylinositol/phosphatidylcholine transfer protein involved in coordinate regulation of PtdIns and PtdCho metabolism, products of which are regulators in Golgi to plasma membrane transport; functionally homologous to mammalian PITPs phosphatidylcholine transfer protein/phosphatidylinositol transfer protein Null mutant is inviable; other mutations are temperature sensitive                                                                                                       |
| 0308           | GO_TERM:[cell cycle arrest in response to pheromone] P-Value:4.3e-16 OVERLAP:[cytoplasmic ribosomal large subunit] <500.40.10> SIZE:81                                                                                                                                                                                                                                                                                                                                                                      |
| YER075C        | [PTP3] Phosphotyrosine-specific protein phosphatase involved in the inactivation of mitogen-activated protein kinase (MAPK) during osmolarity sensing; dephosphorylates Hog1p MAPK and regulates its localization; localized to the cytoplasm tyrosine phosphatase Null mutant is viable; disruption of PTP3 in combination with its homolog PTP2 results in constitutive tyrosine phosphorylation,enhanced kinase activity of Fus3p MAP kinase on stimulation, and delayed recovery from cell cycle arrest |
| YMR319C        | [FET4] Low-affinity Fe(II) transporter of the plasma membrane low affinity Fe <sup>2+</sup> transport protein Mutant lacks low affinity Fe(II) transport but has more active high affinity Fe(II) transport activity                                                                                                                                                                                                                                                                                        |
| YNL127W        | [FAR11] Protein involved in G1 cell cycle arrest in response to pheromone, in a pathway different from the Far1p-dependent pathway; interacts with Far3p, Far7p, Far8p, Far9p, and Far10p Null: Defective for pheromone-induced G1 arrest                                                                                                                                                                                                                                                                   |
| <b>YHL001W</b> | [RPL14B] Protein component of the large (60S) ribosomal subunit, nearly identical to Rpl14Ap and has similarity to rat L14 ribosomal protein ribosomal protein L14B                                                                                                                                                                                                                                                                                                                                         |
| YLR238W        | [FAR10] Protein involved in G1 cell cycle arrest in response to pheromone, in a pathway different from the Far1p-dependent pathway; interacts with Far3p, Far7p, Far8p, Far9p, and Far11p; potential Cdc28p substrate Null: Defective for pheromone-induced G1 arrest                                                                                                                                                                                                                                       |
| YFR008W        | [FAR7] Protein involved in G1 cell cycle arrest in response to pheromone, in a pathway different from the Far1p-dependent pathway; interacts with Far3p, Far8p, Far9p, Far10p, and Far11p Null: Defective for pheromone-induced G1 arrest                                                                                                                                                                                                                                                                   |
| YDR200C        | [VPS64] Cytoplasmic protein required for cytoplasm to vacuole targeting of proteins; forms a complex with Far3p, Far7p, Far10p, and Far11p that is involved in pheromone-induced cell cycle arrest; also localized to the endoplasmic reticulum membrane Null mutant secretes CPY.                                                                                                                                                                                                                          |
| YMR029C        | [FAR8] Protein involved in G1 cell cycle arrest in response to pheromone, in a pathway different from the Far1p-dependent pathway; interacts with Far3p, Far7p, Far9p, Far10p, and Far11p Null: Defective for pheromone-induced G1 arrest                                                                                                                                                                                                                                                                   |
| YMR052W        | [FAR3] Protein involved in G1 cell cycle arrest in response to pheromone, in a pathway different from the Far1p-dependent pathway; interacts with Far7p, Far8p, Far9p, Far10p, and Far11p Null mutant does not arrest in G1 in response to pheromone but does have an intact signal transduction pathway leading to FAR1 transcriptional induction                                                                                                                                                          |
| 0309           | GO_TERM:[DNA binding] P-Value:2.2e-02                                                                                                                                                                                                                                                                                                                                                                                                                                                                       |
| YGL131C        | [SNT2] DNA binding protein with similarity to the S. pombe Snt2 protein                                                                                                                                                                                                                                                                                                                                                                                                                                     |
| YIL101C        | [XBP1] Transcriptional repressor that binds to promoter sequences of the cyclin genes, CYS3, and SMF2; expression is induced by stress or starvation during mitosis, and late in meiosis; member of the Swi4p/Mbp1p family; potential Cdc28p substrate transcriptional repressor                                                                                                                                                                                                                            |
| YDR042C        |                                                                                                                                                                                                                                                                                                                                                                                                                                                                                                             |
| YLR413W        |                                                                                                                                                                                                                                                                                                                                                                                                                                                                                                             |
| 0310           | GO_TERM:[transposition, RNA-mediated] P-Value:8.6e-04                                                                                                                                                                                                                                                                                                                                                                                                                                                       |
| YBR012W-B      |                                                                                                                                                                                                                                                                                                                                                                                                                                                                                                             |
| YLR157C-A      |                                                                                                                                                                                                                                                                                                                                                                                                                                                                                                             |
| 0311           | GO_TERM:[hydrolase activity, acting on ester bonds] P-Value:4.2e-02                                                                                                                                                                                                                                                                                                                                                                                                                                         |
| YBR276C        | [PPS1] Protein phosphatase with specificity for serine, threonine, and tyrosine residues; has a role in the DNA synthesis phase of the cell cycle dual specificity protein phosphatase Null mutant is viable; overexpression causes cell cycle arrest                                                                                                                                                                                                                                                       |
| YLR359W        | [ADE13] Adenylosuccinate lyase, catalyzes two steps in the 'de novo' purine nucleotide biosynthetic pathway adenylosuccinate lyase Unable to grow on complete media with glucose or fructose as a carbon source, but can grow with glycerol or ethanol                                                                                                                                                                                                                                                      |
| YOL152W        | [FRE7] Putative ferric reductase with similarity to Fre2p; expression induced by low copper levels                                                                                                                                                                                                                                                                                                                                                                                                          |

|                |                                                                                                                                                                                                                                                                                                                                                                                                                                                                                                                                                                               |
|----------------|-------------------------------------------------------------------------------------------------------------------------------------------------------------------------------------------------------------------------------------------------------------------------------------------------------------------------------------------------------------------------------------------------------------------------------------------------------------------------------------------------------------------------------------------------------------------------------|
| Q0110          | [BI2] Mitochondrial mRNA maturase with a role in splicing, encoded by both exon and intron sequences of partially processed COB mRNA mRNA maturase bl2                                                                                                                                                                                                                                                                                                                                                                                                                        |
| YGR037C        | [ACB1] Acyl-CoA-binding protein, transports newly synthesized acyl-CoA esters from fatty acid synthetase (Fas1p-Fas2p) to acyl-CoA-consuming processes acyl-CoA-binding protein (ACBP)/diazepam binding inhibitor (DBI)/endozepine (EP) Null mutant is viable, slightly reduced growth rate on ethanol                                                                                                                                                                                                                                                                        |
| 0312           | GO_TERM:[catalytic activity] P-Value:2.0e-02                                                                                                                                                                                                                                                                                                                                                                                                                                                                                                                                  |
| YPL028W        | [ERG10] Acetyl-CoA C-acetyltransferase (acetoacetyl-CoA thiolase), cytosolic enzyme that transfers an acetyl group from one acetyl-CoA molecule to another, forming acetoacetyl-CoA; involved in the first step in mevalonate biosynthesis acetoacetyl CoA thiolase Nul mutant is inviable; other mutants are ergosterol biosynthesis defective or nystatin resistant                                                                                                                                                                                                         |
| YGL009C        | [LEU1] Isopropylmalate isomerase, catalyzes the second step in the leucine biosynthesis pathway isopropylmalate isomerase Leucine requiring                                                                                                                                                                                                                                                                                                                                                                                                                                   |
| YGR171C        | [MSM1] Mitochondrial methionyl-tRNA synthetase (MetRS), functions as a monomer in mitochondrial protein synthesis; functions similarly to cytoplasmic MetRS although the cytoplasmic form contains a zinc-binding domain not found in Msm1p methionine-tRNA ligase                                                                                                                                                                                                                                                                                                            |
| 0313           |                                                                                                                                                                                                                                                                                                                                                                                                                                                                                                                                                                               |
| YCR102C        |                                                                                                                                                                                                                                                                                                                                                                                                                                                                                                                                                                               |
| YNL134C        |                                                                                                                                                                                                                                                                                                                                                                                                                                                                                                                                                                               |
| 0314           | GO_TERM:[molecular_function] P-Value:4.7e-02 OVERLAP:[eEF1] <500.20.10> SIZE:6                                                                                                                                                                                                                                                                                                                                                                                                                                                                                                |
| YKR010C        | [TOF2] Nonessential mitochondrial protein of unknown function with sequence similarity to Net1p; identified as a topoisomerase I (Top1p) binding protein; displays synthetic genetic interactions with TOP1 and HPR1 Null mutant is viable and has no obvious phenotypes; tof2-hpr1 double mutant shows poor growth                                                                                                                                                                                                                                                           |
| YBL033C        | [RIB1] GTP cyclohydrolase II; catalyzes the first step of the riboflavin biosynthesis pathway GTP cyclohydrolase II                                                                                                                                                                                                                                                                                                                                                                                                                                                           |
| YPR172W        |                                                                                                                                                                                                                                                                                                                                                                                                                                                                                                                                                                               |
| YLR456W        |                                                                                                                                                                                                                                                                                                                                                                                                                                                                                                                                                                               |
| <b>YKR084C</b> | [HBS1] GTP binding protein with sequence similarity to the elongation factor class of G proteins, EF-1alpha and Sup35p; associates with Dom34p, and shares a similar genetic relationship with genes that encode ribosomal protein components                                                                                                                                                                                                                                                                                                                                 |
| YNL001W        | [DOM34] Probable RNA-binding protein, functions in protein translation to promote G1 progression and differentiation, required for meiotic cell division                                                                                                                                                                                                                                                                                                                                                                                                                      |
| 0315           | GO_TERM:[protein binding] P-Value:3.0e-02                                                                                                                                                                                                                                                                                                                                                                                                                                                                                                                                     |
| YBR072W        | [HSP26] Small heat shock protein with chaperone activity that is regulated by a heat induced transition from an inactive oligomeric (24-mer) complex to an active dimer; induced by heat, upon entry into stationary phase, and during sporulation heat shock protein 26 Null mutant is viable; hsp26 hsp42 double deletion mutants are viable                                                                                                                                                                                                                                |
| YDR213W        | [UPC2] Sterol regulatory element binding protein, induces transcription of sterol transport and biosynthetic genes; involved in the anaerobic induction of DAN/TIR mannoproteins and seripauperins; binucleate zinc cluster protein; Ecm22p homolog zinc finger transcription factor of the Zn(2)-Cys(6) binuclear cluster domain type Null mutant is viable; upc2-1 allele shows altered sterol uptake                                                                                                                                                                       |
| YML111W        | [BUL2] Component of the Rsp5p E3-ubiquitin ligase complex, involved in intracellular amino acid permease sorting, functions in heat shock element mediated gene expression, essential for growth in stress conditions, functional homolog of BUL1                                                                                                                                                                                                                                                                                                                             |
| 0316           | GO_TERM:[binding] P-Value:2.8e-02 OVERLAP:[Signal recognition particle receptor (SRP)] <520.50> SIZE:2                                                                                                                                                                                                                                                                                                                                                                                                                                                                        |
| <b>YDR292C</b> | [SRP101] Signal recognition particle (SRP) receptor - alpha subunit; contain GTPase domains; involved in SRP-dependent protein targeting; interacts with SRP102p Null mutant is viable, cells show sixfold reduction in growth rate. Depletion of SRP101 causes impaired translocation of soluble and membrane proteins across the ER membrane                                                                                                                                                                                                                                |
| YMR163C        |                                                                                                                                                                                                                                                                                                                                                                                                                                                                                                                                                                               |
| 0317           |                                                                                                                                                                                                                                                                                                                                                                                                                                                                                                                                                                               |
| YHL026C        |                                                                                                                                                                                                                                                                                                                                                                                                                                                                                                                                                                               |
| YOL064C        | [MET22] Bisphosphate-3'-nucleotidase, involved in salt tolerance and methionine biogenesis; dephosphorylates 3'-phosphoadenosine-5'-phosphate and 3'-phosphoadenosine-5'-phosphosulfate, intermediates of the sulfate assimilation pathway 3'(2)5'-bisphosphate nucleotidase Methionine requiring; lacks 3'-phosphoadenylylsulfate (PAPS) reductase activity; unable to grow on sulfate as sole sulfur source; overexpression confers lithium resistance; pAp accumulation in met22 mutants (or under MET22 inhibition) inhibits the 5'->3' exoribonucleases Xrn1p and Rat1p. |
| 0318           | GO_TERM:[meiotic DNA recombinase assembly] P-Value:3.2e-04 OVERLAP:[Kornberg's mediator (SRB) complex] <510.40.20> SIZE:21                                                                                                                                                                                                                                                                                                                                                                                                                                                    |
| YHR079C-A      | [SAE3] Meiosis specific protein involved in DMC1-dependent meiotic recombination, forms heterodimer with Mei5p; proposed to be an assembly factor for Dmc1p                                                                                                                                                                                                                                                                                                                                                                                                                   |
| YPL121C        | [MEI5] Meiosis specific protein involved in DMC1-dependent meiotic recombination, forms heterodimer with Sae3p; proposed to be an assembly factor for Dmc1p                                                                                                                                                                                                                                                                                                                                                                                                                   |

|                |                                                                                                                                                                                                                                                                                                                                                                                                                                                                                                                                                                                                                                                                                                                                                                                  |
|----------------|----------------------------------------------------------------------------------------------------------------------------------------------------------------------------------------------------------------------------------------------------------------------------------------------------------------------------------------------------------------------------------------------------------------------------------------------------------------------------------------------------------------------------------------------------------------------------------------------------------------------------------------------------------------------------------------------------------------------------------------------------------------------------------|
|                | assembly factor for Dmc1p                                                                                                                                                                                                                                                                                                                                                                                                                                                                                                                                                                                                                                                                                                                                                        |
| YNL208W        |                                                                                                                                                                                                                                                                                                                                                                                                                                                                                                                                                                                                                                                                                                                                                                                  |
| <b>YER179W</b> | [DMC1] Meiosis-specific protein required for repair of double-strand breaks and pairing between homologous chromosomes; homolog of Rad51p and the bacterial RecA protein meiosis-specific protein related to RecA and Rad51p. Dmc1p colocalizes with Rad51p to discrete subnuclear sites in nuclear spreads during mid prophase, briefly colocalizes with Zip1p, and then disappears by pachytene                                                                                                                                                                                                                                                                                                                                                                                |
| YPR183W        | [DPM1] Dolichol phosphate mannose (Dol-P-Man) synthase of the ER membrane, catalyzes the formation of Dol-P-Man from Dol-P and GDP-Man; required for glycosyl phosphatidylinositol membrane anchoring, O mannosylation, and protein glycosylation dolichol phosphate mannose synthase                                                                                                                                                                                                                                                                                                                                                                                                                                                                                            |
| YHR136C        | [SPL2] Protein with similarity to cyclin-dependent kinase inhibitors, overproduction suppresses a plc1 null mutation; green fluorescent protein (GFP)-fusion protein localizes to the cytoplasm in a punctate pattern Null mutant is viable and shows no obvious phenotype; spl2-delta plc1-delta double mutant fails to grow on SCD complete media, but grows on YPD at 25 degrees C                                                                                                                                                                                                                                                                                                                                                                                            |
| YOR285W        |                                                                                                                                                                                                                                                                                                                                                                                                                                                                                                                                                                                                                                                                                                                                                                                  |
| 0319           | GO_TERM:[biological_process] P-Value:9.6e-02                                                                                                                                                                                                                                                                                                                                                                                                                                                                                                                                                                                                                                                                                                                                     |
| YGL110C        | [CUE3] Protein of unknown function; has a CUE domain that binds ubiquitin, which may facilitate intramolecular monoubiquitination                                                                                                                                                                                                                                                                                                                                                                                                                                                                                                                                                                                                                                                |
| YKR023W        |                                                                                                                                                                                                                                                                                                                                                                                                                                                                                                                                                                                                                                                                                                                                                                                  |
| 0320           | GO_TERM:[nucleus] P-Value:6.9e-01                                                                                                                                                                                                                                                                                                                                                                                                                                                                                                                                                                                                                                                                                                                                                |
| YBR223C        | [TDP1] Tyrosyl-DNA Phosphodiesterase I, hydrolyzes 3'-phosphotyrosyl bonds to generate 3'-phosphate DNA and tyrosine, involved in the repair of DNA lesions created by topoisomerase I                                                                                                                                                                                                                                                                                                                                                                                                                                                                                                                                                                                           |
| YGL082W        |                                                                                                                                                                                                                                                                                                                                                                                                                                                                                                                                                                                                                                                                                                                                                                                  |
| 0321           | GO_TERM:[endoplasmic reticulum] P-Value:1.4e-01                                                                                                                                                                                                                                                                                                                                                                                                                                                                                                                                                                                                                                                                                                                                  |
| YJR025C        | [BNA1] 3-hydroxyanthranilic acid dioxygenase, required for biosynthesis of nicotinic acid from tryptophan via kynurenine pathway 3-hydroxyanthranilic acid dioxygenase Null mutant is viable, nicotinic acid auxotroph. Deletion results in significant rDNA silencing defect only on medium deficient in nicotinic acid, an NAD(+) precursor.                                                                                                                                                                                                                                                                                                                                                                                                                                   |
| YML108W        |                                                                                                                                                                                                                                                                                                                                                                                                                                                                                                                                                                                                                                                                                                                                                                                  |
| YBR162W-A      | [YSY6] Protein whose expression suppresses a secretory pathway mutation in E. coli; has similarity to the mammalian RAMP4 protein involved in secretion                                                                                                                                                                                                                                                                                                                                                                                                                                                                                                                                                                                                                          |
| YIL027C        | [KRE27] Protein of unknown function; null mutant shows K1 killer toxin resistance K1 killer toxin resistance                                                                                                                                                                                                                                                                                                                                                                                                                                                                                                                                                                                                                                                                     |
| 0322           | GO_TERM:[vacuolar acidification] P-Value:3.0e-04 OVERLAP:[ER assembly complex] <90.30> SIZE:2                                                                                                                                                                                                                                                                                                                                                                                                                                                                                                                                                                                                                                                                                    |
| <b>YHR060W</b> | [VMA22] Integral membrane protein that is required for vacuolar H <sup>+</sup> -ATPase (V-ATPase) function, although not an actual component of the V-ATPase complex; functions in the assembly of the V-ATPase; localized to the yeast endoplasmic reticulum (ER) Null mutant is viable but is defective in vacuolar H <sup>(+)</sup> -ATPase activity, sensitive to calcium, cyclosporin A, and FK506, and requires calcineurin for viability                                                                                                                                                                                                                                                                                                                                  |
| <b>YKL119C</b> | [VPH2] Integral membrane protein required for vacuolar H <sup>+</sup> -ATPase (V-ATPase) function, although not an actual component of the V-ATPase complex; functions in the assembly of the V-ATPase; localized to the endoplasmic reticulum (ER) 25.2 kDa protein involved in assembly of vacuolar H <sup>(+)</sup> ATPase Null mutant is viable, zinc sensitive, defective in vacuolar acidification, calcium-sensitive, respiratory deficient                                                                                                                                                                                                                                                                                                                               |
| 0323           | GO_TERM:[vacuolar acidification] P-Value:2.4e-30 OVERLAP:[H <sup>+</sup> -transporting ATPase, vacuolar] <220> SIZE:15                                                                                                                                                                                                                                                                                                                                                                                                                                                                                                                                                                                                                                                           |
| YDR202C        | [RAV2] Subunit of RAVE (Rav1p, Rav2p, Skp1p), a complex that associates with the V1 domain of the vacuolar membrane (H <sup>+</sup> )-ATPase (V-ATPase) and promotes assembly and reassembly of the holoenzyme                                                                                                                                                                                                                                                                                                                                                                                                                                                                                                                                                                   |
| YJR033C        | [RAV1] Subunit of the RAVE complex (Rav1p, Rav2p, Skp1p), which promotes assembly of the V-ATPase holoenzyme; required for transport between the early and late endosome/PVC and for localization of TGN membrane proteins; potential Cdc28p substrate                                                                                                                                                                                                                                                                                                                                                                                                                                                                                                                           |
| <b>YKL080W</b> | [VMA5] Subunit C of the eight-subunit V1 peripheral membrane domain of vacuolar H <sup>+</sup> -ATPase (V-ATPase), an electrogenic proton pump found throughout the endomembrane system; required for the V1 domain to assemble onto the vacuolar membrane V1 sector hydrophilic subunit C vacuolar ATPase V1 domain subunit C (42 kDa) vacuolar H-ATPase Null mutant is viable; certain vma5 mutations show allele-specific synthetic lethality with cdc24-ls mutants                                                                                                                                                                                                                                                                                                           |
| <b>YDL185W</b> | [TFP1] Vacuolar ATPase V1 domain subunit A containing the catalytic nucleotide binding sites; protein precursor undergoes self-catalyzed splicing to yield the extein Tfp1p and the intein Vde (PI-SceI), which is a site-specific endonuclease protein with three regions (ABC) that are spliced to yield the extein AC and the intein B; AC is a 69K vacuolar (H <sup>+</sup> )-ATPase, and B is a 50K site-specific endonuclease named VDE (PI-SceI) that is homologous to HO. Cleavage is meiosis-specific and induces gelsite-specific endonuclease VDE (PI-SceI) vacuolar ATPase V1 domain subunit A (69 kDa) Null mutant is viable, resistant to trifluoperazine, grows slowly under non-acidic conditions and on glycerol and is cold, temperature, and cation-sensitive |
| <b>YOR270C</b> | [VPH1] Subunit of vacuolar-ATPase V0 domain, one of two isoforms (Vph1p and Stv1p); Vph1p is located in V-ATPase complexes of the vacuole while Stv1p is located in V-ATPase complexes of the Golgi and endosomes V0 sector subunit essential for vacuolar acidification and vacuolar H-ATPase activity vacuolar ATPase V0 domain subunit a (100 kDa) vacuolar H-ATPase Null mutant is viable, deficient in assembly of vacuolar H <sup>(+)</sup> ATPase and acidification of the vacuole                                                                                                                                                                                                                                                                                        |

|                  |                                                                                                                                                                                                                                                                                                                                                                                                                                                                                                                               |
|------------------|-------------------------------------------------------------------------------------------------------------------------------------------------------------------------------------------------------------------------------------------------------------------------------------------------------------------------------------------------------------------------------------------------------------------------------------------------------------------------------------------------------------------------------|
| <b>YBR127C</b>   | [VMA2] Subunit B of the eight-subunit V1 peripheral membrane domain of the vacuolar H <sup>+</sup> -ATPase (V-ATPase), an electrogenic proton pump found throughout the endomembrane system; contains nucleotide binding sites; also detected in the cytoplasm vacuolar ATPase V1 domain subunit B (60 kDa) Null mutant is viable, severely defective for growth in medium buffered at neutral pH                                                                                                                             |
| <b>YHR039C-A</b> | [VMA10] Vacuolar H <sup>+</sup> ATPase subunit G of the catalytic (V1) sector, involved in vacuolar acidification vacuolar ATPase V1 domain subunit G (13 kDa) Null mutant is viable, fails to grow on media buffered at pH 7.5, fails to accumulate quinacrine in its vacuole                                                                                                                                                                                                                                                |
| <b>YEL051W</b>   | [VMA8] Subunit D of the eight-subunit V1 peripheral membrane domain of the vacuolar H <sup>+</sup> -ATPase (V-ATPase), an electrogenic proton pump found throughout the endomembrane system; plays a role in the coupling of proton transport and ATP hydrolysis V1 catalytic sector D subunit vacuolar H-ATPase Null mutant is viable, does not grow on media buffered at pH 7.5 and does not show accumulation of quinacrine into its vacuoles; grows slowly, fails to grow on non-fermentable carbon sources               |
| <b>YMR054W</b>   | [STV1] Subunit of vacuolar-ATPase V0 domain, one of two isoforms (Stv1p and Vph1p); Stv1p is located in V-ATPase complexes of the Golgi and endosomes while Vph1p is located in V-ATPase complexes of the vacuole 110 kDa subunit; not in vacuole membrane vacuolar H-ATPase Null mutant is viable, displays additive phenotypes in combination with vph1 null mutations                                                                                                                                                      |
| <b>YOR332W</b>   | [VMA4] Subunit E of the eight-subunit V1 peripheral membrane domain of the vacuolar H <sup>+</sup> -ATPase (V-ATPase), an electrogenic proton pump found throughout the endomembrane system; required for the V1 domain to assemble onto the vacuolar membrane E subunit of V1 sector vacuolar H(+) ATPase 27 kDa subunit Null mutant is viable, slow growing, cold-sensitive, thermo-sensitive, and exhibits poor growth on glycerol; fails to grow on media supplemented with 100 mM CaCl <sub>2</sub> or ZnCl <sub>2</sub> |
| <b>YGR020C</b>   | [VMA7] Subunit F of the eight-subunit V1 peripheral membrane domain of vacuolar H <sup>+</sup> -ATPase (V-ATPase), an electrogenic proton pump found throughout the endomembrane system; required for the V1 domain to assemble onto the vacuolar membrane vacuolar ATPase V1 domain subunit F (14 kDa) Null mutant is viable, unable to grow on media buffered at pH 7.5, fails to accumulate quinacrine into vacuoles, other subunits of the catalytic sector are not assembled onto the vacuolar membrane                  |
| <b>YPR036W</b>   | [VMA13] Subunit H of the eight-subunit V1 peripheral membrane domain of the vacuolar H <sup>+</sup> -ATPase (V-ATPase), an electrogenic proton pump found throughout the endomembrane system; serves as an activator or a structural stabilizer of the V-ATPase vacuolar H(+) ATPase V1 sector 54 kDa subunit Null mutant is viable, V-ATPase complex from null mutants is less stable than from wild-type strains                                                                                                            |
| 0324             | GO_TERM:[lipid particle] P-Value:1.2e-13                                                                                                                                                                                                                                                                                                                                                                                                                                                                                      |
| YKR046C          | [PET10] Protein of unknown function that co-purifies with lipid particles; expression pattern suggests a role in respiratory growth; computational analysis of large-scale protein-protein interaction data suggests a role in ATP/ADP exchange                                                                                                                                                                                                                                                                               |
| YIL124W          | [AYR1] NADPH-dependent 1-acyl dihydroxyacetone phosphate reductase found in lipid particles, ER, and mitochondrial outer membrane; involved in phosphatidic acid biosynthesis; required for spore germination; capable of metabolizing steroid hormones 1-acyl dihydroxyacetone phosphate reductase Null mutant is viable. ybr159w/ayr1 double mutant is inviable.                                                                                                                                                            |
| YKL140W          | [TGL1] Steryl ester hydrolase, one of three gene products (Yeh1p, Yeh2p, Tgl1p) responsible for steryl ester hydrolase activity and involved in sterol homeostasis; localized to lipid particle membranes cholesterol esterase triglyceride lipase                                                                                                                                                                                                                                                                            |
| YMR313C          | [TGL3] Triacylglycerol lipase of the lipid particle, responsible for all the TAG lipase activity of the lipid particle; contains the consensus sequence motif GX SXG, which is found in lipolytic enzymes triacylglycerol lipase                                                                                                                                                                                                                                                                                              |
| YBR041W          | [FAT1] Fatty acid transporter and very long-chain fatty acyl-CoA synthetase, may form a complex with Faa1p or Faa4p that imports and activates exogenous fatty acids fatty acid transporter Null mutant is viable, but is Ole- in presence of cerulenin (i.e., unable to grow on YPD supplemented with oleic acid and cerulenin)                                                                                                                                                                                              |
| YKL094W          | [YJU3] Serine hydrolase with sequence similarity to monoglyceride lipase (MGL), localizes to lipid particles                                                                                                                                                                                                                                                                                                                                                                                                                  |
| 0325             | GO_TERM:[transporter activity] P-Value:3.2e-03                                                                                                                                                                                                                                                                                                                                                                                                                                                                                |
| YBR085W          | [AAC3] Mitochondrial inner membrane ADP/ATP translocator, exchanges cytosolic ADP for mitochondrially synthesized ATP; expressed under anaerobic conditions; similar to Pet9p and Aac1p; has roles in maintenance of viability and in respiration ADP/ATP translocator Null mutant is viable; pet9,aac3 double null mutant is inviable under anaerobic conditions                                                                                                                                                             |
| YHR002W          | [LEU5] Mitochondrial carrier protein involved in the accumulation of CoA in the mitochondrial matrix; homolog of human Graves disease protein; does not encode an isozyme of Leu4p, as first hypothesized Null mutant is viable; leu5 mutant is not a leucine auxotroph unless in a leu4 background; glycerol auxotrophy                                                                                                                                                                                                      |
| 0326             |                                                                                                                                                                                                                                                                                                                                                                                                                                                                                                                               |
| YLL055W          |                                                                                                                                                                                                                                                                                                                                                                                                                                                                                                                               |
| YPR062W          | [FCY1] Cytosine deaminase, zinc metalloenzyme that catalyzes the hydrolytic deamination of cytosine to uracil; of biomedical interest because it also catalyzes the deamination of 5-fluorocytosine (5FC) to form anticancer drug 5-fluorouracil (5FU) cytosine deaminase                                                                                                                                                                                                                                                     |
| 0327             | GO_TERM:[cellular_component] P-Value:1.5e-01                                                                                                                                                                                                                                                                                                                                                                                                                                                                                  |
| YBR074W          |                                                                                                                                                                                                                                                                                                                                                                                                                                                                                                                               |
| YBR062C          |                                                                                                                                                                                                                                                                                                                                                                                                                                                                                                                               |
| YMR083W          | [ADH3] Mitochondrial alcohol dehydrogenase isozyme III; involved in the shuttling of mitochondrial NADH to the cytosol under anaerobic conditions and ethanol production alcohol dehydrogenase isoenzyme III                                                                                                                                                                                                                                                                                                                  |
| 0328             | GO_TERM:[molecular_function] P-Value:6.3e-01                                                                                                                                                                                                                                                                                                                                                                                                                                                                                  |

|         |                                                                                                                                                                                                                                                                                                                                                                                                                                                                  |
|---------|------------------------------------------------------------------------------------------------------------------------------------------------------------------------------------------------------------------------------------------------------------------------------------------------------------------------------------------------------------------------------------------------------------------------------------------------------------------|
| YDR400W | [URH1] Uridine nucleosidase (uridine-cytidine N-ribohydrolase), cleaves N-glycosidic bonds in nucleosides; involved in recycling pyrimidine deoxy- and ribonucleosides via the pyrimidine salvage pathway uridine nucleosidase (uridine ribohydrolase); EC 3.2.2.3                                                                                                                                                                                               |
| YCR059C | [YIH1] Protein that inhibits activation of Gcn2p, an eIF2 alpha subunit protein kinase, by competing for Gcn1p binding, thus impacting gene expression in response to starvation; has sequence and functional similarity to the mouse IMPACT gene Null mutant is viable and exhibits no growth defects; derepression of PMN in rich medium.                                                                                                                      |
| YJL160C |                                                                                                                                                                                                                                                                                                                                                                                                                                                                  |
| YLL051C | [FRE6] Putative ferric reductase with similarity to Fre2p; expression induced by low iron levels                                                                                                                                                                                                                                                                                                                                                                 |
| YDR505C | [PSP1] Asn and gln rich protein of unknown function; high-copy suppressor of POL1 (DNA polymerase alpha) and partial suppressor of CDC2 (polymerase delta) and CDC6 (pre-RC loading factor) mutations; overexpression results in growth inhibition Null mutant is viable, exhibits no apparent phenotype; psp1 psp2 double deletion mutants are viable; overexpression of PSP1 causes lethality                                                                  |
| YDL044C | [MTF2] Mitochondrial matrix protein that interacts with an N-terminal region of mitochondrial RNA polymerase (Rpo41p) and couples RNA processing and translation to transcription <u>petite</u>                                                                                                                                                                                                                                                                  |
| YLR139C | [SLS1] Mitochondrial membrane protein required for assembly of respiratory-chain enzyme complexes III and IV; coordinates expression of mitochondrially-encoded genes; may facilitate delivery of mRNA to membrane-bound translation machinery 73 kDa mitochondrial integral membrane protein Null mutant is viable on glucose and inviable on non-fermentable carbon sources; sls1-1 has a pet phenotype and is synthetically lethal with an ssm4 null mutation |

|         |                                                                                                                                                                                                       |
|---------|-------------------------------------------------------------------------------------------------------------------------------------------------------------------------------------------------------|
| 0329    | GO_TERM:[endosome] P-Value:6.2e-06                                                                                                                                                                    |
| YPR185W | [ATG13] Phosphorylated protein that interacts with Vac8p, required for the cytoplasm-to-vacuole targeting (Cvt) pathway and autophagy<br><u>Defective in autophagy</u>                                |
| YNL086W |                                                                                                                                                                                                       |
| YKL061W |                                                                                                                                                                                                       |
| YDR357C |                                                                                                                                                                                                       |
| YGL079W |                                                                                                                                                                                                       |
| YEL005C | [VAB2] Protein with a potential role in vacuolar function, as suggested by its ability to bind Vac8p; green fluorescent protein (GFP)-fusion protein localizes to the cytoplasm in a punctate pattern |
| YLR408C |                                                                                                                                                                                                       |

|                |                                                                                                                                                                                                                                                                                                                     |
|----------------|---------------------------------------------------------------------------------------------------------------------------------------------------------------------------------------------------------------------------------------------------------------------------------------------------------------------|
| 0330           | GO_TERM:[molecular_function] P-Value:9.7e-01 OVERLAP:[mitochondrial ribosomal large subunit] <500.60.10> SIZE:44                                                                                                                                                                                                    |
| <b>YDR115W</b> |                                                                                                                                                                                                                                                                                                                     |
| YHR067W        | [HTD2] Mitochondrial 3-hydroxyacyl-thioester dehydratase involved in fatty acid biosynthesis, required for respiratory growth and for normal mitochondrial morphology                                                                                                                                               |
| YNR015W        | [SMM1] Dihydrouridine synthase, member of a family of dihydrouridine synthases including Dus1p, Smm1p, Dus3p, and Dus4p; modifies uridine residues at position 20 of cytoplasmic tRNAs tRNA dihydrouridine synthase Overexpression weakly suppresses a mutation affecting the maturation of mitochondrial tRNA-Asp. |
| YIL060W        |                                                                                                                                                                                                                                                                                                                     |
| YJL055W        |                                                                                                                                                                                                                                                                                                                     |
| YOR264W        | [DSE3] Daughter cell-specific protein, may help establish daughter fate                                                                                                                                                                                                                                             |

|                |                                                                                                                                                                                                                                                                                                                                                                                                                                                                                                                           |
|----------------|---------------------------------------------------------------------------------------------------------------------------------------------------------------------------------------------------------------------------------------------------------------------------------------------------------------------------------------------------------------------------------------------------------------------------------------------------------------------------------------------------------------------------|
| 0331           | GO_TERM:[Golgi transport complex] P-Value:1.0e-24 OVERLAP:[Golgi transport complex] <260.20.40> SIZE:8                                                                                                                                                                                                                                                                                                                                                                                                                    |
| YGL038C        | [OCH1] Mannosyltransferase of the cis-Golgi apparatus, initiates the polymannose outer chain elongation of N-linked oligosaccharides of glycoproteins alpha-1,6-mannosyltransferase Null mutant is viable, temperature sensitive, lacks mannose outer chains                                                                                                                                                                                                                                                              |
| <b>YNL041C</b> | [COG6] Component of the conserved oligomeric Golgi complex (Cog1p through Cog8p), a cytosolic tethering complex that functions in protein trafficking to mediate fusion of transport vesicles to Golgi compartments                                                                                                                                                                                                                                                                                                       |
| <b>YPR105C</b> | [COG4] Essential component of the conserved oligomeric Golgi complex (Cog1p through Cog8p), a cytosolic tethering complex that functions in protein trafficking to mediate fusion of transport vesicles to Golgi compartments                                                                                                                                                                                                                                                                                             |
| <b>YER157W</b> | [COG3] Essential component of the conserved oligomeric Golgi complex (Cog1p through Cog8p), a cytosolic tethering complex that functions in protein trafficking to mediate fusion of transport vesicles to Golgi compartments Strains carrying the null allele are extremely slow growing; they display a severe growth defect at 25 or 30 degrees, and fail to grow at 14 or 37 degrees. In addition to defects in protein localization and sorting, sec34 mutants exhibit defects in polarization of filamentous actin. |
| <b>YGR120C</b> | [COG2] Essential component of the conserved oligomeric Golgi complex (Cog1p through Cog8p), a cytosolic tethering complex that functions in protein trafficking to mediate fusion of transport vesicles to Golgi compartments Null mutant shows severe growth defect at 30 degrees and is inviable at 21 degrees; sec35-1 allele is temperature-sensitive for growth                                                                                                                                                      |
| <b>YGL005C</b> | [COG7] Component of the conserved oligomeric Golgi complex (Cog1p through Cog8p), a cytosolic tethering complex that functions in protein trafficking to mediate fusion of transport vesicles to Golgi compartments                                                                                                                                                                                                                                                                                                       |
| <b>YNL051W</b> | [COG5] Component of the conserved oligomeric Golgi complex (Cog1p through Cog8p), a cytosolic tethering complex that functions in protein trafficking to mediate fusion of transport vesicles to Golgi compartments                                                                                                                                                                                                                                                                                                       |

|                |                                                                                                                                                                                                                                                                                                                                                                                                                                                                                                                                         |
|----------------|-----------------------------------------------------------------------------------------------------------------------------------------------------------------------------------------------------------------------------------------------------------------------------------------------------------------------------------------------------------------------------------------------------------------------------------------------------------------------------------------------------------------------------------------|
| <b>YGL223C</b> | [COG1] Essential component of the conserved oligomeric Golgi complex (Cog1p through Cog8p), a cytosolic tethering complex that functions in protein trafficking to mediate fusion of transport vesicles to Golgi compartments                                                                                                                                                                                                                                                                                                           |
| <b>YML071C</b> | [COG8] Component of the conserved oligomeric Golgi complex (Cog1p through Cog8p), a cytosolic tethering complex that functions in protein trafficking to mediate fusion of transport vesicles to Golgi compartments                                                                                                                                                                                                                                                                                                                     |
| 0332           | GO_TERM:[lipid binding] P-Value:3.4e-04                                                                                                                                                                                                                                                                                                                                                                                                                                                                                                 |
| YAL053W        | [FLC2] Putative protein of unknown function; green fluorescent protein (GFP)-fusion protein localizes to the cytoplasm                                                                                                                                                                                                                                                                                                                                                                                                                  |
| YML072C        | [TCB3] Contains three calcium and lipid binding domains; localized to the bud; green fluorescent protein (GFP)-fusion protein localizes to the cell periphery; mRNA is targeted to the bud via the mRNA transport system involving She2p; C-terminal portion of Tcb1p, Tcb2p and Tcb3p interact                                                                                                                                                                                                                                         |
| YNL087W        | [TCB2] Bud-specific protein with a potential role in membrane trafficking; GFP-fusion protein migrates from the cell surface to intracellular vesicles near vacuole; contains 3 calcium and lipid binding domains; mRNA is targeted to the bud via the mRNA transport system involving She2p                                                                                                                                                                                                                                            |
| YOR086C        | [TCB1] Contains three calcium and lipid binding domains; green fluorescent protein (GFP)-fusion protein localizes to the cell periphery; C-terminal portion of Tcb1p, Tcb2p and Tcb3p interact                                                                                                                                                                                                                                                                                                                                          |
| 0333           | GO_TERM:[transcriptional activator activity] P-Value:3.0e-03                                                                                                                                                                                                                                                                                                                                                                                                                                                                            |
| YBL005W        | [PDR3] Transcriptional activator of the pleiotropic drug resistance network, regulates expression of ATP-binding cassette (ABC) transporters through binding to cis-acting sites known as PDREs (PDR responsive elements) pleiotropic drug resistance                                                                                                                                                                                                                                                                                   |
| YGL013C        | [PDR1] Zinc cluster protein that is a master regulator involved in recruiting other zinc cluster proteins to pleiotropic drug response elements (PDREs) to fine tune the regulation of multidrug resistance genes zinc finger transcription factor of the Zn(2)-Cys(6) binuclear cluster domain type pleiotropic drug resistance, resistant to borrelidin, oligomycin, antimycin, cycloheximide, antibiotic, thioisoleucine, sulfometuron methyl; accumulation of neutral red                                                           |
| YNL128W        | [TEP1] Homolog of human tumor suppressor gene PTEN/MMAC1/TEP1 that has lipid phosphatase activity and is linked to the phosphatidylinositol signaling pathway; plays a role in normal sporulation tyrosine phosphatase (putative)                                                                                                                                                                                                                                                                                                       |
| YBR149W        | [ARA1] Large subunit of NADP <sup>+</sup> dependent arabinose dehydrogenase, involved in carbohydrate metabolism; small subunit is unidentified D-arabinose dehydrogenase Null mutant is viable but cannot produce D-arabinono-1,4-lactone, a precursor of D-erythroascorbic acid                                                                                                                                                                                                                                                       |
| YDL211C        |                                                                                                                                                                                                                                                                                                                                                                                                                                                                                                                                         |
| 0334           | GO_TERM:[acyltransferase activity] P-Value:7.7e-03                                                                                                                                                                                                                                                                                                                                                                                                                                                                                      |
| YHR178W        | [STB5] Activator of multidrug resistance genes, forms a heterodimer with Pdr1p; contains a Zn(II)2Cys6 zinc finger domain that interacts with a PDRE (pleiotropic drug resistance element) in vitro; binds Sin3p in a two-hybrid assay                                                                                                                                                                                                                                                                                                  |
| YOR377W        | [ATF1] Alcohol acetyltransferase with potential roles in lipid and sterol metabolism; responsible for the major part of volatile acetate ester production during fermentation alcohol acetyltransferase                                                                                                                                                                                                                                                                                                                                 |
| YER144C        | [UBP5] Putative ubiquitin-specific protease that does not associate with the proteasome ubiquitin-specific protease (putative)                                                                                                                                                                                                                                                                                                                                                                                                          |
| YOR034C        | [AKR2] Ankyrin repeat-containing protein similar to Akr1p; member of a family of putative palmitoyltransferases containing an Asp-His-His-Cys-cysteine rich (DHHC-CRD) domain; possibly involved in constitutive endocytosis of Ste3p                                                                                                                                                                                                                                                                                                   |
| YOR171C        | [LCB4] Sphingoid long-chain base kinase, responsible for synthesis of long-chain base phosphates, which function as signaling molecules, regulates synthesis of ceramide from exogenous long-chain bases, localizes to the Golgi and late endosomes sphingoid long chain base (LCB) kinase Null mutant is viable, exhibits 2-3% of wild-type LCB kinase activity; lcb4 is an extragenic suppressor of the sphingosine-sensitive phenotype of a dpl1 deletion mutation; lcb4 lcb5 double deletion mutants exhibit no LCB kinase activity |
| 0335           | GO_TERM:[regulation of actin polymerization and/or depolymerization] P-Value:5.7e-08 OVERLAP:[Actin-associated proteins] <140.20.20> SIZE:25                                                                                                                                                                                                                                                                                                                                                                                            |
| YFR016C        |                                                                                                                                                                                                                                                                                                                                                                                                                                                                                                                                         |
| YGL139W        | [FLC3] Putative protein of unknown function; localized to the mitochondrion                                                                                                                                                                                                                                                                                                                                                                                                                                                             |
| YOR010C        | [TIR2] Putative cell wall mannoprotein of the Srp1p/Tip1p family of serine-alanine-rich proteins; transcription is induced by cold shock and anaerobiosis                                                                                                                                                                                                                                                                                                                                                                               |
| YCL035C        | [GRX1] Hydroperoxide and superoxide-radical responsive heat-stable glutathione-dependent disulfide oxidoreductase with active site cysteine pair; protects cells from oxidative damage EC 1.20.4.1 glutaredoxin Null mutant is viable but sensitive to oxidative stress. grx1 grx2 null mutants are viable but lack heat-stable oxidoreductase activity.                                                                                                                                                                                |
| YBR096W        |                                                                                                                                                                                                                                                                                                                                                                                                                                                                                                                                         |
| YIR003W        |                                                                                                                                                                                                                                                                                                                                                                                                                                                                                                                                         |
| <b>YGR080W</b> | [TWF1] Twinfilin, highly conserved actin monomer-sequestering protein involved in regulation of the cortical actin cytoskeleton, composed of two cofilin-like regions, localizes actin monomers to sites of rapid filament assembly twinfilin A, an actin monomer sequestering protein Null mutant is viable, twf1 null cof1-22 mutants exhibit synthetic lethality                                                                                                                                                                     |
| <b>YIL034C</b> | [CAP2] Beta subunit of the capping protein (CP) heterodimer (Cap1p and Cap2p) which binds to the barbed ends of actin filaments preventing further polymerization; localized predominantly to cortical actin patches capping protein beta subunit Null mutant is viable, exhibits abnormal actin distribution (including loss of actin cables); round, large cells with heterogeneous size distribution; slower growing; chitin found over entire mother cell surface rather than restricted to the mother-bud junction                 |

|                |                                                                                                                                                                                                                                                                                                                                                                                                                                                                                                                                |
|----------------|--------------------------------------------------------------------------------------------------------------------------------------------------------------------------------------------------------------------------------------------------------------------------------------------------------------------------------------------------------------------------------------------------------------------------------------------------------------------------------------------------------------------------------|
| <b>YKL007W</b> | [CAP1] Alpha subunit of the capping protein (CP) heterodimer (Cap1p and Cap2p) which binds to the barbed ends of actin filaments preventing further polymerization; localized predominantly to cortical actin patches capping protein Null mutant is viable; severe deficit of actin cables and increased number of actin spots in the mother; round, relatively large cells                                                                                                                                                   |
| 0336           | GO_TERM:[biological_process] P-Value:3.5e-02                                                                                                                                                                                                                                                                                                                                                                                                                                                                                   |
| YGR016W        |                                                                                                                                                                                                                                                                                                                                                                                                                                                                                                                                |
| YAL049C        |                                                                                                                                                                                                                                                                                                                                                                                                                                                                                                                                |
| YDL025C        |                                                                                                                                                                                                                                                                                                                                                                                                                                                                                                                                |
| YHR009C        |                                                                                                                                                                                                                                                                                                                                                                                                                                                                                                                                |
| YOR359W        | [VTS1] Protein of unknown function, shows genetic interactions with Vti1p, which is a v-SNARE involved in cis-Golgi membrane traffic Null is viable and healthy                                                                                                                                                                                                                                                                                                                                                                |
| 0337           | GO_TERM:[spindle] P-Value:2.2e-03 OVERLAP:[Sister chromatid separation complex] <475.10> SIZE:3                                                                                                                                                                                                                                                                                                                                                                                                                                |
| <b>YGR098C</b> | [ESP1] Separase with cysteine protease activity (related to caspases) that promotes sister chromatid separation by mediating dissociation of the cohesin Scc1p from chromatin; inhibited by Pds1p separase Null mutant is inviable, produces extra spindle pole bodies, shows disrupted cell cycle control                                                                                                                                                                                                                     |
| YOR195W        | [SLK19] Kinetochore-associated protein required for normal segregation of chromosomes in meiosis and mitosis; component of the FEAR regulatory network, which promotes Cdc14p release from the nucleolus during anaphase; potential Cdc28p substrate leucine zipper (putative) Null mutant exhibits long astral microtubules, short spindles, bypass meiosis I, partial mitotic arrest; synthetic lethal with kar3*, loss of both produces mitotic arrest                                                                      |
| 0338           | GO_TERM:[condensin complex] P-Value:9.4e-15 OVERLAP:[Septin filaments] <140.10.20> SIZE:7                                                                                                                                                                                                                                                                                                                                                                                                                                      |
| <b>YGR059W</b> | [SPR3] Sporulation-specific homolog of the yeast CDC3/10/11/12 family of bud neck microfilament genes; septin protein involved in sporulation; regulated by ABFI septin                                                                                                                                                                                                                                                                                                                                                        |
| YMR065W        | [KAR5] Protein required for nuclear membrane fusion during karyogamy, localizes to the membrane with a soluble portion in the endoplasmic reticulum lumen, may form a complex with Jem1p and Kar2p; expression of the gene is regulated by pheromone coiled-coil membrane protein Null mutant is viable, mating defective, nuclear fusion defective                                                                                                                                                                            |
| YFR025C        | [HIS2] Histidinolphosphatase, catalyzes the eighth step in histidine biosynthesis; mutations cause histidine auxotrophy and sensitivity to Cu, Co, and Ni salts; transcription is regulated by general amino acid control histidinolphosphatase Null mutant is viable and requires histidine                                                                                                                                                                                                                                   |
| YFR031C        | [SMC2] Component of the condensin complex, essential SMC chromosomal ATPase family member that forms a complex with Smc4p to form the active ATPase; Smc2p/Smc4p complex binds DNA, possibly in the cleft formed by the coiled-coil of the folded dimer SMC chromosomal ATPase family member[similar to ScII (chicken), XCAPE (xenopus), and cut14 (S. pombe) Null mutant is inviable; ts mutant (smc2-6) confers a defect in chromosome segregation and causes partial chromosome decondensation in cells arrested in mitosis |
| YLR086W        | [SMC4] Subunit of the condensin complex, which reorganizes chromosomes during cell division, forms a stable complex with Smc2p that has ATP-hydrolyzing and DNA-binding activity and promotes knotting of circular DNA; potential Cdc28p substrate SMC chromosomal ATPase family member                                                                                                                                                                                                                                        |
| YBL097W        | [BRN1] Essential protein required for chromosome condensation, likely to function as an intrinsic component of the condensation machinery, may influence multiple aspects of chromosome transmission and dynamics                                                                                                                                                                                                                                                                                                              |
| YDR325W        | [YCG1] Non-SMC subunit of the condensin complex (Smc2p-Smc4p-Ycs4p-Brn1p-Ycg1p); required for establishment and maintenance of chromosome condensation, chromosome segregation and for chromatin binding of the condensin complex condensin High-copy suppressor of brn1                                                                                                                                                                                                                                                       |
| YLR272C        | [YCS4] Non-SMC subunit of the condensin complex (Smc2p-Smc4p-Ycs4p-Brn1p-Ycg1p); required for establishment and maintenance of chromosome condensation, chromosome segregation, chromatin binding of condensin and silencing at the mating type locus Null mutant is viable but exhibits defects in sister chromatid separation and segregation.                                                                                                                                                                               |
| 0339           | GO_TERM:[biological_process] P-Value:9.6e-02                                                                                                                                                                                                                                                                                                                                                                                                                                                                                   |
| YHR159W        |                                                                                                                                                                                                                                                                                                                                                                                                                                                                                                                                |
| YKR044W        | [UIP5] Protein of unknown function that interacts with Ulp1p, a Ubl (ubiquitin-like protein)-specific protease for Smt3p protein conjugates                                                                                                                                                                                                                                                                                                                                                                                    |
| 0340           | GO_TERM:[autophagy] P-Value:2.4e-06                                                                                                                                                                                                                                                                                                                                                                                                                                                                                            |
| YNL242W        | [ATG2] Peripheral membrane protein required for the formation of cytosolic sequestering vesicles involved in vacuolar import through both the Cvt pathway and autophagy; interacts with Atg9p and is necessary for its trafficking peripheral membrane protein The null mutant is viable but blocked in autophagy, pexophagy and import of Ape1 by the cytoplasm to vacuole targeting pathway. Diploids homozygous for the null mutation lack premeiotic DNA synthesis and do not sporulate.                                   |
| YDL149W        | [ATG9] Transmembrane protein involved in formation of Cvt and autophagic vesicles; cycles between the pre-autophagosomal structure and other cytosolic punctate structures, not found in autophagosomes integral membrane protein Null mutant is viable but blocked in autophagy and aminopeptidase I import into vacuole. Temperature-sensitive mutant accumulates membrane-associated, protease-sensitive API.                                                                                                               |
| YLR431C        | [ATG23] Peripheral membrane protein, required for autophagy and for the cytoplasm-to-vacuole targeting (Cvt) pathway                                                                                                                                                                                                                                                                                                                                                                                                           |

|                |                                                                                                                                                                                                                                                                                                                                        |
|----------------|----------------------------------------------------------------------------------------------------------------------------------------------------------------------------------------------------------------------------------------------------------------------------------------------------------------------------------------|
| 0341           | GO_TERM:[mitochondrial processing peptidase activity] P-Value:4.1e-06 OVERLAP:[Processing peptidase] <350.30> SIZE:2                                                                                                                                                                                                                   |
| YLR172C        | [DPH5] Methyltransferase required for synthesis of diphthamide, which is a modified histidine residue of translation elongation factor 2 (Eft1p or Eft2p); not essential for viability; GFP-Dph5p fusion protein localizes to the cytoplasm                                                                                            |
| YOL042W        | [NGL1] Putative endonuclease, has a domain similar to a magnesium-dependent endonuclease motif in mRNA deadenylase Ccr4p DNase (putative)RNase (putative)                                                                                                                                                                              |
| YIL066C        | [RNR3] Ribonucleotide-diphosphate reductase (RNR), large subunit; the RNR complex catalyzes the rate-limiting step in dNTP synthesis and is regulated by DNA replication and DNA damage checkpoint pathways via localization of the small subunits ribonucleotide reductase, large (R1) subunit                                        |
| <b>YLR163C</b> | [MAS1] Smaller subunit of the mitochondrial processing protease, essential processing enzyme that cleaves the N-terminal targeting sequences from mitochondrially imported proteins mitochondrial processing protease subunit Null mutant is inviable; Elevated mitotic recombination and chromosomal missegregation when overproduced |
| <b>YHR024C</b> | [MAS2] Larger subunit of the mitochondrial processing protease, essential processing enzyme that cleaves the N-terminal targeting sequences from mitochondrially imported proteins mitochondrial processing protease 53 kDa subunit                                                                                                    |
| YHR120W        | [MSH1] DNA-binding protein of the mitochondria involved in repair of mitochondrial DNA, has ATPase activity and binds to DNA mismatches; has homology to E. coli MutS; transcription is induced during meiosis mutS homolog Null mutant is viable, petite                                                                              |
| 0342           | GO_TERM:[NatC complex] P-Value:1.6e-10                                                                                                                                                                                                                                                                                                 |
| YCR020C-A      | [MAK31] Non-catalytic subunit of N-terminal acetyltransferase of the NatC type; required for replication of dsRNA virus; member of the Sm protein family Mutant exhibits defects in the structural stability of L-A family of dsRNA-containing viral particles.                                                                        |
| YEL053C        | [MAK10] Non-catalytic subunit of N-terminal acetyltransferase of the NatC type, required for replication of dsRNA virus; expression is glucose-repressible                                                                                                                                                                             |
| YPR051W        | [MAK3] Catalytic subunit of N-terminal acetyltransferase of the NatC type; required for replication of dsRNA virus N-acetyltransferase deficient in maintenance of killer                                                                                                                                                              |
| 0343           | GO_TERM:[endoplasmic reticulum] P-Value:3.5e-01                                                                                                                                                                                                                                                                                        |
| YOR044W        |                                                                                                                                                                                                                                                                                                                                        |
| YPL058C        | [PDR12] Plasma membrane weak-acid-inducible ATP-binding cassette (ABC) transporter, required for weak organic acid resistance, strongly induced by sorbate and benzoate, regulated by War1p, mutants exhibit sorbate hypersensitivity multidrug resistance transporter                                                                 |
| YGL231C        |                                                                                                                                                                                                                                                                                                                                        |
| YAL068C        | [YAL068C] Hypothetical protein                                                                                                                                                                                                                                                                                                         |
| YGL158W        | [RCK1] Protein kinase involved in the response to oxidative stress; identified as suppressor of S. pombe cell cycle checkpoint mutations                                                                                                                                                                                               |
| YLL057C        | [JLP1] Fe(II)-dependent sulfonate/alpha-ketoglutarate dioxygenase, involved in sulfonate catabolism for use as a sulfur source, contains sequence that closely resembles a J domain (typified by the E. coli DnaJ protein)                                                                                                             |
| 0344           | GO_TERM:[cellular_component] P-Value:1.5e-01                                                                                                                                                                                                                                                                                           |
| YNL326C        | [PFA3] Palmitoyltransferase for Vac8p, required for vacuolar membrane fusion; contains an Asp-His-His-Cys-cysteine rich (DHHC-CRD) domain; autoacylates; required for vacuolar integrity under stress conditions palmitoyltransferase for Vac8p                                                                                        |
| YKL224C        | [YKL224C] Putative protein of unknown function                                                                                                                                                                                                                                                                                         |
| YLR030W        |                                                                                                                                                                                                                                                                                                                                        |
| 0345           | GO_TERM:[molecular_function] P-Value:3.4e-01 OVERLAP:[Kinesin-related motorproteins] <140.30.30.10> SIZE:8                                                                                                                                                                                                                             |
| YLR443W        | [ECM7] Non-essential protein of unknown function                                                                                                                                                                                                                                                                                       |
| YJR010W        | [MET3] ATP sulfurylase, catalyzes the primary step of intracellular sulfate activation, essential for assimilatory reduction of sulfate to sulfide, involved in methionine metabolism ATP sulfurylase                                                                                                                                  |
| YDL013W        | [HEX3] Ring finger protein involved in the DNA damage response with possible recombination role; genetically identified by synthetic lethality with SGS1 (DNA helicase) and TOP3 (DNA topoisomerase); sporulation role; interacts with Slx8p and Lin1p null is synthetically lethal with sgs1 null                                     |
| <b>YHR156C</b> | [LIN1] Non-essential component of U5 snRNP; nuclear protein; physically interacts with Irr1p of cohesin complex; may link together proteins involved in chromosome segregation, mRNA splicing and DNA replication                                                                                                                      |
| YOR238W        |                                                                                                                                                                                                                                                                                                                                        |
| 0346           | GO_TERM:[biological_process] P-Value:2.3e-01                                                                                                                                                                                                                                                                                           |
| YML035C        | [AMD1] AMP deaminase, tetrameric enzyme that catalyzes the deamination of AMP to form IMP and ammonia; may be involved in regulation of intracellular adenine nucleotide pools AMP deaminase                                                                                                                                           |

|                |                                                                                                                                                                                                                                                                                                                                                                                                                                                                          |
|----------------|--------------------------------------------------------------------------------------------------------------------------------------------------------------------------------------------------------------------------------------------------------------------------------------------------------------------------------------------------------------------------------------------------------------------------------------------------------------------------|
| YDR504C        | [SPG3] Protein required for survival at high temperature during stationary phase; not required for growth on nonfermentable carbon sources                                                                                                                                                                                                                                                                                                                               |
| YJL070C        |                                                                                                                                                                                                                                                                                                                                                                                                                                                                          |
| 0347           | GO_TERM:[NAD+ kinase activity] P-Value:8.1e-07                                                                                                                                                                                                                                                                                                                                                                                                                           |
| YOR315W        | [SFG1] Nuclear protein, putative transcription factor required for growth of superficial pseudohyphae (which do not invade the agar substrate) but not for invasive pseudohyphal growth; may act together with Phd1p; potential Cdc28p substrate                                                                                                                                                                                                                         |
| YEL041W        | [YEF1] ATP-NADH kinase; phosphorylates both NAD and NADH; homoctameric structure consisting of 60-kDa subunits; sequence similarity to Utr1p and Pos5p; overexpression complements certain pos5 phenotypes                                                                                                                                                                                                                                                               |
| YJR049C        | [UTR1] ATP-NADH kinase; phosphorylates both NAD and NADH; active as a hexamer; enhances the activity of ferric reductase (Fre1p)                                                                                                                                                                                                                                                                                                                                         |
| 0348           | GO_TERM:[coenzyme biosynthesis] P-Value:9.5e-03                                                                                                                                                                                                                                                                                                                                                                                                                          |
| YGL119W        | [ABC1] Protein required for ubiquinone (coenzyme Q) biosynthesis and for respiratory growth; exhibits genetic interaction with COQ9, suggesting a common function; similar to prokaryotic proteins involved in early steps of ubiquinone biosynthesis                                                                                                                                                                                                                    |
| YKL184W        | [SPE1] Ornithine decarboxylase, catalyzes the first step in polyamine biosynthesis; degraded in a proteasome-dependent manner in the presence of excess polyamines ornithine decarboxylase spermidine or putrescine requirement                                                                                                                                                                                                                                          |
| YHR139C        | [SPS100] Protein required for spore wall maturation; expressed during sporulation; may be a component of the spore wall sporulation-specific cell wall maturation protein                                                                                                                                                                                                                                                                                                |
| YPL026C        | [SKS1] Putative serine/threonine protein kinase; involved in the adaptation to low concentrations of glucose independent of the SNF3 regulated pathway Null mutant is viable; Sks1 lacking the consensus ATP binding site cannot suppress snf3 mutants when overexpressed                                                                                                                                                                                                |
| YPL282C        | [YPL282C] Hypothetical protein                                                                                                                                                                                                                                                                                                                                                                                                                                           |
| 0349           | GO_TERM:[biological_process] P-Value:3.0e-02                                                                                                                                                                                                                                                                                                                                                                                                                             |
| YJR061W        |                                                                                                                                                                                                                                                                                                                                                                                                                                                                          |
| YKL168C        | [KKQ8] Putative serine/threonine protein kinase with unknown cellular role                                                                                                                                                                                                                                                                                                                                                                                               |
| YLR012C        |                                                                                                                                                                                                                                                                                                                                                                                                                                                                          |
| 0350           | GO_TERM:[catalytic activity] P-Value:3.0e-01                                                                                                                                                                                                                                                                                                                                                                                                                             |
| YGL185C        |                                                                                                                                                                                                                                                                                                                                                                                                                                                                          |
| YDR191W        | [HST4] Member of the Sir2 family of NAD(+)-dependent protein deacetylases; involved along with Hst3p in silencing at telomeres, cell cycle progression, radiation resistance, genomic stability and short-chain fatty acid metabolism                                                                                                                                                                                                                                    |
| YBL091C-A      | [SCS22] Protein involved in regulation of phospholipid metabolism; homolog of Scs2p2; similar to D. melanogaster intuned protein Null: viable, deletion causes slight inositol auxotrophy at 37C and enhances the inositol auxotrophy of deletion of scs2                                                                                                                                                                                                                |
| YOL113W        | [SKM1] Member of the PAK family of serine/threonine protein kinases with similarity to Ste20p and Cla4p; proposed to be a downstream effector of Cdc42p during polarized growth                                                                                                                                                                                                                                                                                          |
| 0351           | GO_TERM:[coated pit] P-Value:4.0e-13 OVERLAP:[AP-2 complex] <260.20.20> SIZE:4                                                                                                                                                                                                                                                                                                                                                                                           |
| <b>YJR058C</b> | [APS2] Small subunit of the clathrin-associated adaptor complex AP-2, which is involved in protein sorting at the plasma membrane; related to the sigma subunit of the mammalian plasma membrane clathrin-associated protein (AP-2) complex clathrin associated protein complex small subunit null mutant is viable; slight effect on chc1-ts cell growth                                                                                                                |
| <b>YOL062C</b> | [APM4] Mu2-like subunit of the clathrin associated protein complex (AP-2); involved in vesicle transport clathrin associated protein complex medium subunit                                                                                                                                                                                                                                                                                                              |
| <b>YBL037W</b> | [APL3] Alpha-adaptin, large subunit of the clathrin associated protein complex (AP-2); involved in vesicle mediated transport clathrin associated protein complex large subunit                                                                                                                                                                                                                                                                                          |
| <b>YJR005W</b> | [APL1] Beta-adaptin, large subunit of the clathrin associated protein complex (AP-2); involved in vesicle mediated transport; similar to mammalian beta-chain of the clathrin associated protein complex beta-adaptin clathrin associated protein complex large subunit                                                                                                                                                                                                  |
| 0352           | GO_TERM:[protein complex] P-Value:2.3e-01 OVERLAP:[Pho85p complexes] <133.20> SIZE:6                                                                                                                                                                                                                                                                                                                                                                                     |
| YFR032C-A      | [RPL29] Protein component of the large (60S) ribosomal subunit, has similarity to rat L29 ribosomal protein; not essential for translation, but required for proper joining of the large and small ribosomal subunits and for normal translation rate ribosomal protein L29 (YL43)                                                                                                                                                                                       |
| <b>YOL001W</b> | [PHO80] Cyclin, negatively regulates phosphate metabolism; Pho80p-Pho85p (cyclin-CDK complex) phosphorylates Pho4p and Swi5p; deletion of PHO80 leads to aminoglycoside supersensitivity; truncated form of PHO80 affects vacuole inheritance Pho80p cyclin The null mutant is viable but constitutively derepresses PHO5 (acid phosphatase) transcription and is positive for deoxythymidine monophosphate uptake. The null mutant is supersensitive to aminoglycoside. |
| 0353           | GO_TERM:[catalytic activity] P-Value:5.0e-02                                                                                                                                                                                                                                                                                                                                                                                                                             |
| YPL281C        | [ERR2] Protein of unknown function, has similarity to enolases                                                                                                                                                                                                                                                                                                                                                                                                           |

|           |                                                                                                                                                                                                                                                                                                                                                                                                                       |
|-----------|-----------------------------------------------------------------------------------------------------------------------------------------------------------------------------------------------------------------------------------------------------------------------------------------------------------------------------------------------------------------------------------------------------------------------|
| YOL049W   | [GSH2] Glutathione synthetase, catalyzes the ATP-dependent synthesis of glutathione (GSH) from gamma-glutamylcysteine and glycine; induced by oxidative stress and heat shock glutathione synthetase Null mutant is viable, growth was poor under aerobic conditions in minimum medium                                                                                                                                |
| YPL117C   | [IDI1] Isopentenyl diphosphate:dimethylallyl diphosphate isomerase (IPP isomerase), catalyzes an essential activation step in the isoprenoid biosynthetic pathway; required for viability isopentenyl diphosphate:dimethylallyl diphosphate isomerase (IPP isomerase)                                                                                                                                                 |
| YGR001C   |                                                                                                                                                                                                                                                                                                                                                                                                                       |
| YDL179W   | [PCL9] Cyclin, forms a functional kinase complex with Pho85p cyclin-dependent kinase (Cdk), expressed in late M/early G1 phase, activated by Swi5p                                                                                                                                                                                                                                                                    |
| YPR147C   |                                                                                                                                                                                                                                                                                                                                                                                                                       |
| 0354      |                                                                                                                                                                                                                                                                                                                                                                                                                       |
| YCL043C   | [PDI1] Protein disulfide isomerase, multifunctional protein resident in the endoplasmic reticulum lumen, essential for the formation of disulfide bonds in secretory and cell-surface proteins, unscrambles non-native disulfide bonds protein disulfide isomerase                                                                                                                                                    |
| YER189W   |                                                                                                                                                                                                                                                                                                                                                                                                                       |
| 0355      | GO_TERM:[hydrolase activity] P-Value:1.4e-02                                                                                                                                                                                                                                                                                                                                                                          |
| YOR391C   | [HSP33] Possible chaperone and cysteine protease with similarity to E. coli Hsp31 and S. cerevisiae Hsp32p, Hsp33p, and Sno4p; member of the DJ-1/ThiJ/PfpI superfamily, which includes human DJ-1 involved in Parkinson's disease                                                                                                                                                                                    |
| YER093C-A |                                                                                                                                                                                                                                                                                                                                                                                                                       |
| YHR079C   | [IRE1] Serine-threonine kinase and endoribonuclease; transmembrane protein that initiates the unfolded protein response signal by regulating synthesis of Hac1p through HAC1 mRNA splicing endoribonuclease serine-threonine kinase transmembrane protein Null mutant is viable, myo-inositol auxotroph; IRE1 is essential for viability under stress conditions that cause unfolded proteins to accumulate in the ER |
| YLR361C   | [DCR2] Putative phosphoesterase that functions as a dosage-dependent positive regulator of the G1/S phase transition by controlling the timing of START                                                                                                                                                                                                                                                               |
| 0356      | GO_TERM:[molecular_function] P-Value:1.7e-01                                                                                                                                                                                                                                                                                                                                                                          |
| YDR514C   |                                                                                                                                                                                                                                                                                                                                                                                                                       |
| YNL173C   | [MDG1] Plasma membrane protein involved in G-protein mediated pheromone signaling pathway; overproduction suppresses bem1 mutations Null mutant is viable. Deletion of MDG1 causes sterility in cells in which the wild-type G beta has been replaced by partly defective G beta derivatives                                                                                                                          |
| 0357      | GO_TERM:[protein kinase activity] P-Value:1.0e-01                                                                                                                                                                                                                                                                                                                                                                     |
| YML080W   | [DUS1] Dihydrouridine synthase, member of a widespread family of conserved proteins including Smm1p, Dus3p, and Dus4p; modifies pre-tRNA(Phe) at U17 tRNA dihydrouridine synthase                                                                                                                                                                                                                                     |
| YNL077W   | [APJ1] Putative chaperone of the HSP40 (DNAJ) family; overexpression interferes with propagation of the [Psi+] prion J-protein co-chaperone family 20 kDa                                                                                                                                                                                                                                                             |
| YGR012W   |                                                                                                                                                                                                                                                                                                                                                                                                                       |
| YNL065W   | [AQR1] Plasma membrane transporter of the major facilitator superfamily that confers resistance to short-chain monocarboxylic acids and quinidine multidrug resistance transporter Null mutant is viable, but exhibits increased susceptibility to low-chain organic acids (C2-C6), azoles, antimalarial quinoline-ring containing drugs, malachite green and crystal violet                                          |
| YOL125W   |                                                                                                                                                                                                                                                                                                                                                                                                                       |
| YGL186C   | [TPN1] Plasma membrane pyridoxine (vitamin B6) transporter; member of the purine-cytosine permease subfamily within the major facilitator superfamily; proton symporter with similarity to Fcy21p, Fcy2p, and Fcy22p plasma membrane pyridoxine transport protein                                                                                                                                                     |
| YDR518W   | [EUG1] Protein disulfide isomerase of the endoplasmic reticulum lumen, function overlaps with that of Pdi1p; may interact with nascent polypeptides in the ER protein disulfide isomerase homolog                                                                                                                                                                                                                     |
| YMR115W   | [YMR115W] The authentic, non-tagged protein was localized to the mitochondria                                                                                                                                                                                                                                                                                                                                         |
| YKL101W   | [HSL1] Nim1p-related protein kinase that regulates the morphogenesis and septin checkpoints; associates with the assembled septin filament; required along with Hsl1p for bud neck recruitment, phosphorylation, and degradation of Swe1p serine-threonine kinase Null mutant is viable; synthetically lethal with histone H3 mutations; G2 delay                                                                     |
| YNL307C   | [MCK1] Protein serine/threonine/tyrosine (dual-specificity) kinase involved in control of chromosome segregation and in regulating entry into meiosis; related to mammalian glycogen synthase kinases of the GSK-3 family 43.1 kDa serine/threonine/tyrosine protein kinase                                                                                                                                           |
| 0358      | GO_TERM:[catalytic activity] P-Value:1.3e-01                                                                                                                                                                                                                                                                                                                                                                          |
| YDR040C   | [ENA1] P-type ATPase sodium pump, involved in Na <sup>+</sup> and Li <sup>+</sup> efflux to allow salt tolerance P-type ATPase Na <sup>+</sup> pump plasma membrane ATPase Null mutant is sensitive to Na <sup>+</sup>                                                                                                                                                                                                |
| YFL001W   | [DEG1] Non-essential tRNA:pseudouridine synthase, introduces pseudouridines at position 38 or 39 in tRNA, important for maintenance of translation efficiency and normal cell growth, localizes to both the nucleus and cytoplasm Null mutant is viable, but demonstrates depressed growth rate                                                                                                                       |

|           |                                                                                                                                                                                                                                                                                                                                                                                                                                       |
|-----------|---------------------------------------------------------------------------------------------------------------------------------------------------------------------------------------------------------------------------------------------------------------------------------------------------------------------------------------------------------------------------------------------------------------------------------------|
| YDL153C   | [SAS10] Component of the small (ribosomal) subunit (SSU) processosome required for pre-18S rRNA processing; essential nucleolar protein that, when overproduced, disrupts silencing U3 snoRNP protein Null mutant is inviable; derepresses HMR, HML and telomeres when overexpressed                                                                                                                                                  |
| YIL091C   |                                                                                                                                                                                                                                                                                                                                                                                                                                       |
| YJR119C   |                                                                                                                                                                                                                                                                                                                                                                                                                                       |
| 0359      | GO_TERM:[catalytic activity] P-Value:3.0e-01                                                                                                                                                                                                                                                                                                                                                                                          |
| YER098W   | [UBP9] Ubiquitin-specific protease that cleaves ubiquitin-protein fusions ubiquitin carboxyl-terminal hydrolase                                                                                                                                                                                                                                                                                                                       |
| YPR203W   |                                                                                                                                                                                                                                                                                                                                                                                                                                       |
| YKL171W   |                                                                                                                                                                                                                                                                                                                                                                                                                                       |
| YOL163W   |                                                                                                                                                                                                                                                                                                                                                                                                                                       |
| 0360      |                                                                                                                                                                                                                                                                                                                                                                                                                                       |
| YML096W   |                                                                                                                                                                                                                                                                                                                                                                                                                                       |
| YOR233W   | [KIN4] Kinase that acts by inhibiting the mitotic exit network (MEN) when the spindle position checkpoint is activated; localized asymmetrically to mother cell cortex, spindle pole body and bud neck protein kinase                                                                                                                                                                                                                 |
| 0361      |                                                                                                                                                                                                                                                                                                                                                                                                                                       |
| YBR086C   | [IST2] Plasma membrane protein that may be involved in osmotolerance, localizes to the mother cell in small-budded cells and to the bud in medium- and large-budded cells; mRNA is transported to the bud tip by an actomyosin-driven process                                                                                                                                                                                         |
| YOR267C   | [HRK1] Protein kinase implicated in activation of the plasma membrane H(+)-ATPase Pma1p in response to glucose metabolism; plays a role in ion homeostasis protein kinase similar to Npr1                                                                                                                                                                                                                                             |
| 0362      |                                                                                                                                                                                                                                                                                                                                                                                                                                       |
| YDR023W   | [SES1] Cytosolic seryl-tRNA synthetase, class II aminoacyl-tRNA synthetase that aminoacylates tRNA(Ser), displays tRNA-dependent amino acid recognition which enhances discrimination of the serine substrate, interacts with peroxin Pex21p serine-tRNA ligase                                                                                                                                                                       |
| YKR071C   | [DRE2] Protein of unknown function; mutation displays synthetic lethal interaction with the pol3-13 allele of CDC2                                                                                                                                                                                                                                                                                                                    |
| 0363      | GO_TERM:[RNA binding] P-Value:2.7e-02                                                                                                                                                                                                                                                                                                                                                                                                 |
| YLR410W-A |                                                                                                                                                                                                                                                                                                                                                                                                                                       |
| YMR216C   | [SKY1] SR protein kinase (SRPK) involved in regulating proteins involved in mRNA metabolism and cation homeostasis; similar to human SRPK1 Slow growth; Decreased in vivo phosphorylation of npl3p                                                                                                                                                                                                                                    |
| YPR042C   | [PUF2] Member of the PUF protein family, which is defined by the presence of Pumilio homology domains that confer RNA binding activity; preferentially binds mRNAs encoding membrane-associated proteins mRNA binding protein                                                                                                                                                                                                         |
| 0364      | GO_TERM:[biological_process] P-Value:9.6e-02                                                                                                                                                                                                                                                                                                                                                                                          |
| YBR194W   | [YBR194W] Protein proposed to be associated with the nuclear pore complex                                                                                                                                                                                                                                                                                                                                                             |
| YPR152C   | [YPR152C] Pre-mRNA splicing factor that is associated with the U2-U5-U6 snRNPs, the RES complex, and the Prp19-associated complex (NTC); null mutation displays synthetic genetic interactions with mutations affecting U2 snRNA and pre-mRNA splicing factors pre-mRNA splicing factor                                                                                                                                               |
| 0365      | GO_TERM:[nucleic acid binding] P-Value:9.1e-02                                                                                                                                                                                                                                                                                                                                                                                        |
| YNL284C-A |                                                                                                                                                                                                                                                                                                                                                                                                                                       |
| YJR141W   |                                                                                                                                                                                                                                                                                                                                                                                                                                       |
| YHL009C   | [YAP3] Basic leucine zipper (bZIP) transcription factor                                                                                                                                                                                                                                                                                                                                                                               |
| YPL141C   |                                                                                                                                                                                                                                                                                                                                                                                                                                       |
| 0366      | GO_TERM:[molecular_function] P-Value:3.7e-01                                                                                                                                                                                                                                                                                                                                                                                          |
| YLR350W   | [ORM2] Evolutionarily conserved protein with similarity to Orm1p, required for resistance to agents that induce the unfolded protein response; human ortholog is located in the endoplasmic reticulum Endoplasmic reticulum membrane-anchored protein Null: Single knockout is viable. <br> Double ORM1 ORM2 knockout shows impaired growth and high sensitivity to several toxic agents, particularly to tunicamycin, DTT and HgCl2. |

|                |                                                                                                                                                                                                                                                                                                                                                                                                                                                       |
|----------------|-------------------------------------------------------------------------------------------------------------------------------------------------------------------------------------------------------------------------------------------------------------------------------------------------------------------------------------------------------------------------------------------------------------------------------------------------------|
| YGL056C        | [SDS23] One of two <i>S. cerevisiae</i> homologs (Sds23p and Sds24p) of the <i>Schizosaccharomyces pombe</i> Sds23 protein, which genetic studies have implicated in APC/cytosome regulation                                                                                                                                                                                                                                                          |
| YGL179C        | [TOS3] Protein kinase, related to and functionally redundant with Elm1p and Sak1p for the phosphorylation and activation of Snf1p; functionally orthologous to LKB1, a mammalian kinase associated with Peutz-Jeghers cancer-susceptibility syndrome                                                                                                                                                                                                  |
| 0367           | GO_TERM:[transferase activity] P-Value:5.1e-02                                                                                                                                                                                                                                                                                                                                                                                                        |
| YER024W        | [YAT2] Carnitine acetyltransferase; has similarity to Yat1p, which is a carnitine acetyltransferase associated with the mitochondrial outer membrane carnitine acetyltransferase Null: viable. Other phenotypes: The cit2yat2 double mutant does not grow on ethanol, glycerol and acetate in the presence of carnitine.                                                                                                                              |
| YDR330W        | [UBX5] UBX (ubiquitin regulatory X) domain-containing protein that interacts with Cdc48p                                                                                                                                                                                                                                                                                                                                                              |
| YJL187C        | [SWE1] Protein kinase that regulates the G2/M transition by inhibition of Cdc28p kinase activity; localizes to the nucleus and to the daughter side of the mother-bud neck; homolog of <i>S. pombe</i> Wee1p; potential Cdc28p substrate tyrosine kinase Null mutant is viable. <br>Defective for morphogenesis checkpoint                                                                                                                            |
| 0368           | GO_TERM:[peroxisome organization and biogenesis] P-Value:1.8e-04                                                                                                                                                                                                                                                                                                                                                                                      |
| YKL197C        | [PEX1] AAA-family ATPase peroxin required for peroxisome biogenesis, contains two 230 amino acid ATP-binding AAA cassettes, upregulated in anaerobiosis; Pex1p and Pex6p interact via their N-terminal AAA-cassettes AAA ATPase peroxin                                                                                                                                                                                                               |
| YNL329C        | [PEX6] Peroxisomal membrane AAA-family ATPase peroxin required for peroxisome assembly, contains two 230 amino acid ATP-binding AAA cassettes, interacts with Pex1p AAA ATPase lack of peroxisome biogenesis                                                                                                                                                                                                                                          |
| 0369           | GO_TERM:[cortical cytoskeleton organization and biogenesis] P-Value:2.2e-04                                                                                                                                                                                                                                                                                                                                                                           |
| YBR129C        | [OPY1] Protein of unknown function, overproduction blocks cell cycle arrest in the presence of mating pheromone                                                                                                                                                                                                                                                                                                                                       |
| YIL095W        | [PRK1] Protein serine/threonine kinase; regulates the organization and function of the actin cytoskeleton through the phosphorylation of the Pan1p-Sla1p-End3p protein complex serine/threonine protein kinase Null mutant is viable. Strains that overexpress Prk1 are inviable.                                                                                                                                                                     |
| YOR329C        | [SCD5] Protein required for normal cortical actin organization and endocytosis; multicopy suppressor of clathrin deficiency; acts as a targeting subunit for protein phosphatase type 1                                                                                                                                                                                                                                                               |
| 0370           | GO_TERM:[catalytic activity] P-Value:1.8e-01 OVERLAP:[STE5-MAPK complex] <470.20> SIZE:5                                                                                                                                                                                                                                                                                                                                                              |
| YPR139C        | [VPS66] Cytoplasmic protein of unknown function involved in vacuolar protein sorting. Null mutant secretes CPY.                                                                                                                                                                                                                                                                                                                                       |
| <b>YBL016W</b> | [FUS3] Mitogen-activated protein kinase involved in mating pheromone response; activated by phosphorylation by Ste7p; provides specificity during the mating vs. filamentous growth response by phosphorylating transcriptional and cytoplasmic targets CDC28/cdc2 related protein kinase sterile; divide continuously in the presence of pheromones; form prezygotes with wild-type cells of opposite mating type but cannot undergo cell fusion     |
| YOL023W        | [IFM1] Mitochondrial translation initiation factor 2 mitochondrial initiation factor 2 Null mutant is viable but is respiratory-deficient and has defects in mitochondrial protein synthesis                                                                                                                                                                                                                                                          |
| 0371           | GO_TERM:[protein serine/threonine kinase activity] P-Value:7.0e-08 OVERLAP:[Casein kinase I] <120.10> SIZE:4                                                                                                                                                                                                                                                                                                                                          |
| YHR082C        | [KSP1] Nonessential putative serine/threonine protein kinase of unknown cellular role; overproduction causes allele-specific suppression of the prp20-10 mutation                                                                                                                                                                                                                                                                                     |
| YJL095W        | [BCK1] Mitogen-activated protein (MAP) kinase kinase kinase acting in the protein kinase C signaling pathway, which controls cell integrity; upon activation by Pkc1p phosphorylates downstream kinases Mkk1p and Mkk2p MEKK Null mutants are temperature-sensitive and exhibit cell lysis, which can be rescued by 1M sorbitol; null mutants grow very poorly even at the permissive temperature. Some dominant alleles suppress a pkc1 null mutant. |
| <b>YHR135C</b> | [YCK1] Palmitoylated, plasma membrane-bound casein kinase I isoform; shares redundant functions with Yck2p in morphogenesis, proper septin assembly, endocytic trafficking; provides an essential function overlapping with that of Yck2p casein kinase I homolog Null mutant is viable; yck1 yck2 double deletion mutants are inviable; yck1 point mutants suppress defective Snf1p kinase activity in snf4 strains                                  |
| <b>YNL154C</b> | [YCK2] Palmitoylated, plasma membrane-bound casein kinase I isoform; shares redundant functions with Yck1p in morphogenesis, proper septin assembly, endocytic trafficking; provides an essential function overlapping with that of Yck1p casein kinase I homolog Null mutant is viable; yck1 yck2 double deletion mutant is inviable                                                                                                                 |
| 0372           | GO_TERM:[phosphorus metabolism] P-Value:3.4e-02                                                                                                                                                                                                                                                                                                                                                                                                       |
| YDL236W        | [PHO13] Alkaline phosphatase specific for p-nitrophenyl phosphate, involved in dephosphorylation of histone II-A and casein p-nitrophenyl phosphatase                                                                                                                                                                                                                                                                                                 |
| YDR411C        | [DFM1] Protein of unknown function, localizes to the ER, contains four transmembrane domains; member of the Der1p-like family                                                                                                                                                                                                                                                                                                                         |
| YJL106W        | [IME2] Serine/threonine protein kinase involved in activation of meiosis, associates with Ime1p and mediates its stability, activates Ndt80p; IME2 expression is positively regulated by Ime1p Null mutant is viable, homozygous null mutants are sporulation defective. High copy IME2 stimulates meiotic recombination without starvation and permits meiosis in an ime1 null background                                                            |
| 0373           |                                                                                                                                                                                                                                                                                                                                                                                                                                                       |

|                         |                                                                                                                                                                                                                                                                                                                                                                  |
|-------------------------|------------------------------------------------------------------------------------------------------------------------------------------------------------------------------------------------------------------------------------------------------------------------------------------------------------------------------------------------------------------|
| YDR536W                 | [STL1] Glycerol proton symporter of the plasma membrane, subject to glucose-induced inactivation, strongly but transiently induced when cells are subjected to osmotic shock sugar transporter-like protein Null mutant is viable, no growth defects on galactose, mannose, maltose, or glycerol.                                                                |
| YIL135C                 | [VHS2] Cytoplasmic protein of unknown function; identified as a high-copy suppressor of the synthetic lethality of a <i>sis2 sit4</i> double mutant, suggesting a role in G1/S phase progression; similar to Mlf3p                                                                                                                                               |
| 0374                    |                                                                                                                                                                                                                                                                                                                                                                  |
| YDR229W                 | [IVY1] Phospholipid-binding protein that interacts with both Ypt7p and Vps33p, may partially counteract the action of Vps33p and vice versa, localizes to the rim of the vacuole as cells approach stationary phase                                                                                                                                              |
| YJL016W                 |                                                                                                                                                                                                                                                                                                                                                                  |
| 0375                    | GO_TERM:[nuclear organization and biogenesis] P-Value:5.2e-03 OVERLAP:[Nem1p-Spo7p complex] <295> SIZE:2                                                                                                                                                                                                                                                         |
| YOL016C                 | [CMK2] Calmodulin-dependent protein kinase; may play a role in stress response, many CA <sup>++</sup> /calmodulin dependent phosphorylation substrates demonstrated in vitro, amino acid sequence similar to Cmk1p and mammalian Cam Kinase II calmodulin-dependent protein kinase Null mutant is viable, exhibits slow rate of spore germination                |
| YMR165C                 | [PAH1] Mg <sup>2+</sup> -dependent phosphatidate (PA) phosphatase, catalyzes the dephosphorylation of PA to yield diacylglycerol and P <sub>i</sub> , responsible for de novo lipid synthesis; homologous to mammalian lipin 1 phosphatidate phosphohydrolase Null mutant is viable, respiration deficient and show increased stability of heterologous plasmids |
| <a href="#">YAL009W</a> | [SPO7] Integral nuclear/ER membrane protein of unknown function, required for normal nuclear envelope morphology and sporulation Null mutant is viable, sporulation defective                                                                                                                                                                                    |
| <a href="#">YHR004C</a> | [NEM1] Protein of the nuclear envelope required for the spherical shape of the nucleus; required for normal sporulation Null mutant is viable but exhibits slow growth at 37 deg. and 16 deg and has an abnormal nuclear envelope. Homozygous diploid null mutants exhibit defects in sporulation.                                                               |
| 0376                    | GO_TERM:[catalytic activity] P-Value:6.3e-02 OVERLAP:[Pho85p complexes] <133.20> SIZE:6                                                                                                                                                                                                                                                                          |
| YOL066C                 | [RIB2] DRAP deaminase, catalyzes the third step of the riboflavin biosynthesis pathway; cytoplasmic tRNA pseudouridine synthase involved in pseudouridylation of cytoplasmic tRNAs at position 32 DRAP deaminase/pseudouridine synthase                                                                                                                          |
| YER061C                 | [CEM1] Mitochondrial beta-keto-acyl synthase with possible role in fatty acid synthesis; required for mitochondrial respiration beta-keto-acyl synthase homolog Null mutant is viable; exhibits respiratory-deficient growth                                                                                                                                     |
| <a href="#">YDL127W</a> | [PCL2] G1 cyclin, associates with Pho85p cyclin-dependent kinase (Cdk) to contribute to entry into the mitotic cell cycle, essential for cell morphogenesis; localizes to sites of polarized cell growth G1 cyclin                                                                                                                                               |
| YPR026W                 | [ATH1] Acid trehalase required for utilization of extracellular trehalose acid trehalase Null mutant is viable; shows lack of vacuolar acid trehalase activity                                                                                                                                                                                                   |
| 0377                    | GO_TERM:[magnesium ion transport] P-Value:1.3e-05                                                                                                                                                                                                                                                                                                                |
| YIL009W                 | [FAA3] Long chain fatty acyl-CoA synthetase, has a preference for C16 and C18 fatty acids; green fluorescent protein (GFP)-fusion protein localizes to the cell periphery acyl-CoA synthase Not essential for vegetative growth when fatty acid synthase (fas) is active                                                                                         |
| YFL050C                 | [ALR2] Probable Mg(2+) transporter; overexpression confers increased tolerance to Al(3+) and Ga(3+) ions Null mutant is viable, overexpression increases resistance to aluminum and gallium toxicity                                                                                                                                                             |
| YOL130W                 | [ALR1] Plasma membrane Mg(2+) transporter, expression and turnover are regulated by Mg(2+) concentration; overexpression confers increased tolerance to Al(3+) and Ga(3+) ions Null mutant is inviable; overexpression increases resistance to aluminum and gallium toxicity                                                                                     |
| 0378                    | GO_TERM:[transferase activity] P-Value:1.8e-02                                                                                                                                                                                                                                                                                                                   |
| YIL107C                 | [PFK26] 6-phosphofructo-2-kinase, inhibited by phosphoenolpyruvate and sn-glycerol 3-phosphate, has negligible fructose-2,6-bisphosphatase activity, transcriptional regulation involves protein kinase A 6-phosphofructose-2-kinase Null mutant is viable; on pyruvate medium, no fructose 2,6-P2 is detectable in mutant                                       |
| YLR089C                 | [YLR089C] Putative alanine transaminase (glutamic pyruvic transaminase)                                                                                                                                                                                                                                                                                          |
| 0379                    | GO_TERM:[energy derivation by oxidation of organic compounds] P-Value:3.0e-02                                                                                                                                                                                                                                                                                    |
| YLR273C                 | [PIG1] Putative targeting subunit for the type-1 protein phosphatase Glc7p that tethers it to the Gsy2p glycogen synthase type-1 protein phosphatase regulatory subunit                                                                                                                                                                                          |
| YJL118W                 |                                                                                                                                                                                                                                                                                                                                                                  |
| YKL093W                 | [MBR1] Protein involved in mitochondrial functions and stress response; overexpression suppresses growth defects of hap2, hap3, and hap4 mutants Null mutant is viable, shows defective growth on glycerol                                                                                                                                                       |
| YOR239W                 | [ABP140] Nonessential protein that binds actin filaments and localizes to actin patches and cables, has similarity to S-adenosylmethionine (AdoMet)-dependent methyltransferases actin filament binding protein                                                                                                                                                  |

|                |                                                                                                                                                                                                                                                                                                                                                                                                                                         |
|----------------|-----------------------------------------------------------------------------------------------------------------------------------------------------------------------------------------------------------------------------------------------------------------------------------------------------------------------------------------------------------------------------------------------------------------------------------------|
| 0380           | GO_TERM:[catalytic activity] P-Value:7.3e-02                                                                                                                                                                                                                                                                                                                                                                                            |
| YLR047C        | [FRE8] Protein with sequence similarity to iron/copper reductases, involved in iron homeostasis; deletion mutant has iron deficiency/accumulation growth defects; expression increased in the absence of copper-responsive transcription factor Mac1p                                                                                                                                                                                   |
| YOR351C        | [MEK1] Meiosis-specific serine/threonine protein kinase, functions in meiotic checkpoint, phosphorylates Red1p, interacts with Hop1p; required for meiotic recombination and normal spore viability meiosis-specific serine/threonine protein kinase Null mutant is viable, however diploids homozygous for a mek1 null mutation produce only low percentages of viable spores, reduced spore viability is rescued by spo13 mutations   |
| 0381           | GO_TERM:[transferase activity] P-Value:5.1e-02 OVERLAP:[Pho85p complexes] <133.20> SIZE:6                                                                                                                                                                                                                                                                                                                                               |
| YBL011W        | [SCT1] Glycerol 3-phosphate/dihydroxyacetone phosphate dual substrate-specific sn-1 acyltransferase of the glycerolipid biosynthesis pathway, prefers 16-carbon fatty acids, similar to Gpt2p, gene is constitutively transcribed glycerol 3-phosphate/dihydroxyacetone phosphate dual substrate-specific sn-1 acyltransferase                                                                                                          |
| YJL084C        |                                                                                                                                                                                                                                                                                                                                                                                                                                         |
| <b>YPL031C</b> | [PHO85] Cyclin-dependent kinase, with ten cyclin partners; involved in environmental stress response; in phosphate-rich conditions, Pho85p-Pho80p complex phosphorylates Pho4p which in turn represses PHO5 cyclin-dependent protein kinase                                                                                                                                                                                             |
| 0382           |                                                                                                                                                                                                                                                                                                                                                                                                                                         |
| YFR017C        |                                                                                                                                                                                                                                                                                                                                                                                                                                         |
| YJL212C        | [OPT1] Plasma membrane transporter that transports tetra- and pentapeptides and glutathione; member of the OPT family glutathione transporter peptide transporter Null mutant is viable, exhibits loss of plasma membrane glutathione transport                                                                                                                                                                                         |
| 0383           | GO_TERM:[cyclic nucleotide-dependent protein kinase activity] P-Value:7.0e-08 OVERLAP:[cAMP-dependent protein kinase] <110> SIZE:4                                                                                                                                                                                                                                                                                                      |
| YKL116C        | [PRR1] Protein kinase with a possible role in MAP kinase signaling in the pheromone response pathway protein kinase                                                                                                                                                                                                                                                                                                                     |
| YMR184W        | [ADD37] Protein of unknown function involved in ER-associated protein degradation                                                                                                                                                                                                                                                                                                                                                       |
| YOR113W        | [AZF1] Zinc-finger transcription factor, involved in induction of CLN3 transcription in response to glucose; genetic and physical interactions indicate a possible role in mitochondrial transcription or genome maintenance                                                                                                                                                                                                            |
| YOR002W        | [ALG6] Glucosyltransferase, involved in transfer of oligosaccharides from dolichyl pyrophosphate to asparagine residues of proteins during N-linked protein glycosylation; mutations in human ortholog are associated with disease glucosyltransferase Null mutant is viable and defective in protein glycosylation.                                                                                                                    |
| YJR001W        | [AVT1] Vacuolar transporter, imports large neutral amino acids into the vacuole; member of a family of seven S. cerevisiae genes (AVT1-7) related to vesicular GABA-glycine transporters Gln (Asn), Ile (Leu), Tyr transporter                                                                                                                                                                                                          |
| YOR134W        | [BAG7] Rho GTPase activating protein (RhoGAP), stimulates the intrinsic GTPase activity of Rho1p, which plays a role in actin cytoskeleton organization and control of cell wall synthesis; structurally and functionally related to Sac7p GTPase activating protein (GAP) Null mutant is viable; overexpression suppresses sac7 null mutation                                                                                          |
| YKL064W        | [MNR2] Putative magnesium transporter; has similarity to Alr1p and Alr2p, which mediate influx of Mg <sup>2+</sup> and other divalent cations overexpression overcomes manganese toxicity                                                                                                                                                                                                                                               |
| YMR081C        | [ISF1] Serine-rich, hydrophilic protein with similarity to Mbr1p; overexpression suppresses growth defects of hap2, hap3, and hap4 mutants; expression is under glucose control; cotranscribed with NAM7 in a cyp1 mutant Null mutant is viable; overexpression suppresses defects in hap2, hap3, and hap3 mutants; isf1 mbr1 double mutant has synthetic phenotypes                                                                    |
| YPL056C        |                                                                                                                                                                                                                                                                                                                                                                                                                                         |
| YJR059W        | [PTK2] Putative serine/threonine protein kinase involved in regulation of ion transport across plasma membrane; enhances spermine uptake Mutant shows reduced spermine and putrescine uptake and is resistant to toxic polyamine analogs and Li <sup>+</sup> and Na <sup>+</sup> ions; ptk1 ptk2 double mutant shows virtually abolished high-affinity spermidine transport                                                             |
| <b>YJL164C</b> | [TPK1] Subunit of cytoplasmic cAMP-dependent protein kinase, which contains redundant catalytic subunits Tpk1p, Tpk2p, and Tpk3p and regulatory subunit Bcy1p; promotes vegetative growth in response to nutrients; inhibits filamentous growth cAMP-dependent protein kinase catalytic subunit (putative) multicopy suppression of ras mutant                                                                                          |
| <b>YPL203W</b> | [TPK2] Subunit of cytoplasmic cAMP-dependent protein kinase, which contains redundant catalytic subunits Tpk1p, Tpk2p, and Tpk3p and regulatory subunit Bcy1p; promotes vegetative growth in response to nutrients; activates filamentous growth cAMP-dependent protein kinase catalytic subunit Null mutant haploids are defective for invasive growth; diploid homozygous null mutants are defective for pseudohyphal growth.         |
| YGL059W        |                                                                                                                                                                                                                                                                                                                                                                                                                                         |
| <b>YKL166C</b> | [TPK3] Subunit of cytoplasmic cAMP-dependent protein kinase, which contains redundant catalytic subunits Tpk1p, Tpk2p, and Tpk3p and regulatory subunit Bcy1p; promotes vegetative growth in response to nutrients; inhibits filamentous growth cAMP-dependent protein kinase catalytic subunit Null mutant is viable, tpk1 tpk2 tpk3 triple mutant is inviable                                                                         |
| 0384           | GO_TERM:[cellular lipid metabolism] P-Value:2.1e-02                                                                                                                                                                                                                                                                                                                                                                                     |
| YCR048W        | [ARE1] Acyl-CoA:sterol acyltransferase, isozyme of Are2p; endoplasmic reticulum enzyme that contributes the major sterol esterification activity in the absence of oxygen acyl-CoA cholesterol acyltransferase (sterol-ester synthetase) Null mutant is viable, slightly reduces in vivo and in vitro ergosterol esterification. Deletion of both ARE1 and ARE2 completely eliminates of in vivo and in vitro ergosterol esterification |
| YCL026C-A      | [FRM2] Protein of unknown function, involved in the integration of lipid signaling pathways with cellular homeostasis Null mutant is viable and sensitive to arachidonic acid                                                                                                                                                                                                                                                           |
| YLR177W        |                                                                                                                                                                                                                                                                                                                                                                                                                                         |

|                |                                                                                                                                                                                                                                                                                                                                                                                                                                                                                                                                                                         |
|----------------|-------------------------------------------------------------------------------------------------------------------------------------------------------------------------------------------------------------------------------------------------------------------------------------------------------------------------------------------------------------------------------------------------------------------------------------------------------------------------------------------------------------------------------------------------------------------------|
| 0385           | GO_TERM:[cell organization and biogenesis] P-Value:5.9e-01 OVERLAP:[Mitochondrial processing complexes] <440.20> SIZE:4                                                                                                                                                                                                                                                                                                                                                                                                                                                 |
| YKL114C        | [APN1] Major apurinic/aprimidinic endonuclease, 3'-repair diesterase involved in repair of DNA damage by oxidation and alkylating agents; controls spontaneous mutations major apurinic/aprimidinic endonuclease/3'-repair diesterase hypersensitive to both oxidative and alkylating agents that damage DNA; higher rate of spontaneous mutation                                                                                                                                                                                                                       |
| <b>YDL069C</b> | [CBS1] Mitochondrial translational activator of the COB mRNA; membrane protein that interacts with translating ribosomes, acts on the COB mRNA 5'-untranslated leader translational activator of cytochrome B                                                                                                                                                                                                                                                                                                                                                           |
| YKL164C        | [PIR1] O-glycosylated protein required for cell wall stability; attached to the cell wall via beta-1,3-glucan; mediates mitochondrial translocation of Apn1p; expression regulated by the cell integrity pathway and by Swi5p during the cell cycle Null mutant is viable; pir1 hsp150 (pir2) double mutant and pir1 hsp150 (pir2) pir3 triple mutant are slow-growing on agar slab and sensitive to heat shock                                                                                                                                                         |
| 0386           | GO_TERM:[plasma membrane part] P-Value:2.5e-03                                                                                                                                                                                                                                                                                                                                                                                                                                                                                                                          |
| YOR196C        | [LIP5] Protein involved in biosynthesis of the coenzyme lipoic acid, has similarity to E. coli lipoic acid synthase lipoic acid synthase Null mutant is viable; cannot synthesize lipoic acid; grows slowly on ethanol-rich media; barely grows on glycerol-rich media; undergoes a high frequency of mitochondrial DNA deletions                                                                                                                                                                                                                                       |
| YIL140W        | [AXL2] Integral plasma membrane protein required for axial budding in haploid cells, localizes to the incipient bud site and bud neck; glycosylated by Pmt4p; potential Cdc28p substrate                                                                                                                                                                                                                                                                                                                                                                                |
| YJL129C        | [TRK1] Component of the Trk1p-Trk2p potassium transport system; 180 kDa high affinity potassium transporter 180 kDa high affinity potassium transporter Null mutant is viable, requires added potassium; trk1 trk2 double mutants are viable                                                                                                                                                                                                                                                                                                                            |
| 0387           | GO_TERM:[biological process] P-Value:2.3e-01                                                                                                                                                                                                                                                                                                                                                                                                                                                                                                                            |
| YJL105W        | [SET4] Protein of unknown function, contains a SET domain                                                                                                                                                                                                                                                                                                                                                                                                                                                                                                               |
| YCR017C        | [CWH43] Putative sensor/transporter protein involved in cell wall biogenesis; contains 14-16 transmembrane segments and several putative glycosylation and phosphorylation sites; null mutation is synthetically lethal with pkc1 deletion                                                                                                                                                                                                                                                                                                                              |
| YGR052W        | [YGR052W] The authentic, non-tagged protein was localized to the mitochondria                                                                                                                                                                                                                                                                                                                                                                                                                                                                                           |
| 0388           | GO_TERM:[regulation of kinase activity] P-Value:2.1e-05                                                                                                                                                                                                                                                                                                                                                                                                                                                                                                                 |
| YBR139W        |                                                                                                                                                                                                                                                                                                                                                                                                                                                                                                                                                                         |
| YOR381W        | [FRE3] Ferric reductase, reduces siderophore-bound iron prior to uptake by transporters; expression induced by low iron levels ferric reductase transmembrane component                                                                                                                                                                                                                                                                                                                                                                                                 |
| YNR019W        | [ARE2] Acyl-CoA:sterol acyltransferase, isozyme of Are1p; endoplasmic reticulum enzyme that contributes the major sterol esterification activity in the presence of oxygen acyl-CoA cholesterol acyltransferase (sterol-ester synthetase) Null mutant is viable; greatly reduces in vivo and in vitro ergosterol esterification (to 15 - 35 % of wild-type). Deletion of both ARE1 and ARE2 completely eliminates in vivo and in vitro ergosterol esterification                                                                                                        |
| YDL006W        | [PTC1] Type 2C protein phosphatase (PP2C); inactivates the osmosensing MAPK cascade by dephosphorylating Hog1p; mutation delays mitochondrial inheritance; deletion reveals defects in precursor tRNA splicing, sporulation and cell separation Null mutant is viable; exhibits synthetic phenotypes in combination with ptp2, kcs1, and mpk1 (slt2) mutants; ptc1 mutations suppress the hyper-recombination of pkc1 mutants                                                                                                                                           |
| YDR162C        | [NBP2] Protein involved in the HOG (high osmolarity glycerol) pathway, negatively regulates Hog1p by recruitment of phosphatase Ptc1p the Pbs2p-Hog1p complex, found in the nucleus and cytoplasm, contains an SH3 domain that binds Pbs2p                                                                                                                                                                                                                                                                                                                              |
| YJL128C        | [PBS2] MAP kinase kinase that plays a pivotal role in the osmosensing signal-transduction pathway, activated under severe osmotic stress MAP kinase kinase (MEK) may act as a scaffolding protein for Sho1p, Ste11p, and Hog1p Null mutant is viable, sensitive to high osmolarity, sensitive to the antibiotic polymyxin B; shows marked decreased induction of transcription by osmotic stress that is mediated by stress response elements; a deletion in RGA1 and PBS2 activates the pheromone-dependent signal transduction pathway independently of the G protein |
| 0389           | GO_TERM:[meiotic DNA double-strand break formation] P-Value:3.5e-08                                                                                                                                                                                                                                                                                                                                                                                                                                                                                                     |
| YHR157W        | [REC104] Protein involved in early stages of meiotic recombination; required for meiotic crossing over; forms a complex with Rec102p and Spo11p necessary during the initiation of recombination meiosis-specific protein Null mutant is viable, rec104 mutants exhibit reduced meiotic DNA recombination, executes meiosis I early; rec104 is rescued by spo13 and is epistatic to rad52 spo13                                                                                                                                                                         |
| YHL022C        | [SPO11] Meiosis-specific protein that initiates meiotic recombination by catalyzing the formation of double-strand breaks in DNA via a transesterification reaction; required for homologous chromosome pairing and synaptonemal complex formation early meiosis-specific recombination protein                                                                                                                                                                                                                                                                         |
| YLR329W        | [REC102] Protein involved in early stages of meiotic recombination; required for chromosome synapsis; forms a complex with Rec104p and Spo11p necessary during the initiation of recombination 23 kDa protein containing a putative leucine zipper/meiosis specific recombination protein Reduced meiotic recombination; inviable spores; mutant is rescued by spo13 and is epistatic to rad52                                                                                                                                                                          |
| 0390           | GO_TERM:[meiotic recombination] P-Value:7.2e-05                                                                                                                                                                                                                                                                                                                                                                                                                                                                                                                         |
| YBR261C        |                                                                                                                                                                                                                                                                                                                                                                                                                                                                                                                                                                         |
| YDR465C        | [RMT2] Arginine methyltransferase; ribosomal protein L12 is a substrate arginine methyltransferase                                                                                                                                                                                                                                                                                                                                                                                                                                                                      |
| YJR021C        | [REC107] Protein involved in early stages of meiotic recombination; involved in altering chromatin structure at DNA double-stranded break sites and in coordination between the initiation of recombination and the first division of meiosis ds break formation complex subunit reduced meiotic recombination                                                                                                                                                                                                                                                          |

|                         |                                                                                                                                                                                                                                                                                                                                                                                                                                                                                                                                                                             |
|-------------------------|-----------------------------------------------------------------------------------------------------------------------------------------------------------------------------------------------------------------------------------------------------------------------------------------------------------------------------------------------------------------------------------------------------------------------------------------------------------------------------------------------------------------------------------------------------------------------------|
| YER044C-A               | [MEI4] Meiosis-specific protein involved in recombination; required for chromosome synapsis; required for production of viable spores 88 bp intron at 5' end spliced independently of MER1 meiosis-specific protein Loss of full chromosome pairing, heteroduplex DNA, synaptonemal complexes, meiotic intra- and interchromosomal gene conversion, reciprocal recombination and viable spores. mei4 executes both divisions with a delay in meiosis II, is rescued by spo13 and is epistatic to rad52                                                                      |
| YMR133W                 | [REC114] Protein involved in early stages of meiotic recombination; possibly involved in the coordination of recombination and meiotic division; mutations lead to premature initiation of the first meiotic division early sporulation protein reduced meiotic recombination, rec114 mutants execute meiosis I early, are rescued by spo13 and are epistatic to rad52 spo13                                                                                                                                                                                                |
| 0391                    | GO_TERM:[two-component signal transduction system (phosphorelay)] P-Value:7.1e-09                                                                                                                                                                                                                                                                                                                                                                                                                                                                                           |
| YIR004W                 | [DJP1] Cytosolic J-domain-containing protein, required for peroxisomal protein import and involved in peroxisome assembly, homologous to E. coli DnaJ Null mutant is viable but shows partial mislocalisation of peroxisomal matrix proteins to the cytosol                                                                                                                                                                                                                                                                                                                 |
| YNR031C                 | [SSK2] MAP kinase kinase kinase of the HOG1 mitogen-activated signaling pathway; interacts with Ssk1p, leading to autophosphorylation and activation of Ssk2p which phosphorylates Pbs2p; also mediates actin cytoskeleton recovery from osmotic stress MAP kinase kinase kinase activator of Pbs2p Suppresses sln1 lethality. Synthetically high-osmolarity sensitive when it is combined with both ssk22 and sho1 mutations                                                                                                                                               |
| YLR006C                 | [SSK1] Cytoplasmic response regulator, part of a two-component signal transducer that mediates osmosensing via a phosphorelay mechanism; dephosphorylated form is degraded by the ubiquitin-proteasome system; potential Cdc28p substrate two-component signal transducer that with Sln1p regulates osmosensing MAP kinase cascade (suppressor of sensor kinase) Null mutant is viable; suppresses the lethality of sln1 or ypd1 disruption mutants                                                                                                                         |
| YHR206W                 | [SKN7] Nuclear response regulator and transcription factor, part of a branched two-component signaling system; required for optimal induction of heat-shock genes in response to oxidative stress; involved in osmoregulation                                                                                                                                                                                                                                                                                                                                               |
| YJR074W                 | [MOG1] Conserved nuclear protein that interacts with GTP-Gsp1p, which is a Ran homolog of the Ras GTPase family, and stimulates nucleotide release, involved in nuclear protein import, nucleotide release is inhibited by Yrb1p nuclear protein that interacts with GTP-Gsp1p Null mutant is viable, temperature sensitive, exhibits defects in nuclear-protein import; MOG1 overexpression suppresses the temperature sensitivity of gsp1 strains; overexpression of NTF2 or GSP1 can suppress the ts phenotype of mog1                                                   |
| YDL235C                 | [YPD1] Phosphorelay intermediate protein, phosphorylated by the plasma membrane sensor Sln1p in response to osmotic stress and then in turn phosphorylates the response regulators Ssk1p in the cytosol and Skn7p in the nucleus two-component phosphorelay intermediate Null mutant is inviable due to the persistent activation of HOG1 MAP kinase cascade. The ypd1 lethality can be suppressed by overexpression of the tyrosine phosphatase gene PTP2, or by inactivation of either one of SSK1, SSK2, PBS2, or HOG1 genes.                                            |
| YIL147C                 | [SLN1] Histidine kinase osmosensor that regulates a MAP kinase cascade; transmembrane protein with an intracellular kinase domain that signals to Ypd1p and Ssk1p, thereby forming a phosphorelay system similar to bacterial two-component regulators histidine kinase osmosensor that regulates an osmosensing MAP kinase cascade similar to bacterial two-component regulators Null mutant is inviable owing to the constitutive activation of the HOG1 MAPK cascade; mutations in any of the four downstream genes (SSK1, SSK2, PBS2, and HOG1) suppress sln1 lethality |
| 0392                    | GO_TERM:[glucose import] P-Value:4.6e-05 OVERLAP:[cytoplasmic ribosomal large subunit] <500.40.10> SIZE:81                                                                                                                                                                                                                                                                                                                                                                                                                                                                  |
| YGL253W                 | [HXK2] Hexokinase isoenzyme 2 that catalyzes phosphorylation of glucose in the cytosol; predominant hexokinase during growth on glucose; functions in the nucleus to repress expression of HXK1 and GLK1 and to induce expression of its own gene hexokinase II (PII) (also called hexokinase B) Null mutant is viable and can ferment fructose, but fails to show glucose repression at SUC2, CYC1, GAL10. hxk1, hxk2 double null mutant cannot ferment fructose                                                                                                           |
| YKL038W                 | [RGT1] Glucose-responsive transcription factor that regulates expression of several glucose transporter (HXT) genes in response to glucose; binds to promoters and acts both as a transcriptional activator and repressor transcriptional activator transcriptional repressor Null mutant is viable, shows constitutive expression of glucose-induced HXT genes                                                                                                                                                                                                             |
| <a href="#">YNL162W</a> | [RPL42A] Protein component of the large (60S) ribosomal subunit, identical to Rpl42Bp and has similarity to rat L44 ribosomal protein ribosomal protein L42A (YL27) (L41A)                                                                                                                                                                                                                                                                                                                                                                                                  |
| YOL097C                 | [WRS1] Cytoplasmic tryptophanyl-tRNA synthetase, aminoacylates tryptophanyl-tRNA tryptophan-tRNA ligase                                                                                                                                                                                                                                                                                                                                                                                                                                                                     |
| 0393                    | GO_TERM:[tRNA (guanine-N7-)-methyltransferase activity] P-Value:2.5e-06                                                                                                                                                                                                                                                                                                                                                                                                                                                                                                     |
| YDL201W                 | [TRM8] Subunit of a tRNA methyltransferase complex composed of Trm8p and Trm82p that catalyzes 7-methylguanosine modification of tRNA                                                                                                                                                                                                                                                                                                                                                                                                                                       |
| YDR165W                 | [TRM82] Subunit of a tRNA methyltransferase complex composed of Trm8p and Trm82p that catalyzes 7-methylguanosine modification of tRNA                                                                                                                                                                                                                                                                                                                                                                                                                                      |
| YEL077C                 |                                                                                                                                                                                                                                                                                                                                                                                                                                                                                                                                                                             |
| YFR053C                 | [HXK1] Hexokinase isoenzyme 1, a cytosolic protein that catalyzes phosphorylation of glucose during glucose metabolism; expression is highest during growth on non-glucose carbon sources; glucose-induced repression involves the hexokinase Hxk2p hexokinase I (PI) (also called hexokinase A) Null mutant is viable, is able to ferment fructose, and has little or no effect on glucose repression; hxk1, hxk2 double null mutant cannot ferment fructose and fails to show glucose repression at SUC2, CYC1, GAL10                                                     |
| 0394                    | GO_TERM:[biological_process] P-Value:9.2e-02                                                                                                                                                                                                                                                                                                                                                                                                                                                                                                                                |
| YGR130C                 |                                                                                                                                                                                                                                                                                                                                                                                                                                                                                                                                                                             |
| YGR177C                 | [ATF2] Alcohol acetyltransferase, may play a role in steroid detoxification; forms volatile esters during fermentation, which is important in brewing alcohol acetyltransferase                                                                                                                                                                                                                                                                                                                                                                                             |
| YKR018C                 |                                                                                                                                                                                                                                                                                                                                                                                                                                                                                                                                                                             |
| YNR029C                 |                                                                                                                                                                                                                                                                                                                                                                                                                                                                                                                                                                             |

|                |                                                                                                                                                                                                                                                                                                                                                                                                                                                                                                                                |
|----------------|--------------------------------------------------------------------------------------------------------------------------------------------------------------------------------------------------------------------------------------------------------------------------------------------------------------------------------------------------------------------------------------------------------------------------------------------------------------------------------------------------------------------------------|
| 0395           | GO_TERM:[biological_process] P-Value:3.0e-02                                                                                                                                                                                                                                                                                                                                                                                                                                                                                   |
| YLR211C        |                                                                                                                                                                                                                                                                                                                                                                                                                                                                                                                                |
| YKR074W        |                                                                                                                                                                                                                                                                                                                                                                                                                                                                                                                                |
| YLR446W        |                                                                                                                                                                                                                                                                                                                                                                                                                                                                                                                                |
| 0396           | GO_TERM:[molecular_function] P-Value:5.5e-01                                                                                                                                                                                                                                                                                                                                                                                                                                                                                   |
| YMR181C        |                                                                                                                                                                                                                                                                                                                                                                                                                                                                                                                                |
| YJL178C        | [ATG27] Type II membrane protein that binds phosphatidylinositol 3-phosphate, required for the cytoplasm-to-vacuole targeting (Cvt) pathway                                                                                                                                                                                                                                                                                                                                                                                    |
| YGL229C        | [SAP4] Protein required for function of the Sit4p protein phosphatase, member of a family of similar proteins that form complexes with Sit4p, including Sap155p, Sap185p, and Sap190p                                                                                                                                                                                                                                                                                                                                          |
| YOR062C        |                                                                                                                                                                                                                                                                                                                                                                                                                                                                                                                                |
| 0397           | GO_TERM:[nucleotide metabolism] P-Value:4.5e-02                                                                                                                                                                                                                                                                                                                                                                                                                                                                                |
| YMR178W        |                                                                                                                                                                                                                                                                                                                                                                                                                                                                                                                                |
| YGR248W        | [SOL4] 6-phosphogluconolactonase with similarity to Sol3p 6-phosphogluconolactonase                                                                                                                                                                                                                                                                                                                                                                                                                                            |
| YOR018W        | [ROD1] Membrane protein; overexpression confers resistance to the GST substrate o-dinitrobenzene as well as to zinc and calcium; contains 2 PY motifs, which are required for Rod1p interaction with Rsp5p, a hect-type ubiquitin ligase Null mutant is viable but is hypersensitive to o-dinitrobenzene, calcium, and zinc                                                                                                                                                                                                    |
| YDL125C        | [HNT1] Adenosine 5'-monophosphoramidase; interacts physically and genetically with Kin28p, a CDK and TFIK subunit, and genetically with CAK1; member of the histidine triad (HIT) superfamily of nucleotide-binding proteins and similar to Hint                                                                                                                                                                                                                                                                               |
| YCR073C        | [SSK22] MAP kinase kinase kinase of the HOG1 mitogen-activated signaling pathway; functionally redundant with, and homologous to, Ssk2p; interacts with and is activated by Ssk1p; phosphorylates Pbs2p                                                                                                                                                                                                                                                                                                                        |
| YDR524C        | [AGE1] ADP-ribosylation factor (ARF) GTPase activating protein (GAP) effector, involved in the secretory and endocytic pathways; contains C2C2H2 cysteine/histidine motif ARF GAP with effector function(s)                                                                                                                                                                                                                                                                                                                    |
| YOR066W        |                                                                                                                                                                                                                                                                                                                                                                                                                                                                                                                                |
| 0398           | GO_TERM:[cytoplasmic part] P-Value:5.3e-01                                                                                                                                                                                                                                                                                                                                                                                                                                                                                     |
| YIL134W        | [FLX1] Protein required for transport of flavin adenine dinucleotide (FAD) from mitochondria, where it is synthesized from riboflavin, to the cytosol FAD carrier protein                                                                                                                                                                                                                                                                                                                                                      |
| YDR532C        |                                                                                                                                                                                                                                                                                                                                                                                                                                                                                                                                |
| YKL194C        | [MST1] Mitochondrial threonyl-tRNA synthetase                                                                                                                                                                                                                                                                                                                                                                                                                                                                                  |
| 0399           | GO_TERM:[endodeoxyribonuclease activity, producing 5'-phosphomonoesters] P-Value:4.6e-05 OVERLAP:[cytoplasmic ribosomal small subunit] <500.40.20> SIZE:57                                                                                                                                                                                                                                                                                                                                                                     |
| YDL139C        | [SCM3] Protein of unknown function; isolated as a high-copy suppressor of mutations in the histone fold domain (HFD) of CSE4                                                                                                                                                                                                                                                                                                                                                                                                   |
| <b>YER074W</b> | [RPS24A] Protein component of the small (40S) ribosomal subunit; identical to Rps24Bp and has similarity to rat S24 ribosomal protein ribosomal protein S24A                                                                                                                                                                                                                                                                                                                                                                   |
| YHR154W        | [RTT107] Protein that interacts with Mms22p and is implicated in Mms22-dependent DNA repair during S phase, damage induces phosphorylation by Mec1p at one or more SQ/TQ motifs; has four BRCT domains; has a role in regulation of Ty1 transposition Null: increases transposition of Ty1                                                                                                                                                                                                                                     |
| YBR228W        | [SLX1] Subunit of a complex, with Slx4p, that hydrolyzes 5' branches from duplex DNA in response to stalled or converging replication forks; function overlaps with that of Sgs1p-Top3p                                                                                                                                                                                                                                                                                                                                        |
| YLR135W        | [SLX4] Subunit of a complex, with Slx1p, that hydrolyzes 5' branches from duplex DNA in response to stalled or converging replication forks; function overlaps with that of Sgs1p-Top3p                                                                                                                                                                                                                                                                                                                                        |
| 0400           | GO_TERM:[protein heterodimerization activity] P-Value:3.0e-06 OVERLAP:[other DNA repair complexes] <510.180.20> SIZE:5                                                                                                                                                                                                                                                                                                                                                                                                         |
| <b>YDR004W</b> | [RAD57] Protein that stimulates strand exchange by stabilizing the binding of Rad51p to single-stranded DNA; involved in the recombinational repair of double-strand breaks in DNA during vegetative growth and meiosis; forms heterodimer with Rad55p RecA homologinteracts with Rad 55p by two-hybrid analysis[similar to DMC1, RAD51, and RAD55 Null mutant is viable, radiation sensitive Deletion of this homologous recombination (HR) gene decreases psoralen-induced recombination and increases mutation frequencies. |

|                |                                                                                                                                                                                                                                                                                                                                                                                                                                                                                                                                                                                                                                                                                      |
|----------------|--------------------------------------------------------------------------------------------------------------------------------------------------------------------------------------------------------------------------------------------------------------------------------------------------------------------------------------------------------------------------------------------------------------------------------------------------------------------------------------------------------------------------------------------------------------------------------------------------------------------------------------------------------------------------------------|
| <b>YDR076W</b> | [RAD55] Protein that stimulates strand exchange by stabilizing the binding of Rad51p to single-stranded DNA; involved in the recombinational repair of double-strand breaks in DNA during vegetative growth and meiosis; forms heterodimer with Rad57p RecA homolog interacts with Rad51p and Rad57p by two-hybrid analysis similar to DMC1, RAD51, RAD57 Null mutant is viable, radiation sensitive, x-ray sensitive Deletion of this homologous recombination (HR) gene decreases psoralen-induced recombination and increases mutation frequencies.                                                                                                                               |
| 0401           | GO_TERM:[lateral element] P-Value:8.5e-07 OVERLAP:[Synaptonemal complex (SC)] <490> SIZE:5                                                                                                                                                                                                                                                                                                                                                                                                                                                                                                                                                                                           |
| <b>YIL072W</b> | [HOP1] Meiosis-specific DNA binding protein that displays Red1p dependent localization to the unsynapsed axial-lateral elements of the synaptonemal complex; required for homologous chromosome synapsis and chiasma formation DNA binding protein decreased levels of meiotic crossing over and intragenic recombination between markers on homologous chromosomes                                                                                                                                                                                                                                                                                                                  |
| <b>YLR263W</b> | [RED1] Protein component of the axial elements of the synaptonemal complex, involved in chromosome segregation during the first meiotic division; interacts with Hop1p; required for wild-type levels of Mek1p kinase activity meiosis-specific component of synaptonemal complex axial element protein core                                                                                                                                                                                                                                                                                                                                                                         |
| 0402           | GO_TERM:[meiosis I] P-Value:7.1e-09 OVERLAP:[Synaptonemal complex (SC)] <490> SIZE:5                                                                                                                                                                                                                                                                                                                                                                                                                                                                                                                                                                                                 |
| YEL069C        | [HXT13] Protein of unknown function with similarity to hexose transporter family members, expression is induced by low levels of glucose and repressed by high levels of glucose high affinity hexose transporter                                                                                                                                                                                                                                                                                                                                                                                                                                                                    |
| <b>YGL249W</b> | [ZIP2] Meiosis-specific protein involved in normal synaptonemal complex formation and pairing between homologous chromosomes during meiosis Null mutant is viable but is defective in chromosome synapsis, but not chromosome pairing, and causes meiosis I non-disjunction and reduced homologous recombination                                                                                                                                                                                                                                                                                                                                                                     |
| <b>YDR285W</b> | [ZIP1] Transverse filament protein of the synaptonemal complex; required for normal levels of meiotic recombination and pairing between homologous chromosome during meiosis; potential Cdc28p substrate Null mutant is viable and shows defects in meiosis                                                                                                                                                                                                                                                                                                                                                                                                                          |
| YDL154W        | [MSH5] Protein of the MutS family, forms a dimer with Msh4p that facilitates crossovers between homologs during meiosis; msh5-Y823H mutation confers tolerance to DNA alkylating agents; homologs present in C. elegans and humans mutS homolog Null mutant is viable. Diploids lacking the MSH5 gene display decreased levels of spore viability, increased levels of meiosis I chromosome nondisjunction, and decreased levels of reciprocal exchange between, but not within, homologs. Gene conversion is not reduced. Msh5 mutants are phenotypically similar to mutants in the meiosis-specific gene MSH4. msh5 is epistatic to msh4, suggesting they act in the same pathway. |
| YFL003C        | [MSH4] Protein involved in meiotic recombination, required for normal levels of crossing over, colocalizes with Zip2p to discrete foci on meiotic chromosomes, has homology to bacterial MutS protein meiosis specific protein, E.coli MutS protein, localizes to discrete sites on meiotic chromosomes Null mutant is viable, has no apparent defect in mismatch repair, wild-type levels of gene conversion and postmeiotic segregation                                                                                                                                                                                                                                            |
| YLR394W        | [CST9] Protein required for synaptonemal complex formation, may have a role in meiotic recombination; localizes to synapsis initiation sites on meiotic chromosomes; potential Cdc28p substrate Null mutant is viable, but exhibits delayed sporulation and reduced viability; overexpression of CSTs induces chromosome loss                                                                                                                                                                                                                                                                                                                                                        |
| 0403           | GO_TERM:[mitochondrion] P-Value:2.4e-01                                                                                                                                                                                                                                                                                                                                                                                                                                                                                                                                                                                                                                              |
| YGR155W        | [CYS4] Cystathionine beta-synthase, catalyzes the synthesis of cystathionine from serine and homocysteine, the first committed step in cysteine biosynthesis cystathionine beta-synthase Null exhibits vacuolar acidification defects; cys2 and cys4 mutations are linked together and cooperatively confer cysteine dependence.                                                                                                                                                                                                                                                                                                                                                     |
| YML076C        | [WAR1] Homodimeric Zn2Cys6 zinc finger transcription factor; binds to a weak acid response element to induce transcription of PDR12 and FUN34, encoding an acid transporter and a putative ammonia transporter, respectively                                                                                                                                                                                                                                                                                                                                                                                                                                                         |
| 0404           | GO_TERM:[cellular biosynthesis] P-Value:6.2e-02                                                                                                                                                                                                                                                                                                                                                                                                                                                                                                                                                                                                                                      |
| YEL046C        | [GLY1] Threonine aldolase, catalyzes the cleavage of L-allo-threonine and L-threonine to glycine; involved in glycine biosynthesis threonine aldolase Null mutant is viable, glycine auxotroph, gly1 null mutants are not glycine auxotrophs on ethanol media                                                                                                                                                                                                                                                                                                                                                                                                                        |
| YDR542W        | [YDR542W] Hypothetical protein                                                                                                                                                                                                                                                                                                                                                                                                                                                                                                                                                                                                                                                       |
| YNL220W        | [ADE12] Adenylosuccinate synthase, catalyzes the first committed step in the 'de novo' biosynthesis of adenosine adenylosuccinate synthetase Adenine requiring                                                                                                                                                                                                                                                                                                                                                                                                                                                                                                                       |
| YOR187W        | [TUF1] Mitochondrial translation elongation factor Tu; comprises both GTPase and guanine nucleotide exchange factor activities, while these activities are found in separate proteins in S. pombe and humans translation elongation factor Tu, mitochondrial Null mutant is viable, blocks mitochondrial translation and destabilizes mitochondrial genome.                                                                                                                                                                                                                                                                                                                          |
| 0405           | GO_TERM:[cytoplasmic microtubule] P-Value:1.4e-04                                                                                                                                                                                                                                                                                                                                                                                                                                                                                                                                                                                                                                    |
| YKL127W        | [PGM1] Phosphoglucomutase, minor isoform; catalyzes the conversion from glucose-1-phosphate to glucose-6-phosphate, which is a key step in hexose metabolism phosphoglucomutase minor isoform                                                                                                                                                                                                                                                                                                                                                                                                                                                                                        |
| YLR254C        | [NDL1] homolog of nuclear distribution factor NudE, NUDEL                                                                                                                                                                                                                                                                                                                                                                                                                                                                                                                                                                                                                            |
| YOR269W        | [PAC1] Protein involved in nuclear migration, part of the dynein/dynactin pathway; targets dynein to microtubule tips, which is necessary for sliding of microtubules along bud cortex; synthetic lethal with bni1; homolog of human LIS1                                                                                                                                                                                                                                                                                                                                                                                                                                            |
| 0406           | GO_TERM:[sulfur amino acid metabolism] P-Value:5.1e-08 OVERLAP:[Met4/Met28/Met31 complex] <510.190.160.20> SIZE:3                                                                                                                                                                                                                                                                                                                                                                                                                                                                                                                                                                    |

|                  |                                                                                                                                                                                                                                                                                                                                                                                                  |
|------------------|--------------------------------------------------------------------------------------------------------------------------------------------------------------------------------------------------------------------------------------------------------------------------------------------------------------------------------------------------------------------------------------------------|
| <b>YIR017C</b>   | [MET28] Transcriptional activator in the Cbf1p-Met4p-Met28p complex, participates in the regulation of sulfur metabolism transcriptional activator in the Cbf1p-Met4p-Met28p complex Null mutant is viable but is a methionine-auxotroph and resistant to toxic analogs of sulfate.                                                                                                              |
| YLR437C          |                                                                                                                                                                                                                                                                                                                                                                                                  |
| YDR253C          | [MET32] Zinc-finger DNA-binding protein, involved in regulating expression of the methionine biosynthetic genes, similar to Met31p highly homologous to Met31p transcriptional regulator of sulfur amino acid metabolism zinc finger protein                                                                                                                                                     |
| <b>YNL103W</b>   | [MET4] Lecine-zipper transcriptional activator, responsible for the regulation of the sulfur amino acid pathway, requires different combinations of the auxiliary factors Cbf1p, Met28p, Met31p and Met32p leucine zipper family transcriptional activator                                                                                                                                       |
| <b>YPL038W</b>   | [MET31] Zinc-finger DNA-binding protein, involved in regulating expression of the methionine biosynthetic genes, similar to Met32p highly homologous to Met32p transcriptional regulator of sulfur amino acid metabolism zinc finger protein                                                                                                                                                     |
| 0407             | GO_TERM:[proton-transporting ATP synthase complex (sensu Eukaryota)] P-Value:2.3e-04 OVERLAP:[F0/F1 ATP synthase (complex V)] <420.50> SIZE:18                                                                                                                                                                                                                                                   |
| YDL130W-A        | [STF1] Protein involved in regulation of the mitochondrial F1F0-ATP synthase; Stf1p and Stf2p act as stabilizing factors that enhance inhibitory action of the Inh1p protein                                                                                                                                                                                                                     |
| <b>YDL181W</b>   | [INH1] Protein that inhibits ATP hydrolysis by the F1F0-ATP synthase, inhibitory function is enhanced by stabilizing proteins Stf1p and Stf2p; has similarity to Stf1p and both Inh1p and Stf1p exhibit the potential to form coiled-coil structures ATPase inhibitor Null mutant is viable; exhibits marked ATP hydrolysis in response to the uncoupler carbonylcyanide-m-chlorophenylhydrazone |
| 0408             | GO_TERM:[pseudohyphal growth] P-Value:3.4e-03                                                                                                                                                                                                                                                                                                                                                    |
| YLR336C          | [SGD1] Essential nuclear protein with a possible role in the osmoregulatory glycerol response; interacts with phospholipase C (Plc1p); putative homolog of human NOM1 which is implicated in acute myeloid leukemia Null mutant is inviable; multi-copy suppressor of hog1 and pbs2 osmosensitive phenotypes                                                                                     |
| YDL035C          | [GPR1] Plasma membrane G protein coupled receptor (GPCR) that interacts with the heterotrimeric G protein alpha subunit, Gpa2p, and with Plc1p; sensor that integrates nutritional signals with the modulation of cell fate via PKA and cAMP synthesis G protein coupled receptor (GPCR)                                                                                                         |
| YPL268W          | [PLC1] Phosphoinositide-specific phospholipase C, hydrolyzes phosphatidylinositol 4,5-biphosphate (PIP2) to generate inositol 1,4,5-triphosphate (IP3) and 1,2-diacylglycerol (DAG); involved in kinetochore function and pseudohyphal differentiation phosphoinositide-specific phospholipase C                                                                                                 |
| 0409             | GO_TERM:[DASH complex] P-Value:4.3e-28 OVERLAP:[Dam1 protein complex] <270.20.30> SIZE:9                                                                                                                                                                                                                                                                                                         |
| YKL179C          | [COY1] Golgi membrane protein with similarity to mammalian CASP; genetic interactions with GOS1 (encoding a Golgi snare protein) suggest a role in Golgi function                                                                                                                                                                                                                                |
| YOR304C-A        |                                                                                                                                                                                                                                                                                                                                                                                                  |
| YPR155C          | [NCA2] Protein involved in regulation of mitochondrial expression of subunits 6 (Atp6p) and 8 (Atp8p) of the Fo-F1 ATP synthase; functions with Nca3p                                                                                                                                                                                                                                            |
| YGL067W          | [NPY1] NADH diphosphatase (pyrophosphatase), hydrolyzes the pyrophosphate linkage in NADH and related nucleotides; localizes to peroxisomes NADH pyrophosphatase 1 No readily detected phenotype                                                                                                                                                                                                 |
| <b>YBR233W-A</b> | [DAD3] Essential subunit of the DASH microtubule ring complex, couples kinetochores to the force produced by MT depolymerization thereby aiding in chromosome segregation; is transferred to the kinetochore prior to mitosis                                                                                                                                                                    |
| <b>YKR083C</b>   | [DAD2] Essential subunit of the DASH microtubule ring complex, couples kinetochores to the force produced by MT depolymerization thereby aiding in chromosome segregation; is transferred to the kinetochore prior to mitosis                                                                                                                                                                    |
| <b>YGR113W</b>   | [DAM1] Essential subunit of the DASH microtubule ring complex, couples kinetochores to the force produced by MT depolymerization thereby aiding in chromosome segregation; Ipl1p target for regulating kinetochore-MT attachments                                                                                                                                                                |
| <b>YGL061C</b>   | [DUO1] Essential subunit of the DASH microtubule ring complex, couples kinetochores to the force produced by MT depolymerization thereby aiding in chromosome segregation; is transferred to the kinetochore prior to mitosis Null mutant is inviable; overexpression arrests cells at large budded stage                                                                                        |
| <b>YDR201W</b>   | [SPC19] Essential subunit of the DASH microtubule ring complex, couples kinetochores to the force produced by MT depolymerization thereby aiding in chromosome segregation; also localized to nuclear side of spindle pole body spindle pole component                                                                                                                                           |
| <b>YKR037C</b>   | [SPC34] Essential subunit of the DASH microtubule ring complex, couples kinetochores to the force produced by MT depolymerization thereby aiding in chromosome segregation; also localized to nuclear side of spindle pole body spindle pole component                                                                                                                                           |
| <b>YDR016C</b>   | [DAD1] Essential subunit of the DASH microtubule ring complex, couples kinetochores to the force produced by MT depolymerization thereby aiding in chromosome segregation; is transferred to the kinetochore prior to mitosis Null mutant is inviable; temperature-sensitive mutant arrests with large buds and a short mitotic spindle                                                          |
| <b>YKL052C</b>   | [ASK1] Essential subunit of the DASH microtubule ring complex, couples kinetochores to the force produced by MT depolymerization thereby aiding in chromosome segregation; phosphorylated during the cell cycle by cyclin-dependent kinases                                                                                                                                                      |
| <b>YDR320C-A</b> | [DAD4] Essential subunit of the DASH microtubule ring complex, couples kinetochores to the force produced by MT depolymerization thereby aiding in chromosome segregation; is transferred to the kinetochore prior to mitosis                                                                                                                                                                    |
| YKL138C-A        | [HSK3] Essential subunit of the DASH microtubule ring complex, couples kinetochores to the force produced by MT depolymerization thereby aiding in chromosome segregation; is transferred to the kinetochore prior to mitosis                                                                                                                                                                    |
| 0410             | GO_TERM:[nuclear cohesin complex] P-Value:2.5e-17 OVERLAP:[Sister chromatid cohesion complex] <475.05> SIZE:6                                                                                                                                                                                                                                                                                    |

|                |                                                                                                                                                                                                                                                                                                                                                                                                                                                                                                                                                                                                                                                                                                                                                                    |
|----------------|--------------------------------------------------------------------------------------------------------------------------------------------------------------------------------------------------------------------------------------------------------------------------------------------------------------------------------------------------------------------------------------------------------------------------------------------------------------------------------------------------------------------------------------------------------------------------------------------------------------------------------------------------------------------------------------------------------------------------------------------------------------------|
| YPL055C        | [LGE1] Protein of unknown function; null mutant forms abnormally large cells Null: large cell size. Other phenotypes: synthetic lethal with swi4                                                                                                                                                                                                                                                                                                                                                                                                                                                                                                                                                                                                                   |
| YEL043W        |                                                                                                                                                                                                                                                                                                                                                                                                                                                                                                                                                                                                                                                                                                                                                                    |
| YDL074C        | [BRE1] E3 ubiquitin ligase for Rad6p, required for the ubiquitination of histone H2B, recruitment of Rad6p to promoter chromatin and subsequent methylation of histone H3 (on L4 and L79), contains RING finger domain null mutant is sensitive to brefeldin A                                                                                                                                                                                                                                                                                                                                                                                                                                                                                                     |
| YOR365C        |                                                                                                                                                                                                                                                                                                                                                                                                                                                                                                                                                                                                                                                                                                                                                                    |
| <b>YPR007C</b> | [REC8] Meiosis-specific component of sister chromatid cohesion complex; maintains cohesion between sister chromatids during meiosis I; maintains cohesion between centromeres of sister chromatids until meiosis II; homolog of <i>S. pombe</i> Rec8p Null mutant is viable, does not undergo meiotic division and is unable to sporulate. The null mutant also exhibits a loss of sister chromatid cohesion, an absence of the synaptonemal complex, and chaotic chromosome segregation.                                                                                                                                                                                                                                                                          |
| <b>YDR180W</b> | [SCC2] Subunit of cohesin loading factor (Sec2p-Scc4p), a complex required for the loading of cohesin complexes onto chromosomes; involved in establishing sister chromatid cohesion during DSB repair via histone H2AX                                                                                                                                                                                                                                                                                                                                                                                                                                                                                                                                            |
| <b>YDL003W</b> | [MCD1] Essential protein required for sister chromatid cohesion in mitosis and meiosis; subunit of the cohesin complex; expression is cell cycle regulated and peaks in S phase Null mutant is inviable; temperature sensitive mutants are defective in mitotic sister chromatid cohesion and mitotic chromosome condensation; multicopy suppressor of smc1-2 mutation                                                                                                                                                                                                                                                                                                                                                                                             |
| <b>YJL074C</b> | [SMC3] Subunit of the multiprotein cohesin complex required for sister chromatid cohesion in mitotic cells; also required, with Rec8p, for cohesion and recombination during meiosis; phylogenetically conserved SMC chromosomal ATPase family member SMC chromosomal ATPase family member                                                                                                                                                                                                                                                                                                                                                                                                                                                                         |
| <b>YFL008W</b> | [SMC1] Subunit of the multiprotein cohesin complex, essential protein involved in chromosome segregation and in double-strand DNA break repair; SMC chromosomal ATPase family member, binds DNA with a preference for DNA with secondary structure SMC chromosomal ATPase family member null is inviable; other mutants show chromosome loss and defects in nuclear division                                                                                                                                                                                                                                                                                                                                                                                       |
| <b>YIL026C</b> | [IRR1] Subunit of the cohesin complex, which is required for sister chromatid cohesion during mitosis and meiosis and interacts with centromeres and chromosome arms, essential for viability cohesin complex subunit Null mutant is inviable; decreased transcription of mutant causes irregularity of zygotes, colonies, decreased adhesion to solid supports                                                                                                                                                                                                                                                                                                                                                                                                    |
| 0411           | GO_TERM:[histone deacetylase activity] P-Value:9.3e-07                                                                                                                                                                                                                                                                                                                                                                                                                                                                                                                                                                                                                                                                                                             |
| YKL134C        | [OCT1] Mitochondrial intermediate peptidase, cleaves N-terminal residues of a subset of proteins upon import, after their cleavage by mitochondrial processing peptidase (Mas1p-Mas2p); may contribute to mitochondrial iron homeostasis intermediate peptidase possesses octapeptidyl amino-peptidase activity Null mutant is viable, unable to grow on nonfermentable substrates                                                                                                                                                                                                                                                                                                                                                                                 |
| YDR150W        | [NUM1] Protein required for nuclear migration, localizes to the mother cell cortex and the bud tip; may mediate interactions of dynein and cytoplasmic microtubules with the cell cortex Null mutant is viable; num1-disrupted strains contain many budded cells with two nuclei in mother cell, and haploid num1 strains tend to diploidize during mitosis                                                                                                                                                                                                                                                                                                                                                                                                        |
| YNL021W        | [HDA1] Putative catalytic subunit of a class II histone deacetylase complex that also contains Hda2p and Hda3p; Hda1p interacts with the Hda2p-Hda3p subcomplex to form an active tetramer; deletion increases histone H2B, H3 and H4 acetylation histone deacetylase shares sequence similarity with Rpd3p, Hos1p, Hos2p, and Hos3p                                                                                                                                                                                                                                                                                                                                                                                                                               |
| YDR295C        | [HDA2] Subunit of a possibly tetrameric trichostatin A-sensitive class II histone deacetylase complex containing an Hda1p homodimer and an Hda2p-Hda3p heterodimer; involved in telomere maintenance                                                                                                                                                                                                                                                                                                                                                                                                                                                                                                                                                               |
| YPR179C        | [HDA3] Subunit of a possibly tetrameric trichostatin A-sensitive class II histone deacetylase complex that contains an Hda1p homodimer and an Hda2p-Hda3p heterodimer; required for the activity of the complex; has similarity to Hda2p                                                                                                                                                                                                                                                                                                                                                                                                                                                                                                                           |
| 0412           | OVERLAP:[Kinesin-related motorproteins] <140.30.30.10> SIZE:8                                                                                                                                                                                                                                                                                                                                                                                                                                                                                                                                                                                                                                                                                                      |
| YMR003W        |                                                                                                                                                                                                                                                                                                                                                                                                                                                                                                                                                                                                                                                                                                                                                                    |
| <b>YPR141C</b> | [KAR3] Minus-end-directed microtubule motor that functions in mitosis and meiosis, localizes to the spindle pole body and localization is dependent on functional Cik1p, required for nuclear fusion during mating; potential Cdc28p substrate kinesin-like nuclear fusion protein Null mutant is viable. Mutations in KAR3 are semidominant and cause pleiotropic effects affecting both mitosis and meiosis. kar3 mutations prevent karyogamy (nuclear fusion).                                                                                                                                                                                                                                                                                                  |
| 0413           | GO_TERM:[centromeric DNA binding] P-Value:9.4e-12 OVERLAP:[CBF3 protein complex] <270.10.10> SIZE:4                                                                                                                                                                                                                                                                                                                                                                                                                                                                                                                                                                                                                                                                |
| YLL052C        | [AQY2] Water channel that mediates the transport of water across cell membranes, only expressed in proliferating cells, controlled by osmotic signals, may be involved in freeze tolerance; disrupted by a stop codon in many <i>S. cerevisiae</i> strains MIP family member aquaporin (putative)                                                                                                                                                                                                                                                                                                                                                                                                                                                                  |
| YJR060W        | [CBF1] Helix-loop-helix protein that binds the motif CACRTG, which is present at several sites including MET gene promoters and centromere DNA element I (CDEI); required for nucleosome positioning at this motif; targets Isw1p to DNA basic helix-loop-helix protein Null mutant is viable, but grows slowly and causes partial loss of centromere function (increased chromosome loss), benomyl and thiabendazole sensitivity, methionine auxotrophy, and changes in chromatin structure at CENs and some promoters. Null mutation causes precocious sister segregation at MI, and reduced spore viability.                                                                                                                                                    |
| <b>YMR094W</b> | [CTF13] Subunit of the CBF3 complex, which binds to the CDE III element of centromeres, bending the DNA upon binding, and may be involved in sister chromatid cohesion during mitosis                                                                                                                                                                                                                                                                                                                                                                                                                                                                                                                                                                              |
| <b>YGR140W</b> | [CBF2] Essential kinetochore protein, component of the CBF3 multisubunit complex that binds to the CDEIII region of the centromere; Cbf2p also binds to the CDEII region possibly forming a different multimeric complex, ubiquitinated in vivo centromere binding factor CBF3 110 kDa subunit                                                                                                                                                                                                                                                                                                                                                                                                                                                                     |
| <b>YMR168C</b> | [CEP3] Essential kinetochore protein, component of the CBF3 complex that binds the CDEIII region of the centromere; contains an N-terminal Zn2Cys6 type zinc finger domain, a C-terminal acidic domain, and a putative coiled coil dimerization domain Cbf3 kinetochore protein complex subunit b Null mutant is inviable; mutations within the zinc finger domain result in cells that exhibit a G2-M cell cycle delay and increased chromosome loss in each mitotic cell division; at nonpermissive temperature the cep3 cells arrest with an undivided nucleus and a short mitotic spindle; at permissive temperature cep3 cells are unable to support segregation of minichromosomes with mutations in the central part of element III of yeast centromere DNA |

|           |                                                                                                                                                                                                                                                                                                                                                                                                                                                                                                                                          |
|-----------|------------------------------------------------------------------------------------------------------------------------------------------------------------------------------------------------------------------------------------------------------------------------------------------------------------------------------------------------------------------------------------------------------------------------------------------------------------------------------------------------------------------------------------------|
| 0414      | GO_TERM:[kinetochore] P-Value:2.5e-44 OVERLAP:[Ndc80 protein complex] <270.20.40> SIZE:4                                                                                                                                                                                                                                                                                                                                                                                                                                                 |
| YMR117C   | [SPC24] Component of the evolutionarily conserved kinetochore-associated Ndc80 complex (Ndc80p-Nuf2p-Spc24p-Spc25p); involved in chromosome segregation, spindle checkpoint activity and kinetochore clustering spindle pole component                                                                                                                                                                                                                                                                                                   |
| YIL144W   | [TID3] Component of the evolutionarily conserved kinetochore-associated Ndc80 complex (Ndc80p-Nuf2p-Spc24p-Spc25p); conserved coiled-coil protein involved in chromosome segregation, spindle checkpoint activity, kinetochore assembly and clustering                                                                                                                                                                                                                                                                                   |
| YER018C   | [SPC25] Component of the evolutionarily conserved kinetochore-associated Ndc80 complex (Ndc80p-Nuf2p-Spc24p-Spc25p); involved in chromosome segregation, spindle checkpoint activity and kinetochore clustering spindle pole component                                                                                                                                                                                                                                                                                                   |
| YOL069W   | [NUF2] Component of the evolutionarily conserved kinetochore-associated Ndc80 complex (Ndc80p-Nuf2p-Spc24p-Spc25p); involved in chromosome segregation, spindle checkpoint activity and kinetochore clustering Null mutant is inviable; temperature-sensitive mutants arrest with single undivided or partially divided nucleus in the bud neck, shortened mitotic spindle, and fully replicated DNA                                                                                                                                     |
| YGL093W   | [SPC105] Protein required for accurate chromosome segregation, localizes to the nuclear side of the spindle pole body; forms a complex with Ydr532cp spindle pole component                                                                                                                                                                                                                                                                                                                                                              |
| YJR112W   | [NNF1] Essential component of the MIND kinetochore complex (Mtw1p Including Nnf1p-Nsl1p-Dsn1p) which joins kinetochore subunits contacting DNA to those contacting microtubules; required for accurate chromosome segregation Null mutant is inviable; cells depleted of Nnf1p or containing a temperature-sensitive nnf1 mutation have elongated microtubules and become bi- and multinucleate                                                                                                                                          |
| YKL089W   | [MIF2] Kinetochore protein with homology to human CENP-C, required for structural integrity of the spindle during anaphase spindle elongation, interacts with histones H2A, H2B, and H4, phosphorylated by Ipl1p Null mutant is inviable, temperature sensitive mutants accumulate large budded cells and broken spindles at the restrictive temperature                                                                                                                                                                                 |
| YAL034W-A | [MTW1] Essential component of the MIND kinetochore complex (Mtw1p Including Nnf1p-Nsl1p-Dsn1p) which joins kinetochore subunits contacting DNA to those contacting microtubules; critical to kinetochore assembly Null mutant is inviable. ts mtw1 mutant exhibits longer metaphase spindles and unequal sister chromatid segregation                                                                                                                                                                                                    |
| YDR383C   | [NKP1] Non-essential kinetochore protein, subunit of the Ctf19 central kinetochore complex (Ctf19p-Mcm21p-Okp1p-Mcm22p-Mcm16p-Ctf3p-Chl4p-Mcm19p-Nkp1p-Nkp2p-Ame1p-Mtw1p)                                                                                                                                                                                                                                                                                                                                                                |
| YDR318W   | [MCM21] Protein involved in minichromosome maintenance; component of the COMA complex (Ctf19p, Okp1p, Mcm21p, Ame1p) that bridges kinetochore subunits that are in contact with centromeric DNA and the subunits bound to microtubules Null mutant is viable but exhibits defects in the stability of minichromosomes. Mutants also exhibit elevated rates of chromosome loss (but not those of recombination) and are hypersensitive to the anti-mitotic drug benomyl.                                                                  |
| YLR315W   | [NKP2] Non-essential kinetochore protein, subunit of the Ctf19 central kinetochore complex (Ctf19p-Mcm21p-Okp1p-Mcm22p-Mcm16p-Ctf3p-Chl4p-Mcm19p-Nkp1p-Nkp2p-Ame1p-Mtw1p)                                                                                                                                                                                                                                                                                                                                                                |
| YPR046W   | [MCM16] Protein involved in kinetochore-microtubule mediated chromosome segregation; binds to centromere DNA Null mutant is viable, exhibits increased sensitivity to the anitmitotic drugs benomyl and thiabendazole; exhibits a high rate of chromosome III loss without a significant increase in recombination frequency, may exhibit altered kinetochore assembly                                                                                                                                                                   |
| YLR381W   | [CTF3] Outer kinetochore protein that forms a complex with Mcm16p and Mcm22p; may bind the kinetochore to spindle microtubules                                                                                                                                                                                                                                                                                                                                                                                                           |
| YBR107C   | [IML3] Protein with a role in kinetochore function, localizes to the outer kinetochore in a Ctf19p-dependent manner, interacts with Chl4p and Ctf19p Null mutant is viable, but exhibits chromosome loss and abnormal chromosomal segregation                                                                                                                                                                                                                                                                                            |
| YPL233W   | [NSL1] Essential component of the MIND kinetochore complex (Mtw1p Including Nnf1p-Nsl1p-Dsn1p) which joins kinetochore subunits contacting DNA to those contacting microtubules; required for accurate chromosome segregation Protein required for cell viability                                                                                                                                                                                                                                                                        |
| YKL049C   | [CSE4] Centromere protein that resembles histones, required for proper kinetochore function; homolog of human CENP-A similar to histone H3 and to human centromere protein CENP-A Null mutant is inviable; cse4-1 mutant causes increased non-disjunction of chromosome with mutated CEN and t.s. arrest at G2/M boundary with 2N DNA content                                                                                                                                                                                            |
| YIR010W   | [DSN1] Essential component of the MIND kinetochore complex (Mtw1p Including Nnf1p-Nsl1p-Dsn1p) which joins kinetochore subunits contacting DNA to those contacting microtubules; important for chromosome segregation Protein required for cell viability                                                                                                                                                                                                                                                                                |
| YDR254W   | [CHL4] Outer kinetochore protein required for chromosome stability, interacts with kinetochore proteins Ctf19p, Ctf3p, and Iml3p; exhibits a two-hybrid interaction with Mif2p; association with CEN DNA requires Ctf19p Null mutant is viable. Some authors report a temperature-sensitive deletion allele, while others find no temperature sensitivity in another deletion allele. Fidelity of chromosome transmission and minichromosome nondisjunction in mitosis is decreased at all temperatures.                                 |
| YBR211C   | [AME1] Essential kinetochore protein associated with microtubules and spindle pole bodies; component of the kinetochore sub-complex COMA (Ctf19p, Okp1p, Mcm21p, Ame1p); involved in spindle checkpoint maintenance microtubule stability regulator Null: Null mutant is inviable; localizes to microtubules and SPB region, ame1-1 arrests in G2/M, mutant rescues benomyl sensitivity of TUB4/ tub4 heterozygote, ame1-4 mutant allele and heterozygous mutant confer benomyl resistance, interacts with APC lid protein by two-hybrid |
| YJR135C   | [MCM22] Protein involved in minichromosome maintenance; component of the kinetochore; binds to centromeric DNA in a Ctf19p-dependent manner                                                                                                                                                                                                                                                                                                                                                                                              |
| YGR179C   | [OKP1] Outer kinetochore protein, required for accurate mitotic chromosome segregation; component of the kinetochore sub-complex COMA (Ctf19p, Okp1p, Mcm21p, Ame1p) that functions as a platform for kinetochore assembly                                                                                                                                                                                                                                                                                                               |
| YPL018W   | [CTF19] Outer kinetochore protein, required for accurate mitotic chromosome segregation; component of the kinetochore sub-complex COMA (Ctf19p, Okp1p, Mcm21p, Ame1p) that functions as a platform for kinetochore assembly kinetochore protein                                                                                                                                                                                                                                                                                          |
| 0415      | GO_TERM:[molecular_function] P-Value:7.1e-02                                                                                                                                                                                                                                                                                                                                                                                                                                                                                             |
| YPL032C   | [SVL3] Protein of unknown function, mutant phenotype suggests a potential role in vacuolar function; green fluorescent protein (GFP)-fusion protein localizes to the cell periphery, cytoplasm, bud, and bud neck the svl3 mutant has large vacuoles and exhibits a temperature sensitive vacuolar staining defect                                                                                                                                                                                                                       |
| YDR366C   |                                                                                                                                                                                                                                                                                                                                                                                                                                                                                                                                          |

|                         |                                                                                                                                                                                                                                                                                                                                                                                                                                                                                                                                                                                                                                |
|-------------------------|--------------------------------------------------------------------------------------------------------------------------------------------------------------------------------------------------------------------------------------------------------------------------------------------------------------------------------------------------------------------------------------------------------------------------------------------------------------------------------------------------------------------------------------------------------------------------------------------------------------------------------|
| YER071C                 |                                                                                                                                                                                                                                                                                                                                                                                                                                                                                                                                                                                                                                |
| 0416                    | GO_TERM:[biological_process] P-Value:9.6e-02                                                                                                                                                                                                                                                                                                                                                                                                                                                                                                                                                                                   |
| YKL215C                 |                                                                                                                                                                                                                                                                                                                                                                                                                                                                                                                                                                                                                                |
| YPL199C                 |                                                                                                                                                                                                                                                                                                                                                                                                                                                                                                                                                                                                                                |
| 0417                    | GO_TERM:[transposition, RNA-mediated] P-Value:8.6e-04                                                                                                                                                                                                                                                                                                                                                                                                                                                                                                                                                                          |
| YJL113W                 |                                                                                                                                                                                                                                                                                                                                                                                                                                                                                                                                                                                                                                |
| YJL114W                 |                                                                                                                                                                                                                                                                                                                                                                                                                                                                                                                                                                                                                                |
| 0418                    | GO_TERM:[prefoldin complex] P-Value:6.9e-17 OVERLAP:[Gim complexes] <177> SIZE:5                                                                                                                                                                                                                                                                                                                                                                                                                                                                                                                                               |
| YAL047C                 | [SPC72] Component of the cytoplasmic Tub4p (gamma-tubulin) complex, binds spindle pole bodies and links them to microtubules; has roles in astral microtubule formation and stabilization Null mutant is inviable. Cells lacking Spc72 can only generate very short (<1 micron) and unstable astral microtubules. Consequently, nuclear migration to the bud neck and orientation of the anaphase spindle along the mother-bud axis are absent in these cells.                                                                                                                                                                 |
| YLR212C                 | [TUB4] Gamma-tubulin, involved in nucleating microtubules from both the cytoplasmic and nuclear faces of the spindle pole body gamma tubulin Null mutant is inviable. Tub4p-depleted cells arrest during nuclear division; most arrested cells contain a large bud, replicated DNA, and a single nucleus. Immunofluorescence and nuclear staining experiments indicate that cells depleted of Tub4p contain defects in the organization of both cytoplasmic and nuclear microtubule arrays; such cells exhibit nuclear migration failure, defects in spindle formation, and/or aberrantly long cytoplasmic microtubule arrays. |
| YNL188W                 | [KAR1] Essential protein involved in karyogamy during mating and in spindle pole body duplication during mitosis, localizes to the half-bridge of the spindle pole body, interacts with Spc72p during karyogamy, also interacts with Cdc31p Null mutant is inviable, kar1 mutants are karyogamy defective; defects in KAR1 block spindle pole body duplication; the temperature sensitivity of a kar1 mutant defective for localization to the spindle pole body can be suppressed by CDC31 overexpression or by dominant-acting CDC31 alleles                                                                                 |
| YHR172W                 | [SPC97] Component of the microtubule-nucleating Tub4p (gamma-tubulin) complex; interacts with Spc110p at the spindle pole body (SPB) inner plaque and with Spc72p at the SPB outer plaque gamma-tubulin complex component Null mutant is inviable; required for microtubule organization and spindle pole body duplication                                                                                                                                                                                                                                                                                                     |
| YNL126W                 | [SPC98] Component of the microtubule-nucleating Tub4p (gamma-tubulin) complex; interacts with Spc110p at the spindle pole body (SPB) inner plaque and with Spc72p at the SPB outer plaque gamma-tubulin complex component Null mutant is inviable; overexpression is toxic resulting in accumulation of cells with large buds, 2N DNA content, defect in microtubule structure. ts-phenotype: arrest in G2 of cell cycle with large bud, duplicated spindle pole bodies, short spindle and elongated cytoplasmic microtubules                                                                                                  |
| <a href="#">YLR200W</a> | [YKE2] Subunit of the heterohexameric Gim/prefoldin protein complex involved in the folding of alpha-tubulin, beta-tubulin, and actin bovine NABC complex component homolog non-native actin binding complex polypeptide 6 prefoldin complex subunit                                                                                                                                                                                                                                                                                                                                                                           |
| YJL179W                 | [PFD1] Subunit of heterohexameric prefoldin, which binds cytosolic chaperonin and transfers target proteins to it; involved in the biogenesis of actin and of alpha- and gamma-tubulin bovine prefoldin subunit 1 homolog (putative)                                                                                                                                                                                                                                                                                                                                                                                           |
| <a href="#">YNL153C</a> | [GIM3] Subunit of the heterohexameric cochaperone prefoldin complex which binds specifically to cytosolic chaperonin and transfers target proteins to it bovine prefoldin subunit 4 homolog (putative)                                                                                                                                                                                                                                                                                                                                                                                                                         |
| <a href="#">YGR078C</a> | [PAC10] Part of the heteromeric co-chaperone GimC/prefoldin complex, which promotes efficient protein folding bovine NABC complex component homolog non-native actin binding complex polypeptide 3 prefoldin complex subunit Null mutant is viable, benomyl sensitive, cold sensitive, microtubules disassemble at 14 degrees celsius, pac10 mutants exhibit synthetic lethality with tub4-1, cin8, cin1, pac2 and rbl2 mutants                                                                                                                                                                                                |
| <a href="#">YEL003W</a> | [GIM4] Subunit of the heterohexameric cochaperone prefoldin complex which binds specifically to cytosolic chaperonin and transfers target proteins to it bovine prefoldin subunit 2 homolog (putative) Null mutant is viable, sensitive to anti-microtubule drugs benomyl and nocadazole; synthetically lethal with tub4-1 mutations                                                                                                                                                                                                                                                                                           |
| <a href="#">YML094W</a> | [GIM5] Subunit of the heterohexameric cochaperone prefoldin complex which binds specifically to cytosolic chaperonin and transfers target proteins to it bovine prefoldin subunit 5 homolog (putative) Null mutant is viable, cold sensitive, benomyl and nocadazole sensitive and fails to grow on YPD+1.2M KCl or YPD+1.8M sorbitol ; synthetically lethal with tub4-1 mutations                                                                                                                                                                                                                                             |
| 0419                    | GO_TERM:[regulation of nitrogen utilization] P-Value:1.0e-04                                                                                                                                                                                                                                                                                                                                                                                                                                                                                                                                                                   |
| YJL110C                 | [GZF3] GATA zinc finger protein and Dal80p homolog that negatively regulates nitrogen catabolic gene expression by competing with Gat1p for GATA site binding; function requires a repressive carbon source; dimerizes with Dal80p and binds to Tor1p GATA zinc finger protein 3 homologous to Dal80 in structure and function Null mutant is partially NCR-insensitive                                                                                                                                                                                                                                                        |
| YKR034W                 | [DAL80] Negative regulator of genes in multiple nitrogen degradation pathways; expression is regulated by nitrogen levels and by Gln3p; member of the GATA-binding family, forms homodimers and heterodimers with Deh1p GATA family transcriptional repressor Null mutant is viable, deficient in allantoin degradation                                                                                                                                                                                                                                                                                                        |
| YBR246W                 |                                                                                                                                                                                                                                                                                                                                                                                                                                                                                                                                                                                                                                |
| YDR520C                 |                                                                                                                                                                                                                                                                                                                                                                                                                                                                                                                                                                                                                                |

|                         |                                                                                                                                                                                                                                                                                                                                                                                  |
|-------------------------|----------------------------------------------------------------------------------------------------------------------------------------------------------------------------------------------------------------------------------------------------------------------------------------------------------------------------------------------------------------------------------|
| 0420                    | GO_TERM:[error-free DNA repair] P-Value:2.4e-11                                                                                                                                                                                                                                                                                                                                  |
| YHR111W                 | [UBA4] Protein that activates Urm1p before its conjugation to proteins (urmylation); one target is the thioredoxin peroxidase Ahp1p, suggesting a role of urmylation in the oxidative stress response                                                                                                                                                                            |
| YIL008W                 | [URM1] Ubiquitin-like protein with only weak sequence similarity to ubiquitin; depends on the E1-like activating enzyme Uba4p; molecular function of the Urm1p pathway is unknown, but it is required for normal growth, particularly at high temperature ubiquitin-like protein Null mutant is viable and has temperature-sensitive growth defect at 37 degrees C               |
| YIL152W                 |                                                                                                                                                                                                                                                                                                                                                                                  |
| YLR046C                 |                                                                                                                                                                                                                                                                                                                                                                                  |
| YIL132C                 | [CSM2] Protein required for accurate chromosome segregation during meiosis Null: missegregates chromosomes in meiosis                                                                                                                                                                                                                                                            |
| YDR078C                 | [SHU2] Protein of unassigned function involved in mutation suppression, important for error-free repair of spontaneous and induced DNA lesions to protect the genome from mutation; associates with Shu1p, Psy3p, and Csm2p Null: MMS sensitive                                                                                                                                  |
| YHL006C                 | [SHU1] Protein of unassigned function involved in mutation suppression, important for error-free repair of spontaneous and induced DNA lesions to protect the genome from mutation; associates with Shu2p, Psy3p, and Csm2p Null: Null mutant is viable and MMS sensitive, suppresses HU sensitivity of certain other mutations                                                  |
| YLR376C                 | [PSY3] Protein of unknown function; deletion results in a mutator phenotype suggesting a role for this protein as a mutational suppressor; deletion increases sensitivity to anticancer drugs oxaliplatin and cisplatin but not mitomycin C                                                                                                                                      |
| 0421                    | GO_TERM:[microtubule cytoskeleton] P-Value:4.1e-07 OVERLAP:[Tubulin-associated proteins] <140.30.20> SIZE:14                                                                                                                                                                                                                                                                     |
| YGR205W                 |                                                                                                                                                                                                                                                                                                                                                                                  |
| YLR210W                 | [CLB4] B-type cyclin involved in cell cycle progression; activates Cdc28p to promote the G2/M transition; may be involved in DNA replication and spindle assembly; accumulates during S phase and G2, then targeted for ubiquitin-mediated degradation B-type cyclin                                                                                                             |
| YPL155C                 | [KIP2] Kinesin-related motor protein involved in mitotic spindle positioning, stabilizes microtubules by targeting Bik1p to the plus end; Kip2p levels are controlled during the cell cycle kinesin related protein                                                                                                                                                              |
| <a href="#">YER016W</a> | [BIM1] Microtubule-binding protein that together with Kar9p makes up the cortical microtubule capture site and delays the exit from mitosis when the spindle is oriented abnormally Null mutant is viable, causes cold sensitivity, benomyl supersensitivity, aberrant microtubule morphology. During mitosis in bim1 mutants, the nucleus fails to move to the mother-bud neck. |
| <a href="#">YCL029C</a> | [BIK1] Microtubule-associated protein, component of the interface between microtubules and kinetochore, involved in sister chromatid separation; essential in polyploid cells but not in haploid or diploid cells; ortholog of mammalian CLIP-170 Null mutant is viable, bik1 mutants exhibit bilateral defects in karyogamy                                                     |
| <a href="#">YLR045C</a> | [STU2] Microtubule-associated protein (MAP) of the XMAP215/Dis1 family; regulates microtubule dynamics during spindle orientation and metaphase chromosome alignment; interacts with spindle pole body component Spc72p                                                                                                                                                          |
| YPL269W                 | [KAR9] Karyogamy protein required for correct positioning of the mitotic spindle and for orienting cytoplasmic microtubules, localizes at the shmoo tip in mating cells and at the tip of the growing bud in small-budded cells through anaphase Null mutant is viable; cytoplasmic microtubule orientation defects, nuclear migration defects, benomyl sensitive                |
| 0422                    | GO_TERM:[spindle midzone] P-Value:3.3e-07 OVERLAP:[CCR4 complex] <510.190.110> SIZE:13                                                                                                                                                                                                                                                                                           |
| YBR222C                 | [PCS60] Peroxisomal AMP-binding protein, localizes to both the peroxisomal peripheral membrane and matrix, expression is highly inducible by oleic acid, similar to E. coli long chain acyl-CoA synthetase                                                                                                                                                                       |
| YGR031W                 |                                                                                                                                                                                                                                                                                                                                                                                  |
| YPR111W                 | [DBF20] Ser/Thr kinase involved in late nuclear division, one of the mitotic exit network (MEN) proteins; necessary for the execution of cytokinesis Ser/Thr Kinase Dumbell formation                                                                                                                                                                                            |
| YBR255W                 |                                                                                                                                                                                                                                                                                                                                                                                  |
| YJR089W                 | [BIR1] Essential chromosomal passenger protein involved in coordinating cell cycle events for proper chromosome segregation; C-terminal region binds Sli15p, and the middle region, upon phosphorylation, localizes Cbf2p to the spindle at anaphase                                                                                                                             |
| YPL209C                 | [IPL1] Aurora kinase involved in regulating kinetochore-microtubule attachments, associates with Sli15p, which stimulates Ipl1p kinase activity and promotes its association with the mitotic spindle, potential Cdc28p substrate protein kinase temperature-sensitive mutant lacks proper chromosome segregation at non-permissive temperature                                  |
| YBR156C                 | [SLI15] Subunit of the Ipl1p-Sli15p-Bir1p complex that regulates kinetochore-microtubule attachments, activation of the spindle tension checkpoint, and mitotic spindle disassembly; regulates the activity and localization of the Ipl1p aurora kinase Null mutant is inviable; sli15 conditional mutations are sythetically lethal with ipl1-2 alleles.                        |
| <a href="#">YIL106W</a> | [MOB1] Component of the mitotic exit network; associates with and is required for the activation and Cdc15p-dependent phosphorylation of the Dbf2p kinase; required for cytokinesis and cell separation; component of the CCR4 transcriptional complex Null mutant is inviable; conditional mutants arrest in late mitosis                                                       |
| 0423                    | GO_TERM:[cellular morphogenesis during vegetative growth] P-Value:5.2e-16                                                                                                                                                                                                                                                                                                        |
| YIL129C                 | [TAO3] Protein involved in cell morphogenesis and proliferation, associated with protein kinase Cbk1p; mutants activate OCH1 transcription tao3 mutants activate OCH1 transcription and form aggregates. Null mutant is viable in the W303 background                                                                                                                            |

|                  |                                                                                                                                                                                                                                                                                                                                                                                                                                                                                                                                                                                                                                       |
|------------------|---------------------------------------------------------------------------------------------------------------------------------------------------------------------------------------------------------------------------------------------------------------------------------------------------------------------------------------------------------------------------------------------------------------------------------------------------------------------------------------------------------------------------------------------------------------------------------------------------------------------------------------|
| YKL189W          | [HYM1] Component of the RAM signaling network that is involved in regulation of Ace2p activity and cellular morphogenesis, interacts with Kic1p and Sog2p, localizes to sites of polarized growth during budding and during the mating response                                                                                                                                                                                                                                                                                                                                                                                       |
| YHR102W          | [KIC1] Protein kinase of the PAK/Ste20 kinase family, required for cell integrity possibly through regulating 1,6-beta-glucan levels in the wall; physically interacts with Cdc31p (centrin), which is a component of the spindle pole body                                                                                                                                                                                                                                                                                                                                                                                           |
| YOR353C          | [SOG2] Protein required for cell morphogenesis and cell separation after mitosis                                                                                                                                                                                                                                                                                                                                                                                                                                                                                                                                                      |
| YLR131C          | [ACE2] Transcription factor that activates expression of early G1-specific genes, localizes to daughter cell nuclei after cytokinesis and delays G1 progression in daughters, localization is regulated by phosphorylation; potential Cdc28p substrate zinc finger transcription factor Null mutant is viable, exhibits decreased CUP1 mRNA expression                                                                                                                                                                                                                                                                                |
| YOL036W          |                                                                                                                                                                                                                                                                                                                                                                                                                                                                                                                                                                                                                                       |
| YNL161W          | [CBK1] Serine/threonine protein kinase that regulates cell morphogenesis pathways; involved in cell wall biosynthesis, apical growth, proper mating projection morphology, bipolar bud site selection in diploid cells, and cell separation serine/threonine protein kinase Null mutation is viable; shows alpha factor resistance; in liquid culture large aggregates of cells are formed                                                                                                                                                                                                                                            |
| YFL034C-B        | [MOB2] Component of the RAM signaling network, localizes and activates the Ace2p in the daughter cell nucleus to direct daughter cell-specific transcription of several genes involved in cell separation; Mob1p-like protein Mob1p-like protein Null is viable; other mutants have synthetic interactions with MPS1                                                                                                                                                                                                                                                                                                                  |
| YIR016W          |                                                                                                                                                                                                                                                                                                                                                                                                                                                                                                                                                                                                                                       |
| 0424             | GO_TERM:[mitochondrial genome maintenance] P-Value:3.8e-04                                                                                                                                                                                                                                                                                                                                                                                                                                                                                                                                                                            |
| YEL065W          | [SIT1] Ferrioxamine B transporter, member of the ARN family of transporters that specifically recognize siderophore-iron chelates; transcription is induced during iron deprivation and diauxic shift; potentially phosphorylated by Cdc28p ferrioxamine B permease Viable. Cells deleted from the gene are unable to take up ferrioxamine B                                                                                                                                                                                                                                                                                          |
| YDR077W          | [SED1] Major stress-induced structural GPI-cell wall glycoprotein in stationary-phase cells, associates with translating ribosomes, possible role in mitochondrial genome maintenance; ORF contains two distinct variable minisatellites cell surface glycoprotein (putative) Null mutant is viable; during stationary phase, null mutants exhibit increased sensitivity to Zymolyase.                                                                                                                                                                                                                                                |
| YOR330C          | [MIP1] Catalytic subunit of the mitochondrial DNA polymerase mitochondrial DNA polymerase catalytic subunit Null mutant is viable, associated with total loss of mitochondrial DNA and mitochondrial DNA polymerase activity                                                                                                                                                                                                                                                                                                                                                                                                          |
| 0425             | GO_TERM:[dynactin complex] P-Value:3.6e-11 OVERLAP:[Dynactin complex] <140.30.30.30> SIZE:3                                                                                                                                                                                                                                                                                                                                                                                                                                                                                                                                           |
| YNR068C          |                                                                                                                                                                                                                                                                                                                                                                                                                                                                                                                                                                                                                                       |
| YLL049W          | [LDB18] Protein of unknown function; null mutant shows a reduced affinity for the alcian blue dye suggesting a decreased net negative charge of the cell surface                                                                                                                                                                                                                                                                                                                                                                                                                                                                      |
| YNR069C          | [BSC5] Protein of unknown function, ORF exhibits genomic organization compatible with a translational readthrough-dependent mode of expression                                                                                                                                                                                                                                                                                                                                                                                                                                                                                        |
| YBL106C          | [SRO77] Protein with roles in exocytosis and cation homeostasis; functions in docking and fusion of post-Golgi vesicles with plasma membrane; homolog of Sro7p and Drosophila lethal giant larvae tumor suppressor; interacts with SNARE protein Sec9p yeast homolog of the Drosophila tumor suppressor, lethal giant larvae Null mutant is viable and shows no phenotypes, but is cs- in combination with sro7/sni1 (YPR032W) null; sro7/sni1 sro7/sni2 double mutants have an exocytic defect, accumulate post-Golgi vesicles, have partially delocalized actin, and suppress the growth and cell separation defects of myo1 cells. |
| YPR083W          | [MDM36] Protein required for normal mitochondrial morphology and inheritance                                                                                                                                                                                                                                                                                                                                                                                                                                                                                                                                                          |
| YJR008W          |                                                                                                                                                                                                                                                                                                                                                                                                                                                                                                                                                                                                                                       |
| <b>YPL174C</b>   | [NIP100] Large subunit of the dynactin complex, which is involved in partitioning the mitotic spindle between mother and daughter cells; putative ortholog of mammalian p150(glued) large subunit of dynactin complex (putative) Null mutant is viable but exhibits slow growth and defects in partitioning into daughter cells.                                                                                                                                                                                                                                                                                                      |
| <b>YMR294W</b>   | [JNM1] Component of the yeast dynactin complex, consisting of Nip100p, Jnm1p, and Arp1p; required for proper nuclear migration and spindle partitioning during mitotic anaphase B                                                                                                                                                                                                                                                                                                                                                                                                                                                     |
| YDR106W          | [ARP10] Component of the dynactin complex, localized to the pointed end of the Arp1p filament; may regulate membrane association of the complex                                                                                                                                                                                                                                                                                                                                                                                                                                                                                       |
| <b>YHR129C</b>   | [ARP1] Actin-related protein of the dynactin complex; required for spindle orientation and nuclear migration; putative ortholog of mammalian cetractin Null mutant is viable, but both null mutations and overexpression lead to defects in spindle orientation and nuclear migration (during mitosis in arp1 mutants the nucleus fails to move into the neck).                                                                                                                                                                                                                                                                       |
| 0426             | GO_TERM:[telomerase activity] P-Value:4.2e-06 OVERLAP:[Telomerase] <410.50> SIZE:4                                                                                                                                                                                                                                                                                                                                                                                                                                                                                                                                                    |
| YBL064C          | [PRX1] Mitochondrial peroxiredoxin (1-Cys Prx) with thioredoxin peroxidase activity, has a role in reduction of hydroperoxides; induced during respiratory growth and under conditions of oxidative stress peroxiredoxin                                                                                                                                                                                                                                                                                                                                                                                                              |
| <b>YIL009C-A</b> | [EST3] Component of the telomerase holoenzyme, involved in telomere replication 20.5 kDa 181aa protein Null mutant shows progressively shorter telomeres and cellular senescence; telomerase activity is still present in est3-* extracts                                                                                                                                                                                                                                                                                                                                                                                             |
| <b>YLR318W</b>   | [EST2] Reverse transcriptase subunit of the telomerase holoenzyme, essential for telomerase core catalytic activity, involved in other aspects of telomerase assembly and function; mutations in human homolog are associated with aplastic anemia telomerase reverse transcriptase Null mutant is viable, exhibits progressively shorter telomeres, cellular senescence and a telomerase-minus defect; est2 rad52 mutants are inviable                                                                                                                                                                                               |

|                         |                                                                                                                                                                                                                                                                                                                                                                                                                                                                                                                                                                                                                                                       |
|-------------------------|-------------------------------------------------------------------------------------------------------------------------------------------------------------------------------------------------------------------------------------------------------------------------------------------------------------------------------------------------------------------------------------------------------------------------------------------------------------------------------------------------------------------------------------------------------------------------------------------------------------------------------------------------------|
| 0427                    | GO_TERM:[microtubule motor activity] P-Value:2.8e-05 OVERLAP:[Dynein-complex motorproteins] <140.30.30.20> SIZE:3                                                                                                                                                                                                                                                                                                                                                                                                                                                                                                                                     |
| YEL070W                 | [DSF1] Deletion suppressor of mpt5 mutation                                                                                                                                                                                                                                                                                                                                                                                                                                                                                                                                                                                                           |
| YNR058W                 | [BIO3] 7,8-diamino-pelargonic acid aminotransferase (DAPA), catalyzes the second step in the biotin biosynthesis pathway; BIO3 is in a cluster of 3 genes (BIO3, BIO4, and BIO5) that mediate biotin synthesis 7,8-diamino-pelargonic acid aminotransferase (DAPA) aminotransferase                                                                                                                                                                                                                                                                                                                                                                   |
| YOR172W                 | [YRM1] Zn2-Cys6 zinc-finger transcription factor that activates genes involved in multidrug resistance; paralog of Yrr1p, acting on an overlapping set of target genes zinc finger transcription factor                                                                                                                                                                                                                                                                                                                                                                                                                                               |
| <a href="#">YDR424C</a> | [DYN2] Cytoplasmic light chain dynein, microtubule motor protein dynein light chain (putative)                                                                                                                                                                                                                                                                                                                                                                                                                                                                                                                                                        |
| <a href="#">YDR488C</a> | [PAC11] Dynein intermediate chain, acts in the cytoplasmic dynein pathway, forms cortical cytoplasmic microtubule capture site with Num1p; null mutant is defective in nuclear migration, essential in the absence of CIN8                                                                                                                                                                                                                                                                                                                                                                                                                            |
| 0428                    | GO_TERM:[autophagy] P-Value:8.9e-05                                                                                                                                                                                                                                                                                                                                                                                                                                                                                                                                                                                                                   |
| YPL159C                 | [PET20] Protein required for respiratory growth and stability of the mitochondrial genome Null: exhibits growth defect on non-fermentable carbon source at 15 degree centigrade, making cells rho-.                                                                                                                                                                                                                                                                                                                                                                                                                                                   |
| YJR024C                 |                                                                                                                                                                                                                                                                                                                                                                                                                                                                                                                                                                                                                                                       |
| YJR156C                 | [THI11] Protein involved in synthesis of the thiamine precursor hydroxymethylpyrimidine (HMP); member of a subtelomeric gene family including THI5, THI11, THI12, and THI13 thiamine biosynthetic enzyme                                                                                                                                                                                                                                                                                                                                                                                                                                              |
| YHR043C                 | [DOG2] 2-deoxyglucose-6-phosphate phosphatase, member of a family of low molecular weight phosphatases, similar to Dog1p, induced by oxidative and osmotic stress, confers 2-deoxyglucose resistance when overexpressed 2-deoxyglucose-6-phosphate phosphatase                                                                                                                                                                                                                                                                                                                                                                                        |
| YLR108C                 |                                                                                                                                                                                                                                                                                                                                                                                                                                                                                                                                                                                                                                                       |
| YLR423C                 | [ATG17] Protein that interacts with and is required for activation of Apg1p protein kinase; involved in autophagy but not in the Cvt (cytoplasm to vacuole targeting) pathway required for activation of Apg1 protein kinase Null mutant is viable and has defect in autophagy                                                                                                                                                                                                                                                                                                                                                                        |
| YPL166W                 | [ATG29] Protein of unknown function; green fluorescent protein (GFP)-fusion protein localizes to the cytoplasm in a punctate pattern                                                                                                                                                                                                                                                                                                                                                                                                                                                                                                                  |
| YPR049C                 | [ATG11] Peripheral membrane protein required for delivery of aminopeptidase I (Lap4p) to the vacuole in the cytoplasm-to-vacuole targeting pathway; also required for peroxisomal degradation (pexophagy) Oligomeric, coiled-coil, peripheral membrane protein required for stable binding of precursor API to its target membrane. cvt9 is defective in maturation of the vacuolar protein, aminopeptidase I and exhibits minor defects in autophagy cvt9 is defective in vacuolar delivery of aminopeptidase I and peroxisome degradation but is not needed for macroautophagy. The null mutant is viable and is relatively starvation-insensitive. |
| 0429                    | GO_TERM:[biological_process] P-Value:9.6e-02                                                                                                                                                                                                                                                                                                                                                                                                                                                                                                                                                                                                          |
| YLL032C                 |                                                                                                                                                                                                                                                                                                                                                                                                                                                                                                                                                                                                                                                       |
| YML119W                 |                                                                                                                                                                                                                                                                                                                                                                                                                                                                                                                                                                                                                                                       |
| 0430                    |                                                                                                                                                                                                                                                                                                                                                                                                                                                                                                                                                                                                                                                       |
| YDR313C                 | [PIB1] RING-type ubiquitin ligase of the endosomal and vacuolar membranes, binds phosphatidylinositol(3)-phosphate; contains a FYVE finger domain                                                                                                                                                                                                                                                                                                                                                                                                                                                                                                     |
| YPL133C                 | [RDS2] Zinc cluster protein involved in conferring resistance to ketoconazole transcriptional regulator Null: sensitive to ketoconazole. Other phenotypes: inability to grow on non-fermentable carbon sources, sensitivity to calcofluor white Null mutant is viable; cannot utilize glycerol and lactate as sole carbon source; hypersensitive to calcofluor white                                                                                                                                                                                                                                                                                  |
| 0431                    | GO_TERM:[SUMO activating enzyme activity] P-Value:3.5e-07                                                                                                                                                                                                                                                                                                                                                                                                                                                                                                                                                                                             |
| YHR063C                 | [PAN5] 2-dehydropantoate 2-reductase, part of the pantothenic acid pathway, structurally homologous to E. coli panE                                                                                                                                                                                                                                                                                                                                                                                                                                                                                                                                   |
| YDR390C                 | [UBA2] Nuclear protein that acts as a heterodimer with Aos1p to activate Smt3p (SUMO) before its conjugation to proteins (sumoylation), which may play a role in protein targeting; essential for viability                                                                                                                                                                                                                                                                                                                                                                                                                                           |
| YPR180W                 | [AOS1] Nuclear protein that acts as a heterodimer with Uba2p to activate Smt3p (SUMO) before its conjugation to proteins (sumoylation), which may play a role in protein targeting; essential for viability                                                                                                                                                                                                                                                                                                                                                                                                                                           |
| 0432                    |                                                                                                                                                                                                                                                                                                                                                                                                                                                                                                                                                                                                                                                       |
| YDR049W                 |                                                                                                                                                                                                                                                                                                                                                                                                                                                                                                                                                                                                                                                       |
| YKL204W                 | [EAP1] eIF4E-associated protein, binds eIF4E and inhibits cap-dependent translation, also functions independently of eIF4E to maintain genetic stability; plays a role in cell growth, implicated in the TOR signaling cascade Mutant is temperature sensitive and partially resistant to rapamycin                                                                                                                                                                                                                                                                                                                                                   |
| 0433                    | GO_TERM:[sporulation] P-Value:6.8e-03                                                                                                                                                                                                                                                                                                                                                                                                                                                                                                                                                                                                                 |

|                |                                                                                                                                                                                                                                                                                                                                                                                                                                                                                                                                          |
|----------------|------------------------------------------------------------------------------------------------------------------------------------------------------------------------------------------------------------------------------------------------------------------------------------------------------------------------------------------------------------------------------------------------------------------------------------------------------------------------------------------------------------------------------------------|
| YBR273C        | [UBX7] UBX (ubiquitin regulatory X) domain-containing protein that interacts with Cdc48p                                                                                                                                                                                                                                                                                                                                                                                                                                                 |
| YJL048C        | [UBX6] UBX (ubiquitin regulatory X) domain-containing protein that interacts with Cdc48p, transcription is repressed when cells are grown in media containing inositol and choline                                                                                                                                                                                                                                                                                                                                                       |
| 0434           | GO_TERM:[ubiquitin cycle] P-Value:9.0e-03                                                                                                                                                                                                                                                                                                                                                                                                                                                                                                |
| YKL020C        | [SPT23] ER membrane protein involved, with its homolog Mga2p, in regulation of OLE1 transcription; inactive ER form dimerizes and one subunit is then activated by ubiquitin/proteasome-dependent processing followed by nuclear targeting Null mutant does not have an Spt-phenotype. Disruption does not significantly affect cell growth or fatty acid metabolism.                                                                                                                                                                    |
| YFL044C        | [OTU1] Deubiquitylation enzyme that binds to the chaperone-ATPase Cdc48p; may contribute to regulation of protein degradation by deubiquitylating substrates that have been ubiquitylated by Ufd2p; member of the Ovarian Tumor (OTU) family De-ubiquitylation enzyme (DUB) of the OTU (ovarian tumor) family                                                                                                                                                                                                                            |
| YKL213C        | [DOA1] WD repeat protein required for ubiquitin-mediated protein degradation, forms complex with Cdc48p, plays a role in controlling cellular ubiquitin concentration; also promotes efficient NHEJ in postdiauxic/stationary phase regulatory component of the proteasome pathway Null mutant is viable and defective in degradation of ubiquitinated proteins; homozygous null diploid shows sporulation defect                                                                                                                        |
| 0435           | GO_TERM:[ER-associated protein catabolism] P-Value:7.4e-19                                                                                                                                                                                                                                                                                                                                                                                                                                                                               |
| YOL013C        | [HRD1] Ubiquitin-protein ligase required for endoplasmic reticulum-associated degradation (ERAD) of misfolded proteins; genetically linked to the unfolded protein response (UPR); regulated through association with Hrd3p; contains an H2 ring finger Null mutant is viable, slows degradation of Hmg2p                                                                                                                                                                                                                                |
| YML029W        | [USA1] Protein that interacts in the two-hybrid system with the U1 snRNP-specific protein, Snp1p; may have a role in pre-mRNA splicing pre-mRNA splicing factor (putative)                                                                                                                                                                                                                                                                                                                                                               |
| YDR057W        | [YOS9] Lectin; soluble luminal ER protein; member of the OS-9 protein family; similar to mannose-6-phosphate receptors (MPRs); serves as a receptor that recognizes misfolded N-glycosylated proteins and participates in their targeting to ERAD membrane-associated glycoprotein Accelerates Gas1 transport and processing in cells overexpressing YOS9. Gas1 processing is slowed in cells bearing a deletion in YOS9.                                                                                                                |
| YLR207W        | [HRD3] Resident protein of the ER membrane that plays a central role in ER-associated protein degradation (ERAD), forms HRD complex with Hrd1p and ERAD determinants that engages in lumen to cytosol communication and coordination of ERAD events Null mutant is viable, slows degradation of Hmg2p                                                                                                                                                                                                                                    |
| YLR450W        | [HMG2] One of two isozymes of HMG-CoA reductase that convert HMG-CoA to mevalonate, a rate-limiting step in sterol biosynthesis; overproduction induces assembly of peripheral ER membrane arrays and short nuclear-associated membrane stacks 3-hydroxy-3-methylglutaryl-coenzyme A (HMG-CoA) reductase isozyme Null mutant is viable, sensitive to compactin, a competitive inhibitor of HMG-CoA reductase; hmg1 hmg2 double deletion mutants are inviable                                                                             |
| YIL030C        | [SSM4] Ubiquitin-protein ligase of the ER/nuclear envelope, required for degradation of Alpha2p and other proteins containing a Deg1 degradation signal; ssm4 mutation suppresses mRNA instability caused by an rna14 mutation integral membrane protein Null mutant is viable, suppresses temperature sensitive rna14 mutations; ssm4 sls1 mutants are inviable                                                                                                                                                                         |
| YDL126C        | [CDC48] ATPase in ER, nuclear membrane and cytosol with homology to mammalian p97; in a complex with Npl4p and Ufd1p participates in retrotranslocation of ubiquitinated proteins from the ER into the cytosol for degradation by the proteasome                                                                                                                                                                                                                                                                                         |
| YBR201W        | [DER1] Endoplasmic reticulum membrane protein, required for ER-associated protein degradation, involved in the retrograde transport of misfolded or unassembled proteins; N- and C- termini protrude into the cytoplasm, has similarity to Dfm1p Null mutant is viable, but blocks ER-degradation of target proteins                                                                                                                                                                                                                     |
| YML013W        | [SEL1] UBX (ubiquitin regulatory X) domain-containing protein that interacts with Cdc48p, has a ubiquitin-associated (UBA) domain, interacts with ubiquitylated proteins in vivo, and is required for degradation of a ubiquitylated model substrate Null: enhanced secretion                                                                                                                                                                                                                                                            |
| YBR170C        | [NPL4] Endoplasmic reticulum and nuclear membrane protein, forms a complex with Cdc48p and Ufd1p that recognizes ubiquitinated proteins in the endoplasmic reticulum and delivers them to the proteasome for degradation Temperature-sensitive mutants accumulate nuclear-targeted proteins in the cytoplasm and poly(A)+RNA in the nucleus and show defects in nuclear membrane integrity at the nonpermissive temperature                                                                                                              |
| YGR048W        | [UFD1] Protein that interacts with Cdc48p and Npl4p, involved in recognition of polyubiquitinated proteins and their presentation to the 26S proteasome for degradation; involved in transporting proteins from the ER to the cytosol Homozygous ufd1-1 mutant diploids exhibit sporulation defects. loss of Ufd1 blocks ER-associated protein degradation at a post-ubiquitination but pre-proteasome step.                                                                                                                             |
| 0436           | GO_TERM:[signal transduction] P-Value:7.0e-07 OVERLAP:[H+-ATPase, plasma membrane] <210> SIZE:4                                                                                                                                                                                                                                                                                                                                                                                                                                          |
| YLR178C        | [TFS1] Carboxypeptidase Y inhibitor, function requires acetylation by the NatB N-terminal acetyltransferase; phosphatidylethanolamine-binding protein involved in protein kinase A signaling pathway lipid binding protein (putative) suppressor of a cdc25 mutation                                                                                                                                                                                                                                                                     |
| YNL009W        | [IDP3] Peroxisomal NADP-dependent isocitrate dehydrogenase, catalyzes oxidation of isocitrate to alpha-ketoglutarate with the formation of NADP(H+), required for growth on unsaturated fatty acids NADP-dependent isocitrate dehydrogenase Null mutant is viable but is unable to grow on polyunsaturated fatty acids as sole carbon source                                                                                                                                                                                             |
| <b>YPL036W</b> | [PMA2] Plasma membrane H+-ATPase, isoform of Pma1p, involved in pumping protons out of the cell; regulator of cytoplasmic pH and plasma membrane potential plasma membrane ATPase                                                                                                                                                                                                                                                                                                                                                        |
| YBR140C        | [IRA1] GTPase-activating protein that negatively regulates RAS by converting it from the GTP- to the GDP-bound inactive form, required for reducing cAMP levels under nutrient limiting conditions, mediates membrane association of adenylate cyclase GTPase activating protein (GAP) Null mutant is viable, exhibits constitutive activation of the Ras/cyclic AMP (cAMP) pathway, heat shock sensitivity, nitrogen starvation sensitivity, sporulation deficiency, suppresses lethality of cdc25, but not cyl1, ras1, or ras2 mutants |
| YOL081W        | [IRA2] GTPase-activating protein that negatively regulates RAS by converting it from the GTP- to the GDP-bound inactive form, required for reducing cAMP levels under nutrient limiting conditions, has similarity to Ira1p and human neurofibromin GTPase activating protein highly homologous to Ira1p neurofibromin homolog Null mutant is viable, exhibits increased sensitivity to heat shock and nitrogen starvation, sporulation defects. and suppression of the lethality of a cdc25 mutants                                     |

|         |                                                                                                                                                                                                                                                                                                                                                                           |
|---------|---------------------------------------------------------------------------------------------------------------------------------------------------------------------------------------------------------------------------------------------------------------------------------------------------------------------------------------------------------------------------|
| YAL056W | [GPB2] Proposed beta subunit of the heterotrimeric G protein that interacts with the receptor Grp1p, has signaling role in response to nutrients; involved in regulation of pseudohyphal growth through cAMP levels; homolog of Gpb1p Deletion causes a high PKA phenotype.                                                                                               |
| YER020W | [GPA2] Nucleotide binding alpha subunit of the heterotrimeric G protein that interacts with the receptor Gpr1p, has signaling role in response to nutrients; green fluorescent protein (GFP)-fusion protein localizes to the cell periphery nucleotide binding regulatory protein                                                                                         |
| YGL121C | [GPG1] Proposed gamma subunit of the heterotrimeric G protein that interacts with the receptor Grp1p; involved in regulation of pseudohyphal growth; requires Gpb1p or Gpb2p to interact with Gpa2p Heterotrimeric G protein gamma subunit mimic Null: A modest reduction in pseudohyphal differentiation, invasive growth, and FLO11 expression                          |
| YOR371C | [GPB1] Proposed beta subunit of the heterotrimeric G protein that interacts with the receptor Grp1p, has signaling role in response to nutrients; involved in regulation of pseudohyphal growth through cAMP levels; homolog of Gpb2p                                                                                                                                     |
| 0437    | GO_TERM:[biological_process] P-Value:9.6e-02                                                                                                                                                                                                                                                                                                                              |
| YGR294W | [YGR294W] Hypothetical protein                                                                                                                                                                                                                                                                                                                                            |
| YHL018W |                                                                                                                                                                                                                                                                                                                                                                           |
| 0438    | GO_TERM:[reproduction] P-Value:2.4e-02                                                                                                                                                                                                                                                                                                                                    |
| YGL084C | [GUP1] Plasma membrane protein with a possible role in proton symport of glycerol; member of the MBOAT family of putative membrane-bound O-acyltransferases                                                                                                                                                                                                               |
| YLR308W | [CDA2] Chitin deacetylase, together with Cda1p involved in the biosynthesis ascospore wall component, chitosan; required for proper rigidity of the ascospore wall chitin deacetylase Null mutant is viable, mutant spores disrupted for both cda1 and cda2 fail to emit natural fluorescence and are sensitive to hydrolytic enzymes, ether, and heat shock              |
| YKL105C |                                                                                                                                                                                                                                                                                                                                                                           |
| YGR070W | [ROM1] GDP/GTP exchange protein (GEP) for Rho1p; mutations are synthetically lethal with mutations in rom2, which also encodes a GEP Synthetically lethal with ROM2 (growth arrest with small bud and cell lysis)                                                                                                                                                         |
| YAL031C | [GIP4] Cytoplasmic Glc7p-interacting protein, potential Cdc28p substrate                                                                                                                                                                                                                                                                                                  |
| YCL027W | [FUS1] Membrane protein localized to the shmoo tip, required for cell fusion; expression regulated by mating pheromone; proposed to coordinate signaling, fusion, and polarization events required for fusion; potential Cdc28p substrate Null mutant is viable; in fus1 x fus1 matings there is an interruption of the mating process just before cytoplasmic fusion     |
| YNL058C |                                                                                                                                                                                                                                                                                                                                                                           |
| 0439    |                                                                                                                                                                                                                                                                                                                                                                           |
| YDR343C | [HXT6] High-affinity glucose transporter of the major facilitator superfamily, nearly identical to Hxt7p, expressed at high basal levels relative to other HXTs, repression of expression by high glucose requires SNF3 hexose transporter Null mutant is viable; snf3 hxt1 hxt2 hxt3 hxt4 hxt6 hxt7 mutant cannot grow on media containing glucose as sole carbon source |
| YOL100W | [PKH2] Serine/threonine protein kinase involved in sphingolipid-mediated signaling pathway that controls endocytosis; activates Ypk1p and Ykr2p, components of signaling cascade required for maintenance of cell wall integrity; redundant with Pkh1p Null mutant is viable; pkh1, pkh2 double mutant is lethal                                                          |
| 0440    |                                                                                                                                                                                                                                                                                                                                                                           |
| YBL036C |                                                                                                                                                                                                                                                                                                                                                                           |
| YDR342C | [HXT7] High-affinity glucose transporter of the major facilitator superfamily, nearly identical to Hxt6p, expressed at high basal levels relative to other HXTs, expression repressed by high glucose levels hexose transporter Null mutant is viable; snf3 hxt1 hxt2 hxt3 hxt4 HXT7 hxt7 mutant cannot grow on media containing glucose as sole carbon source            |
| 0441    | GO_TERM:[phosphoprotein phosphatase activity] P-Value:1.4e-03                                                                                                                                                                                                                                                                                                             |
| YDR061W |                                                                                                                                                                                                                                                                                                                                                                           |
| YOR043W | [WHI2] Protein required, with binding partner Psr1p, for full activation of the general stress response, possibly through Msn2p dephosphorylation; regulates growth during the diauxic shift; negative regulator of G1 cyclin expression                                                                                                                                  |
| YLL010C | [PSR1] Plasma membrane associated protein phosphatase involved in the general stress response; required along with binding partner Whi2p for full activation of STRE-mediated gene expression, possibly through dephosphorylation of Msn2p Mutant is sensitive to sodium ions.                                                                                            |
| YLR019W | [PSR2] Functionally redundant Psr1p homolog, a plasma membrane phosphatase involved in the general stress response; required with Psr1p and Whi2p for full activation of STRE-mediated gene expression, possibly through dephosphorylation of Msn2p Mutant is sensitive to sodium ions.                                                                                   |

|                |                                                                                                                                                                                                                                                                                                                                                                                                                                                                                                                                                                                 |
|----------------|---------------------------------------------------------------------------------------------------------------------------------------------------------------------------------------------------------------------------------------------------------------------------------------------------------------------------------------------------------------------------------------------------------------------------------------------------------------------------------------------------------------------------------------------------------------------------------|
| 0442           | GO_TERM:[cytoplasmic part] P-Value:7.9e-01                                                                                                                                                                                                                                                                                                                                                                                                                                                                                                                                      |
| YBR045C        | [GIP1] Meiosis-specific regulatory subunit of the Glc7p protein phosphatase, regulates spore wall formation and septin organization, required for expression of some late meiotic genes and for normal localization of Glc7p Glc7p regulatory subunit                                                                                                                                                                                                                                                                                                                           |
| YGL057C        |                                                                                                                                                                                                                                                                                                                                                                                                                                                                                                                                                                                 |
| 0443           | GO_TERM:[mating projection] P-Value:2.0e-07 OVERLAP:[STE5-MAPK complex] <470.20> SIZE:5                                                                                                                                                                                                                                                                                                                                                                                                                                                                                         |
| YER132C        | [PMD1] Protein with an N-terminal kelch-like domain, putative negative regulator of early meiotic gene expression; required, with Mds3p, for growth under alkaline conditions                                                                                                                                                                                                                                                                                                                                                                                                   |
| YNR032C-A      | [HUB1] Ubiquitin-like protein modifier, may function in modification of Sph1p and Hbt1p, functionally complemented by the human or S. pombe ortholog; mechanism of Hub1p adduct formation not yet clear ubiquitin-like modifier                                                                                                                                                                                                                                                                                                                                                 |
| YLR313C        | [SPH1] Protein involved in shmoo formation and bipolar bud site selection; homologous to Spa2p, localizes to sites of polarized growth in a cell cycle dependent- and Spa2p-dependent manner, interacts with MAPKs Mkk1p, Mkk2p, and Ste7p Spa2p homolog                                                                                                                                                                                                                                                                                                                        |
| <b>YDR103W</b> | [STE5] Scaffold protein that, in response to pheromone, shuttles from the nucleus to the plasma membrane and assembles kinases Ste11p, Ste7p, and Fus3p into a specific signaling complex; active oligomeric form interacts with Ste4p-Ste18p complex Null mutant is viable but sterile. Overexpression of STE5 suppresses the temperature sensitivity of a cdc25 allele.                                                                                                                                                                                                       |
| <b>YDL159W</b> | [STE7] Signal transducing MAP kinase kinase involved in pheromone response, where it phosphorylates Fus3p, and in the pseudohyphal/invasive growth pathway, through phosphorylation of Kss1p; phosphorylated by Ste11p, degraded by ubiquitin pathway MAP kinase kinase (MEK)                                                                                                                                                                                                                                                                                                   |
| <b>YLR362W</b> | [STE11] Signal transducing MEK kinase involved in pheromone response and pseudohyphal/invasive growth pathways, where it phosphorylates Ste7p, and the high osmolarity response pathway, via phosphorylation of Pbs2p; regulated by Ste20p and Ste50p                                                                                                                                                                                                                                                                                                                           |
| 0444           | GO_TERM:[cytoskeletal regulatory protein binding] P-Value:5.4e-10 OVERLAP:[Actin-associated proteins] <140.20.20> SIZE:25                                                                                                                                                                                                                                                                                                                                                                                                                                                       |
| YEL001C        |                                                                                                                                                                                                                                                                                                                                                                                                                                                                                                                                                                                 |
| YGR126W        |                                                                                                                                                                                                                                                                                                                                                                                                                                                                                                                                                                                 |
| YDL233W        |                                                                                                                                                                                                                                                                                                                                                                                                                                                                                                                                                                                 |
| YMR124W        |                                                                                                                                                                                                                                                                                                                                                                                                                                                                                                                                                                                 |
| YKL034W        | [TUL1] Golgi-localized RING-finger ubiquitin ligase (E3), involved in ubiquitinating and sorting membrane proteins that contain polar transmembrane domains to multivesicular bodies for delivery to the vacuole for quality control purposes RING-domain E3 ubiquitin ligase Null: Blocks ubiquitin-dependent sorting of some proteins (e.g. Cps1p, Phm5p) into multivesicular bodies                                                                                                                                                                                          |
| YIL040W        | [APQ12] Protein involved in nucleocytoplasmic transport of mRNA                                                                                                                                                                                                                                                                                                                                                                                                                                                                                                                 |
| YGL015C        |                                                                                                                                                                                                                                                                                                                                                                                                                                                                                                                                                                                 |
| YOR188W        | [MSB1] Protein involved in positive regulation of both 1,3-beta-glucan synthesis and the Pkc1p-MAPK pathway, potential Cdc28p substrate; multicopy suppressor of temperature-sensitive mutations in CDC24 and CDC42, and of mutations in BEM4 multicopy suppressor of cdc24 and cdc42 ts mutations                                                                                                                                                                                                                                                                              |
| YNL293W        | [MSB3] GTPase-activating protein for Sec4p and several other Rab GTPases, regulates exocytosis via its action on Sec4p, also required for proper actin organization; similar to Msb4p; both Msb3p and Msb4p localize to sites of polarized growth GTPase activating protein (GAP) for Ypt6 Null mutant is viable. msb3/msb4 double mutant exhibits slow growth and disorganized actin cytoskeleton                                                                                                                                                                              |
| YNL271C        | [BNI1] Formin, nucleates the formation of linear actin filaments, involved in cell processes such as budding and mitotic spindle orientation which require the formation of polarized actin cables, functionally redundant with BNR1 formin, involved in spindle orientation Null mutant is viable, bni1 bnr1 double deletion mutants are temperature sensitive and are deficient in bud emergence, exhibit a random distribution of cortical actin patches and often become multinucleate at the restrictive temperature; rho1 bni1 double mutants exhibit synthetic lethality |
| YLL021W        | [SPA2] Component of the polarisome, which functions in actin cytoskeletal organization during polarized growth; acts as a scaffold for Mkk1p and Mpk1p cell wall integrity signaling components; potential Cdc28p substrate impaired ability to form shmoo, do not mate well with other spa2 mutants                                                                                                                                                                                                                                                                            |
| YOL112W        | [MSB4] GTPase-activating protein of the Ras superfamily that acts primarily on Sec4p, localizes to the bud site and bud tip, has similarity to Msb3p; msb3 msb4 double mutation causes defects in secretion and actin organization Null mutant is viable. msb3/msb4 double mutant exhibits slow growth and disorganized actin cytoskeleton                                                                                                                                                                                                                                      |
| YER149C        | [PEA2] Coiled-coil polarisome protein required for polarized morphogenesis, cell fusion, and low affinity Ca <sup>2+</sup> influx; forms polarisome complex with Bni1p, Bud6p, and Spa2p; localizes to sites of polarized growth coiled-coil domain Null mutant is viable, exhibits defects in mating that subtly affect mating efficiency; pea2 mutants form bilobed, peanut-like shapes when treated with pheromone, such that they can mate with wild-type but not a mating-enfeeble partner                                                                                 |
| <b>YLR319C</b> | [BUD6] Actin- and formin-interacting protein, involved in actin cable nucleation and polarized cell growth; isolated as bipolar budding mutant; potential Cdc28p substrate Null mutant is viable; mutants exhibit severe disruption of the actin cytoskeleton; deletion strains have a depolarized cytoskeleton, mitotic delay, and probable cytokinesis defects                                                                                                                                                                                                                |
| 0445           | GO_TERM:[transferase activity] P-Value:5.1e-02                                                                                                                                                                                                                                                                                                                                                                                                                                                                                                                                  |
| YML083C        |                                                                                                                                                                                                                                                                                                                                                                                                                                                                                                                                                                                 |
| YIL014W        | [MNT3] Alpha-1,3-mannosyltransferase, adds the fourth and fifth alpha-1,3-linked mannose residues to O-linked glycans during protein O-glycosylation alpha-1,3-mannosyltransferase                                                                                                                                                                                                                                                                                                                                                                                              |

|                         |                                                                                                                                                                                                                                                                                                                                                                                                                                |
|-------------------------|--------------------------------------------------------------------------------------------------------------------------------------------------------------------------------------------------------------------------------------------------------------------------------------------------------------------------------------------------------------------------------------------------------------------------------|
| YOR231W                 | [MKK1] Mitogen-activated kinase kinase involved in protein kinase C signaling pathway that controls cell integrity; upon activation by Bck1p phosphorylates downstream target, Slt2p; functionally redundant with Mkk2p MAP kinase kinase (MEK) Null mutant is viable but cannot grow on glycerol, is sensitive to nitrogen starvation, and cannot grow at elevated temperatures unless supplemented with sorbitol.            |
| 0446                    | GO_TERM:[aromatic compound metabolism] P-Value:7.3e-03                                                                                                                                                                                                                                                                                                                                                                         |
| YGR254W                 | [ENO1] Enolase I, a phosphopyruvate hydratase that catalyzes the conversion of 2-phosphoglycerate to phosphoenolpyruvate during glycolysis and the reverse reaction during gluconeogenesis; expression is repressed in response to glucose enolase I                                                                                                                                                                           |
| YBR166C                 | [TYR1] Prephenate dehydrogenase involved in tyrosine biosynthesis, expression is dependent on phenylalanine levels prephenate dehydrogenase (NADP+) tyrosine-requiring                                                                                                                                                                                                                                                         |
| YMR113W                 | [FOL3] Dihydrofolate synthetase, involved in folic acid biosynthesis; catalyzes the conversion of dihydropteroate to dihydrofolate in folate coenzyme biosynthesis dihydrofolate synthetase Null mutant is viable; requires folinic acid for growth                                                                                                                                                                            |
| YBL105C                 | [PKC1] Protein serine/threonine kinase essential for cell wall remodeling during growth; localized to sites of polarized growth and the mother-daughter bud neck; homolog of the alpha, beta, and gamma isoforms of mammalian protein kinase C (PKC) The null mutant is inviable and lyses rapidly in hypotonic media. Cells lacking PKC1 arrest growth with small buds at a point after DNA replication but prior to mitosis. |
| YGR221C                 | [TOS2] Protein involved in localization of Cdc24p to the site of bud growth; may act as a membrane anchor; localizes to the bud neck and bud tip; potentially phosphorylated by Cdc28p                                                                                                                                                                                                                                         |
| 0447                    | GO_TERM:[nucleobase, nucleoside, nucleotide and nucleic acid metabolism] P-Value:1.1e-01 OVERLAP:[F0/F1 ATP synthase (complex V)] <420.50> SIZE:18                                                                                                                                                                                                                                                                             |
| <a href="#">YDL004W</a> | [ATP16] Delta subunit of the central stalk of mitochondrial F1F0 ATP synthase, which is a large, evolutionarily conserved enzyme complex required for ATP synthesis ATP synthase delta subunit cells are entirely cytoplasmic petite                                                                                                                                                                                           |
| Q0120                   | [B14] Mitochondrial mRNA maturase, forms a complex with Nam2p to mediate splicing of the b14 intron of the COB gene; encoded by both exon and intron sequences of partially processed COB mRNA mitochondrial mRNA maturase b14                                                                                                                                                                                                 |
| YPL160W                 | [CDC60] Cytosolic leucyl tRNA synthetase, ligates leucine to the appropriate tRNA leucine--tRNA ligase arrest at START point of cell cycle upon shift to restrictive temperature                                                                                                                                                                                                                                               |
| 0448                    | GO_TERM:[biological_process] P-Value:9.2e-02                                                                                                                                                                                                                                                                                                                                                                                   |
| YGR058W                 |                                                                                                                                                                                                                                                                                                                                                                                                                                |
| YGR136W                 | [LSB1] Protein containing an N-terminal SH3 domain; binds Las17p, which is a homolog of human Wiskott-Aldrich Syndrome protein involved in actin patch assembly and actin polymerization                                                                                                                                                                                                                                       |
| YFL012W                 |                                                                                                                                                                                                                                                                                                                                                                                                                                |
| YPL111W                 | [CAR1] Arginase, responsible for arginine degradation, expression responds to both induction by arginine and nitrogen catabolite repression; disruption enhances freeze tolerance arginase Null mutant is viable but defective in arginine catabolism                                                                                                                                                                          |
| 0449                    |                                                                                                                                                                                                                                                                                                                                                                                                                                |
| YKL150W                 | [MCR1] Mitochondrial NADH-cytochrome b5 reductase, involved in ergosterol biosynthesis NADH-cytochrome b5 reductase                                                                                                                                                                                                                                                                                                            |
| YPR154W                 | [PIN3] Protein that induces appearance of [PIN+] prion when overproduced Other phenotypes: overexpression of PIN3 allows for the induction of the [PSI+] prion in strains cured of [PIN+].                                                                                                                                                                                                                                     |
| 0450                    | GO_TERM:[G2/M-specific transcription in mitotic cell cycle] P-Value:1.0e-04 OVERLAP:[other respiration chain complexes] <420.60> SIZE:14                                                                                                                                                                                                                                                                                       |
| YDL203C                 | [YDL203C] Hypothetical protein a TRP/SEL-1 domain containing protein                                                                                                                                                                                                                                                                                                                                                           |
| YNL068C                 | [FKH2] Transcription factor of the forkhead family that regulates the cell cycle and pseudohyphal growth; also involved in chromatin silencing at HML and HMR; potential Cdc28p substrate forkhead protein                                                                                                                                                                                                                     |
| YOR372C                 | [NDD1] Transcriptional activator essential for nuclear division; localized to the nucleus; essential component of the mechanism that activates the expression of a set of late-S-phase-specific genes Null mutant is inviable and arrests prior to nuclear division but after DNA replication; cells are large budded with short mitotic spindles.                                                                             |
| <a href="#">YGR207C</a> |                                                                                                                                                                                                                                                                                                                                                                                                                                |
| YNL254C                 |                                                                                                                                                                                                                                                                                                                                                                                                                                |
| YIL108W                 |                                                                                                                                                                                                                                                                                                                                                                                                                                |
| YOR032C                 | [HMS1] Basic helix-loop-helix (bHLH) protein with similarity to myc-family transcription factors; overexpression confers hyperfilamentous growth and suppresses the pseudohyphal filamentation defect of a diploid mep1 mep2 homozygous null mutant myc-family transcription factor homolog Null mutant is viable; multicopy expression suppresses the pseudohyphal defect of mep2/mep2 strains                                |
| 0451                    | GO_TERM:[meiotic chromosome segregation] P-Value:3.5e-06                                                                                                                                                                                                                                                                                                                                                                       |
| YKL077W                 |                                                                                                                                                                                                                                                                                                                                                                                                                                |

|                |                                                                                                                                                                                                                                                                                                                                                                                                                |
|----------------|----------------------------------------------------------------------------------------------------------------------------------------------------------------------------------------------------------------------------------------------------------------------------------------------------------------------------------------------------------------------------------------------------------------|
| YDR439W        | [LRS4] Protein involved in rDNA silencing; positively charged coiled-coil protein with limited similarity to myosin loses rDNA silencing                                                                                                                                                                                                                                                                       |
| YER106W        | [MAM1] Monopolin, kinetochore associated protein involved in chromosome attachment to meiotic spindle Monopolin Null: Null mutant is viable; sister kinetochores orient towards opposite spindle poles in meiosis I (as opposed to wt where homologous kinetochores orient towards the opposite spindle poles and sister kinetochores orient towards the same spindle pole)                                    |
| YGL175C        | [SAE2] Protein with a role in accurate meiotic and mitotic double-strand break repair; phosphorylated in response to DNA damage and required for normal resistance to DNA-damaging agents Null mutant is viable, weakly sensitive to methyl methane sulfonate, shows blocked turnover of meiosis-specific double-strand breaks, similar to rad50S mutant                                                       |
| YCR086W        | [CSM1] Nucleolar protein that forms a complex with Lrs4p which binds Mam1p at kinetochores during meiosis I to mediate accurate chromosome segregation, may be involved in premeiotic DNA replication; possible role in telomere maintenance                                                                                                                                                                   |
| YPL109C        |                                                                                                                                                                                                                                                                                                                                                                                                                |
| 0452           | GO_TERM:[regulation of glycogen catabolism] P-Value:1.2e-04                                                                                                                                                                                                                                                                                                                                                    |
| YER156C        |                                                                                                                                                                                                                                                                                                                                                                                                                |
| YDL224C        | [WHI4] Putative RNA binding protein and partially redundant Whi3p homolog that regulates the cell size requirement for passage through Start and commitment to cell division RNA binding protein (putative)WHI3 homolog Null mutant increases severity of the Whi phenotype of whi3.                                                                                                                           |
| YER059W        | [PCL6] Pho85p cyclin of the Pho80p subfamily; forms the major Glc8p kinase together with Pcl7p and Pho85p; involved in the control of glycogen storage by Pho85p; stabilized by Elongin C binding Null mutant is viable. A Ty insertion mutant exhibits slow growth.                                                                                                                                           |
| YIL050W        | [PCL7] Pho85p cyclin of the Pho80p subfamily, forms a functional kinase complex with Pho85p which phosphorylates Mmr1p and is regulated by Pho81p; involved in glycogen metabolism, expression is cell-cycle regulated cyclin                                                                                                                                                                                  |
| YLR190W        | [MMR1] Phosphorylated protein of the mitochondrial outer membrane, localizes only to mitochondria of the bud; interacts with Myo2p to mediate mitochondrial distribution to buds; mRNA is targeted to the bud via the transport system involving She2p                                                                                                                                                         |
| 0453           | GO_TERM:[transcription regulator activity] P-Value:1.2e-06 OVERLAP:[SBF complex] <510.190.60> SIZE:2                                                                                                                                                                                                                                                                                                           |
| YDL056W        | [MBP1] Transcription factor involved in regulation of cell cycle progression from G1 to S phase, forms a complex with Swi6p that binds to MluI cell cycle box regulatory element in promoters of DNA synthesis genes transcription factor                                                                                                                                                                      |
| YNR009W        | [NRM1] Putative transcriptional repressor of MBF (MCB binding factor) target genes                                                                                                                                                                                                                                                                                                                             |
| <b>YLR182W</b> | [SWI6] Transcription cofactor, forms complexes with DNA-binding proteins Swi4p and Mbp1p to regulate transcription at the G1/S transition; involved in meiotic gene expression; localization regulated by phosphorylation; potential Cdc28p substrate transcription factor Null mutant is viable and deficient in homothallic switching                                                                        |
| <b>YER111C</b> | [SWI4] DNA binding component of the SBF complex (Swi4p-Swi6p), a transcriptional activator that in concert with MBF (Mbp1-Swi6p) regulates late G1-specific transcription of targets including cyclins and genes required for DNA synthesis and repair transcription factor Null mutant is viable, deficient in homothallic switching, and temperature sensitive                                               |
| YOR083W        | [WHI5] Protein that regulates the critical cell size required for passage through Start and commitment to cell division; may act upstream of SCB binding factor (SBF) and MCB binding factor (MBF); periodically expressed in G1 function unknown Null: small critical cell size                                                                                                                               |
| 0454           | GO_TERM:[protein kinase regulator activity] P-Value:6.2e-04 OVERLAP:[Cdc28p complexes] <133.10> SIZE:10                                                                                                                                                                                                                                                                                                        |
| YEL016C        | [NPP2] Nucleotide pyrophosphatase/phosphodiesterase family member; mediates extracellular nucleotide phosphate hydrolysis along with Npp1p and Pho5p; activity and expression enhanced during conditions of phosphate starvation nucleotide phosphatase                                                                                                                                                        |
| YJL157C        | [FAR1] Cyclin-dependent kinase inhibitor that mediates cell cycle arrest in response to pheromone; also forms a complex with Cdc24p, Ste4p, and Ste18p that may specify the direction of polarized growth during mating; potential Cdc28p substrate Cdc28p kinase inhibitor                                                                                                                                    |
| <b>YAL040C</b> | [CLN3] G1 cyclin involved in cell cycle progression; activates Cdc28p kinase to promote the G1 to S phase transition; plays a role in regulating transcription of the other G1 cyclins, CLN1 and CLN2; regulated by phosphorylation and proteolysis G1 cyclin Null mutant is viable; dominant mutation causes alpha-factor resistance and small cell size; chromosomal deletion increases cell volume          |
| YNL197C        | [WHI3] RNA binding protein that binds to and sequesters the G1 cyclin CLN3 mRNA; regulates cell fate and dose-dependently inhibits passage through Start by regulating the critical cell size requirement necessary for cell cycle progression RNA binding protein (putative) Null mutant is viable and defective in filamentous growth                                                                        |
| 0455           | GO_TERM:[regulation of catalytic activity] P-Value:7.5e-09 OVERLAP:[Cdc28p complexes] <133.10> SIZE:10                                                                                                                                                                                                                                                                                                         |
| YLR079W        | [SIC1] Inhibitor of Cdc28-Clb kinase complexes that controls G1/S phase transition, preventing premature S phase and ensuring genomic integrity; phosphorylation targets Sic1p for SCF(CDC4)-dependent turnover; functional homolog of mammalian Kip1 Null mutant is viable, shows increased frequency of broken and lost chromosomes; sic1 deletion mutant rescues lethality of cln1 cln2 cln3 triple mutant. |
| <b>YMR199W</b> | [CLN1] G1 cyclin involved in regulation of the cell cycle; activates Cdc28p kinase to promote the G1 to S phase transition; late G1 specific expression depends on transcription factor complexes, MBF (Swi6p-Mbp1p) and SBF (Swi6p-Swi4p) G1 cyclin Null mutant is viable, exhibits G1 arrest                                                                                                                 |
| <b>YDL155W</b> | [CLB3] B-type cyclin involved in cell cycle progression; activates Cdc28p to promote the G2/M transition; may be involved in DNA replication and spindle assembly; accumulates during S phase and G2, then targeted for ubiquitin-mediated degradation B-type cyclin                                                                                                                                           |

|                |                                                                                                                                                                                                                                                                                                                                                                                                                                                                                                                                                                                                                                                                                                                                          |
|----------------|------------------------------------------------------------------------------------------------------------------------------------------------------------------------------------------------------------------------------------------------------------------------------------------------------------------------------------------------------------------------------------------------------------------------------------------------------------------------------------------------------------------------------------------------------------------------------------------------------------------------------------------------------------------------------------------------------------------------------------------|
| YPL267W        | [ACM1] Protein of unknown function, potential Cdc28p substrate                                                                                                                                                                                                                                                                                                                                                                                                                                                                                                                                                                                                                                                                           |
| 0456           | GO_TERM:[protein kinase regulator activity] P-Value:1.4e-03 OVERLAP:[Sin3 complex] <510.190.150> SIZE:4                                                                                                                                                                                                                                                                                                                                                                                                                                                                                                                                                                                                                                  |
| YKR091W        | [SRL3] Cytoplasmic protein that, when overexpressed, suppresses the lethality of a rad53 null mutation; potential Cdc28p substrate                                                                                                                                                                                                                                                                                                                                                                                                                                                                                                                                                                                                       |
| <b>YNL309W</b> | [STB1] Protein with a role in regulation of MBF-specific transcription at Start, phosphorylated by Cln-Cdc28p kinases in vitro; unphosphorylated form binds Swi6p and binding is required for Stb1p function; expression is cell-cycle regulated                                                                                                                                                                                                                                                                                                                                                                                                                                                                                         |
| YPL256C        | [CLN2] G1 cyclin involved in regulation of the cell cycle; activates Cdc28p kinase to promote the G1 to S phase transition; late G1 specific expression depends on transcription factor complexes, MBF (Swi6p-Mbp1p) and SBF (Swi6p-Swi4p) G1 cyclin Null mutant is viable, exhibits G1 arrest; dominant mutation advances the G(sub)1- to S- phase transition and impairs ability of cells to arrest in G(sub)1 phase in response to external signals                                                                                                                                                                                                                                                                                   |
| YBR135W        | [CKS1] Subunit of the Cdc28 protein kinase, required for mitotic proteolysis, may also be involved in the proteolysis of the G1 cyclins Cdc28 protein kinase subunit Null mutant is inviable and arrests in G1.                                                                                                                                                                                                                                                                                                                                                                                                                                                                                                                          |
| YPL014W        |                                                                                                                                                                                                                                                                                                                                                                                                                                                                                                                                                                                                                                                                                                                                          |
| 0457           | GO_TERM:[anaphase-promoting complex] P-Value:1.4e-45 OVERLAP:[Anaphase promoting complex (APC)] <60> SIZE:11                                                                                                                                                                                                                                                                                                                                                                                                                                                                                                                                                                                                                             |
| YDR113C        | [PDS1] Securin that inhibits anaphase by binding separin Esp1p, also blocks cyclin destruction and mitotic exit, essential for cell cycle arrest in mitosis in the presence of DNA damage or aberrant mitotic spindles; also present in meiotic nuclei 42 kDa nuclear securin Null mutant is viable but is temperature-sensitive; shows higher rates of chromosome loss at permissive temperature; at restrictive temperature, fails to elongate spindles and shows uncoupling of cell cycle progression from completion of anaphase                                                                                                                                                                                                     |
| YGR225W        | [AMA1] Activator of meiotic anaphase promoting complex (APC/C); Cdc20p family member; required for initiation of spore wall assembly; required for Clb1p degradation during meiosis Null mutant is viable; homozygous null mutant does not sporulate but does not exhibit any vegetative phenotype.                                                                                                                                                                                                                                                                                                                                                                                                                                      |
| YMR001C        | [CDC5] Polo-like kinase with similarity to Xenopus Plx1 and S. pombe Plo1p; found at bud neck, nucleus and SPBs; has multiple functions in mitosis and cytokinesis through phosphorylation of substrates; may be a Cdc28p substrate protein kinase Null mutant is inviable. cdc5(ts) mutants form synaptonemal complexes lacking central elements and arrest either at meiosis I with broken spindles or at meiosis II with short spindles. Late shifts to a restrictive temperature result in reductional dyads; each spore contains an entire meiosis II short spindle with unseparated chromatids. In some strains at semi-permissive temperature, chromosomes segregate reductionally or equationally depending upon the centromere. |
| YGL116W        | [CDC20] Cell-cycle regulated activator of anaphase-promoting complex/cyclosome (APC/C), which is required for metaphase/anaphase transition; directs ubiquitination of mitotic cyclins, Pds1p, and other anaphase inhibitors; potential Cdc28p substrate anaphase promoting complex (APC) subunit Null mutant is inviable; conditional alleles show cell cycle arrest in G2                                                                                                                                                                                                                                                                                                                                                              |
| YGL003C        | [CDH1] Cell-cycle regulated activator of the anaphase-promoting complex/cyclosome (APC/C), which directs ubiquitination of mitotic cyclins resulting in exit from mitosis; targets the APC/C to specific substrates including CDC20, ASE1 and CIN8 required for Clb2 and Ase1 degradation Null mutant is viable but defective in Clb2p and Ase1p degradation; deletion of cdh1 causes pheromone resistance and is synthetically lethal with sic1 deletion; overexpression causes ectopic degradation of Clb2p and Ase1p                                                                                                                                                                                                                  |
| <b>YFR036W</b> | [CDC26] Subunit of the Anaphase-Promoting Complex/Cyclosome (APC/C), which is a ubiquitin-protein ligase required for degradation of anaphase inhibitors, including mitotic cyclins, during the metaphase/anaphase transition thermosensitive cell growth (lethal at high temperature)                                                                                                                                                                                                                                                                                                                                                                                                                                                   |
| <b>YLR102C</b> | [APC9] Subunit of the Anaphase-Promoting Complex/Cyclosome (APC/C), which is a ubiquitin-protein ligase required for degradation of anaphase inhibitors, including mitotic cyclins, during the metaphase/anaphase transition anaphase promoting complex (APC) subunit Null mutant is viable at 37 C but show delay in entry into anaphase at 37 C                                                                                                                                                                                                                                                                                                                                                                                        |
| YDR260C        | [SWM1] Subunit of the anaphase-promoting complex, which is an E3 ubiquitin ligase that regulates the metaphase-anaphase transition and exit from mitosis; required for activation of the daughter-specific gene expression and spore wall maturation Null mutant completes meiotic nuclear division but does not show spore wall maturation                                                                                                                                                                                                                                                                                                                                                                                              |
| <b>YOR249C</b> | [APC5] Subunit of the Anaphase-Promoting Complex/Cyclosome (APC/C), which is a ubiquitin-protein ligase required for degradation of anaphase inhibitors, including mitotic cyclins, during the metaphase/anaphase transition anaphase promoting complex (APC) subunit Null mutant is inviable at 25 C                                                                                                                                                                                                                                                                                                                                                                                                                                    |
| <b>YBL084C</b> | [CDC27] Subunit of the Anaphase-Promoting Complex/Cyclosome (APC/C), which is a ubiquitin-protein ligase required for degradation of anaphase inhibitors, including mitotic cyclins, during the metaphase/anaphase transition anaphase promoting complex (APC) subunit Null mutant is inviable. Some conditional alleles overreplicate their DNA.                                                                                                                                                                                                                                                                                                                                                                                        |
| <b>YHR166C</b> | [CDC23] Subunit of the anaphase-promoting complex/cyclosome (APC/C), which is a ubiquitin-protein ligase required for degradation of anaphase inhibitors, including mitotic cyclins, during the metaphase/anaphase transition unable to complete G(sub)2/M transition                                                                                                                                                                                                                                                                                                                                                                                                                                                                    |
| <b>YKL022C</b> | [CDC16] Subunit of the anaphase-promoting complex/cyclosome (APC/C), which is a ubiquitin-protein ligase required for degradation of anaphase inhibitors, including mitotic cyclins, during the metaphase/anaphase transition; required for sporulation metal-binding nucleic acid-binding protein, interacts with Cdc23p and Cdc27p to catalyze the conjugation of ubiquitin to cyclin B (putative) Null mutant is inviable; sensitive to caffeine; cdc16 mutants are unable to progress through the G(sub)2/M transition, cell division cycle blocked at 36 degrees C                                                                                                                                                                  |
| <b>YLR127C</b> | [APC2] Subunit of the Anaphase-Promoting Complex/Cyclosome (APC/C), which is a ubiquitin-protein ligase required for degradation of anaphase inhibitors, including mitotic cyclins, during the metaphase/anaphase transition; similar to cullin Cdc53p anaphase promoting complex (APC) subunit Null mutant is inviable at 25 deg. C; ts mutants arrest in metaphase due to defect in the degradation of Pds1; extracts from G1-arrested apc2 mutants are defective in the ubiquitination of mitotic cyclins                                                                                                                                                                                                                             |
| <b>YNL172W</b> | [APC1] Largest subunit of the Anaphase-Promoting Complex/Cyclosome (APC/C), which is a ubiquitin-protein ligase required for degradation of anaphase inhibitors, including mitotic cyclins, during the metaphase/anaphase transition ubiquitin ligase subunit                                                                                                                                                                                                                                                                                                                                                                                                                                                                            |
| <b>YDL008W</b> | [APC11] Catalytic core subunit of the Anaphase-Promoting Complex/Cyclosome (APC/C), which is a ubiquitin-protein ligase required for degradation of anaphase inhibitors, including mitotic cyclins, during the metaphase/anaphase transition anaphase promoting complex (APC) subunit Null mutant is inviable at 25 C                                                                                                                                                                                                                                                                                                                                                                                                                    |

|         |                                                                                                                                                                                                                                                                                                                                                                                                                                                                                                                                                                                                                                                                                                                                                     |
|---------|-----------------------------------------------------------------------------------------------------------------------------------------------------------------------------------------------------------------------------------------------------------------------------------------------------------------------------------------------------------------------------------------------------------------------------------------------------------------------------------------------------------------------------------------------------------------------------------------------------------------------------------------------------------------------------------------------------------------------------------------------------|
| YIR025W | [MND2] Subunit of the anaphase-promoting complex (APC); needed for meiotic nuclear division arrests after DNA-replication but before nuclear divisions after shift to sporulation medium                                                                                                                                                                                                                                                                                                                                                                                                                                                                                                                                                            |
| YDR118W | [APC4] Subunit of the Anaphase-Promoting Complex/Cyclosome (APC/C), which is a ubiquitin-protein ligase required for degradation of anaphase inhibitors, including mitotic cyclins, during the metaphase/anaphase transition anaphase promoting complex (APC) subunit Null mutant is inviable at 25 C                                                                                                                                                                                                                                                                                                                                                                                                                                               |
| YGL240W | [DOC1] Processivity factor required for the ubiquitination activity of the anaphase promoting complex (APC), mediates the activity of the APC by contributing to substrate recognition; involved in cyclin proteolysis                                                                                                                                                                                                                                                                                                                                                                                                                                                                                                                              |
| 0458    | GO_TERM:[negative regulation of exit from mitosis] P-Value:4.3e-05 OVERLAP:[Kel1p/Kel2p complex] <265> SIZE:2                                                                                                                                                                                                                                                                                                                                                                                                                                                                                                                                                                                                                                       |
| YDR151C | [CTH1] Member of the CCCH zinc finger family; has similarity to mammalian Tis11 protein, which activates transcription and also has a role in mRNA degradation; may function with Tis11p in iron homeostasis CCCH zinc finger protein family that has two or more repeats of a novel zinc finger motif consisting of Cys and His residues in the form Cx8Cx5Cx3H [where x is a variable amino acid (aa)] Null mutant is viable, displays a threefold increase in CTH2 mRNA accumulation. CTH1 overexpression causes delayed entry of cell cultures into exponential growth, and a decrease in final cell density. Removal of the zinc finger domain of Cth1p by truncation or deletion completely reverses the overexpression slow growth phenotype |
| YLR096W | [KIN2] Serine/threonine protein kinase involved in regulation of exocytosis; localizes to the cytoplasmic face of the plasma membrane; closely related to Kin1p                                                                                                                                                                                                                                                                                                                                                                                                                                                                                                                                                                                     |
| YER184C |                                                                                                                                                                                                                                                                                                                                                                                                                                                                                                                                                                                                                                                                                                                                                     |
| YJR122W | [CAF17] Mitochondrial protein that interacts with Ccr4p in the two-hybrid system; 3'-untranslated region contains a putative mRNA localization element common to genes encoding mitochondrial proteins Null mutant is viable, shows petite phenotype                                                                                                                                                                                                                                                                                                                                                                                                                                                                                                |
| YGR238C | [KEL2] Protein that functions in a complex with Kel1p to negatively regulate mitotic exit, interacts with Tem1p and Lte1p; localizes to regions of polarized growth; potential Cdc28p substrate                                                                                                                                                                                                                                                                                                                                                                                                                                                                                                                                                     |
| YHR158C | [KEL1] Protein required for proper cell fusion and cell morphology; functions in a complex with Kel2p to negatively regulate mitotic exit, interacts with Tem1p and Lte1p; localizes to regions of polarized growth; potential Cdc28p substrate The null mutant is viable but shows a moderate defect in cell fusion during mating.                                                                                                                                                                                                                                                                                                                                                                                                                 |
| 0459    | GO_TERM:[cellular_component] P-Value:5.8e-02                                                                                                                                                                                                                                                                                                                                                                                                                                                                                                                                                                                                                                                                                                        |
| YCR091W | [KIN82] Putative serine/threonine protein kinase, most similar to cyclic nucleotide-dependent protein kinase subfamily and the protein kinase C subfamily serine/threonine kinase (putative)similar to cyclic nucleotide-dependent protein kinase subfamily and the protein kinase C subfamily                                                                                                                                                                                                                                                                                                                                                                                                                                                      |
| YDL038C |                                                                                                                                                                                                                                                                                                                                                                                                                                                                                                                                                                                                                                                                                                                                                     |
| 0460    | GO_TERM:[cellular_process] P-Value:4.2e-01                                                                                                                                                                                                                                                                                                                                                                                                                                                                                                                                                                                                                                                                                                          |
| YDL214C | [PRR2] Protein kinase with a possible role in MAP kinase signaling in the pheromone response pathway protein kinase                                                                                                                                                                                                                                                                                                                                                                                                                                                                                                                                                                                                                                 |
| YJL198W | [PHO90] Low-affinity phosphate transporter; deletion of pho84, pho87, pho89, pho90, and pho91 causes synthetic lethality; transcription independent of Pi and Pho4p activity; overexpression results in vigorous growth                                                                                                                                                                                                                                                                                                                                                                                                                                                                                                                             |
| 0461    | GO_TERM:[cellular_component] P-Value:5.8e-02                                                                                                                                                                                                                                                                                                                                                                                                                                                                                                                                                                                                                                                                                                        |
| YGL235W |                                                                                                                                                                                                                                                                                                                                                                                                                                                                                                                                                                                                                                                                                                                                                     |
| YLR407W |                                                                                                                                                                                                                                                                                                                                                                                                                                                                                                                                                                                                                                                                                                                                                     |
| 0462    | GO_TERM:[biological_process] P-Value:9.6e-02                                                                                                                                                                                                                                                                                                                                                                                                                                                                                                                                                                                                                                                                                                        |
| YBR138C |                                                                                                                                                                                                                                                                                                                                                                                                                                                                                                                                                                                                                                                                                                                                                     |
| YGR223C | [HSV2] Phosphatidylinositol 3,5-bisphosphate-binding protein, predicted to fold as a seven-bladed beta-propeller; displays punctate cytoplasmic localization                                                                                                                                                                                                                                                                                                                                                                                                                                                                                                                                                                                        |
| 0463    | GO_TERM:[interphase] P-Value:7.7e-04 OVERLAP:[Cdc28p complexes] <133.10> SIZE:10                                                                                                                                                                                                                                                                                                                                                                                                                                                                                                                                                                                                                                                                    |
| YDR501W | [PLM2] Protein required for partitioning of the 2-micron plasmid Null mutant is viable and shows 2mu-m plasmid instability                                                                                                                                                                                                                                                                                                                                                                                                                                                                                                                                                                                                                          |
| YKR078W |                                                                                                                                                                                                                                                                                                                                                                                                                                                                                                                                                                                                                                                                                                                                                     |
| YCL051W | [LRE1] Protein involved in control of cell wall structure and stress response; inhibits Cbk1p protein kinase activity; overproduction confers resistance to cell-wall degrading enzymes Null mutant is viable; overexpression of both LRE1 and PBN1 confers resistance to laminarinase, which specifically degrades cell wall beta(1,3) glucan linkages                                                                                                                                                                                                                                                                                                                                                                                             |
| YLR219W | [MSC3] Protein of unknown function, green fluorescent protein (GFP)-fusion protein localizes to the cell periphery; msc3 mutants are defective in directing meiotic recombination events to homologous chromatids; potential Cdc28p substrate                                                                                                                                                                                                                                                                                                                                                                                                                                                                                                       |
| YOL058W | [ARG1] Argininosuccinate synthetase, catalyzes the formation of L-argininosuccinate from citrulline and L-aspartate in the arginine biosynthesis pathway; potential Cdc28p substrate argininosuccinate synthetase Arginine requires                                                                                                                                                                                                                                                                                                                                                                                                                                                                                                                 |

|                |                                                                                                                                                                                                                                                                                                                                                                                                                                                                                                                    |
|----------------|--------------------------------------------------------------------------------------------------------------------------------------------------------------------------------------------------------------------------------------------------------------------------------------------------------------------------------------------------------------------------------------------------------------------------------------------------------------------------------------------------------------------|
|                | pathway; potential Cdc28p substrate arginosuccinate synthetase Arginine requiring                                                                                                                                                                                                                                                                                                                                                                                                                                  |
| YOR104W        | [PIN2] Protein that induces appearance of [PIN+] prion when overproduced Other phenotypes: overexpression of PIN2 allows for the induction of the [PSI+] prion by Sup35p overproduction in strains cured of [PIN+].                                                                                                                                                                                                                                                                                                |
| YFR046C        | [CNN1] Kinetochore protein of unknown function; associated with the essential kinetochore proteins Nnf1p and Spc24p; phosphorylated by both Clb5-Cdk1 and, to a lesser extent, Clb2-Cdk1. kinetochore protein                                                                                                                                                                                                                                                                                                      |
| YGR296W        | [YRF1-3] Helicase encoded by the Y' element of subtelomeric regions, highly expressed in the mutants lacking the telomerase component TLC1; potentially phosphorylated by Cdc28p Y'-helicase protein 1                                                                                                                                                                                                                                                                                                             |
| YKL043W        | [PHD1] Transcriptional activator that enhances pseudohyphal growth; regulates expression of FLO11, an adhesin required for pseudohyphal filament formation; similar to StuA, an A. nidulans developmental regulator; potential Cdc28p substrate transcription factor (putative) Null mutant is viable, diploid homozygous null mutants undergo pseudohyphal growth when starved for nitrogen. Overexpression of PHD1 in diploids and in bud4 haploids causes precocious and unusually vigorous pseudohyphal growth |
| YDL189W        | [RBS1] Protein of unknown function, identified as a high copy suppressor of psk1 psk2 mutations that confer temperature-sensitivity for galactose utilization; proposed to bind single-stranded nucleic acids via its R3H domain R3H-domain protein                                                                                                                                                                                                                                                                |
| YNL257C        | [SIP3] Protein that activates transcription through interaction with DNA-bound Snf1p, C-terminal region has a putative leucine zipper motif; potential Cdc28p substrate transcriptional activator (putative) Null mutant is viable; does not confer snf1 phenotypes                                                                                                                                                                                                                                                |
| YIL122W        | [POG1] Putative transcriptional activator that promotes recovery from pheromone induced arrest; inhibits both alpha-factor induced G1 arrest and repression of CLN1 and CLN2 via SCB/MCB promoter elements; potential Cdc28p substrate; SBF regulated transcription factor (putative)                                                                                                                                                                                                                              |
| YDR389W        | [SAC7] GTPase activating protein (GAP) for Rho1p, involved in signaling to the actin cytoskeleton, null mutations suppress tor2 mutations and temperature sensitive mutations in actin; potential Cdc28p substrate GTPase activating protein (GAP) for RHO1 null mutant is viable, has growth and actin assembly defects at low temperatures, displays allele-specific suppression and double mutant lethality with actin mutations, suppresses tor mutations                                                      |
| YIL031W        | [ULP2] Peptidase that deconjugates Smt3/SUMO-1 peptides from proteins, plays a role in chromosome cohesion at centromeric regions and recovery from checkpoint arrest induced by DNA damage or DNA replication defects; potential Cdc28p substrate                                                                                                                                                                                                                                                                 |
| YAL028W        | [FRT2] Tail-anchored endoplasmic reticulum membrane protein, interacts with homolog Frt1p but is not a substrate of calcineurin (unlike Frt1p), promotes growth in conditions of high Na+, alkaline pH, or cell wall stress; potential Cdc28p substrate                                                                                                                                                                                                                                                            |
| YJR054W        |                                                                                                                                                                                                                                                                                                                                                                                                                                                                                                                    |
| YHL050C        |                                                                                                                                                                                                                                                                                                                                                                                                                                                                                                                    |
| YNL339C        | [YRF1-6] Helicase encoded by the Y' element of subtelomeric regions, highly expressed in the mutants lacking the telomerase component TLC1; potentially phosphorylated by Cdc28p Y'-helicase protein 1                                                                                                                                                                                                                                                                                                             |
| YPL250C        | [ICY2] Protein of unknown function; potential Cdc28p substrate                                                                                                                                                                                                                                                                                                                                                                                                                                                     |
| YBL013W        | [FMT1] Methionyl-tRNA formyltransferase, catalyzes the formylation of initiator Met-tRNA in mitochondria; potential Cdc28p substrate methionyl-tRNA transformylase Null mutant is viable and lacks mitochondrial formyl-Met-tRNA                                                                                                                                                                                                                                                                                   |
| YNR047W        |                                                                                                                                                                                                                                                                                                                                                                                                                                                                                                                    |
| <b>YPR120C</b> | [CLB5] B-type cyclin involved in DNA replication during S phase; activates Cdc28p to promote initiation of DNA synthesis; functions in formation of mitotic spindles along with Clb3p and Clb4p; most abundant during late G1 phase B-type cyclin Null mutant is viable, but has an extended S phase                                                                                                                                                                                                               |
| <b>YBR160W</b> | [CDC28] Catalytic subunit of the main cell cycle cyclin-dependent kinase (CDK); alternately associates with G1 cyclins (CLNs) and G2/M cyclins (CLBs) which direct the CDK to specific substrates cyclin-dependent protein kinase arrests at G1/S transition <br> arrests at G2/M transition                                                                                                                                                                                                                       |
| <b>YPR119W</b> | [CLB2] B-type cyclin involved in cell cycle progression; activates Cdc28p to promote the transition from G2 to M phase; accumulates during G2 and M, then targeted via a destruction box motif for ubiquitin-mediated degradation by the proteasome B-type cyclin                                                                                                                                                                                                                                                  |
| 0464           | GO_TERM:[cytoplasmic part] P-Value:7.9e-01                                                                                                                                                                                                                                                                                                                                                                                                                                                                         |
| YDL135C        | [RDI1] Rho GDP dissociation inhibitor involved in the localization and regulation of Cdc42p                                                                                                                                                                                                                                                                                                                                                                                                                        |
| YNL176C        |                                                                                                                                                                                                                                                                                                                                                                                                                                                                                                                    |
| 0465           | GO_TERM:[mitochondrion] P-Value:3.6e-02                                                                                                                                                                                                                                                                                                                                                                                                                                                                            |
| YFR044C        |                                                                                                                                                                                                                                                                                                                                                                                                                                                                                                                    |
| YJR016C        | [ILV3] Dihydroxyacid dehydratase, catalyzes third step in the common pathway leading to biosynthesis of branched-chain amino acids dihydroxyacid dehydratase Null mutant is viable and requires isoleucine and valine                                                                                                                                                                                                                                                                                              |
| YPR165W        | [RHO1] GTP-binding protein of the rho subfamily of Ras-like proteins, involved in establishment of cell polarity; regulates protein kinase C (Pkc1p) and the cell wall synthesizing enzyme 1,3-beta-glucan synthase (Fks1p and Gsc2p) GTP-binding protein rho subfamily null is inviable; synthetic lethal with bem2                                                                                                                                                                                               |
| 0466           | GO_TERM:[heterotrimeric G-protein complex] P-Value:8.3e-06 OVERLAP:[Pheromone response pathway] <470.30.10> SIZE:3                                                                                                                                                                                                                                                                                                                                                                                                 |
| <b>YJR086W</b> | [STE18] G protein gamma subunit, forms a dimer with Ste4p to activate the mating signaling pathway, forms a heterotrimer with Gpa1p and Ste4p to dampen signaling; C-terminus is palmitoylated and farnesylated, which are required for normal signaling G protein gamma subunit coupled to mating factor receptor The null mutant is viable but sterile. Sst1 sst2 double mutants and seg1 mutants can be suppressed by a null allele of ste18.                                                                   |

|         |                                                                                                                                                                                                                                                                                                                                                                                                                                                                                                                                                                                                 |
|---------|-------------------------------------------------------------------------------------------------------------------------------------------------------------------------------------------------------------------------------------------------------------------------------------------------------------------------------------------------------------------------------------------------------------------------------------------------------------------------------------------------------------------------------------------------------------------------------------------------|
| YOR212W | [STE4] G protein beta subunit, forms a dimer with Ste18p to activate the mating signaling pathway, forms a heterotrimer with Gpa1p and Ste18p to dampen signaling; may recruit Rho1p to the polarized growth site during mating; contains WD40 repeats G protein beta subunit coupled to mating factor receptor                                                                                                                                                                                                                                                                                 |
| YAR061W |                                                                                                                                                                                                                                                                                                                                                                                                                                                                                                                                                                                                 |
| YMR182C | [RGM1] Putative transcriptional repressor with proline-rich zinc fingers; overproduction impairs cell growth transcriptional repressor with proline-rich zinc fingers (putative) Null mutant is viable; overexpression of RGM1 greatly impairs cell growth.                                                                                                                                                                                                                                                                                                                                     |
| 0467    | OVERLAP:[cytoplasmic ribosomal large subunit] <500.40.10> SIZE:81                                                                                                                                                                                                                                                                                                                                                                                                                                                                                                                               |
| YHR184W | [SSP1] Protein involved in the control of meiotic nuclear division and coordination of meiosis with spore formation; transcription is induced midway through meiosis Null mutant is viable; spo3-1 at a semi-permissive temperature produces asci with one or two randomly packaged haploid spores; at a restrictive temperature, prospore walls grow and close prior to the completion of meiosis II, resulting in immature aneuploid and/or anucleate spores. Multinucleate cells completing meiosis II, but blocked in spore development, bud and resume division in return to growth assay. |
| YLR185W | [RPL37A] Protein component of the large (60S) ribosomal subunit, has similarity to Rpl37Bp and to rat L37 ribosomal protein ribosomal protein L37A (L43) (YL35)                                                                                                                                                                                                                                                                                                                                                                                                                                 |
| 0468    | GO_TERM:[spindle] P-Value:2.2e-23                                                                                                                                                                                                                                                                                                                                                                                                                                                                                                                                                               |
| YLR392C |                                                                                                                                                                                                                                                                                                                                                                                                                                                                                                                                                                                                 |
| YLR457C | [NBP1] Spindle pole body (SPB) component, required for the insertion of the duplication plaque into the nuclear membrane during SPB duplication; essential for bipolar spindle formation; component of the Mps2p-Bbp1p complex                                                                                                                                                                                                                                                                                                                                                                  |
| YGL075C | [MPS2] Essential membrane protein localized at the nuclear envelope and spindle pole body (SPB), required for insertion of the newly duplicated SPB into the nuclear envelope; potentially phosphorylated by Cdc28p Null mutant is inviable, however some null spore clones can survive with abnormal ploidy; the mps2-1 mutant is incapable of proper duplication of the SPB, resulting in a defective pole that only nucleates cytoplasmic microtubules. Overexpression of MPS2 in a cim5-1 ts mutant is toxic to cells.                                                                      |
| YPL255W | [BBP1] Protein required for the spindle pole body (SPB) duplication, localized at the central plaque periphery; forms a complex with a nuclear envelope protein Mps2p and SPB components Spc29p and Kar1p; required for mitotic functions of Cdc5p Null mutant is inviable; cells depleted of Bbp1p are defective in nuclear segregation, bud formation, cytokinesis and nuclear spindle formation; overexpression gives ascus that contains asci instead of spores                                                                                                                             |
| YBR184W |                                                                                                                                                                                                                                                                                                                                                                                                                                                                                                                                                                                                 |
| YLL003W | [SFI1] Centrin (Cdc31p)-binding protein required for spindle pole body (SPB) duplication, localizes to the half-bridge of the SPB, required for progression through G(2)-M transition, has similarity to Xenopus laevis XCAP-C                                                                                                                                                                                                                                                                                                                                                                  |
| YOR129C |                                                                                                                                                                                                                                                                                                                                                                                                                                                                                                                                                                                                 |
| YML133C |                                                                                                                                                                                                                                                                                                                                                                                                                                                                                                                                                                                                 |
| YOR177C | [MPC54] Component of the meiotic outer plaque, a membrane-organizing center which is assembled on the cytoplasmic face of the spindle pole body during meiosis II and triggers the formation of the prospore membrane; potential Cdc28p substrate Null: viable. Other phenotypes: sporulation deficient.                                                                                                                                                                                                                                                                                        |
| YDR356W | [SPC110] Inner plaque spindle pole body (SPB) component, ortholog of human kendrin; involved in connecting nuclear microtubules to SPB; interacts with Tub4p-complex and calmodulin; phosphorylated by Mps1p in cell cycle-dependent manner interacts with Spc42p, calmodulin, and a 35 kDa protein spindle pole body component                                                                                                                                                                                                                                                                 |
| YIL149C | [MLP2] Myosin-like protein associated with the nuclear envelope, connects the nuclear pore complex with the nuclear interior; involved in the Tel1p pathway that controls telomere length coiled-coil protein (putative), similar to myosin and TPR                                                                                                                                                                                                                                                                                                                                             |
| YPL124W | [SPC29] Inner plaque spindle pole body (SPB) component, links the central plaque component Spc42p to the inner plaque component Spc110p; required for SPB duplication                                                                                                                                                                                                                                                                                                                                                                                                                           |
| YDL239C | [ADY3] Protein required for spore wall formation, thought to mediate assembly of a Don1p-containing structure at the leading edge of the prospore membrane via interaction with spindle pole body components; potentially phosphorylated by Cdc28p Null forms largely asci that contain 2 spores (dyads) when sporulated. Sporulation defect in ady3ady3 cells is due to a failure to synthesize spore wall polymers.                                                                                                                                                                           |
| YKL042W | [SPC42] Central plaque component of spindle pole body (SPB); involved in SPB duplication, may facilitate attachment of the SPB to the nuclear membrane spindle pole body component Null mutant is inviable; temperature sensitive mutations show SBP duplication                                                                                                                                                                                                                                                                                                                                |
| YOL091W | [SPO21] Component of the meiotic outer plaque of the spindle pole body, involved in modifying the meiotic outer plaque that is required prior to prospore membrane formation meiosis proficient, fails to form spores                                                                                                                                                                                                                                                                                                                                                                           |
| YLR227C | [ADY4] Structural component of the meiotic outer plaque, which is a membrane-organizing center that assembles on the cytoplasmic face of the spindle pole body during meiosis II and triggers the formation of the prospore membrane                                                                                                                                                                                                                                                                                                                                                            |
| YNL225C | [CNM67] Component of the spindle pole body outer plaque; required for spindle orientation and mitotic nuclear migration Null mutant is viable but shows slow growth and a nuclear migration defect                                                                                                                                                                                                                                                                                                                                                                                              |
| YOR373W | [NUD1] Component of the spindle pole body outer plaque, required for exit from mitosis                                                                                                                                                                                                                                                                                                                                                                                                                                                                                                          |
| 0469    | GO_TERM:[alpha,alpha-trehalose-phosphate synthase complex (UDP-forming)] P-Value:5.6e-12                                                                                                                                                                                                                                                                                                                                                                                                                                                                                                        |
| YIL177C |                                                                                                                                                                                                                                                                                                                                                                                                                                                                                                                                                                                                 |
| YMR251W | [GTO3] Putative cytosolic Omega class glutathione transferase Omega class glutathione transferase                                                                                                                                                                                                                                                                                                                                                                                                                                                                                               |
| YIR032C | [DAL3] Ureidoglycolate hydrolase, converts ureidoglycolate to glyoxylate and urea in the third step of allantoin degradation; expression sensitive to nitrogen catabolite repression ureidoglycolate hydrolase                                                                                                                                                                                                                                                                                                                                                                                  |

|         |                                                                                                                                                                                                                                                                                                                                                                                                                                                                                                                                                                                                                          |
|---------|--------------------------------------------------------------------------------------------------------------------------------------------------------------------------------------------------------------------------------------------------------------------------------------------------------------------------------------------------------------------------------------------------------------------------------------------------------------------------------------------------------------------------------------------------------------------------------------------------------------------------|
| YAR066W |                                                                                                                                                                                                                                                                                                                                                                                                                                                                                                                                                                                                                          |
| YBR126C | [TPS1] Synthase subunit of trehalose-6-phosphate synthase/phosphatase complex, which synthesizes the storage carbohydrate trehalose; also found in a monomeric form; expression is induced by the stress response and repressed by the Ras-cAMP pathway trehalose-6-phosphate synthase/phosphatase complex 56 kDa synthase subunit null is viable, but does not grow on glucose and/or fructose, and shows lack of trehalose                                                                                                                                                                                             |
| YDR074W | [TPS2] Phosphatase subunit of the trehalose-6-phosphate synthase/phosphatase complex, which synthesizes the storage carbohydrate trehalose; expression is induced by stress conditions and repressed by the Ras-cAMP pathway trehalose-6-phosphate phosphatase Null mutant is viable, exhibits complete loss of trehalose-6-phosphate phosphatase activity, measured in vitro, and accumulation of excessive amounts of trehalose-6-phosphate instead of trehalose upon heat shock or entrance into stationary phase in vivo; null mutant is temperature sensitive, tps2 (pfk3) pfk1 double mutants are glucose negative |
| YML100W | [TSL1] Large subunit of trehalose 6-phosphate synthase (Tps1p)/phosphatase (Tps2p) complex, which converts uridine-5'-diphosphoglucose and glucose 6-phosphate to trehalose, homologous to Tps3p and may share function similar to TPS3 gene product trehalose-6-phosphate synthase/phosphatase complex 123 kDa regulatory subunit                                                                                                                                                                                                                                                                                       |
| YMR261C | [TPS3] Regulatory subunit of trehalose-6-phosphate synthase/phosphatase complex, which synthesizes the storage carbohydrate trehalose; expression is induced by stress conditions and repressed by the Ras-cAMP pathway trehalose-6-phosphate synthase/phosphatase complex 115 kDa regulatory subunit                                                                                                                                                                                                                                                                                                                    |
| 0470    | GO_TERM:[thioredoxin peroxidase activity] P-Value:9.7e-05                                                                                                                                                                                                                                                                                                                                                                                                                                                                                                                                                                |
| YDR453C | [TSA2] Stress inducible cytoplasmic thioredoxin peroxidase; cooperates with Tsa1p in the removal of reactive oxygen, nitrogen and sulfur species using thioredoxin as hydrogen donor; deletion enhances the mutator phenotype of tsa1 mutants                                                                                                                                                                                                                                                                                                                                                                            |
| YIL039W |                                                                                                                                                                                                                                                                                                                                                                                                                                                                                                                                                                                                                          |
| YML028W | [TSA1] Ubiquitous housekeeping thioredoxin peroxidase, reduces reactive oxygen, nitrogen and sulfur species using thioredoxin as hydrogen donor; mediates redox regulation of the nuclear localization of Yap1p; deletion results in mutator phenotype thioredoxin peroxidase Null mutant is viable, grows slower than wild-type under aerobic conditions                                                                                                                                                                                                                                                                |
| YNL249C | [MPA43] Mitochondrial protein of unknown function Null mutant is viable with no specific phenotype and normal expression of PDC1; but overexpression causes higher basal levels of PDC1                                                                                                                                                                                                                                                                                                                                                                                                                                  |
| YNR033W | [ABZ1] Para-aminobenzoate (PABA) synthase, has similarity to Escherichia coli PABA synthase components PabA and PabB aminodeoxychorismate synthase Null mutant is viable and PABA auxotroph                                                                                                                                                                                                                                                                                                                                                                                                                              |
| 0471    | GO_TERM:[sulfate assimilation] P-Value:1.9e-06                                                                                                                                                                                                                                                                                                                                                                                                                                                                                                                                                                           |
| YDR272W | [GLO2] Cytoplasmic glyoxalase II, catalyzes the hydrolysis of S-D-lactoylglutathione into glutathione and D-lactate glyoxylase-II                                                                                                                                                                                                                                                                                                                                                                                                                                                                                        |
| YEL040W | [UTR2] Putative glycosidase, glycosylphosphatidylinositol (GPI)-anchored protein localized to the bud neck; has a role in cell wall maintenance                                                                                                                                                                                                                                                                                                                                                                                                                                                                          |
| YPR167C | [MET16] 3'-phosphoadenylylsulfate reductase, reduces 3'-phosphoadenylyl sulfate to adenosine-3',5'-bisphosphate and free sulfite using reduced thioredoxin as cosubstrate, involved in sulfate assimilation and methionine metabolism 3'phosphoadenylylsulfate reductase Null mutant is viable, and is a methionine auxotroph                                                                                                                                                                                                                                                                                            |
| YLR043C | [TRX1] Cytoplasmic thioredoxin isoenzyme of the thioredoxin system which protects cells against both oxidative and reductive stress, forms LMA1 complex with Pbi2p, acts as a cofactor for Tsa1p, required for ER-Golgi transport and vacuole inheritance EC 1.8.4.8 thioredoxin Null mutant is viable; trx1-trx2 double mutant shows prolonged S phase, shortened G(sub)1 and methionine auxotrophy                                                                                                                                                                                                                     |
| YER042W | [MXR1] Peptide methionine sulfoxide reductase, reverses the oxidation of methionine residues; involved in oxidative damage repair, providing resistance to oxidative stress and regulation of lifespan peptide methionine sulfoxide reductase                                                                                                                                                                                                                                                                                                                                                                            |
| YGR209C | [TRX2] Cytoplasmic thioredoxin isoenzyme of the thioredoxin system which protects cells against both oxidative and reductive stress, forms LMA1 complex with Pbi2p, acts as a cofactor for Tsa1p, required for ER-Golgi transport and vacuole inheritance EC 1.8.4.8 thioredoxin Null mutant is viable; trx1-trx2 double mutant shows prolonged S phase, shortened G(sub)1 and methionine auxotrophy                                                                                                                                                                                                                     |
| 0472    | GO_TERM:[molecular_function] P-Value:9.8e-02                                                                                                                                                                                                                                                                                                                                                                                                                                                                                                                                                                             |
| YJR136C |                                                                                                                                                                                                                                                                                                                                                                                                                                                                                                                                                                                                                          |
| YKL033W |                                                                                                                                                                                                                                                                                                                                                                                                                                                                                                                                                                                                                          |
| YGR197C | [SNG1] Protein involved in nitrosoguanidine (MNNG) resistance; expression is regulated by transcription factors involved in multidrug resistance Null mutant is viable, sensitive to various chemical mutagens                                                                                                                                                                                                                                                                                                                                                                                                           |
| YNL020C | [ARK1] Serine/threonine protein kinase involved in regulation of the cortical actin cytoskeleton; involved in control of endocytosis serine/threonine kinase (putative) Null mutant is viable and shows slight delocalisation of actin cytoskeleton                                                                                                                                                                                                                                                                                                                                                                      |
| YPL279C |                                                                                                                                                                                                                                                                                                                                                                                                                                                                                                                                                                                                                          |
| 0473    | GO_TERM:[molecular_function] P-Value:1.7e-01                                                                                                                                                                                                                                                                                                                                                                                                                                                                                                                                                                             |
| YDR527W | [RBA50] Protein involved in transcription; interacts with RNA polymerase II subunits Rpb2p, Rpb3, and Rpb11p; has similarity to human RPAP1                                                                                                                                                                                                                                                                                                                                                                                                                                                                              |
| YOL131W |                                                                                                                                                                                                                                                                                                                                                                                                                                                                                                                                                                                                                          |
| 0474    | GO_TERM:[regulation of transcription from RNA polymerase II promoter] P-Value:2.0e-01                                                                                                                                                                                                                                                                                                                                                                                                                                                                                                                                    |

|         |                                                                                                                                                                                                                                                                                                                                                                                                                                                                                          |
|---------|------------------------------------------------------------------------------------------------------------------------------------------------------------------------------------------------------------------------------------------------------------------------------------------------------------------------------------------------------------------------------------------------------------------------------------------------------------------------------------------|
| YDR206W | [EBS1] Protein of unknown function, contains a putative RNA recognition motif, deletion results in short telomeres; similar to Est1p, may be partially redundant with Est1p for telomere maintenance                                                                                                                                                                                                                                                                                     |
| YOR047C | [STD1] Protein involved in control of glucose-regulated gene expression; interacts with protein kinase Snf1p, glucose sensors Snf3p and Rgt2p, and TATA-binding protein Spt15p; acts as a regulator of the transcription factor Rgt1p MTH1 homolog Null mutant is viable, no defects in mating or sporulation. Suppressor of TBP deletion; multicopy suppressor of SNF; std1-mth1 has defective glucose derepression and sporulation                                                     |
| YOL063C | [CRT10] Protein required for normal hydroxyurea resistance; one of constitutive RNR transcription (CRT) regulators                                                                                                                                                                                                                                                                                                                                                                       |
| YBR270C | [YBR270C] Hypothetical protein                                                                                                                                                                                                                                                                                                                                                                                                                                                           |
| YGR249W | [MGA1] Protein similar to heat shock transcription factor; multicopy suppressor of pseudohyphal growth defects of ammonium permease mutants similar to heat shock transcription factor                                                                                                                                                                                                                                                                                                   |
| 0475    | GO_TERM:[thioredoxin-disulfide reductase activity] P-Value:1.6e-06                                                                                                                                                                                                                                                                                                                                                                                                                       |
| YDR353W | [TRR1] Cytoplasmic thioredoxin reductase, key regulatory enzyme that determines the redox state of the thioredoxin system, which acts as a disulfide reductase system and protects cells against both oxidative and reductive stress EC 1.6.4.5[thioredoxin reductase Null mutant is viable but grow slowly; trr1 mutations are sensitive to hydrogen peroxide and activate Mlu1 cell cycle box (MCB)- and Swi4/Swi6 cell cycle box (SCB)-dependent reporter genes in swi6 null mutants. |
| YHR106W | [TRR2] Mitochondrial thioredoxin reductase involved in protection against oxidative stress, required with Glr1p to maintain the redox state of Trx3p, contains active-site motif (CAVC) present in prokaryotic thioredoxin reductases, binds NADPH and FAD thioredoxin reductase Null mutant is viable, increased sensitivity to hydrogen peroxide                                                                                                                                       |
| YFL047W | [RGD2] GTPase-activating protein (RhoGAP) for Cdc42p and Rho5p                                                                                                                                                                                                                                                                                                                                                                                                                           |
| YNL180C | [RHO5] Non-essential small GTPase of the Rho/Rac subfamily of Ras-like proteins, likely involved in protein kinase C (Pkc1p)-dependent signal transduction pathway that controls cell integrity rho GTPase                                                                                                                                                                                                                                                                               |
| 0476    | GO_TERM:[ubiquitin conjugating enzyme complex] P-Value:1.5e-05                                                                                                                                                                                                                                                                                                                                                                                                                           |
| YHR137W | [ARO9] Aromatic aminotransferase, catalyzes the first step of tryptophan, phenylalanine, and tyrosine catabolism aromatic amino acid aminotransferase II                                                                                                                                                                                                                                                                                                                                 |
| YMR152W | [YIM1] Protein of unknown function; proposed to be involved in responding to DNA damaging agents                                                                                                                                                                                                                                                                                                                                                                                         |
| YLR059C | [REX2] RNA exonuclease, required for U4 snRNA maturation; functions redundantly with Rnh70p in 5.8S rRNA maturation, and with Rnh70p and Rex3p in processing of U5 snRNA and RNase P RNA; member of RNase D family of exonucleases RNA exonuclease Null mutant is viable and shows cold-sensitive respiratory defect                                                                                                                                                                     |
| YOR220W | [YOR220W] protein that interacts genetically with the Pat1 mRNA-decapping factor                                                                                                                                                                                                                                                                                                                                                                                                         |
| YMR323W | [ERR3] Protein of unknown function, has similarity to enolases                                                                                                                                                                                                                                                                                                                                                                                                                           |
| YMR140W | [SIP5] Protein of unknown function; interacts with both the Reg1p/Glc7p phosphatase and the Snf1p kinase interaction between Reg1 and Snf1 is reduced threefold in a sip5Delta mutant.                                                                                                                                                                                                                                                                                                   |
| YDR092W | [UBC13] Ubiquitin-conjugating enzyme involved in the error-free DNA postreplication repair pathway; interacts with Mms2p to assemble ubiquitin chains at the Ub Lys-63 residue; DNA damage triggers redistribution from the cytoplasm to the nucleus ubiquitin-conjugating enzyme Deletion results in elevated levels of the DNA damage recognition protein Rad4 and an increase in ubiquitylated Rad23.                                                                                 |
| YGL087C | [MMS2] Protein involved in error-free postreplication DNA repair; forms a heteromeric complex with Ubc13p that has a ubiquitin-conjugating activity; cooperates with chromatin-associated RING finger proteins, Rad18p and Rad5p Null mutant is viable and is sensitive to MMS and UV                                                                                                                                                                                                    |
| 0477    | GO_TERM:[molecular_function] P-Value:6.8e-01                                                                                                                                                                                                                                                                                                                                                                                                                                             |
| YOR040W | [GLO4] Mitochondrial glyoxalase II, catalyzes the hydrolysis of S-D-lactoylglutathione into glutathione and D-lactate glyoxylase-II                                                                                                                                                                                                                                                                                                                                                      |
| YJR097W | [JJJ3] Protein of unknown function, contains a J-domain, which is a region with homology to the E. coli DnaJ protein                                                                                                                                                                                                                                                                                                                                                                     |
| YOR004W |                                                                                                                                                                                                                                                                                                                                                                                                                                                                                          |
| YIL024C |                                                                                                                                                                                                                                                                                                                                                                                                                                                                                          |
| YNL092W |                                                                                                                                                                                                                                                                                                                                                                                                                                                                                          |
| 0478    | GO_TERM:[biological_process] P-Value:9.2e-02                                                                                                                                                                                                                                                                                                                                                                                                                                             |
| YIL172C |                                                                                                                                                                                                                                                                                                                                                                                                                                                                                          |
| YFR047C | [BNA6] Quinolate phosphoribosyl transferase, required for biosynthesis of nicotinic acid from tryptophan via kynurenine pathway Quinolate phosphoribosyl transferase Null: Nicotinic acid auxotroph. Other phenotypes: Deletion of the gene is co-lethal with the deletion of NPT1                                                                                                                                                                                                       |
| YDL012C |                                                                                                                                                                                                                                                                                                                                                                                                                                                                                          |
| YHR032W |                                                                                                                                                                                                                                                                                                                                                                                                                                                                                          |
| 0479    |                                                                                                                                                                                                                                                                                                                                                                                                                                                                                          |

|                |                                                                                                                                                                                                                                                                                                                                                                                                                                                  |
|----------------|--------------------------------------------------------------------------------------------------------------------------------------------------------------------------------------------------------------------------------------------------------------------------------------------------------------------------------------------------------------------------------------------------------------------------------------------------|
| YJL137C        | [GLG2] Self-glucosylating initiator of glycogen synthesis, also glucosylates n-dodecyl-beta-D-maltoside; similar to mammalian glycogenin glycogen synthesis initiator Null mutant is viable; disruption of both GLG2 and GLG2 renders cells unable to synthesize glycogen                                                                                                                                                                        |
| YMR212C        | [EFR3] Non-essential protein of unknown function; exhibits synthetic lethal genetic interactions with PHO85; green fluorescent protein (GFP)-fusion protein localizes to the cell periphery                                                                                                                                                                                                                                                      |
| 0480           | GO_TERM:[glycogen biosynthesis] P-Value:7.5e-10 OVERLAP:[Pho85p complexes] <133.20> SIZE:6                                                                                                                                                                                                                                                                                                                                                       |
| <b>YGL134W</b> | [PCL10] Pho85p cyclin; recruits, activates, and targets Pho85p cyclin-dependent protein kinase to its substrate                                                                                                                                                                                                                                                                                                                                  |
| YLR258W        | [GSY2] Glycogen synthase, similar to Gsy1p; expression induced by glucose limitation, nitrogen starvation, heat shock, and stationary phase; activity regulated by cAMP-dependent, Snf1p and Pho85p kinases as well as by the Gac1p-Glc7p phosphatase glycogen synthase (UDP-glucose-starch glucosyltransferase) Null mutant is viable. Mutant lacking both GSY1 and GSY2 is viable but lacks glycogen synthase activity and glycogen deposition |
| YPL170W        | [DAP1] Heme-binding protein involved in regulation of cytochrome P450 protein Erg11p; damage response protein, related to mammalian membrane progesterone receptors; mutations lead to defects in telomeres, mitochondria, and sterol synthesis Null mutant exhibits sensitivity to MMS, elongated telomeres, elevated petite formation, partial arrest in sterol synthesis                                                                      |
| YFR015C        | [GSY1] Glycogen synthase with similarity to Gsy2p, the more highly expressed yeast homolog; expression induced by glucose limitation, nitrogen starvation, environmental stress, and entry into stationary phase glycogen synthase (UDP-glucose-starch glucosyltransferase) Null mutant is viable. Mutant lacking both GSY1 and GSY2 is viable but lacks glycogen synthase activity and glycogen deposition                                      |
| YKR058W        | [GLG1] Self-glucosylating initiator of glycogen synthesis, also glucosylates n-dodecyl-beta-D-maltoside; similar to mammalian glycogenin glycogen synthesis initiator Null mutant is viable; disruption of both GLG1 and GLG2 renders cells unable to synthesize glycogen                                                                                                                                                                        |
| 0481           | GO_TERM:[phosphoric monoester hydrolase activity] P-Value:4.4e-03                                                                                                                                                                                                                                                                                                                                                                                |
| YMR105C        | [PGM2] Phosphoglucomutase, catalyzes the conversion from glucose-1-phosphate to glucose-6-phosphate, which is a key step in hexose metabolism; functions as the acceptor for a Glc-phosphotransferase phosphoglucomutase Null mutant is viable, pgm1 pgm2 deletion mutants fail to grow on galactose                                                                                                                                             |
| YOR090C        | [PTC5] Mitochondrially localized type 2C protein phosphatase; contains Mg <sup>2+</sup> /Mn <sup>2+</sup> -dependent casein phosphatase activity in vitro but in vivo substrates are unknown type 2C Protein Phosphatase                                                                                                                                                                                                                         |
| YHR046C        | [INM1] Inositol monophosphatase, involved in biosynthesis of inositol and in phosphoinositide second messenger signaling; INM1 expression increases in the presence of inositol and decreases upon exposure to antibipolar drugs lithium and valproate                                                                                                                                                                                           |
| YPR015C        |                                                                                                                                                                                                                                                                                                                                                                                                                                                  |
| 0482           | GO_TERM:[pyruvate dehydrogenase complex (sensu Eukaryota)] P-Value:3.6e-14 OVERLAP:[Pyruvate dehydrogenase] <390> SIZE:5                                                                                                                                                                                                                                                                                                                         |
| YLR375W        | [STP3] Zinc-finger protein of unknown function, possibly involved in pre-tRNA splicing and in uptake of branched-chain amino acids                                                                                                                                                                                                                                                                                                               |
| YML059C        | [NTE1] Serine esterase that deacylates exogenous lysophospholipids, homolog of human neuropathy target esterase (NTE); mammalian NTE1 deacylates phosphatidylcholine to glycerophosphocholine phosphatidylcholine and lysophosphatidylcholine phospholipase                                                                                                                                                                                      |
| YJR051W        | [OSM1] Fumarate reductase, catalyzes the reduction of fumarate to succinate, required for the reoxidation of intracellular NADH under anaerobic conditions; mutations cause osmotic sensitivity osmotic growth protein Null mutant is viable, sensitive to hypertonic medium. Simultaneous disruption of YEL047C and OSM1 results in a growth defect of the yeast under anaerobic conditions, while disruption of OSM1 causes slow growth.       |
| YIL042C        |                                                                                                                                                                                                                                                                                                                                                                                                                                                  |
| <b>YFL018C</b> | [LPD1] Dihydrolipoamide dehydrogenase, the lipoamide dehydrogenase component (E3) of the pyruvate dehydrogenase and 2-oxoglutarate dehydrogenase multi-enzyme complexes dihydrolipoamide dehydrogenase precursor (mature protein is the E3 component of alpha-ketoacid dehydrogenase complexes) unable to utilize glycine as sole nitrogen source                                                                                                |
| <b>YGR193C</b> | [PDX1] Dihydrolipoamide dehydrogenase (E3)-binding protein (E3BP) of the mitochondrial pyruvate dehydrogenase (PDH) complex, plays a structural role in the complex by binding and positioning E3 to the dihydrolipoamide acetyltransferase (E2) core pyruvate dehydrogenase complex protein X component                                                                                                                                         |
| <b>YER178W</b> | [PDA1] E1 alpha subunit of the pyruvate dehydrogenase (PDH) complex, catalyzes the direct oxidative decarboxylation of pyruvate to acetyl-CoA, regulated by glucose pyruvate dehydrogenase alpha subunit (E1 alpha) Null mutant is viable, exhibits reduced growth on glucose and increased formation of petites                                                                                                                                 |
| <b>YBR221C</b> | [PDB1] E1 beta subunit of the pyruvate dehydrogenase (PDH) complex, which is an evolutionarily-conserved multi-protein complex found in mitochondria pyruvate dehydrogenase beta subunit (E1 beta)                                                                                                                                                                                                                                               |
| YDR430C        | [CYM1] Lysine-specific metalloprotease of the mitochondrial intermembrane space, member of the pitrilysin family; degrades proteins and presequence peptides cleaved from imported proteins; required for normal mitochondrial morphology Metalloprotease                                                                                                                                                                                        |
| <b>YNL071W</b> | [LAT1] Dihydrolipoamide acetyltransferase component (E2) of pyruvate dehydrogenase complex, which catalyzes the oxidative decarboxylation of pyruvate to acetyl-CoA pyruvate dehydrogenase complex dihydrolipoamide acetyltransferase component (E2)                                                                                                                                                                                             |
| 0483           |                                                                                                                                                                                                                                                                                                                                                                                                                                                  |

|                |                                                                                                                                                                                                                                                                                                                                                                                                 |
|----------------|-------------------------------------------------------------------------------------------------------------------------------------------------------------------------------------------------------------------------------------------------------------------------------------------------------------------------------------------------------------------------------------------------|
| YGR003W        | [CUL3] Ubiquitin-protein ligase, member of the cullin family with similarity to Cdc53p and human CUL3; null mutation has no apparent phenotype                                                                                                                                                                                                                                                  |
| YLR297W        |                                                                                                                                                                                                                                                                                                                                                                                                 |
| 0484           | GO_TERM:[macromolecule metabolism] P-Value:8.9e-01 OVERLAP:[cytoplasmic ribosomal large subunit] <500.40.10> SIZE:81                                                                                                                                                                                                                                                                            |
| <b>YDL081C</b> | [RPP1A] Ribosomal protein P1 alpha, a component of the ribosomal stalk, which is involved in the interaction between translational elongation factors and the ribosome; accumulation of P1 in the cytoplasm is regulated by phosphorylation and interaction with the P2 stalk component acidic ribosomal protein P1A (YP1alpha) (A1)                                                            |
| YPR078C        |                                                                                                                                                                                                                                                                                                                                                                                                 |
| 0485           | GO_TERM:[membrane] P-Value:6.6e-02                                                                                                                                                                                                                                                                                                                                                              |
| YFL054C        |                                                                                                                                                                                                                                                                                                                                                                                                 |
| YML006C        | [GIS4] CAAX box containing protein of unknown function, proposed to be involved in the RAS/cAMP signaling pathway CAAX box containing protein                                                                                                                                                                                                                                                   |
| 0486           |                                                                                                                                                                                                                                                                                                                                                                                                 |
| YLR134W        | [PDC5] Minor isoform of pyruvate decarboxylase, key enzyme in alcoholic fermentation, decarboxylates pyruvate to acetaldehyde, regulation is glucose- and ethanol-dependent, repressed by thiamine, involved in amino acid catabolism pyruvate decarboxylase undetectable pyruvate decarboxylase activity in pdc1pdc5 double mutants                                                            |
| YOR390W        |                                                                                                                                                                                                                                                                                                                                                                                                 |
| 0487           | GO_TERM:[cellular metabolism] P-Value:9.7e-01                                                                                                                                                                                                                                                                                                                                                   |
| YGR087C        | [PDC6] Minor isoform of pyruvate decarboxylase, key enzyme in alcoholic fermentation, decarboxylates pyruvate to acetaldehyde, regulation is glucose- and ethanol-dependent, involved in amino acid catabolism pyruvate decarboxylase isozyme Null mutant is viable and shows reduced pyruvate decarboxylase activity only in cells grown in ethanol                                            |
| YPR030W        | [CSR2] Nuclear protein with a potential regulatory role in utilization of galactose and nonfermentable carbon sources; overproduction suppresses the lethality at high temperature of a chs5 spa2 double null mutation; potential Cdc28p substrate                                                                                                                                              |
| 0488           |                                                                                                                                                                                                                                                                                                                                                                                                 |
| YNL116W        | [DMA2] Protein involved in regulating spindle position and orientation, functionally redundant with Dma1p; homolog of S. pombe Dma1 and H. sapiens Chfr                                                                                                                                                                                                                                         |
| YKL001C        | [MET14] Adenylylsulfate kinase, required for sulfate assimilation and involved in methionine metabolism adenylylsulfate kinase Null mutant is viable, and is a methionine auxotroph                                                                                                                                                                                                             |
| YNL311C        | [YNL311C] F-box protein F-box protein                                                                                                                                                                                                                                                                                                                                                           |
| 0489           |                                                                                                                                                                                                                                                                                                                                                                                                 |
| YLR097C        | [HRT3] Putative nuclear ubiquitin ligase, based on computational analysis of large-scale protein-protein interaction data; has similarity to F-box proteins; identified in association with Cdc53p, Skp1p and Ubi4 in large-scale studies                                                                                                                                                       |
| YLR289W        | [GUF1] Mitochondrial GTPase of unknown function, similar to E. coli elongation factor-type GTP-binding protein LepA and to LK1236.1 from Caenorhabditis elegans GTPase                                                                                                                                                                                                                          |
| 0490           | GO_TERM:[ubiquitin ligase complex] P-Value:1.5e-04 OVERLAP:[SCF-CDC4 complex] <445.10> SIZE:5                                                                                                                                                                                                                                                                                                   |
| YLR224W        |                                                                                                                                                                                                                                                                                                                                                                                                 |
| <b>YOR057W</b> | [SGT1] Probable cochaperone, regulates activity of Cyr1p (adenylyl cyclase); involved in assembly of the kinetochore complex, associates with the SCF (Skp1p/Cdc53p/F box protein) ubiquitin ligase complex                                                                                                                                                                                     |
| 0491           | GO_TERM:[SCF-dependent proteasomal ubiquitin-dependent protein catabolism] P-Value:1.1e-11 OVERLAP:[SCF-CDC4 complex] <445.10> SIZE:5                                                                                                                                                                                                                                                           |
| <b>YDR054C</b> | [CDC34] Ubiquitin-conjugating enzyme or E2; together with Skp1p, Rbx1p, Cdc53p, and an F-box protein, forms a ubiquitin-protein ligase called the SCF complex which regulates cell cycle progression by targeting key substrates for degradation ubiquitin-conjugating enzyme overexpression confers resistance to xenobiotics (methylmercury, mercuric chloride, and p-chloromercuribenzoate). |
| <b>YFL009W</b> | [CDC4] F-box protein required for G1/S and G2/M transition, associates with Skp1p and Cdc53p to form a complex, SCFCdc4, which acts as ubiquitin-protein ligase directing ubiquitination of the phosphorylated CDK inhibitor Sic1p ubiquitin ligase subunit Null mutant is inviable. cdc4 mutants arrest in meiosis at the mononucleate stage with duplicated spindle pole bodies.              |
| <b>YDL132W</b> | [CDC53] Cullin, structural protein of SCF complexes (which also contain Skp1p, Cdc34p, and an F-box protein) involved in ubiquitination; SCF promotes the G1-S transition by targeting G1 cyclins and the Cln-CDK inhibitor Sic1p for degradation Cells arrest in G1 with active Cln kinases but no Clb-associated Cdc28p kinase activity                                                       |

|         |                                                                                                                                                                                                                                                                                                                                                                                                                                                                                                   |
|---------|---------------------------------------------------------------------------------------------------------------------------------------------------------------------------------------------------------------------------------------------------------------------------------------------------------------------------------------------------------------------------------------------------------------------------------------------------------------------------------------------------|
| YDR328C | [SKP1] Evolutionarily conserved kinetochore protein that is part of multiple protein complexes, including the SCF ubiquitin ligase complex, the CBF3 complex that binds centromeric DNA, and the RAVE complex that regulates assembly of the V-ATPase Null mutant is inviable, temperature-sensitive mutations in SKP1 arrest in G1 or G2                                                                                                                                                         |
| 0492    |                                                                                                                                                                                                                                                                                                                                                                                                                                                                                                   |
| YGR237C |                                                                                                                                                                                                                                                                                                                                                                                                                                                                                                   |
| YIL154C | [IMP2] Transcriptional activator involved in maintenance of ion homeostasis and protection against DNA damage caused by bleomycin and other oxidants, contains a C-terminal leucine-rich repeat transcription factor Null mutant is viable, Inability to grow on maltose, galactose and raffinose in respiratory-deficient conditions or in the presence of ethidium bromide and erythromycin; leaky phenotype on oxidizable carbon sources: sensitivity to heat shock and sporulation deficiency |
| 0493    | GO_TERM:[protein neddylation] P-Value:8.7e-06                                                                                                                                                                                                                                                                                                                                                                                                                                                     |
| YDR139C | [RUB1] Ubiquitin-like protein with similarity to mammalian NEDD8; conjugation (neddylation) substrates include the cullins Cdc53p, Rtt101p, and Cul3p; activated by Ula1p and Uba3p (E1 enzyme pair); conjugation mediated by Ubc12p (E2 enzyme) ubiquitin-like protein Null mutant is viable, with no obvious phenotypes, but is synthetic lethal with cdc34(ubc3) ts mutant                                                                                                                     |
| YLR128W | [DCN1] Putative Nedd8 ligase; binds Nedd8; involved in cullin neddylation; not essential; similar to C.elegans DCN-1; contains UBA-like ubiquitin-binding domain and a DUF298 domain                                                                                                                                                                                                                                                                                                              |
| 0494    | GO_TERM:[protein neddylation] P-Value:1.9e-08                                                                                                                                                                                                                                                                                                                                                                                                                                                     |
| YLR306W | [UBC12] Enzyme that mediates the conjugation of Rub1p, a ubiquitin-like protein, to other proteins; related to E2 ubiquitin-conjugating enzymes Null mutant is viable with no obvious phenotypes. Synthetically lethal with cdc34(ubc3) ts mutant                                                                                                                                                                                                                                                 |
| YPL003W | [ULA1] Protein that acts together with Uba3p to activate Rub1p before its conjugation to proteins (neddylation), which may play a role in protein degradation Null mutant is viable with no obvious mutant phenotype, is synthetically lethal with cdc34(ubc3) ts mutant, and enhances the phenotypes of cdc4, cdc53, and skp1 mutants                                                                                                                                                            |
| YLR151C | [PCD1] Peroxisomal nudix pyrophosphatase with specificity for coenzyme A and CoA derivatives, may function to remove potentially toxic oxidized CoA disulfide from peroxisomes to maintain the capacity for beta-oxidation of fatty acids coenzyme A diphosphatase                                                                                                                                                                                                                                |
| YPR066W | [UBA3] Protein that acts together with Ula1p to activate Rub1p before its conjugation to proteins (neddylation), which may play a role in protein degradation; GFP-fusion protein localizes to the cytoplasm in a punctate pattern ubiquitin-like protein activating enzyme Null mutant is viable with no obvious phenotypes. Synthetically lethal with cdc34(ubc3) ts mutant                                                                                                                     |
| 0495    | GO_TERM:[glutamine family amino acid biosynthesis] P-Value:8.1e-04 OVERLAP:[Tubulin-associated proteins] <140.30.20> SIZE:14                                                                                                                                                                                                                                                                                                                                                                      |
| YOR323C | [PRO2] Gamma-glutamyl phosphate reductase, catalyzes the second step in proline biosynthesis gamma-glutamyl phosphate reductase Proline requiring and unable to grow on YPD (yeast extract-peptone-glucose); synthetic lethality with ctk1                                                                                                                                                                                                                                                        |
| YCR005C | [CIT2] Citrate synthase, catalyzes the condensation of acetyl coenzyme A and oxaloacetate to form citrate, peroxisomal isozyme involved in glyoxylate cycle; expression is controlled by Rtg1p and Rtg2p transcription factors citrate synthase                                                                                                                                                                                                                                                   |
| YJL042W | [MHP1] Microtubule-associated protein involved in assembly and stabilization of microtubules; overproduction results in cell cycle arrest at G2 phase; similar to Drosophila protein MAP and to mammalian MAP4 proteins microtubule-associated protein (MAP) (putative) Null mutant is inviable; overexpression of the MHP1 C-terminus results in short spindles                                                                                                                                  |
| 0496    | GO_TERM:[biological_process] P-Value:9.6e-02                                                                                                                                                                                                                                                                                                                                                                                                                                                      |
| YBL066C | [SEF1] Putative transcription factor, has homolog in Kluyveromyces lactis transcription factor (putative) defective sporulation; high copy number suppressor of rpm2                                                                                                                                                                                                                                                                                                                              |
| YGR117C |                                                                                                                                                                                                                                                                                                                                                                                                                                                                                                   |
| 0497    | GO_TERM:[m7G(5')pppN diphosphatase activity] P-Value:5.2e-05                                                                                                                                                                                                                                                                                                                                                                                                                                      |
| YDR354W | [TRP4] Anthranilate phosphoribosyl transferase of the tryptophan biosynthetic pathway, catalyzes the phosphoribosylation of anthranilate, subject to the general control system of amino acid biosynthesis anthranilate phosphoribosyl transferase tryptophan requiring                                                                                                                                                                                                                           |
| YER065C | [ICL1] Isocitrate lyase, catalyzes the formation of succinate and glyoxylate from isocitrate, a key reaction of the glyoxylate cycle; expression of ICL1 is induced by growth on ethanol and repressed by growth on glucose isocitrate lyase Null mutant is viable, fails to grow on ethanol as a carbon source                                                                                                                                                                                   |
| YJL206C |                                                                                                                                                                                                                                                                                                                                                                                                                                                                                                   |
| YLR081W | [GAL2] Galactose permease, required for utilization of galactose; also able to transport glucose galactose permease Galactose non-utilizer                                                                                                                                                                                                                                                                                                                                                        |
| YJL141C | [YAK1] Serine-threonine protein kinase that is part of a glucose-sensing system involved in growth control in response to glucose availability; translocates from the cytoplasm to the nucleus and phosphorylates Pop2p in response to a glucose signal viable, confers growth to strains deleted for tpk1, tpk2, tpk3 (genes encoding the catalytic subunit of the cAMP-dependent kinase)                                                                                                        |
| YPL245W |                                                                                                                                                                                                                                                                                                                                                                                                                                                                                                   |
| YLR270W | [DCS1] Non-essential hydrolase involved in mRNA decapping, may function in a feedback mechanism to regulate deadenylation, contains pyrophosphatase activity and a HIT (histidine triad) motif; interacts with neutral trehalase Nth1p                                                                                                                                                                                                                                                            |
| YOR173W | [DCS2] Non-essential protein containing a HIT (histidine triad) motif; regulated by Msn2p, Msn4p, and the Ras-cAMP-cAPK signaling pathway, transcript accumulates under glucose limitation, similar to Dcs1p                                                                                                                                                                                                                                                                                      |

|                |                                                                                                                                                                                                                                                                                                                                                                                                                                                                          |
|----------------|--------------------------------------------------------------------------------------------------------------------------------------------------------------------------------------------------------------------------------------------------------------------------------------------------------------------------------------------------------------------------------------------------------------------------------------------------------------------------|
| 0498           | GO_TERM:[catalytic activity] P-Value:7.3e-02                                                                                                                                                                                                                                                                                                                                                                                                                             |
| YHR113W        |                                                                                                                                                                                                                                                                                                                                                                                                                                                                          |
| YPR145W        | [ASN1] Asparagine synthetase, isozyme of Asn2p; catalyzes the synthesis of L-asparagine from L-aspartate in the asparagine biosynthetic pathway asparagine synthetase Null mutant is viable; L-asparagine auxotrophy occurs upon mutation of both ASN1 and ASN2                                                                                                                                                                                                          |
| 0499           | GO_TERM:[vacuole] P-Value:1.3e-02                                                                                                                                                                                                                                                                                                                                                                                                                                        |
| YCR027C        | [RHB1] Putative Rheb-related GTPase involved in regulating canavanine resistance and arginine uptake; member of the Ras superfamily of G-proteins GTP-binding protein Rheb ras family Mutant exhibits shortened lag phase, failure to arrest in stationary phase; overexpression causes delayed growth.                                                                                                                                                                  |
| YOL083W        |                                                                                                                                                                                                                                                                                                                                                                                                                                                                          |
| YPL091W        | [GLR1] Cytosolic and mitochondrial glutathione oxidoreductase, converts oxidized glutathione to reduced glutathione EC 1.6.4.2 glutathione oxidoreductase                                                                                                                                                                                                                                                                                                                |
| YEL071W        | [DLD3] D-lactate dehydrogenase, part of the retrograde regulon which consists of genes whose expression is stimulated by damage to mitochondria and reduced in cells grown with glutamate as the sole nitrogen source, located in the cytoplasm D-lactate dehydrogenase                                                                                                                                                                                                  |
| YOR302W        |                                                                                                                                                                                                                                                                                                                                                                                                                                                                          |
| YGL156W        | [AMS1] Vacuolar alpha mannosidase, involved in free oligosaccharide (fOS) degradation; delivered to the vacuole in a novel pathway separate from the secretory pathway alpha mannosidase                                                                                                                                                                                                                                                                                 |
| YKL103C        | [LAP4] Vacuolar aminopeptidase, often used as a marker protein in studies of autophagy and cytosol to vacuole targeting (CVT) pathway vacuolar aminopeptidase ysc1 Leucine aminopeptidase deficient                                                                                                                                                                                                                                                                      |
| YOL082W        | [ATG19] Protein involved in the cytoplasm-to-vacuole targeting pathway and in autophagy, recognizes cargo proteins and delivers them to the preautophagosomal structure for eventual engulfment by the autophagosome and degradation Receptor for biosynthetic cytoplasm to vacuole targeting Null: viable, unable to target vacuolar aminopeptidase I and to vacuoles, both under growing and nitrogen starvation conditions.                                           |
| 0500           | GO_TERM:[RNA-directed DNA polymerase activity] P-Value:7.6e-03 OVERLAP:[Ume6/Ime1 complex] <510.190.200> SIZE:2                                                                                                                                                                                                                                                                                                                                                          |
| YOL053W        |                                                                                                                                                                                                                                                                                                                                                                                                                                                                          |
| YER160C        |                                                                                                                                                                                                                                                                                                                                                                                                                                                                          |
| YJR027W        |                                                                                                                                                                                                                                                                                                                                                                                                                                                                          |
| <b>YJR094C</b> | [IME1] Master regulator of meiosis that is active only during meiotic events, activates transcription of early meiotic genes through interaction with Ume6p, degraded by the 26S proteasome following phosphorylation by Ime2p The null mutant is viable. Diploids homozygous for the null mutation lack premeiotic DNA synthesis and do not sporulate; these phenotypes are recessive.                                                                                  |
| YMR139W        | [RIM11] Protein kinase required for signal transduction during entry into meiosis; promotes the formation of the Ime1p-Ume6p complex by phosphorylating Ime1p and Ume6p; shares similarity with mammalian glycogen synthase kinase 3-beta Null mutant is viable; some alleles are Spo+ and sporulate slowly; rim11 is epistatic to the lethality of IME1 overexpression in haploids and permits Ime1p accumulation; RIM11 is a high copy suppressor of mck1 (cs) mutants |
| 0501           | GO_TERM:[molecular_function] P-Value:2.0e-01                                                                                                                                                                                                                                                                                                                                                                                                                             |
| YDR158W        | [HOM2] Aspartic beta semi-aldehyde dehydrogenase, catalyzes the second step in the common pathway for methionine and threonine biosynthesis; expression regulated by Gcn4p and the general control of amino acid synthesis aspartic beta semi-aldehyde dehydrogenase Homoserine requiring                                                                                                                                                                                |
| YJR126C        | [VPS70] Protein of unknown function involved in vacuolar protein sorting Null mutant secretes CPY.                                                                                                                                                                                                                                                                                                                                                                       |
| YCR030C        | [SYP1] Protein with a potential role in actin cytoskeletal organization; overexpression suppresses a pfy1 (profilin) null mutation                                                                                                                                                                                                                                                                                                                                       |
| YMR132C        | [JLP2] Protein of unknown function, contains sequence that closely resembles a J domain (typified by the E. coli DnaJ protein)                                                                                                                                                                                                                                                                                                                                           |
| 0502           | GO_TERM:[DNA replication] P-Value:2.0e-02 OVERLAP:[Pre-replication complex (pre-RC)] <410.30> SIZE:16                                                                                                                                                                                                                                                                                                                                                                    |
| YHL024W        | [RIM4] Putative RNA-binding protein required for the expression of early and middle sporulation genes RNA-binding protein of the RRM class (putative) Null mutant is viable. Homozygous null diploid fails to sporulate, does not form meiosis I or II spindles, and exhibits reduced expression of early and middle sporulation-specific genes. Null mutant is suppressed by hyperactive Ime2p derivative, but not by overexpression IME1                               |
| <b>YGL113W</b> | [SLD3] Protein involved in the initiation of DNA replication, required for proper assembly of replication proteins at the origins of replication; interacts with Cdc45p Null mutant is inviable; temperature-sensitive mutants show defects in DNA replication.                                                                                                                                                                                                          |
| YHR092C        | [HXT4] High-affinity glucose transporter of the major facilitator superfamily, expression is induced by low levels of glucose and repressed by high levels of glucose high affinity glucose transporter                                                                                                                                                                                                                                                                  |
| YPR194C        | [OPT2] Oligopeptide transporter; member of the OPT family, with potential orthologs in S. pombe and C. albicans peptide transporter                                                                                                                                                                                                                                                                                                                                      |
| 0503           | GO_TERM:[nucleus] P-Value:2.1e-01                                                                                                                                                                                                                                                                                                                                                                                                                                        |
| YDR020C        |                                                                                                                                                                                                                                                                                                                                                                                                                                                                          |
| YJR056C        |                                                                                                                                                                                                                                                                                                                                                                                                                                                                          |

|         |                                                                                                                                                                                                                                                                                                                                                                               |
|---------|-------------------------------------------------------------------------------------------------------------------------------------------------------------------------------------------------------------------------------------------------------------------------------------------------------------------------------------------------------------------------------|
| YNR012W | [URK1] Uridine/cytidine kinase, component of the pyrimidine ribonucleotide salvage pathway that converts uridine into UMP and cytidine into CMP; involved in the pyrimidine deoxyribonucleotide salvage pathway, converting deoxycytidine into dCMP uridine kinase                                                                                                            |
| 0504    | GO_TERM:[bud neck] P-Value:4.7e-02                                                                                                                                                                                                                                                                                                                                            |
| YBR238C |                                                                                                                                                                                                                                                                                                                                                                               |
| YKR043C |                                                                                                                                                                                                                                                                                                                                                                               |
| YDR085C | [AFR1] Alpha-factor pheromone receptor regulator, negatively regulates pheromone receptor signaling; required for normal mating projection (shmoo) formation; interacts with Cdc12p cytoskeletal protein similar to arrestins defect in alpha-factor-stimulated morphogenesis                                                                                                 |
| YBL085W | [BO11] Protein implicated in polar growth, functionally redundant with Boi2p; interacts with bud-emergence protein Bem1p; contains an SH3 (src homology 3) domain and a PH (pleckstrin homology) domain                                                                                                                                                                       |
| YER124C | [DSE1] Daughter cell-specific protein, may participate in pathways regulating cell wall metabolism; deletion affects cell separation after division and sensitivity to drugs targeted against the cell wall                                                                                                                                                                   |
| YHR003C |                                                                                                                                                                                                                                                                                                                                                                               |
| 0505    |                                                                                                                                                                                                                                                                                                                                                                               |
| YAL054C | [ACS1] Acetyl-coA synthetase isoform, expressed during growth on nonfermentable carbon sources and under aerobic conditions acetyl CoA synthetase Null mutant is viable and grows on ethanol or glucose (but not acetate) as sole carbon source (but with long lag-phase); acs1 acs2 double null mutant is inviable                                                           |
| YLR049C |                                                                                                                                                                                                                                                                                                                                                                               |
| 0506    | GO_TERM:[regulation of exit from mitosis] P-Value:2.5e-05                                                                                                                                                                                                                                                                                                                     |
| YDR226W | [ADK1] Adenylate kinase, required for purine metabolism; localized to the cytoplasm and the mitochondria; lacks cleavable signal sequence adenylate kinase                                                                                                                                                                                                                    |
| YGR153W |                                                                                                                                                                                                                                                                                                                                                                               |
| YLR389C | [STE23] Metalloprotease involved, with homolog Axl1p, in N-terminal processing of pro-a-factor to the mature form; member of the insulin-degrading enzyme family effects a-factor secretion and mating by a cells                                                                                                                                                             |
| YNL335W | [YNL335W] Hypothetical protein                                                                                                                                                                                                                                                                                                                                                |
| YFR028C | [CDC14] Protein phosphatase required for mitotic exit; located in the nucleolus until liberated by the FEAR and Mitotic Exit Network in anaphase, enabling it to act on key substrates to effect a decrease in CDK/B-cyclin activity and mitotic exit protein phosphatase Null mutant is inviable; ts mutant arrests at late anaphase with phenotypes similar to cdc5 mutants |
| YJR053W | [BFA1] Component of the GTPase-activating Bfa1p-Bub2p complex involved in multiple cell cycle checkpoint pathways that control exit from mitosis Null mutant is viable; mutants are sensitive to microtubule inhibitors, exhibit defects in mitotic checkpoints, and exhibit moderate defects in mating efficiency                                                            |
| YMR055C | [BUB2] Mitotic exit network regulator, forms GTPase-activating Bfa1p-Bub2p complex that binds Tem1p and spindle pole bodies, blocks cell cycle progression before anaphase in response to spindle and kinetochore damage Reduces the cell cycle delay which accompanies activation of a conditionally dicentric chromosome                                                    |
| 0507    | GO_TERM:[osmosensory signaling pathway] P-Value:3.5e-04                                                                                                                                                                                                                                                                                                                       |
| YPR075C | [OPY2] Integral membrane protein that functions in the signaling branch of the high-osmolarity glycerol (HOG) pathway; interacts with Ste50p; overproduction blocks cell cycle arrest in the presence of mating pheromone                                                                                                                                                     |
| YBR185C | [MBA1] Protein involved in assembly of mitochondrial respiratory complexes; may act as a receptor for proteins destined for export from the mitochondrial matrix to the inner membrane Null mutant is viable, conditionally defective in the assembly of mitochondrial respiratory complexes                                                                                  |
| YCL032W | [STE50] Protein involved in mating response, invasive/filamentous growth, and osmotolerance, acts as an adaptor that links G protein-associated Cdc42p-Ste20p complex to the effector Ste11p to modulate signal transduction contains SAM (sterile alpha motif) Null mutant is viable, sterile, has a modulated sensitivity to alpha-pheromone                                |
| 0508    | GO_TERM:[site of polarized growth] P-Value:1.2e-03                                                                                                                                                                                                                                                                                                                            |
| YGR014W | [MSB2] Mucin family member at the head of the Cdc42p- and MAP kinase-dependent filamentous growth signaling pathway; also functions as an osmosensor in parallel to the Sho1p-mediated pathway; potential Cdc28p substrate integral membrane protein (putative) multicopy suppressor of cdc24 ts mutation                                                                     |
| YNL233W | [BNI4] Targeting subunit for Glc7p protein phosphatase, localized to the bud neck, required for localization of chitin synthase III to the bud neck via interaction with the chitin synthase III regulatory subunit Skt5p scaffold protein Null mutant is viable, shows delocalized chitin, elongated buds, enlarged bud necks                                                |
| 0509    | GO_TERM:[axial bud site selection] P-Value:9.8e-17 OVERLAP:[Septin filaments] <140.10.20> SIZE:7                                                                                                                                                                                                                                                                              |
| YKL048C | [ELM1] Serine/threonine protein kinase that regulates cellular morphogenesis, septin behavior, and cytokinesis; required for the regulation of other kinases; forms part of the bud neck ring protein kinase                                                                                                                                                                  |
| YDR368W | [YPR1] 2-methylbutyraldehyde reductase, may be involved in isoleucine catabolism                                                                                                                                                                                                                                                                                              |

|                |                                                                                                                                                                                                                                                                                                                                                                                                                                                                                              |
|----------------|----------------------------------------------------------------------------------------------------------------------------------------------------------------------------------------------------------------------------------------------------------------------------------------------------------------------------------------------------------------------------------------------------------------------------------------------------------------------------------------------|
| YPL153C        | [RAD53] Protein kinase, required for cell-cycle arrest in response to DNA damage; activated by trans autophosphorylation when interacting with hyperphosphorylated Rad9p protein kinase Null mutant is inviable, radiation sensitive                                                                                                                                                                                                                                                         |
| YJR092W        | [BUD4] Protein involved in bud-site selection and required for axial budding pattern; localizes with septins to bud neck in mitosis and may constitute an axial landmark for next round of budding; potential Cdc28p substrate Null mutant is viable, haploids have dipolar budding, normally they have axial budding, no effects on diploids                                                                                                                                                |
| YCL024W        | [KCC4] Protein kinase of the bud neck involved in the septin checkpoint, associates with septin proteins, negatively regulates Swe1p by phosphorylation, shows structural homology to bud neck kinases Gin4p and Hsl1p S. pombe Nim1 homolog protein kinase Null mutant is viable. Deletion of KCC4 causes moderate defects in bud formation at stationary phase; overexpression of KCC4 inhibits cell growth.                                                                               |
| YDR507C        | [GIN4] Protein kinase involved in bud growth and assembly of the septin ring, proposed to have kinase-dependent and kinase-independent activities; undergoes autophosphorylation; similar to Kcc4p and Hsl1p serine/threonine kinase (putative) Null mutant is viable, exhibits a mild elongated bud phenotype and some cell clumping                                                                                                                                                        |
| YNL078W        | [NIS1] Protein localized in the bud neck at G2/M phase; physically interacts with septins; possibly involved in a mitotic signaling network                                                                                                                                                                                                                                                                                                                                                  |
| <b>YDL225W</b> | [SHS1] One of five related septins (Cdc3p, Cdc10p, Cdc11p, Cdc12p, Shs1p) that form a cortical filamentous collar at the mother-bud neck which is necessary for normal morphogenesis and cytokinesis septin deficient for cytokinesis                                                                                                                                                                                                                                                        |
| YNL166C        | [BN15] Protein involved in organization of septins at the mother-bud neck, may interact directly with the Cdc11p septin, localizes to bud neck in a septin-dependent manner Null: Null mutant is viable, interacts genetically with CDC3, CDC10, CDC11, and CDC12 (septin) genes                                                                                                                                                                                                             |
| <b>YHR107C</b> | [CDC12] Component of the septin ring of the mother-bud neck that is required for cytokinesis; septins recruit proteins to the neck and can act as a barrier to diffusion at the membrane, and they comprise the 10nm filaments seen with EM 10 nm filament component of mother-bud neck septin abnormal cell-wall deposition and bud growth, inability to complete cytokinesis, failure to form the ring of 10nm filaments in the neck region of budding cells                               |
| <b>YLR314C</b> | [CDC3] Component of the septin ring of the mother-bud neck that is required for cytokinesis; septins recruit proteins to the neck and can act as a barrier to diffusion at the membrane, and they comprise the 10nm filaments seen with EM septin Null mutant is inviable; other mutants show abnormal cell-wall deposition and bud growth, inability to complete cytokinesis, and failure to form the ring of 10nm filaments in the neck region of budding cells.                           |
| <b>YCR002C</b> | [CDC10] Component of the septin ring of the mother-bud neck that is required for cytokinesis; septins recruit proteins to the neck and can act as a barrier to diffusion at the membrane, and they comprise the 10nm filaments seen with EM septin abnormal cell-wall deposition and bud growth, inability to complete cytokinesis, failure to form the ring of 10nm filaments in the neck region of budding cells                                                                           |
| <b>YJR076C</b> | [CDC11] Component of the septin ring of the mother-bud neck that is required for cytokinesis; septins recruit proteins to the neck and can act as a barrier to diffusion at the membrane, and they comprise the 10nm filaments seen with EM 10 nm filament component of mother-bud neck septin abnormal cell-wall deposition and bud growth, inability to complete cytokinesis, failure to form the ring of 10nm filaments in the neck region of budding cells                               |
| 0510           | GO_TERM:[cell morphogenesis] P-Value:9.1e-03 OVERLAP:[Septin filaments] <140.10.20> SIZE:7                                                                                                                                                                                                                                                                                                                                                                                                   |
| <b>YDR218C</b> | [SPR28] Sporulation-specific homolog of the yeast CDC3/10/11/12 family of bud neck microfilament genes; meiotic septin expressed at high levels during meiotic divisions and ascospore formation septin                                                                                                                                                                                                                                                                                      |
| YPL161C        | [BEM4] Protein involved in establishment of cell polarity and bud emergence; interacts with the Rho1p small GTP-binding protein and with the Rho-type GTPase Cdc42p; involved in maintenance of proper telomere length                                                                                                                                                                                                                                                                       |
| 0511           | GO_TERM:[establishment of cell polarity] P-Value:1.2e-15                                                                                                                                                                                                                                                                                                                                                                                                                                     |
| YKL082C        | [RRP14] Essential protein, constituent of 66S pre-ribosomal particles; interacts with proteins involved in ribosomal biogenesis and cell polarity; member of the SURF-6 family                                                                                                                                                                                                                                                                                                               |
| YDR309C        | [GIC2] Protein of unknown function involved in initiation of budding and cellular polarization, interacts with Cdc42p via the Cdc42/Rac-interactive binding (CRIB) domain Null mutant is viable and temperature sensitive at 37 degrees C; gic1 gic2 double null is temperature sensitive at 33 degrees C                                                                                                                                                                                    |
| YHR061C        | [GIC1] Protein of unknown function involved in initiation of budding and cellular polarization, interacts with Cdc42p via the Cdc42/Rac-interactive binding (CRIB) domain Null mutant is viable; gic1 gic2 double null is temperature sensitive at 33 degrees C                                                                                                                                                                                                                              |
| YOR127W        | [RGA1] GTPase-activating protein for the polarity-establishment protein Cdc42p; implicated in control of septin organization, pheromone response, and haploid invasive growth rho GTPase activating protein (GAP) Null mutant is viable but shows increased signaling in the pheromone pathway; haploid null mutants bud predominantly in a bipolar, rather than the normal axial, manner                                                                                                    |
| YNL298W        | [CLA4] Cdc42p activated signal transducing kinase of the PAK (p21-activated kinase) family, involved in septin ring assembly and cytokinesis; directly phosphorylates septins Cdc3p and Cdc10p; other yeast PAK family members are Ste20p and Skm1p Ste20p homolog protein kinase Null mutant is viable, possesses a cytokinesis defect; cla4 cln1 cln2 strains are inviable; cla4 ste20 double deletion mutants cannot maintain septin rings at the bud neck and cannot undergo cytokinesis |
| YER114C        | [BOI2] Protein implicated in polar growth, functionally redundant with Boi1p; interacts with bud-emergence protein Bem1p; contains an SH3 (src homology 3) domain and a PH (pleckstrin homology) domain Null boi1 boi2 mutants become large round cells or lysed with buds, display defects in bud formation and in the maintenance of cell polarity                                                                                                                                         |
| YAL041W        | [CDC24] Guanine nucleotide exchange factor (GEF or GDP-release factor) for Cdc42p; required for polarity establishment and maintenance, and mutants have morphological defects in bud formation and shmooing guanine nucleotide exchange factor (a.k.a. GDP-release factor) for cdc42 temperature sensitive mutation affecting bud formation and localized cell surface growth at a restrictive temperature                                                                                  |
| YGR152C        | [RSR1] GTP-binding protein of the ras superfamily required for bud site selection, morphological changes in response to mating pheromone, and efficient cell fusion; localized to the plasma membrane; significantly similar to mammalian Rap GTPases random budding pattern                                                                                                                                                                                                                 |
| YLR229C        | [CDC42] Small rho-like GTPase, essential for establishment and maintenance of cell polarity; mutants have defects in the organization of actin and septins Rho subfamily of Ras-like proteins Null mutant is inviable; temperature sensitive mutations unable to form buds and display delocalized cell-surface deposition at the restrictive temperature                                                                                                                                    |

|           |                                                                                                                                                                                                                                                                                                                                                                                                                                                                                                                                                                                                                                                                                                                                                                         |
|-----------|-------------------------------------------------------------------------------------------------------------------------------------------------------------------------------------------------------------------------------------------------------------------------------------------------------------------------------------------------------------------------------------------------------------------------------------------------------------------------------------------------------------------------------------------------------------------------------------------------------------------------------------------------------------------------------------------------------------------------------------------------------------------------|
| 0512      | GO_TERM:[protein phosphatase type 2C activity] P-Value:7.3e-05                                                                                                                                                                                                                                                                                                                                                                                                                                                                                                                                                                                                                                                                                                          |
| YER089C   | [PTC2] Type 2C protein phosphatase; dephosphorylates Hog1p to limit maximal osmopressure induced kinase activity; dephosphorylates Ire1p to downregulate the unfolded protein response; dephosphorylates Cdc28p; role in DNA checkpoint inactivation protein phosphatase type 2C                                                                                                                                                                                                                                                                                                                                                                                                                                                                                        |
| YDR247W   | [VHS1] Cytoplasmic serine/threonine protein kinase; identified as a high-copy suppressor of the synthetic lethality of a <i>sis2 sit4</i> double mutant, suggesting a role in G1/S phase progression; homolog of Sks1p                                                                                                                                                                                                                                                                                                                                                                                                                                                                                                                                                  |
| YDR071C   | [PAA1] Polyamine acetyltransferase; acetylates polyamines such as putrescine, spermidine and spermine; may be involved in transcription and/or DNA replication via regulation of levels of polyamines bound to chromosomal DNA polyamine acetyltransferase Null: Mutant is viable. It is somewhat HU sensitive. It shows genetic interactions with <i>gen5</i> , <i>spt8</i> and <i>spt15</i>                                                                                                                                                                                                                                                                                                                                                                           |
| YBR125C   | [PTC4] Cytoplasmic type 2C protein phosphatase; identified as a high-copy number suppressor of the synthetic lethality of a <i>cnb1 mpk1</i> double deletion; overexpression decreases high-osmolarity induced Hog1p phosphorylation and kinase activity type 2C protein phosphatase                                                                                                                                                                                                                                                                                                                                                                                                                                                                                    |
| YDR186C   |                                                                                                                                                                                                                                                                                                                                                                                                                                                                                                                                                                                                                                                                                                                                                                         |
| 0513      | GO_TERM:[organic acid metabolism] P-Value:8.1e-02                                                                                                                                                                                                                                                                                                                                                                                                                                                                                                                                                                                                                                                                                                                       |
| YBR035C   | [PDX3] Pyridoxine (pyridoxamine) phosphate oxidase, has homologs in <i>E. coli</i> and <i>Myxococcus xanthus</i> ; transcription is under the general control of nitrogen metabolism pyridoxine (pyridoxamine) phosphate oxidase                                                                                                                                                                                                                                                                                                                                                                                                                                                                                                                                        |
| YNL157W   | [YNL157W] Hypothetical protein                                                                                                                                                                                                                                                                                                                                                                                                                                                                                                                                                                                                                                                                                                                                          |
| YFL033C   | [RIM15] Glucose-repressible protein kinase involved in signal transduction during cell proliferation in response to nutrients, specifically the establishment of stationary phase; originally identified as a regulator of IME2 trehalose-associated protein kinase related to <i>S. pombe</i> <i>cek1+</i> Null mutant is viable, demonstrates delayed sporulation, decreased sporulation efficiency, and diminished expression of early meiotic genes; <i>rim4</i> , <i>rim11</i> and <i>rim15</i> mutants can't be suppressed by overexpression of IME1                                                                                                                                                                                                              |
| YIL116W   | [HIS5] Histidinol-phosphate aminotransferase, catalyzes the seventh step in histidine biosynthesis; responsive to general control of amino acid biosynthesis; mutations cause histidine auxotrophy and sensitivity to Cu, Co, and Ni salts histidinol-phosphate aminotransferase Null mutant is viable and requires histidine                                                                                                                                                                                                                                                                                                                                                                                                                                           |
| 0514      | GO_TERM:[catalytic activity] P-Value:7.3e-02                                                                                                                                                                                                                                                                                                                                                                                                                                                                                                                                                                                                                                                                                                                            |
| YDL033C   | [SLM3] tRNA-specific 2-thiouridylase, responsible for 2-thiolation of the wobble base of mitochondrial tRNAs; human ortholog is implicated in myoclonus epilepsy associated with ragged red fibers (MERRF)                                                                                                                                                                                                                                                                                                                                                                                                                                                                                                                                                              |
| YGL039W   |                                                                                                                                                                                                                                                                                                                                                                                                                                                                                                                                                                                                                                                                                                                                                                         |
| 0515      | GO_TERM:[IMP cyclohydrolase activity] P-Value:7.5e-06                                                                                                                                                                                                                                                                                                                                                                                                                                                                                                                                                                                                                                                                                                                   |
| YER064C   |                                                                                                                                                                                                                                                                                                                                                                                                                                                                                                                                                                                                                                                                                                                                                                         |
| YLR257W   |                                                                                                                                                                                                                                                                                                                                                                                                                                                                                                                                                                                                                                                                                                                                                                         |
| YCR073W-A | [SOL2] Protein with a possible role in tRNA export; shows similarity to 6-phosphogluconolactonase non-catalytic domains but does not exhibit this enzymatic activity; homologous to Sol1p, Sol3p, and Sol4p                                                                                                                                                                                                                                                                                                                                                                                                                                                                                                                                                             |
| YMR120C   | [ADE17] Enzyme of 'de novo' purine biosynthesis containing both 5-aminoimidazole-4-carboxamide ribonucleotide transformylase and inosine monophosphate cyclohydrolase activities, isozyme of Ade16p; <i>ade16 ade17</i> mutants require adenine and histidine 5-aminoimidazole-4-carboxamide ribonucleotide (AICAR) transformylase/IMP cyclohydrolase Null mutant is viable; <i>ade16 ade17</i> double mutants require adenine                                                                                                                                                                                                                                                                                                                                          |
| YLR028C   | [ADE16] Enzyme of 'de novo' purine biosynthesis containing both 5-aminoimidazole-4-carboxamide ribonucleotide transformylase and inosine monophosphate cyclohydrolase activities, isozyme of Ade17p; <i>ade16 ade17</i> mutants require adenine and histidine 5-aminoimidazole-4-carboxamide ribonucleotide (AICAR) transformylase/IMP cyclohydrolase Null mutant is viable; <i>ade16 ade17</i> double mutant requires adenine                                                                                                                                                                                                                                                                                                                                          |
| YNR034W   | [SOL1] Protein with a possible role in tRNA export; shows similarity to 6-phosphogluconolactonase non-catalytic domains but does not exhibit this enzymatic activity; homologous to Sol2p, Sol3p, and Sol4p                                                                                                                                                                                                                                                                                                                                                                                                                                                                                                                                                             |
| 0516      | GO_TERM:[catalytic activity] P-Value:6.3e-02                                                                                                                                                                                                                                                                                                                                                                                                                                                                                                                                                                                                                                                                                                                            |
| YMR102C   |                                                                                                                                                                                                                                                                                                                                                                                                                                                                                                                                                                                                                                                                                                                                                                         |
| YNL202W   | [SPS19] Peroxisomal 2,4-dienoyl-CoA reductase, auxiliary enzyme of fatty acid beta-oxidation; homodimeric enzyme required for growth and sporulation on petroselinic acid medium; expression induced during late sporulation and in the presence of oleate 2,4-dienoyl-CoA reductase Null mutant is viable. SPS19 is dispensable for growth and sporulation on solid acetate and oleate media, but is essential for these processes to occur on petroselinic acid.                                                                                                                                                                                                                                                                                                      |
| YEL058W   | [PCM1] Essential N-acetylglucosamine-phosphate mutase, a hexosephosphate mutase involved in the biosynthesis of chitin phosphoacetylglucosamine mutase Null mutant is inviable; a Ty insertion mutant exhibits slow growth.                                                                                                                                                                                                                                                                                                                                                                                                                                                                                                                                             |
| YNL218W   | [MGS1] Protein with DNA-dependent ATPase and ssDNA annealing activities involved in maintenance of genome; interacts functionally with DNA polymerase delta; homolog of human Werner helicase interacting protein (WHIP) <i>mgs1</i> is synthetic lethal with <i>rad6</i> and exhibits a synergistic growth defect with <i>rad18</i> and <i>rad5</i> . <i>mgs1</i> mutant is not sensitive to DNA-damaging agents, but <i>mgs1 rad5</i> double mutant has increased sensitivity to hydroxyurea and a greatly increased spontaneous mutation rate. Growth defects of <i>mgs1 rad18</i> double mutants are suppressed by a mutation in <i>SRS2</i> or by overexpression of <i>Rad52</i> . <i>mgs1</i> mutation suppresses temperature sensitivity of <i>POL3</i> mutants. |

|                |                                                                                                                                                                                                                                                                                                                                                                                                                                                                                                                                                                                                                                                                                                    |
|----------------|----------------------------------------------------------------------------------------------------------------------------------------------------------------------------------------------------------------------------------------------------------------------------------------------------------------------------------------------------------------------------------------------------------------------------------------------------------------------------------------------------------------------------------------------------------------------------------------------------------------------------------------------------------------------------------------------------|
| 0517           | GO_TERM:[RNA metabolism] P-Value:8.1e-02 OVERLAP:[rRNA splicing] <440.30.20> SIZE:24                                                                                                                                                                                                                                                                                                                                                                                                                                                                                                                                                                                                               |
| YPL128C        | [TBF1] Telobox-containing general regulatory factor; binds to TTAGGG repeats within subtelomeric anti-silencing regions (STARs) and possibly throughout the genome and mediates their insulating capacity by blocking silent chromatin propagation TTAGGG repeat binding factor lethal                                                                                                                                                                                                                                                                                                                                                                                                             |
| YGR024C        | [THG1] tRNAHis guanylyltransferase, adds a guanosine residue to the 5' end of tRNAHis after transcription and RNase P cleavage; couples nuclear division and migration to cell budding and cytokinesis; essential enzyme conserved among eukaryotes                                                                                                                                                                                                                                                                                                                                                                                                                                                |
| YKL090W        | [CUE2] Protein of unknown function; has two CUE domains that bind ubiquitin, which may facilitate intramolecular monoubiquitination                                                                                                                                                                                                                                                                                                                                                                                                                                                                                                                                                                |
| YPL110C        | [GDE1] Glycerophosphocholine (GroPCho) phosphodiesterase; hydrolyzes GroPCho to choline and glycerolphosphate after its uptake by Git1p permease, for use as a phosphate source and as a precursor for phosphocholine synthesis                                                                                                                                                                                                                                                                                                                                                                                                                                                                    |
| YGR280C        | [PXR1] Essential protein involved in rRNA and snoRNA maturation; competes with TLC1 RNA for binding to Est2p, suggesting a role in regulation of telomerase; human homolog inhibits telomerase; contains a G-patch RNA interacting domain                                                                                                                                                                                                                                                                                                                                                                                                                                                          |
| <b>YMR302C</b> | [YME2] Integral inner mitochondrial membrane protein with similarity to exonucleases; mutants exhibit an increased rate of mitochondrial DNA escape exonuclease (putative)integral membrane protein Null mutant is viable but shows increased rate of DNA escape from mitochondria to the nucleus and, in some strains, shows a growth defect on nonfermentable carbon sources; rna12-1 is a dominant, thermosensitive allele that results in defects in RNA maturation at the restrictive temperature; yme1 cold sensitivity is suppressed by prp1; yme1 prp12 double mutant has synthetic growth defect on ethanol-glycerol medium at 30 degrees                                                 |
| 0518           | GO_TERM:[NAD metabolism] P-Value:7.8e-04                                                                                                                                                                                                                                                                                                                                                                                                                                                                                                                                                                                                                                                           |
| YLR332W        | [MID2] O-glycosylated plasma membrane protein that acts as a sensor for cell wall integrity signaling and activates the pathway; interacts with Rom2p, a guanine nucleotide exchange factor for Rho1p, and with cell integrity pathway protein Zeo1p Null mutant is viable, dies when exposed to mating pheromone                                                                                                                                                                                                                                                                                                                                                                                  |
| YLR438W        | [CAR2] L-ornithine transaminase (OTase), catalyzes the second step of arginine degradation, expression is dually-regulated by allophanate induction and a specific arginine induction process; not nitrogen catabolite repression sensitive ornithine aminotransferase Catabolism of arginine defective                                                                                                                                                                                                                                                                                                                                                                                            |
| YGR010W        | [NMA2] Nicotinic acid mononucleotide adenylyltransferase, involved in NAD(+) salvage pathway nicotinamide/nicotinic acid mononucleotide adenylyltransferase Null: viable. Other phenotypes: 2 or more copies increase rDNA and telomeric silencing                                                                                                                                                                                                                                                                                                                                                                                                                                                 |
| YLR328W        | [NMA1] Nicotinic acid mononucleotide adenylyltransferase, involved in NAD(+) salvage pathway nicotinamide/nicotinic acid mononucleotide adenylyltransferase Null: viable. Other phenotypes: 2 or more copies increase rDNA and telomeric silencing                                                                                                                                                                                                                                                                                                                                                                                                                                                 |
| 0519           | GO_TERM:[aryl-alcohol dehydrogenase activity] P-Value:5.4e-06                                                                                                                                                                                                                                                                                                                                                                                                                                                                                                                                                                                                                                      |
| YDL243C        | [AAD4] Putative aryl-alcohol dehydrogenase with similarity to P. chrysosporium aryl-alcohol dehydrogenase, involved in the oxidative stress response aryl-alcohol dehydrogenase (putative) Responds to oxidative stress induced by diamide and di-ethyl maleic acid ester in a YAP1 dependant manner                                                                                                                                                                                                                                                                                                                                                                                               |
| YNL331C        | [AAD14] Putative aryl-alcohol dehydrogenase with similarity to P. chrysosporium aryl-alcohol dehydrogenase; mutational analysis has not yet revealed a physiological role aryl-alcohol dehydrogenase (putative)                                                                                                                                                                                                                                                                                                                                                                                                                                                                                    |
| 0520           | GO_TERM:[deoxyribonucleoside metabolism] P-Value:1.4e-04                                                                                                                                                                                                                                                                                                                                                                                                                                                                                                                                                                                                                                           |
| YDR132C        |                                                                                                                                                                                                                                                                                                                                                                                                                                                                                                                                                                                                                                                                                                    |
| YJL218W        |                                                                                                                                                                                                                                                                                                                                                                                                                                                                                                                                                                                                                                                                                                    |
| YER023W        | [PRO3] Delta 1-pyrroline-5-carboxylate reductase, catalyzes the last step in proline biosynthesis delta 1-pyrroline-5-carboxylate reductase proline requiring                                                                                                                                                                                                                                                                                                                                                                                                                                                                                                                                      |
| YDR321W        | [ASP1] Cytosolic L-asparaginase, involved in asparagine catabolism asparaginase I Aspartic acid requiring                                                                                                                                                                                                                                                                                                                                                                                                                                                                                                                                                                                          |
| YPL060C-A      |                                                                                                                                                                                                                                                                                                                                                                                                                                                                                                                                                                                                                                                                                                    |
| YBR176W        | [ECM31] Ketopantoate hydroxymethyltransferase, required for pantothenic acid biosynthesis, converts 2-oxoisovalerate into 2-dehydropanoate                                                                                                                                                                                                                                                                                                                                                                                                                                                                                                                                                         |
| YLR245C        | [CDD1] Cytidine deaminase; catalyzes the modification of cytidine to uridine in vitro but native RNA substrates have not been identified, localizes to both the nucleus and cytoplasm cytidine deaminase                                                                                                                                                                                                                                                                                                                                                                                                                                                                                           |
| YBR252W        | [DUT1] dUTPase, catalyzes the hydrolysis of dUTP to dUMP and PPi and thereby prevents the incorporation of uracil into DNA during replication dUTP pyrophosphatase                                                                                                                                                                                                                                                                                                                                                                                                                                                                                                                                 |
| YML064C        | [TEM1] GTP-binding protein of the ras superfamily involved in termination of M-phase; controls actomyosin and septin dynamics during cytokinesis GTP-binding protein[ras family Null mutant is inviable; net1-1 can suppress the lethality of a tem1 deletion by enabling Clb2p degradation and Sic1p accumulation; tem1-3 temperature sensitive mutants arrest in late anaphase with large buds, an elongated spindle and separated DNA; overexpression of CDC15, CDC5, SIC1, SPO12, and CDC14 can suppress the ts growth defects of tem1-3; overexpression of CLB2 is toxic to tem1-3 mutants at permissive temperature; deletion of cfi1 suppress the temperature sensitivity of tem1-1 mutants |
| YPL070W        | [MUK1] Protein of unknown function, localized to the cytoplasm; computational analysis of large-scale protein-protein interaction data suggests a possible role in transcriptional regulation                                                                                                                                                                                                                                                                                                                                                                                                                                                                                                      |

|                |                                                                                                                                                                                                                                                                                                                                                                                                                                                                                                                                                                                                                                                                                          |
|----------------|------------------------------------------------------------------------------------------------------------------------------------------------------------------------------------------------------------------------------------------------------------------------------------------------------------------------------------------------------------------------------------------------------------------------------------------------------------------------------------------------------------------------------------------------------------------------------------------------------------------------------------------------------------------------------------------|
| 0521           | GO_TERM:[molecular_function] P-Value:1.7e-01                                                                                                                                                                                                                                                                                                                                                                                                                                                                                                                                                                                                                                             |
| YDL099W        | [BUG1] Protein of unknown function; green fluorescent protein (GFP)-fusion protein localizes to the cytoplasm in a punctate pattern                                                                                                                                                                                                                                                                                                                                                                                                                                                                                                                                                      |
| YKL050C        |                                                                                                                                                                                                                                                                                                                                                                                                                                                                                                                                                                                                                                                                                          |
| 0522           | GO_TERM:[cell wall chitin metabolism] P-Value:1.8e-13 OVERLAP:[COPI] <260.30.10> SIZE:8                                                                                                                                                                                                                                                                                                                                                                                                                                                                                                                                                                                                  |
| YPR095C        | [SYT1] Guanine nucleotide exchange factor (GEF) for Arf proteins; involved in vesicular transport; suppressor of ypt3 mutations; member of the Sec7-domain family                                                                                                                                                                                                                                                                                                                                                                                                                                                                                                                        |
| YDL137W        | [ARF2] ADP-ribosylation factor, GTPase of the Ras superfamily involved in regulation of coated formation vesicles in intracellular trafficking within the Golgi; functionally interchangeable with Arf1p ADP-ribosylation factor 2                                                                                                                                                                                                                                                                                                                                                                                                                                                       |
| YDR358W        | [GGA1] Golgi-localized protein with homology to gamma-adaptin, interacts with and regulates Arf1p and Arf2p in a GTP-dependent manner in order to facilitate traffic through the late Golgi ARF-binding protein Single and double knockouts are viable at both 30 C and 37 C. Cells lacking GGA1, GGA2 exhibit defects in invertase processing, vacuolar morphology, maturation of alpha-factor, and sorting of CPY, proteinase A to the vacuole, but not endocytosis.                                                                                                                                                                                                                   |
| YNL045W        |                                                                                                                                                                                                                                                                                                                                                                                                                                                                                                                                                                                                                                                                                          |
| YDR517W        | [GRH1] Protein involved in the spindle assembly checkpoint; homolog of human GRASP65, which is a Golgi localized protein that functions in postmitotic reassembly of Golgi stacks mammalian GRASP protein homolog Null: Null mutation is viable, exhibits defects in spindle checkpoint                                                                                                                                                                                                                                                                                                                                                                                                  |
| <b>YDL192W</b> | [ARF1] ADP-ribosylation factor, GTPase of the Ras superfamily involved in regulation of coated formation vesicles in intracellular trafficking within the Golgi; functionally interchangeable with Arf2p ADP-ribosylation factor Null mutant is viable and shows slow growth, cold sensitivity and sensitivity to normally sublethal concentrations of fluoride ion in the medium.                                                                                                                                                                                                                                                                                                       |
| YOR299W        | [BUD7] Protein involved in bud-site selection; diploid mutants display an axial-like budding pattern Diploid-specific heterogenous bud site selection                                                                                                                                                                                                                                                                                                                                                                                                                                                                                                                                    |
| YBR023C        | [CHS3] Chitin synthase III, catalyzes the transfer of N-acetylglucosamine (GlcNAc) to chitin; required for synthesis of the majority of cell wall chitin, the chitin ring during bud emergence, and spore wall chitosan chitin synthase 3                                                                                                                                                                                                                                                                                                                                                                                                                                                |
| YLR330W        | [CHS5] Protein of unknown function, involved in chitin biosynthesis by regulating Chs3p localization, also involved in cell fusion during mating                                                                                                                                                                                                                                                                                                                                                                                                                                                                                                                                         |
| YKR027W        | [BCH2] The authentic, non-tagged protein was localized to the mitochondria                                                                                                                                                                                                                                                                                                                                                                                                                                                                                                                                                                                                               |
| YJL099W        | [CHS6] Protein of unknown function, involved in chitin biosynthesis by regulating Chs3p localization                                                                                                                                                                                                                                                                                                                                                                                                                                                                                                                                                                                     |
| YMR237W        | [BCH1] Protein that colocalizes with clathrin-coated vesicles; involved in transport at the trans-Golgi                                                                                                                                                                                                                                                                                                                                                                                                                                                                                                                                                                                  |
| 0523           | GO_TERM:[CCAAT-binding factor complex] P-Value:8.3e-08 OVERLAP:[CCAAT-binding factor complex] <510.160> SIZE:4                                                                                                                                                                                                                                                                                                                                                                                                                                                                                                                                                                           |
| YDL194W        | [SNF3] Plasma membrane glucose sensor that regulates glucose transport; has 12 predicted transmembrane segments; long cytoplasmic C-terminal tail is required for low glucose induction of hexose transporter genes HXT2 and HXT4 glucose sensor Null mutant is viable, defective in high affinity glucose transport, unable to grow on low glucose media, unable to grow on raffinose; snf3 delta hxt1 delta hxt2 delta hxt3 delta hxt4 delta cells are unable to grow on media containing high concentrations of glucose (5%) but can grow on low-glucose (0.5%) media; expression of SNF3 abolishes growth of hxt1 delta hxt2 delta hxt3 delta hxt4 delta cells on low-glucose medium |
| YDL138W        | [RGT2] Plasma membrane glucose receptor, highly similar to Snf3p; both Rgt2p and Snf3p serve as transmembrane glucose sensors generating an intracellular signal that induces expression of glucose transporter (HXT) genes glucose receptor Dominant mutant suppresses growth defect of snf3 mutants on low concentrations of glucose or fructose                                                                                                                                                                                                                                                                                                                                       |
| YDR277C        | [MTH1] Negative regulator of the glucose-sensing signal transduction pathway, required for repression of transcription by Rgt1p; interacts with Rgt1p and the Snf3p and Rgt2p glucose sensors; phosphorylated by Yck1p, triggering Mth1p degradation Msn3p homolog (61% identical) Null mutant is viable; mth1(htr1) mutants are deficient in glucose uptake and transcription of glucose transporters; mth1 (htr1) mutation suppresses glucose sensitivity of tpi1 mutant; multicopy expression of HXT genes suppresses some defects of mth1 (htr1) mutants; msn3 mth1 double deletion mutants are impaired in derepression of invertase in response to glucose limitation              |
| YDR022C        | [CIS1] Protein of unknown function that may be involved in microtubule organization; high-copy suppressor of CIK1 deletion                                                                                                                                                                                                                                                                                                                                                                                                                                                                                                                                                               |
| YGR236C        | [SPG1] Protein required for survival at high temperature during stationary phase; not required for growth on nonfermentable carbon sources                                                                                                                                                                                                                                                                                                                                                                                                                                                                                                                                               |
| <b>YGL237C</b> | [HAP2] Subunit of the heme-activated, glucose-repressed Hap2p/3p/4p/5p CCAAT-binding complex, a transcriptional activator and global regulator of respiratory gene expression; contains sequences sufficient for both complex assembly and DNA binding transcriptional activator protein of CYC1 (component of HAP2/HAP3 heteromer)                                                                                                                                                                                                                                                                                                                                                      |
| <b>YBL021C</b> | [HAP3] Subunit of the heme-activated, glucose-repressed Hap2p/3p/4p/5p CCAAT-binding complex, a transcriptional activator and global regulator of respiratory gene expression; contains sequences contributing to both complex assembly and DNA binding transcriptional activator protein of CYC1 (component of HAP2/HAP3 heteromer)                                                                                                                                                                                                                                                                                                                                                     |
| <b>YOR358W</b> | [HAP5] Subunit of the heme-activated, glucose-repressed Hap2/3/4/5 CCAAT-binding complex, a transcriptional activator and global regulator of respiratory gene expression; required for assembly and DNA binding activity of the complex CCAAT-binding transcription factor component (along with Hap2p and Hap3p)                                                                                                                                                                                                                                                                                                                                                                       |
| 0524           | GO_TERM:[catalytic activity] P-Value:2.9e-03 OVERLAP:[STE5-MAPK complex] <470.20> SIZE:5                                                                                                                                                                                                                                                                                                                                                                                                                                                                                                                                                                                                 |
| YDL178W        | [DLD2] D-lactate dehydrogenase, located in the mitochondrial matrix                                                                                                                                                                                                                                                                                                                                                                                                                                                                                                                                                                                                                      |
| YOL033W        | [MSE1] Mitochondrial glutamyl-tRNA synthetase, encoded by a nuclear gene glutamine-tRNA ligase An uncharacterized allele is respiratory deficient.                                                                                                                                                                                                                                                                                                                                                                                                                                                                                                                                       |

|                |                                                                                                                                                                                                                                                                                                                                                                                                                                                                    |
|----------------|--------------------------------------------------------------------------------------------------------------------------------------------------------------------------------------------------------------------------------------------------------------------------------------------------------------------------------------------------------------------------------------------------------------------------------------------------------------------|
| YJR069C        | [HAM1] Protein of unknown function that is involved in DNA repair; mutant is sensitive to the base analog, 6-N-hydroxylaminopurine, while gene disruption does not increase the rate of spontaneous mutagenesis Null mutant is viable but is sensitive to 6-N-hydroxylaminopurine (HAP), a mutagen; however, mutant does not show higher spontaneous mutation rate                                                                                                 |
| YGL136C        | [MRM2] Mitochondrial 21S rRNA methyltransferase, required for methylation of U(2791) in 21S rRNA; MRM2 deletion confers thermosensitive respiration and loss of mitochondrial DNA; has similarity to Spb1p and Trm7p, and to E. coli FtsJ/RrmJ 2'O-ribose methyltransferase Null: thermosensitive respiration; loses mitochondrial DNA with high frequency                                                                                                         |
| <b>YGR040W</b> | [KSS1] Mitogen-activated protein kinase (MAPK) involved in signal transduction pathways that control filamentous growth and pheromone response MAP kinase                                                                                                                                                                                                                                                                                                          |
| 0525           | GO_TERM:[filamentous growth] P-Value:1.7e-10                                                                                                                                                                                                                                                                                                                                                                                                                       |
| YDR480W        | [DIG2] Regulatory protein of unknown function, pheromone-inducible, involved in the regulation of mating-specific genes and the invasive growth pathway, required for MAP-kinase imposed repression, inhibits pheromone-responsive transcription MAP kinase-associated protein Null mutant is viable; dig1 dig2 double mutants show constitutive mating pheromone specific gene expression and invasive growth                                                     |
| YPL049C        | [DIG1] Regulatory protein of unknown function, constitutively-expressed, involved in the regulation of mating-specific genes and the invasive growth pathway, required for MAP-kinase imposed repression, inhibits pheromone-responsive transcription MAP kinase-associated protein Null mutant is viable, shows abnormal bud morphology; dig1 dig2 double mutants show constitutive mating defect and invasive growth; overexpression causes pheromone resistance |
| YHR084W        | [STE12] Transcription factor that is activated by a MAP kinase signaling cascade, activates genes involved in mating or pseudohyphal/invasive growth pathways; cooperates with Tec1p transcription factor to regulate genes specific for invasive growth transcription factor Null mutant is viable but sterile; homozygous mutant diploids exhibit defects in pseudohyphal growth                                                                                 |
| YBR083W        | [TEC1] Transcription factor required for full Ty1 expression, Ty1-mediated gene activation, and haploid invasive and diploid pseudohyphal growth; TEA/ATTS DNA-binding domain family member TEA/ATTS DNA-binding domain family transcription factor                                                                                                                                                                                                                |
| YER109C        | [FLO8] Transcription factor required for flocculation, diploid filamentous growth, and haploid invasive growth; genome reference strain S288C and most laboratory strains have a mutation in this gene transcriptional activator of FLO1 (putative) Null mutant is viable; wild-type gene is required for flocculation and for pseudo-hyphal growth                                                                                                                |
| YMR164C        | [MSS11] Transcription factor involved in regulation of invasive growth and starch degradation; controls the activation of MUC1 and STA2 in response to nutritional signals 758 amino acid polypeptide with poly-glutamine and poly-asparagine domains Null mutant is viable, exhibits diminished transcription of STA2; multiple copies suppress repressive effect of STA10, enhance expression of STA2 in non-STA10 strains                                       |
| 0526           | GO_TERM:[ribonuclease H2 complex] P-Value:1.8e-10                                                                                                                                                                                                                                                                                                                                                                                                                  |
| YDR279W        | [RNH202] Ribonuclease H2 subunit, required for RNase H2 activity                                                                                                                                                                                                                                                                                                                                                                                                   |
| YLR154C        | [RNH203] Ribonuclease H2 subunit, required for RNase H2 activity Null: viable. Other phenotypes: required for RNase H2 activity                                                                                                                                                                                                                                                                                                                                    |
| YNL072W        | [RNH201] Ribonuclease H2 catalytic subunit, removes RNA primers during Okazaki fragment synthesis; cooperates with Rad27p nuclease Null mutant is viable but shows 75% reduction of RNase H activity in cell extracts                                                                                                                                                                                                                                              |
| 0527           | GO_TERM:[methionyl glutamyl tRNA synthetase complex] P-Value:6.2e-09                                                                                                                                                                                                                                                                                                                                                                                               |
| YAR019C        | [CDC15] Protein kinase of the Mitotic Exit Network that is localized to the spindle pole bodies at late anaphase; promotes mitotic exit by directly switching on the kinase activity of Dbf2p protein kinase domain Null mutant inviable, arrests in G2; buds at distal instead of axial position, undergoes autolysis when buds reach the size of mother cells; the mitotic, but not meiotic, phenotype is suppressible by overexpressing SPO12.                  |
| YML037C        |                                                                                                                                                                                                                                                                                                                                                                                                                                                                    |
| YHR131C        |                                                                                                                                                                                                                                                                                                                                                                                                                                                                    |
| YNR013C        | [PHO91] Low-affinity phosphate transporter; deletion of pho84, pho87, pho89, pho90, and pho91 causes synthetic lethality; transcription independent of Pi and Pho4p activity; overexpression results in vigorous growth                                                                                                                                                                                                                                            |
| YGR264C        | [MES1] Methionyl-tRNA synthetase, forms a complex with glutamyl-tRNA synthetase (Gus1p) and Arc1p, which increases the catalytic efficiency of both tRNA synthetases; also has a role in nuclear export of tRNAs methionine-tRNA ligase no growth at 36 degrees C                                                                                                                                                                                                  |
| YGL105W        | [ARC1] Protein that binds tRNA and methionyl- and glutamyl-tRNA synthetases (Mes1p and Gus1p), delivering tRNA to them, stimulating catalysis, and ensuring their localization to the cytoplasm; also binds quadruplex nucleic acids Null mutant is viable, leads to slow growth and reduced MetRS activity; arc1- mutants are synthetic lethals and are complemented by the genes for methionyl-tRNA and glutamyl-tRNA synthetase.                                |
| YGL245W        | [GUS1] Glutamyl-tRNA synthetase (GluRS), forms a complex with methionyl-tRNA synthetase (Mes1p) and Arc1p; complex formation increases the catalytic efficiency of both tRNA synthetases and ensures their correct localization to the cytoplasm                                                                                                                                                                                                                   |
| 0528           | GO_TERM:[kinase activity] P-Value:8.7e-03                                                                                                                                                                                                                                                                                                                                                                                                                          |
| YAL017W        | [PSK1] One of two (see also PSK2) PAS domain containing S/T protein kinases; coordinately regulates protein synthesis and carbohydrate metabolism and storage in response to a unknown metabolite that reflects nutritional status                                                                                                                                                                                                                                 |
| YDR262W        |                                                                                                                                                                                                                                                                                                                                                                                                                                                                    |
| YDR454C        | [GUK1] Guanylate kinase, converts GMP to GDP; required for growth and mannose outer chain elongation of cell wall N-linked glycoproteins guanylate kinase                                                                                                                                                                                                                                                                                                          |

|         |                                                                                                                                                                                                                                                                                                                                                                    |
|---------|--------------------------------------------------------------------------------------------------------------------------------------------------------------------------------------------------------------------------------------------------------------------------------------------------------------------------------------------------------------------|
| 0529    |                                                                                                                                                                                                                                                                                                                                                                    |
| YBL104C |                                                                                                                                                                                                                                                                                                                                                                    |
| YNL054W | [VAC7] Integral vacuolar membrane protein involved in vacuole inheritance and morphology; may function to regulate Fab1p kinase activity<br>Null mutant is viable but shows severely swollen vacuoles, figure-eight morphology, and slow growth at 24 degrees                                                                                                      |
| 0530    | GO_TERM:[negative regulation of gluconeogenesis] P-Value:4.2e-19                                                                                                                                                                                                                                                                                                   |
| YDL176W |                                                                                                                                                                                                                                                                                                                                                                    |
| YBR105C | [VID24] Peripheral membrane protein located at Vid (vacuole import and degradation) vesicles; regulates fructose-1,6-bisphosphatase (FBPase) targeting to the vacuole; involved in proteasome-dependent catabolite degradation of FBPase peripheral vesicle membrane protein<br>Null mutant is viable, defective in fructose-1,6-bisphosphatase degradation        |
| YDR255C | [RMD5] Cytosolic protein required for sporulation; also required for the ubiquitination of the gluconeogenetic enzyme fructose-1,6-bisphosphatase, which is degraded rapidly after the switch from gluconeogenesis to glycolysis                                                                                                                                   |
| YBL049W | [MOH1] Protein of unknown function, has homology to kinase Snf7p; not required for growth on nonfermentable carbon sources; essential for viability in stationary phase                                                                                                                                                                                            |
| YCL039W | [GID7] Protein of unknown function, involved in proteasome-dependent catabolite inactivation of fructose-1,6-bisphosphatase; contains six WD40 repeats; computational analysis suggests that Gid7p and Moh1p have similar functions                                                                                                                                |
| YIL097W | [FYV10] Protein of unknown function, required for survival upon exposure to K1 killer toxin; involved in proteasome-dependent catabolite inactivation of fructose-1,6-bisphosphatase; contains CTLH domain Null mutant is viable but exhibits K1 killer toxin hypersensitivity.                                                                                    |
| YIL017C | [VID28] Protein involved in proteasome-dependent catabolite degradation of fructose-1,6-bisphosphatase (FBPase); localized to the nucleus and the cytoplasm                                                                                                                                                                                                        |
| YGL227W | [VID30] Protein involved in proteasome-dependent catabolite degradation of fructose-1,6-bisphosphatase (FBPase); shifts the balance of nitrogen metabolism toward the production of glutamate; localized to the nucleus and the cytoplasm Null mutant is viable but exhibits vacuolar degradation of cytosolic proteins; mutants are also sensitive to starvation. |
| YMR135C | [GID8] Protein of unknown function, involved in proteasome-dependent catabolite inactivation of fructose-1,6-bisphosphatase; contains LisH and CTLH domains, like Vid30p; dosage-dependent regulator of START                                                                                                                                                      |
| 0531    | GO_TERM:[cellular metabolism] P-Value:9.7e-01                                                                                                                                                                                                                                                                                                                      |
| YOR226C | [ISU2] Conserved protein of the mitochondrial matrix, required for synthesis of mitochondrial and cytosolic iron-sulfur proteins, performs a scaffolding function in mitochondria during Fe/S cluster assembly; isu1 isu2 double mutant is inviable Null mutant is viable on YPD at 30 degrees C, and is synthetically lethal with isu1 null.                      |
| YPL088W |                                                                                                                                                                                                                                                                                                                                                                    |
| 0532    | GO_TERM:[biological_process] P-Value:2.3e-01                                                                                                                                                                                                                                                                                                                       |
| YLR114C | [YLR114C] Mutation is synthetically lethal with apl2 vps1 double mutant Transposon insertion allele is synthetically lethal with pho85-delta                                                                                                                                                                                                                       |
| YEL020C |                                                                                                                                                                                                                                                                                                                                                                    |
| YIL118W | [RHO3] Non-essential small GTPase of the Rho/Rac subfamily of Ras-like proteins involved in the establishment of cell polarity; GTPase activity positively regulated by the GTPase activating protein (GAP) Rgd1p GTP-binding protein ras homolog severe growth delay and decrease in cell viability                                                               |
| 0533    | GO_TERM:[transcriptional activator activity] P-Value:3.1e-04                                                                                                                                                                                                                                                                                                       |
| YGR196C | [FYV8] Protein of unknown function, required for survival upon exposure to K1 killer toxin Null phenotype is K1 killer toxin hypersensitive                                                                                                                                                                                                                        |
| YBR240C | [THI2] Zinc finger protein of the Zn(II)2Cys6 type, probable transcriptional activator of thiamine biosynthetic genes Null mutant is viable, demonstrates thiamine auxotrophy, reduced expression of thiamine biosynthetic genes                                                                                                                                   |
| YDL080C | [THI3] Probable decarboxylase, required for expression of enzymes involved in thiamine biosynthesis; may have a role in catabolism of amino acids to long-chain and complex alcohols alpha-ketoisocaproate decarboxylase                                                                                                                                           |
| 0534    | GO_TERM:[Rho GTPase activator activity] P-Value:2.9e-05                                                                                                                                                                                                                                                                                                            |
| YBR260C | [RGD1] GTPase-activating protein (RhoGAP) for Rho3p and Rho4p, possibly involved in control of actin cytoskeleton organization GTPase activating protein (GAP) (putative) Null mutant is viable and exhibits slightly decreased viability during late exponential and stationary phase in minimal medium                                                           |
| YDL240W | [LRG1] Putative GTPase-activating protein (GAP) involved in the Pkc1p-mediated signaling pathway that controls cell wall integrity; appears to specifically regulate 1,3-beta-glucan synthesis similar to LIM-domain proteins and to rho/rac GTPase-activating family of proteins                                                                                  |
| YNL090W | [RHO2] Non-essential small GTPase of the Rho/Rac subfamily of Ras-like proteins, involved in the establishment of cell polarity and in microtubule assembly GTP-binding protein rho subfamily                                                                                                                                                                      |
| 0535    | GO_TERM:[catalytic activity] P-Value:1.1e-02                                                                                                                                                                                                                                                                                                                       |
| YKL216W | [URA1] Dihydroorotate dehydrogenase, catalyzes the fourth enzymatic step in the de novo biosynthesis of pyrimidines, converting dihydroorotic acid into orotic acid dihydroorotate dehydrogenase uracil requiring                                                                                                                                                  |

|                |                                                                                                                                                                                                                                                                                                                                                                                                                                                                           |
|----------------|---------------------------------------------------------------------------------------------------------------------------------------------------------------------------------------------------------------------------------------------------------------------------------------------------------------------------------------------------------------------------------------------------------------------------------------------------------------------------|
| YKR055W        | [RHO4] Non-essential small GTPase of the Rho/Rac subfamily of Ras-like proteins, likely to be involved in the establishment of cell polarity<br>GTP-binding protein ras homolog Null mutant is viable; rho3 rho4 cells are inviable at 30 degrees C                                                                                                                                                                                                                       |
| YLR303W        | [MET17] O-acetyl homoserine-O-acetyl serine sulfhydrylase, required for sulfur amino acid synthesis O-acetylhomoserine (thiol)-lyase                                                                                                                                                                                                                                                                                                                                      |
| YOL128C        | [YGK3] Protein kinase related to mammalian glycogen synthase kinases of the GSK-3 family; GSK-3 homologs (Mck1p, Rim11p, Mrk1p, Ygk3p) are involved in control of Msn2p-dependent transcription of stress responsive genes and in protein degradation protein kinase                                                                                                                                                                                                      |
| 0536           | GO_TERM:[molecular_function] P-Value:3.7e-01                                                                                                                                                                                                                                                                                                                                                                                                                              |
| YGR271W        | [SLH1] Putative RNA helicase related to Ski2p, involved in translation inhibition of non-poly(A) mRNAs; required for repressing propagation of dsRNA viruses                                                                                                                                                                                                                                                                                                              |
| YER049W        | [TPA1] Hypothetical protein                                                                                                                                                                                                                                                                                                                                                                                                                                               |
| YOR051C        |                                                                                                                                                                                                                                                                                                                                                                                                                                                                           |
| 0537           | GO_TERM:[protein_tag] P-Value:2.5e-05 OVERLAP:[cytoplasmic ribosomal small subunit] <500.40.20> SIZE:57                                                                                                                                                                                                                                                                                                                                                                   |
| YKR094C        | [RPL40B] Fusion protein, identical to Rpl40Ap, that is cleaved to yield ubiquitin and a ribosomal protein of the large (60S) ribosomal subunit with similarity to rat L40; ubiquitin may facilitate assembly of the ribosomal protein into ribosomes also encodes a ubiquitin protein ribosomal protein L40B                                                                                                                                                              |
| <b>YLR167W</b> | [RPS31] Fusion protein that is cleaved to yield a ribosomal protein of the small (40S) subunit and ubiquitin; ubiquitin may facilitate assembly of the ribosomal protein into ribosomes; interacts genetically with translation factor eIF2B also encodes a ubiquitin protein ribosomal protein S31 (S37) (YS24)                                                                                                                                                          |
| YDL122W        | [UBP1] Ubiquitin-specific protease that removes ubiquitin from ubiquitinated proteins; cleaves at the C terminus of ubiquitin fusions irrespective of their size; capable of cleaving polyubiquitin chains ubiquitin-specific protease Null mutant is viable. Null yuh1 ubp1 ubp2 ubp3 quadruple mutants are viable and retain the ability to deubiquitinate ubiquitin fusions. UB1 is a dosage dependent suppressor of rsp5 mutations                                    |
| YDR291W        | [YDR291W] Putative DNA helicase DNA helicase                                                                                                                                                                                                                                                                                                                                                                                                                              |
| 0538           | GO_TERM:[ubiquitin cycle] P-Value:4.3e-05                                                                                                                                                                                                                                                                                                                                                                                                                                 |
| YMR316W        | [DIA1] Protein of unknown function, involved in invasive and pseudohyphal growth; green fluorescent protein (GFP)-fusion protein localizes to the cytoplasm in a punctate pattern Null mutant is viable and causes invasive growth in haploids and pseudohyphal growth in diploids                                                                                                                                                                                        |
| YER125W        | [RSP5] Ubiquitin-protein ligase involved in ubiquitin-mediated protein degradation; plays a role in heat shock element (HSE)-mediated gene expression and multivesicular body sorting; contains a hect (homologous to E6-AP carboxyl terminus) domain Null mutant is inviable; an rsp5 mutation was isolated as a suppressor of mutations in SPT3; certain rsp5 mutants also exhibit hypersensitivity to stresses such as cadmium and canavanine, and sporulation defects |
| YGL144C        | [ROG1] Protein with putative serine active lipase domain                                                                                                                                                                                                                                                                                                                                                                                                                  |
| YMR275C        | [BUL1] Ubiquitin-binding component of the Rsp5p E3-ubiquitin ligase complex, functional homolog of Bul2p, disruption causes temperature-sensitive growth, overexpression causes missorting of amino acid permeases                                                                                                                                                                                                                                                        |
| YEL062W        | [NPR2] Regulator of nitrogen permeases; transcription is induced in response to proline and urea; contains two PEST sequences                                                                                                                                                                                                                                                                                                                                             |
| YHL002W        | [HSE1] Subunit of the endosomal Vps27p-Hse1p complex required for sorting of ubiquitinated membrane proteins into intraluminal vesicles prior to vacuolar degradation, as well as for recycling of Golgi proteins and formation of luminal membranes Null: accumulates enlarged prevacuolar/endosomal compartment. Fails to sort proteins into the vacuolar lumen.. Other phenotypes: secretes CPY                                                                        |
| YOR124C        | [UBP2] Ubiquitin-specific protease that removes ubiquitin from ubiquitinated proteins, cleaves at the C terminus of ubiquitin fusions; capable of cleaving polyubiquitin and possesses isopeptidase activity ubiquitin-specific protease Null mutant is viable. Null yuh1 ubp1 ubp2 ubp3 quadruple mutants are viable and retain the ability to deubiquitinate ubiquitin fusions.                                                                                         |
| YGR268C        | [HUA1] Cytoplasmic protein containing a zinc finger domain with sequence similarity to that of Type I J-proteins; computational analysis of large-scale protein-protein interaction data suggests a possible role in actin patch assembly                                                                                                                                                                                                                                 |
| YOR138C        | [RUP1] Protein involved in regulation of Rsp5p, which is an essential HECT ubiquitin ligase; required for binding of Rsp5p to Ubp2p; contains an UBA domain                                                                                                                                                                                                                                                                                                               |
| 0539           | GO_TERM:[biological_process] P-Value:9.2e-02                                                                                                                                                                                                                                                                                                                                                                                                                              |
| YNL211C        |                                                                                                                                                                                                                                                                                                                                                                                                                                                                           |
| YJR142W        |                                                                                                                                                                                                                                                                                                                                                                                                                                                                           |
| YBL024W        | [NCL1] S-adenosyl-L-methionine-dependent tRNA: m5C-methyltransferase, methylates cytosine to m5C at several positions in tRNAs and intron-containing pre-tRNAs; similar to Nop2p and human proliferation associated nucleolar protein p120 tRNA:m5C-methyltransferase Null mutant is viable, sensitive to paromomycin, lacks m5C methylation in total yeast tRNA                                                                                                          |
| YPL150W        |                                                                                                                                                                                                                                                                                                                                                                                                                                                                           |
| 0540           | GO_TERM:[telomere capping] P-Value:1.1e-07                                                                                                                                                                                                                                                                                                                                                                                                                                |
| YLR146C        | [SPE4] Spermine synthase, required for the biosynthesis of spermine and also involved in biosynthesis of pantothenic acid spermine synthase                                                                                                                                                                                                                                                                                                                               |

|                |                                                                                                                                                                                                                                                                                                                                                                                                                                                                     |
|----------------|---------------------------------------------------------------------------------------------------------------------------------------------------------------------------------------------------------------------------------------------------------------------------------------------------------------------------------------------------------------------------------------------------------------------------------------------------------------------|
| YPR069C        | [SPE3] Spermidine synthase, involved in biosynthesis of spermidine and also in biosynthesis of pantothenic acid; spermidine is required for growth of wild-type cells putrescine aminopropyltransferase (spermidine synthase) Null mutant is viable, has no spermidine synthase activity, requires spermine or spermidine for growth                                                                                                                                |
| YGL256W        | [ADH4] Alcohol dehydrogenase type IV, dimeric enzyme demonstrated to be zinc-dependent despite sequence similarity to iron-activated alcohol dehydrogenases; transcription is induced in response to zinc deficiency; alcohol dehydrogenase isoenzyme IV alcohol dehydrogenase isoenzyme IV                                                                                                                                                                         |
| YDL220C        | [CDC13] Single stranded DNA-binding protein found at TG1-3 telomere G-tails; regulates telomere replication through recruitment of specific sub-complexes, but the essential function is telomere capping single-stranded TG1-3 telomere G-tails binding protein                                                                                                                                                                                                    |
| YDR082W        | [STN1] Telomere end-binding and capping protein, plays a key role with Pol12p in linking telomerase action with completion of lagging strand synthesis, and in a regulatory step required for telomere capping                                                                                                                                                                                                                                                      |
| YLR010C        | [TEN1] Protein that regulates telomeric length; protects telomeric ends in a complex with Cdc13p and Stn1p                                                                                                                                                                                                                                                                                                                                                          |
| 0541           | GO_TERM:[nucleus] P-Value:7.6e-01                                                                                                                                                                                                                                                                                                                                                                                                                                   |
| YER062C        | [HOR2] One of two redundant DL-glycerol-3-phosphatases (RHR2/GPP1 encodes the other) involved in glycerol biosynthesis; induced in response to hyperosmotic stress and oxidative stress, and during the diauxic transition DL-glycerol-3-phosphatase Mutants lacking both RHR2 and HOR2 are devoid of glycerol 3-phosphatase activity and produce only a small amount of glycerol. Overproduction of both genes does not significantly enhance glycerol production. |
| YKL069W        |                                                                                                                                                                                                                                                                                                                                                                                                                                                                     |
| 0542           | GO_TERM:[double-strand break repair] P-Value:6.0e-05 OVERLAP:[DNA ligase IV] <510.180.30.20> SIZE:2                                                                                                                                                                                                                                                                                                                                                                 |
| YLR265C        | [NEJ1] Protein involved in regulation of nonhomologous end joining; repressed by MAT heterozygosity; associates with Lif1p and regulates its cellular distribution Mating-type regulated component of NHEJ Null mutant is viable, defective in NHEJ; Overexpression restores NHEJ in MATa/MATalpha cells                                                                                                                                                            |
| YLR109W        | [AHP1] Thiol-specific peroxiredoxin, reduces hydroperoxides to protect against oxidative damage; function in vivo requires covalent conjugation to Urm1p alkyl hydroperoxide reductase hypersensitive to tert-butyl hydroperoxide                                                                                                                                                                                                                                   |
| <b>YGL090W</b> | [LIF1] Protein involved in DNA double-strand break repair; physically interacts with DNA ligase 4 (Lig4p); homologous to mammalian XRCC4 protein Null mutant is viable but is deficient in non-homologous double-strand break repair; inefficient in sporulation; LIG4 protein destabilization                                                                                                                                                                      |
| YBR063C        |                                                                                                                                                                                                                                                                                                                                                                                                                                                                     |
| YDR369C        | [XRS2] Protein required for DNA repair; component of the Mre11 complex, which is involved in double strand breaks, meiotic recombination, telomere maintenance, and checkpoint signaling DNA repair protein X-ray sensitive, spores inviable, xrs2 is rescued by spo13 and is epistatic to rad52                                                                                                                                                                    |
| 0543           | GO_TERM:[transcriptional activator activity] P-Value:1.8e-03 OVERLAP:[OAF complex] <510.190.100> SIZE:2                                                                                                                                                                                                                                                                                                                                                             |
| YNL325C        | [FIG4] Protein required for efficient mating, member of a family of eukaryotic proteins that contain a domain homologous to Sac1p Null mutant is viable, mating defective                                                                                                                                                                                                                                                                                           |
| YOR336W        | [KRE5] Protein required for beta-1,6 glucan biosynthesis; mutations result in aberrant morphology and severe growth defects Null mutant is viable but has aberrant morphology, reduced levels of cell wall (1,6)-beta-glucan, and extremely compromised growth                                                                                                                                                                                                      |
| <b>YAL051W</b> | [OAF1] Oleate-activated transcription factor, acts alone and as a heterodimer with Pip2p; activates genes involved in beta-oxidation of fatty acids and peroxisome organization and biogenesis transcription factor                                                                                                                                                                                                                                                 |
| <b>YOR363C</b> | [PIP2] Autoregulatory oleate-specific transcriptional activator of peroxisome proliferation, contains Zn(2)-Cys(6) cluster domain, forms heterodimer with Oaf1p, binds oleate response elements (OREs), activates beta-oxidation genes transcription factor                                                                                                                                                                                                         |
| 0544           |                                                                                                                                                                                                                                                                                                                                                                                                                                                                     |
| YGR211W        | [ZPR1] Essential protein with two zinc fingers, present in the nucleus of growing cells but relocates to the cytoplasm in starved cells via a process mediated by Cpr1p; binds to translation elongation factor eEF-1 (Tef1p) zinc finger protein                                                                                                                                                                                                                   |
| YOR009W        | [TIR4] Cell wall mannoprotein of the Srp1p/Tip1p family of serine-alanine-rich proteins; expressed under anaerobic conditions and required for anaerobic growth; transcription is also induced by cold shock cell wall mannoprotein inviable under anaerobic conditions                                                                                                                                                                                             |
| 0545           | GO_TERM:[lysine biosynthesis via amino adipic acid] P-Value:1.6e-04 OVERLAP:[L-aminopadipate-semialdehyde dehydrogenase] <280> SIZE:2                                                                                                                                                                                                                                                                                                                               |
| YLR247C        |                                                                                                                                                                                                                                                                                                                                                                                                                                                                     |
| YOR028C        | [CIN5] Basic leucine zipper transcriptional factor of the yAP-1 family that mediates pleiotropic drug resistance and salt tolerance; localizes constitutively to the nucleus bZIP (basic-leucine zipper) protein/can activate transcription from a promoter containing a Yap recognition site Null mutant is viable and suppresses the cold sensitivity of yap1 mutants                                                                                             |
| <b>YBR115C</b> | [LYS2] Alpha amino adipate reductase, catalyzes the reduction of alpha-amino adipate to alpha-amino adipate 6-semialdehyde, which is the fifth step in biosynthesis of lysine; activation requires posttranslational phosphopantetheinylation by Lys5p alpha amino adipate reductase Null mutant is viable, lysine auxotroph                                                                                                                                        |

|                |                                                                                                                                                                                                                                                                                                                                                                                                                                                           |
|----------------|-----------------------------------------------------------------------------------------------------------------------------------------------------------------------------------------------------------------------------------------------------------------------------------------------------------------------------------------------------------------------------------------------------------------------------------------------------------|
| <b>YGL154C</b> | [LYS5] Phosphopantetheinyl transferase involved in lysine biosynthesis; converts inactive apo-form of Lys2p (alpha-aminoadipate reductase) into catalytically active holo-form by posttranslational addition of phosphopantetheine alpha aminoadipate reductase phosphopantetheinyl transferase Lysine requiring                                                                                                                                          |
| 0546           | GO_TERM:[RNA binding] P-Value:2.7e-02                                                                                                                                                                                                                                                                                                                                                                                                                     |
| YJR014W        | [TMA22] Protein of unknown function that associates with ribosomes and has a putative RNA binding domain; interacts with Tma20p; has homology to human protein DRP1, which interacts with human Tma20p homolog MCT-1                                                                                                                                                                                                                                      |
| YDR326C        |                                                                                                                                                                                                                                                                                                                                                                                                                                                           |
| YER007C-A      | [TMA20] Protein of unknown function that associates with ribosomes and has a putative RNA binding domain; interacts with Tma22p; null mutant exhibits translation defects; has homology to human oncogene MCT-1                                                                                                                                                                                                                                           |
| 0547           | GO_TERM:[mutagenesis] P-Value:7.8e-07 OVERLAP:[DNA polymerase zeta] <410.40.110> SIZE:2                                                                                                                                                                                                                                                                                                                                                                   |
| YOR368W        | [RAD17] Checkpoint protein, involved in the activation of the DNA damage and meiotic pachytene checkpoints; with Mec3p and Ddc1p, forms a clamp that is loaded onto partial duplex DNA; homolog of human and S. pombe Rad1 and U. maydis Rec1 proteins 3'-5'exonuclease (putative)                                                                                                                                                                        |
| YPL029W        | [SUV3] ATP-dependent RNA helicase, component of the mitochondrial degradosome along with the RNase Msu1p; the degradosome associates with the ribosome and mediates turnover of aberrant or unprocessed RNAs Deletion of SUV3 leads to a variety of disturbances in mtRNA metabolism and results in respiratory incompetence.                                                                                                                             |
| YPL194W        | [DDC1] DNA damage checkpoint protein, part of a PCNA-like complex required for DNA damage response, required for pachytene checkpoint to inhibit cell cycle in response to unrepaired recombination intermediates; potential Cdc28p substrate Null mutant is viable, sensitive to DNA damage and defective in delaying G1-S and G2-M transition and in decreasing rate of DNA synthesis when DNA is damaged during G1, G2 or S phase, respectively        |
| <b>YIL139C</b> | [REV7] Subunit of DNA polymerase zeta, which is involved in DNA repair; required for mutagenesis induced by DNA damage DNA polymerase zeta (pol-zeta) subunit                                                                                                                                                                                                                                                                                             |
| YOR346W        | [REV1] Deoxycytidyl transferase, forms a complex with the subunits of DNA polymerase zeta, Rev3p and Rev7p; involved in repair of abasic sites in damaged DNA deoxycytidyl transferase Null mutant is viable, exhibits decreased revertibility                                                                                                                                                                                                            |
| <b>YPL167C</b> | [REV3] Subunit of DNA polymerase zeta, which is involved in DNA repair; required for mutagenesis induced by DNA damage DNA polymerase zeta subunit The null mutant is viable and resists ultraviolet (UV) mutagenesis in both haploid and homozygous mutant diploid cells. Other antimutator phenotypes are also observed.                                                                                                                                |
| 0548           | GO_TERM:[methylenetetrahydrofolate reductase (NADPH) activity] P-Value:1.9e-07                                                                                                                                                                                                                                                                                                                                                                            |
| YGL125W        | [MET13] Isozyme of methylenetetrahydrofolate reductase, catalyzes the reduction of 5,10-methylenetetrahydrofolate to 5-methyltetrahydrofolate in the methionine biosynthesis pathway methylenetetrahydrofolate reductase (mthfr) (putative) Null mutant is viable and shows methionine auxotrophy; double disruption of MET12 and MET13 (the two putative mthfr genes) also confers methionine auxotrophy, but has no other known phenotype at this time. |
| YPL023C        | [MET12] Isozyme of methylenetetrahydrofolate reductase, catalyzes the reduction of 5,10-methylenetetrahydrofolate to 5-methyltetrahydrofolate in the methionine biosynthesis pathway methylenetetrahydrofolate reductase (mthfr) (putative) Null mutant is viable and shows no phenotypes; double disruption of MET12 and MET13 (the two putative mthfr genes) confers methionine auxotrophy, but has no other known phenotype at this time               |
| 0549           | GO_TERM:[DNA replication] P-Value:1.1e-02                                                                                                                                                                                                                                                                                                                                                                                                                 |
| YKL113C        | [RAD27] 5' to 3' exonuclease, 5' flap endonuclease, required for Okazaki fragment processing and maturation as well as for long-patch base-excision repair; member of the S. pombe RAD2/FEN1 family 42 kDa 5' to 3' exonuclease required for Okazaki fragment processing Null mutant demonstrates temperature-sensitive growth and sensitivity to UV light and methylmethane sulfonate. rad27 mutant cells are defective in Okazaki fragment maturation.  |
| YDL164C        | [CDC9] DNA ligase found in the nucleus and mitochondria, an essential enzyme that joins Okazaki fragments during DNA replication; also acts in nucleotide excision repair, base excision repair, and recombination DNA ligase cell division cycle blocked at 36 degrees, increased sensitivity to ultraviolet radiation and bleomycin; temperature sensitive                                                                                              |
| YOR378W        |                                                                                                                                                                                                                                                                                                                                                                                                                                                           |
| 0550           | GO_TERM:[catalytic activity] P-Value:7.3e-02                                                                                                                                                                                                                                                                                                                                                                                                              |
| YGL234W        | [ADE5,7] Bifunctional enzyme of the 'de novo' purine nucleotide biosynthetic pathway, contains aminoimidazole ribotide synthetase and glycinamide ribotide synthetase activities aminoimidazole ribotide synthetase glycinamide ribotide synthetase Adenine requiring                                                                                                                                                                                     |
| YOR298W        | [MUM3] Protein of unknown function involved in the organization of the outer spore wall layers; has similarity to the tafazzins superfamily of acyltransferases                                                                                                                                                                                                                                                                                           |
| 0551           | GO_TERM:[DNA replication factor C complex] P-Value:5.9e-29 OVERLAP:[Replication factor C complex] <410.40.30> SIZE:5                                                                                                                                                                                                                                                                                                                                      |
| YCL016C        | [DCC1] Subunit of a complex with Ctf8p and Ctf18p that shares some components with Replication Factor C, required for sister chromatid cohesion and telomere length maintenance benomyl sensitive and defective in sister chromatid cohesion                                                                                                                                                                                                              |
| YHL023C        | [RMD11] Protein required for sporulation                                                                                                                                                                                                                                                                                                                                                                                                                  |

|                |                                                                                                                                                                                                                                                                                                                                                                                                                                 |
|----------------|---------------------------------------------------------------------------------------------------------------------------------------------------------------------------------------------------------------------------------------------------------------------------------------------------------------------------------------------------------------------------------------------------------------------------------|
| YBR088C        | [POL30] Proliferating cell nuclear antigen (PCNA), functions as the sliding clamp for DNA polymerase delta; may function as a docking site for other proteins required for mitotic and meiotic chromosomal DNA replication and for DNA repair Proliferating Cell Nuclear Antigen (PCNA)                                                                                                                                         |
| YER173W        | [RAD24] Checkpoint protein, involved in the activation of the DNA damage and meiotic pachytene checkpoints; subunit of a clamp loader that loads Rad17p-Mec3p-Ddc1p onto DNA; homolog of human and <i>S. pombe</i> Rad17 protein cell cycle exonuclease (putative) radiation sensitive                                                                                                                                          |
| YOR144C        | [ELG1] Protein required for S phase progression and telomere homeostasis, forms an alternative replication factor C complex important for DNA replication and genome integrity; mutants are sensitive to DNA damage                                                                                                                                                                                                             |
| YFR027W        | [ECO1] Acetyltransferase required for the establishment of sister chromatid cohesion during DNA replication, but not for its maintenance during G2 and M phases; also required for postreplicative double-strand break repair; interacts with Chl1p                                                                                                                                                                             |
| <b>YOR217W</b> | [RFC1] Subunit of heteropentameric Replication factor C (RF-C), which is a DNA binding protein and ATPase that acts as a clamp loader of the proliferating cell nuclear antigen (PCNA) processivity factor for DNA polymerases delta and epsilon replication factor C subunit 1 similar to human RFC 140 kDa subunit Null mutant is inviable, rfc1 conditional mutants arrest before mitosis                                    |
| YHR191C        | [CTF8] Subunit of a complex with Ctf18p that shares some subunits with Replication Factor C and is required for sister chromatid cohesion                                                                                                                                                                                                                                                                                       |
| YMR078C        | [CTF18] Subunit of a complex with Ctf8p that shares some subunits with Replication Factor C and is required for sister chromatid cohesion; may have overlapping functions with Rad24p in the DNA damage replication checkpoint Null mutant is viable, exhibits increased level of spontaneous mitotic recombination, slow growth, and cold sensitivity                                                                          |
| <b>YJR068W</b> | [RFC2] Subunit of heteropentameric Replication factor C (RF-C), which is a DNA binding protein and ATPase that acts as a clamp loader of the proliferating cell nuclear antigen (PCNA) processivity factor for DNA polymerases delta and epsilon replication factor C subunit 2 similar to human RFC 37 kDa subunit                                                                                                             |
| <b>YBR087W</b> | [RFC5] Subunit of heteropentameric Replication factor C (RF-C), which is a DNA binding protein and ATPase that acts as a clamp loader of the proliferating cell nuclear antigen (PCNA) processivity factor for DNA polymerases delta and epsilon replication factor C subunit 5 similar to human RFC 38 kDa subunit                                                                                                             |
| <b>YNL290W</b> | [RFC3] Subunit of heteropentameric Replication factor C (RF-C), which is a DNA binding protein and ATPase that acts as a clamp loader of the proliferating cell nuclear antigen (PCNA) processivity factor for DNA polymerases delta and epsilon replication factor C subunit 3 similar to human RFC 36 kDa subunit                                                                                                             |
| <b>YOL094C</b> | [RFC4] Subunit of heteropentameric Replication factor C (RF-C), which is a DNA binding protein and ATPase that acts as a clamp loader of the proliferating cell nuclear antigen (PCNA) processivity factor for DNA polymerases delta and epsilon replication factor C subunit 4 similar to human RFC 40 kDa subunit                                                                                                             |
| 0552           | GO_TERM:[catalytic activity] P-Value:3.0e-01                                                                                                                                                                                                                                                                                                                                                                                    |
| YMR023C        | [MSS1] Mitochondrial protein, forms a heterodimer complex with Mto1p that performs the 5-carboxymethylaminomethyl modification of the wobble uridine base in mitochondrial tRNAs; similar to human GTPBP3 GTPase (putative) respiratory deficient in presence of pr454 mutation in mitochondrial 15S rRNA; block in splicing of mitochondrial introns                                                                           |
| YMR076C        | [PDS5] Protein required for establishment and maintenance of sister chromatid condensation and cohesion, colocalizes with cohesin on chromosomes in an interdependent manner, may function as a protein-protein interaction scaffold                                                                                                                                                                                            |
| YBR249C        | [ARO4] 3-deoxy-D-arabino-heptulosonate-7-phosphate (DAHP) synthase, catalyzes the first step in aromatic amino acid biosynthesis and is feedback-inhibited by tyrosine 3-deoxy-D-arabino-heptulosonate 7-phosphate (DAHP) synthase isoenzyme                                                                                                                                                                                    |
| YEL047C        |                                                                                                                                                                                                                                                                                                                                                                                                                                 |
| 0553           | GO_TERM:[chromatin remodeling] P-Value:1.5e-01 OVERLAP:[other DNA repair complexes] <510.180.20> SIZE:5                                                                                                                                                                                                                                                                                                                         |
| <b>YGL163C</b> | [RAD54] DNA-dependent ATPase, stimulates strand exchange by modifying the topology of double-stranded DNA; involved in the recombinational repair of double-strand breaks in DNA during vegetative growth and meiosis; member of the SWI/SNF family Null mutant is viable, radiation sensitive Deletion of this homologous recombination (HR) gene decreases psoralen-induced recombination and increases mutation frequencies. |
| YER140W        |                                                                                                                                                                                                                                                                                                                                                                                                                                 |
| YKL056C        | [TMA19] Protein of unknown function that associates with ribosomes; homolog of translationally controlled tumor protein; green fluorescent protein (GFP)-fusion protein localizes to the cytoplasm; YKL056C is not an essential gene                                                                                                                                                                                            |
| YIL074C        | [SER33] 3-phosphoglycerate dehydrogenase, catalyzes the first step in serine and glycine biosynthesis; isozyme of Ser3p 3-phosphoglycerate dehydrogenase Null: enzyme activity of 3P-glycerate dehydrogenase is decreased in null mutant compared to wildtype and abolished in ser3 ser33 double deletion mutant, Ser33p is the major isoenzyme                                                                                 |
| YLR053C        |                                                                                                                                                                                                                                                                                                                                                                                                                                 |
| YKL087C        | [CYT2] Cytochrome c1 heme lyase, involved in maturation of cytochrome c1, which is a subunit of the mitochondrial ubiquinol-cytochrome-c reductase; links heme covalently to apocytochrome c1 cytochrome c1 heme lyase (CC1HL)                                                                                                                                                                                                  |
| YLR285W        | [NNT1] Putative nicotinamide N-methyltransferase, has a role in rDNA silencing and in lifespan determination Putative nicotinamide N-methyltransferase Null: Decreased rDNA and telomeric silencing. Other phenotypes: Overexpression increases silencing and Sir2 activity                                                                                                                                                     |
| 0554           | GO_TERM:[phosphatase regulator activity] P-Value:2.9e-04 OVERLAP:[Serine/threonine phosphoprotein phosphatase] <450> SIZE:6                                                                                                                                                                                                                                                                                                     |
| YHR194W        | [MDM31] Mitochondrial inner membrane protein with similarity to Mdm32p, required for normal mitochondrial morphology and inheritance; interacts genetically with MMM1, MDM10, MDM12, and MDM34                                                                                                                                                                                                                                  |

|                |                                                                                                                                                                                                                                                                                                                                                                                                                                                                                                                                                                                                                                            |
|----------------|--------------------------------------------------------------------------------------------------------------------------------------------------------------------------------------------------------------------------------------------------------------------------------------------------------------------------------------------------------------------------------------------------------------------------------------------------------------------------------------------------------------------------------------------------------------------------------------------------------------------------------------------|
| YOR147W        | [MDM32] Mitochondrial inner membrane protein with similarity to Mdm31p, required for normal mitochondrial morphology and inheritance; interacts genetically with MMM1, MDM10, MDM12, and MDM34                                                                                                                                                                                                                                                                                                                                                                                                                                             |
| <b>YKL193C</b> | [SDS22] Conserved nuclear regulatory subunit of Glc7p type 1 protein serine-threonine phosphatase (PP1), functions positively with Glc7p to promote dephosphorylation of nuclear substrates required for chromosome transmission during mitosis Glc7p regulatory subunit                                                                                                                                                                                                                                                                                                                                                                   |
| YFR003C        | [YPI1] Inhibitor of the type I protein phosphatase Glc7p, which is involved in regulation of a variety of metabolic processes; overproduction causes decreased cellular content of glycogen PP1 phosphatase inhibitor                                                                                                                                                                                                                                                                                                                                                                                                                      |
| YIL064W        |                                                                                                                                                                                                                                                                                                                                                                                                                                                                                                                                                                                                                                            |
| 0555           |                                                                                                                                                                                                                                                                                                                                                                                                                                                                                                                                                                                                                                            |
| YKL037W        |                                                                                                                                                                                                                                                                                                                                                                                                                                                                                                                                                                                                                                            |
| YML058W        | [SML1] Ribonucleotide reductase inhibitor involved in regulating dNTP production; regulated by Mec1p and Rad53p during DNA damage and S phase Null mutant is viable and suppresses mec1 and rad53 lethality; suppresses mip1-1 at 37 C, suppresses dun1 DNA damage sensitivity; increased resistance to DNA damage; increased dNTP pools                                                                                                                                                                                                                                                                                                   |
| 0556           | GO_TERM:[ribonucleoside-diphosphate reductase activity] P-Value:1.7e-05 OVERLAP:[Ribonucleoside-diphosphate reductase] <430> SIZE:4                                                                                                                                                                                                                                                                                                                                                                                                                                                                                                        |
| YOR229W        | [WTM2] Transcriptional repressor involved in regulation of meiosis and silencing; contains WD repeats transcriptional modulator                                                                                                                                                                                                                                                                                                                                                                                                                                                                                                            |
| YOR230W        | [WTM1] Transcriptional repressor involved in regulation of meiosis and silencing; contains WD repeats transcriptional modulator                                                                                                                                                                                                                                                                                                                                                                                                                                                                                                            |
| <b>YGR180C</b> | [RNR4] Ribonucleotide-diphosphate reductase (RNR), small subunit; the RNR complex catalyzes the rate-limiting step in dNTP synthesis and is regulated by DNA replication and DNA damage checkpoint pathways via localization of the small subunits ribonucleotide reductase, small (R2) subunit Null mutant is inviable in the W303 strain background, but viable and sick in another (Wang et al.[1997] Mol. Cell Biol.17:6114-6121). An rnr4 mutant is resistant to 40 ug/ml benomyl, supersensitive to hydroxyurea (HU)[dead at 0.005M HU], and cold sensitive [cells arrest at 14 deg. C. with a large bud and short mitotic spindle]. |
| <b>YJL026W</b> | [RNR2] Ribonucleotide-diphosphate reductase (RNR), small subunit; the RNR complex catalyzes the rate-limiting step in dNTP synthesis and is regulated by DNA replication and DNA damage checkpoint pathways via localization of the small subunits ribonucleotide reductase subunit ribonucleotide reductase, small (R2) subunit                                                                                                                                                                                                                                                                                                           |
| 0557           | GO_TERM:[catalytic activity] P-Value:7.3e-02                                                                                                                                                                                                                                                                                                                                                                                                                                                                                                                                                                                               |
| YOR190W        | [SPR1] Sporulation-specific exo-1,3-beta-glucanase; contributes to ascospore thermoresistance exo-1,3-beta-glucanase, sporulation-specific Fail to hydrolyze p-nitrophenyl-beta-D-glucanase or laminarin; mutant spores exhibit reduced thermoresistance                                                                                                                                                                                                                                                                                                                                                                                   |
| YPR033C        | [HTS1] Cytoplasmic and mitochondrial histidine tRNA synthetase; encoded by a single nuclear gene that specifies two messages; efficient mitochondrial localization requires both a presequence and an amino-terminal sequence histidine-tRNA ligase Certain mutations can be made to disrupt either cytoplasmic or mitochondrial form of Hts1p; loss of mitochondrial synthetase gives Pet- phenotype; loss of cytoplasmic synthetase can result in lethality or respiratory deficiency                                                                                                                                                    |
| 0558           | GO_TERM:[catalytic activity] P-Value:1.8e-01 OVERLAP:[tRNA splicing] <440.30.30> SIZE:11                                                                                                                                                                                                                                                                                                                                                                                                                                                                                                                                                   |
| YNR008W        | [LRO1] Acyltransferase that catalyzes diacylglycerol esterification; one of several acyltransferases that contribute to triglyceride synthesis; putative homolog of human lecithin cholesterol acyltransferase phospholipid:diacylglycerol acyltransferase                                                                                                                                                                                                                                                                                                                                                                                 |
| YIL037C        | [PRM2] Pheromone-regulated protein, predicted to have 4 transmembrane segments and a coiled coil domain; regulated by Ste12p                                                                                                                                                                                                                                                                                                                                                                                                                                                                                                               |
| <b>YMR059W</b> | [SEN15] Subunit of the tRNA splicing endonuclease, which is composed of Sen2p, Sen15p, Sen34p, and Sen54p tetrameric tRNA splicing endonuclease 15kDa subunit                                                                                                                                                                                                                                                                                                                                                                                                                                                                              |
| 0559           | GO_TERM:[mitochondrial signaling pathway] P-Value:5.1e-04 OVERLAP:[RTG complex] <510.190.130> SIZE:2                                                                                                                                                                                                                                                                                                                                                                                                                                                                                                                                       |
| YOR344C        | [TYE7] Serine-rich protein that contains a basic-helix-loop-helix (bHLH) DNA binding motif; binds E-boxes of glycolytic genes and contributes to their activation; may function as a transcriptional activator in Ty1-mediated gene expression Null mutant is viable; expression of enolase genes is reduced three-fivefold in null mutant; gcr1 tye7 double deletion mutants exhibit additive defects in enolase expression. TYE7 was isolated as a dominant suppressor of gcr1 mutations                                                                                                                                                 |
| YER167W        | [BCK2] Protein rich in serine and threonine residues involved in protein kinase C signaling pathway, which controls cell integrity; overproduction suppresses pkc1 mutations                                                                                                                                                                                                                                                                                                                                                                                                                                                               |
| YLR422W        |                                                                                                                                                                                                                                                                                                                                                                                                                                                                                                                                                                                                                                            |
| YMR317W        |                                                                                                                                                                                                                                                                                                                                                                                                                                                                                                                                                                                                                                            |
| YOL108C        | [INO4] Transcription factor required for derepression of inositol-choline-regulated genes involved in phospholipid synthesis; forms a complex, with Ino2p, that binds the inositol-choline-responsive element through a basic helix-loop-helix domain basic helix-loop-helix (bHLH) protein The null mutant is viable but auxotrophic for inositol and choline. The null mutant expresses repressed levels of inositol-1-phosphate synthase (INO1) mRNA and exhibits reduced phosphatidylcholine biosynthesis.                                                                                                                             |
| <b>YBL103C</b> | [RTG3] Basic helix-loop-helix-leucine zipper (bHLH/Zip) transcription factor that forms a complex with another bHLH/Zip protein, Rtg1p, to activate the retrograde (RTG) and TOR pathways phosphoprotein                                                                                                                                                                                                                                                                                                                                                                                                                                   |

|                |                                                                                                                                                                                                                                                                                                                                                                                                                                                                                                                                                                                           |
|----------------|-------------------------------------------------------------------------------------------------------------------------------------------------------------------------------------------------------------------------------------------------------------------------------------------------------------------------------------------------------------------------------------------------------------------------------------------------------------------------------------------------------------------------------------------------------------------------------------------|
| <b>YOL067C</b> | [RTG1] Transcription factor (bHLH) involved in interorganelle communication between mitochondria, peroxisomes, and nucleus transcription factor Null mutant is viable but cannot grow on acetate as the sole carbon source, is a glutamate and aspartate auxotroph, and shows decreased citrate synthase, acetyl-CoA synthetase, NAD isocitrate dehydrogenase, and pyruvate carboxylase activities                                                                                                                                                                                        |
| 0560           | GO_TERM:[biological_process] P-Value:9.6e-02                                                                                                                                                                                                                                                                                                                                                                                                                                                                                                                                              |
| YDR128W        |                                                                                                                                                                                                                                                                                                                                                                                                                                                                                                                                                                                           |
| YER182W        | [YER182W] The authentic, non-tagged protein was localized to the mitochondria                                                                                                                                                                                                                                                                                                                                                                                                                                                                                                             |
| 0561           | GO_TERM:[molecular_function] P-Value:5.5e-01                                                                                                                                                                                                                                                                                                                                                                                                                                                                                                                                              |
| YFR021W        | [ATG18] Phosphatidylinositol 3,5-bisphosphate-binding protein of the vacuolar membrane, predicted to fold as a seven-bladed beta-propeller; required for recycling of Atg9p through the pre-autophagosomal structure (NMR1)Null mutant is viable; arrests with 2C DNA content after shift to sporulation medium.                                                                                                                                                                                                                                                                          |
| YFR029W        | [PTR3] Component of the SPS plasma membrane amino acid sensor system (Ssy1p-Ptr3p-Ssy5p), which senses external amino acid concentration and transmits intracellular signals that result in regulation of expression of amino acid permease genes Null mutant is viable, resistant to toxic dipeptides and the toxic amino acid analogs ethionine and f-phenylalanine in presence of ammonium. Depressed rate of uptake of di-/tripeptides. Other mutant alleles characterized exhibit the same phenotype as the null mutant. Sensitive to sulfonylurea herbicides on complex media (YPD) |
| YHR207C        | [SET5] Zinc-finger protein of unknown function, contains one canonical and two unusual fingers in unusual arrangements; deletion enhances replication of positive-strand RNA virus                                                                                                                                                                                                                                                                                                                                                                                                        |
| YPL258C        | [THI21] Hydroxymethylpyrimidine phosphate kinase, involved in the last steps in thiamine biosynthesis; member of a gene family with THI20 and THI22; functionally redundant with Thi20p null mutant is viable; the double deletion of YOL055c and YPL258c renders the cells auxotrophic for thiamine                                                                                                                                                                                                                                                                                      |
| 0562           | GO_TERM:[catalytic activity] P-Value:1.8e-01                                                                                                                                                                                                                                                                                                                                                                                                                                                                                                                                              |
| YMR315W        |                                                                                                                                                                                                                                                                                                                                                                                                                                                                                                                                                                                           |
| YMR087W        |                                                                                                                                                                                                                                                                                                                                                                                                                                                                                                                                                                                           |
| YNL135C        | [FPR1] Peptidyl-prolyl cis-trans isomerase (PPIase), binds to the drugs FK506 and rapamycin; also binds to the nonhistone chromatin binding protein Hmo1p and may regulate its assembly or function peptidyl-prolyl cis-trans isomerase (PPIase)                                                                                                                                                                                                                                                                                                                                          |
| 0563           | GO_TERM:[molecular_function] P-Value:5.5e-01                                                                                                                                                                                                                                                                                                                                                                                                                                                                                                                                              |
| YBR212W        | [NGR1] RNA binding protein that negatively regulates growth rate; interacts with the 3' UTR of the mitochondrial porin (POR1) mRNA and enhances its degradation; overexpression impairs mitochondrial function; expressed in stationary phase glucose-repressible RNA binding protein Null mutant is viable and shows increased cell growth rate in early log phase                                                                                                                                                                                                                       |
| YIR037W        | [HYR1] Thiol peroxidase that functions as a hydroperoxide receptor to sense intracellular hydroperoxide levels and transduce a redox signal to the Yap1p transcription factor glutathione-peroxidase (putative) Null mutant is hypersensitive to oxidative stress                                                                                                                                                                                                                                                                                                                         |
| YBL081W        |                                                                                                                                                                                                                                                                                                                                                                                                                                                                                                                                                                                           |
| YDL167C        | [NRP1] Protein of unknown function, rich in asparagine residues                                                                                                                                                                                                                                                                                                                                                                                                                                                                                                                           |
| 0564           | GO_TERM:[cellular carbohydrate metabolism] P-Value:7.5e-03                                                                                                                                                                                                                                                                                                                                                                                                                                                                                                                                |
| YLR300W        | [EXG1] Major exo-1,3-beta-glucanase of the cell wall, involved in cell wall beta-glucan assembly; exists as three differentially glycosylated isoenzymes exo-1,3-beta-glucanase Null mutant is viable, displays modest increase in killer toxin sensitivity and beta 1,6-glucan levels                                                                                                                                                                                                                                                                                                    |
| YOL126C        | [MDH2] Cytoplasmic malate dehydrogenase, one of the three isozymes that catalyze interconversion of malate and oxaloacetate; involved in gluconeogenesis during growth on ethanol or acetate as carbon source; interacts with Pck1p and Fbp1p malate dehydrogenase Null mutant is viable; fails to grow on minimal medium with acetate or ethanol as carbon source                                                                                                                                                                                                                        |
| 0565           | GO_TERM:[transcription] P-Value:5.5e-01                                                                                                                                                                                                                                                                                                                                                                                                                                                                                                                                                   |
| YHR044C        | [DOG1] 2-deoxyglucose-6-phosphate phosphatase, similar to Dog2p, member of a family of low molecular weight phosphatases; confers 2-deoxyglucose resistance when overexpressed, in vivo substrate has not yet been identified 2-deoxyglucose-6-phosphate phosphatase                                                                                                                                                                                                                                                                                                                      |
| YIL128W        | [MET18] DNA repair and TFIIH regulator, required for both nucleotide excision repair (NER) and RNA polymerase II (RNAP II) transcription; involved in telomere maintenance TFIIH regulator Null mutant is viable but is temperature-sensitive, defective in ability to remove UV induced dimers from nuclear DNA, and shows enhanced UV-induced mutations; extracts from mutant exhibit thermolabile defect in RNA Pol II transcription; methionine auxotroph                                                                                                                             |
| YDR219C        | [MFB1] Mitochondria-associated F-box protein involved in maintenance of normal mitochondrial morphology                                                                                                                                                                                                                                                                                                                                                                                                                                                                                   |
| YDR267C        | [CIA1] Essential protein involved in assembly of cytosolic and nuclear iron-sulfur proteins                                                                                                                                                                                                                                                                                                                                                                                                                                                                                               |
| YHR122W        |                                                                                                                                                                                                                                                                                                                                                                                                                                                                                                                                                                                           |

|           |                                                                                                                                                                                                                                                                                                                                                                                                                                                                                                      |
|-----------|------------------------------------------------------------------------------------------------------------------------------------------------------------------------------------------------------------------------------------------------------------------------------------------------------------------------------------------------------------------------------------------------------------------------------------------------------------------------------------------------------|
| 0566      | GO_TERM:[generation of precursor metabolites and energy] P-Value:8.5e-03                                                                                                                                                                                                                                                                                                                                                                                                                             |
| Q0050     | [AI1] Reverse transcriptase required for splicing of the COX1 pre-mRNA, encoded by a mobile group II intron within the mitochondrial COX1 gene intron-specific reverse transcriptase activity/maturase a11 unable to excise adjacent a12 intron; reduced intron mobility                                                                                                                                                                                                                             |
| YPR140W   | [TAZ1] Lyso-phosphatidylcholine acyltransferase, required for normal phospholipid content of mitochondrial membranes; may remodel acyl groups of cardiolipin in the inner membrane; similar to human tafazzin, which is implicated in Barth syndrome                                                                                                                                                                                                                                                 |
| 0567      | GO_TERM:[catalytic activity] P-Value:1.8e-01                                                                                                                                                                                                                                                                                                                                                                                                                                                         |
| YMR217W   | [GUA1] GMP synthase, an enzyme that catalyzes the second step in the biosynthesis of GMP from inosine 5'-phosphate (IMP); transcription is not subject to regulation by guanine but is negatively regulated by nutrient starvation GMP synthase Null mutant is viable but is a guanine auxotroph                                                                                                                                                                                                     |
| YAL024C   | [LTE1] Putative GDP/GTP exchange factor required for mitotic exit at low temperatures; acts as a guanine nucleotide exchange factor (GEF) for Tem1, which is a key regulator of mitotic exit; physically associates with Ras2p-GTP lethal at low temperature (8 degrees C)                                                                                                                                                                                                                           |
| YDR232W   | [HEM1] 5-aminolevulinic acid synthase, catalyzes the first step in the heme biosynthetic pathway; an N-terminal signal sequence is required for localization to the mitochondrial matrix; expression is regulated by Hap2p-Hap3p 5-aminolevulinic acid synthase Null mutant is viable; auxotroph for heme and methionine                                                                                                                                                                             |
| 0568      | GO_TERM:[chromosome organization and biogenesis (sensu Eukaryota)] P-Value:4.7e-01                                                                                                                                                                                                                                                                                                                                                                                                                   |
| YBR066C   | [NRG2] Transcriptional repressor that mediates glucose repression and negatively regulates filamentous growth; has similarity to Nrg1p NRG1 homolog Null mutant is viable with no detected phenotypes                                                                                                                                                                                                                                                                                                |
| YKR015C   |                                                                                                                                                                                                                                                                                                                                                                                                                                                                                                      |
| YBL015W   | [ACH1] Acetyl-coA hydrolase, primarily localized to mitochondria; required for acetate utilization and for diploid pseudohyphal growth acetyl CoA hydrolase                                                                                                                                                                                                                                                                                                                                          |
| YGR161C-C |                                                                                                                                                                                                                                                                                                                                                                                                                                                                                                      |
| YCR082W   | [AHC2] Protein of unknown function, putative transcriptional regulator; proposed to be a Ada Histone acetyltransferase complex component; GFP tagged protein is localized to the cytoplasm and nucleus                                                                                                                                                                                                                                                                                               |
| YOR023C   | [AHC1] Subunit of the Ada histone acetyltransferase complex, required for structural integrity of the complex Ada histone acetyltransferase complex component                                                                                                                                                                                                                                                                                                                                        |
| 0569      | GO_TERM:[phosphogluconate dehydrogenase (decarboxylating) activity] P-Value:1.2e-06                                                                                                                                                                                                                                                                                                                                                                                                                  |
| YDL200C   | [MGT1] DNA repair methyltransferase (6-O-methylguanine-DNA methylase) involved in protection against DNA alkylation damage 6-O-methylguanine-DNA methylase Null mutant is viable, sensitive to alkylation induced killing and mutation                                                                                                                                                                                                                                                               |
| YNL014W   | [HEF3] Translational elongation factor EF-3; paralog of YEF3 and member of the ABC superfamily; stimulates EF-1 alpha-dependent binding of aminoacyl-tRNA by the ribosome; normally expressed in zinc deficient cells Translation elongation factor 3 (EF-3)                                                                                                                                                                                                                                         |
| YGR256W   | [GND2] 6-phosphogluconate dehydrogenase (decarboxylating), catalyzes an NADPH regenerating reaction in the pentose phosphate pathway; required for growth on D-glucono-delta-lactone 6-phosphogluconate dehydrogenase                                                                                                                                                                                                                                                                                |
| YHR183W   | [GND1] 6-phosphogluconate dehydrogenase (decarboxylating), catalyzes an NADPH regenerating reaction in the pentose phosphate pathway; required for growth on D-glucono-delta-lactone and adaptation to oxidative stress 6-phosphogluconate dehydrogenase                                                                                                                                                                                                                                             |
| 0570      | GO_TERM:[response to stress] P-Value:2.8e-02                                                                                                                                                                                                                                                                                                                                                                                                                                                         |
| YDL101C   | [DUN1] Cell-cycle checkpoint serine-threonine kinase required for DNA damage-induced transcription of certain target genes, phosphorylation of Rad55p and Sml1p, and transient G2/M arrest after DNA damage; also regulates postreplicative DNA repair protein kinase Null mutant is viable, defective in DNA damage repair and DNA damage-responsive induction of RNR genes, and sensitive to DNA damaging agents. dun1pan2 and dun1pan3 double mutants are hypersensitive to replicational stress. |
| YJR104C   | [SOD1] Cu, Zn superoxide dismutase; some mutations are analogous to those that cause ALS (amyotrophic lateral sclerosis) in humans Cu, Zn superoxide dismutase Null mutant is viable; dioxygen and paraquat sensitive; fails to grow on lactate as a carbon source; exhibits increased copper sensitivity; exhibits slower proliferation time due to increased length of G1; methionine auxotroph and oxygen sensitive; SOD1 is required for sporulation                                             |
| 0571      | GO_TERM:[molecular_function] P-Value:3.7e-01                                                                                                                                                                                                                                                                                                                                                                                                                                                         |

|         |                                                                                                                                                                                                                                                                                                                                                                                                                                                                                                                                                                     |
|---------|---------------------------------------------------------------------------------------------------------------------------------------------------------------------------------------------------------------------------------------------------------------------------------------------------------------------------------------------------------------------------------------------------------------------------------------------------------------------------------------------------------------------------------------------------------------------|
| YLR098C | [CHA4] DNA binding transcriptional activator, mediates serine/threonine activation of the catabolic L-serine (L-threonine) deaminase (CHA1); Zinc-finger protein with Zn[2]-Cys[6] fungal-type binuclear cluster domain DNA binding transcriptional activator of CHA1 Unable to grow with serine or threonine as the sole nitrogen source, suppresses <i>ilv1</i> mutant by causing inducer-independent, constitutive expression of CHA1                                                                                                                            |
| YKL047W |                                                                                                                                                                                                                                                                                                                                                                                                                                                                                                                                                                     |
| YPL130W | [SPO19] Meiosis-specific protein of unknown function, involved in completion of nuclear divisions; identified as a weak high-copy suppressor of the <i>spo1-1 ts</i> mutation; putative GPI-dependent cell-wall protein meiosis-specific GPI-protein Null mutant is viable; unable to form spores                                                                                                                                                                                                                                                                   |
| 0572    | GO_TERM:[acetyl-CoA carboxylase activity] P-Value:2.3e-06                                                                                                                                                                                                                                                                                                                                                                                                                                                                                                           |
| YMR207C | [HFA1] Mitochondrial acetyl-coenzyme A carboxylase, catalyzes the production of malonyl-CoA in mitochondrial fatty acid biosynthesis                                                                                                                                                                                                                                                                                                                                                                                                                                |
| YNR016C | [ACC1] Acetyl-CoA carboxylase, biotin containing enzyme that catalyzes the carboxylation of acetyl-CoA to form malonyl-CoA; required for de novo biosynthesis of long-chain fatty acids acetyl CoA carboxylase <i>acc1</i> spores fail to enter vegetative growth                                                                                                                                                                                                                                                                                                   |
| YGR066C |                                                                                                                                                                                                                                                                                                                                                                                                                                                                                                                                                                     |
| YGR061C | [ADE6] Formylglycinamide-ribonucleotide (FGAM)-synthetase, catalyzes a step in the 'de novo' purine nucleotide biosynthetic pathway 5'-phosphoribosylformyl glycinamide synthetase Adenine requiring                                                                                                                                                                                                                                                                                                                                                                |
| YLR386W | [VAC14] Protein involved in regulated synthesis of PtdIns(3,5)P(2), in control of trafficking of some proteins to the vacuole lumen via the MVB, and in maintenance of vacuole size and acidity; activator of Fab1p Activator of Fab1p Null mutant has extremely enlarged vacuoles, is defective in vacuole membrane scission, has a vacuole acidification defect, and is defective in phosphatidylinositol 3,5 bispophosphate synthesis                                                                                                                            |
| 0573    | GO_TERM:[calcium-dependent protein serine/threonine phosphatase activity] P-Value:1.4e-09 OVERLAP:[Calcineurin B] <100> SIZE:3                                                                                                                                                                                                                                                                                                                                                                                                                                      |
| YDR184C | [ATC1] Nuclear protein, possibly involved in regulation of cation stress responses and/or in the establishment of bipolar budding pattern                                                                                                                                                                                                                                                                                                                                                                                                                           |
| YOR324C | [FRT1] Tail-anchored endoplasmic reticulum membrane protein that is a substrate of the phosphatase calcineurin, interacts with homolog <i>Frt2p</i> , promotes cell growth in conditions of high Na <sup>+</sup> , alkaline pH, and cell wall stress                                                                                                                                                                                                                                                                                                                |
| YKL190W | [CNB1] Calcineurin B; the regulatory subunit of calcineurin, a Ca <sup>++</sup> /calmodulin-regulated protein phosphatase which regulates <i>Crz1p</i> (a stress-response transcription factor), the other calcineurin subunit is encoded by <i>CNA1</i> and/or <i>CMP1</i> calcineurin regulatory B subunit/type 2B protein phosphatase Null mutant is viable, Li <sup>+</sup> and Na <sup>+</sup> sensitive, <i>cnb1 fks1</i> and <i>cnb1 vma3</i> double mutants are inviable                                                                                    |
| YLR433C | [CNA1] Calcineurin A; one isoform (the other is <i>CMP2</i> ) of the catalytic subunit of calcineurin, a Ca <sup>++</sup> /calmodulin-regulated protein phosphatase which regulates <i>Crz1p</i> (a stress-response transcription factor), the other calcineurin subunit is <i>CNB1</i> calcineurin subunit A                                                                                                                                                                                                                                                       |
| YML057W | [CMP2] Calcineurin A; one isoform (the other is <i>CNA1</i> ) of the catalytic subunit of calcineurin, a Ca <sup>++</sup> /calmodulin-regulated protein phosphatase which regulates <i>Crz1p</i> (a stress-response transcription factor), the other calcineurin subunit is <i>CNB1</i> calcineurin subunit A                                                                                                                                                                                                                                                       |
| 0574    | GO_TERM:[catalytic activity] P-Value:7.3e-02                                                                                                                                                                                                                                                                                                                                                                                                                                                                                                                        |
| YLR345W |                                                                                                                                                                                                                                                                                                                                                                                                                                                                                                                                                                     |
| YOR219C | [STE13] Dipeptidyl aminopeptidase, Golgi integral membrane protein that cleaves on the carboxyl side of repeating -X-Ala- sequences, required for maturation of alpha factor, transcription is induced by a-factor dipeptidyl aminopeptidase Null mutant is viable, sporulation proficient                                                                                                                                                                                                                                                                          |
| 0575    |                                                                                                                                                                                                                                                                                                                                                                                                                                                                                                                                                                     |
| YDR379W | [RGA2] GTPase-activating protein for the polarity-establishment protein <i>Cdc42p</i> ; implicated in control of septin organization, pheromone response, and haploid invasive growth Rho-GTPase Activating Protein Null mutants are viable but increase the restrictive temperature of a <i>cdc24-4</i> strain and increase the constitutive activation of the pheromone response pathway in conjunction with mutations in <i>RGAI</i> and <i>BEM3</i> ; overexpression of <i>RGA2</i> causes a decrease in the restrictive temperature of a <i>cdc42-1</i> strain |
| YKR009C | [FOX2] Multifunctional enzyme of the peroxisomal fatty acid beta-oxidation pathway; has 3-hydroxyacyl-CoA dehydrogenase and enoyl-CoA hydratase activities multifunctional beta-oxidation protein mutant lacks 2-enoyl-CoA hydratase and D-3-hydroxyacyl-CoA dehydrogenase activities                                                                                                                                                                                                                                                                               |
| 0576    | GO_TERM:[biological_process] P-Value:3.0e-02                                                                                                                                                                                                                                                                                                                                                                                                                                                                                                                        |
| YPL105C |                                                                                                                                                                                                                                                                                                                                                                                                                                                                                                                                                                     |
| YBR302C | [COS2] Protein of unknown function, member of the DUP380 subfamily of conserved, often subtelomerically-encoded proteins                                                                                                                                                                                                                                                                                                                                                                                                                                            |
| YPR063C |                                                                                                                                                                                                                                                                                                                                                                                                                                                                                                                                                                     |
| 0577    | GO_TERM:[nucleus] P-Value:6.9e-01                                                                                                                                                                                                                                                                                                                                                                                                                                                                                                                                   |

|                |                                                                                                                                                                                                                                                                                                                                                                                                                                                                                                                                                                                                     |
|----------------|-----------------------------------------------------------------------------------------------------------------------------------------------------------------------------------------------------------------------------------------------------------------------------------------------------------------------------------------------------------------------------------------------------------------------------------------------------------------------------------------------------------------------------------------------------------------------------------------------------|
| YDR315C        | [IPK1] Inositol 1,3,4,5,6-pentakisphosphate 2-kinase, nuclear protein required for synthesis of 1,2,3,4,5,6-hexakisphosphate (phytate), which is integral to cell function; has 2 motifs conserved in other fungi; ipk1 gle1 double mutant is inviable inositol 1,3,4,5,6-pentakisphosphate 2-kinase Null mutant is viable but is severely compromised in ability to produce IP6 (100x decrease); null has 100x greater amounts of IP5 and PP-IP4; null also has increased IP3 and IP4; synthetic lethal with gle1-4 (GSL); null has mRNA export defects, fails to grow at 37C after 10 generations |
| YLR323C        | [CWC24] Essential protein, component of a complex containing Cef1p; has similarity to <i>S. pombe</i> Cwf24p                                                                                                                                                                                                                                                                                                                                                                                                                                                                                        |
| 0578           | GO_TERM:[biological_process] P-Value:9.6e-02                                                                                                                                                                                                                                                                                                                                                                                                                                                                                                                                                        |
| YDR415C        |                                                                                                                                                                                                                                                                                                                                                                                                                                                                                                                                                                                                     |
| YOR305W        |                                                                                                                                                                                                                                                                                                                                                                                                                                                                                                                                                                                                     |
| 0579           |                                                                                                                                                                                                                                                                                                                                                                                                                                                                                                                                                                                                     |
| YBR004C        | [GPI18] Functional ortholog of human PIG-V, which is a mannosyltransferase that transfers the second mannose in glycosylphosphatidylinositol biosynthesis; the authentic, non-tagged protein was localized to mitochondria mannosyltransferase                                                                                                                                                                                                                                                                                                                                                      |
| YLR082C        | [SRL2] Protein of unknown function; overexpression suppresses the lethality caused by a rad53 null mutation                                                                                                                                                                                                                                                                                                                                                                                                                                                                                         |
| 0580           | OVERLAP:[cytoplasmic ribosomal large subunit] <500.40.10> SIZE:81                                                                                                                                                                                                                                                                                                                                                                                                                                                                                                                                   |
| YBR006W        | [UGA2] Succinate semialdehyde dehydrogenase involved in the utilization of gamma-aminobutyrate (GABA) as a nitrogen source; part of the 4-aminobutyrate and glutamate degradation pathways; localized to the cytoplasm succinate semialdehyde dehydrogenase Null mutant is viable but cannot grow with GABA as the only nitrogen source.                                                                                                                                                                                                                                                            |
| <b>YDR382W</b> | [RPP2B] Ribosomal protein P2 beta, a component of the ribosomal stalk, which is involved in the interaction between translational elongation factors and the ribosome; regulates the accumulation of P1 (Rpp1Ap and Rpp1Bp) in the cytoplasm ribosomal protein P2B (YP2beta) (L45) Null mutant is viable. Overexpression affects cell growth by interfering with the joining of the 60S subunit to the initiation complex generating the accumulation of polysome half-mers.                                                                                                                        |
| 0581           | GO_TERM:[commitment complex] P-Value:1.2e-04 OVERLAP:[Actin-associated motorproteins] <140.20.30> SIZE:7                                                                                                                                                                                                                                                                                                                                                                                                                                                                                            |
| <b>YBR172C</b> | [SMY2] Protein of unknown function that interacts with Myo2p; has similarity to <i>S. pombe</i> Mpd2                                                                                                                                                                                                                                                                                                                                                                                                                                                                                                |
| YKL074C        | [MUD2] Protein involved in early pre-mRNA splicing; component of the pre-mRNA-U1 snRNP complex, the commitment complex; interacts with Msl5p/BBP splicing factor and Sub2p; similar to metazoan splicing factor U2AF65                                                                                                                                                                                                                                                                                                                                                                              |
| YLR116W        | [MSL5] Component of the commitment complex, which defines the first step in the splicing pathway; essential protein that interacts with Mud2p and Prp40p, forming a bridge between the intron ends; also involved in nuclear retention of pre-mRNA                                                                                                                                                                                                                                                                                                                                                  |
| 0582           | GO_TERM:[spliceosome complex] P-Value:2.0e-03                                                                                                                                                                                                                                                                                                                                                                                                                                                                                                                                                       |
| YNL286W        | [CUS2] Protein that binds to U2 snRNA and Prp11p, may be involved in U2 snRNA folding; contains two RNA recognition motifs (RRMs) Null mutant is viable, enhances U2 mutations; mutations in this gene suppress the cold sensitive phenotype of U2 RNA mutation G53A                                                                                                                                                                                                                                                                                                                                |
| YOR148C        | [SPP2] Essential protein that promotes the first step of splicing and is required for the final stages of spliceosome maturation; interacts with Prp2p, which may release Spp2p from the spliceosome following the first cleavage reaction Null mutant is inviable. Depletion of Spp2p from yeast cells results in accumulation of unspliced pre-mRNAs. A temperature-sensitive spp2-1 mutant accumulates pre-mRNAs in vivo and is unable to undergo the first splicing reaction in vitro.                                                                                                          |
| 0583           | OVERLAP:[cytoplasmic ribosomal small subunit] <500.40.20> SIZE:57                                                                                                                                                                                                                                                                                                                                                                                                                                                                                                                                   |
| YBR094W        |                                                                                                                                                                                                                                                                                                                                                                                                                                                                                                                                                                                                     |
| <b>YOR167C</b> | [RPS28A] Protein component of the small (40S) ribosomal subunit; nearly identical to Rps28Ap and has similarity to rat S28 ribosomal protein ribosomal protein S28A (S33A) (YS27)                                                                                                                                                                                                                                                                                                                                                                                                                   |
| 0584           | GO_TERM:[mRNA export from nucleus] P-Value:2.7e-03                                                                                                                                                                                                                                                                                                                                                                                                                                                                                                                                                  |
| YGL174W        | [BUD13] Subunit of the RES complex, which is required for nuclear pre-mRNA retention and splicing; involved in bud-site selection; diploid mutants display a unipolar budding pattern instead of the wild-type bipolar pattern Null mutant is viable; diploid null mutants exhibit unipolar budding and elongate phenotype.                                                                                                                                                                                                                                                                         |
| YLR016C        | [PML1] Subunit of the RES complex, which is required for nuclear retention of unspliced pre-mRNAs; acts in the same pathway as Pml39p and Mlp1p                                                                                                                                                                                                                                                                                                                                                                                                                                                     |

|           |                                                                                                                                                                                                                                                                                                                                                                                                                                                                                                                                                                                                                                                                                                                                                                                                                  |
|-----------|------------------------------------------------------------------------------------------------------------------------------------------------------------------------------------------------------------------------------------------------------------------------------------------------------------------------------------------------------------------------------------------------------------------------------------------------------------------------------------------------------------------------------------------------------------------------------------------------------------------------------------------------------------------------------------------------------------------------------------------------------------------------------------------------------------------|
| 0585      | GO_TERM:[snRNP U2] P-Value:1.1e-07                                                                                                                                                                                                                                                                                                                                                                                                                                                                                                                                                                                                                                                                                                                                                                               |
| YOR319W   | [HSH49] U2-snRNP associated splicing factor with similarity to the mammalian splicing factor SAP49; proposed to function as a U2-snRNP assembly factor along with Hsh155p and binding partner Cus1p; contains two RNA recognition motifs (RRM) mammalian splicing factor/U2 snRNP protein homolog                                                                                                                                                                                                                                                                                                                                                                                                                                                                                                                |
| YIR005W   | [IST3] Component of the U2 snRNP, required for the first catalytic step of splicing and for spliceosomal assembly; interacts with Rds3p and is required for Mer1p-activated splicing Null mutant is viable but exhibits slow growth and a pre-mRNA splicing defect in vivo and in vitro. Deletion caused an immediate and exclusive accumulation of a particle consistent with a pre-mRNA/penta-snRNP complex.                                                                                                                                                                                                                                                                                                                                                                                                   |
| YPR094W   | [RDS3] Zinc cluster protein involved in pre-mRNA splicing and cycloheximide resistance                                                                                                                                                                                                                                                                                                                                                                                                                                                                                                                                                                                                                                                                                                                           |
| 0586      | GO_TERM:[RNA splicing factor activity, transesterification mechanism] P-Value:1.8e-06                                                                                                                                                                                                                                                                                                                                                                                                                                                                                                                                                                                                                                                                                                                            |
| YGR129W   | [SYF2] Component of the spliceosome complex involved in pre-mRNA splicing; involved in regulation of cell cycle progression                                                                                                                                                                                                                                                                                                                                                                                                                                                                                                                                                                                                                                                                                      |
| YBR188C   | [NTC20] Member of a complex, including Prp19p, that binds to the spliceosome; required for pre-mRNA splicing splicing factor Null mutant is viable. ntc20 ntc30 double mutant is very sick and accumulates pre-mRNA. Null mutant is synthetically lethal with prp19.                                                                                                                                                                                                                                                                                                                                                                                                                                                                                                                                             |
| YJR050W   | [ISY1] Component of the spliceosome complex involved in pre-mRNA splicing, auxiliary splicing factor that may modulate Syf1p activity and help optimize splicing; isy1 syf2 double mutation activates the spindle checkpoint, causing cell cycle arrest                                                                                                                                                                                                                                                                                                                                                                                                                                                                                                                                                          |
| 0587      | GO_TERM:[U4/U6 x U5 tri-snRNP complex] P-Value:5.3e-21                                                                                                                                                                                                                                                                                                                                                                                                                                                                                                                                                                                                                                                                                                                                                           |
| YBR055C   | [PRP6] Splicing factor, component of the U4/U6-U5 snRNP complex RNA splicing factor                                                                                                                                                                                                                                                                                                                                                                                                                                                                                                                                                                                                                                                                                                                              |
| YOR308C   | [SNU66] Component of the U4/U6.U5 snRNP complex involved in pre-mRNA splicing via spliceosome; has homology to human SART-1 and to an S. pombe protein; snu66 null mutation confers cold-sensitivity but is not lethal at normal growth temperatures                                                                                                                                                                                                                                                                                                                                                                                                                                                                                                                                                             |
| YPR178W   | [PRP4] Splicing factor, component of the U4/U6-U5 snRNP complex associates with the U4/U6 snRNP Null mutant is inviable; other alleles are defective in RNA synthesis and unable to grow at 36 degrees C.                                                                                                                                                                                                                                                                                                                                                                                                                                                                                                                                                                                                        |
| YJR022W   | [LSM8] Lsm (Like Sm) protein; forms heteroheptameric complex (with Lsm2p, Lsm3p, Lsm4p, Lsm5p, Lsm6p, and Lsm7p) that is part of spliceosomal U6 snRNP and is also implicated in processing of pre-tRNA, pre-snoRNA, and pre-rRNA snRNP protein                                                                                                                                                                                                                                                                                                                                                                                                                                                                                                                                                                  |
| YBL026W   | [LSM2] Lsm (Like Sm) protein; part of heteroheptameric complexes (Lsm2p-7p and either Lsm1p or 8p): cytoplasmic Lsm1p complex involved in mRNA decay; nuclear Lsm8p complex part of U6 snRNP and possibly involved in processing tRNA, snoRNA, and rRNA snRNA-associated protein, Sm class                                                                                                                                                                                                                                                                                                                                                                                                                                                                                                                       |
| YER112W   | [LSM4] Lsm (Like Sm) protein; part of heteroheptameric complexes (Lsm2p-7p and either Lsm1p or 8p): cytoplasmic Lsm1p complex involved in mRNA decay; nuclear Lsm8p complex part of U6 snRNP and possibly involved in processing tRNA, snoRNA, and rRNA U6 snRNA associated protein Null mutant is inviable. LSM4p depleted cells have reduced levels of U6 snRNA                                                                                                                                                                                                                                                                                                                                                                                                                                                |
| YLR438C-A | [LSM3] Lsm (Like Sm) protein; part of heteroheptameric complexes (Lsm2p-7p and either Lsm1p or 8p): cytoplasmic Lsm1p complex involved in mRNA decay; nuclear Lsm8p complex part of U6 snRNP and possibly involved in processing tRNA, snoRNA, and rRNA snRNP protein                                                                                                                                                                                                                                                                                                                                                                                                                                                                                                                                            |
| YDR378C   | [LSM6] Lsm (Like Sm) protein; part of heteroheptameric complexes (Lsm2p-7p and either Lsm1p or 8p): cytoplasmic Lsm1p complex involved in mRNA decay; nuclear Lsm8p complex part of U6 snRNP and possibly involved in processing tRNA, snoRNA, and rRNA snRNP protein                                                                                                                                                                                                                                                                                                                                                                                                                                                                                                                                            |
| YNL147W   | [LSM7] Lsm (Like Sm) protein; part of heteroheptameric complexes (Lsm2p-7p and either Lsm1p or 8p): cytoplasmic Lsm1p complex involved in mRNA decay; nuclear Lsm8p complex part of U6 snRNP and possibly involved in processing tRNA, snoRNA, and rRNA snRNP protein                                                                                                                                                                                                                                                                                                                                                                                                                                                                                                                                            |
| 0588      | GO_TERM:[nuclear mRNA splicing, via spliceosome] P-Value:4.8e-63 OVERLAP:[Prp19p-associated complex] <440.30.10.10> SIZE:3                                                                                                                                                                                                                                                                                                                                                                                                                                                                                                                                                                                                                                                                                       |
| YIL061C   | [SNP1] Component of U1 snRNP required for mRNA splicing via spliceosome; may interact with poly(A) polymerase to regulate polyadenylation; homolog of human U1 70K protein U1snRNP 70K protein homolog Null mutant is inviable in some strain backgrounds and in other strain backgrounds, null mutant is viable, exhibits greatly increased doubling rates, severe temperature sensitivities, and defects in nuclear pre-mRNA splicing                                                                                                                                                                                                                                                                                                                                                                          |
| YKL012W   | [PRP40] U1 snRNP protein involved in splicing, interacts with the branchpoint-binding protein during the formation of the second commitment complex U1 snRNP protein Null mutant is inviable; temperature-sensitive mutants show a splicing defect                                                                                                                                                                                                                                                                                                                                                                                                                                                                                                                                                               |
| YHR086W   | [NAM8] RNA binding protein, component of the U1 snRNP protein; mutants are defective in meiotic recombination and in formation of viable spores, involved in the formation of DSBs through meiosis-specific splicing of MER2 pre-mRNA RNA-binding protein U1 snRNP protein Null mutant is viable; defective in meiotic recombination, formation of viable spores, and formation of meiosis-specific double-strand breaks and crossover and noncrossover recombinants; overexpression suppresses mitochondrial splicing defects; impaired association of yeast-specific U1 snRNP proteins but hyperstabilized association of Snu65p/Prp42p with the U1 snRNP; affects in vivo splicing of introns with non-canonical 5'-splice sites; mutant contains a U1 snRNP with aberrant migration behaviour on native gels |
| YBR119W   | [MUD1] U1 snRNP A protein, homolog of human U1-A; involved in nuclear mRNA splicing U1 snRNP A protein                                                                                                                                                                                                                                                                                                                                                                                                                                                                                                                                                                                                                                                                                                           |
| YML046W   | [PRP39] U1 snRNP protein involved in splicing, contains multiple tetra-tricopeptide repeats RNA splicing factor U1 snRNP protein Temperature-sensitive mutant arrests at the nonpermissive temperature and shows block in pre-mRNA splicing                                                                                                                                                                                                                                                                                                                                                                                                                                                                                                                                                                      |
| YDR235W   | [PRP42] U1 snRNP protein involved in splicing, required for U1 snRNP biogenesis; contains multiple tetra-tricopeptide repeats U1 snRNP protein shares 50% sequence similarity with Prp39p U1 snRNP protein and has multiple copies of the crn-like TPR motif Null mutant is inviable; prp39-1 is a point mutant that is temperature-sensitive for pre-mRNA splicing                                                                                                                                                                                                                                                                                                                                                                                                                                              |

|                |                                                                                                                                                                                                                                                                                                                                                                                                                                                                                                          |
|----------------|----------------------------------------------------------------------------------------------------------------------------------------------------------------------------------------------------------------------------------------------------------------------------------------------------------------------------------------------------------------------------------------------------------------------------------------------------------------------------------------------------------|
| YGR013W        | [SNU71] Component of U1 snRNP required for mRNA splicing via spliceosome; yeast specific, no metazoan counterpart U1 snRNP protein                                                                                                                                                                                                                                                                                                                                                                       |
| YDR240C        | [SNU56] Component of U1 snRNP required for mRNA splicing via spliceosome; yeast specific, no metazoan counterpart; interacts with mRNA in commitment complex U1 snRNP protein Null mutant is inviable; mutation affects the in vitro formation of commitment complexes and spliceosomes and the in vivo splicing efficiency of certain introns.                                                                                                                                                          |
| YLR298C        | [YHC1] Component of the U1 snRNP complex required for pre-mRNA splicing; putative ortholog of human U1C protein, which is involved in formation of a complex between U1 snRNP and the pre-mRNA 5' splice site                                                                                                                                                                                                                                                                                            |
| YBR152W        | [SPP381] mRNA splicing factor, component of U4/U6.U5 tri-snRNP; interacts genetically and physically with Prp38p U4/U6/U5 snRNP-associated protein contains PEST proteolysis motif Null mutant is viable, shows severe growth defect and inhibited cellular pre-mRNA splicing                                                                                                                                                                                                                            |
| YDL030W        | [PRP9] Subunit of the SF3a splicing factor complex, required for spliceosome assembly; acts after the formation of the U1 snRNP-pre-mRNA complex RNA splicing factor                                                                                                                                                                                                                                                                                                                                     |
| YDL087C        | [LUC7] Essential protein associated with the U1 snRNP complex; splicing factor involved in recognition of 5' splice site Null mutant is inviable; luc7 mutants exhibit synthetic lethality with the Cap-Binding Complex                                                                                                                                                                                                                                                                                  |
| YGR091W        | [PRP31] Splicing factor, component of the U4/U6-U5 snRNP complex pre-mRNA splicing protein Null mutant is inviable; temperature-sensitive mutant accumulates unspliced pre-mRNA at the restrictive temperature and is suppressed by multicopy PRP2                                                                                                                                                                                                                                                       |
| YDR473C        | [PRP3] Splicing factor, component of the U4/U6-U5 snRNP complex snRNP from U4/U6 and U5 snRNPs RNA synthesis defective                                                                                                                                                                                                                                                                                                                                                                                   |
| YPL151C        | [PRP46] Splicing factor that is found in the Cef1p subcomplex of the spliceosome pre-mRNA splicing factor                                                                                                                                                                                                                                                                                                                                                                                                |
| YDL209C        | [CWC2] Protein involved in pre-mRNA splicing, component of a complex containing Cef1p; interacts with Prp19p; contains an RNA recognition motif; has similarity to <i>S. pombe</i> Cwf2p Null: required for pre-mRNA splicing                                                                                                                                                                                                                                                                            |
| <b>YPR101W</b> | [SNT309] Component of NineTeen complex (NTC) containing Prp19p involved in mRNA splicing, interacts physically and genetically with Prp19p Null mutant is viable, temperature sensitive, exhibits defects in splicing at elevated temperature; snt309 prp19 mutants are synthetically lethal                                                                                                                                                                                                             |
| YML049C        | [RSE1] Protein involved in pre-mRNA splicing; component of the pre-spliceosome; associates with U2 snRNA; involved in ER to Golgi transport An uncharacterized mutant allele grows slowly and exhibits defects in ER-to-Golgi transport and mRNA splicing.                                                                                                                                                                                                                                               |
| YMR240C        | [CUS1] Protein required for assembly of U2 snRNP into the spliceosome, forms a complex with Hsh49p and Hsh155p U2 snRNP protein suppresses cold sensitivity of a U2 G53A cs mutant                                                                                                                                                                                                                                                                                                                       |
| YMR213W        | [CEF1] Essential splicing factor; associated with Prp19p and the spliceosome, contains an N-terminal c-Myb DNA binding motif necessary for cell viability but not for Prp19p association, evolutionarily conserved and homologous to <i>S. pombe</i> Cdc5p protein complex component associated with the splicing factor Prp19p Null mutant is inviable, arrests in G2/M, exhibits abnormal nuclear morphologies. Essential for mRNA splicing.                                                           |
| YLR117C        | [CLF1] Essential spliceosome assembly factor; contains multiple tetratricopeptide repeat (TPR) protein-binding motifs and interacts specifically with many spliceosome components, may serve as a scaffold during spliceosome assembly pre-mRNA splicing factor Null mutant is inviable; clf1 alleles show synthetic lethality with cdc40/prp17 and are defective in 5' splice site cleavage                                                                                                             |
| YOR159C        | [SME1] Core Sm protein Sm E; part of heteroheptameric complex (with Smb1p, Smd1p, Smd2p, Smd3p, Smx3p, and Smx2p) that is part of the spliceosomal U1, U2, U4, and U5 snRNPs; homolog of human Sm E human E core protein homolog                                                                                                                                                                                                                                                                         |
| <b>YLL036C</b> | [PRP19] Splicing factor associated with the spliceosome; contains a U-box, a motif found in a class of ubiquitin ligases RNA splicing factor Null mutant is inviable; pso4-1 mutants are sensitive to 8-methoxypsoralen, UV, MMS, and X-rays. prp19 ntc20 double mutants are inviable; prp19 isy1 double mutants are inviable.                                                                                                                                                                           |
| YER172C        | [BRR2] RNA-dependent ATPase RNA helicase involved in the facilitation and disruption of snRNA interactions, required for disruption of U4/U6 base-pairing in native snRNPs to activate the spliceosome for catalysis DEIH-box ATPase Null mutant is inviable; stabilized splicing intermediates which contain a mutant hammerhead cis-targeted ribozyme, decreased steady-state levels of endogenous mRNAs, increased ratio of pre-mRNA to mRNA of specific message(s); synthetic lethal with U2 mutants |
| YHR165C        | [PRP8] Component of the U4/U6-U5 snRNP complex, involved in the second catalytic step of splicing U5 snRNP and spliceosome component Null mutant is inviable; synthetic lethal with U2 snRNA (LSR1); blocks pre-mRNA splicing in vivo and in vitro                                                                                                                                                                                                                                                       |
| YPR182W        | [SMX3] Core Sm protein Sm F; part of heteroheptameric complex (with Smb1p, Smd1p, Smd2p, Smd3p, Sme1p, and Smx2p) that is part of the spliceosomal U1, U2, U4, and U5 snRNPs; homolog of human Sm F snRNP protein                                                                                                                                                                                                                                                                                        |
| YKL173W        | [SNU114] GTPase component of U5 snRNP involved in mRNA splicing via spliceosome; binds directly to U5 snRNA; proposed to be involved in conformational changes of the spliceosome; similarity to ribosomal translocation factor EF-2 U5 snRNP-specific protein related to EF-2 Null mutant is inviable; growth inhibitory when over-expressed; required for pre-mRNA splicing in vivo                                                                                                                    |
| YPL213W        | [LEA1] Component of U2 snRNP; disruption causes reduced U2 snRNP levels; physically interacts with Msl1p; involved in telomere maintenance; putative homolog of human U2A' snRNP protein Null mutant is viable but grows slowly and is temperature sensitive. Null mutant also exhibits defects in spliceosome formation.                                                                                                                                                                                |
| YER029C        | [SMB1] Core Sm protein Sm B; part of heteroheptameric complex (with Smd1p, Smd2p, Smd3p, Sme1p, Smx3p, and Smx2p) that is part of the spliceosomal U1, U2, U4, and U5 snRNPs; homolog of human Sm B and Sm B'                                                                                                                                                                                                                                                                                            |
| YLR147C        | [SMD3] Core Sm protein Sm D3; part of heteroheptameric complex (with Smb1p, Smd1p, Smd2p, Sme1p, Smx3p, and Smx2p) that is part of the spliceosomal U1, U2, U4, and U5 snRNPs; homolog of human Sm D3 core snRNP protein Null mutant is inviable; depletion of Smd3p affects levels of U snRNAs and their cap modification; synthetic lethal with U2 snRNA (LSR1); blocks pre-mRNA splicing in vivo and in vitro                                                                                         |
| YGR074W        | [SMD1] Core Sm protein Sm D1; part of heteroheptameric complex (with Smb1p, Smd2p, Smd3p, Sme1p, Smx3p, and Smx2p) that is part of the spliceosomal U1, U2, U4, and U5 snRNPs; homolog of human Sm D1                                                                                                                                                                                                                                                                                                    |
| YFL017W-A      | [SMX2] Core Sm protein Sm G; part of heteroheptameric complex (with Smb1p, Smd1p, Smd2p, Smd3p, Sme1p, and Smx3p) that is part of the spliceosomal U1, U2, U4, and U5 snRNPs; homolog of human Sm G snRNP G protein (human Sm-G homolog)                                                                                                                                                                                                                                                                 |
| YLR275W        | [SMD2] Core Sm protein Sm D2; part of heteroheptameric complex (with Smb1p, Smd1p, Smd3p, Sme1p, Smx3p, and Smx2p) that is part of the spliceosomal U1, U2, U4, and U5 snRNPs; homolog of human Sm D2                                                                                                                                                                                                                                                                                                    |

|                |                                                                                                                                                                                                                                                                                                                                                                                                                                                                                                                                                                                                                                                                                                                                                                                    |
|----------------|------------------------------------------------------------------------------------------------------------------------------------------------------------------------------------------------------------------------------------------------------------------------------------------------------------------------------------------------------------------------------------------------------------------------------------------------------------------------------------------------------------------------------------------------------------------------------------------------------------------------------------------------------------------------------------------------------------------------------------------------------------------------------------|
| 0589           | GO_TERM:[transferase activity] P-Value:9.6e-02 OVERLAP:[GCR complex] <510.190.90> SIZE:2                                                                                                                                                                                                                                                                                                                                                                                                                                                                                                                                                                                                                                                                                           |
| <b>YNL199C</b> | [GCR2] Transcriptional activator of genes involved in glycolysis; interacts and functions with the DNA-binding protein Ger1p transcription factor Null mutant is viable and has partial growth defect on glucose-containing media                                                                                                                                                                                                                                                                                                                                                                                                                                                                                                                                                  |
| YPR048W        | [TAH18] Protein with a potential role in DNA replication; displays synthetic lethal genetic interaction with the pol3-13 allele of POL3, which encodes DNA polymerase delta tah18-1 mutant is hypersensitive to hydroxyurea, camptothecin when overexpressing wild-type TOP1, and has a slow growth phenotype                                                                                                                                                                                                                                                                                                                                                                                                                                                                      |
| YDL028C        | [MPS1] Dual-specificity kinase required for spindle pole body (SPB) duplication and spindle checkpoint function; substrates include SPB proteins Spc42p, Spc110p, and Spc98p, mitotic exit network protein Mob1p, and checkpoint protein Mad1p Null mutant is inviable. Eliminating the expression of MPS1 causes accumulation of non-viable cells with less than a 1 N DNA content. Allele-specific suppression and synthetic lethal interactions occur between mps1 and cdc37. Overexpression of Mps1p induces modification of Mad1p and arrests wild-type yeast cells in mitosis with morphologically normal spindles. mps1 does not arrest in the absence of spindle pole body duplication and monopolar spindle formation, or nocodazole treatment. Required for sporulation. |
| YHR209W        |                                                                                                                                                                                                                                                                                                                                                                                                                                                                                                                                                                                                                                                                                                                                                                                    |
| 0590           | GO_TERM:[ubiquinol-cytochrome-c reductase activity] P-Value:3.5e-04 OVERLAP:[Cytochrome bc1 complex (Ubiquinol-cytochrome c reductase complex, complex III)] <420.30> SIZE:10                                                                                                                                                                                                                                                                                                                                                                                                                                                                                                                                                                                                      |
| YGR032W        | [GSC2] Catalytic subunit of 1,3-beta-glucan synthase, has similarity to an alternate catalytic subunit, Fks1p (Gsc1p); Rho1p encodes the regulatory subunit; involved in cell wall synthesis and maintenance 1,3-beta-D-glucan synthase Null mutant is viable and shows partially reduced 1,3-beta-glucan synthase activity                                                                                                                                                                                                                                                                                                                                                                                                                                                        |
| YBR018C        | [GAL7] Galactose-1-phosphate uridyl transferase, synthesizes glucose-1-phosphate and UDP-galactose from UDP-D-glucose and alpha-D-galactose-1-phosphate in the second step of galactose catabolism galactose-1-phosphate uridyl transferase Null mutant is viable and cannot utilize galactose.                                                                                                                                                                                                                                                                                                                                                                                                                                                                                    |
| YPR054W        | [SMK1] Middle sporulation-specific mitogen-activated protein kinase (MAPK) required for spore morphogenesis MAP kinase smk1 asci are defective in organizing spore wall assembly and display enhanced sensitivity to enzymatic digestion, heat shock, and ether                                                                                                                                                                                                                                                                                                                                                                                                                                                                                                                    |
| YDR534C        | [FIT1] Mannoprotein that is incorporated into the cell wall via a glycosylphosphatidylinositol (GPI) anchor, involved in the retention of siderophore-iron in the cell wall Cell wall protein involved in iron uptake Impaired siderophore-iron uptake, activation of the major iron-dependent transcription factor AFT1.                                                                                                                                                                                                                                                                                                                                                                                                                                                          |
| YMR036C        | [MIH1] Protein tyrosine phosphatase involved in cell cycle control; regulates the phosphorylation state of Cdc28p; homolog of S. pombe cdc25 protein phosphatase Null mutant is viable <br> Short G2 delay                                                                                                                                                                                                                                                                                                                                                                                                                                                                                                                                                                         |
| <b>YBL045C</b> | [COR1] Core subunit of the ubiquinol-cytochrome c reductase complex (bc1 complex), which is a component of the mitochondrial inner membrane electron transport chain coenzyme QH2 cytochrome c reductase 44 kDa core protein subunit deficiency in cytochrome b; slow growth on glycerol                                                                                                                                                                                                                                                                                                                                                                                                                                                                                           |
| <b>YPR191W</b> | [QCR2] Subunit 2 of the ubiquinol cytochrome-c reductase complex, which is a component of the mitochondrial inner membrane electron transport chain; transcription is regulated by Hap1p, Hap2p/Hap3p, and heme 40 kDa ubiquinol cytochrome-c reductase core protein 2 Null mutant is viable and grows slowly on glycerol                                                                                                                                                                                                                                                                                                                                                                                                                                                          |
| 0591           | GO_TERM:[molecular_function] P-Value:5.5e-01 OVERLAP:[cytoplasmic ribosomal large subunit] <500.40.10> SIZE:81                                                                                                                                                                                                                                                                                                                                                                                                                                                                                                                                                                                                                                                                     |
| YJR108W        | [ABM1] Protein of unknown function, required for normal microtubule organization                                                                                                                                                                                                                                                                                                                                                                                                                                                                                                                                                                                                                                                                                                   |
| YDR399W        | [HPT1] Dimeric hypoxanthine-guanine phosphoribosyltransferase, catalyzes the formation of both inosine monophosphate and guanosine monophosphate; mutations in the human homolog HPRT1 can cause Lesch-Nyhan syndrome and Kelley-Seegmiller syndrome hypoxanthine guanine phosphoribosyltransferase                                                                                                                                                                                                                                                                                                                                                                                                                                                                                |
| YLR287C        |                                                                                                                                                                                                                                                                                                                                                                                                                                                                                                                                                                                                                                                                                                                                                                                    |
| RPP1B          |                                                                                                                                                                                                                                                                                                                                                                                                                                                                                                                                                                                                                                                                                                                                                                                    |
| <b>YDL130W</b> | [RPP1B] Ribosomal protein P1 beta, component of the ribosomal stalk, which is involved in interaction of translational elongation factors with ribosome; accumulation is regulated by phosphorylation and interaction with the P2 stalk component ribosomal protein P1B (L44') (YP1beta) (Ax)                                                                                                                                                                                                                                                                                                                                                                                                                                                                                      |
| 0592           | GO_TERM:[biological_process] P-Value:3.9e-01 OVERLAP:[Kinesin-related motorproteins] <140.30.30.10> SIZE:8                                                                                                                                                                                                                                                                                                                                                                                                                                                                                                                                                                                                                                                                         |
| <b>YBL063W</b> | [KIP1] Kinesin-related motor protein required for mitotic spindle assembly and chromosome segregation; functionally redundant with Cin8p kinesin related protein Null mutant is viable; kip1 cin8 double deletion mutants are inviable                                                                                                                                                                                                                                                                                                                                                                                                                                                                                                                                             |
| YMR016C        | [SOK2] Nuclear protein that plays a regulatory role in the cyclic AMP (cAMP)-dependent protein kinase (PKA) signal transduction pathway; negatively regulates pseudohyphal differentiation; homologous to several transcription factors transcription factor (putative)                                                                                                                                                                                                                                                                                                                                                                                                                                                                                                            |
| YHL008C        |                                                                                                                                                                                                                                                                                                                                                                                                                                                                                                                                                                                                                                                                                                                                                                                    |
| YHR097C        |                                                                                                                                                                                                                                                                                                                                                                                                                                                                                                                                                                                                                                                                                                                                                                                    |
| YDR248C        |                                                                                                                                                                                                                                                                                                                                                                                                                                                                                                                                                                                                                                                                                                                                                                                    |

|                |                                                                                                                                                                                                                                                                                                                                                                                                                                                    |
|----------------|----------------------------------------------------------------------------------------------------------------------------------------------------------------------------------------------------------------------------------------------------------------------------------------------------------------------------------------------------------------------------------------------------------------------------------------------------|
| YDR304C        | [CPR5] Peptidyl-prolyl cis-trans isomerase (cyclophilin) of the endoplasmic reticulum, catalyzes the cis-trans isomerization of peptide bonds N-terminal to proline residues; transcriptionally induced in response to unfolded proteins in the ER cyclophilin D peptidyl-prolyl cis-trans isomerase (PPIase)                                                                                                                                      |
| 0593           | GO_TERM:[catalytic activity] P-Value:7.3e-02                                                                                                                                                                                                                                                                                                                                                                                                       |
| YML078W        | [CPR3] Mitochondrial peptidyl-prolyl cis-trans isomerase (cyclophilin), catalyzes the cis-trans isomerization of peptide bonds N-terminal to proline residues; involved in protein refolding after import into mitochondria cyclophilin peptidyl-prolyl cis-trans isomerase (PPIase) Null mutant is viable, unable to grow on L-lactate at 37 degrees C                                                                                            |
| YPR184W        | [GDB1] Glycogen debranching enzyme containing glucanotranferase and alpha-1,6-amyloglucosidase activities, required for glycogen degradation Null mutant is viable but unable to degrade glycogen.                                                                                                                                                                                                                                                 |
| 0594           | GO_TERM:[unfolded protein binding] P-Value:5.7e-04                                                                                                                                                                                                                                                                                                                                                                                                 |
| YFL016C        | [MDJ1] Protein involved in folding of mitochondrially synthesized proteins in the mitochondrial matrix; localizes to the mitochondrial inner membrane; member of the DnaJ family of molecular chaperones DnaJ homolog involved in mitochondrial biogenesis and protein folding Null mutant is viable, displays a petite phenotype, loss of mitochondrial DNA, and inviability at 37 degrees C                                                      |
| YJR062C        | [NTA1] Amidase, removes the amide group from N-terminal asparagine and glutamine residues to generate proteins with N-terminal aspartate and glutamate residues that are targets of ubiquitin-mediated degradation 52 kDa amidase specific for N-terminal asparagine and glutamine Null mutant is viable but cannot degrade N-end rule substrates that have N-terminal asparagine or glutamine                                                     |
| YOR232W        | [MGE1] Protein of the mitochondrial matrix involved in protein import into mitochondria; acts as a cochaperone and a nucleotide release factor for Ssc1p; homolog of E. coli GrpE GrpE homolog                                                                                                                                                                                                                                                     |
| 0595           | GO_TERM:[biological_process] P-Value:3.5e-02 OVERLAP:[Ku complex] <510.180.30.10> SIZE:2                                                                                                                                                                                                                                                                                                                                                           |
| YHR033W        |                                                                                                                                                                                                                                                                                                                                                                                                                                                    |
| YKR051W        |                                                                                                                                                                                                                                                                                                                                                                                                                                                    |
| YML020W        |                                                                                                                                                                                                                                                                                                                                                                                                                                                    |
| YLR271W        |                                                                                                                                                                                                                                                                                                                                                                                                                                                    |
| <b>YMR106C</b> | [YKU80] Subunit of the telomeric Ku complex (Yku70p-Yku80p), involved in telomere length maintenance, structure and telomere position effect; relocates to sites of double-strand cleavage to promote nonhomologous end joining during DSB repair Ku80 homolog Null mutant is viable, methylmethane sulfonate sensitive, exhibits DNA joining defects; temperature sensitive, bleomycin sensitive                                                  |
| 0596           | GO_TERM:[glycolysis] P-Value:4.9e-06                                                                                                                                                                                                                                                                                                                                                                                                               |
| YKL060C        | [FBA1] Fructose 1,6-bisphosphate aldolase, a cytosolic enzyme required for glycolysis and gluconeogenesis; catalyzes the conversion of fructose 1,6 bisphosphate into two 3-carbon products: glyceraldehyde-3-phosphate and dihydroxyacetone phosphate aldolase Null mutant is viable, lacks aldolase enzymatic activity and fails to grow in media containing as a carbon source metabolites of only one side of the aldolase reaction            |
| YHR174W        | [ENO2] Enolase II, a phosphopyruvate hydratase that catalyzes the conversion of 2-phosphoglycerate to phosphoenolpyruvate during glycolysis and the reverse reaction during gluconeogenesis; expression is induced in response to glucose enolase                                                                                                                                                                                                  |
| YDR050C        | [TPI1] Triose phosphate isomerase, abundant glycolytic enzyme; mRNA half-life is regulated by iron availability; transcription is controlled by activators Reb1p, Gcr1p, and Rap1p through binding sites in the 5' non-coding region triosephosphate isomerase                                                                                                                                                                                     |
| YDR161W        |                                                                                                                                                                                                                                                                                                                                                                                                                                                    |
| 0597           | GO_TERM:[RNA editase activity] P-Value:9.3e-07                                                                                                                                                                                                                                                                                                                                                                                                     |
| YJL035C        | [TAD2] Subunit of tRNA-specific adenosine-34 deaminase, forms a heterodimer with Tad3p that converts adenosine to inosine at the wobble position of several tRNAs tRNA-specific adenosine deaminase subunit                                                                                                                                                                                                                                        |
| YLR316C        | [TAD3] Subunit of tRNA-specific adenosine-34 deaminase, forms a heterodimer with Tad2p that converts adenosine to inosine at the wobble position of several tRNAs tRNA-specific adenosine deaminase subunit                                                                                                                                                                                                                                        |
| 0598           | GO_TERM:[catalytic activity] P-Value:7.3e-02                                                                                                                                                                                                                                                                                                                                                                                                       |
| YOR386W        | [PHR1] DNA photolyase involved in photoreactivation, repairs pyrimidine dimers in the presence of visible light; induced by DNA damage; regulated by transcriptional repressor Rph1p photolyase photoreactivation repair deficient                                                                                                                                                                                                                 |
| YPL104W        | [MSD1] Mitochondrial aspartyl-tRNA synthetase, required for acylation of aspartyl-tRNA; yeast and bacterial aspartyl-, asparaginyl-, and lysyl-tRNA synthetases contain regions with high sequence similarity, suggesting a common ancestral gene aspartyl-tRNA synthetase Null mutant is viable but shows pleiotropic phenotypes consistent with a lesion in mitochondrial protein synthesis and is unable to acylate mitochondrial aspartyl-tRNA |
| 0599           | GO_TERM:[DNA bending activity] P-Value:1.1e-04                                                                                                                                                                                                                                                                                                                                                                                                     |
| YER043C        | [SAH1] S-adenosyl-L-homocysteine hydrolase, catabolizes S-adenosyl-L-homocysteine which is formed after donation of the activated methyl group of S-adenosyl-L-methionine (AdoMet) to an acceptor S-adenosyl-L-homocysteine hydrolase (putative)                                                                                                                                                                                                   |

|                |                                                                                                                                                                                                                                                                                                                                                                                                                                                                                                     |
|----------------|-----------------------------------------------------------------------------------------------------------------------------------------------------------------------------------------------------------------------------------------------------------------------------------------------------------------------------------------------------------------------------------------------------------------------------------------------------------------------------------------------------|
| YKL161C        |                                                                                                                                                                                                                                                                                                                                                                                                                                                                                                     |
| YBR182C        | [SMP1] Putative transcription factor involved in regulating the response to osmotic stress; member of the MADS-box family of transcription factors Null mutant is viable; overexpression of DNA-binding domain of SMP1 causes an 'osmoremedial' phenotype                                                                                                                                                                                                                                           |
| YPL089C        | [RLM1] MADS-box transcription factor, component of the protein kinase C-mediated MAP kinase pathway involved in the maintenance of cell integrity; phosphorylated and activated by the MAP-kinase Slt2p Null mutant is viable but shows caffeine sensitivity                                                                                                                                                                                                                                        |
| 0600           | GO_TERM:[Golgi vesicle transport] P-Value:1.5e-03                                                                                                                                                                                                                                                                                                                                                                                                                                                   |
| YMR192W        | [GYL1] Putative GTPase activating protein (GAP) that may have a role in polarized exocytosis; stimulates Gyp5p GAP activity on Ypt1p, colocalizes with Gyp5p at sites of polarized growth; interacts with Gyp5p, Rvs161p, and Rvs167p                                                                                                                                                                                                                                                               |
| YPL249C        | [GYP5] GTPase-activating protein (GAP) for yeast Rab family members, involved in ER to Golgi trafficking; exhibits GAP activity toward Ypt1p that is stimulated by Gyl1p, also acts on Sec4p; interacts with Gyl1p, Rvs161p and Rvs167p GTPase-activating protein                                                                                                                                                                                                                                   |
| YIL173W        | [VTH1] Putative membrane glycoprotein with strong similarity to Vth2p and Pep1p/Vps10p, may be involved in vacuolar protein sorting potential membrane glycoprotein (putative)strong similarity to Vth2 and Pep1/Vps10 Null mutant is viable; overexpression partially suppresses the sorting defect of a pep1 null mutant.                                                                                                                                                                         |
| YBR281C        |                                                                                                                                                                                                                                                                                                                                                                                                                                                                                                     |
| YNL191W        |                                                                                                                                                                                                                                                                                                                                                                                                                                                                                                     |
| 0601           | GO_TERM:[cellular metabolism] P-Value:9.7e-01                                                                                                                                                                                                                                                                                                                                                                                                                                                       |
| YGR144W        | [THI4] Protein required for thiamine biosynthesis and for mitochondrial genome stability biosynthetic pathway component producing the thiazole precursor of thiamine Null mutant is viable, auxotrophic for thiamine                                                                                                                                                                                                                                                                                |
| YMR021C        | [MAC1] Copper-sensing transcription factor involved in regulation of genes required for high affinity copper transport metal-binding transcriptional activator Null mutant is viable, has a defect in the plasma membrane Cu(II) and Fe(III) reductase activity, is slow growing, respiratory deficient, and hypersensitive to heat and exposure to cadmium, zinc, lead and H2O2                                                                                                                    |
| 0602           | GO_TERM:[catalytic activity] P-Value:7.3e-02                                                                                                                                                                                                                                                                                                                                                                                                                                                        |
| YIL113W        | [SDP1] Stress-inducible dual-specificity MAP kinase phosphatase, negatively regulates Slt2p MAP kinase by direct dephosphorylation, diffuse localization under normal conditions shifts to punctate localization after heat shock                                                                                                                                                                                                                                                                   |
| YLL019C        | [KNS1] Nonessential putative protein kinase of unknown cellular role; member of the LAMMER family of protein kinases, which are serine/threonine kinases also capable of phosphorylating tyrosine residues protein kinase homolog                                                                                                                                                                                                                                                                   |
| 0603           | GO_TERM:[actin cortical patch] P-Value:6.7e-05 OVERLAP:[Actin-associated proteins] <140.20.20> SIZE:25                                                                                                                                                                                                                                                                                                                                                                                              |
| YGR233C        | [PHO81] Cyclin-dependent kinase (CDK) inhibitor, regulates Pho80p-Pho85p and Pcl7p-Pho85p cyclin-CDK complexes in response to phosphate levels; required for derepression of PHO5; transcriptionally regulated by Pho4p and Pho2p phosphatase deficient                                                                                                                                                                                                                                             |
| YHR071W        | [PCL5] Cyclin, interacts with Pho85p cyclin-dependent kinase (Cdk), induced by Gcn4p at level of transcription, specifically required for Gcn4p degradation, may be sensor of cellular protein biosynthetic capacity                                                                                                                                                                                                                                                                                |
| YJL005W        | [CYR1] Adenylate cyclase, required for cAMP production and cAMP-dependent protein kinase signaling; involved in cell cycle control and glucose and nitrogen repression of sporulation adenylate cyclase Null mutant is inviable. cyr1 transiently arrests in G1 and sporulates precociously. N-terminal domain is dispensable for mitotic G1 arrest after nitrogen starvation, but required for sporulation. When altered, cAMP levels remain high and cells continue to bud with abnormal spindles |
| <b>YLL050C</b> | [COF1] Cofilin, promotes actin filament depolarization in a pH-dependent manner; binds both actin monomers and filaments and severs filaments, thought to be regulated by phosphorylation at SER4, ubiquitous and essential in eukaryotes actin binding and severing protein cofilin                                                                                                                                                                                                                |
| <b>YMR092C</b> | [AIP1] Actin cortical patch component, interacts with the actin depolymerizing factor cofilin; required to restrict cofilin localization to cortical patches; contains WD repeats actin cortical patch component                                                                                                                                                                                                                                                                                    |
| <b>YNL138W</b> | [SRV2] CAP (cyclase-associated protein) subunit of adenylyl cyclase complex; N-terminus binds adenylyl cyclase and facilitates activation by RAS; C-terminus binds ADP-actin monomers, facilitating regulation of actin dynamics and cell morphogenesis 70 kDa adenylyl cyclase-associated protein                                                                                                                                                                                                  |
| 0604           | GO_TERM:[catalytic activity] P-Value:1.8e-01 OVERLAP:[Phenylalanine-tRNA-ligase] <330> SIZE:3                                                                                                                                                                                                                                                                                                                                                                                                       |
| YOR252W        | [TMA16] Protein of unknown function that associates with ribosomes                                                                                                                                                                                                                                                                                                                                                                                                                                  |
| YNL024C        |                                                                                                                                                                                                                                                                                                                                                                                                                                                                                                     |
| <b>YPR047W</b> | [MSF1] Mitochondrial phenylalanyl-tRNA synthetase alpha subunit, active as a monomer, unlike the cytoplasmic subunit which is active as a dimer complexed to a beta subunit dimer; similar to the alpha subunit of E. coli phenylalanyl-tRNA synthetase phenylalanyl-tRNA synthetase alpha subunit                                                                                                                                                                                                  |
| 0605           | GO_TERM:[actin cortical patch] P-Value:1.2e-05 OVERLAP:[Actin-associated proteins] <140.20.20> SIZE:25                                                                                                                                                                                                                                                                                                                                                                                              |

|                |                                                                                                                                                                                                                                                                                                                                                                                                                            |
|----------------|----------------------------------------------------------------------------------------------------------------------------------------------------------------------------------------------------------------------------------------------------------------------------------------------------------------------------------------------------------------------------------------------------------------------------|
| YOL101C        | [IZH4] Membrane protein involved in zinc metabolism, member of the four-protein IZH family, expression induced by fatty acids and altered zinc levels; deletion reduces sensitivity to excess zinc; possible role in sterol metabolism                                                                                                                                                                                     |
| YGR241C        | [YAP1802] Protein involved in clathrin cage assembly; binds Pan1p and clathrin; homologous to Yap1801p, member of the AP180 protein family                                                                                                                                                                                                                                                                                 |
| <b>YIR006C</b> | [PAN1] Part of actin cytoskeleton-regulatory complex Pan1p-Sla1p-End3p, associates with actin patches on the cell cortex; promotes protein-protein interactions essential for endocytosis; previously thought to be a subunit of poly(A) ribonuclease Null mutant is inviable; conditional mutants show arrest of translation initiation, alterations in mRNA poly(A) tail lengths, and altered cellular location of Mod5p |
| YNL084C        | [END3] EH domain-containing protein involved in endocytosis, actin cytoskeletal organization and cell wall morphogenesis; forms a complex with Sla1p and Pan1p Null mutant is viable and defective in endocytosis                                                                                                                                                                                                          |
| 0606           | GO_TERM:[molecular_function] P-Value:1.7e-01                                                                                                                                                                                                                                                                                                                                                                               |
| YHL046C        | [YHL046C] Putative protein of unknown function; not an essential gene                                                                                                                                                                                                                                                                                                                                                      |
| YOR355W        | [GDS1] Protein of unknown function, required for growth on glycerol as a carbon source Null mutant is viable, shows partial impairment of growth on medium containing glycerol as the carbon source. Overexpression suppresses NAM9-1 glycerol deficient phenotype                                                                                                                                                         |
| 0607           | GO_TERM:[transcription regulator activity] P-Value:1.2e-01                                                                                                                                                                                                                                                                                                                                                                 |
| YDR475C        | [JIP4] Protein of unknown function; previously annotated as two separate ORFs, YDR474C and YDR475C, which were merged as a result of corrections to the systematic reference sequence                                                                                                                                                                                                                                      |
| YOR289W        |                                                                                                                                                                                                                                                                                                                                                                                                                            |
| YIL045W        | [PIG2] Putative type-1 protein phosphatase targeting subunit that tethers Glc7p type-1 protein phosphatase to Gsy2p glycogen synthase type-1 protein phosphatase regulatory subunit                                                                                                                                                                                                                                        |
| YPR169W        | [JIP5] Nucleolar protein of unknown function, exhibits a physical interaction with Bre1p                                                                                                                                                                                                                                                                                                                                   |
| YIR033W        | [MGA2] ER membrane protein involved, with its homolog Spt23p, in regulation of OLE1 transcription; inactive ER form dimerizes and one subunit is then activated by ubiquitin/proteasome-dependent processing followed by nuclear targeting Null mutant is viable, shows subtle effects on growth, UV sensitivity, and galactose utilization; mga2 spt23 double deletion mutants are inviable                               |
| YER033C        | [ZRG8] Cytoplasmic protein of unknown function, transcription is induced under conditions of zinc deficiency                                                                                                                                                                                                                                                                                                               |
| YMR219W        | [ESC1] Protein localized to the nuclear periphery, involved in telomeric silencing; interacts with PAD4-domain of Sir4p                                                                                                                                                                                                                                                                                                    |
| YDR096W        | [GIS1] Transcriptional factor, involved in the expression of genes during nutrient limitation; also involved in the negative regulation of DPPI1 and PHR1 zinc finger protein (putative) Null mutant is viable and shows enhanced basal level expression of PHR1                                                                                                                                                           |
| YFL023W        | [BUD27] Protein involved in bud-site selection, nutrient signaling, and gene expression controlled by the TOR kinase; diploid mutants display a random budding pattern instead of the wild-type bipolar pattern                                                                                                                                                                                                            |
| 0608           | OVERLAP:[1,6-beta-D-glucan synthase] <190.20> SIZE:2                                                                                                                                                                                                                                                                                                                                                                       |
| YFR042W        |                                                                                                                                                                                                                                                                                                                                                                                                                            |
| <b>YPR159W</b> | [KRE6] Protein required for beta-1,6 glucan biosynthesis; putative beta-glucan synthase; appears functionally redundant with Skn1p beta-glucan synthase (putative) Null mutant is viable, slow growing, killer toxin-resistant, possesses half the normal level of wild-type cell wall (1->6) beta-glucan)                                                                                                                 |
| 0609           | GO_TERM:[transcription regulator activity] P-Value:2.1e-03                                                                                                                                                                                                                                                                                                                                                                 |
| YDR223W        | [CRF1] Transcriptional corepressor involved in the regulation of ribosomal protein gene transcription via the TOR signaling pathway and protein kinase A, phosphorylated by activated Yak1p which promotes accumulation of Crf1p in the nucleus                                                                                                                                                                            |
| YPR104C        | [FHL1] Putative transcriptional regulator with similarity to DNA-binding domain of Drosophila forkhead; required for rRNA processing domain similar to the fork head DNA-binding domain found in the developmental fork head protein of Drosophila melanogaster and in the HNF-3 family of hepatocyte mammalian transcription factors.forkhead protein Null mutant shows reduced growth rate and lower rRNA content        |
| 0610           | GO_TERM:[actin cytoskeleton organization and biogenesis] P-Value:2.4e-03                                                                                                                                                                                                                                                                                                                                                   |
| YCL034W        | [LSB5] Protein of unknown function; binds Las17p, which is a homolog of human Wiskott-Aldrich Syndrome protein involved in actin patch assembly and actin polymerization                                                                                                                                                                                                                                                   |
| YOR094W        | [ARF3] Glucose-repressible ADP-ribosylation factor, GTPase of the Ras superfamily involved in development of polarity GTP-binding ADP-ribosylation factor                                                                                                                                                                                                                                                                  |
| 0611           | GO_TERM:[nucleobase, nucleoside, nucleotide and nucleic acid metabolism] P-Value:3.0e-01 OVERLAP:[rRNA splicing] <440.30.20> SIZE:24                                                                                                                                                                                                                                                                                       |
| <b>YLR223C</b> | [IFH1] Essential protein with a highly acidic N-terminal domain; IFH1 exhibits genetic interactions with FHL1, overexpression interferes with silencing at telomeres and HM loci; potential Cdc28p substrate Null mutant is inviable, ifh1 fhl1 double deletion mutant is viable                                                                                                                                           |
| YOR247W        | [SRL1] Mannoprotein that exhibits a tight association with the cell wall, required for cell wall stability in the absence of GPI-anchored mannoproteins; has a high serine-threonine content; expression is induced in cell wall mutants                                                                                                                                                                                   |

|                |                                                                                                                                                                                                                                                                                                                                                                                                                                                                                                                                                                    |
|----------------|--------------------------------------------------------------------------------------------------------------------------------------------------------------------------------------------------------------------------------------------------------------------------------------------------------------------------------------------------------------------------------------------------------------------------------------------------------------------------------------------------------------------------------------------------------------------|
| 0612           | GO_TERM:[actin cytoskeleton] P-Value:1.8e-23 OVERLAP:[Arp2p/Arp3p complex] <260.90> SIZE:6                                                                                                                                                                                                                                                                                                                                                                                                                                                                         |
| YGL242C        |                                                                                                                                                                                                                                                                                                                                                                                                                                                                                                                                                                    |
| YIL156W        | [UBP7] Ubiquitin-specific protease that cleaves ubiquitin-protein fusions ubiquitin-specific protease                                                                                                                                                                                                                                                                                                                                                                                                                                                              |
| YJL020C        | [BBC1] Protein possibly involved in assembly of actin patches; interacts with an actin assembly factor Las17p and with the SH3 domains of Type I myosins Myo3p and Myo5p; localized predominantly to cortical actin patches                                                                                                                                                                                                                                                                                                                                        |
| YOR181W        | [LAS17] Actin assembly factor, activates the Arp2/3 protein complex that nucleates branched actin filaments; localizes with the Arp2/3 complex to actin patches; homolog of the human Wiskott-Aldrich syndrome protein (WASP) actin assembly factor Null mutant is viable, demonstrates impaired budding and cytokinesis and severely disrupted cortical actin; other mutants accumulate secretory vesicles in the bud                                                                                                                                             |
| YMR032W        | [HOF1] Bud neck-localized, SH3 domain-containing protein required for cytokinesis; regulates actomyosin ring dynamics and septin localization; interacts with the formins, Bni1p and Bnr1p, and with Cyk3p, Vrp1p, and Bni5p Null mutant is defective in cytokinesis                                                                                                                                                                                                                                                                                               |
| YKL129C        | [MYO3] One of two type I myosins; localizes to actin cortical patches; deletion of MYO3 has little effect on growth, but myo3 myo5 double deletion causes severe defects in growth and actin cytoskeleton organization myosin I Null mutant is viable, myo3 myo5 double deletion mutants exhibit severe defects in growth and actin cytoskeletal organization                                                                                                                                                                                                      |
| YLR337C        | [VRP1] Proline-rich actin-associated protein involved in cytoskeletal organization and cytokinesis; related to mammalian Wiskott-Aldrich syndrome protein (WASP)-interacting protein (WIP) proline-rich protein verprolin Null mutant is viable but is both temperature and pH sensitive and cannot grow on minimal medium. Null mutant also exhibits depolarization of the actin cytoskeleton.                                                                                                                                                                    |
| <b>YDL029W</b> | [ARP2] Essential component of the Arp2/3 complex, which is a highly conserved actin nucleation center required for the motility and integrity of actin patches; involved in endocytosis and membrane growth and polarity actin related protein cells with mutations in Arp2 and Arc15 are defective in mitochondrial movement.                                                                                                                                                                                                                                     |
| YMR109W        | [MYO5] One of two type I myosins; contains proline-rich tail homology 2 (TH2) and SH3 domains; MYO5 deletion has little effect on growth, but myo3 myo5 double deletion causes severe defects in growth and actin cytoskeleton organization myosin I Null mutant is viable; myo3 myo5 double deletion mutants exhibit loss of actin polarity, growth arrest at 37 degrees or high osmotic strength, accumulation of intracellular membranes, and loss of polarized cell surface growth; myo3 myo5 double mutants have longer doubling times and thicker cell walls |
| YBR234C        | [ARC40] Essential subunit of the ARP2/3 complex, which is required for the motility and integrity of cortical actin patches                                                                                                                                                                                                                                                                                                                                                                                                                                        |
| <b>YJR065C</b> | [ARP3] Essential component of the Arp2/3 complex, which is a highly conserved actin nucleation center required for the motility and integrity of actin patches; involved in endocytosis and membrane growth and polarity Mutations in Arp3 lead to defects in actin-patch motility and a rearrangement of the cortical actin cytoskeleton.                                                                                                                                                                                                                         |
| <b>YNR035C</b> | [ARC35] Subunit of the ARP2/3 complex, which is required for the motility and integrity of cortical actin patches; required for cortical localization of calmodulin Null mutant exhibits severe growth defects; synthetic lethal with vma2.                                                                                                                                                                                                                                                                                                                        |
| <b>YLR370C</b> | [ARC18] Subunit of the ARP2/3 complex, which is required for the motility and integrity of cortical actin patches                                                                                                                                                                                                                                                                                                                                                                                                                                                  |
| <b>YIL062C</b> | [ARC15] Subunit of the ARP2/3 complex, which is required for the motility and integrity of cortical actin patches Null mutant exhibits severe growth defects. Cells with mutations in Arp2 and Arc15 are defective in mitochondrial movement.                                                                                                                                                                                                                                                                                                                      |
| <b>YKL013C</b> | [ARC19] Subunit of the ARP2/3 complex, which is required for the motility and integrity of cortical actin patches Null mutant is viable, but exhibits severe growth defects                                                                                                                                                                                                                                                                                                                                                                                        |
| 0613           | GO_TERM:[catalytic activity] P-Value:7.3e-02                                                                                                                                                                                                                                                                                                                                                                                                                                                                                                                       |
| YDR523C        | [SPS1] Putative protein serine/threonine kinase expressed at the end of meiosis and localized to the prospore membrane, required for correct localization of enzymes involved in spore wall synthesis                                                                                                                                                                                                                                                                                                                                                              |
| YJR078W        | [BNA2] Tryptophan 2,3-dioxygenase, required for biosynthesis of nicotinic acid from tryptophan via kynurenine pathway Tryptophan 2,3-dioxygenase Null: Nicotinic acid auxotroph. Other phenotypes: Deletion of the gene is co-lethal with the deletion of NPT1                                                                                                                                                                                                                                                                                                     |
| 0614           | GO_TERM:[bud tip] P-Value:1.1e-02 OVERLAP:[Isocitrate dehydrogenase] <250> SIZE:2                                                                                                                                                                                                                                                                                                                                                                                                                                                                                  |
| YGR229C        | [SMI1] Protein involved in the regulation of cell wall synthesis; proposed to be involved in coordinating cell cycle progression with cell wall integrity 57 kDa nuclear protein Null mutant is viable, shows osmotic sensitivity, sensitivity to cercosporamide, resistance to zymolase; temperature sensitive mutant arrests at S phase with small buds                                                                                                                                                                                                          |
| YIL041W        | [GVP36] Golgi vesicle protein of unknown function; localizes to both early and late Golgi vesicles peripheral membrane protein Null: no notable phenotype                                                                                                                                                                                                                                                                                                                                                                                                          |
| YLR346C        |                                                                                                                                                                                                                                                                                                                                                                                                                                                                                                                                                                    |
| <b>YNL037C</b> | [IDH1] Subunit of mitochondrial NAD(+)-dependent isocitrate dehydrogenase, which catalyzes the oxidation of isocitrate to alpha-ketoglutarate in the TCA cycle isocitrate dehydrogenase 1 alpha-4-beta-4 subunit Null mutant is viable, grows at a reduced rate on glycerol, lactate, and acetate                                                                                                                                                                                                                                                                  |
| YHR030C        | [SLT2] Serine/threonine MAP kinase involved in regulating the maintenance of cell wall integrity and progression through the cell cycle; regulated by the PKC1-mediated signaling pathway Null mutant is viable but temperature sensitive. At elevated temperatures or in the presence of caffeine, null mutants exhibit cell wall defects that result in cell lysis. Lysis is prevented by addition of 1M sorbitol.                                                                                                                                               |
| YPL140C        | [MKK2] Mitogen-activated kinase kinase involved in protein kinase C signaling pathway that controls cell integrity; upon activation by Bck1p phosphorylates downstream target, Slt2p; functionally redundant with Mkk1p protein kinase Null mutant is viable and shows no obvious phenotypes; mkk1 mkk2 double mutant is caffeine-sensitive and shows a temperature-sensitive cell lysis defect remediated by osmotic stabilizers                                                                                                                                  |
| 0615           | GO_TERM:[biological_process] P-Value:9.6e-02                                                                                                                                                                                                                                                                                                                                                                                                                                                                                                                       |
| YJR072C        | [NPA3] Essential, conserved, cytoplasmic ATPase; phosphorylated by the Pcl1p-Pho85p kinase complex                                                                                                                                                                                                                                                                                                                                                                                                                                                                 |
| YOR262W        |                                                                                                                                                                                                                                                                                                                                                                                                                                                                                                                                                                    |

|                |                                                                                                                                                                                                                                                                                                                                                                                                                                                                                       |
|----------------|---------------------------------------------------------------------------------------------------------------------------------------------------------------------------------------------------------------------------------------------------------------------------------------------------------------------------------------------------------------------------------------------------------------------------------------------------------------------------------------|
| 0616           | GO_TERM:[biological_process] P-Value:9.3e-03                                                                                                                                                                                                                                                                                                                                                                                                                                          |
| YCR004C        | [YCP4] Protein of unknown function, has sequence and structural similarity to flavodoxins; green fluorescent protein (GFP)-fusion protein localizes to the cytoplasm in a punctate pattern                                                                                                                                                                                                                                                                                            |
| YLR253W        |                                                                                                                                                                                                                                                                                                                                                                                                                                                                                       |
| YBR052C        | [RFS1] Protein of unknown function; member of a flavodoxin-like fold protein family that includes Pst2p and Ycp4p; green fluorescent protein (GFP)-fusion protein localizes to the cytoplasm in a punctate pattern member of a flavodoxin-like fold protein family (including also Pst2 and Ycp4).                                                                                                                                                                                    |
| YDR032C        | [PST2] Protein of unknown function with similarity to members of a family of flavodoxin-like proteins; induced by oxidative stress in a Yap1p dependent manner; GFP-fusion protein localizes to the cytoplasm in a punctate pattern                                                                                                                                                                                                                                                   |
| 0617           | GO_TERM:[membrane fraction] P-Value:4.3e-03                                                                                                                                                                                                                                                                                                                                                                                                                                           |
| YCR007C        |                                                                                                                                                                                                                                                                                                                                                                                                                                                                                       |
| YDR072C        | [IPT1] Inositolphosphotransferase 1, involved in synthesis of mannose-(inositol-P) <sub>2</sub> -ceramide (M(IP) <sub>2</sub> C), which is the most abundant sphingolipid in cells, mutation confers resistance to the antifungals syringomycin E and DmAMP1 in some growth media inositolphosphotransferase 1 Null mutant is viable but cannot synthesize M(IP) <sub>2</sub> C, instead accumulates the precursor, mannose-inositol-P-ceramide, and is slightly resistant to calcium |
| YDR107C        |                                                                                                                                                                                                                                                                                                                                                                                                                                                                                       |
| YOL015W        | [YOL015W] Hypothetical protein; null mutant displays increased levels of spontaneous Rad52 foci                                                                                                                                                                                                                                                                                                                                                                                       |
| 0618           | GO_TERM:[intracellular protein transport] P-Value:1.8e-02                                                                                                                                                                                                                                                                                                                                                                                                                             |
| YER180C-A      | [SLO1] Protein interacting with Arl3p, which is a GTPase of the Ras superfamily involved in vesicle-tethering at the Golgi; putative ortholog of human SCOCO                                                                                                                                                                                                                                                                                                                          |
| YPL051W        | [ARL3] GTPase of the Ras superfamily required to recruit Arl1p to the Golgi; similar to ADP-ribosylation factor Null mutant is viable, displays cold-sensitive growth                                                                                                                                                                                                                                                                                                                 |
| 0619           | GO_TERM:[biological_process] P-Value:9.6e-02                                                                                                                                                                                                                                                                                                                                                                                                                                          |
| YMR259C        |                                                                                                                                                                                                                                                                                                                                                                                                                                                                                       |
| YOR042W        | [CUE5] Protein containing a CUE domain that binds ubiquitin, which may facilitate intramolecular monoubiquitination; green fluorescent protein (GFP)-fusion protein localizes to the cytoplasm in a punctate pattern                                                                                                                                                                                                                                                                  |
| 0620           | GO_TERM:[actin cytoskeleton organization and biogenesis] P-Value:8.7e-12 OVERLAP:[Actin-associated proteins] <140.20.20> SIZE:25                                                                                                                                                                                                                                                                                                                                                      |
| <b>YCR088W</b> | [ABP1] Actin-binding protein of the cortical actin cytoskeleton, important for activation of the Arp2/3 complex that plays a key role actin in cytoskeleton organization actin binding protein                                                                                                                                                                                                                                                                                        |
| YOR367W        | [SCP1] Component of yeast cortical actin cytoskeleton, binds and cross links actin filaments; originally identified by its homology to calponin (contains a calponin-like repeat) but the Scp1p domain structure is more similar to transgelin calponin homolog Null mutant is viable and shows no apparent phenotype                                                                                                                                                                 |
| YMR253C        |                                                                                                                                                                                                                                                                                                                                                                                                                                                                                       |
| YLR064W        |                                                                                                                                                                                                                                                                                                                                                                                                                                                                                       |
| YBR098W        | [MMS4] Subunit of the structure-specific Mms4p-Mus81p endonuclease that cleaves branched DNA; involved in recombination and DNA repair null is synthetically lethal with sgs1 null                                                                                                                                                                                                                                                                                                    |
| YJR083C        | [ACF4] Protein of unknown function, computational analysis of large-scale protein-protein interaction data suggests a possible role in actin cytoskeleton organization; potential Cdc28p substrate                                                                                                                                                                                                                                                                                    |
| YBR239C        |                                                                                                                                                                                                                                                                                                                                                                                                                                                                                       |
| YKR030W        | [GMH1] Golgi membrane protein of unknown function, interacts with Gea1p and Gea2p; required for localization of Gea2p; computational analysis suggests a possible role in either cell wall synthesis or protein-vacuolar targeting                                                                                                                                                                                                                                                    |
| YPL246C        | [RBD2] Possible rhomboid protease, has similarity to eukaryotic rhomboid proteases including Pep1p rhomboid protease                                                                                                                                                                                                                                                                                                                                                                  |
| YJL151C        | [SNA3] Integral membrane protein localized to vacuolar intraluminal vesicles, computational analysis of large-scale protein-protein interaction data suggests a possible role in either cell wall synthesis or protein-vacuolar targeting Null mutant is viable, excretes inositol                                                                                                                                                                                                    |
| YNL094W        | [APP1] Protein of unknown function, interacts with Rvs161p and Rvs167p; computational analysis of protein-protein interactions in large-scale studies suggests a possible role in actin filament organization Null: Viable. Other phenotypes: Unknown                                                                                                                                                                                                                                 |
| YOR284W        | [HUA2] Cytoplasmic protein of unknown function; computational analysis of large-scale protein-protein interaction data suggests a possible role in actin patch assembly                                                                                                                                                                                                                                                                                                               |
| <b>YNL243W</b> | [SLA2] Transmembrane actin-binding protein involved in membrane cytoskeleton assembly and cell polarization; adaptor protein that links actin to clathrin and endocytosis; present in the actin cortical patch of the emerging bud tip; dimer in vivo transmembrane protein Null mutant is viable and temperature sensitive                                                                                                                                                           |
| <b>YBL007C</b> | [SLA1] Cytoskeletal protein binding protein required for assembly of the cortical actin cytoskeleton; contains 3 SH3 domains; interacts with proteins regulating actin dynamics and with proteins required for endocytosis cytoskeletal protein binding protein Null mutant is viable, temperature sensitive. sla1 mutants are synthetically lethal in combination with anc1 and abp1 mutants                                                                                         |

|           |                                                                                                                                                                                                                                                                                                                                                                                                                                                                                                                                                                                                                                                      |
|-----------|------------------------------------------------------------------------------------------------------------------------------------------------------------------------------------------------------------------------------------------------------------------------------------------------------------------------------------------------------------------------------------------------------------------------------------------------------------------------------------------------------------------------------------------------------------------------------------------------------------------------------------------------------|
| YFR024C-A | [LSB3] Protein containing a C-terminal SH3 domain; binds Las17p, which is a homolog of human Wiskott-Aldrich Syndrome protein involved in actin patch assembly and actin polymerization                                                                                                                                                                                                                                                                                                                                                                                                                                                              |
| YHR016C   | [YSC84] Protein involved in the organization of the actin cytoskeleton; contains SH3 domain similar to Rvs167p                                                                                                                                                                                                                                                                                                                                                                                                                                                                                                                                       |
| <hr/>     |                                                                                                                                                                                                                                                                                                                                                                                                                                                                                                                                                                                                                                                      |
| 0621      |                                                                                                                                                                                                                                                                                                                                                                                                                                                                                                                                                                                                                                                      |
| YDR017C   | [KCS1] Inositol hexaphosphate kinase, phosphorylates inositol hexakisphosphate (InsP6) to diphosphoinositol polyphosphates, required for proper vacuole morphology and involved in salt stress response, contains two leucine heptad repeats Inositol polyphosphate kinase Null mutant is viable; kcs1 ptc1 double mutant is inviable; isolated as a suppressor of a hyper-recombination mutant of PKC1                                                                                                                                                                                                                                              |
| YMR196W   |                                                                                                                                                                                                                                                                                                                                                                                                                                                                                                                                                                                                                                                      |
| <hr/>     |                                                                                                                                                                                                                                                                                                                                                                                                                                                                                                                                                                                                                                                      |
| 0622      | GO_TERM:[signal transduction] P-Value:1.8e-03                                                                                                                                                                                                                                                                                                                                                                                                                                                                                                                                                                                                        |
| YDR373W   | [FRQ1] N-myristoylated calcium-binding protein that may have a role in intracellular signaling through its regulation of the phosphatidylinositol 4-kinase Pik1p; member of the recoverin/frequenin branch of the EF-hand superfamily                                                                                                                                                                                                                                                                                                                                                                                                                |
| YNL267W   | [PIK1] Phosphatidylinositol 4-kinase; catalyzes first step in the biosynthesis of phosphatidylinositol-4,5-bisphosphate; may control cytokinesis through the actin cytoskeleton phosphatidylinositol 4-kinase Null mutant is inviable; overexpression of PIK1 enhances response to mating pheromone; temperature-sensitive mutants can be suppressed by high osmolarity or an elevated concentration of Ca <sup>2+</sup> ; conditional mutants have a cytokinesis defect                                                                                                                                                                             |
| <hr/>     |                                                                                                                                                                                                                                                                                                                                                                                                                                                                                                                                                                                                                                                      |
| 0623      | GO_TERM:[energy reserve metabolism] P-Value:6.0e-07                                                                                                                                                                                                                                                                                                                                                                                                                                                                                                                                                                                                  |
| YBR001C   | [NTH2] Putative neutral trehalase, required for thermotolerance and may mediate resistance to other cellular stresses neutral trehalase Null mutant is viable but lacks thermotolerance                                                                                                                                                                                                                                                                                                                                                                                                                                                              |
| YDR001C   | [NTH1] Neutral trehalase, degrades trehalose; required for thermotolerance and may mediate resistance to other cellular stresses; may be phosphorylated by Cdc28p neutral trehalase                                                                                                                                                                                                                                                                                                                                                                                                                                                                  |
| YKR098C   | [UBP11] Ubiquitin-specific protease that cleaves ubiquitin from ubiquitinated proteins ubiquitin-specific protease                                                                                                                                                                                                                                                                                                                                                                                                                                                                                                                                   |
| YDR130C   | [FIN1] Spindle pole body-related intermediate filament protein, forms cell cycle-specific filaments between spindle pole bodies in mother and daughter cells, able to self-assemble, expression induced during S/G <sub>2</sub> , localization cell-cycle dependent                                                                                                                                                                                                                                                                                                                                                                                  |
| YDR099W   | [BMH1] 14-3-3 protein, minor isoform; binds proteins and DNA, involved in regulation of many processes including exocytosis and vesicle transport, Ras/MAPK signaling during pseudohyphal development, rapamycin-sensitive signaling, and others member of conserved eukaryotic 14-3-3 gene family Null mutant is viable; bmh1 bmh2 double mutant is inviable; (in strain Sigma-1278b, required for pseudohyphal development but not for viability)                                                                                                                                                                                                  |
| YER177W   | [BMH1] 14-3-3 protein, major isoform; binds proteins and DNA, involved in regulation of many processes including exocytosis and vesicle transport, Ras/MAPK signaling during pseudohyphal development, rapamycin-sensitive signaling, and others member of conserved eukaryotic 14-3-3 gene family Null mutant is viable; bmh1 bmh2 double mutant is inviable; (in strain Sigma-1278b, required for pseudohyphal development but not for viability)                                                                                                                                                                                                  |
| <hr/>     |                                                                                                                                                                                                                                                                                                                                                                                                                                                                                                                                                                                                                                                      |
| 0624      | GO_TERM:[phosphoric monoester hydrolase activity] P-Value:7.4e-04                                                                                                                                                                                                                                                                                                                                                                                                                                                                                                                                                                                    |
| YIL053W   | [RHR2] Constitutively expressed isoform of DL-glycerol-3-phosphatase; involved in glycerol biosynthesis, induced in response to both anaerobic and, along with the Hor2p/Gpp2p isoform, osmotic stress DL-glycerol-3-phosphatase Mutants lacking RHR2 show poor anaerobic growth. Mutants lacking RHR2 and HOR2 lack glycerol 3-phosphatase activity, produce only a small amount of glycerol. Overproduction of both genes does not significantly enhance glycerol production.                                                                                                                                                                      |
| YOR208W   | [PTP2] Phosphotyrosine-specific protein phosphatase involved in the inactivation of mitogen-activated protein kinase (MAPK) during osmolarity sensing; dephosphorylates Hog1p MAPK and regulates its localization; localized to the nucleus tyrosine phosphatase Null mutant is viable, grows slowly, is hypersensitive to heat; ptp2 ptc1 mutants exhibit synthetic lethality                                                                                                                                                                                                                                                                       |
| <hr/>     |                                                                                                                                                                                                                                                                                                                                                                                                                                                                                                                                                                                                                                                      |
| 0625      | GO_TERM:[RecQ helicase-Topo III complex] P-Value:1.9e-09                                                                                                                                                                                                                                                                                                                                                                                                                                                                                                                                                                                             |
| YGL017W   | [ATE1] Arginyl-tRNA-protein transferase, catalyzes post-translational conjugation of arginine to the amino termini of acceptor proteins which are then subject to degradation via the N-end rule pathway arginyl-tRNA-protein transferase Null mutant is viable, but unable to degrade substrates of the N-end rule pathway that start with residues recognized by the Arg-transferase                                                                                                                                                                                                                                                               |
| YLR187W   | [SKG3] Protein of unknown function; green fluorescent protein (GFP)-fusion protein localizes to the cell periphery, cytoplasm, bud, and bud neck; potential Cdc28p substrate; similar to Caf120p and Skg4p                                                                                                                                                                                                                                                                                                                                                                                                                                           |
| YMR190C   | [SGS1] Nucleolar DNA helicase of the RecQ family involved in maintenance of genome integrity, regulates chromosome synapsis and meiotic crossing over; has similarity to human BLM and WRN helicases implicated in Bloom and Werner syndromes Null mutant is viable; strains lacking SGS1 exhibit elevated levels of chromosome missegregation during both mitotic and meiotic division. sgs1 null strains suppress the slow growth of a top3 delta strain lacking topoisomerase III and show an increase in subtelomeric Y' instability due to hyperrecombination.                                                                                  |
| YLR234W   | [TOP3] DNA Topoisomerase III, conserved protein that functions in a complex with Sgs1p and Rmi1p to relax single-stranded negatively-supercoiled DNA preferentially, involved in telomere stability and regulation of mitotic recombination DNA topoisomerase III Null mutant exhibits a genomic instability phenotype that includes slow growth, hyper-sensitivity to genotoxic agents, mitotic hyper-recombination, increased chromosome missegregation, and meiotic failure. top3 is RAD1-dependent hyper-Rec in mitosis, suggesting that top3 damage is channeled to the recombination repair pathway by RAD1; TOP3 is required for sporulation. |
| YPL024W   | [RMI1] Involved in response to DNA damage; null mutants have increased rates of recombination and delayed S phase; interacts physically and genetically with Sgs1p (RecQ family member) and Top3p (topoisomerase III) Null mutant is viable and suppresses the failure of an ace2 null to activate CTS1; also grows slowly at 37 C                                                                                                                                                                                                                                                                                                                   |
| <hr/>     |                                                                                                                                                                                                                                                                                                                                                                                                                                                                                                                                                                                                                                                      |
| 0626      | GO_TERM:[mismatch repair] P-Value:5.2e-11 OVERLAP:[MSH2/MSH3 complex] <510.180.50.10> SIZE:3                                                                                                                                                                                                                                                                                                                                                                                                                                                                                                                                                         |

|           |                                                                                                                                                                                                                                                                                                                                                                                                                                                                                                                                                                                                                  |
|-----------|------------------------------------------------------------------------------------------------------------------------------------------------------------------------------------------------------------------------------------------------------------------------------------------------------------------------------------------------------------------------------------------------------------------------------------------------------------------------------------------------------------------------------------------------------------------------------------------------------------------|
| YOL043C   | [NTG2] DNA N-glycosylase and apurinic/aprimidinic (AP) lyase involved in base excision repair, localizes to the nucleus endonuclease III DNA base excision repair N-glycosylase                                                                                                                                                                                                                                                                                                                                                                                                                                  |
| YPL164C   | [MLH3] Protein involved in DNA mismatch repair; forms a complex with Mlh1p to promote meiotic crossing-over; mammalian homolog is implicated mammalian microsatellite instability Null mutant is viable. Null mutant exhibits reduced (70%) rate of meiotic cross over.                                                                                                                                                                                                                                                                                                                                          |
| YOR033C   | [EXO1] 5'-3' exonuclease and flap-endonuclease involved in recombination, double-strand break repair and DNA mismatch repair; member of the Rad2p nuclease family, with conserved N and I nuclease domains exonuclease Mutants demonstrate sensitivity to cycloheximide, bleomycin, actinomycin D, 5-fluorouracil, and several other antibiotics, as well as irregular shapes and sensitivity to zymolase digestion                                                                                                                                                                                              |
| YOL090W   | [MSH2] Protein that forms heterodimers with Msh3p and Msh6p that bind to DNA mismatches to initiate the mismatch repair process; contains a Walker ATP-binding motif required for repair activity; Msh2p-Msh6p binds to and hydrolyzes ATP mutS homolog Haploid mutants display 85-fold increased rate of spontaneous mutation to canavanine resistance. Mutants are defective for gene conversion polarity gradients and high spore viability. Inactivation of MSH2 causes high rates of accumulation of both base-substitution and frameshift mutations.                                                       |
| YMR167W   | [MLH1] Protein required for mismatch repair in mitosis and meiosis, postmeiotic segregation, and spore viability; forms a complex with Pms1p and Msh2p to repair mismatched DNA; human homolog is associated with hereditary non-polyposis colon cancer mutL homolog Null mutant is viable; displays a dramatic increase in the instability of simple sequence repeats, disruption of the MLH1 gene in diploid strains causes increased spore lethality; mlh1 delta pms1 delta double mutant are indistinguishable from those of the mlh1 delta and pms1 delta single mutants                                    |
| YNL082W   | [PMS1] ATP-binding protein required for mismatch repair in mitosis and meiosis; functions as a heterodimer with Mlh1p, binds double- and single-stranded DNA via its N-terminal domain, similar to E. coli MutL mutL homologs similar to Mlh1p; associates with Mlh1p, forming a heterodimer that then forms a ternary complex with either Msh2p-Msh3p or Msh2p-Msh6p bound to mismatched DNA Null mutant is viable; postmeiotic segregation increased                                                                                                                                                           |
| 0627      |                                                                                                                                                                                                                                                                                                                                                                                                                                                                                                                                                                                                                  |
| YLR226W   | [BUR2] Cyclin for the Sgv1p (Bur1p) protein kinase; Sgv1p and Bur2p comprise a CDK-cyclin complex involved in transcriptional regulation through its phosphorylation of the carboxy-terminal domain of the largest subunit of RNA polymerase II Uncharacterized mutant allele causes increased transcription of SUC2 in the absence of its UAS; Overexpression induces chromosome loss                                                                                                                                                                                                                           |
| YJL158C   | [CIS3] Mannose-containing glycoprotein constituent of the cell wall; member of the PIR (proteins with internal repeats) family released from SDS-extracted cell walls by laminarinase similar to Hsp150p and Pir1p, Pir2p, and Pir3p Null mutant is viable; CIS3 is a high copy suppressor of cik1 deletion mutants                                                                                                                                                                                                                                                                                              |
| YJR030C   |                                                                                                                                                                                                                                                                                                                                                                                                                                                                                                                                                                                                                  |
| 0628      |                                                                                                                                                                                                                                                                                                                                                                                                                                                                                                                                                                                                                  |
| YIL158W   |                                                                                                                                                                                                                                                                                                                                                                                                                                                                                                                                                                                                                  |
| YIR002C   | [MPH1] Member of the DEAH family of helicases, functions in an error-free DNA damage bypass pathway that involves homologous recombination, mutations confer a mutator phenotype                                                                                                                                                                                                                                                                                                                                                                                                                                 |
| 0629      | GO_TERM:[response to DNA damage stimulus] P-Value:1.4e-14 OVERLAP:[Replication factor A complex] <410.40.20> SIZE:3                                                                                                                                                                                                                                                                                                                                                                                                                                                                                              |
| YGR094W   | [VAS1] Mitochondrial and cytoplasmic valyl-tRNA synthetase valine-tRNA ligase                                                                                                                                                                                                                                                                                                                                                                                                                                                                                                                                    |
| YMR234W   | [RNH1] Ribonuclease H1, removes RNA primers during Okazaki fragment synthesis; degrades RNA attached to the 5'-end of a DNA strand ribonuclease H                                                                                                                                                                                                                                                                                                                                                                                                                                                                |
| YBL088C   | [TEL1] Protein kinase, primarily involved in telomere length regulation; contributes to cell cycle checkpoint control in response to DNA damage; functionally redundant with Mec1p; homolog of human ataxia telangiectasia (ATM) gene                                                                                                                                                                                                                                                                                                                                                                            |
| YBR145W   | [ADH5] Alcohol dehydrogenase isoenzyme V; involved in ethanol production alcohol dehydrogenase isoenzyme V                                                                                                                                                                                                                                                                                                                                                                                                                                                                                                       |
| YFL014W   | [HSP12] Plasma membrane localized protein that protects membranes from desiccation; induced by heat shock, oxidative stress, osmotic stress, stationary phase entry, glucose depletion, oleate and alcohol; regulated by the HOG and Ras-Pka pathways heat shock protein 12 Null mutant is viable, but shows induction of heat shock response under conditions normally associated with low-level HSP12 expression                                                                                                                                                                                               |
| YJR144W   | [MGM101] Protein involved in mitochondrial genome maintenance; component of the mitochondrial nucleoid, required for the repair of oxidative mtDNA damage mitochondrial nucleoid protein Null mutant is viable. Meiotic segregants with a disrupted mgm101 allele cannot undergo more than 10 divisions on glycerol medium.                                                                                                                                                                                                                                                                                      |
| YDR217C   | [RAD9] DNA damage-dependent checkpoint protein, required for cell-cycle arrest in G1/S, intra-S, and G2/M; transmits checkpoint signal by activating Rad53p and Chk1p; hyperphosphorylated by Mec1p and Tel1p; potential Cdc28p substrate cell cycle arrest protein radiation sensitive                                                                                                                                                                                                                                                                                                                          |
| YCR028C-A | [RIM1] Single-stranded DNA-binding protein essential for mitochondrial genome maintenance; involved in mitochondrial DNA replication DNA binding protein                                                                                                                                                                                                                                                                                                                                                                                                                                                         |
| YBR073W   | [RDH54] DNA-dependent ATPase, stimulates strand exchange by modifying the topology of double-stranded DNA; involved in the recombinational repair of double-strand breaks in DNA during mitosis and meiosis; proposed to be involved in crossover interference helicase (putative) similar to RAD54 Required for meiosis. Early meiotic induction of gene conversion is wild-type in a tid1 deletion but mature crossover products form slowly and cells block with single nuclei even though the spindle pole bodies duplicate and separate twice, as if progressing to entry into the second meiotic division. |
| YHR164C   | [DNA2] Essential tripartite DNA replication factor with single-stranded DNA-dependent ATPase, ATP-dependent nuclease, and helicase activities; required for Okazaki fragment processing; involved in DNA repair pathways; potential Cdc28p substrate DNA replication helicase                                                                                                                                                                                                                                                                                                                                    |
| YCR092C   | [MSH3] Mismatch repair protein, forms dimers with Msh2p that mediate repair of insertion or deletion mutations and removal of nonhomologous DNA ends, contains a PCNA (Pol30p) binding motif required for genome stability forms a complex with Msh2p to repair insertion-deletion mispairs; redundant with Pms3/Msh6p in repair of insertion-deletion mispairs mutS homolog Null mutant is viable. Inactivation of MSH3 results in low rates of frameshift mutations.                                                                                                                                           |

|                |                                                                                                                                                                                                                                                                                                                                                                                                                                                                                                                                                                                                                                                                                                                                                           |
|----------------|-----------------------------------------------------------------------------------------------------------------------------------------------------------------------------------------------------------------------------------------------------------------------------------------------------------------------------------------------------------------------------------------------------------------------------------------------------------------------------------------------------------------------------------------------------------------------------------------------------------------------------------------------------------------------------------------------------------------------------------------------------------|
| YDR499W        | [LCD1] Essential protein required for the DNA integrity checkpoint pathways; interacts physically with Mec1p; putative homolog of <i>S. pombe</i> Rad26 and human ATRIP Null mutant is inviable. Null mutant is rescued by deletion of SML1, but deletion of SML1 does not suppress the hypersensitivity to DNA damaging agents caused by the absence of DDC2.                                                                                                                                                                                                                                                                                                                                                                                            |
| YBR136W        | [MEC1] Genome integrity checkpoint protein and PI kinase superfamily member; signal transducer required for cell cycle arrest and transcriptional responses prompted by damaged or unrepllicated DNA; monitors and participates in meiotic recombination Null mutant is inviable; overproduction of Rad53p rescues some <i>esr1</i> alleles                                                                                                                                                                                                                                                                                                                                                                                                               |
| YML032C        | [RAD52] Protein that stimulates strand exchange by facilitating Rad51p binding to single-stranded DNA; anneals complementary single-stranded DNA; involved in the repair of double-strand breaks in DNA during vegetative growth and meiosis Null mutant is viable, radiation sensitive; <i>rad52 rad27</i> double mutants are inviable, double strand break ends are excessively recessed in mutant, <i>rad52</i> is rescued by <i>rad50 spo13</i> , but not <i>spo13</i> , and is classified as late recombination gene. Growth defects of <i>mgs1 rad18</i> double mutants are suppressed by overexpression of Rad52. Deletion of this homologous recombination (HR) gene decreases psoralen-induced recombination and increases mutation frequencies. |
| YDL156W        |                                                                                                                                                                                                                                                                                                                                                                                                                                                                                                                                                                                                                                                                                                                                                           |
| <b>YAR007C</b> | [RFA1] Subunit of heterotrimeric Replication Factor A (RF-A), which is a highly conserved single-stranded DNA binding protein involved in DNA replication, repair, and recombination RF-A heterotrimeric RPA (RF-A) single-stranded DNA binding protein 69 kDa subunit Null mutant is inviable; cells lacking RFA1 accumulate as multiply budded cells with a single nucleus suggesting a defect in DNA replication; <i>rfa1</i> repair defects are suppressed by high copy RAD52                                                                                                                                                                                                                                                                         |
| <b>YJL173C</b> | [RFA3] Subunit of heterotrimeric Replication Factor A (RF-A), which is a highly conserved single-stranded DNA binding protein involved in DNA replication, repair, and recombination replication factor-A subunit 3 Null mutant is inviable and arrests as budded and multiply budded cells                                                                                                                                                                                                                                                                                                                                                                                                                                                               |
| YDR097C        | [MSH6] Protein required for mismatch repair in mitosis and meiosis, forms a complex with Msh2p to repair both single-base & insertion-deletion mispairs; potentially phosphorylated by Cdc28p human GTBP protein homolog Mutations in MSH6 or MSH3 cause partial defects in MMR, with inactivation of MSH6 resulting in high rates of base-substitution mutations and low rates of frameshift mutations; <i>msh3 msh6</i> double deletion mutants exhibit microsatellite instability and mutability similar to that in a <i>msh2</i> mutant.                                                                                                                                                                                                              |
| <b>YNL312W</b> | [RFA2] Subunit of heterotrimeric Replication Factor A (RF-A), which is a highly conserved single-stranded DNA binding protein involved in DNA replication, repair, and recombination 29% identical to the human p34 subunit of RF-A replication factor RF-A subunit 2 Null mutant is inviable; arrests as budded and multiply budded cells; <i>rfa2</i> (ts) cells have a mutator and a hyper-recombination phenotype and are more sensitive to hydroxyurea and methyl-methane-sulfonate than wild-type cells                                                                                                                                                                                                                                             |
| 0630           | GO_TERM:[tricarboxylic acid cycle] P-Value:1.6e-03 OVERLAP:[other respiration chain complexes] <420.60> SIZE:14                                                                                                                                                                                                                                                                                                                                                                                                                                                                                                                                                                                                                                           |
| YJL078C        | [PRY3] Protein of unknown function, has similarity to Pry1p and Pry2p and to the plant PR-1 class of pathogen related proteins                                                                                                                                                                                                                                                                                                                                                                                                                                                                                                                                                                                                                            |
| YDL241W        |                                                                                                                                                                                                                                                                                                                                                                                                                                                                                                                                                                                                                                                                                                                                                           |
| YKL157W        | [APE2] Zinc-dependent metallopeptidase <i>yscII</i> , may have a role in obtaining leucine from dipeptide substrates; sequence coordinates have changed since RT-PCR analysis showed that the adjacent ORF YKL158W comprises the 5' exon of APE2/YKL157W aminopeptidase <i>yscII</i>                                                                                                                                                                                                                                                                                                                                                                                                                                                                      |
| <b>YNR001C</b> | [CIT1] Citrate synthase, catalyzes the condensation of acetyl coenzyme A and oxaloacetate to form citrate; the rate-limiting enzyme of the TCA cycle; nuclear encoded mitochondrial protein citrate synthase Null mutant is viable; disruption of both CIT1 and CIT2 result in glutamate auxotrophy and poor growth on rich medium containing lactate                                                                                                                                                                                                                                                                                                                                                                                                     |
| YER054C        | [GIP2] Putative regulatory subunit of the protein phosphatase Glc7p, involved in glycogen metabolism; contains a conserved motif (GVNK motif) that is also found in <i>Gac1p</i> , <i>Pig1p</i> , and <i>Pig2p</i>                                                                                                                                                                                                                                                                                                                                                                                                                                                                                                                                        |
| <b>YKL085W</b> | [MDH1] Mitochondrial malate dehydrogenase, catalyzes interconversion of malate and oxaloacetate; involved in the tricarboxylic acid (TCA) cycle malate dehydrogenase                                                                                                                                                                                                                                                                                                                                                                                                                                                                                                                                                                                      |
| 0631           | GO_TERM:[AMP-activated protein kinase activity] P-Value:2.0e-10 OVERLAP:[SNF1 complex] <470.10> SIZE:6                                                                                                                                                                                                                                                                                                                                                                                                                                                                                                                                                                                                                                                    |
| YDR466W        | [PKH3] Protein kinase with similarity to mammalian phosphoinositide-dependent kinase 1 (PDK1) and yeast <i>Pkh1p</i> and <i>Pkh2p</i> , two redundant upstream activators of <i>Pkc1p</i> ; identified as a multicopy suppressor of a <i>pkh1 pkh2</i> double mutant                                                                                                                                                                                                                                                                                                                                                                                                                                                                                      |
| YLR228C        | [ECM22] Sterol regulatory element binding protein, regulates transcription of the sterol biosynthetic genes <i>ERG2</i> and <i>ERG3</i> ; member of the fungus-specific Zn[2]-Cys[6] binuclear cluster family of transcription factors; homologous to <i>Upc2p</i>                                                                                                                                                                                                                                                                                                                                                                                                                                                                                        |
| YMR015C        | [ERG5] C-22 sterol desaturase, a cytochrome P450 enzyme that catalyzes the formation of the C-22(23) double bond in the sterol side chain in ergosterol biosynthesis; may be a target of azole antifungal drugs cytochrome P450 involved in C-22 denaturation of the ergosterol side-chain                                                                                                                                                                                                                                                                                                                                                                                                                                                                |
| YMR280C        | [CAT8] Zinc cluster transcriptional activator necessary for derepression of a variety of genes under non-fermentative growth conditions, active after diauxic shift, binds carbon source responsive elements zinc-cluster protein involved in activating gluconeogenic genes; related to Gal4p Null mutant is viable but unable to grow on non-fermentable carbon sources due to failure to derepress all major gluconeogenic enzymes; overexpression of <i>Cat8p</i> suppress inability of <i>snf1</i> and <i>snf4</i> mutants to grow on ethanol                                                                                                                                                                                                        |
| YML110C        | [COQ5] 2-hexaprenyl-6-methoxy-1,4-benzoquinone methyltransferase, involved in ubiquinone (Coenzyme Q) biosynthesis; located in mitochondria C-methyltransferase (putative) Null mutant is viable, respiratory deficient, petite.                                                                                                                                                                                                                                                                                                                                                                                                                                                                                                                          |
| YPR160W        | [GPH1] Non-essential glycogen phosphorylase required for the mobilization of glycogen, activity is regulated by cyclic AMP-mediated phosphorylation, expression is regulated by stress-response elements and by the HOG MAP kinase pathway glycogen phosphorylase Null mutant is viable; haploid cells contain higher levels of intracellular glycogen                                                                                                                                                                                                                                                                                                                                                                                                    |
| YLR420W        | [URA4] Dihydroorotase, catalyzes the third enzymatic step in the de novo biosynthesis of pyrimidines, converting carbamoyl-L-aspartate into dihydroorotate dihydroorotase Null mutant is viable and requires uracil                                                                                                                                                                                                                                                                                                                                                                                                                                                                                                                                       |
| <b>YJL089W</b> | [SIP4] C6 zinc cluster transcriptional activator that binds to the carbon source-responsive element (CSRE) of gluconeogenic genes; involved in the positive regulation of gluconeogenesis; regulated by <i>Snf1p</i> protein kinase; localized to the nucleus                                                                                                                                                                                                                                                                                                                                                                                                                                                                                             |

|                         |                                                                                                                                                                                                                                                                                                                                                                                                                                                                                                                                                                                        |
|-------------------------|----------------------------------------------------------------------------------------------------------------------------------------------------------------------------------------------------------------------------------------------------------------------------------------------------------------------------------------------------------------------------------------------------------------------------------------------------------------------------------------------------------------------------------------------------------------------------------------|
| <a href="#">YDR422C</a> | [SIP1] Alternate beta-subunit of the Snf1p kinase complex, may confer substrate specificity; vacuolar protein containing KIS (Kinase-Interacting Sequence) and ASC (Association with Snf1 kinase Complex) domains involved in protein interactions protein kinase complex component Null mutant is viable, exhibits a slight increase in GAL gene expression                                                                                                                                                                                                                           |
| <a href="#">YGL208W</a> | [SIP2] One of three beta subunits of the Snf1 serine/threonine protein kinase complex involved in the response to glucose starvation; null mutants exhibit accelerated aging; N-myristoylprotein localized to the cytoplasm and the plasma membrane                                                                                                                                                                                                                                                                                                                                    |
| <a href="#">YDR028C</a> | [REG1] Regulatory subunit of type 1 protein phosphatase Glc7p, involved in negative regulation of glucose-repressible genes Glc7p regulatory subunit                                                                                                                                                                                                                                                                                                                                                                                                                                   |
| <a href="#">YDR477W</a> | [SNF1] AMP-activated serine/threonine protein kinase found in a complex containing Snf4p and members of the Sip1p/Sip2p/Gal83p family; required for transcription of glucose-repressed genes, thermotolerance, sporulation, and peroxisome biogenesis serine/threonine kinase Null mutant is viable, sensitive to heat stress and starvation and fails to accumulate glycogen during growth in rich medium; sucrose nonfermenting, high copy MS11 and PDE2 partially suppress snf1 sporulation defects                                                                                 |
| <a href="#">YER129W</a> | [SAK1] Upstream kinase for the SNF1 complex; partially redundant function with Elm1p and Tos3p; members of this family of kinases have functional orthology with LKB1, a mammalian kinase associated with Peutz-Jeghers cancer-susceptibility syndrome                                                                                                                                                                                                                                                                                                                                 |
| <a href="#">YDR419W</a> | [RAD30] DNA polymerase eta, involved in the predominantly error-free bypass replication of DNA lesions, catalyzes the efficient and accurate synthesis of DNA opposite cyclobutane pyrimidine dimers; homolog of human POLH and bacterial DinB proteins DNA polymerase eta Null mutant shows increased sensitivity to UV (254 nm). Deletion of RAD30 did not affect spontaneous mutagenesis. Overproduction of Rad30p slightly mutagenic in wild-type yeast strain, moderately mutagenic in strains with inactive 3'->5'-exonuclease of DNA polymerase epsilon or DNA mismatch repair. |
| <a href="#">YER027C</a> | [GAL83] One of three possible beta-subunits of the Snf1 kinase complex, allows nuclear localization of the Snf1 kinase complex in the presence of a nonfermentable carbon source; contains glycogen-binding domain                                                                                                                                                                                                                                                                                                                                                                     |
| <a href="#">YGL115W</a> | [SNF4] Protein kinase activator found in a complex containing Snf1p and members of the Sip1p/Sip2p/Gal83p family; activates the Snf1p protein kinase; involved in expression of glucose-repressed genes, sporulation, and peroxisome biogenesis associates with Snf1p Null mutant is viable, sucrose nonfermenting; high copy MS11 and PDE2 partially suppress sporulation defect                                                                                                                                                                                                      |
| 0632                    | GO_TERM:[pyruvate carboxylase activity] P-Value:9.3e-07 OVERLAP:[Actin-associated proteins] <140.20.20> SIZE:25                                                                                                                                                                                                                                                                                                                                                                                                                                                                        |
| <a href="#">YBR218C</a> | [PYC2] Pyruvate carboxylase isoform, cytoplasmic enzyme that converts pyruvate to oxaloacetate; highly similar to isoform Pyc1p but differentially regulated; mutations in the human homolog are associated with lactic acidosis pyruvate carboxylase Null mutant is viable; pyc1 pyc2 double mutant is unable to grow on glucose as sole carbon source unless aspartate is added to the medium                                                                                                                                                                                        |
| <a href="#">YGL062W</a> | [PYC1] Pyruvate carboxylase isoform, cytoplasmic enzyme that converts pyruvate to oxaloacetate; highly similar to isoform Pyc2p but differentially regulated; mutations in the human homolog are associated with lactic acidosis pyruvate carboxylase Null mutant is viable but shows greatly reduced pyruvate decarboxylase activity and cannot grow on ethanol in the absence of aspartate; pyc1 pyc2 double mutant is unable to grow on glucose as sole carbon source unless aspartate is added to the medium                                                                       |
| <a href="#">YDL072C</a> | [YET3] Endoplasmic reticulum transmembrane protein, homolog of human BAP31 protein homolog of mammalian BAP31                                                                                                                                                                                                                                                                                                                                                                                                                                                                          |
| <a href="#">YNL079C</a> | [TPM1] Major isoform of tropomyosin; binds to and stabilizes actin cables and filaments, which direct polarized cell growth and the distribution of several organelles; acetylated by the NatB complex and acetylated form binds actin most efficiently tropomyosin I Null mutant is viable, grows slowly, exhibits cell size heterogeneity, has delocalized deposition of chitin, mates poorly; exhibits loss of actin cables                                                                                                                                                         |
| 0633                    | OVERLAP:[other respiration chain complexes] <420.60> SIZE:14                                                                                                                                                                                                                                                                                                                                                                                                                                                                                                                           |
| <a href="#">YLR371W</a> | [ROM2] GDP/GTP exchange protein (GEP) for Rho1p and Rho2p; mutations are synthetically lethal with mutations in rom1, which also encodes a GEP Null mutant is viable but shows temperature- and cold-sensitive growth defects at 37 and 11 degrees, increased sensitivity to benomyl, and elongated buds and abnormal mating projections at the permissive temperature; synthetically lethal with rom1                                                                                                                                                                                 |
| <a href="#">YDL085W</a> | [NDE2] Mitochondrial external NADH dehydrogenase, catalyzes the oxidation of cytosolic NADH; Nde1p and Nde2p are involved in providing the cytosolic NADH to the mitochondrial respiratory chain Type II NAD(P)H:quinone oxidoreductase                                                                                                                                                                                                                                                                                                                                                |
| <a href="#">YHR204W</a> | [MNL1] Alpha mannosidase-like protein of the endoplasmic reticulum required for degradation of glycoproteins but not for processing of N-linked oligosaccharides                                                                                                                                                                                                                                                                                                                                                                                                                       |
| 0634                    | GO_TERM:[organelle part] P-Value:9.8e-01                                                                                                                                                                                                                                                                                                                                                                                                                                                                                                                                               |
| <a href="#">YDR452W</a> | [PPN1] Vacuolar endopolyphosphatase with a role in phosphate metabolism; functions as a homodimer vacuolar endopolyphosphatase Null mutant is viable and shows accumulation of long chain polyphosphate; a double mutant of <i>PPN1</i> and <i>PPX1</i> (the gene encoding a potent exopolyphosphatase) loses viability rapidly in stationary phase.                                                                                                                                                                                                                                   |
| <a href="#">YHR161C</a> | [YAP1801] Protein involved in clathrin cage assembly; binds Pan1p and clathrin; homologous to Yap1802p, member of the AP180 protein family                                                                                                                                                                                                                                                                                                                                                                                                                                             |
| 0635                    |                                                                                                                                                                                                                                                                                                                                                                                                                                                                                                                                                                                        |
| <a href="#">YDL161W</a> | [ENT1] Epsin-like protein involved in endocytosis and actin patch assembly and functionally redundant with Ent2p; binds clathrin via a clathrin-binding domain motif at C-terminus Null mutant is viable, synthetically lethal with ent2 (YLR206w). ent1/2 double mutants have endocytosis and actin cytoskeleton defects.                                                                                                                                                                                                                                                             |
| <a href="#">YOR111W</a> |                                                                                                                                                                                                                                                                                                                                                                                                                                                                                                                                                                                        |

|                |                                                                                                                                                                                                                                                                                                                                                                                                                                                                                                                                                                                                                                                                                                                |
|----------------|----------------------------------------------------------------------------------------------------------------------------------------------------------------------------------------------------------------------------------------------------------------------------------------------------------------------------------------------------------------------------------------------------------------------------------------------------------------------------------------------------------------------------------------------------------------------------------------------------------------------------------------------------------------------------------------------------------------|
| 0636           | GO_TERM:[clathrin binding] P-Value:1.3e-04 OVERLAP:[AP-1 complex] <260.20.10> SIZE:4                                                                                                                                                                                                                                                                                                                                                                                                                                                                                                                                                                                                                           |
| YFR043C        | [YFR043C] Hypothetical protein; null mutant displays increased levels of spontaneous Rad52 foci                                                                                                                                                                                                                                                                                                                                                                                                                                                                                                                                                                                                                |
| YFR045W        |                                                                                                                                                                                                                                                                                                                                                                                                                                                                                                                                                                                                                                                                                                                |
| YBR019C        | [GAL10] UDP-glucose-4-epimerase, catalyzes the interconversion of UDP-galactose and UDP-D-glucose in galactose metabolism; also catalyzes the conversion of alpha-D-glucose or alpha-D-galactose to their beta-anomers UDP-glucose 4-epimerase Null mutant is viable and cannot utilize galactose.                                                                                                                                                                                                                                                                                                                                                                                                             |
| YFL034W        |                                                                                                                                                                                                                                                                                                                                                                                                                                                                                                                                                                                                                                                                                                                |
| YHL019C        | [APM2] Protein of unknown function, homologous to the medium chain of mammalian clathrin-associated protein complex; involved in vesicular transport                                                                                                                                                                                                                                                                                                                                                                                                                                                                                                                                                           |
| <b>YLR170C</b> | [APS1] Small subunit of the clathrin-associated adaptor complex AP-1, which is involved in protein sorting at the trans-Golgi network; homolog of the sigma subunit of the mammalian clathrin AP-1 complex clathrin associated protein complex small subunit Null mutant is viable; aps1 mutants demonstrate synthetic effects with chc1 alleles                                                                                                                                                                                                                                                                                                                                                               |
| 0637           | GO_TERM:[clathrin coat] P-Value:2.9e-15 OVERLAP:[AP-1 complex] <260.20.10> SIZE:4                                                                                                                                                                                                                                                                                                                                                                                                                                                                                                                                                                                                                              |
| <b>YKL135C</b> | [APL2] Beta-adaptin, large subunit of the clathrin-associated protein (AP-1) complex; binds clathrin; involved in clathrin-dependent Golgi protein sorting beta-adaptin clathrin associated protein complex large subunit                                                                                                                                                                                                                                                                                                                                                                                                                                                                                      |
| <b>YPR029C</b> | [APL4] Gamma-adaptin, large subunit of the clathrin-associated protein (AP-1) complex; binds clathrin; involved in vesicle mediated transport clathrin associated protein complex large subunit gamma-adaptin                                                                                                                                                                                                                                                                                                                                                                                                                                                                                                  |
| YGR167W        | [CLC1] Clathrin light chain, subunit of the major coat protein involved in intracellular protein transport and endocytosis; thought to regulate clathrin function, two Clathrin heavy chains (CHC1) form the clathrin triskelion structural component clathrin light chain Null mutant is viable but slow-growing and shows defects in receptor-mediated endocytosis, maturation of alpha factor and levels of clathrin heavy chain (Chc1p); high copy suppresses the inviable double mutant chc1-delete, scd1-i-allele; elevated CHC1 expression suppresses some clc1-delete phenotypes                                                                                                                       |
| YDR153C        | [ENT5] Protein containing an N-terminal epsin-like domain involved in clathrin recruitment and traffic between the Golgi and endosomes; associates with the clathrin adaptor Gga2p, clathrin adaptor complex AP-1, and clathrin                                                                                                                                                                                                                                                                                                                                                                                                                                                                                |
| YHR108W        | [GGA2] Golgi-localized protein with homology to gamma-adaptin, interacts with and regulates Arf1p and Arf2p in a GTP-dependent manner in order to facilitate traffic through the late Golgi ARF-binding protein Single and double knockouts are viable at both 30 C and 37 C. Cells lacking GGA1, GGA2 exhibit defects in invertase processing, vacuolar morphology, maturation of alpha-factor, and sorting of CPY, proteinase A to the vacuole, but not endocytosis.                                                                                                                                                                                                                                         |
| YGL206C        | [CHC1] Clathrin heavy chain, subunit of the major coat protein involved in intracellular protein transport and endocytosis; two heavy chains form the clathrin triskelion structural component; the light chain (CLC1) is thought to regulate function Clathrin heavy chain Null mutant is viable, but is slow-growing and shows defects in mating, sporulation and vesicle ultrastructure (however it shows little or no defect in secretion); null mutants easily become inviable due to second site mutations in a number of unlinked genes such as SCD1 and CDL1. Null mutants also exhibit an endocytosis defect, late Golgi protein mislocalization. chc1-5 exhibits delayed vacuolar protein transport. |
| YJR125C        | [ENT3] Protein containing an N-terminal epsin-like domain involved in clathrin recruitment and traffic between the Golgi and endosomes; associates with the clathrin adaptor Gga2p                                                                                                                                                                                                                                                                                                                                                                                                                                                                                                                             |
| 0638           | GO_TERM:[mitochondrial fission] P-Value:4.1e-12 OVERLAP:[Chaperonine containing T-complex TRiC (TCP RING Complex)] <130> SIZE:8                                                                                                                                                                                                                                                                                                                                                                                                                                                                                                                                                                                |
| <b>YJL014W</b> | [CCT3] Subunit of the cytosolic chaperonin Cct ring complex, related to Tcp1p, required for the assembly of actin and tubulins in vivo gamma chaperonin subunit Defects in microtubule and actin assembly in vivo, aberrant chromosome segregation, supersensitivity to benomyl                                                                                                                                                                                                                                                                                                                                                                                                                                |
| YHR001W        | [OSH7] Member of an oxysterol-binding protein family with seven members in S. cerevisiae; family members have overlapping, redundant functions in sterol metabolism and collectively perform a function essential for viability                                                                                                                                                                                                                                                                                                                                                                                                                                                                                |
| YBL029W        |                                                                                                                                                                                                                                                                                                                                                                                                                                                                                                                                                                                                                                                                                                                |
| YKR036C        | [CAF4] WD40 repeat-containing protein associated with the CCR4-NOT complex, interacts in a Ccr4p-dependent manner with Ssn2p CCR4 transcriptional complex component                                                                                                                                                                                                                                                                                                                                                                                                                                                                                                                                            |
| YLL001W        | [DNM1] Dynamamin-related GTPase required for mitochondrial fission and the maintenance of mitochondrial morphology, assembles on the cytoplasmic face of mitochondrial tubules at sites at which division will occur; also participates in endocytosis similar to dynamin GTPase Null mutant is viable, shows mating defects consistent with a delay in receptor-mediated endocytosis                                                                                                                                                                                                                                                                                                                          |
| YIL065C        | [FIS1] Mitochondrial outer membrane protein involved in membrane fission, required for localization of Dnm1p and Mdv1p during mitochondrial division Null mutant is viable, mitochondrial fission blocked, mitochondrial membranes form nets                                                                                                                                                                                                                                                                                                                                                                                                                                                                   |
| YJL112W        | [MDV1] Peripheral protein of the cytosolic face of the mitochondrial outer membrane, required for mitochondrial fission; interacts with Fis1p and with the dynamin-related GTPase Dnm1p; contains WD repeats Null mutant is viable, mitochondrial fission blocked, mitochondrial membranes form nets                                                                                                                                                                                                                                                                                                                                                                                                           |
| 0639           | GO_TERM:[cell organization and biogenesis] P-Value:2.3e-01                                                                                                                                                                                                                                                                                                                                                                                                                                                                                                                                                                                                                                                     |
| YDR141C        | [DOP1] Protein of unknown function, essential for viability, involved in establishing cellular polarity and morphogenesis; green fluorescent protein (GFP)-fusion protein localizes to the cytoplasm in a punctate pattern essential gene                                                                                                                                                                                                                                                                                                                                                                                                                                                                      |

|                         |                                                                                                                                                                                                                                                                                                                                                                                                                                                                                                                                                                                                                                                          |
|-------------------------|----------------------------------------------------------------------------------------------------------------------------------------------------------------------------------------------------------------------------------------------------------------------------------------------------------------------------------------------------------------------------------------------------------------------------------------------------------------------------------------------------------------------------------------------------------------------------------------------------------------------------------------------------------|
| YNL297C                 | [MON2] Peripheral membrane protein with a role in endocytosis and vacuole integrity, interacts with Arl1p and localizes to the endosome; member of the Sec7p family of proteins                                                                                                                                                                                                                                                                                                                                                                                                                                                                          |
| 0640                    |                                                                                                                                                                                                                                                                                                                                                                                                                                                                                                                                                                                                                                                          |
| YFL042C                 |                                                                                                                                                                                                                                                                                                                                                                                                                                                                                                                                                                                                                                                          |
| YMR303C                 | [ADH2] Glucose-repressible alcohol dehydrogenase II, catalyzes the conversion of ethanol to acetaldehyde; involved in the production of certain carboxylate esters; regulated by ADR1 alcohol dehydrogenase II                                                                                                                                                                                                                                                                                                                                                                                                                                           |
| 0641                    | GO_TERM:[DNA recombination] P-Value:3.2e-02 OVERLAP:[DNA polymerase epsilon (II)] <410.40.100> SIZE:3                                                                                                                                                                                                                                                                                                                                                                                                                                                                                                                                                    |
| <a href="#">YBR278W</a> | [DPB3] Third-largest subunit of DNA polymerase II (DNA polymerase epsilon), required to maintain fidelity of chromosomal replication and also for inheritance of telomeric silencing; mRNA abundance peaks at the G1/S boundary of the cell cycle DNA polymerase II C and C' subunits Null mutant is viable, shows increased spontaneous mutation rate                                                                                                                                                                                                                                                                                                   |
| YIL006W                 | [YIA6] Mitochondrial NAD <sup>+</sup> transporter, involved in the transport of NAD <sup>+</sup> into the mitochondria (see also YEA6); member of the mitochondrial carrier subfamily; disputed role as a pyruvate transporter; has putative mouse and human orthologs NAD <sup>+</sup> transporter                                                                                                                                                                                                                                                                                                                                                      |
| YPR122W                 | [AXL1] Haploid specific endoprotease that performs one of two N-terminal cleavages during maturation of a-factor mating pheromone; required for axial budding pattern of haploid cells Null mutant is viable; exhibits reduced a-factor expression; haploid mutants show bipolar budding pattern (diploid pattern) rather than the normal axial (spiral) budding pattern                                                                                                                                                                                                                                                                                 |
| YKL011C                 | [CCE1] Mitochondrial cruciform cutting endonuclease, cleaves Holliday junctions formed during recombination of mitochondrial DNA cruciform cutting endonuclease Null mutant is viable, exhibits a higher than normal frequency of appearance of petite cells                                                                                                                                                                                                                                                                                                                                                                                             |
| YPL283C                 | [YRF1-7] Helicase encoded by the Y' element of subtelomeric regions, highly expressed in the mutants lacking the telomerase component TLC1; potentially phosphorylated by Cdc28p Y'-helicase protein I                                                                                                                                                                                                                                                                                                                                                                                                                                                   |
| 0642                    | GO_TERM:[catalytic activity] P-Value:7.3e-02                                                                                                                                                                                                                                                                                                                                                                                                                                                                                                                                                                                                             |
| YDR143C                 | [SAN1] Ubiquitin-protein ligase, involved in the proteasome-dependent degradation of aberrant nuclear proteins; san1 mutations suppress sir4, spt16, and cdc68 mutations, suggesting a role in chromatin silencing Null mutant is viable, and null mutations are allele-nonspecific suppressors of mutations in SIR4. san1 null mutations also suppress mutations in cdc68.                                                                                                                                                                                                                                                                              |
| YPL113C                 |                                                                                                                                                                                                                                                                                                                                                                                                                                                                                                                                                                                                                                                          |
| 0643                    | GO_TERM:[DNA-dependent DNA replication] P-Value:6.9e-28 OVERLAP:[Pre-replication complex (pre-RC)] <410.30> SIZE:16                                                                                                                                                                                                                                                                                                                                                                                                                                                                                                                                      |
| YOL146W                 | [PSF3] Subunit of the GINS complex (Sld5p, Psf1p, Psf2p, Psf3p), which is localized to DNA replication origins and implicated in assembly of the DNA replication machinery subunit of the GINS complex                                                                                                                                                                                                                                                                                                                                                                                                                                                   |
| YDR013W                 | [PSF1] Subunit of the GINS complex (Sld5p, Psf1p, Psf2p, Psf3p), which is localized to DNA replication origins and implicated in assembly of the DNA replication machinery subunit of the GINS complex                                                                                                                                                                                                                                                                                                                                                                                                                                                   |
| YJL072C                 | [PSF2] Subunit of the GINS complex (Sld5p, Psf1p, Psf2p, Psf3p), which is localized to DNA replication origins and implicated in assembly of the DNA replication machinery subunit of the GINS complex                                                                                                                                                                                                                                                                                                                                                                                                                                                   |
| YDL017W                 | [CDC7] DDK (Dbf4-dependent kinase) catalytic subunit required for firing origins and replication fork progression in mitosis through phosphorylation of Mcm2-7p complexes and Cdc45p; kinase activity correlates with cyclical DBF4 expression Cdc7p-Dbf4p kinase complex catalytic subunit Null mutant is inviable. cdc7 mutant arrests at G(sub)1/S phase with duplicated spindle pole bodies and no spindles; the spindle pole bodies eventually enlarge, invaginate from the nuclear envelope into the center of the nucleus, sometimes fragmenting into three or four smaller spindle pole bodies. In heterozygotes, cdc7 spores fail to germinate. |
| YCL061C                 | [MRC1] S-phase checkpoint protein found at replication forks, required for DNA replication; also required for Rad53p activation during DNA replication stress, where it forms a replication-pausing complex with Tof1p and is phosphorylated by Mec1p; protein involved in replication checkpoint Null: sensitive to hydroxyurea; replication checkpoint defective; slower DNA replication than wild type; partial loss of silencing at telomeres and HM loci; synthetic lethal with rad9 null, rad53-21, and mec1-21.                                                                                                                                   |
| YNL273W                 | [TOF1] Subunit of a replication-pausing checkpoint complex (Tof1p-Mrc1p-Csm3p) that acts at the stalled replication fork to promote sister chromatid cohesion after DNA damage, facilitating gap repair of damaged DNA; interacts with the MCM helicase                                                                                                                                                                                                                                                                                                                                                                                                  |
| <a href="#">YLR274W</a> | [CDC46] Component of the hexameric MCM complex, which is important for priming origins of DNA replication in G1 and becomes an active ATP-dependent helicase that promotes DNA melting and elongation when activated by Cdc7p-Dbf4p in S-phase Null mutant is inviable; at nonpermissive temperature cdc46(ts) mutants arrest with a large bud and a single nucleus and exhibit a high rate of recombination                                                                                                                                                                                                                                             |
| <a href="#">YGL201C</a> | [MCM6] Protein involved in DNA replication; component of the Mcm2-7 hexameric complex that binds chromatin as a part of the pre-replicative complex                                                                                                                                                                                                                                                                                                                                                                                                                                                                                                      |
| YIL150C                 | [MCM10] Essential, chromatin-associated protein involved in the initiation of DNA replication; required for the association of the MCM2-7 complex with replication origins                                                                                                                                                                                                                                                                                                                                                                                                                                                                               |
| <a href="#">YPR019W</a> | [CDC54] Essential helicase component of heterohexameric MCM2-7 complexes which bind pre-replication complexes on DNA and melt the DNA prior to replication; accumulates in the nucleus in G1; homolog of S. pombe Cdc21p Null mutant is inviable; at nonpermissive temperature cdc54(ts) mutants arrest with a large bud and a single nucleus and exhibit a high rate of recombination                                                                                                                                                                                                                                                                   |
| <a href="#">YBR202W</a> | [CDC47] Component of the hexameric MCM complex, which is important for priming origins of DNA replication in G1 and becomes an active ATP-dependent helicase that promotes DNA melting and elongation when activated by Cdc7p-Dbf4p in S-phase Null mutant is inviable, at nonpermissive temperature cdc47(ts) mutants arrest with a large bud and a single nucleus                                                                                                                                                                                                                                                                                      |
| <a href="#">YBL023C</a> | [MCM2] Protein involved in DNA replication; component of the Mcm2-7 hexameric complex that binds chromatin as a part of the pre-replicative complex Null mutant is inviable, at nonpermissive temperature mcm2(ts) mutants arrest with a large bud and a single nucleus, with < 2N DNA content, and exhibit a high rate of recombination; mcm2 mutants are defective in minichromosome maintenance; mcm2-1 cdc45-1 mutants are synthetically lethal                                                                                                                                                                                                      |

|                |                                                                                                                                                                                                                                                                                                                                                                                                                                                                                                          |
|----------------|----------------------------------------------------------------------------------------------------------------------------------------------------------------------------------------------------------------------------------------------------------------------------------------------------------------------------------------------------------------------------------------------------------------------------------------------------------------------------------------------------------|
| <b>YEL032W</b> | [MCM3] Protein involved in DNA replication; component of the Mcm2-7 hexameric complex that binds chromatin as a part of the pre-replicative complex Null mutant is inviable, at nonpermissive temperature mcm3(ts) mutants arrest with a large bud and a single nucleus and exhibit a high rate of recombination; mcm3 mutants are defective in minichromosome maintenance; mcm3-1 cdc45-1 mutants are synthetically lethal                                                                              |
| YDR489W        | [SLD5] Subunit of the GINS complex (Sld5p, Psf1p, Psf2p, Psf3p), which is localized to DNA replication origins and implicated in assembly of the DNA replication machinery subunit of the GINS complex                                                                                                                                                                                                                                                                                                   |
| <b>YLR103C</b> | [CDC45] DNA replication initiation factor; recruited to MCM pre-RC complexes at replication origins; promotes release of MCM from Mcm10p, recruits elongation machinery; mutants in human homolog may cause velocardiofacial and DiGeorge syndromes chromosomal DNA replication initiation protein required for minichromosome maintenance and chromosomal DNA replication                                                                                                                               |
| 0644           | GO_TERM:[replisome] P-Value:4.2e-21 OVERLAP:[DNA polymerase alpha (I) - primase complex] <410.40.60> SIZE:4                                                                                                                                                                                                                                                                                                                                                                                              |
| YDL102W        | [CDC2] Catalytic subunit of DNA polymerase delta; required for chromosomal DNA replication during mitosis and meiosis, intragenic recombination, repair of double strand DNA breaks, and DNA replication during nucleotide excision repair (NER) DNA polymerase III catalytic (delta) subunit Null mutant is inviable. cdc2 mutants arrest at the mononucleate stage with duplicated spindle pole bodies and no complete spindles. mgs1 mutation suppresses the temperature sensitivity of cdc2 mutants. |
| YJR006W        | [HYS2] DNA polymerase III (delta) subunit, essential for cell viability; involved in DNA replication and DNA repair DNA polymerase delta subunit                                                                                                                                                                                                                                                                                                                                                         |
| YJR043C        | [POL32] Third subunit of DNA polymerase delta, involved in chromosomal DNA replication; required for error-prone DNA synthesis in the presence of DNA damage and processivity; interacts with Hys2p, PCNA (Pol30p), and Pol1p DNA polymerase delta subunit Null mutant is viable but is cold-sensitive, hydroxyurea-sensitive, defective for induced mutagenesis, synthetic lethal with pol3, pol30 and pol31                                                                                            |
| YNL262W        | [POL2] Catalytic subunit of DNA polymerase epsilon, one of the major chromosomal DNA replication polymerases characterized by processivity and proofreading exonuclease activity; also involved in DNA synthesis during DNA repair DNA polymerase II                                                                                                                                                                                                                                                     |
| <b>YBL035C</b> | [POL12] B subunit of DNA polymerase alpha-primase complex, required for initiation of DNA replication during mitotic and premeiotic DNA synthesis; also functions in telomere capping and length regulation DNA polymerase alpha-primase complex B subunit                                                                                                                                                                                                                                               |
| <b>YNL102W</b> | [POL1] Catalytic subunit of the DNA polymerase alpha-primase complex, required for the initiation of DNA replication during mitotic DNA synthesis and premeiotic DNA synthesis DNA polymerase I alpha subunit p180 Null mutant is inviable. pol1(ts) mutants show blocked cell division at 36 degrees C                                                                                                                                                                                                  |
| <b>YIR008C</b> | [PRI1] Subunit of DNA primase, which is required for DNA synthesis and double-strand break repair DNA primase p48 polypeptide Null mutant is inviable; pri1 pri2 mutants are inviable                                                                                                                                                                                                                                                                                                                    |
| <b>YKL045W</b> | [PRI2] Subunit of DNA primase, which is required for DNA synthesis and double-strand break repair DNA primase p58 polypeptide lethal                                                                                                                                                                                                                                                                                                                                                                     |
| 0645           | GO_TERM:[nascent polypeptide-associated complex] P-Value:2.8e-06 OVERLAP:[NAC complex] <510.190.30> SIZE:2                                                                                                                                                                                                                                                                                                                                                                                               |
| <b>YHR193C</b> | [EGD2] Alpha subunit of the heteromeric nascent polypeptide-associated complex (NAC) involved in protein sorting and translocation, associated with cytoplasmic ribosomes GAL4 enhancer protein nascent-polypeptide-associated complex human alpha NAC subunit homolog                                                                                                                                                                                                                                   |
| YDR252W        | [BTT1] Beta3 subunit of the heterotrimeric nascent polypeptide-associated complex (alpha, beta1, beta3) which binds ribosomes via its beta-subunits in close proximity to nascent polypeptides                                                                                                                                                                                                                                                                                                           |
| YJR011C        |                                                                                                                                                                                                                                                                                                                                                                                                                                                                                                          |
| 0646           | GO_TERM:[CCR4-NOT complex] P-Value:7.8e-24 OVERLAP:[CCR4 complex] <510.190.110> SIZE:13                                                                                                                                                                                                                                                                                                                                                                                                                  |
| YBR082C        | [UBC4] Ubiquitin-conjugating enzyme that mediates degradation of short-lived and abnormal proteins; interacts with E3-CaM in ubiquitinating calmodulin; interacts with many SCF ubiquitin protein ligases; component of the cellular stress response ubiquitin conjugating enzyme e2 Overexpression confers resistance to methylmercury. The ubc4ubc5 double mutant is temperature sensitive, reduces turnover of short-lived proteins and canavanyl-peptides but not of long-lived proteins.            |
| YDR059C        | [UBC5] Ubiquitin-conjugating enzyme that mediates selective degradation of short-lived and abnormal proteins, central component of the cellular stress response; expression is heat inducible ubiquitin-conjugating enzyme viable, ubc4/ubc5 double mutant is temperature sensitive                                                                                                                                                                                                                      |
| YGR134W        | [CAF130] Part of the evolutionarily-conserved CCR4-NOT transcriptional regulatory complex involved in controlling mRNA initiation, elongation, and degradation                                                                                                                                                                                                                                                                                                                                           |
| <b>YIL038C</b> | [NOT3] Subunit of the CCR4-NOT complex, which is a global transcriptional regulator with roles in transcription initiation and elongation and in mRNA degradation CCR4 transcriptional complex component Null mutant is viable, overexpression of NOT3 suppresses cdc39(not1) and cdc36(not2) mutations                                                                                                                                                                                                  |
| YPL037C        | [EGD1] Subunit beta1 of the nascent polypeptide-associated complex (NAC) involved in protein targeting, associated with cytoplasmic ribosomes; enhances DNA binding of the Gal4p activator; homolog of human BTF3b pol II transcribed genes regulator                                                                                                                                                                                                                                                    |
| <b>YNR052C</b> | [POP2] RNase of the DEDD superfamily, subunit of the Ccr4-Not complex that mediates 3' to 5' mRNA deadenylation transcription factor (putative) Mutant is resistant to glucose derepression, temperature-sensitive, and unable to sporulate and contains reduced amounts of reserve carbohydrates                                                                                                                                                                                                        |
| <b>YAL021C</b> | [CCR4] Component of the CCR4-NOT transcriptional complex, which is involved in regulation of gene expression; component of the major cytoplasmic deadenylase, which is involved in mRNA poly(A) tail shortening reduced levels of ADH2 expression under both glucose and ethanol growth conditions; temperature sensitive growth on nonfermentative medium                                                                                                                                               |
| <b>YPR072W</b> | [NOT5] Subunit of the CCR4-NOT complex, which is a global transcriptional regulator with roles in transcription initiation and elongation and in mRNA degradation NOT complex member, a global negative regulator of transcription Null mutant is viable, mutations in not4(not2) are synthetically lethal with mutations in not5, overexpression of NOT3 or NOT4(MOT2) suppresses not5 mutations                                                                                                        |

|         |                                                                                                                                                                                                                                                                                                                                                                                                                                                                                 |
|---------|---------------------------------------------------------------------------------------------------------------------------------------------------------------------------------------------------------------------------------------------------------------------------------------------------------------------------------------------------------------------------------------------------------------------------------------------------------------------------------|
| YCR093W | [CDC39] Component of the CCR4-NOT complex, which has multiple roles in regulating mRNA levels including regulation of transcription and destabilizing mRNAs by deadenylation; basal transcription factor transcriptional regulator Null mutant is inviable; arrests in G(sub)1 at pachytene at the mononucleate stage with duplicated, unseparated spindle pole bodies and no spindles; temperature sensitive mutation which causes increased basal transcription of many genes |
| YDL165W | [CDC36] Component of the CCR4-NOT complex, which has multiple roles in regulating mRNA levels including regulation of transcription and destabilizing mRNAs by deadenylation; basal transcription factor transcriptional regulator Null mutant is viable, cdc36 mutant arrests in G(sub)1; forms shmoo morphology at restrictive temperature, arrests at pachytene at the mononucleate stage with duplicated spindle pole bodies and no spindles                                |
| YER068W | [MOT2] Component of the CCR4-NOT transcription regulatory complex, which represses transcription, at least in part, by inhibiting functional TBP-DNA interactions and also aids in transcription elongation; interacts with C-terminal region of Not1p zinc finger protein (putative) Null mutant is viable, exhibits a modest increase in basal transcription of several pheromone-responsive genes; exhibits a conditional cell lysis phenotype                               |
| YNL288W | [CAF40] Evolutionarily conserved subunit of the CCR4-NOT complex involved in controlling mRNA initiation, elongation and degradation; binds Cdc39p                                                                                                                                                                                                                                                                                                                              |
| 0647    | GO_TERM:[hydrolase activity, acting on ester bonds] P-Value:1.3e-02 OVERLAP:[mitochondrial 3'-to-5' exoribonuclease (mtEXO)] <440.40.10> SIZE:2                                                                                                                                                                                                                                                                                                                                 |
| YMR287C | [DSS1] RNase, component of the mitochondrial degradosome along with the ATP-dependent RNA helicase Suv3p; the degradosome associates with the ribosome and mediates turnover of aberrant or unprocessed RNAs 3'-5' exonuclease complex component                                                                                                                                                                                                                                |
| YJL087C | [TRL1] tRNA ligase, required for tRNA splicing; composed of three essential domains containing the phosphodiesterase, polynucleotide kinase, and ligase activities required for ligation; localized at the inner membrane of the nuclear envelope tRNA ligase                                                                                                                                                                                                                   |
| YKL108W | [SLD2] Protein required for DNA replication, phosphorylated in S phase by S-phase cyclin-dependent kinases (Cdk), phosphorylation is essential for DNA replication and for complex formation with Dpb11p; potential Cdc28p substrate Null mutant is inviable; conditional mutant is defective in DNA replication and DNA replication checkpoint                                                                                                                                 |
| 0648    | GO_TERM:[nucleolus] P-Value:3.2e-02                                                                                                                                                                                                                                                                                                                                                                                                                                             |
| YNR004W |                                                                                                                                                                                                                                                                                                                                                                                                                                                                                 |
| YPL157W | [TGS1] Trimethyl guanosine synthase, conserved nucleolar methyl transferase responsible for conversion of the m(7)G cap structure of snRNAs and snoRNAs to m(2,2,7)G; also required for ribosome synthesis and nucleolar morphology                                                                                                                                                                                                                                             |
| 0649    | GO_TERM:[mitotic spindle checkpoint] P-Value:1.9e-12                                                                                                                                                                                                                                                                                                                                                                                                                            |
| YJL013C | [MAD3] Component of the spindle-assembly checkpoint complex, which delays the onset of anaphase in cells with defects in mitotic spindle assembly; interacts physically with the spindle checkpoint proteins Bub3p and Mad2p spindle checkpoint complex subunit Null mutant is viable, benomyl/nocodazole sensitive                                                                                                                                                             |
| YJL030W | [MAD2] Component of the spindle-assembly checkpoint complex, which delays the onset of anaphase in cells with defects in mitotic spindle assembly; forms a complex with Mad1p spindle checkpoint complex subunit                                                                                                                                                                                                                                                                |
| YGR188C | [BUB1] Protein kinase that forms a complex with Mad1p and Bub3p that is crucial in the checkpoint mechanism required to prevent cell cycle progression into anaphase in the presence of spindle damage, associates with centromere DNA via Skp1p Mutants are unable to recover from transient loss of spindle function. Overexpression of BUB1 rescues the cold sensitivity of tub1-729.                                                                                        |
| YGL086W | [MAD1] Coiled-coil protein involved in the spindle-assembly checkpoint; phosphorylated by Mps1p upon checkpoint activation which leads to inhibition of the activity of the anaphase promoting complex; forms a complex with Mad2p                                                                                                                                                                                                                                              |
| YOR026W | [BUB3] Kinetochore checkpoint WD40 repeat protein that localizes to kinetochores during prophase and metaphase, delays anaphase in the presence of unattached kinetochores; forms complexes with Mad1p-Bub1p and with Cdc20p, binds Mad2p and Mad3p                                                                                                                                                                                                                             |
| 0650    | GO_TERM:[catalytic activity] P-Value:7.3e-02                                                                                                                                                                                                                                                                                                                                                                                                                                    |
| YBR058C | [UBP14] Ubiquitin-specific protease that specifically disassembles unanchored ubiquitin chains; involved in fructose-1,6-bisphosphatase (Fbp1p) degradation; similar to human isopeptidase T ubiquitin-specific protease Null mutant is viable but show accumulation of free ubiquitin chains, which correlates with defects in ubiquitin-dependent proteolysis; overexpression of mutant or wild-type Ubp14p can inhibit protein degradation too                               |
| YKR049C | [FMP46] Mitochondrial protein of unknown function; putative redox protein containing a thioredoxin fold                                                                                                                                                                                                                                                                                                                                                                         |
| 0651    | GO_TERM:[binding] P-Value:2.8e-02                                                                                                                                                                                                                                                                                                                                                                                                                                               |
| YDR515W | [SLF1] RNA binding protein that associates with polysomes; proposed to be involved in regulating mRNA translation; involved in the copper-dependent mineralization of copper sulfide complexes on cell surface in cells cultured in copper salts                                                                                                                                                                                                                                |
| YPR188C | [MLC2] Regulatory light chain for the type II myosin, Myo1p; binds to an IQ motif of Myo1p, localization to the bud neck depends on Myo1p; involved in the disassembly of the Myo1p ring light chain for Myo1p                                                                                                                                                                                                                                                                  |

---

|         |                                                                                                                                                                                                           |
|---------|-----------------------------------------------------------------------------------------------------------------------------------------------------------------------------------------------------------|
| 0652    | GO_TERM:[catalytic activity] P-Value:7.3e-02                                                                                                                                                              |
| YJL100W | [LSB6] Phosphatidylinositol 4-kinase that binds Las17p, which is a homolog of human Wiskott-Aldrich Syndrome protein involved in actin patch assembly and actin polymerization                            |
| YPL040C | [ISM1] Mitochondrial isoleucyl-tRNA synthetase, null mutant is deficient in respiratory growth isoleucine-tRNA ligase Null mutant is viable but is petite with defects in mitochondrial protein synthesis |

---

0653

|         |                                                                                                                                                                                                                                  |
|---------|----------------------------------------------------------------------------------------------------------------------------------------------------------------------------------------------------------------------------------|
| YBR286W | [APE3] Vacuolar aminopeptidase Y, processed to mature form by Prb1p aminopeptidase yscIII Null mutant is viable but exhibited reduced vacuolar aminopeptidase activities and could not hydrolyze Lys-Ala-MCA to Lys and Ala-MCA. |
| YPL200W | [CSM4] Protein required for accurate chromosome segregation during meiosis Null: missegregates chromosomes in meiosis                                                                                                            |

---

0654 GO\_TERM:[intracellular mRNA localization] P-Value:3.8e-04

YCL033C

|         |                                                                                                                                                                                                                                    |
|---------|------------------------------------------------------------------------------------------------------------------------------------------------------------------------------------------------------------------------------------|
| YKL130C | [SHE2] RNA-binding protein that binds specific mRNAs and interacts with She3p; part of the mRNA localization machinery that restricts accumulation of certain proteins to the bud                                                  |
| YLR092W | [SUL2] High affinity sulfate permease; sulfate uptake is mediated by specific sulfate transporters Sul1p and Sul2p, which control the concentration of endogenous activated sulfate intermediates high affinity sulfate permease   |
| YBR130C | [SHE3] Protein that acts as an adaptor between Myo4p and the She2p-mRNA complex; part of the mRNA localization machinery that restricts accumulation of certain proteins to the bud; also required for cortical ER inheritance     |
| YJL071W | [ARG2] Acetylglutamate synthase (glutamate N-acetyltransferase), mitochondrial enzyme that catalyzes the first step in the biosynthesis of the arginine precursor ornithine; forms a complex with Arg5,6p acetylglutamate synthase |

---

0655 GO\_TERM:[microfilament motor activity] P-Value:4.0e-10 OVERLAP:[Actin-associated motorproteins] <140.20.30> SIZE:7

|                |                                                                                                                                                                                                                                                                                                                                                                                                                                                                                                                                                    |
|----------------|----------------------------------------------------------------------------------------------------------------------------------------------------------------------------------------------------------------------------------------------------------------------------------------------------------------------------------------------------------------------------------------------------------------------------------------------------------------------------------------------------------------------------------------------------|
| YLR304C        | [ACO1] Aconitase, required for the tricarboxylic acid (TCA) cycle and also independently required for mitochondrial genome maintenance; component of the mitochondrial nucleoid; mutation leads to glutamate auxotrophy aconitase                                                                                                                                                                                                                                                                                                                  |
| YLR356W        |                                                                                                                                                                                                                                                                                                                                                                                                                                                                                                                                                    |
| YPL242C        | [IQG1] Essential protein required for determination of budding pattern, promotes localization of axial markers Bud4p and Cdc12p and functionally interacts with Sec3p, localizes to the contractile ring during anaphase, member of the IQGAP family Null mutant is inviable (spores germinate, divide several times and lyse); cells are multinucleate and have defects in cytokinesis, morphology, actin, and tubulin                                                                                                                            |
| YMR071C        | [TVP18] Integral membrane protein localized to late Golgi vesicles along with the v-SNARE Tlg2p integral membrane protein Null: no notable phenotype                                                                                                                                                                                                                                                                                                                                                                                               |
| YKL124W        | [SSH4] Protein whose overexpression confers resistance to the growth inhibitor leflunomide; suppressor of shr3 mutation                                                                                                                                                                                                                                                                                                                                                                                                                            |
| YBR109C        | [CMD1] Calmodulin; Ca <sup>++</sup> binding protein that regulates Ca <sup>++</sup> independent processes (mitosis, bud growth, actin organization, endocytosis, etc.) and Ca <sup>++</sup> dependent processes (stress-activated pathways), targets include Nuf1p, Myo2p and calcineurin calmodulin                                                                                                                                                                                                                                               |
| <b>YOR326W</b> | [MYO2] One of two type V myosins, involved in polarized distribution of mitochondria; required for mitochondrion and vacuole inheritance and nuclear spindle orientation; moves multiple cargo; reversibly phosphorylated in vivo class V myosin Null mutant is inviable. myo2-66 (E511K), a temperature-sensitive allele, accumulates secretory vesicles and exhibits defects in initiation of new buds and delocalized chitin.                                                                                                                   |
| YOR035C        | [SHE4] Protein containing a UCS (UNC-45/CRO1/SHE4) domain, binds to myosin motor domains to regulate myosin function; involved in endocytosis, polarization of the actin cytoskeleton, and asymmetric mRNA localization                                                                                                                                                                                                                                                                                                                            |
| YGL106W        | [MLC1] Essential light chain for myosin Myo2p; may stabilize Myo2p by binding to the neck region; may interact with Myo1p, Iqg1p, and Myo2p to coordinate formation and contraction of the actomyosin ring with targeted membrane deposition myosin Myo2p light chain Null mutant is inviable; MLC1 is haploinsufficient, the haploinsufficiency exhibited by MLC1 is suppressed by reduced copies of MYO2; a diploid strain hemizygous for both MYO2 and MLC1 is viable                                                                           |
| <b>YAL029C</b> | [MYO4] One of two type V myosins; required for mother-specific HO expression, for the bud tip localization of ASH1 and IST2 mRNA; facilitates growth and orientation of ER tubules along with She3p myosin V heavy chain Null mutant is viable, has no detectable phenotype, either alone or in conjunction with mutations in other myosin genes. Overexpression of MYO4 results in several morphological abnormalities, including the formation of short strings of unseparated cells in diploid strains, or clusters of cells in haploid strains |
| <b>YHR023W</b> | [MYO1] Type II myosin heavy chain, required for wild-type cytokinesis and cell separation; localizes to the actomyosin ring; binds to myosin light chains Mlc1p and Mlc2p through its IQ1 and IQ2 motifs respectively class II myosin Null mutant is viable, exhibits abnormal chitin distribution and cell wall organization at the mother-bud neck in a high proportion of dividing cells; exhibits aberrant nuclear migration and cytokinesis; bem2 myo1 double mutants are inviable                                                            |

---

0656 GO\_TERM:[biological\_process] P-Value:2.3e-01

YPL247C

YAR062W

---

|                |                                                                                                                                                                                                                                                                                                                                                                                                                                                                                                                                                                                                                                                                                                 |
|----------------|-------------------------------------------------------------------------------------------------------------------------------------------------------------------------------------------------------------------------------------------------------------------------------------------------------------------------------------------------------------------------------------------------------------------------------------------------------------------------------------------------------------------------------------------------------------------------------------------------------------------------------------------------------------------------------------------------|
| YMR108W        | [ILV2] Acetolactate synthase, catalyses the first common step in isoleucine and valine biosynthesis and is the target of several classes of inhibitors, localizes to the mitochondria; expression of the gene is under general amino acid control acetolactate synthase Isoleucine-plus-valine requiring; Sulfometuron methyl resistance                                                                                                                                                                                                                                                                                                                                                        |
| 0657           | GO_TERM:[catalytic activity] P-Value:1.8e-01                                                                                                                                                                                                                                                                                                                                                                                                                                                                                                                                                                                                                                                    |
| YOL059W        | [GPD2] NAD-dependent glycerol 3-phosphate dehydrogenase, homolog of Gpd1p, expression is controlled by an oxygen-independent signaling pathway required to regulate metabolism under anoxic conditions; located in cytosol and mitochondria glycerol-3-phosphate dehydrogenase (NAD+)                                                                                                                                                                                                                                                                                                                                                                                                           |
| YDR070C        | [YDR070C] The authentic, non-tagged protein was localized to the mitochondria                                                                                                                                                                                                                                                                                                                                                                                                                                                                                                                                                                                                                   |
| YFL017C        | [GNA1] Evolutionarily conserved glucosamine-6-phosphate acetyltransferase required for multiple cell cycle events including passage through START, DNA synthesis, and mitosis; involved in UDP-N-acetylglucosamine synthesis, forms GlcNAc6P from AcCoA glucosamine-phosphate N-acetyltransferase                                                                                                                                                                                                                                                                                                                                                                                               |
| 0658           | GO_TERM:[response to stress] P-Value:1.4e-02                                                                                                                                                                                                                                                                                                                                                                                                                                                                                                                                                                                                                                                    |
| YFR019W        | [FAB1] 1-phosphatidylinositol-3-phosphate 5-kinase; vacuolar membrane kinase that generates phosphatidylinositol (3,5)P <sub>2</sub> , which is involved in vacuolar sorting and homeostasis 1-phosphatidylinositol-3-phosphate 5-kinase Null mutant is temperature-sensitive. Mutation causes pleiotropic effects on nuclear migration and orientation, and separation of mitotic chromosomes (forms aploid and binucleate cells); has defects in vacuolar function and morphology.                                                                                                                                                                                                            |
| YLR248W        | [RCK2] Protein kinase involved in the response to oxidative and osmotic stress; identified as suppressor of S. pombe cell cycle checkpoint mutations                                                                                                                                                                                                                                                                                                                                                                                                                                                                                                                                            |
| YHR031C        | [RRM3] DNA helicase involved in rDNA replication and Ty1 transposition; structurally and functionally related to Pif1p DNA helicase Null mutant is viable and causes increased Ty1 transposition, rDNA breakage, and accumulation of rDNA circles                                                                                                                                                                                                                                                                                                                                                                                                                                               |
| YKL054C        | [DEF1] RNAPII degradation factor, forms a complex with Rad26p in chromatin, enables ubiquitination and proteolysis of RNAPII present in an elongation complex Rad26-interacting protein Null: slow growth. Other phenotypes: unable to degrade RNAPII in response to UV-damage. def1delta and def1delta rad26delta cells are not UV-sensitive, but def1delta rad16delta and def1delta rad14delta cells are much more sensitive than the rad16delta and rad14delta single mutants. def1delta and to a much larger degree def1delta dst1delta are sensitive to the elongation inhibitor 6-azauracil.                                                                                              |
| 0659           | GO_TERM:[amino acid biosynthesis] P-Value:3.4e-03                                                                                                                                                                                                                                                                                                                                                                                                                                                                                                                                                                                                                                               |
| YDR035W        | [ARO3] 3-deoxy-D-arabino-heptulosonate-7-phosphate (DAHP) synthase, catalyzes the first step in aromatic amino acid biosynthesis and is feedback-inhibited by phenylalanine 3-deoxy-D-arabino-heptulosonate 7-phosphate (DAHP) synthase isoenzyme                                                                                                                                                                                                                                                                                                                                                                                                                                               |
| YLR355C        | [ILV5] Acetohydroxyacid reductoisomerase, mitochondrial protein involved in branched-chain amino acid biosynthesis, also required for maintenance of wild-type mitochondrial DNA acetohydroxyacid reductoisomerase Isoleucine-plus-valine requiring                                                                                                                                                                                                                                                                                                                                                                                                                                             |
| 0660           | GO_TERM:[molecular_function] P-Value:5.5e-01 OVERLAP:[cAMP-dependent protein kinase] <110> SIZE:4                                                                                                                                                                                                                                                                                                                                                                                                                                                                                                                                                                                               |
| YDR281C        | [PHM6] Protein of unknown function, expression is regulated by phosphate levels                                                                                                                                                                                                                                                                                                                                                                                                                                                                                                                                                                                                                 |
| YLR267W        | [YLR267W] Protein of unknown function, overproduction suppresses a pam1 slv3 double null mutation Null: Multicopy suppressor of a pam1 slv3 double deletion mutant                                                                                                                                                                                                                                                                                                                                                                                                                                                                                                                              |
| YAL062W        | [GDH3] NADP(+)-dependent glutamate dehydrogenase, synthesizes glutamate from ammonia and alpha-ketoglutarate; rate of alpha-ketoglutarate utilization differs from Gdh1p; expression regulated by nitrogen and carbon sources NADP-linked glutamate dehydrogenase                                                                                                                                                                                                                                                                                                                                                                                                                               |
| <b>YIL033C</b> | [BCY1] Regulatory subunit of the cyclic AMP-dependent protein kinase (PKA), a component of a signaling pathway that controls a variety of cellular processes, including metabolism, cell cycle, stress response, stationary phase, and sporulation cAMP-dependent protein kinase regulatory subunit Null mutant is viable; sra1 mutants are associated with reduction of glycogen accumulation, temperature sensitivity, reduced growth rate on maltose and sucrose, inability to grow on galactose and nonfermentable carbon sources and nitrogen starvation intolerance. Cells lacking Sra1p are constitutive for cAPK activity resulting in meiotic arrest prior to premeiotic DNA synthesis |
| 0661           | GO_TERM:[double-strand break repair via single-strand annealing, removal of nonhomologous ends] P-Value:9.7e-06 OVERLAP:[NEF1 complex] <510.180.10.10> SIZE:3                                                                                                                                                                                                                                                                                                                                                                                                                                                                                                                                   |
| YHR008C        | [SOD2] Manganese-containing superoxide dismutase; protects cells against oxygen toxicity Mn-containing superoxide dismutase Null mutant is viable; growth is impaired by oxygen; SOD2 is required for sporulation                                                                                                                                                                                                                                                                                                                                                                                                                                                                               |
| YDL022W        | [GPD1] NAD-dependent glycerol-3-phosphate dehydrogenase, key enzyme of glycerol synthesis, essential for growth under osmotic stress; expression regulated by high-osmolarity glycerol response pathway; homolog of Gpd2p glycerol-3-phosphate dehydrogenase                                                                                                                                                                                                                                                                                                                                                                                                                                    |
| <b>YML095C</b> | [RAD10] Single-stranded DNA endonuclease (with Rad1p), cleaves single-stranded DNA during nucleotide excision repair and double-strand break repair; subunit of Nucleotide Excision Repair Factor 1 (NEF1); homolog of human ERCC1 protein ssDNA endonuclease radiation sensitive Deletion of this nucleotide excision repair (NER) gene results in lower levels of cross-link-induced recombination but higher mutation frequencies than wild-type cells.                                                                                                                                                                                                                                      |
| <b>YPL022W</b> | [RAD1] Single-stranded DNA endonuclease (with Rad10p), cleaves single-stranded DNA during nucleotide excision repair and double-strand break repair; subunit of Nucleotide Excision Repair Factor 1 (NEF1); homolog of human XPF protein UV endonuclease radiation sensitive Deletion of this nucleotide excision repair (NER) gene results in lower levels of cross-link-induced recombination but higher mutation frequencies than wild-type cells.                                                                                                                                                                                                                                           |

|                |                                                                                                                                                                                                                                                                                                                                                                                                                                                                                                                                                          |
|----------------|----------------------------------------------------------------------------------------------------------------------------------------------------------------------------------------------------------------------------------------------------------------------------------------------------------------------------------------------------------------------------------------------------------------------------------------------------------------------------------------------------------------------------------------------------------|
| 0662           | GO_TERM:[dolichyl-phosphate-mannose-protein mannosyltransferase activity] P-Value:1.5e-05                                                                                                                                                                                                                                                                                                                                                                                                                                                                |
| YAL023C        | [PMT2] Protein O-mannosyltransferase, transfers mannose residues from dolichyl phosphate-D-mannose to protein serine/threonine residues; acts in a complex with Pmt1p, can instead interact with Pmt5p in some conditions; target for new antifungals dolichyl phosphate-D-mannose:protein O-D-mannosyltransferase Null mutants are viable but show diminished in vitro and in vivo O-mannosylation activity; pmt1 pmt2 double mutant shows severe growth defect but has residual O-mannosylation activity; pmt2 pmt3 pmt4 triple mutant is inviable     |
| YCR043C        |                                                                                                                                                                                                                                                                                                                                                                                                                                                                                                                                                          |
| YDL095W        | [PMT1] Protein O-mannosyltransferase, transfers mannose residues from dolichyl phosphate-D-mannose to protein serine/threonine residues; acts in a complex with Pmt2p, can instead interact with Pmt3p in some conditions; target for new antifungals dolichyl phosphate-D-mannose:protein O-D-mannosyltransferase Null mutant is viable but shows decrease by 40-50% of in vivo protein O-mannosylation; pmt1 pmt2 double mutant shows severe growth defect but residual O-mannosylation activity; the pmt1 pmt2 pmt3 pmt4 quadruple mutant is inviable |
| 0663           | GO_TERM:[biological_process] P-Value:9.6e-02                                                                                                                                                                                                                                                                                                                                                                                                                                                                                                             |
| YMR031C        |                                                                                                                                                                                                                                                                                                                                                                                                                                                                                                                                                          |
| YMR086W        |                                                                                                                                                                                                                                                                                                                                                                                                                                                                                                                                                          |
| 0664           | GO_TERM:[eisosome] P-Value:6.5e-06                                                                                                                                                                                                                                                                                                                                                                                                                                                                                                                       |
| YKL142W        | [MRP8] Putative mitochondrial ribosomal protein, has similarity to E. coli ribosomal protein S2 ribosomal protein                                                                                                                                                                                                                                                                                                                                                                                                                                        |
| YLR179C        |                                                                                                                                                                                                                                                                                                                                                                                                                                                                                                                                                          |
| YGR086C        | [PIL1] Integral membrane protein that along with Lsp1p is a primary component of eisosomes, large immobile patch structures at the cell cortex associated with endocytosis; null mutants show activation of Pkc1p/Ypk1p stress resistance pathways                                                                                                                                                                                                                                                                                                       |
| YPL004C        | [LSP1] Integral membrane protein that along with Pil1p is a primary component of eisosomes, large immobile patch structures at the cell cortex associated with endocytosis; null mutants show activation of Pkc1p/Ypk1p stress resistance pathways                                                                                                                                                                                                                                                                                                       |
| 0665           | GO_TERM:[actin cortical patch] P-Value:1.1e-08 OVERLAP:[Actin-associated proteins] <140.20.20> SIZE:25                                                                                                                                                                                                                                                                                                                                                                                                                                                   |
| YNL106C        | [INP52] Phosphatidylinositol 4,5-bisphosphate 5-phosphatase, synaptojanin-like protein with an N-terminal Sac1 domain, plays a role in endocytosis; hyperosmotic stress causes translocation to actin patches inositol polyphosphate 5-phosphatase Null mutant is viable, has abnormal vacuoles                                                                                                                                                                                                                                                          |
| YPR171W        | [BSP1] Adapter that links synaptojanins Inp2p and Inp53p to the cortical actin cytoskeleton                                                                                                                                                                                                                                                                                                                                                                                                                                                              |
| YCR008W        | [SAT4] Ser/Thr protein kinase involved in salt tolerance; functions in regulation of Trk1p-Trk2p potassium transporter; partially redundant with Hal5p; has similarity to Npr1p                                                                                                                                                                                                                                                                                                                                                                          |
| YLR218C        |                                                                                                                                                                                                                                                                                                                                                                                                                                                                                                                                                          |
| YAL027W        |                                                                                                                                                                                                                                                                                                                                                                                                                                                                                                                                                          |
| YLR144C        | [ACF2] Intracellular beta-1,3-endoglucanase, expression is induced during sporulation; may have a role in cortical actin cytoskeleton assembly Null mutant shows defect in in vitro actin assembly in the permeabilized cell assay                                                                                                                                                                                                                                                                                                                       |
| <b>YLR429W</b> | [CRN1] Coronin, cortical actin cytoskeletal component that associates with the Arp2p/Arp3p complex to regulate its activity Dictyostelium and human actin-binding protein coronin homolog Overexpression of CRN1 causes growth arrest and redistribution of Arp2p and Crn1p into aberrant actin loops.                                                                                                                                                                                                                                                   |
| YCR009C        | [RVS161] Amphiphysin-like lipid raft protein; subunit of a complex (Rvs161p-Rvs167p) that regulates polarization of the actin cytoskeleton, endocytosis, cell polarity, cell fusion and viability following starvation or osmotic stress Null mutant is viable, rvs161 mutations result in a delocalization of the actin cytoskeleton, high salt sensitivity, random budding pattern in diploid cells, defects in endocytosis, and reduced viability upon starvation; rvs161 mutants exhibit synthetic lethality with sst2 mutants                       |
| <b>YDR388W</b> | [RVS167] Actin-associated protein, subunit of a complex (Rvs161p-Rvs167p) involved in regulation of actin cytoskeleton, endocytosis, and viability following starvation or osmotic stress; homolog of mammalian amphiphysin cytoskeletal protein (putative) Null mutant is viable but exhibits reduced viability upon starvation                                                                                                                                                                                                                         |
| 0666           | GO_TERM:[nucleotide-excision repair, DNA damage recognition] P-Value:1.2e-13 OVERLAP:[NEF4 complex] <510.180.10.40> SIZE:2                                                                                                                                                                                                                                                                                                                                                                                                                               |
| YKL159C        | [RCN1] Protein involved in calcineurin regulation during calcium signaling; has similarity to H. sapiens DSCR1 which is found in the Down Syndrome candidate region calcineurin inhibitor                                                                                                                                                                                                                                                                                                                                                                |
| YHR144C        | [DCD1] Deoxycytidine monophosphate (dCMP) deaminase required for dCTP and dTTP synthesis; expression is NOT cell cycle regulated dCMP deaminase Null mutant is viable, resistant to 5-fluoro-2'-deoxycytidylate                                                                                                                                                                                                                                                                                                                                          |
| YIL011W        | [TIR3] Cell wall mannoprotein of the Srp1p/Tip1p family of serine-alanine-rich proteins; expressed under anaerobic conditions and required for anaerobic growth cell wall mannoprotein inviable under anaerobic conditions                                                                                                                                                                                                                                                                                                                               |

|                |                                                                                                                                                                                                                                                                                                                                                                                                                                                                                                                          |
|----------------|--------------------------------------------------------------------------------------------------------------------------------------------------------------------------------------------------------------------------------------------------------------------------------------------------------------------------------------------------------------------------------------------------------------------------------------------------------------------------------------------------------------------------|
| YER162C        | [RAD4] Protein that recognizes and binds damaged DNA (with Rad23p) during nucleotide excision repair; subunit of Nuclear Excision Repair Factor 2 (NEF2); homolog of human XPC protein Null mutant is viable and radiation sensitive Deletion of this nucleotide excision repair (NER) gene results in lower levels of cross-link-induced recombination but higher mutation frequencies than wild-type cells.                                                                                                            |
| YMR201C        | [RAD14] Protein that recognizes and binds damaged DNA during nucleotide excision repair; subunit of Nucleotide Excision Repair Factor 1 (NEF1); contains zinc finger motif; homolog of human XPA protein human xeroderma pigmentosum group A DNA repair gene homolog Null mutant is viable and radiation sensitive                                                                                                                                                                                                       |
| <b>YBR114W</b> | [RAD16] Protein that recognizes and binds damaged DNA in an ATP-dependent manner (with Rad7p) during nucleotide excision repair; subunit of Nucleotide Excision Repair Factor 4 (NEF4); member of the SWI/SNF family radiation sensitive                                                                                                                                                                                                                                                                                 |
| <b>YJR052W</b> | [RAD7] Protein that recognizes and binds damaged DNA in an ATP-dependent manner (with Rad16p) during nucleotide excision repair; subunit of Nucleotide Excision Repair Factor 4 (NEF4) nucleotide excision NEF4 component radiation sensitive                                                                                                                                                                                                                                                                            |
| YPL046C        | [ELC1] Elongin C, forms heterodimer with Ela1p that participates in transcription elongation; expression dramatically upregulated during sporulation; widely conserved among eukaryotes elongin C transcription elongation factor The deletion mutant is not sensitive to UV damage, however the elc1 rad23 double mutant is more UV sensitive than the rad23 mutant alone.                                                                                                                                              |
| 0667           | GO_TERM:[chaperonin-containing T-complex] P-Value:9.0e-13 OVERLAP:[Chaperonine containing T-complex TRiC (TCP RING Complex)] <130> SIZE:8                                                                                                                                                                                                                                                                                                                                                                                |
| <b>YDR212W</b> | [TCP1] Alpha subunit of chaperonin-containing T-complex, which mediates protein folding in the cytosol; involved in maintenance of actin cytoskeleton; homolog to Drosophila melanogaster and mouse tailless complex polypeptide chaperonin subunit alpha                                                                                                                                                                                                                                                                |
| <b>YIL142W</b> | [CCT2] Subunit beta of the cytosolic chaperonin Cct ring complex, related to Tcp1p, required for the assembly of actin and tubulins in vivo                                                                                                                                                                                                                                                                                                                                                                              |
| YNL212W        | [VID27] Cytoplasmic protein of unknown function; possibly involved in vacuolar protein degradation; not essential for proteasome-dependent degradation of fructose-1,6-bisphosphatase (FBPase); null mutants exhibit normal growth Null mutant is viable but exhibits vacuole degradation of cytosolic proteins                                                                                                                                                                                                          |
| <b>YDR188W</b> | [CCT6] Subunit of the cytosolic chaperonin Cct ring complex, related to Tcp1p, essential protein that is required for the assembly of actin and tubulins in vivo; contains an ATP-binding motif                                                                                                                                                                                                                                                                                                                          |
| <b>YDL143W</b> | [CCT4] Subunit of the cytosolic chaperonin Cct ring complex, related to Tcp1p, required for the assembly of actin and tubulins in vivo                                                                                                                                                                                                                                                                                                                                                                                   |
| <b>YJL111W</b> | [CCT7] Subunit of the cytosolic chaperonin Cct ring complex, related to Tcp1p, required for the assembly of actin and tubulins in vivo chaperonin containing T-complex subunit seven component                                                                                                                                                                                                                                                                                                                           |
| YOR281C        | [PLP2] Essential protein with similarity to phosducins, which are GTPase inhibitors; lethality of null mutation is functionally complemented by expression of mouse phosducin-like protein MgcPhLP                                                                                                                                                                                                                                                                                                                       |
| 0668           | GO_TERM:[localization] P-Value:2.5e-01                                                                                                                                                                                                                                                                                                                                                                                                                                                                                   |
| YGL014W        | [PUF4] Member of the PUF protein family, which is defined by the presence of Pumilio homology domains that confer RNA binding activity; preferentially binds mRNAs encoding nucleolar ribosomal RNA-processing factors                                                                                                                                                                                                                                                                                                   |
| YNL231C        | [PDR16] Phosphatidylinositol transfer protein (PITP) controlled by the multiple drug resistance regulator Pdr1p, localizes to lipid particles and microsomes, controls levels of various lipids, may regulate lipid synthesis, homologous to Pdr17p Pdr17p homolog Sec14p homolog Null mutant is viable, exhibits hypersensitivity to azole inhibitors of ergosterol biosynthesis, alterations in sterol composition of the plasma membrane; pdr16 pdr17 double deletion mutants exhibit additive exacerbated phenotypes |
| YDL053C        | [PBP4] Pbp1p binding protein, interacts strongly with Pab1p-binding protein 1 (Pbp1p) in the yeast two-hybrid system; also interacts with Lsm12p in a copurification assay                                                                                                                                                                                                                                                                                                                                               |
| YGL203C        | [KEX1] Protease involved in the processing of killer toxin and alpha factor precursor; cleaves Lys and Arg residues from the C-terminus of peptides and proteins protease similar to carboxypeptidase B Null mutant is viable and defective in killer expression                                                                                                                                                                                                                                                         |
| YPR067W        | [ISA2] Protein required for maturation of mitochondrial and cytosolic Fe/S proteins, localizes to the mitochondrial intermembrane space, overexpression of ISA2 suppresses grx5 mutations null mutant is viable; exhibits dependency on lysine and glutamate for growth, an increase in mitochondrial iron concentration, and a respiratory deficiency due to accumulation of mutations in mitochondrial DNA                                                                                                             |
| 0669           | GO_TERM:[negative regulation of transcription, DNA-dependent] P-Value:6.5e-02                                                                                                                                                                                                                                                                                                                                                                                                                                            |
| YDL173W        |                                                                                                                                                                                                                                                                                                                                                                                                                                                                                                                          |
| YLR382C        | [NAM2] Mitochondrial leucyl-tRNA synthetase, also has a direct role in splicing of several mitochondrial group I introns; indirectly required for mitochondrial genome maintenance LeuRS leucine-tRNA ligase Null mutant is viable, respiration deficient                                                                                                                                                                                                                                                                |
| YBR275C        | [RIF1] Protein that binds to the Rap1p C-terminus and acts synergistically with Rif2p to help control telomere length and establish telomeric silencing; deletion results in telomere elongation RAPI-interacting factor defective in telomeric silencing and telomere length regulation                                                                                                                                                                                                                                 |
| YKL005C        | [BYE1] Negative regulator of transcription elongation, contains a TFIIIS-like domain and a PHD finger, multicopy suppressor of temperature-sensitive ess1 mutations, probably binds RNA polymerase II large subunit Negative regulator of transcription elongation Null: viable, 6-AU resistant                                                                                                                                                                                                                          |
| 0670           | GO_TERM:[heterochromatin] P-Value:2.0e-07                                                                                                                                                                                                                                                                                                                                                                                                                                                                                |

|         |                                                                                                                                                                                                                                                                                                                                                                                                                                      |
|---------|--------------------------------------------------------------------------------------------------------------------------------------------------------------------------------------------------------------------------------------------------------------------------------------------------------------------------------------------------------------------------------------------------------------------------------------|
| YDR227W | [SIR4] Silent information regulator that, together with SIR2 and SIR3, is involved in assembly of silent chromatin domains at telomeres and the silent mating-type loci; potentially phosphorylated by Cdc28p; some alleles of SIR4 prolong lifespan silencing regulator at HML, HMR, and telomeres                                                                                                                                  |
| YLR278C |                                                                                                                                                                                                                                                                                                                                                                                                                                      |
| YLR442C | [SIR3] Silencing protein that interacts with Sir2p and Sir4p, and histone H3 and H4 tails, to establish a transcriptionally silent chromatin state; required for spreading of silenced chromatin; recruited to chromatin through interaction with Rap1p silencing regulator at HML, HMR, and telomeres sterile                                                                                                                       |
| YKR101W | [SIR1] Protein involved in repression of transcription at the silent mating-type loci HML and HMR; recruitment to silent chromatin requires interactions with Orc1p and with Sir4p, through a common Sir1p domain; binds to centromeric chromatin silent mating loci repressor                                                                                                                                                       |
| YNL216W | [RAP1] DNA-binding protein involved in either activation or repression of transcription, depending on binding site context; also binds telomere sequences and plays a role in telomeric position effect (silencing) and telomere structure repressor activator protein null is inviable; some mutations abolish silencing (at telomeres and at the silent mating-type loci), other mutations or overproduction alter telomere length |
| 0671    | GO_TERM:[NAD-independent histone deacetylase activity] P-Value:9.8e-17                                                                                                                                                                                                                                                                                                                                                               |
| YIL055C |                                                                                                                                                                                                                                                                                                                                                                                                                                      |
| YPL115C | [BEM3] Rho GTPase activating protein (RhoGAP) involved in control of the cytoskeleton organization; targets the essential Rho-GTPase Cdc42p, which controls establishment and maintenance of cell polarity, including bud-site assembly rho GTPase activating protein (GAP)                                                                                                                                                          |
| YER115C | [SPR6] Protein of unknown function, expressed during sporulation; not required for sporulation, but gene exhibits genetic interactions with other genes required for sporulation Null mutant is viable, shows no sporulation defects                                                                                                                                                                                                 |
| YHR149C | [SKG6] Protein of unknown function; found in the bud tip and bud neck, potential Cdc28p substrate; Skg6p interacts with Zds1p and Zds2p                                                                                                                                                                                                                                                                                              |
| YML109W | [ZDS2] Protein that interacts with silencing proteins at the telomere, involved in transcriptional silencing; paralog of Zds1p Null mutant is viable; zds1 zds2 double deletion causes slow growth and defects in bud morphology and cell cycle progression                                                                                                                                                                          |
| YDR155C | [CPR1] Cytoplasmic peptidyl-prolyl cis-trans isomerase (cyclophilin), catalyzes the cis-trans isomerization of peptide bonds N-terminal to proline residues; binds the drug cyclosporin A cyclophilin peptidyl-prolyl cis-trans isomerase (PPIase)                                                                                                                                                                                   |
| YMR273C | [ZDS1] Protein that interacts with silencing proteins at the telomere, involved in transcriptional silencing; has a role in localization of Bcy1p, a regulatory subunit of protein kinase A; implicated in mRNA nuclear export High-copy suppressor of ceg-ts mutations                                                                                                                                                              |
| YBR103W | [SIF2] WD40 repeat-containing subunit of the Set3C histone deacetylase complex, which represses early/middle sporulation genes; antagonizes telomeric silencing; binds specifically to the Sir4p N-terminus Null mutant is viable, exhibits increased telomeric silencing                                                                                                                                                            |
| YOL068C | [HST1] NAD(+)-dependent histone deacetylase; essential subunit of the Sum1p/Rfm1p/Hst1p complex required for ORC-dependent silencing and mitotic repression; non-essential subunit of the Set3C deacetylase complex; involved in telomere maintenance Overexpression restores transcriptional silencing in a sir2 mutant                                                                                                             |
| YIL112W | [HOS4] Subunit of the Set3 complex, which is a meiotic-specific repressor of sporulation specific genes that contains deacetylase activity; potential Cdc28p substrate                                                                                                                                                                                                                                                               |
| YKR029C | [SET3] Defining member of the SET3 histone deacetylase complex which is a meiosis-specific repressor of sporulation genes; necessary for efficient transcription by RNAPII; one of two yeast proteins that contains both SET and PHD domains                                                                                                                                                                                         |
| YCR033W | [SNT1] Subunit of the Set3C deacetylase complex; putative DNA-binding protein                                                                                                                                                                                                                                                                                                                                                        |
| YGL194C | [HOS2] Histone deacetylase required for gene activation via specific deacetylation of lysines in H3 and H4 histone tails; subunit of the Set3 complex, a meiotic-specific repressor of sporulation specific genes that contains deacetylase activity                                                                                                                                                                                 |
| 0672    | GO_TERM:[post-chaperonin tubulin folding pathway] P-Value:3.0e-06                                                                                                                                                                                                                                                                                                                                                                    |
| YER007W | [PAC2] Microtubule effector required for tubulin heterodimer formation, binds alpha-tubulin, required for normal microtubule function, null mutant exhibits cold-sensitive microtubules and sensitivity to benomyl tubulin folding cofactor E                                                                                                                                                                                        |
| YOR349W | [CIN1] Tubulin folding factor D involved in beta-tubulin (Tub2p) folding; isolated as mutant with increased chromosome loss and sensitivity to benomyl tubulin folding cofactor D Null mutant is viable, exhibits cold sensitivity for viability; defect in nuclear migration and nuclear fusion, supersensitivity to benomyl and nocodazole                                                                                         |
| 0673    | GO_TERM:[catalytic activity] P-Value:6.3e-02                                                                                                                                                                                                                                                                                                                                                                                         |
| YGR267C | [FOL2] GTP-cyclohydrolase I, catalyzes the first step in the folic acid biosynthetic pathway GTP-cyclohydrolase I Folinic acid requiring                                                                                                                                                                                                                                                                                             |
| YBR169C | [SSE2] Member of the heat shock protein 70 (HSP70) family; may be involved in protein folding; localized to the cytoplasm; highly homologous to the heat shock protein Sse1p HSP70 family SSE1 homolog                                                                                                                                                                                                                               |
| YBL082C | [ALG3] Dolichol-P-Man dependent alpha(1-3) mannosyltransferase, involved in the synthesis of dolichol-linked oligosaccharide donor for N-linked glycosylation of proteins Dol-P-Man dependent alpha(1-3) mannosyltransferase (putative) Null mutant is viable, resistant to Hansenula killer toxin                                                                                                                                   |
| YKL210W | [UBA1] Ubiquitin activating enzyme, involved in ubiquitin-mediated protein degradation and essential for viability ubiquitin activating enzyme e1                                                                                                                                                                                                                                                                                    |

|         |                                                                                                                                                                                                                                                                                                                                                                                                                                                                                                                                                                                                                                                                                                                                  |
|---------|----------------------------------------------------------------------------------------------------------------------------------------------------------------------------------------------------------------------------------------------------------------------------------------------------------------------------------------------------------------------------------------------------------------------------------------------------------------------------------------------------------------------------------------------------------------------------------------------------------------------------------------------------------------------------------------------------------------------------------|
| 0674    | GO_TERM:[molecular_function] P-Value:3.7e-01                                                                                                                                                                                                                                                                                                                                                                                                                                                                                                                                                                                                                                                                                     |
| YHR014W | [SPO13] Meiosis-specific protein, involved in maintaining sister chromatid cohesion during meiosis I as well as promoting proper attachment of kinetochores to the spindle during meiosis I and meiosis II Null mutant is viable, defective for sporulation; loss of function results in a single division during meiosis (with some chromosomes segregating reductionally or aberrantly depending on strain background), occurring slightly earlier or at the time of wild type meiosis I, and dyad asci containing two diploid spores. spo13 rescues the meiotic lethality of early Rec- mutants and Rec+ haploids. Gain of function causes a CDC28-dependent arrest at M-phase in mitosis and a delay in MI nuclear division. |
| YHR185C | [PFS1] Sporulation protein required for prospore membrane formation at selected spindle poles, ensures functionality of all four spindle pole bodies of a cell during meiosis II; not required for meiotic recombination or meiotic chromosome segregation Null mutant is viable; homozygous null diploid accumulates nonsister-spore dyads, normal meiotic spindles                                                                                                                                                                                                                                                                                                                                                             |
| YIL007C | [NAS2] Protein with similarity to the p27 subunit of mammalian proteasome modulator; not essential; interacts with Rpn4p                                                                                                                                                                                                                                                                                                                                                                                                                                                                                                                                                                                                         |
| 0675    | GO_TERM:[protein monoubiquitination] P-Value:4.6e-03                                                                                                                                                                                                                                                                                                                                                                                                                                                                                                                                                                                                                                                                             |
| YMR100W | [MUB1] Protein of unknown function, deletion causes multi-budding phenotype; has similarity to Aspergillus nidulans samB gene Null mutant is viable but shows multi-budding                                                                                                                                                                                                                                                                                                                                                                                                                                                                                                                                                      |
| YGL058W | [RAD6] Ubiquitin-conjugating enzyme (E2), involved in postreplication repair (with Rad18p), sporulation, telomere silencing, and ubiquitin-mediated N-end rule protein degradation (with Ubr1p) ubiquitin-conjugating enzyme Radiation sensitive. Defective for postreplication repair, repression of retrotransposition, meiotic gene conversion and sporulation. Mutations in srs2 suppress rad6 radiation-sensitivity but not the sporulation defect. rad6 forms recombination intermediates. mgs1 is synthetic lethal with rad6. Deletion mutants of this post-replication repair (PRR) gene do not have any cross-link-induced mutations but show increased levels of recombination.                                        |
| YOL080C | [REX4] Putative RNA exonuclease possibly involved in pre-rRNA processing and ribosome assembly                                                                                                                                                                                                                                                                                                                                                                                                                                                                                                                                                                                                                                   |
| YDL020C | [RPN4] Transcription factor that stimulates expression of proteasome genes; Rpn4p levels are in turn regulated by the 26S proteasome in a negative feedback control mechanism; RPN4 is transcriptionally regulated by various stress responses Null mutant is viable, exhibits synthetic interactions with sen3, sun1, and cdc28-1N                                                                                                                                                                                                                                                                                                                                                                                              |
| YDR051C |                                                                                                                                                                                                                                                                                                                                                                                                                                                                                                                                                                                                                                                                                                                                  |
| YLR024C | [UBR2] Cytoplasmic ubiquitin-protein ligase (E3) ubiquitin-protein ligase (E3)                                                                                                                                                                                                                                                                                                                                                                                                                                                                                                                                                                                                                                                   |
| 0676    | GO_TERM:[catalytic activity] P-Value:1.8e-01                                                                                                                                                                                                                                                                                                                                                                                                                                                                                                                                                                                                                                                                                     |
| YGR111W |                                                                                                                                                                                                                                                                                                                                                                                                                                                                                                                                                                                                                                                                                                                                  |
| YCR053W | [THR4] Threonine synthase, conserved protein that catalyzes formation of threonine from 0-phosphohomoserine; expression is regulated by the GCN4-mediated general amino acid control pathway threonine synthase threonine requiring                                                                                                                                                                                                                                                                                                                                                                                                                                                                                              |
| YOL151W | [GRE2] NADPH-dependent methylglyoxal reductase (D-lactaldehyde dehydrogenase); stress induced (osmotic, ionic, oxidative, heat shock and heavy metals); regulated by the HOG pathway                                                                                                                                                                                                                                                                                                                                                                                                                                                                                                                                             |
| 0677    | GO_TERM:[signalosome complex] P-Value:2.0e-18                                                                                                                                                                                                                                                                                                                                                                                                                                                                                                                                                                                                                                                                                    |
| YPR045C |                                                                                                                                                                                                                                                                                                                                                                                                                                                                                                                                                                                                                                                                                                                                  |
| YER137C |                                                                                                                                                                                                                                                                                                                                                                                                                                                                                                                                                                                                                                                                                                                                  |
| YJR084W | [CSN12] Subunit of the Cop9 signalosome, which is required for deneddylation, or removal of the ubiquitin-like protein Rub1p from Cdc53p (cullin); involved in adaptation to pheromone signaling COP9 signalosome (CSN) subunit                                                                                                                                                                                                                                                                                                                                                                                                                                                                                                  |
| YMR025W | [CS11] Subunit of the Cop9 signalosome, which is required for deneddylation, or removal of the ubiquitin-like protein Rub1p from Cdc53p (cullin); involved in adaptation to pheromone signaling Interactor with COP9 signalosome (CSN) complex                                                                                                                                                                                                                                                                                                                                                                                                                                                                                   |
| YIL071C | [PCI8] Possible shared subunit of Cop9 signalosome (CSN) and eIF3, binds eIF3b subunit Prt1p, has possible dual functions in transcriptional and translational control, contains a PCI (Proteasome-COP9 signalosome (CSN)-eIF3) domain COP9 signalosome (CSN) subunit translational regulator (putative)                                                                                                                                                                                                                                                                                                                                                                                                                         |
| YDR179C | [CSN9] Subunit of the Cop9 signalosome, which is required for deneddylation, or removal of the ubiquitin-like protein Rub1p from Cdc53p (cullin); involved in adaptation to pheromone signaling COP9 signalosome (CSN) subunit                                                                                                                                                                                                                                                                                                                                                                                                                                                                                                   |
| YDL216C | [RRI1] Catalytic subunit of the COP9 signalosome (CSN) complex that acts as an isopeptidase in cleaving the ubiquitin-like protein Nedd8 from SCF ubiquitin ligases; metalloendopeptidase involved in the adaptation to pheromone signaling COP9 signalosome (CSN) subunit Null mutant is viable; accumulates cdc53 in rub1 conjugated form                                                                                                                                                                                                                                                                                                                                                                                      |
| YOL117W | [RRI2] Subunit of the COP9 signalosome (CSN) complex that cleaves the ubiquitin-like protein Nedd8 from SCF ubiquitin ligases; plays a role in the mating pheromone response COP9 signalosome (CSN) subunit Null: viable. Other phenotypes: Cdc53 accumulates exclusively in the 'rubinylated' form in an rri2-null                                                                                                                                                                                                                                                                                                                                                                                                              |
| 0678    | GO_TERM:[catalytic activity] P-Value:2.0e-02                                                                                                                                                                                                                                                                                                                                                                                                                                                                                                                                                                                                                                                                                     |
| YBR133C | [HSL7] Protein arginine N-methyltransferase that exhibits septin and Hsl1p-dependent bud neck localization and periodic Hsl1p-dependent phosphorylation; required along with Hsl1p for bud neck recruitment, phosphorylation, and degradation of Swe1p Has homology to arginine methyltransferases Null mutant is viable; synthetically lethal with histone H3 mutations; G2 delay                                                                                                                                                                                                                                                                                                                                               |
| YDL036C | [PUS9] Mitochondrial tRNA pseudouridine synthase involved in pseudouridylation of mitochondrial tRNAs at position 32 tRNA pseudouridine synthase                                                                                                                                                                                                                                                                                                                                                                                                                                                                                                                                                                                 |
| YER087W |                                                                                                                                                                                                                                                                                                                                                                                                                                                                                                                                                                                                                                                                                                                                  |

|                         |                                                                                                                                                                                                                                                                                                                                                                                                                                                                                                                                                                 |
|-------------------------|-----------------------------------------------------------------------------------------------------------------------------------------------------------------------------------------------------------------------------------------------------------------------------------------------------------------------------------------------------------------------------------------------------------------------------------------------------------------------------------------------------------------------------------------------------------------|
| 0679                    | GO_TERM:[EKC/KEOPS protein complex] P-Value:1.0e-12                                                                                                                                                                                                                                                                                                                                                                                                                                                                                                             |
| YGR262C                 | [BUD32] Protein involved in bud-site selection; diploid mutants display a random budding pattern instead of the wild-type bipolar pattern<br>Diploid mutants exhibit random budding                                                                                                                                                                                                                                                                                                                                                                             |
| YJL184W                 | [GON7] Protein of unknown function, proposed to be involved in the transfer of mannosylphosphate groups onto N-linked oligosaccharides; also proposed to be involved in responding to osmotic stress                                                                                                                                                                                                                                                                                                                                                            |
| YKR038C                 | [KAE1] Putative glycoprotease that interacts with Bud32p, which is a member of the novel protein kinase piD261 family Putative O-sialo-glycoprotein-endorpeptidase A1 Null: gene disruption is lethal                                                                                                                                                                                                                                                                                                                                                           |
| YML036W                 | [CGI121] Component of conserved KEOPS protein complex, which promotes telomere uncapping and elongation, and also contains protein kinase Bud32p, putative peptidase Kae1p, and Gon7p; deletion suppresses cdc13-1                                                                                                                                                                                                                                                                                                                                              |
| 0680                    | GO_TERM:[biopolymer catabolism] P-Value:1.0e-03                                                                                                                                                                                                                                                                                                                                                                                                                                                                                                                 |
| YML088W                 | [UFO1] F-box receptor protein, subunit of the Skp1-Cdc53-F-box receptor (SCF) E3 ubiquitin ligase complex; binds to phosphorylated Ho endonuclease, allowing its ubiquitylation by SCF and subsequent degradation F-box protein Null mutant is viable and UV sensitive                                                                                                                                                                                                                                                                                          |
| YDL227C                 | [HO] Site-specific endonuclease required for gene conversion at the MAT locus (homothallic switching) through the generation of a ds DNA break; expression restricted to mother cells in late G1 as controlled by Swi4p-Swi6p, Swi5p and Ash1p homothallic switching endonuclease Null mutant is viable and cannot undergo mating type switching                                                                                                                                                                                                                |
| YER143W                 | [DDI1] DNA damage-inducible v-SNARE binding protein, contains a ubiquitin-associated (UBA) domain, may act as a negative regulator of constitutive exocytosis, may play a role in S-phase checkpoint control                                                                                                                                                                                                                                                                                                                                                    |
| 0681                    | GO_TERM:[translation initiation factor activity] P-Value:7.8e-05 OVERLAP:[eIF5A] <500.10.100> SIZE:2                                                                                                                                                                                                                                                                                                                                                                                                                                                            |
| <a href="#">YEL034W</a> | [HYP2] Translation initiation factor eIF-5A, promotes formation of the first peptide bond; similar to and functionally redundant with Anb1p; undergoes an essential hypusination modification; expressed under aerobic conditions translation initiation factor eIF-5A Null mutant is viable; a double mutant containing disruptions of both HYP2 and the highly homologous ANB1 is inviable                                                                                                                                                                    |
| <a href="#">YJR047C</a> | [ANB1] Translation initiation factor eIF-5A, promotes formation of the first peptide bond; similar to and functionally redundant with Hyp2p; undergoes an essential hypusination modification; expressed under anaerobic conditions translation initiation factor eIF-5A, anaerobically expressed form null mutant is viable; a double mutant containing disruptions of both ANB1 and the highly homologous HYP2 is inviable                                                                                                                                    |
| 0682                    | GO_TERM:[hydrolase activity] P-Value:2.3e-02                                                                                                                                                                                                                                                                                                                                                                                                                                                                                                                    |
| YBR204C                 |                                                                                                                                                                                                                                                                                                                                                                                                                                                                                                                                                                 |
| YPL096W                 | [PNG1] Conserved peptide N-glycanase required for deglycosylation of misfolded glycoproteins during proteasome-dependent degradation, localizes to the cytoplasm and nucleus, interacts with the DNA repair protein Rad23p peptide:N-glycanase Null mutant is viable and shows no growth or viability defect under experimental conditions                                                                                                                                                                                                                      |
| 0683                    | GO_TERM:[protein phosphatase type 2A complex] P-Value:5.7e-13                                                                                                                                                                                                                                                                                                                                                                                                                                                                                                   |
| YPR040W                 | [TIP41] Protein that interacts physically and genetically with Tap42p, which regulates protein phosphatase 2A; component of the TOR (target of rapamycin) signaling pathway Homozygous null mutants did not sporulate, showed resistance to benomyl; homozygous and haploid deletants were sensitive to thiabendazol                                                                                                                                                                                                                                            |
| YIL153W                 | [RRD1] Activator of the phosphotyrosyl phosphatase activity of PP2A; regulates G1 phase progression, the G2/M phase transition, microtubule dynamics, the osmoresponse, bud morphogenesis and DNA repair; subunit of the Tap42p-Sit4p-Rrd1p complex Null mutant shows pleiotropic phenotypes (eg. caffeine and rapamycin resistance, vanadate and calcium sensitivity, etc.); synthetic lethal with RRD2; lethality of rrd1rrd2 suppressed by increased osmolarity and also under oxygen-limited conditions.                                                    |
| YMR028W                 | [TAP42] Essential protein involved in the TOR signaling pathway; physically associates with the protein phosphatase 2A and the SIT4 protein phosphatase catalytic subunits 42 kDa protein that physically associates with the PP2A and SIT4 protein phosphatase catalytic subunits                                                                                                                                                                                                                                                                              |
| YOR162C                 | [YRR1] Zn2-Cys6 zinc-finger transcription factor that activates genes involved in multidrug resistance; paralog of Yrm1p, acting on an overlapping set of target genes transcription factor Null mutant is viable; hypersensitive to calcofluor white; hypersensitive to 4-nitroquinoline oxide (4-NQO); cannot utilize glycerol and lactate as sole carbon source; the YRR1-1 allele confers resistance to 4-NQO, reveromycin-A and oligomycin                                                                                                                 |
| YGR161C                 | [RTS3] Putative component of the protein phosphatase type 2A complex                                                                                                                                                                                                                                                                                                                                                                                                                                                                                            |
| YGL190C                 | [CDC55] Non-essential regulatory subunit B of protein phosphatase 2A; has multiple roles in mitosis and protein biosynthesis; found in the nucleus of most cells but also at the bud neck (large-budded cells) and at the bud tip (small-budded cells) protein phosphatase 2A regulatory subunit B abnormally elongated buds, delay or partial block of septation and/or cell separation; deletion mutant is cold-sensitive                                                                                                                                     |
| YPL152W                 | [RRD2] Activator of the phosphotyrosyl phosphatase activity of PP2A; regulates G1 phase progression, the osmoresponse and microtubule dynamics; implicated in the spindle assembly check; subunit of the Tap42p-Pph21p-Rrd2p complex Null mutant shows rapamycin resistance; synthetic lethal with RRD1; lethality of rrd1rrd2 suppressed by increased osmolarity and also under oxygen-limited conditions.                                                                                                                                                     |
| YOR014W                 | [RTS1] B-type regulatory subunit of protein phosphatase 2A (PP2A); homolog of the mammalian B' subunit of PP2A protein phosphatase 2A (PP2A) B-type regulatory subunit Null mutant is viable but is temperature-sensitive, hypersensitive to ethanol, and unable to grow with glycerol as the sole carbon source                                                                                                                                                                                                                                                |
| YOR073W                 | [SGO1] Component of the spindle checkpoint, involved in sensing lack of tension on mitotic chromosomes; protects centromeric Rec8p at meiosis I; required for accurate chromosomal segregation at meiosis II and for mitotic chromosome stability                                                                                                                                                                                                                                                                                                               |
| YAL016W                 | [TPD3] Regulatory subunit A of the heterotrimeric protein phosphatase 2A, which also contains regulatory subunit Cdc55p and either catalytic subunit Pph21p or Pph22p; required for cell morphogenesis and for transcription by RNA polymerase III protein phosphatase 2A regulatory subunit A Null mutant is viable, defective in cytokinesis at reduced temperatures, defective in transcription by RNA polymerase III at elevated temperatures; nocodazole sensitive and exhibits phenotypes of previously identified kinetochore/spindle checkpoint mutants |

|         |                                                                                                                                                                                                                                                                                                                                                                                                                                                                                                                                                                                            |
|---------|--------------------------------------------------------------------------------------------------------------------------------------------------------------------------------------------------------------------------------------------------------------------------------------------------------------------------------------------------------------------------------------------------------------------------------------------------------------------------------------------------------------------------------------------------------------------------------------------|
| YDL134C | [PPH21] Catalytic subunit of protein phosphatase 2A, functionally redundant with Pph22p; methylated at C terminus; forms alternate complexes with several regulatory subunits; involved in signal transduction and regulation of mitosis Null mutant is viable, pph21 pph22 mutants produce very small spores in some strain backgrounds and are inviable in others, pph21 pph22 pph3 mutants are inviable                                                                                                                                                                                 |
| 0684    | GO_TERM:[protein binding] P-Value:5.8e-02                                                                                                                                                                                                                                                                                                                                                                                                                                                                                                                                                  |
| YLL039C | [UBI4] Ubiquitin, becomes conjugated to proteins, marking them for selective degradation via the ubiquitin-26S proteasome system; essential for the cellular stress response poly-ubiquitin ubiquitin Null mutant is viable, grows at wild-type rates and contains wild-type levels of free ubiquitin under exponential growth conditions, hypersensitive to high temperatures, starvation and amino acid analogs; although ubi4/UBI4 diploids form initially viable spores, the two ubi4 spores lose viability extremely rapidly; homozygous ubi4/ubi4 diploids are sporulation defective |
| YNL268W | [LYP1] Lysine permease; one of three amino acid permeases (Aip1p, Can1p, Lyp1p) responsible for uptake of cationic amino acids lysine permease                                                                                                                                                                                                                                                                                                                                                                                                                                             |
| YMR276W | [DSK2] Nuclear-enriched ubiquitin-like polyubiquitin-binding protein, required for spindle pole body (SPB) duplication and for transit through the G2/M phase of the cell cycle, involved in proteolysis, interacts with the proteasome ubiquitin-like protein                                                                                                                                                                                                                                                                                                                             |
| YPR002W | [PDH1] Mitochondrial protein that participates in respiration, induced by diauxic shift; homologous to E. coli PrpD, may take part in the conversion of 2-methylcitrate to 2-methylisocitrate Null: sensitive to exogenous propionate                                                                                                                                                                                                                                                                                                                                                      |
| 0685    | GO_TERM:[nucleotide-excision repair] P-Value:3.5e-04                                                                                                                                                                                                                                                                                                                                                                                                                                                                                                                                       |
| YDR314C | [RAD34] Protein involved in nucleotide excision repair (NRE); homologous to RAD4                                                                                                                                                                                                                                                                                                                                                                                                                                                                                                           |
| YML011C | [RAD33] Putative protein of unknown function; green fluorescent protein (GFP)-fusion protein localizes to the nucleus                                                                                                                                                                                                                                                                                                                                                                                                                                                                      |
| 0686    |                                                                                                                                                                                                                                                                                                                                                                                                                                                                                                                                                                                            |
| YIR012W | [SQT1] Essential protein involved in a late step of 60S ribosomal subunit assembly or modification; contains multiple WD repeats; interacts with Qsr1p in a two-hybrid assay Null mutant is inviable. Loss of SQT1 function by down regulation from an inducible promoter results in formation of half-mer polyribosomes and decreased levels of Qsr1p on free 60S subunits                                                                                                                                                                                                                |
| YJR004C | [SAG1] Alpha-agglutinin of alpha-cells, binds to Aga1p during agglutination, N-terminal half is homologous to the immunoglobulin superfamily and contains binding site for a-agglutinin, C-terminal half is highly glycosylated and contains GPI anchor alpha-agglutinin Null mutant is viable and shows loss of cellular agglutination in alpha cells                                                                                                                                                                                                                                     |
| 0687    | GO_TERM:[molecular_function] P-Value:1.7e-01                                                                                                                                                                                                                                                                                                                                                                                                                                                                                                                                               |
| YKL206C | [ADD66] Protein of unknown function involved in ER-associated protein degradation; green fluorescent protein (GFP)-fusion protein localizes to the cytoplasm                                                                                                                                                                                                                                                                                                                                                                                                                               |
| YLR199C |                                                                                                                                                                                                                                                                                                                                                                                                                                                                                                                                                                                            |
| 0688    | GO_TERM:[proteasome complex (sensu Eukaryota)] P-Value:1.5e-83 OVERLAP:[19/22S regulator] <360.10.20> SIZE:18                                                                                                                                                                                                                                                                                                                                                                                                                                                                              |
| YDL188C | [PPH22] Catalytic subunit of protein phosphatase 2A, functionally redundant with Pph21p; methylated at C terminus; forms alternate complexes with several regulatory subunits; involved in signal transduction and regulation of mitosis protein phosphatase type 2A Null mutant is viable, pph21 pph22 mutants produce very small spores in some strain backgrounds and are inviable in others, pph21 pph22 pph3 mutants are inviable                                                                                                                                                     |
| YBR173C | [UMP1] Short-lived chaperone required for correct maturation of the 20S proteasome; degraded by proteasome upon completion of its assembly; involved in ubiquitin-mediated proteolysis; mutant defective in degradation of short-lived proteins 20S proteasome maturation factor Null mutant is viable, grows slower than wild-type, is hypersensitive to cadmium ions and canavanine, accumulates Ub-protein conjugates; ump1 null homozygous diploids fail to sporulate                                                                                                                  |
| YER094C | [PUP3] Beta subunit of the 20S proteasome involved in ubiquitin-dependent catabolism; human homolog is subunit C10 20S proteasome subunit beta3 sc                                                                                                                                                                                                                                                                                                                                                                                                                                         |
| YGR135W | [PRE9] 20S proteasome beta-type subunit; the only nonessential 20S subunit proteasome component Y13                                                                                                                                                                                                                                                                                                                                                                                                                                                                                        |
| YML092C | [PRE8] 20S proteasome beta-type subunit proteasome component Y7                                                                                                                                                                                                                                                                                                                                                                                                                                                                                                                            |
| YOR362C | [PRE10] 20S proteasome alpha-type subunit proteasome component YC1 (protease yscE subunit 1)                                                                                                                                                                                                                                                                                                                                                                                                                                                                                               |
| YGR253C | [PUP2] Alpha subunit of the 20S proteasome involved in ubiquitin-dependent catabolism; human homolog is subunit zeta proteasome subunit                                                                                                                                                                                                                                                                                                                                                                                                                                                    |
| YOR157C | [PUP1] Endopeptidase with trypsin-like activity that cleaves after basic residues; beta-type subunit of 20S proteasome synthesized as a proprotein before being proteolytically processed for assembly into 20S particle; human homolog is subunit Z proteasome subunit (putative)                                                                                                                                                                                                                                                                                                         |
| YMR314W | [PRE5] 20S proteasome alpha-type subunit 20S proteasome alpha-type subunit                                                                                                                                                                                                                                                                                                                                                                                                                                                                                                                 |
| YGL011C | [SCL1] Alpha subunit of the 20S core complex of the 26S proteasome involved in the degradation of ubiquitinated substrates; essential for growth; detected in the mitochondria proteasome subunit YC7alpha/Y8 (protease yscE subunit 7) Null mutant is inviable, SCL1 is a dominant suppressor of the ts lethality of crl3                                                                                                                                                                                                                                                                 |
| YJL001W | [PRE3] 20S proteasome beta-type subunit, responsible for cleavage after acidic residues in peptides 20S proteasome subunit                                                                                                                                                                                                                                                                                                                                                                                                                                                                 |
| YOL038W | [PRE6] 20S proteasome alpha-type subunit 20S proteasome alpha-type subunit                                                                                                                                                                                                                                                                                                                                                                                                                                                                                                                 |

|                |                                                                                                                                                                                                                                                                                                                                                                                                                                                                                                                                                                                                                                                                                                                                                               |
|----------------|---------------------------------------------------------------------------------------------------------------------------------------------------------------------------------------------------------------------------------------------------------------------------------------------------------------------------------------------------------------------------------------------------------------------------------------------------------------------------------------------------------------------------------------------------------------------------------------------------------------------------------------------------------------------------------------------------------------------------------------------------------------|
| YPR103W        | [PRE2] 20S proteasome beta-type subunit, responsible for the chymotryptic activity of the proteasome proteasome subunit Null mutant is inviable, pre2 mutants exhibit defects in chymotrypsin-like proteolysis, stress response and ubiquitin signaled protein degradation                                                                                                                                                                                                                                                                                                                                                                                                                                                                                    |
| YBL041W        | [PRE7] 20S proteasome beta-type subunit proteasome subunit                                                                                                                                                                                                                                                                                                                                                                                                                                                                                                                                                                                                                                                                                                    |
| YFR050C        | [PRE4] 20S proteasome beta-type subunit necessary for peptidyl glutamyl peptide hydrolyzing activity proteasome subunit                                                                                                                                                                                                                                                                                                                                                                                                                                                                                                                                                                                                                                       |
| YMR191W        | [SPG5] Protein required for survival at high temperature during stationary phase; not required for growth on nonfermentable carbon sources                                                                                                                                                                                                                                                                                                                                                                                                                                                                                                                                                                                                                    |
| YBL039C        | [URA7] Major CTP synthase isozyme (see also URA8), catalyzes the ATP-dependent transfer of the amide nitrogen from glutamine to UTP, forming CTP, the final step in de novo biosynthesis of pyrimidines; involved in phospholipid biosynthesis CTP synthase Null mutant is viable; ura7 ura8 double deletion mutants are inviable                                                                                                                                                                                                                                                                                                                                                                                                                             |
| YOR209C        | [NPT1] Nicotinate phosphoribosyltransferase, acts in the salvage pathway of NAD <sup>+</sup> biosynthesis; required for silencing at rDNA and telomeres and has a role in silencing at mating-type loci; localized to the nucleus nicotinate phosphoribosyltransferase Mutations weaken silencing and also cause a reduction in the intracellular NAD(+) level.                                                                                                                                                                                                                                                                                                                                                                                               |
| YBR217W        | [ATG12] Ubiquitin-like modifier, conjugated via an isopeptide bond to a lysine residue of Atg5p by the E1 enzyme, Atg7p, and the E2 enzyme, Atg10p, a step that is essential for autophagy Null mutant is viable, defective in autophagy                                                                                                                                                                                                                                                                                                                                                                                                                                                                                                                      |
| YDL040C        | [NAT1] Subunit of the N-terminal acetyltransferase NatA (Nat1p, Ard1p, Nat5p); N-terminally acetylates many proteins, which influences multiple processes such as the cell cycle, heat-shock resistance, mating, sporulation, and telomeric silencing N-terminal acetyltransferase Null mutant is viable, has reduced acetyltransferase activity, derepressed silent mating type locus (HML) and fails to enter G0                                                                                                                                                                                                                                                                                                                                            |
| YBR272C        | [HSM3] Protein of unknown function, involved in DNA mismatch repair during slow growth; has weak similarity to Msh1p Null mutant is viable, hsm3 null mutants exhibit enhanced rates of spontaneous mutation to canavanine resistance and reversions of lys1-1 and his1-7, increased rate of intragenic mitotic recombination at the ADE2 gene, and reduced ability to correct DNA heteroduplexes                                                                                                                                                                                                                                                                                                                                                             |
| YEL037C        | [RAD23] Protein with ubiquitin-like N terminus, recognizes and binds damaged DNA (with Rad4p) during nucleotide excision repair; regulates Rad4p levels, subunit of Nuclear Excision Repair Factor 2 (NEF2); homolog of human HR23A and HR23B proteins ubiquitin-like protein radiation sensitive                                                                                                                                                                                                                                                                                                                                                                                                                                                             |
| <b>YGR232W</b> | [NAS6] Regulatory, non-ATPase subunit of the 26S proteasome; homolog of the human oncoprotein gankyrin, which interacts with the retinoblastoma tumor suppressor (Rb) and cyclin-dependent kinase 4/6 26S proteasome interacting protein                                                                                                                                                                                                                                                                                                                                                                                                                                                                                                                      |
| YER012W        | [PRE1] 20S proteasome beta-type subunit; localizes to the nucleus throughout the cell cycle 22.6 kDa proteasome subunit Null mutant is inviable, pre1 mutants accumulate ubiquitin-protein conjugates                                                                                                                                                                                                                                                                                                                                                                                                                                                                                                                                                         |
| <b>YER021W</b> | [RPN3] Essential, non-ATPase regulatory subunit of the 26S proteasome lid, similar to the p58 subunit of the human 26S proteasome; temperature-sensitive alleles cause metaphase arrest, suggesting a role for the proteasome in cell cycle control 26S proteasome regulatory module component Null mutant is inviable. RPN3 is a high copy suppressor of the nin1-1 temperature sensitive phenotype                                                                                                                                                                                                                                                                                                                                                          |
| YGL004C        | [RPN14] Putative non-ATPase subunit of the 19S regulatory particle of the 26S proteasome; localized to the cytoplasm                                                                                                                                                                                                                                                                                                                                                                                                                                                                                                                                                                                                                                          |
| <b>YHR027C</b> | [RPN1] Non-ATPase base subunit of the 19S regulatory particle of the 26S proteasome; may participate in the recognition of several ligands of the proteasome; contains a leucine-rich repeat (LRR) domain, a site for protein?protein interactions 26S proteasome PA700 subunit Null mutant is inviable; hrd2-1 mutation slows degradation of Hmg2p. hrd2-1 strains are sensitive to canavanine and show a global accumulation of ubiquitin-conjugated proteins, but are not temperature-sensitive                                                                                                                                                                                                                                                            |
| <b>YDL147W</b> | [RPN5] Essential, non-ATPase regulatory subunit of the 26S proteasome lid, similar to mammalian p55 subunit and to another S. cerevisiae regulatory subunit, Rpn7p proteasome regulatory particle subunit                                                                                                                                                                                                                                                                                                                                                                                                                                                                                                                                                     |
| <b>YDR394W</b> | [RPT3] One of six ATPases of the 19S regulatory particle of the 26S proteasome involved in the degradation of ubiquitinated substrates; substrate of N-acetyltransferase B Null mutant is inviable; yta2 is an extragenic suppressor of yme1 mutations                                                                                                                                                                                                                                                                                                                                                                                                                                                                                                        |
| YHL030W        | [ECM29] Major component of the proteasome; tethers the proteasome core particle to the regulatory particle, and enhances the stability of the proteasome                                                                                                                                                                                                                                                                                                                                                                                                                                                                                                                                                                                                      |
| <b>YFR052W</b> | [RPN12] Subunit of the 19S regulatory particle of the 26S proteasome lid; synthetically lethal with RPT1, which is an ATPase component of the 19S regulatory particle; physically interacts with Nob1p and Rpn3p 32-34 kDa protein Null mutant is inviable; nin1-1 mutant is temperature-sensitive mutant that shows i) higher rates of recombination and chromosome and plasmid loss; ii) greater sensitivity to UV irradiation; iii) at restrictive temperature, arrest in G2, failure to activate histone H1 kinase, and accumulation of polyubiquitinated proteins                                                                                                                                                                                        |
| YFR010W        | [UBP6] Ubiquitin-specific protease situated in the base subcomplex of the 26S proteasome, releases free ubiquitin from branched polyubiquitin chains; deletion causes hypersensitivity to cycloheximide and other toxic compounds                                                                                                                                                                                                                                                                                                                                                                                                                                                                                                                             |
| YDR363W-A      | [SEM1] Component of the lid subcomplex of the regulatory subunit of the 26S proteasome; ortholog of human DSS1 Null mutant is viable but is temperature-sensitive in a sigma1278b background (but not in a S288C background). The null mutation suppresses the temperature sensitivity of sec3-2, sec8-9, sec10-2 and sec15-1.                                                                                                                                                                                                                                                                                                                                                                                                                                |
| <b>YFR004W</b> | [RPN11] Metalloprotease subunit of the 19S regulatory particle of the 26S proteasome lid; couples the deubiquitination and degradation of proteasome substrates                                                                                                                                                                                                                                                                                                                                                                                                                                                                                                                                                                                               |
| <b>YDL097C</b> | [RPN6] Essential, non-ATPase regulatory subunit of the 26S proteasome lid required for the assembly and activity of the 26S proteasome; the human homolog (S9 protein) partially rescues Rpn6p depletion proteasome regulatory particle subunit                                                                                                                                                                                                                                                                                                                                                                                                                                                                                                               |
| <b>YKL145W</b> | [RPT1] One of six ATPases of the 19S regulatory particle of the 26S proteasome involved in the degradation of ubiquitinated substrates; required for optimal CDC20 transcription; interacts with Rpn12p and the E3 ubiquitin-protein ligase Ubr1p 26S protease subunit component (putative)ATPase                                                                                                                                                                                                                                                                                                                                                                                                                                                             |
| <b>YIL075C</b> | [RPN2] Subunit of the 26S proteasome, substrate of the N-acetyltransferase Nat1p Null mutant is inviable/null mutant is viable, but shows temperature sensitivity (conflicting reports)                                                                                                                                                                                                                                                                                                                                                                                                                                                                                                                                                                       |
| <b>YGL048C</b> | [RPT6] One of six ATPases of the 19S regulatory particle of the 26S proteasome involved in the degradation of ubiquitinated substrates; bound by ubiquitin-protein ligases Ubr1p and Ufd4p; localized mainly to the nucleus throughout the cell cycle ATPase                                                                                                                                                                                                                                                                                                                                                                                                                                                                                                  |
| <b>YOR259C</b> | [RPT4] One of six ATPases of the 19S regulatory particle of the 26S proteasome involved in the degradation of ubiquitinated substrates; required for spindle pole body duplication; localized mainly to the nucleus throughout the cell cycle 26S proteasome cap subunit component ATPase Null mutant is inviable; ts mutant strain arrests as large-budded cells after 1, 2, 3 divisions with a G2 content of DNA and a monopolar spindle; unduplicated spindle pole body is enlarged as in other monopolar mutants; they also fail to arrest at G1 when starved for a single amino acid (but do arrest at G1 when deprived of all nitrogen), are resistant to cyclohexamide, and are hypersensitive to amino acid analogs, hygromycin B and 3-aminotriazole |
| <b>YOR117W</b> | [RPT5] One of six ATPases of the 19S regulatory particle of the 26S proteasome involved in the degradation of ubiquitinated substrates; recruited to the GAL1-10 promoter region upon induction of transcription                                                                                                                                                                                                                                                                                                                                                                                                                                                                                                                                              |

|                |                                                                                                                                                                                                                                                                                                                                                                                                                                                                                                                    |
|----------------|--------------------------------------------------------------------------------------------------------------------------------------------------------------------------------------------------------------------------------------------------------------------------------------------------------------------------------------------------------------------------------------------------------------------------------------------------------------------------------------------------------------------|
| <b>YDR427W</b> | [RPN9] Non-ATPase regulatory subunit of the 26S proteasome, has similarity to putative proteasomal subunits in other species; null mutant is temperature sensitive and exhibits cell cycle and proteasome assembly defects proteasome regulatory particle subunit Null mutant is viable, temperature sensitive; rpn9 rpn10 double deletion mutants are viable                                                                                                                                                      |
| <b>YPR108W</b> | [RPN7] Essential, non-ATPase regulatory subunit of the 26S proteasome, similar to another <i>S. cerevisiae</i> regulatory subunit, Rpn5p, as well as to mammalian proteasome subunits proteasome regulatory particle subunit                                                                                                                                                                                                                                                                                       |
| <b>YHR200W</b> | [RPN10] Non-ATPase base subunit of the 19S regulatory particle (RP) of the 26S proteasome; N-terminus plays a role in maintaining the structural integrity of the RP; binds selectively to polyubiquitin chains; homolog of the mammalian S5a protein 26S proteasome component mammalian S5a protein homolog Null mutant is viable, exhibits a modest sensitivity to amino acid analogs and has increased steady-state levels of ubiquitin-protein conjugates                                                      |
| <b>YOR261C</b> | [RPN8] Essential, non-ATPase regulatory subunit of the 26S proteasome; has similarity to the human p40 proteasomal subunit and to another <i>S. cerevisiae</i> regulatory subunit, Rpn11p proteasome regulatory particle subunit                                                                                                                                                                                                                                                                                   |
| <b>YDL007W</b> | [RPT2] One of six ATPases of the 19S regulatory particle of the 26S proteasome involved in the degradation of ubiquitinated substrates; required for normal peptide hydrolysis by the core 20S particle one of the ATPase subunits of the proteasome                                                                                                                                                                                                                                                               |
| YLR421C        | [RPN13] Subunit of the 19S regulatory particle of the 26S proteasome lid Null mutant is viable but defective in degradation of ubiquitinated substrates.                                                                                                                                                                                                                                                                                                                                                           |
| 0689           | GO_TERM:[C-terminal protein lipidation] P-Value:9.5e-09 OVERLAP:[Aut2p/Aut7p complex] <260.100> SIZE:2                                                                                                                                                                                                                                                                                                                                                                                                             |
| <b>YBL078C</b> | [ATG8] Protein required for autophagy; modified by the serial action of Atg4p, Atg7p, and Atg3p, and conjugated at the C terminus with phosphatidylethanolamine, to become the form essential for generation of autophagosomes similar to LC3, a microtubule-associated protein from rat Null mutant is viable but lacks autophagocytosis and is unable to sporulate. AUT7 is a suppressor of mutant phenotypes of aut2-1 cells. Uptake of precursor Aminopeptidase I into the vacuole depends on Aut2p and Aut7p. |
| YNR007C        | [ATG3] Protein involved in autophagy; E2-like enzyme that plays a role in formation of Atg8p-phosphatidylethanolamine conjugates, which are involved in membrane dynamics during autophagy Null mutant is viable, defective in starvation-induced bulk flow transport of cytoplasmic proteins to the vacuole, exhibits decreased survival rates during starvation, defective in protein degradation in the vacuoles induced by nitrogen starvation, homozygous diploids fail to sporulate                          |
| YHR171W        | [ATG7] Autophagy-related protein and dual specificity member of the E1 family of ubiquitin-activating enzymes; mediates the conjugation of Atg12p with Atg5p and Atg8p with phosphatidylethanolamine, required steps in autophagosome formation. Null mutant is viable, defective in autophagy                                                                                                                                                                                                                     |
| YLL042C        | [ATG10] E2-like conjugating enzyme that mediates formation of the Atg12p-Atg5p conjugate, which is a critical step in autophagy protein-conjugating enzyme Defective autophagy, apg10-1 allele shows reduced viability under starvation conditions                                                                                                                                                                                                                                                                 |
| 0690           | GO_TERM:[regulation of metabolism] P-Value:1.1e-01 OVERLAP:[Chromatin assembly complex (CAC)] <90.10> SIZE:3                                                                                                                                                                                                                                                                                                                                                                                                       |
| YOR100C        | [CRC1] Mitochondrial inner membrane carnitine transporter, required for carnitine-dependent transport of acetyl-CoA from peroxisomes to mitochondria during fatty acid beta-oxidation carnitine transporter                                                                                                                                                                                                                                                                                                        |
| <b>YBR195C</b> | [MSI1] Subunit of chromatin assembly factor I (CAF-I), regulates the RAS/cAMP pathway via sequestration of Npr1p kinase; localizes to the nucleus and cytoplasm; homologous to human retinoblastoma binding proteins RbAp48 and RbAp46 chromatin assembly factor-I (CAF-I) p50 subunit negative regulator of ras-mediated cAMP induction similar to GTP-binding protein beta subunit                                                                                                                               |
| YNL183C        | [NPR1] Protein kinase that stabilizes several plasma membrane amino acid transporters by antagonizing their ubiquitin-mediated degradation protein kinase homolog inactive ammonia-sensitive amino acid permeases                                                                                                                                                                                                                                                                                                  |
| 0691           | GO_TERM:[chromatin silencing] P-Value:1.4e-10 OVERLAP:[Chromatin assembly complex (CAC)] <90.10> SIZE:3                                                                                                                                                                                                                                                                                                                                                                                                            |
| <b>YML102W</b> | [CAC2] Component of the chromatin assembly complex (with Rlf2p and Msi1p) that assembles newly synthesized histones onto recently replicated DNA, required for building functional kinetochores, conserved from yeast to humans chromatin assembly factor-I (CAF-I) p60 subunit                                                                                                                                                                                                                                    |
| YNL206C        | [RTT106] Protein with a role in regulation of Ty1 transposition Null mutant is viable, but Ty1 retrotransposition is increased.                                                                                                                                                                                                                                                                                                                                                                                    |
| <b>YPR018W</b> | [RLF2] Largest subunit (p90) of the Chromatin Assembly Complex (CAF-I) with Cac2p and Msi1p that assembles newly synthesized histones onto recently replicated DNA; involved in the maintenance of transcriptionally silent chromatin chromatin assembly factor-I (CAF-I) p90 subunit                                                                                                                                                                                                                              |
| YMR127C        | [SAS2] Histone acetyltransferase (HAT) catalytic subunit of the SAS complex (Sas2p-Sas4p-Sas5p), which acetylates free histones and nucleosomes and regulates transcriptional silencing; member of the MYSTacetyltransferase family zinc finger protein Null mutant is viable, suppresses temperature sensitive defects of orc2-1 and orc5-1; has opposite effects on HML and HMR                                                                                                                                  |
| YDR181C        | [SAS4] Subunit of the SAS complex (Sas2p, Sas4p, Sas5p), which acetylates free histones and nucleosomes and regulates transcriptional silencing; required for the HAT activity of Sas2p                                                                                                                                                                                                                                                                                                                            |
| YOR213C        | [SAS5] Subunit of the SAS complex (Sas2p, Sas4p, Sas5p), which acetylates free histones and nucleosomes and regulates transcriptional silencing; stimulates Sas2p HAT activity                                                                                                                                                                                                                                                                                                                                     |
| 0692           | GO_TERM:[nuclease activity] P-Value:3.1e-02                                                                                                                                                                                                                                                                                                                                                                                                                                                                        |
| YER138C        |                                                                                                                                                                                                                                                                                                                                                                                                                                                                                                                    |
| YEL030W        | [ECM10] Heat shock protein of the Hsp70 family, localized in mitochondrial nucleoids, plays a role in protein translocation, interacts with Mge1p in an ATP-dependent manner; overexpression induces extensive mitochondrial DNA aggregations A Tn3 insertion into this gene causes hypersensitivity to the cell surface polymer perturbing agent calcofluor white.                                                                                                                                                |
| YEL060C        | [PRB1] Vacuolar proteinase B (yscB), a serine protease of the subtilisin family; involved in protein degradation in the vacuole and required for full protein degradation during sporulation vacuolar protease B Null mutant is viable, protease B deficient, has smaller spores than wild-type embedded in a thick matrix                                                                                                                                                                                         |
| YAL015C        | [NTG1] DNA N-glycosylase and apurinic/aprimidinic (AP) lyase involved in base excision repair, localizes to the nucleus and mitochondrion DNA glycosylase Null mutant is viable but is sensitive to H202 and menadione                                                                                                                                                                                                                                                                                             |

|                         |                                                                                                                                                                                                                                                                                                                                                                                                               |
|-------------------------|---------------------------------------------------------------------------------------------------------------------------------------------------------------------------------------------------------------------------------------------------------------------------------------------------------------------------------------------------------------------------------------------------------------|
| YDL059C                 | [RAD59] Protein involved in the repair of double-strand breaks in DNA during vegetative growth via recombination and single-strand annealing; anneals complementary single-stranded DNA; homologous to Rad52p the RAD59 gene product has homology to the Rad52 protein gamma-ray sensitivity, mitotic recombination defects. rad59 is epistatic to rad52 for its repair and recombination defects.            |
| 0693                    |                                                                                                                                                                                                                                                                                                                                                                                                               |
| YHR035W                 |                                                                                                                                                                                                                                                                                                                                                                                                               |
| YLL013C                 | [PUF3] Protein that regulates degradation of specific mRNAs such as COX17, binds almost exclusively to cytoplasmic mRNAs encoding mitochondrial proteins, member of the PUF protein family that contains Pumilio homology domains                                                                                                                                                                             |
| 0694                    | GO_TERM:[biological_process] P-Value:2.3e-01                                                                                                                                                                                                                                                                                                                                                                  |
| YBR148W                 | [YSW1] Protein expressed specifically in spores                                                                                                                                                                                                                                                                                                                                                               |
| YHR121W                 | [LSM12] Protein of unknown function that interacts with Pbp1p and Pbp4p and associates with ribosomes; contains an RNA-binding LSM domain and an AD domain; may play a role in RNA processing                                                                                                                                                                                                                 |
| YJL051W                 | [YJL051W] Bud tip localized protein of unknown function; mRNA is targeted to the bud by a She2p dependent transport system; mRNA is cell cycle regulated via Fkh2p, peaking in G2/M phase; null mutant displays increased levels of spontaneous Rad52 foci                                                                                                                                                    |
| 0695                    | GO_TERM:[signal recognition particle (sensu Eukaryota)] P-Value:1.5e-17 OVERLAP:[Signal recognition particle (SRP)] <520.40> SIZE:6                                                                                                                                                                                                                                                                           |
| YCR090C                 |                                                                                                                                                                                                                                                                                                                                                                                                               |
| YDL051W                 | [LHP1] RNA binding protein required for maturation of tRNA and snRNA precursors; acts as a molecular chaperone for RNAs transcribed by polymerase III; homologous to human La (SS-B) autoantigen                                                                                                                                                                                                              |
| <a href="#">YML105C</a> | [SEC65] Subunit of the signal recognition particle (SRP), involved in protein targeting to the ER; interacts with Srp54p; homolog of mammalian SRP19                                                                                                                                                                                                                                                          |
| <a href="#">YKL122C</a> | [SRP21] Subunit of the signal recognition particle (SRP), which functions in protein targeting to the endoplasmic reticulum membrane; not found in mammalian SRP; forms a pre-SRP structure in the nucleolus that is translocated to the cytoplasm signal recognition particle component Null mutant is viable, associated with slow cell growth and inefficient protein translocation across the ER membrane |
| <a href="#">YPR088C</a> | [SRP54] Signal recognition particle (SRP) subunit (homolog of mammalian SRP54); contains the signal sequence-binding activity of SRP, interacts with the SRP RNA, and mediates binding of SRP to signal receptor; contains GTPase domain                                                                                                                                                                      |
| <a href="#">YPL210C</a> | [SRP72] Core component of the signal recognition particle (SRP) ribonucleoprotein (RNP) complex that functions in targeting nascent secretory proteins to the endoplasmic reticulum (ER) membrane signal recognition particle component Null mutant is viable, associated with slow cell growth and inefficient protein translocation across the ER membrane                                                  |
| <a href="#">YDL092W</a> | [SRP14] Signal recognition particle (SRP) subunit, interacts with the RNA component of SRP to form the Alu domain, which is the region of SRP responsible for arrest of nascent chain elongation during membrane targeting; homolog of mammalian SRP14                                                                                                                                                        |
| <a href="#">YPL243W</a> | [SRP68] Core component of the signal recognition particle (SRP) ribonucleoprotein (RNP) complex that functions in targeting nascent secretory proteins to the endoplasmic reticulum (ER) membrane signal recognition particle component Null mutant is viable, associated with slow cell growth and inefficient protein translocation across the ER membrane                                                  |
| 0696                    | GO_TERM:[molecular_function] P-Value:1.7e-01                                                                                                                                                                                                                                                                                                                                                                  |
| YDR275W                 | [BSC2] Protein of unknown function, ORF exhibits genomic organization compatible with a translational readthrough-dependent mode of expression                                                                                                                                                                                                                                                                |
| YDR363W                 | [ESC2] Protein involved in mating-type locus silencing, interacts with Sir2p; probably functions to recruit or stabilize Sir proteins                                                                                                                                                                                                                                                                         |
| 0697                    | GO_TERM:[mitochondrial matrix] P-Value:2.8e-02                                                                                                                                                                                                                                                                                                                                                                |
| YPL216W                 |                                                                                                                                                                                                                                                                                                                                                                                                               |
| YKL040C                 | [NFU1] Protein involved in iron metabolism in mitochondria; similar to NifU, which is a protein required for the maturation of the Fe/S clusters of nitrogenase in nitrogen-fixing bacteria Null mutant is viable on YPD 30 degrees C, and is synthetically lethal with SSQ1                                                                                                                                  |
| YLL027W                 | [ISA1] Mitochondrial matrix protein involved in biogenesis of the iron-sulfur (Fe/S) cluster of Fe/S proteins, isa1 deletion causes loss of mitochondrial DNA and respiratory deficiency; depletion reduces growth on nonfermentable carbon sources                                                                                                                                                           |
| 0698                    | GO_TERM:[RNA catabolism] P-Value:1.4e-06 OVERLAP:[Nonsense-mediated mRNA decay pathway complex] <300> SIZE:3                                                                                                                                                                                                                                                                                                  |
| YBR021W                 | [FUR4] Uracil permease, localized to the plasma membrane; expression is tightly regulated by uracil levels and environmental cues uracil permease                                                                                                                                                                                                                                                             |
| YML052W                 | [SUR7] Integral membrane protein localized to eisosomes, large immobile protein structures at the cell cortex associated with endocytosis; sporulation and plasma membrane sphingolipid content are altered in mutants; has homologs YNL194C and FMP45 integral membrane protein Null mutant is viable, exhibits no growth defects on non-fermentable carbon sources or sensitivities to 3-AT or high salt    |

|           |                                                                                                                                                                                                                                                                                                                                                                                                                                                                            |
|-----------|----------------------------------------------------------------------------------------------------------------------------------------------------------------------------------------------------------------------------------------------------------------------------------------------------------------------------------------------------------------------------------------------------------------------------------------------------------------------------|
| YDR495C   | [VPS3] Cytoplasmic protein required for the sorting and processing of soluble vacuolar proteins, acidification of the vacuolar lumen, and assembly of the vacuolar H <sup>+</sup> -ATPase Null mutant is viable, grows slower than wild-type, exhibits altered vacuolar morphology and defects in vacuolar segregation                                                                                                                                                     |
| YHL009W-B |                                                                                                                                                                                                                                                                                                                                                                                                                                                                            |
| YML005W   | [TRM12] S-adenosylmethionine-dependent methyltransferase of the seven beta-strand family; required for wybutosine formation in phenylalanine-accepting tRNA tRNA methyltransferase                                                                                                                                                                                                                                                                                         |
| YKL149C   | [DBR1] RNA lariat debranching enzyme, involved in intron turnover; required for efficient Ty1 transposition RNA lariat debranching enzyme Null mutant is viable; reduces Ty1 transposition frequency; defective in the process of intron turnover                                                                                                                                                                                                                          |
| YFL020C   | [PAU5] Part of 23-member seripauperin multigene family encoded mainly in subtelomeric regions, active during alcoholic fermentation, regulated by anaerobiosis, negatively regulated by oxygen, repressed by heme                                                                                                                                                                                                                                                          |
| YDR172W   | [SUP35] Translation termination factor eRF3; altered protein conformation creates the [PSI(+)] prion, a dominant cytoplasmically inherited protein aggregate that alters translational fidelity and creates a nonsense suppressor phenotype translation termination factor eRF3 accumulation of large budded cells and substantial arrest of DNA synthesis at the nonpermissive temperature (arrests at G(sub)1/S transition); omnipotent suppressor of nonsense mutations |
| YMR080C   | [NAM7] ATP-dependent RNA helicase of the SFI superfamily, required for nonsense mediated mRNA decay and for efficient translation termination at nonsense codons; involved in telomere maintenance helicase (putative) Null mutant is viable, exhibits impairment in respiratory growth that is exacerbated by low temperatures; exhibits stabilization of nonsense-containing mRNAs which leads to a nonsense suppression phenotype                                       |
| YGR072W   | [UPF3] Component of the nonsense-mediated mRNA decay (NMD) pathway, along with Nam7p and Nmd2p; involved in decay of mRNA containing nonsense codons; involved in telomere maintenance Null mutant is viable but shows increased accumulation of mRNA containing a premature stop codon due to mRNA stabilization                                                                                                                                                          |
| YHR077C   | [NMD2] Protein involved in the nonsense-mediated mRNA decay (NMD) pathway; interacts with Nam7p and Upf3p; involved in telomere maintenance Null mutant is viable, exhibits stabilization of nonsense-containing mRNAs                                                                                                                                                                                                                                                     |
| 0699      | GO_TERM:[phosphoinositide-mediated signaling] P-Value:2.5e-04                                                                                                                                                                                                                                                                                                                                                                                                              |
| YKL051W   | [SFK1] Plasma membrane protein that may act together with or upstream of Stt4p to generate normal levels of the essential phospholipid PI4P, at least partially mediates proper localization of Stt4p to the plasma membrane                                                                                                                                                                                                                                               |
| YHL032C   | [GUT1] Glycerol kinase, converts glycerol to glycerol-3-phosphate; glucose repression of expression is mediated by Adr1p and Ino2p-Ino4p; derepression of expression on non-fermentable carbon sources is mediated by Opi1p and Rsf1p converts glycerol to glycerol-3-phosphate glycerol kinase Null mutant is viable but is unable to grow on glycerol                                                                                                                    |
| YLR305C   | [STT4] Phosphatidylinositol-4-kinase that functions in the Pkc1p protein kinase pathway; required for normal vacuole morphology, cell wall integrity, and actin cytoskeleton organization phosphatidylinositol-4-kinase similar to VPC34 Null mutant is viable, has an osmoremedial phenotype, staurosporine sensitive, stt4 mutations can be suppressed by overexpression of PKC1/STT1 or MSS4, Bleomycin sensitive                                                       |
| 0700      | GO_TERM:[protein serine/threonine phosphatase activity] P-Value:1.7e-03                                                                                                                                                                                                                                                                                                                                                                                                    |
| YMR111C   |                                                                                                                                                                                                                                                                                                                                                                                                                                                                            |
| YGL140C   |                                                                                                                                                                                                                                                                                                                                                                                                                                                                            |
| YKL117W   | [SBA1] Co-chaperone that binds to and regulates Hsp90 family chaperones; important for pp60v-src activity in yeast; homologous to the mammalian p23 proteins HSP90 associated co-chaperone Null mutant is viable, exhibits slow growth at 18 degrees and 37 degrees; synthetic growth defects in SBA1-1/sti1-1 double mutant                                                                                                                                               |
| YNR032W   | [PPG1] Putative serine/threonine protein phosphatase, required for glycogen accumulation; interacts with Tap42p, which binds to and regulates other protein phosphatases Null mutant is viable but accumulates less glycogen                                                                                                                                                                                                                                               |
| YGL138C   |                                                                                                                                                                                                                                                                                                                                                                                                                                                                            |
| YGR123C   | [PPT1] Protein serine/threonine phosphatase with similarity to human phosphatase PP5; present in both the nucleus and cytoplasm; expressed during logarithmic growth                                                                                                                                                                                                                                                                                                       |
| 0701      | GO_TERM:[catalytic activity] P-Value:7.3e-02                                                                                                                                                                                                                                                                                                                                                                                                                               |
| YJR035W   | [RAD26] Protein involved in transcription-coupled repair nucleotide excision repair of UV-induced DNA lesions; homolog of human CSB protein DNA dependent ATPase human Cockayne syndrome B gene ERCC6 homolog Null mutant is viable, defective in transcription-coupled repair, and hypermutable following exposure to UV light and shows delayed recovered of growth after UV exposure; rad7 rad26 and rad16 rad26 double mutants show enhanced sensitivity to UV light   |
| YMR318C   | [ADH6] NADPH-dependent cinnamyl alcohol dehydrogenase family member with broad substrate specificity; may be involved in fusel alcohol synthesis or in aldehyde tolerance medium chain alcohol dehydrogenase                                                                                                                                                                                                                                                               |
| 0702      | GO_TERM:[molecular_function] P-Value:5.5e-01                                                                                                                                                                                                                                                                                                                                                                                                                               |
| YKL073W   | [LHS1] Molecular chaperone of the endoplasmic reticulum lumen, involved in polypeptide translocation and folding; member of the Hsp70 family; localizes to the lumen of the ER; regulated by the unfolded protein response pathway Hsp70 family                                                                                                                                                                                                                            |
| YNL321W   |                                                                                                                                                                                                                                                                                                                                                                                                                                                                            |
| YBL044W   |                                                                                                                                                                                                                                                                                                                                                                                                                                                                            |
| YJL159W   | [HSP150] O-mannosylated heat shock protein that is secreted and covalently attached to the cell wall via beta-1,3-glucan and disulfide bridges; required for cell wall stability; induced by heat shock, oxidative stress, and nitrogen limitation heat shock protein secretory glycoprotein                                                                                                                                                                               |

|                |                                                                                                                                                                                                                                                                                                                                                                                                                                         |
|----------------|-----------------------------------------------------------------------------------------------------------------------------------------------------------------------------------------------------------------------------------------------------------------------------------------------------------------------------------------------------------------------------------------------------------------------------------------|
| 0703           | GO_TERM:[lipid metabolism] P-Value:7.0e-03                                                                                                                                                                                                                                                                                                                                                                                              |
| YMR246W        | [FAA4] Long chain fatty acyl-CoA synthetase, regulates protein modification during growth in the presence of ethanol, functions to incorporate palmitic acid into phospholipids and neutral lipids long chain fatty acyl:CoA synthetase long-chain fatty acid:CoA ligase Not essential for vegetative growth when fatty acid synthase (fas) is active                                                                                   |
| YPL206C        |                                                                                                                                                                                                                                                                                                                                                                                                                                         |
| 0704           | GO_TERM:[biological_process] P-Value:2.3e-01 OVERLAP:[cytoplasmic ribosomal large subunit] <500.40.10> SIZE:81                                                                                                                                                                                                                                                                                                                          |
| <b>YOL039W</b> | [RPP2A] Ribosomal protein P2 alpha, a component of the ribosomal stalk, which is involved in the interaction between translational elongation factors and the ribosome; regulates the accumulation of P1 (Rpp1Ap and Rpp1Bp) in the cytoplasm 60S acidic ribosomal protein P2A (L44) (A2) (YP2alpha)                                                                                                                                    |
| YKR021W        |                                                                                                                                                                                                                                                                                                                                                                                                                                         |
| YOL014W        |                                                                                                                                                                                                                                                                                                                                                                                                                                         |
| 0705           | GO_TERM:[DNA binding] P-Value:3.7e-02                                                                                                                                                                                                                                                                                                                                                                                                   |
| YGR017W        |                                                                                                                                                                                                                                                                                                                                                                                                                                         |
| YLR072W        |                                                                                                                                                                                                                                                                                                                                                                                                                                         |
| YKR063C        | [LAS1] Essential nuclear protein possibly involved in bud formation and morphogenesis; mutants require the SSD1-v allele for viability                                                                                                                                                                                                                                                                                                  |
| YLR403W        | [SFP1] Transcription factor that controls expression of many ribosome biogenesis genes in response to nutrients and stress, regulates G2/M transitions during mitotic cell cycle and DNA-damage response, involved in cell size modulation split zinc finger protein Null mutant is viable, grows slowly, cells have multiple nucleated buds                                                                                            |
| YOR025W        | [HST3] Member of the Sir2 family of NAD(+)-dependent protein deacetylases; involved along with Hst4p in telomeric silencing, cell cycle progression, radiation resistance, genomic stability and short-chain fatty acid metabolism                                                                                                                                                                                                      |
| 0706           | GO_TERM:[protein serine/threonine phosphatase activity] P-Value:3.7e-06 OVERLAP:[other respiration chain complexes] <420.60> SIZE:14                                                                                                                                                                                                                                                                                                    |
| <b>YMR145C</b> | [NDE1] Mitochondrial external NADH dehydrogenase, catalyzes the oxidation of cytosolic NADH; Nde1p and Nde2p are involved in providing the cytosolic NADH to the mitochondrial respiratory chain NADH:ubiquinone oxidoreductase Type II NAD(P)H:quinone oxidoreductase                                                                                                                                                                  |
| YDL219W        | [DTD1] D-Tyr-tRNA(Tyr) deacylase, functions in protein translation, may affect nonsense suppression via alteration of the protein synthesis machinery; ubiquitous among eukaryotes D-Tyr-tRNA(Tyr) deacylase                                                                                                                                                                                                                            |
| YKR028W        | [SAP190] Protein that forms a complex with the Sit4p protein phosphatase and is required for its function; member of a family of similar proteins including Sap4p, Sap155p, and Sap185p type 2A-related protein phosphatase                                                                                                                                                                                                             |
| YDL047W        | [SIT4] Type 2A-related serine-threonine phosphatase that functions in the G1/S transition of the mitotic cycle; cytoplasmic and nuclear protein that modulates functions mediated by Pkc1p including cell wall and actin cytoskeleton organization similar to catalytic subunit of bovine type 2A protein phosphatase sit1-sit4 or sit2-sit4 double mutants are lethal                                                                  |
| YJL098W        | [SAP185] Protein that forms a complex with the Sit4p protein phosphatase and is required for its function; member of a family of similar proteins including Sap4p, Sap155p, and Sap190p Null mutant is viable; sap185 sap190 double mutants grow slowly; sap155 sap185 sap190 triple mutants are inviable in ssd1-d backgrounds                                                                                                         |
| 0707           | GO_TERM:[Ras protein signal transduction] P-Value:1.6e-07                                                                                                                                                                                                                                                                                                                                                                               |
| YBR225W        |                                                                                                                                                                                                                                                                                                                                                                                                                                         |
| YGL197W        | [MDS3] Protein with an N-terminal kelch-like domain, putative negative regulator of early meiotic gene expression; required, with Pmd1p, for growth under alkaline conditions Null mutant is viable; mds3 pmd1 double deletion mutants exhibit starvation-independent expression of early sporulation-specific genes; mds3 is a suppressor of mck1 sporulation defects; amino terminal truncation generates a dominant negative allele  |
| YOR101W        | [RAS1] GTPase involved in G-protein signaling in the adenylate cyclase activating pathway, plays a role in cell proliferation; localized to the plasma membrane; homolog of mammalian RAS proto-oncogenes ras homolog                                                                                                                                                                                                                   |
| YLR310C        | [CDC25] Membrane bound guanine nucleotide exchange factor (GEF or GDP-release factor); indirectly regulates adenylate cyclase through activation of Ras1p and Ras2p by stimulating the exchange of GDP for GTP; required for progression through G1 adenylate cyclase regulatory protein Null mutant is inviable; arrests at G(sub)1; low levels cAMP and decreased levels of Mg2+-dependent cyclase activity                           |
| YLL016W        |                                                                                                                                                                                                                                                                                                                                                                                                                                         |
| YNL098C        | [RAS2] GTP-binding protein that regulates the nitrogen starvation response, sporulation, and filamentous growth; farnesylation and palmitoylation required for activity and localization to plasma membrane; homolog of mammalian Ras proto-oncogenes small GTP-binding protein Loss of function mutants grow poorly on nonfermentable carbon sources, sporulate in rich media and are unable to differentiate into a pseudohyphal form |
| 0708           | GO_TERM:[catalytic activity] P-Value:4.0e-02 OVERLAP:[Actin-associated proteins] <140.20.20> SIZE:25                                                                                                                                                                                                                                                                                                                                    |

|                |                                                                                                                                                                                                                                                                                                                                                                                           |
|----------------|-------------------------------------------------------------------------------------------------------------------------------------------------------------------------------------------------------------------------------------------------------------------------------------------------------------------------------------------------------------------------------------------|
| <b>YHR179W</b> | [OYE2] Widely conserved NADPH oxidoreductase containing flavin mononucleotide (FMN), homologous to Oye3p with slight differences in ligand binding and catalytic properties; may be involved in sterol metabolism NADPH dehydrogenase (old yellow enzyme), isoform 2                                                                                                                      |
| YLL060C        | [GTT2] Glutathione S-transferase capable of homodimerization; functional overlap with Gtt2p, Grx1p, and Grx2p glutathione transferase                                                                                                                                                                                                                                                     |
| YOR074C        | [CDC21] Thymidylate synthase, required for de novo biosynthesis of pyrimidine deoxyribonucleotides; expression is induced at G1/S thymidylate synthase defective in continued replication during S phase of the cell cycle; temperature-sensitive thymidylate auxotroph                                                                                                                   |
| 0709           | GO_TERM:[peptidyl-diphthamide metabolism] P-Value:8.0e-08 OVERLAP:[cytoplasmic ribosomal small subunit] <500.40.20> SIZE:57                                                                                                                                                                                                                                                               |
| YAL020C        | [ATS1] Protein with a potential role in regulatory interactions between microtubules and the cell cycle, as suggested by genetic and physical interactions with Nap1p and genetic interactions with TUB1 slow growth                                                                                                                                                                      |
| <b>YOL121C</b> | [RPS19A] Protein component of the small (40S) ribosomal subunit; nearly identical to Rps19Bp and has similarity to rat S19 ribosomal protein ribosomal protein S19A (S16aA) (rp55A) (YS16A)                                                                                                                                                                                               |
| YER001W        | [MNN1] Alpha-1,3-mannosyltransferase, integral membrane glycoprotein of the Golgi complex, required for addition of alpha1,3-mannose linkages to N-linked and O-linked oligosaccharides, one of five S. cerevisiae proteins of the MNN1 family alpha-1,3-mannosyltransferase                                                                                                              |
| YBL071W-A      | [KTI11] Protein required for synthesis of diphthamide, which is a modified histidine residue of translation elongation factor 2 (Eft1p or Eft2p); functions with Dph1p, Dph2p, Jjj3p, and Dph5p; may act in a complex with Dph1p and Dph2p                                                                                                                                                |
| YIL103W        | [DPH1] Protein required, along with Dph2p, Kti11p, Jjj3p, and Dph5p, for synthesis of diphthamide, which is a modified histidine residue of translation elongation factor 2 (Eft1p or Eft2p); may act in a complex with Dph2p and Kti11p                                                                                                                                                  |
| YKL191W        | [DPH2] Protein required, along with Dph1p, Kti11p, Jjj3p, and Dph5p, for synthesis of diphthamide, which is a modified histidine residue of translation elongation factor 2 (Eft1p or Eft2p); may act in a complex with Dph1p and Kti11p                                                                                                                                                  |
| 0710           | GO_TERM:[mitochondrion] P-Value:2.4e-01                                                                                                                                                                                                                                                                                                                                                   |
| YDR376W        | [ARH1] Oxidoreductase of the mitochondrial inner membrane, involved in cytoplasmic and mitochondrial iron homeostasis and required for activity of Fe-S cluster-containing enzymes; one of the few mitochondrial proteins essential for viability adrenodoxin oxidoreductase homolog                                                                                                      |
| YIR024C        |                                                                                                                                                                                                                                                                                                                                                                                           |
| 0711           | GO_TERM:[nucleic acid binding] P-Value:1.7e-02                                                                                                                                                                                                                                                                                                                                            |
| YIR013C        | [GAT4] Protein containing GATA family zinc finger motifs being investigated                                                                                                                                                                                                                                                                                                               |
| YJL102W        | [MEF2] Mitochondrial elongation factor involved in translational elongation mitochondrial elongation factor G-like protein                                                                                                                                                                                                                                                                |
| 0712           | GO_TERM:[chromatin silencing] P-Value:1.1e-16 OVERLAP:[Replication initiation complex] <410.20> SIZE:8                                                                                                                                                                                                                                                                                    |
| YDR006C        | [SOK1] Protein whose overexpression suppresses the growth defect of mutants lacking protein kinase A activity; involved in cAMP-mediated signaling; localized to the nucleus; similar to the mouse testis-specific protein PBS13                                                                                                                                                          |
| YOR178C        | [GAC1] Regulatory subunit for Glc7p type-1 protein phosphatase (PP1), tethers Glc7p to Gsy2p glycogen synthase, binds Hsf1p heat shock transcription factor, required for induction of some HSF-regulated genes under heat shock Glc7p regulatory subunit                                                                                                                                 |
| YJR154W        |                                                                                                                                                                                                                                                                                                                                                                                           |
| YCR087C-A      |                                                                                                                                                                                                                                                                                                                                                                                           |
| YOR279C        | [RFM1] DNA-binding protein required for vegetative repression of middle sporulation genes; specificity factor that directs the Hst1p histone deacetylase to some of the promoters regulated by Sum1p; involved in telomere maintenance DNA-binding protein Null mutant is viable, derepression of middle meiosis-specific genes; required for SUM1-1 mediated suppression of sir2 mutants |
| YLL022C        | [HIF1] Non-essential component of the HAT-B histone acetyltransferase complex (Hat1p-Hat2p-Hif1p), localized to the nucleus; has a role in telomeric silencing Null mutant is viable and does not show any obvious phenotypes                                                                                                                                                             |
| YDR310C        | [SUM1] Transcriptional repressor required for mitotic repression of middle sporulation-specific genes; involved in telomere maintenance, regulated by the pachytene checkpoint Restores silencing at HML and HMR in presence of sir2, sir3 and sir4 mutants                                                                                                                               |
| <b>YDR052C</b> | [DBF4] Regulatory subunit of Cdc7p-Dbf4p kinase complex, required for Cdc7p kinase activity and initiation of DNA replication; phosphorylates the Mcm2-7 family of proteins; cell cycle regulated Cdc7p-Dbf4p kinase complex regulatory subunit Null mutant is inviable; conditional alleles cause cell cycle arrest at the G1/S transition; dumbbell shape                               |
| YEL056W        | [HAT2] Subunit of the Hat1p-Hat2p histone acetyltransferase complex; required for high affinity binding of the complex to free histone H4, thereby enhancing Hat1p activity; similar to human RbAp46 and 48; has a role in telomeric silencing histone acetyltransferase subunit                                                                                                          |
| YPL001W        | [HAT1] Catalytic subunit of the Hat1p-Hat2p histone acetyltransferase complex that uses the cofactor acetyl coenzyme A, to acetylate free nuclear and cytoplasmic histone H4; involved in telomeric silencing and DNA double-strand break repair histone acetyltransferase                                                                                                                |
| <b>YBR060C</b> | [ORC2] Subunit of the origin recognition complex, which directs DNA replication by binding to replication origins and is also involved in transcriptional silencing; may be phosphorylated by Cdc28p origin recognition complex subunit 2                                                                                                                                                 |
| <b>YLL004W</b> | [ORC3] Subunit of the origin recognition complex, which directs DNA replication by binding to replication origins and is also involved in transcriptional silencing origin recognition complex subunit                                                                                                                                                                                    |

|                |                                                                                                                                                                                                                                                                                                                                                                                                                                                                                                                                                                          |
|----------------|--------------------------------------------------------------------------------------------------------------------------------------------------------------------------------------------------------------------------------------------------------------------------------------------------------------------------------------------------------------------------------------------------------------------------------------------------------------------------------------------------------------------------------------------------------------------------|
| <b>YNL261W</b> | [ORC5] Subunit of the origin recognition complex, which directs DNA replication by binding to replication origins and is also involved in transcriptional silencing ATP-binding site (putative) origin recognition complex fifth largest subunit orc5-1 mutant is temperature-sensitive, has defects in transcriptional silencing, has elevated rate of plasmid loss and inefficient initiation of DNA replication at the permissive temperature, and arrests at the nonpermissive temperature; CDC6 is multicopy suppressor of orc5-1                                   |
| <b>YML065W</b> | [ORC1] Largest subunit of the origin recognition complex, which directs DNA replication by binding to replication origins and is also involved in transcriptional silencing; may be phosphorylated by Cdc28p origin recognition complex (ORC) 120 kDa (largest) subunit similar to Cdc6p, Cdc18p, and Sir3p and to proteins from <i>K. lactis</i> , <i>S. pombe</i> , and humans                                                                                                                                                                                         |
| <b>YHR118C</b> | [ORC6] Subunit of the origin recognition complex, which directs DNA replication by binding to replication origins and is also involved in transcriptional silencing; may be phosphorylated by Cdc28p ORC 50 kDa subunit                                                                                                                                                                                                                                                                                                                                                  |
| <b>YPR162C</b> | [ORC4] Subunit of the origin recognition complex, which directs DNA replication by binding to replication origins and is also involved in transcriptional silencing origin recognition complex (ORC) 56 kDa subunit                                                                                                                                                                                                                                                                                                                                                      |
| 0713           | GO_TERM:[histone deacetylase complex] P-Value:1.4e-15 OVERLAP:[HDB complex] <240.20> SIZE:3                                                                                                                                                                                                                                                                                                                                                                                                                                                                              |
| YGR263C        |                                                                                                                                                                                                                                                                                                                                                                                                                                                                                                                                                                          |
| YNL066W        | [SUN4] Cell wall protein related to glucanases, possibly involved in cell wall septation; member of the SUN family                                                                                                                                                                                                                                                                                                                                                                                                                                                       |
| YOR337W        | [TEA1] Ty1 enhancer activator required for full levels of Ty enhancer-mediated transcription; C6 zinc cluster DNA-binding protein Diminished Ty1 expression                                                                                                                                                                                                                                                                                                                                                                                                              |
| YFL031W        | [HAC1] bZIP transcription factor (ATF/CREB1 homolog) that regulates the unfolded protein response, via UPRE binding, and membrane biogenesis; ER stress-induced splicing pathway utilizing Ire1p, Trl1p and Ada5p facilitates efficient Hac1p synthesis bZIP (basic-leucine zipper) protein Null mutant is viable but is sensitive to caffeine (suppressed by high-copy SRA5) and stresses that produce unfolded proteins. High-copy HAC1 suppresses <i>S. pombe</i> cdc10-129                                                                                           |
| YMR075W        | [RCO1] Essential subunit of the histone deacetylase Rpd3S complex; interacts with Eaf3p                                                                                                                                                                                                                                                                                                                                                                                                                                                                                  |
| <b>YOL004W</b> | [SIN3] DNA binding subunit of Sin3p-Rpd3p histone deacetylase complex, involved in transcriptional repression of meiosis-specific genes during vegetative growth and silencing; involved in telomere maintenance DNA binding protein involved in transcriptional regulation inviable, reduced potassium dependency                                                                                                                                                                                                                                                       |
| <b>YNL330C</b> | [RPD3] Histone deacetylase; regulates transcription and silencing histone deacetylase Null mutant is viable and shows reduced potassium dependency, mating defects, hypersensitivity to cycloheximide, and constitutive derepression of acid phosphatase; mutant epistasis analysis indicates that RPD3 acts in the same pathway as UME4/SIN3; homozygous mutant diploid is defective in sporulation and recombination                                                                                                                                                   |
| YDR207C        | [UME6] Key transcriptional regulator of early meiotic genes, binds URS1 upstream regulatory sequence, couples metabolic responses to nutritional cues with initiation and progression of meiosis, forms complex with Ime1p, and also with Sin3p-Rpd3p C6 zinc finger URS1-binding protein Null mutant is viable. Exhibits defects in IME1-dependent activation and repression through URS1 sites. ume6 does not require Mata/Matalpha, starvation, IME1, or IME2 for derepressed expression in mitosis and is epistatic to lethality of IME1 overexpression in haploids. |
| YPL181W        | [CTI6] Protein that relieves transcriptional repression by binding to the Cyc8p-Tup1p corepressor and recruiting the SAGA complex to the repressed promoter; contains a PHD finger domain                                                                                                                                                                                                                                                                                                                                                                                |
| YDL076C        | [RXT3] Protein of unknown function, may be involved in chromatin silencing                                                                                                                                                                                                                                                                                                                                                                                                                                                                                               |
| YPL139C        | [UME1] Negative regulator of meiosis, required for repression of a subset of meiotic genes during vegetative growth, binding of histone deacetylase Rpd3p required for activity, contains a NEE box and a WD repeat motif; homologous with Wtm1p, Wtm2p transcriptional modulator Null mutant is viable, expression of the meiotic gene IME2 in null haploid                                                                                                                                                                                                             |
| <b>YMR263W</b> | [SAP30] Subunit of a histone deacetylase complex, along with Rpd3p and Sin3p, that is involved in silencing at telomeres, rDNA, and silent mating-type loci; involved in telomere maintenance                                                                                                                                                                                                                                                                                                                                                                            |
| YKL185W        | [ASH1] Zinc-finger inhibitor of HO transcription; mRNA is localized and translated in the distal tip of anaphase cells, resulting in accumulation of Ash1p in daughter cell nuclei and inhibition of HO expression; potential Cdc28p substrate zinc finger transcription factor Mutant ash1 daughters can transcribe HO and switch mating type                                                                                                                                                                                                                           |
| YIL084C        | [SDS3] Component of the Rpd3p/Sin3p deacetylase complex required for its structural integrity and catalytic activity, involved in transcriptional silencing and required for sporulation; cells defective in SDS3 display pleiotropic phenotypes extragenic suppressor of a silencing defective rap 1s hmr delta A strain, sporulation defects                                                                                                                                                                                                                           |
| YNL097C        | [PHO23] Probable component of the Rpd3 histone deacetylase complex, involved in transcriptional regulation of PHO5; C-terminus has similarity to human candidate tumor suppressor p33(ING1) Null mutant is viable but shows constitutive PHO5 expression                                                                                                                                                                                                                                                                                                                 |
| YAL013W        | [DEP1] Transcriptional modulator involved in regulation of structural phospholipid biosynthesis genes and metabolically unrelated genes, as well as maintenance of telomeres, mating efficiency, and sporulation                                                                                                                                                                                                                                                                                                                                                         |
| YBR095C        | [RXT2] Subunit of the histone deacetylase Rpd3L complex; possibly involved in cell fusion and invasive growth                                                                                                                                                                                                                                                                                                                                                                                                                                                            |
| 0714           |                                                                                                                                                                                                                                                                                                                                                                                                                                                                                                                                                                          |
| YER180C        | [ISC10] Protein required for sporulation, transcript is induced 7.5 hours after induction of meiosis, expected to play significant role in the formation of reproductive cells Mutant shows greatly reduced ability to sporulate                                                                                                                                                                                                                                                                                                                                         |
| YGL026C        | [TRP5] Tryptophan synthase involved in tryptophan biosynthesis, regulated by the general control system of amino acid biosynthesis tryptophan synthase Null mutant is viable and requires tryptophan                                                                                                                                                                                                                                                                                                                                                                     |
| 0715           | GO_TERM:[nuclear chromatin] P-Value:1.7e-05                                                                                                                                                                                                                                                                                                                                                                                                                                                                                                                              |
| YDR409W        | [SIZ1] SUMO ligase that promotes the attachment of sumo (Smt3p; small ubiquitin-related modifier) to proteins; binds Ubc9p and may bind septins; specifically required for sumoylation of septins in vivo; localized to the septin ring chromatin protein; SUMO1/Smt3 ligase Null mutant is viable. SIZ1 is a dosage bypass suppressor of an SMT4 deletion. A siz1 siz2 deletion has a synthetic phenotype (slow growth). Null mutant exhibits defective Smt3-modification of septins.                                                                                   |

|                |                                                                                                                                                                                                                                                                                                                                                                                                                                                                                                                                                                                     |
|----------------|-------------------------------------------------------------------------------------------------------------------------------------------------------------------------------------------------------------------------------------------------------------------------------------------------------------------------------------------------------------------------------------------------------------------------------------------------------------------------------------------------------------------------------------------------------------------------------------|
| YDL064W        | [UBC9] SUMO-conjugating enzyme involved in the Smt3p conjugation pathway; nuclear protein required for S- and M-phase cyclin degradation and mitotic control; involved in proteolysis mediated by the anaphase-promoting complex cyclosome (APCC) SUMO-conjugating enzyme                                                                                                                                                                                                                                                                                                           |
| YCR066W        | [RAD18] Protein involved in postreplication repair; binds single-stranded DNA and has single-stranded DNA dependent ATPase activity; forms heterodimer with Rad6p; contains RING-finger motif ATPase (putative) zinc finger protein Radiation-sensitive. mgs1 exhibits a synergistic growth defect with rad18. Growth defects of mgs1 rad18 double mutants are suppressed by a mutation in SRS2 or by overexpression of Rad52. Deletion mutants of this post-replication repair (PRR) gene do not have any cross-link-induced mutations but show increased levels of recombination. |
| YLR032W        | [RAD5] Single-stranded DNA-dependent ATPase, involved in postreplication repair; contains RING finger domain ATPase (putative) DNA helicase (putative) Radiation-sensitive. mgs1 exhibits a synergistic growth defect with rad5. mgs1 rad5 double mutant has increased sensitivity to hydroxyurea and a greatly increased spontaneous mutation rate. Deletion mutants of this post-replication repair (PRR) gene do not have any cross-link-induced mutations but show increased levels of recombination.                                                                           |
| 0716           | GO_TERM:[phosphoprotein phosphatase activity] P-Value:2.3e-04                                                                                                                                                                                                                                                                                                                                                                                                                                                                                                                       |
| YCR079W        |                                                                                                                                                                                                                                                                                                                                                                                                                                                                                                                                                                                     |
| YMR277W        | [FCP1] Carboxy-terminal domain (CTD) phosphatase, essential for dephosphorylation of the repeated C-terminal domain of the RNA polymerase II large subunit (Rpo21p) TFIIF interacting component of CTD phosphatase                                                                                                                                                                                                                                                                                                                                                                  |
| 0717           | GO_TERM:[transcription regulator activity] P-Value:2.1e-03                                                                                                                                                                                                                                                                                                                                                                                                                                                                                                                          |
| YDR123C        | [INO2] Component of the heteromeric Ino2p/Ino4p basic helix-loop-helix transcription activator that binds inositol/choline-responsive elements (ICREs), required for derepression of phospholipid biosynthetic genes in response to inositol depletion helix-loop-helix protein The null mutant is viable but auxotrophic for inositol and choline. The null mutant can also display aberrant cell shape and defects in nuclear segregation. Homozygous mutant ino2 delta-1 diploids fail to sporulate. Other mutant alleles show pleiotropic defects in phospholipid metabolism.   |
| YHL020C        | [OPI1] Transcriptional regulator of a variety of genes; phosphorylation by protein kinase A stimulates Opi1p function in negative regulation of phospholipid biosynthetic genes; involved in telomere maintenance The null mutant is viable but constitutively accumulates INO1 mRNA.                                                                                                                                                                                                                                                                                               |
| 0718           | GO_TERM:[cytoplasmic part] P-Value:7.9e-01 OVERLAP:[Arginine-specific carbamoylphosphate synthase] <80> SIZE:2                                                                                                                                                                                                                                                                                                                                                                                                                                                                      |
| YMR134W        |                                                                                                                                                                                                                                                                                                                                                                                                                                                                                                                                                                                     |
| <b>YOR303W</b> | [CPA1] Small subunit of carbamoyl phosphate synthetase, which catalyzes a step in the synthesis of citrulline, an arginine precursor; translationally regulated by an attenuator peptide encoded by YOR302W within the CPA1 mRNA 5'-leader arginine specific carbamoyl phosphate synthetase                                                                                                                                                                                                                                                                                         |
| 0719           | GO_TERM:[monovalent inorganic cation homeostasis] P-Value:5.8e-06 OVERLAP:[Serine/threonine phosphoprotein phosphatase] <450> SIZE:6                                                                                                                                                                                                                                                                                                                                                                                                                                                |
| YOR054C        | [VHS3] Functionally redundant (see also SIS2) inhibitory subunit of Ppz1p, a PP1c-related ser/thr protein phosphatase Z isoform; synthetically lethal with sis2; putative phosphopantothenoylcysteine decarboxylase involved in coenzyme A biosynthesis                                                                                                                                                                                                                                                                                                                             |
| YML016C        | [PPZ1] Serine/threonine protein phosphatase Z, isoform of Ppz2p; involved in regulation of potassium transport, which affects osmotic stability, cell cycle progression, and halotolerance Null mutant is viable, exhibits increased tolerance to Na+ and Li+ cations, increased cell size and lysis; ppz1 ppz2 double deletion mutants exhibit a temperature sensitive cell lysis defect and fail to grow in the presence of 5 mM caffeine                                                                                                                                         |
| YDR436W        | [PPZ2] Serine/threonine protein phosphatase Z, isoform of Ppz1p; involved in regulation of potassium transport, which affects osmotic stability, cell cycle progression, and halotolerance Null mutant is viable but shows increase in cell size and cell lysis (remediated by 1 M sorbitol); ppz1 ppz2 double mutant shows increased expression of ENA1, resistance to sodium and lithium, and sensitivity to 5 mM caffeine (which is suppressed by 1 M sorbitol)                                                                                                                  |
| <b>YMR311C</b> | [GLC8] Regulatory subunit of protein phosphatase 1 (Glc7p), involved in glycogen metabolism and chromosome segregation; proposed to regulate Glc7p activity via conformational alteration; ortholog of the mammalian protein phosphatase inhibitor 2 protein phosphatase 1 (Glc7p) regulator                                                                                                                                                                                                                                                                                        |
| 0720           | GO_TERM:[molecular_function] P-Value:2.3e-01                                                                                                                                                                                                                                                                                                                                                                                                                                                                                                                                        |
| YER076C        |                                                                                                                                                                                                                                                                                                                                                                                                                                                                                                                                                                                     |
| YEL011W        | [GLC3] Glycogen branching enzyme, involved in glycogen accumulation; green fluorescent protein (GFP)-fusion protein localizes to the cytoplasm in a punctate pattern 1,4-glucan-6-(1,4-glucano)-transferase Null mutant is viable, glycogen deficient                                                                                                                                                                                                                                                                                                                               |
| YPL097W        | [MSY1] Mitochondrial tyrosyl-tRNA synthetase tyrosine-tRNA ligase                                                                                                                                                                                                                                                                                                                                                                                                                                                                                                                   |
| YOR271C        |                                                                                                                                                                                                                                                                                                                                                                                                                                                                                                                                                                                     |

|                |                                                                                                                                                                                                                                                                                                                                                                                                                                                                                             |
|----------------|---------------------------------------------------------------------------------------------------------------------------------------------------------------------------------------------------------------------------------------------------------------------------------------------------------------------------------------------------------------------------------------------------------------------------------------------------------------------------------------------|
| YJL079C        | [PRY1] Protein of unknown function, has similarity to Pry2p and Pry3p and to the plant PR-1 class of pathogen related proteins                                                                                                                                                                                                                                                                                                                                                              |
| YPR157W        |                                                                                                                                                                                                                                                                                                                                                                                                                                                                                             |
| YKL208W        | [CBT1] Protein involved in 5' end processing of mitochondrial COB, 15S_rRNA, and RPM1 transcripts; may also have a role in 3' end processing of the COB pre-mRNA; displays genetic interaction with cell cycle-regulated kinase Dbf2p                                                                                                                                                                                                                                                       |
| YGR053C        |                                                                                                                                                                                                                                                                                                                                                                                                                                                                                             |
| YPR086W        | [SUA7] Transcription factor TFIIB, a general transcription factor required for transcription initiation and start site selection by RNA polymerase II transcription factor TFIIB homolog                                                                                                                                                                                                                                                                                                    |
| 0721           | GO_TERM:[regulation of translational fidelity] P-Value:2.1e-04 OVERLAP:[cytoplasmic ribosomal small subunit] <500.40.20> SIZE:57                                                                                                                                                                                                                                                                                                                                                            |
| <b>YGR118W</b> | [RPS23A] Ribosomal protein 28 (rp28) of the small (40S) ribosomal subunit, required for translational accuracy; nearly identical to Rps23Bp and similar to E. coli S12 and rat S23 ribosomal proteins; deletion of both RPS23A and RPS23B is lethal ribosomal protein S23A (S28A) (rp37) (YS14) Null mutant is viable; rps23a rps23b double deletion mutants are inviable. Mutations in different parts of RPS23 have opposite affects on translational accuracy or antibiotic sensitivity. |
| YDR079C-A      | [TFB5] Component of the RNA polymerase II general transcription and DNA repair factor TFIIH; involved in transcription initiation; homolog of the Chlamydomonas reinhardtii REX1-S protein which is involved in DNA repair transcription initiation/DNA repair factor TFIIH subunit                                                                                                                                                                                                         |
| <b>YPR132W</b> | [RPS23B] Ribosomal protein 28 (rp28) of the small (40S) ribosomal subunit, required for translational accuracy; nearly identical to Rps23Ap and similar to E. coli S12 and rat S23 ribosomal proteins; deletion of both RPS23A and RPS23B is lethal ribosomal protein S23B (S28B) (rp37) (YS14) Null mutant is viable, rps23a rps23b double deletion mutants are inviable. Mutations in different parts of RPS23 have opposite affects on translational accuracy or antibiotic sensitivity. |
| 0722           | GO_TERM:[nuclear pore] P-Value:1.3e-03                                                                                                                                                                                                                                                                                                                                                                                                                                                      |
| YMR255W        | [GFD1] Coiled-coiled protein of unknown function, identified as a high-copy suppressor of a dbp5 mutation Null mutant is viable; high copy suppressor of rat8-2                                                                                                                                                                                                                                                                                                                             |
| YOR046C        | [DBP5] Cytoplasmic ATP-dependent RNA helicase of the DEAD-box family involved in mRNA export from the nucleus RNA helicase dbp5(ts) strains exhibit rapid, synchronous accumulation of poly(A)+ RNA in nuclei when shifted to the non-permissive temperature                                                                                                                                                                                                                                |
| 0723           | GO_TERM:[transcription factor TFIIH complex] P-Value:1.6e-26 OVERLAP:[NEF3 complex] <510.180.10.30> SIZE:9                                                                                                                                                                                                                                                                                                                                                                                  |
| <b>YGR258C</b> | [RAD2] Single-stranded DNA endonuclease, cleaves single-stranded DNA during nucleotide excision repair to excise damaged DNA; subunit of Nucleotide Excision Repair Factor 3 (NEF3); homolog of human XPG protein xeroderma pigmentosum group G (XPG) protein homolog Null mutant is viable, radiation sensitive                                                                                                                                                                            |
| <b>YIL143C</b> | [SSL2] Component of the holoenzyme form of RNA polymerase transcription factor TFIIH, has DNA-dependent ATPase/helicase activity and is required, with Rad3p, for unwinding promoter DNA; involved in DNA repair; homolog of human ERCC3 DNA helicase/human XPBC, ERCC3 homolog                                                                                                                                                                                                             |
| <b>YPL122C</b> | [TFB2] Subunit of TFIIH and nucleotide excision repair factor 3 complexes, involved in transcription initiation, required for nucleotide excision repair, similar to 52 kDa subunit of human TFIIH TFIIH subunit Null mutant is inviable; a c-terminal deletion mutant is associated with defects in nucleotide excision repair (as demonstrated by UV sensitivity                                                                                                                          |
| <b>YER171W</b> | [RAD3] 5' to 3' DNA helicase, involved in nucleotide excision repair and transcription; subunit of RNA polymerase II transcription initiation factor TFIIH; subunit of Nucleotide Excision Repair Factor 3 (NEF3); homolog of human XPD protein Null mutant is inviable; rad3 mutants are radiation sensitive Deletion of this nucleotide excision repair (NER) gene results in lower levels of cross-link-induced recombination but higher mutation frequencies than wild-type cells.      |
| <b>YDR311W</b> | [TFB1] Subunit of TFIIH and nucleotide excision repair factor 3 complexes, required for nucleotide excision repair, target for transcriptional activators transcription initiation factor Iib, 75 kDa subunit component                                                                                                                                                                                                                                                                     |
| <b>YDL108W</b> | [KIN28] Serine/threonine protein kinase, subunit of the transcription factor TFIIH; involved in transcription initiation at RNA polymerase II promoters                                                                                                                                                                                                                                                                                                                                     |
| <b>YPR025C</b> | [CCL1] Cyclin associated with protein kinase Kin28p, which is the TFIIH-associated carboxy-terminal domain (CTD) kinase involved in transcription initiation at RNA polymerase II promoters TFIIK subunit, a subcomplex of transcription factor TFIIH cyclin                                                                                                                                                                                                                                |
| YPR056W        | [TFB4] Subunit of TFIIH complex, involved in transcription initiation, similar to 34 kDa subunit of human TFIIH; interacts with Ssl1p transcription initiation factor TFIIH subunit                                                                                                                                                                                                                                                                                                         |
| <b>YDR460W</b> | [TFB3] Subunit of TFIIH and nucleotide excision repair factor 3 complexes, involved in transcription initiation, required for nucleotide excision repair; ring finger protein similar to mammalian CAK and TFIIH subunit TFIIH subunit                                                                                                                                                                                                                                                      |
| <b>YLR005W</b> | [SSL1] Component of the core form of RNA polymerase transcription factor TFIIH, which has both protein kinase and DNA-dependent ATPase/helicase activities and is essential for transcription and nucleotide excision repair; interacts with Tfb4p RNA polymerase transcription factor TFIIH component Null mutant is inviable; temperature-sensitive mutants are UV-sensitive and deficient in nucleotide excision repair.                                                                 |
| 0724           | GO_TERM:[nucleosome] P-Value:1.7e-03                                                                                                                                                                                                                                                                                                                                                                                                                                                        |
| YNL234W        |                                                                                                                                                                                                                                                                                                                                                                                                                                                                                             |

|                |                                                                                                                                                                                                                                                                                                                                                                                                                                                                                                                                                                   |
|----------------|-------------------------------------------------------------------------------------------------------------------------------------------------------------------------------------------------------------------------------------------------------------------------------------------------------------------------------------------------------------------------------------------------------------------------------------------------------------------------------------------------------------------------------------------------------------------|
| YBR274W        | [CHK1] DNA damage checkpoint effector kinase, mediates mitotic cell cycle arrest via phosphorylation of Pds1p; phosphorylated by checkpoint signal transducer kinase Mec1p; homolog of <i>S. pombe</i> and mammalian Chk1 checkpoint kinase protein kinase Mutants are defective in the DNA damage checkpoint operating at metaphase                                                                                                                                                                                                                              |
| YLR152C        |                                                                                                                                                                                                                                                                                                                                                                                                                                                                                                                                                                   |
| YGR270W        | [YTA7] Protein of unknown function, member of CDC48/PAS1/SEC18 family of ATPases, potentially phosphorylated by Cdc28p                                                                                                                                                                                                                                                                                                                                                                                                                                            |
| YOR064C        | [YNG1] Subunit of the NuA3 histone acetyltransferase complex that acetylates histone H3; has similarity to the human tumor suppressor ING1 histone acetyltransferase complex component carbon source sensitive, heat shock sensitive                                                                                                                                                                                                                                                                                                                              |
| YBL052C        | [SAS3] Histone acetyltransferase catalytic subunit of NuA3 complex that acetylates histone H3, involved in transcriptional silencing; homolog of the mammalian MOZ proto-oncogene; sas3 gcn5 double mutation confers lethality                                                                                                                                                                                                                                                                                                                                    |
| YPR031W        | [NTO1] Component of the histone acetyltransferase complex HAT complex component Null: viable. Other phenotypes: require for NuA3 complex integrity                                                                                                                                                                                                                                                                                                                                                                                                                |
| 0725           | GO_TERM:[mRNA capping] P-Value:1.0e-05 OVERLAP:[mRNA guanylyl transferase (capping complex)] <510.170> SIZE:2                                                                                                                                                                                                                                                                                                                                                                                                                                                     |
| YER155C        | [BEM2] Rho GTPase activating protein (RhoGAP) involved in the control of cytoskeleton organization and cellular morphogenesis; required for bud emergence rho GTPase activating protein (GAP) randomized bud-site selection at 26 degrees C and defective bud emergence and growth at 37 degrees C                                                                                                                                                                                                                                                                |
| YOR375C        | [GDH1] NADP(+)-dependent glutamate dehydrogenase, synthesizes glutamate from ammonia and alpha-ketoglutarate; rate of alpha-ketoglutarate utilization differs from Gdh3p; expression regulated by nitrogen and carbon sources NADP-specific glutamate dehydrogenase                                                                                                                                                                                                                                                                                               |
| <b>YGL130W</b> | [CEG1] Alpha (guanylyltransferase) subunit of the mRNA capping enzyme, a heterodimer (the other subunit is CET1, an RNA 5'-triphosphatase) involved in adding the 5' cap to mRNA; the mammalian enzyme is a single bifunctional polypeptide mRNA capping enzyme alpha subunit mRNA guanylyltransferase                                                                                                                                                                                                                                                            |
| <b>YPL228W</b> | [CET1] Beta (RNA 5'-triphosphatase) subunit of the mRNA capping enzyme, a heterodimer (the other subunit is CEG1, a guanylyltransferase) involved in adding the 5' cap to mRNA; the mammalian enzyme is a single bifunctional polypeptide RNA 5'-triphosphatase mRNA capping enzyme beta subunit (80 kDa)                                                                                                                                                                                                                                                         |
| 0726           | GO_TERM:[fatty acid oxidation] P-Value:2.1e-05                                                                                                                                                                                                                                                                                                                                                                                                                                                                                                                    |
| YDL078C        | [MDH3] Cytoplasmic malate dehydrogenase, catalyzes interconversion of malate and oxaloacetate; involved in the glyoxylate cycle malate dehydrogenase Null mutant is viable, does not grow on oleate and grows slowly on acetate                                                                                                                                                                                                                                                                                                                                   |
| YOL147C        | [PEX11] Peroxisomal membrane protein required for peroxisome proliferation and medium-chain fatty acid oxidation, most abundant protein in the peroxisomal membrane, regulated by Adr1p and Pip2p-Oaf1p, promoter contains ORE and UAS1-like elements peroxin peroxisomal membrane protein                                                                                                                                                                                                                                                                        |
| 0727           | GO_TERM:[transcription factor TFIIB complex] P-Value:6.9e-06 OVERLAP:[TFIIB] <510.140> SIZE:3                                                                                                                                                                                                                                                                                                                                                                                                                                                                     |
| YGL250W        |                                                                                                                                                                                                                                                                                                                                                                                                                                                                                                                                                                   |
| <b>YGR246C</b> | [BRF1] TFIIB B-related factor, one of three subunits of RNA polymerase III transcription initiation factor TFIIB, binds TFIIC and TBP and recruits RNA pol III to promoters, amino-terminal half is homologous to TFIIB RNA polymerase III transcription factor similar to TFIIB                                                                                                                                                                                                                                                                                  |
| <b>YNL039W</b> | [BDP1] Essential subunit of RNA polymerase III transcription factor (TFIIB), which is involved in transcription of genes encoding tRNAs, 5S rRNA, U6 snRNA, and other small RNAs TFIIB 90 kDa subunit Null mutant is inviable; tfc5 mutant suppresses mutations in the class III transcription system                                                                                                                                                                                                                                                             |
| 0728           | GO_TERM:[regulation of transcription] P-Value:2.4e-04 OVERLAP:[Tup1/Ssn6 complex] <510.190.140> SIZE:2                                                                                                                                                                                                                                                                                                                                                                                                                                                            |
| YNL167C        | [SKO1] Basic leucine zipper (bZIP) transcription factor of the ATF/CREB family that forms a complex with Tup1p and Ssn6p to both activate and repress transcription; cytosolic and nuclear protein involved in the osmotic and oxidative stress responses Null mutant is viable, associated with partial derepression of the SUC2 gene; associated with increased transcription through ATF/CREB sites. SKO1 is a multicopy suppressor of the lethality caused by overexpressing cAMP-dependent protein kinase and of the toxicity caused by overexpressing Rap1p |
| YGL162W        | [SUT1] Transcription factor of the Zn[II]2Cys6 family involved in sterol uptake; involved in induction of hypoxic gene expression                                                                                                                                                                                                                                                                                                                                                                                                                                 |
| <b>YBR112C</b> | [CYC8] General transcriptional co-repressor, acts together with Tup1p; also acts as part of a transcriptional co-activator complex that recruits the SWI/SNF and SAGA complexes to promoters Null mutant is viable; high level constitutivity for invertase, clumpiness, temperature-sensitive growth, alpha-specific mating defects and failure of homozygous diploids to sporulate                                                                                                                                                                              |
| YPR068C        | [HOS1] Putative class I histone deacetylase (HDAC) with sequence similarity to Hda1p, Rpd3p, Hos2p, and Hos3p; deletion results in increased histone acetylation at rDNA repeats; interacts with the Tup1p-Ssn6p corepressor complex                                                                                                                                                                                                                                                                                                                              |
| 0729           | GO_TERM:[transcription factor TFIIE complex] P-Value:8.1e-07 OVERLAP:[TFIIE] <510.80> SIZE:2                                                                                                                                                                                                                                                                                                                                                                                                                                                                      |
| <b>YKL028W</b> | [TFA1] TFIIE large subunit, involved in recruitment of RNA polymerase II to the promoter, activation of TFIIF, and promoter opening transcription factor tFIIE large subunit                                                                                                                                                                                                                                                                                                                                                                                      |
| <b>YKR062W</b> | [TFA2] TFIIE small subunit, involved in RNA polymerase II transcription initiation transcription factor TFIIE subunit                                                                                                                                                                                                                                                                                                                                                                                                                                             |

|                         |                                                                                                                                                                                                                                                                                                                                                                                                                                                                                                                                                                                                                                                                                                           |
|-------------------------|-----------------------------------------------------------------------------------------------------------------------------------------------------------------------------------------------------------------------------------------------------------------------------------------------------------------------------------------------------------------------------------------------------------------------------------------------------------------------------------------------------------------------------------------------------------------------------------------------------------------------------------------------------------------------------------------------------------|
| 0730                    | GO_TERM:[RNA polymerase II transcription mediator activity] P-Value:1.2e-51 OVERLAP:[Kornberg's mediator (SRB) complex] <510.40.20> SIZE:21                                                                                                                                                                                                                                                                                                                                                                                                                                                                                                                                                               |
| YOR140W                 | [SFL1] Transcription repressor involved in regulation of flocculation-related genes, inhibits transcription by recruiting general corepressor Cyc8p-Tup1p to different promoters; negatively regulated by cAMP-dependent protein kinase A subunit Tpk2p transcription factor                                                                                                                                                                                                                                                                                                                                                                                                                              |
| YCR084C                 | [TUP1] General repressor of transcription, forms complex with Cyc8p, involved in the establishment of repressive chromatin structure through interactions with histones H3 and H4, appears to enhance expression of some genes Null mutant is viable; exhibits flocculent colony morphology                                                                                                                                                                                                                                                                                                                                                                                                               |
| YPL248C                 | [GAL4] DNA-binding transcription factor required for the activation of the GAL genes in response to galactose; repressed by Gal80p and activated by Gal3p zinc finger transcription factor of the Zn(2)-Cys(6) binuclear cluster domain type Null mutant is viable, cannot utilize galactose as sole carbon source                                                                                                                                                                                                                                                                                                                                                                                        |
| YNL025C                 | [SSN8] Cyclin-like component of the RNA polymerase II holoenzyme, involved in phosphorylation of the RNA polymerase II C-terminal domain; involved in glucose repression and telomere maintenance C-type cyclin associates with the Ssn3p cyclin-dependent kinase null is viable, exhibits set of phenotypes common to strains defective in SSN6/TUP1-mediated transcriptional repression. Other mutations show unscheduled meiotic gene expression (derepression of early meiotic genes), suppression of SNF1.                                                                                                                                                                                           |
| YPL042C                 | [SSN3] Cyclin-dependent protein kinase, component of RNA polymerase II holoenzyme; involved in phosphorylation of the RNA polymerase II C-terminal domain; involved in glucose repression cyclin (SSN8)-dependent serine/threonine protein kinase null is viable, exhibits set of phenotypes common to strains defective in SSN6/TUP1-mediated transcriptional repression. Other mutations show unscheduled meiotic gene expression (derepression of early meiotic genes), suppression of SNF1.                                                                                                                                                                                                           |
| YDR443C                 | [SSN2] Protein required for stable association of Srb10p-Srb11p kinase with RNA polymerase holoenzyme; subunit of the RNA polymerase II mediator complex; essential for transcriptional regulation transcription factor Null mutant is viable; ssn2 mutations can suppress CTD truncations or phosphorylation mutants and snf1 mutations                                                                                                                                                                                                                                                                                                                                                                  |
| YGL127C                 | [SOH1] Subunit of the RNA polymerase II mediator complex; associates with core polymerase subunits to form the RNA polymerase II holoenzyme; involved in telomere maintenance; conserved with other metazoan MED31 subunits Null mutant is viable, shows 10-fold increase in recombination. soh1 mutants were originally identified as suppressors of hyperrecombination hpr1 mutants. Soh1p may functionally interact with components of the RNA polymerase II complex as suggested from the synthetic lethality observed in soh1 rpb delta 104, soh1 rpb2, and soh1 sua7 double mutants.                                                                                                                |
| <a href="#">YPL129W</a> | [TAF14] Subunit (30 kDa) of TFIID, TFIIF, and SWI/SNF complexes, involved in RNA polymerase II transcription initiation and in chromatin modification, contains a YEATS domain transcription initiation factor TFIIF small subunit Null mutant is viable but has a depolarized actin cytoskeleton.                                                                                                                                                                                                                                                                                                                                                                                                        |
| <a href="#">YER022W</a> | [SRB4] Subunit of the RNA polymerase II mediator complex; associates with core polymerase subunits to form the RNA polymerase II holoenzyme; essential for transcriptional regulation RNA polymerase II holoenzyme/mediator subunit Null mutant is inviable, srb4 (ts) mutants display global defects in mRNA synthesis; srb4 mutants are suppressed by mutations in NCBI                                                                                                                                                                                                                                                                                                                                 |
| YCR081W                 | [SRB8] Subunit of the RNA polymerase II mediator complex; associates with core polymerase subunits to form the RNA polymerase II holoenzyme; essential for transcriptional regulation; involved in glucose repression                                                                                                                                                                                                                                                                                                                                                                                                                                                                                     |
| <a href="#">YMR112C</a> | [MED11] Subunit of the RNA polymerase II mediator complex; associates with core polymerase subunits to form the RNA polymerase II holoenzyme RNA polymerase II holoenzyme/mediator subunit 14 kDa                                                                                                                                                                                                                                                                                                                                                                                                                                                                                                         |
| <a href="#">YNL236W</a> | [SIN4] Subunit of the Mediator complex; interacts with the RNA polymerase II holoenzyme to positively or negatively regulate transcription; dispensible for basal transcription RNA polymerase II holoenzyme/mediator subunit Null mutant is viable, temperature sensitive, displays defects in both positive and negative regulation of transcription, suppresses Ty insertion mutations (Spt-), exhibits decreased superhelical density of circular DNA molecules, exhibits expression from promoters lacking UAS elements; associated with a defect in RME1-dependent repression and a methionine or cysteine requirement, exhibits flocculent/lacy colony morphology, suppressor of snf/swi mutations |
| <a href="#">YHR041C</a> | [SRB2] General transcription factor, subunit of the RNA polymerase II mediator complex; associates with core polymerase subunits to form the RNA polymerase II holoenzyme; involved in telomere maintenance RNA polymerase II holoenzyme/mediator subunit Null mutant is viable, the semi-dominant SRB2-1 mutation suppresses truncation of the C-terminal domain of RNA polymerase II                                                                                                                                                                                                                                                                                                                    |
| <a href="#">YGR104C</a> | [SRB5] Subunit of the RNA polymerase II mediator complex; associates with core polymerase subunits to form the RNA polymerase II holoenzyme; essential for transcriptional regulation; involved in telomere maintenance RNA polymerase II holoenzyme/mediator subunit                                                                                                                                                                                                                                                                                                                                                                                                                                     |
| <a href="#">YOL051W</a> | [GAL11] Component of the Mediator complex; interacts with RNA polymerase II and the general transcription factors to form the RNA polymerase II holoenzyme; affects transcription by acting as target of activators and repressors RNA polymerase II holoenzyme complex component positive and negative transcriptional regulator of genes involved in mating-type specialization Null mutant is viable, exhibits reduced expression of Gal4 regulated genes                                                                                                                                                                                                                                              |
| <a href="#">YOR174W</a> | [MED4] Subunit of the RNA polymerase II mediator complex; associates with core polymerase subunits to form the RNA polymerase II holoenzyme; essential for transcriptional regulation RNA polymerase II holoenzyme/mediator subunit                                                                                                                                                                                                                                                                                                                                                                                                                                                                       |
| <a href="#">YBR193C</a> | [MED8] Subunit of the RNA polymerase II mediator complex; associates with core polymerase subunits to form the RNA polymerase II holoenzyme; essential for transcriptional regulation RNA polymerase II holoenzyme/mediator subunit                                                                                                                                                                                                                                                                                                                                                                                                                                                                       |
| <a href="#">YOL135C</a> | [MED7] Subunit of the RNA polymerase II mediator complex; associates with core polymerase subunits to form the RNA polymerase II holoenzyme; essential for transcriptional regulation RNA polymerase II holoenzyme/mediator subunit                                                                                                                                                                                                                                                                                                                                                                                                                                                                       |
| <a href="#">YBR253W</a> | [SRB6] Subunit of the RNA polymerase II mediator complex; associates with core polymerase subunits to form the RNA polymerase II holoenzyme; essential for transcriptional regulation part of Srb/Mediator complex transcription factor Null mutant is inviable; temperature sensitive mutants are associated with decreased total polyA+ RNA levels                                                                                                                                                                                                                                                                                                                                                      |
| <a href="#">YGL025C</a> | [PGD1] Subunit of the Mediator global transcriptional cofactor complex, which is part of the RNA polymerase II holoenzyme and plays an essential role in basal and activated transcription; direct target of the Cyc8p-Tup1p transcriptional corepressor Suppresses hyper-deletion phenotype of hpr1 null mutant; reduces frequency of deletions in rad52-1 mutant                                                                                                                                                                                                                                                                                                                                        |
| <a href="#">YLR071C</a> | [RGR1] Component of RNA polymerase II holoenzyme/mediator complex; affects chromatin structure and transcriptional regulation of diverse genes; required for glucose repression, HO repression, RME1 repression and sporulation RNA polymerase II holoenzyme/mediator subunit interacts with Sin4p, Gal1p, and a 50 kDa polypeptide Null mutant is inviable, rgr1 mutants exhibit resistance to glucose repression, temperature sensitivity, sporulation; rgr1-ts allows sporulation of a/a diploids overexpressing RME1                                                                                                                                                                                  |
| <a href="#">YHR058C</a> | [MED6] Subunit of the RNA polymerase II mediator complex; associates with core polymerase subunits to form the RNA polymerase II holoenzyme; essential for transcriptional regulation                                                                                                                                                                                                                                                                                                                                                                                                                                                                                                                     |
| <a href="#">YNR010W</a> | [CSE2] Component of the Med9/10 module, which is a subcomplex within the RNA polymerase II Mediator complex; required for regulation of RNA polymerase II activity RNA polymerase II mediator subcomplex component Null mutant is viable, accumulates large-budded cells, results in significant increase in chromosome missegregation, slower growth, and defective meiosis                                                                                                                                                                                                                                                                                                                              |

|                |                                                                                                                                                                                                                                                                                                                                                    |
|----------------|----------------------------------------------------------------------------------------------------------------------------------------------------------------------------------------------------------------------------------------------------------------------------------------------------------------------------------------------------|
| <b>YPR168W</b> | [NUT2] Component of the RNA polymerase II mediator complex, which is required for transcriptional activation and also has a role in basal transcription RNA polymerase II holoenzyme 21 kDa mediator subunit Null mutant is inviable, nut2-1 perturbs repression of URS2                                                                           |
| <b>YBL093C</b> | [ROX3] RNA polymerase II holoenzyme component RNA polymerase II holoenzyme/mediator subunit                                                                                                                                                                                                                                                        |
| <b>YDR308C</b> | [SRB7] Subunit of the RNA polymerase II mediator complex; associates with core polymerase subunits to form the RNA polymerase II holoenzyme; essential for transcriptional regulation; target of the global repressor Tup1p RNA polymerase II holoenzyme/mediator subunit                                                                          |
| <b>YDL005C</b> | [MED2] Subunit of the RNA polymerase II mediator complex; associates with core polymerase subunits to form the RNA polymerase II holoenzyme; essential for transcriptional regulation RNA polymerase II holoenzyme/mediator subunit Null mutant is viable, unable to grow on galactose                                                             |
| <b>YGL151W</b> | [NUT1] Component of the RNA polymerase II mediator complex, which is required for transcriptional activation and also has a role in basal transcription Null mutant is viable, deletion of NUT1 causes a constitutive, Swi4p-independent phenotype in combination with the nut2-1 allele or an allele of CCR4                                      |
| YPR070W        | [MED1] Subunit of the RNA polymerase II mediator complex; associates with core polymerase subunits to form the RNA polymerase II holoenzyme; essential for transcriptional regulation essential for transcriptional regulation mediator complex subunit 1 Defects in both repression and induction of GAL genes; supresses loss of the Snf1 kinase |
| 0731           | GO_TERM:[nucleoplasm part] P-Value:3.1e-02                                                                                                                                                                                                                                                                                                         |
| YBR236C        | [ABD1] Methyltransferase, catalyzes the transfer of a methyl group from S-adenosylmethionine to the GpppN terminus of capped mRNA RNA (guanine-7-)methyltransferase (cap methyltransferase)                                                                                                                                                        |
| YGR116W        | [SPT6] Essential protein that interacts with histones and is involved in nucleosome disassembly and reassembly during transcription elongation interacts with histones, primarily histone H3, possesses nucleosome assembly activity transcriptional regulator                                                                                     |
| 0732           | GO_TERM:[DNA-directed RNA polymerase III complex] P-Value:5.0e-32 OVERLAP:[RNA polymerase III] <510.120> SIZE:13                                                                                                                                                                                                                                   |
| YDR045C        | [RPC11] RNA polymerase III subunit C11; mediates pol III RNA cleavage activity and is important for termination of transcription TFIIIS-like small Pol III subunit C11                                                                                                                                                                             |
| YDR005C        | [MAF1] Negative regulator of RNA polymerase III; component of several signaling pathways that repress polymerase III transcription in response to changes in cellular environment; targets the initiation factor TFIIIB Mislocalizes Mod5p to the nucleus. tRNA levels are elevated in maf1 mutant cells.                                          |
| <b>YPR110C</b> | [RPC40] RNA polymerase subunit, common to RNA polymerase I and III RNA polymerase III subunit                                                                                                                                                                                                                                                      |
| <b>YNL113W</b> | [RPC19] RNA polymerase subunit, common to RNA polymerases I and III RNA polymerases I (A) and III (C) subunit                                                                                                                                                                                                                                      |
| YKR025W        | [RPC37] RNA polymerase III subunit C37 RNA polymerase III subunit                                                                                                                                                                                                                                                                                  |
| YJL011C        | [RPC17] RNA polymerase III subunit C17; physically interacts with C31, C11, and TFIIIB70; may be involved in the recruitment of pol III by the preinitiation complex                                                                                                                                                                               |
| <b>YOR207C</b> | [RET1] Second-largest subunit of RNA polymerase III, which is responsible for the transcription of tRNA and 5S RNA genes, and other low molecular weight RNAs                                                                                                                                                                                      |
| <b>YOR116C</b> | [RPO31] RNA polymerase III subunit C160, part of core enzyme; similar to bacterial beta-prime subunit RNA polymerase III subunit                                                                                                                                                                                                                   |
| <b>YNR003C</b> | [RPC34] RNA polymerase III subunit C34; interacts with TFIIIB70 and is a key determinant in pol III recruitment by the preinitiation complex RNA polymerase III (C) 34 kDa subunit                                                                                                                                                                 |
| <b>YKL144C</b> | [RPC25] RNA polymerase III subunit C25 RNA polymerase III subunit                                                                                                                                                                                                                                                                                  |
| YDL150W        | [RPC53] RNA polymerase III subunit C53 RNA polymerase III subunit Null mutant is inviable; temperature sensitive mutants show rapid inhibition of tRNA synthesis after shift to restrictive temperature and arrest in G1                                                                                                                           |
| <b>YNL151C</b> | [RPC31] RNA polymerase III subunit C31; contains HMG-like C-terminal domain HMG1-like protein RNA polymerase III (C) 31 kDa subunit                                                                                                                                                                                                                |
| <b>YPR190C</b> | [RPC82] RNA polymerase III subunit C82 82 kDa subunit of RNA polymerase III (C)                                                                                                                                                                                                                                                                    |
| 0733           | GO_TERM:[RNA polymerase complex] P-Value:2.3e-39 OVERLAP:[RNA polymerase II] <510.40.10> SIZE:13                                                                                                                                                                                                                                                   |
| YPR010C        | [RPA135] RNA polymerase I subunit A135 RNA polymerase I subunit suppression of rpb1, cold sensitive                                                                                                                                                                                                                                                |
| YJR063W        | [RPA12] RNA polymerase I subunit A12.2; contains two zinc binding domains, and the N terminal domain is responsible for anchoring to the RNA pol I complex RNA polymerase I A12.2 subunit Null mutant is viable but is temperature sensitive; synthetically lethal with RPA14                                                                      |
| YNL248C        | [RPA49] RNA polymerase I subunit A49 RNA polymerase A 49 kDa alpha subunit Null mutant is viable but grows slowly and is temperature or cold sensitive; synthetically lethal with RPA14                                                                                                                                                            |
| YOR341W        | [RPA190] RNA polymerase I subunit; largest subunit of RNA polymerase I RNA polymerase I subunit                                                                                                                                                                                                                                                    |
| YDR156W        | [RPA14] RNA polymerase I subunit A14 RNA polymerase I subunit Null mutant is viable but is temperature sensitive                                                                                                                                                                                                                                   |
| YJL148W        | [RPA34] RNA polymerase I subunit A34.5 Null mutant is viable but its RNA polymerase I lacks subunit A49 (rpa49p); synthetically lethal with RPA14; shows synthetic interactions with DNA topoisomerase I (TPO1)                                                                                                                                    |
| YOR340C        | [RPA43] RNA polymerase I subunit A43 DNA dependent RNA polymerase I subunit A43                                                                                                                                                                                                                                                                    |
| YGR063C        | [SPT4] Protein that forms a complex with Spt5p and mediates both activation and inhibition of transcription elongation, and plays a role in pre-mRNA processing; in addition, Spt4p is involved in kinetochore function and gene silencing transcriptional regulator zinc finger protein                                                           |

|                |                                                                                                                                                                                                                                                                                                                                                                                                                                                                                 |
|----------------|---------------------------------------------------------------------------------------------------------------------------------------------------------------------------------------------------------------------------------------------------------------------------------------------------------------------------------------------------------------------------------------------------------------------------------------------------------------------------------|
| YML010W        | [SPT5] Protein that forms a complex with Spt4p and mediates both activation and inhibition of transcription elongation; Spt4p-Spt5p complex also plays a role in pre-mRNA processing transcription factor                                                                                                                                                                                                                                                                       |
| YJL168C        | [SET2] Histone methyltransferase with a role in transcriptional elongation, methylates a lysine residue of histone H3; associates with the C-terminal domain of Rpo21p; histone methylation activity is regulated by phosphorylation status of Rpo21p null is viable; a point mutant suppresses deletion of the UAS in the GAL4 promoter                                                                                                                                        |
| <b>YDL140C</b> | [RPO21] RNA polymerase II largest subunit B220, part of central core; phosphorylation of C-terminal heptapeptide repeat domain regulates association with transcription and splicing factors; similar to bacterial beta-prime RNA polymerase II core subunit                                                                                                                                                                                                                    |
| <b>YOR224C</b> | [RPB8] RNA polymerase subunit ABC14.5, common to RNA polymerases I, II, and III 16 kDa RNA polymerase subunit (common to polymerases I, II and III)                                                                                                                                                                                                                                                                                                                             |
| YDL115C        | [IWR1] Protein of unknown function, deletion causes hypersensitivity to the K1 killer toxin                                                                                                                                                                                                                                                                                                                                                                                     |
| <b>YOR210W</b> | [RPB10] RNA polymerase subunit ABC10-beta, common to RNA polymerases I, II, and III RNA polymerase II core subunit                                                                                                                                                                                                                                                                                                                                                              |
| <b>YGL070C</b> | [RPB9] RNA polymerase II subunit B12.6; contacts DNA; mutations affect transcription start site; involved in telomere maintenance RNA polymerase II core subunit Null mutant is viable, heat and cold sensitive, exhibits altered transcription start sites at various genes                                                                                                                                                                                                    |
| YGR186W        | [TFG1] TFIIF (Transcription Factor II) largest subunit; involved in both transcription initiation and elongation of RNA polymerase II; homologous to human RAP74 transcription factor TFIIF large subunit Mutating the Fcp1p-binding motif KEFGK in Tfg1p to EEFGK led to both synthetic phenotypes in certain fcp1tfg1 double mutants and a reduced ability of Fcp1p to activate transcription when it is artificially tethered to a promoter.                                 |
| <b>YPR187W</b> | [RPO26] RNA polymerase subunit ABC23, common to RNA polymerases I, II, and III; part of central core; similar to bacterial omega subunit RNA polymerases I, II, and III subunit                                                                                                                                                                                                                                                                                                 |
| YGR005C        | [TFG2] TFIIF (Transcription Factor II) middle subunit; involved in both transcription initiation and elongation of RNA polymerase II; homologous to human RAP30 transcription initiation factor TFIIF middle subunit                                                                                                                                                                                                                                                            |
| <b>YBR154C</b> | [RPB5] RNA polymerase subunit ABC27, common to RNA polymerases I, II, and III; contacts DNA and affects transactivation 25 kDa RNA polymerase subunit (common to polymerases I, II and III)                                                                                                                                                                                                                                                                                     |
| <b>YOR151C</b> | [RPB2] RNA polymerase II second largest subunit B150, part of central core; similar to bacterial beta subunit                                                                                                                                                                                                                                                                                                                                                                   |
| <b>YIL021W</b> | [RPB3] RNA polymerase II third largest subunit B44, part of central core; similar to prokaryotic alpha subunit RNA polymerase II 45 kDa subunit Null mutant is inviable; rpb3(ts) mutants at restrictive temperature exhibit no assembly of RNA polymerase II                                                                                                                                                                                                                   |
| <b>YOL005C</b> | [RPB11] RNA polymerase II subunit B12.5; part of central core; similar to Rpc19p and bacterial alpha subunit RNA polymerase II core subunit                                                                                                                                                                                                                                                                                                                                     |
| <b>YDR404C</b> | [RPB7] RNA polymerase II subunit B16; forms two subunit dissociable complex with Rpb4p RNA polymerase II dissociable subunit                                                                                                                                                                                                                                                                                                                                                    |
| <b>YJL140W</b> | [RPB4] RNA polymerase II subunit B32; forms two subunit dissociable complex with Rpb7p; dispensable under some environmental conditions; involved in export of mRNA to cytoplasm under stress conditions; involved in telomere maintenance RNA polymerase II fourth largest subunit Null mutant is viable, rpb4 mutants are heat and cold sensitive, exhibit slow growth at intermediate temperatures                                                                           |
| 0734           | GO_TERM:[biological_process] P-Value:9.6e-02                                                                                                                                                                                                                                                                                                                                                                                                                                    |
| YDL237W        |                                                                                                                                                                                                                                                                                                                                                                                                                                                                                 |
| YPR148C        |                                                                                                                                                                                                                                                                                                                                                                                                                                                                                 |
| 0735           | GO_TERM:[DNA metabolism] P-Value:1.3e-01                                                                                                                                                                                                                                                                                                                                                                                                                                        |
| YDL215C        | [GDH2] NAD(+)-dependent glutamate dehydrogenase, degrades glutamate to ammonia and alpha-ketoglutarate; expression sensitive to nitrogen catabolite repression and intracellular ammonia levels NAD-dependent glutamate dehydrogenase Null mutant is viable, grows very poorly on glutamate as a nitrogen source                                                                                                                                                                |
| YJL047C        | [RTT101] Cullin subunit of a Roc1p-dependent E3 ubiquitin ligase complex; deletion phenotype suggests a role in anaphase progression; interacts with Mms22p and implicated in Mms22-dependent DNA repair; modified by the ubiquitin-like protein, Rub1p Null mutant is viable and causes an increase in Ty1 transposition                                                                                                                                                       |
| YLR320W        | [MMS22] Protein involved in resistance to ionizing radiation; acts with Mms1p in a repair pathway that may be involved in resolving replication intermediates or preventing the damage caused by blocked replication forks Null: Null phenotype in haploids of either mating type and diploid is extreme sensitivity to MMS or hydroxyurea, moderate sensitivity to gamma or UV irradiation. Diploid is very sensitive to camtothecin. Diploid is also sensitive to bleomycin.. |
| 0736           | GO_TERM:[transcription factor TFIIA complex] P-Value:4.9e-06 OVERLAP:[TFIIA] <510.50> SIZE:2                                                                                                                                                                                                                                                                                                                                                                                    |
| YFR032C        |                                                                                                                                                                                                                                                                                                                                                                                                                                                                                 |
| YJL174W        | [KRE9] Glycoprotein involved in cell wall beta-glucan assembly; null mutation leads to severe growth defects, aberrant multibudded morphology, and mating defects Null mutant is viable, associated with growth defects, altered cell wall, aberrant multiply budded morphology, mating defects; exhibits double mutant lethality in combination with knh1, kre1, kre6, or kre11 mutants; killer toxin resistant; reduction in cell wall (1----6)-beta-glucan                   |
| <b>YKL058W</b> | [TOA2] TFIIA small subunit; involved in transcriptional activation, acts as antirepressor or as coactivator; homologous to smallest subunit of human and Drosophila TFIIA beta/transcription factor IIA subunit Null mutant is inviable. Overexpression of TFIIA partially suppresses an spt3 delta mutation.                                                                                                                                                                   |
| <b>YOR194C</b> | [TOA1] TFIIA large subunit; involved in transcriptional activation, acts as antirepressor or as coactivator; homologous to largest and second largest subunits of human and Drosophila TFIIA transcription factor IIA subunit alpha Null mutant is inviable. Overexpression of TFIIA partially suppresses an spt3 delta mutation. toa1 mutants have Spt-phenotypes. spt3 delta toa1 double mutants are inviable.                                                                |

|                |                                                                                                                                                                                                                                                                                                                                                                                                                                                                                                                                                                                                                                                                                                                                                                                                                                               |
|----------------|-----------------------------------------------------------------------------------------------------------------------------------------------------------------------------------------------------------------------------------------------------------------------------------------------------------------------------------------------------------------------------------------------------------------------------------------------------------------------------------------------------------------------------------------------------------------------------------------------------------------------------------------------------------------------------------------------------------------------------------------------------------------------------------------------------------------------------------------------|
| 0737           | GO_TERM:[catalytic activity] P-Value:7.3e-02                                                                                                                                                                                                                                                                                                                                                                                                                                                                                                                                                                                                                                                                                                                                                                                                  |
| YKR056W        | [TRM2] tRNA methyltransferase, 5-methylates the uridine residue at position 54 of tRNAs and may also have a role in tRNA stabilization or maturation; previously thought to be an endo-exonuclease tRNA methyltransferase                                                                                                                                                                                                                                                                                                                                                                                                                                                                                                                                                                                                                     |
| YKR072C        | [SIS2] Negative regulatory subunit of the protein phosphatase 1 Ppz1p; involved in ion homeostasis and cell cycle progression                                                                                                                                                                                                                                                                                                                                                                                                                                                                                                                                                                                                                                                                                                                 |
| 0738           | GO_TERM:[Cdc73/Paf1 complex] P-Value:1.6e-12 OVERLAP:[Casein kinase II] <120.20> SIZE:4                                                                                                                                                                                                                                                                                                                                                                                                                                                                                                                                                                                                                                                                                                                                                       |
| YLR418C        | [CDC73] Constituent of Paf1 complex with RNA polymerase II, Paf1p, Hpr1p, Ctr9, Leo1, Rtf1 and Ccr4p, distinct from Srb-containing Pol II complexes; required for expression of certain genes, modification of some histones, and telomere maintenance Mutations affect cell growth and the abundance of transcripts from a subset of genes                                                                                                                                                                                                                                                                                                                                                                                                                                                                                                   |
| YOR123C        | [LEO1] Component of the Paf1 complex, which associates with RNA polymerase II and is involved in histone methylation                                                                                                                                                                                                                                                                                                                                                                                                                                                                                                                                                                                                                                                                                                                          |
| YGL244W        | [RTF1] Subunit of the RNA polymerase II-associated Paf1 complex; directly or indirectly regulates DNA-binding properties of Spt15p and relative activities of different TATA elements; involved in telomere maintenance nuclear protein Null mutant is viable and can suppress TATA box-binding protein mutants (SPT15) in an allele-specific fashion                                                                                                                                                                                                                                                                                                                                                                                                                                                                                         |
| YBR279W        | [PAF1] RNA polymerase II-associated protein, defines a large complex that is biochemically and functionally distinct from the Srb-Mediator form of Pol II holoenzyme and is required for full expression of a subset of cell cycle-regulated genes                                                                                                                                                                                                                                                                                                                                                                                                                                                                                                                                                                                            |
| YOL145C        | [CTR9] Component of the Paf1p complex, which is a large complex that binds to and modulates the activity of RNA polymerase II and is required for expression of a subset of genes, including cyclin genes; contains TPR repeats Null mutant is viable, loses chromosomes and shows temperature sensitivity                                                                                                                                                                                                                                                                                                                                                                                                                                                                                                                                    |
| YKL112W        | [ABF1] DNA binding protein with possible chromatin-reorganizing activity involved in transcriptional activation, gene silencing, and DNA replication and repair ARS1 binding protein/transcriptional activator                                                                                                                                                                                                                                                                                                                                                                                                                                                                                                                                                                                                                                |
| YKL088W        |                                                                                                                                                                                                                                                                                                                                                                                                                                                                                                                                                                                                                                                                                                                                                                                                                                               |
| YMR172W        | [HOT1] Transcription factor required for the transient induction of glycerol biosynthetic genes GPD1 and GPP2 in response to high osmolarity; targets Hog1p to osmstress responsive promoters; has similarity to Msn1p and Ger1p nuclear protein osmstress hypersensitivity                                                                                                                                                                                                                                                                                                                                                                                                                                                                                                                                                                   |
| <b>YOR039W</b> | [CKB2] Beta' regulatory subunit of casein kinase 2, a Ser/Thr protein kinase with roles in cell growth and proliferation; the holoenzyme also contains CKA1, CKA2 and CKB1, the many substrates include transcription factors and all RNA polymerases protein kinase CK2, beta' subunit                                                                                                                                                                                                                                                                                                                                                                                                                                                                                                                                                       |
| <b>YGL019W</b> | [CKB1] Beta regulatory subunit of casein kinase 2, a Ser/Thr protein kinase with roles in cell growth and proliferation; the holoenzyme also contains CKA1, CKA2 and CKB2, the many substrates include transcription factors and all RNA polymerases protein kinase CK2 beta subunit Null mutant is viable, exhibits salt sensitivity specific to NaCl and LiCl                                                                                                                                                                                                                                                                                                                                                                                                                                                                               |
| <b>YOR061W</b> | [CKA2] Alpha' catalytic subunit of casein kinase 2, a Ser/Thr protein kinase with roles in cell growth and proliferation; the holoenzyme also contains CKA1, CKB1 and CKB2, the many substrates include transcription factors and all RNA polymerases protein kinase CK2 alpha' subunit Null mutant is viable, cka1 cka2 double deletion mutants are inviable; Cells in which protein kinase CK2 activity is depleted increase substantially in size prior to growth arrest, and a significant fraction of the arrested cells exhibit a pseudomycelial morphology. Disruption of the activity also results in flocculation. Yeast strains lacking both endogenous catalytic subunit genes can be rescued by expression of the alpha and beta subunits of Drosophila protein kinase CK2 or by expression of the Drosophila alpha subunit alone |
| 0739           | GO_TERM:[RNA polymerase II transcription elongation factor activity] P-Value:3.2e-14                                                                                                                                                                                                                                                                                                                                                                                                                                                                                                                                                                                                                                                                                                                                                          |
| YJR127C        | [RSF2] Zinc-finger protein involved in transcriptional control of both nuclear and mitochondrial genes, many of which specify products required for glycerol-based growth, respiration, and other functions                                                                                                                                                                                                                                                                                                                                                                                                                                                                                                                                                                                                                                   |
| YLR327C        | [TMA10] Protein of unknown function that associates with ribosomes                                                                                                                                                                                                                                                                                                                                                                                                                                                                                                                                                                                                                                                                                                                                                                            |
| YKL110C        | [KTI12] Protein associated with the RNA polymerase II Elongator complex; involved in sensitivity to G1 arrest induced by Kluyveromyces lactis toxin, zymocin Elongator associated protein resistant to Kluyveromyces lactis toxin; over expression also results in resistance to Kluyveromyces lactis toxin; zymotoxin resistant; slow growth; thermo-sensitive above 38C; caffeine; Calcofluor White and 6-azauracil sensitive; G1 cell cycle delay                                                                                                                                                                                                                                                                                                                                                                                          |
| YLR384C        | [IKI3] Subunit of RNA polymerase II elongator histone acetyltransferase complex, involved in maintaining its structural integrity; negatively regulates exocytosis independent of transcription, homolog of human familial dysautonomia (FD) protein Null mutant is viable; insensitive to pGKL killer toxin; zymotoxin resistant; slow growth; thermo-sensitive above 38 0C; caffeine, Calcofluor White and 6-azauracil sensitive; G1 cell cycle delay                                                                                                                                                                                                                                                                                                                                                                                       |
| YGR200C        | [ELP2] Elongator protein, part of the six-subunit RNA polymerase II Elongator histone acetyltransferase complex; target of Kluyveromyces lactis zymocin RNA polymerase II Elongator subunit                                                                                                                                                                                                                                                                                                                                                                                                                                                                                                                                                                                                                                                   |
| YPL086C        | [ELP3] Histone acetyltransferase subunit of the Elongator complex, which is a component of the RNA polymerase II holoenzyme; activity is directed specifically towards histones H3 and H4; disruption confers resistance to K. lactis zymotoxin RNA polymerase II Elongator subunit/histone acetyltransferase                                                                                                                                                                                                                                                                                                                                                                                                                                                                                                                                 |
| YPL101W        | [ELP4] Elongator protein, part of the HAP subcomplex of Elongator, which is a six-subunit component of the RNA polymerase II holoenzyme; required for Elongator structural integrity and histone acetyltransferase activity RNA polymerase II Elongator protein subunit                                                                                                                                                                                                                                                                                                                                                                                                                                                                                                                                                                       |
| YHR187W        | [IKI1] Subunit of the Elp4p-Iki1p-Elp6p-subcomplex of RNA polymerase II elongator complex, which is a histone acetyltransferase; iki1 mutations confer resistance to the K. lactis toxin zymocin Null mutant is viable but is insensitive to pGLK killer toxin; zymotoxin resistant; slow growth; thermo-sensitive above 38 0C; caffeine, Calcofluor White and 6-azauracil sensitive; G1 cell cycle delay                                                                                                                                                                                                                                                                                                                                                                                                                                     |
| YMR312W        | [ELP6] Elongator protein, part of the HAP subcomplex of Elongator, which is a six-subunit component of the RNA polymerase II holoenzyme; required for Elongator structural integrity and histone acetyltransferase activity RNA polymerase II Elongator protein subunit                                                                                                                                                                                                                                                                                                                                                                                                                                                                                                                                                                       |

|                |                                                                                                                                                                                                                                                                                                                                                                                                                                                                                                                           |
|----------------|---------------------------------------------------------------------------------------------------------------------------------------------------------------------------------------------------------------------------------------------------------------------------------------------------------------------------------------------------------------------------------------------------------------------------------------------------------------------------------------------------------------------------|
| 0740           | GO_TERM:[mitochondrial signaling pathway] P-Value:3.5e-06                                                                                                                                                                                                                                                                                                                                                                                                                                                                 |
| YGL252C        | [RTG2] Sensor of mitochondrial dysfunction; regulates the subcellular location of Rtg1p and Rtg3p, transcriptional activators of the retrograde (RTG) and TOR pathways; Rtg2p is inhibited by the phosphorylated form of Mks1p Null mutant is viable, fails to grow on acetate as a sole carbon source, auxotrophic for glutamate and aspartate; respiratory competent. <li>In rtg2 mutants, expansions of CTG/CAG repeats show modest increase in rate, depending on starting tract length; contractions are suppressed. |
| YNL076W        | [MKS1] Pleiotropic regulatory factor involved in Ras-CAMP and lysine biosynthetic pathways and nitrogen regulation; involved in retrograde (RTG) mitochondria-to-nucleus signaling negative transcriptional regulator Null mutant is viable, fails to grow on galactose media containing ethidium bromide at 25 degrees and on YPglycerol media at 37 degrees                                                                                                                                                             |
| 0741           | GO_TERM:[nuclear pore] P-Value:8.2e-06                                                                                                                                                                                                                                                                                                                                                                                                                                                                                    |
| YOR257W        | [CDC31] Component of the spindle pole body (SPB) half-bridge, required for SPB duplication in mitosis and meiosis II; homolog of mammalian centrin; interacts with Kar1p nuclear pore complex subunit spindle pole body calcium-binding protein component Null mutant is inviable. cdc31 mutants form reductional dyads with unduplicated spindle pole bodies                                                                                                                                                             |
| YDR159W        | [SAC3] Nuclear pore-associated protein, forms a complex with Thp1p that is involved in transcription and in mRNA export from the nucleus Null mutant is viable, grows more slowly and is larger than wild-type cells; exhibits increased benomyl resistance; in contrast to sac3-1, sac3 null mutants do not suppress the temperature and osmosensitivity of act1-1 mutants                                                                                                                                               |
| YOL072W        | [THP1] Nuclear pore-associated protein, forms a complex with Sac3p that is involved in transcription and in mRNA export from the nucleus; contains a PAM domain implicated in protein-protein binding Null mutant is viable and shows transcription-associated hyper-recombination and transcription elongation impairment, and is unable to transcribe the bacterial lacZ ORF                                                                                                                                            |
| 0742           | GO_TERM:[transcription factor complex] P-Value:7.7e-52 OVERLAP:[SAGA complex] <510.190.10.20.10> SIZE:16                                                                                                                                                                                                                                                                                                                                                                                                                  |
| YCR042C        | [TAF2] TFIID subunit (150 kDa), involved in RNA polymerase II transcription initiation TATA binding protein-associated factor                                                                                                                                                                                                                                                                                                                                                                                             |
| YMR005W        | [TAF4] TFIID subunit (48 kDa), involved in RNA polymerase II transcription initiation; potential Cdc28p substrate TFIID subunit                                                                                                                                                                                                                                                                                                                                                                                           |
| YML098W        | [TAF13] TFIID subunit (19 kDa), involved in RNA polymerase II transcription initiation, similar to histone H4 with atypical histone fold motif of Spt3-like transcription factors TFIID subunit                                                                                                                                                                                                                                                                                                                           |
| YMR227C        | [TAF7] TFIID subunit (67 kDa), involved in RNA polymerase II transcription initiation TFIID subunit                                                                                                                                                                                                                                                                                                                                                                                                                       |
| YML114C        | [TAF8] TFIID subunit (65 kDa), involved in RNA polymerase II transcription initiation TFIID subunit                                                                                                                                                                                                                                                                                                                                                                                                                       |
| YML015C        | [TAF11] TFIID subunit (40 kDa), involved in RNA polymerase II transcription initiation, similar to histone H3 with atypical histone fold motif of Spt3-like transcription factors TFIID subunit                                                                                                                                                                                                                                                                                                                           |
| YPL011C        | [TAF3] TFIID subunit (47 kDa), involved in promoter binding and RNA polymerase II transcription initiation TAF(II) complex component                                                                                                                                                                                                                                                                                                                                                                                      |
| YGR274C        | [TAF1] TFIID subunit (145 kDa), involved in RNA polymerase II transcription initiation, has histone acetyltransferase activity, involved in promoter binding and G1/S progression Null mutant is inviable, taf145 (ts) mutants arrest as small unbudded cells with a G0 like morphology at the nonpermissive temperature Mutations in region 4 (amino acid residues 199 to 303) confer both temperature-conditional (ts) growth phenotypes and transcription defects.                                                     |
| YER148W        | [SPT15] TATA-binding protein, general transcription factor that interacts with other factors to form the preinitiation complex at promoters, essential for viability TFIID subunit                                                                                                                                                                                                                                                                                                                                        |
| YER164W        | [CHD1] Nucleosome remodeling factor that functions in regulation of transcription elongation; contains a chromo domain, a helicase domain and a DNA-binding domain; component of both the SAGA and SILK complexes transcriptional regulator Null mutant is viable, resistant to 6-azauracil                                                                                                                                                                                                                               |
| <b>YGR252W</b> | [GCN5] Histone acetyltransferase, acetylates N-terminal lysines on histones H2B and H3; catalytic subunit of the ADA and SAGA histone acetyltransferase complexes; founding member of the Gcn5p-related N-acetyltransferase superfamily histone acetyltransferase Null mutant is viable, sensitive to intra-S-phase DNA damage, and grows poorly on minimal media.                                                                                                                                                        |
| <b>YHR099W</b> | [TRA1] Subunit of SAGA and NuA4 histone acetyltransferase complexes; interacts with acidic activators (e.g., Gal4p) which leads to transcription activation; similar to human TRRAP, which is a cofactor for c-Myc mediated oncogenic transformation ATM/Mec1/TOR1/TOR2-related NuA4 complex component                                                                                                                                                                                                                    |
| <b>YGL112C</b> | [TAF6] Subunit (60 kDa) of TFIID and SAGA complexes, involved in transcription initiation of RNA polymerase II and in chromatin modification, similar to histone H4 TATA-binding protein-associated-factor                                                                                                                                                                                                                                                                                                                |
| YBR111W-A      | [SUS1] Protein involved in mRNA export coupled transcription activation; component of the SAGA histone acetylase complex                                                                                                                                                                                                                                                                                                                                                                                                  |
| <b>YDR176W</b> | [NGG1] Transcriptional regulator involved in glucose repression of Gal4p-regulated genes; component of transcriptional adaptor and histone acetyltransferase complexes, the ADA complex, the SAGA complex, and the SLIK complex genetic and mutant analyses suggest that Ngg1p (Ada3p) is part of two transcriptional adaptor/HAT (histone acetyltransferase complexes, the 0.8 MD ADA complex and the 1.8 MD SAGA complex transcription factor Null mutant is viable, grows poorly on minimal media                      |
| <b>YDR448W</b> | [ADA2] Transcription coactivator, component of the ADA and SAGA transcriptional adaptor/HAT (histone acetyltransferase) complexes transcription factor Null mutant is viable, grows poorly on minimal media                                                                                                                                                                                                                                                                                                               |
| <b>YGL066W</b> | [SGF73] Probable 73 kDa subunit of SAGA histone acetyltransferase complex Probable 73KkDa Subunit of SAGA histone acetyltransferase complex                                                                                                                                                                                                                                                                                                                                                                               |
| <b>YDR145W</b> | [TAF12] Subunit (61/68 kDa) of TFIID and SAGA complexes, involved in RNA polymerase II transcription initiation and in chromatin modification, similar to histone H2A TFIID subunit                                                                                                                                                                                                                                                                                                                                       |
| <b>YDR167W</b> | [TAF10] Subunit (145 kDa) of TFIID and SAGA complexes, involved in RNA polymerase II transcription initiation and in chromatin modification TFIID subunit                                                                                                                                                                                                                                                                                                                                                                 |
| <b>YBR198C</b> | [TAF5] Subunit (90 kDa) of TFIID and SAGA complexes, involved in RNA polymerase II transcription initiation and in chromatin modification                                                                                                                                                                                                                                                                                                                                                                                 |
| <b>YMR236W</b> | [TAF9] Subunit (17 kDa) of TFIID and SAGA complexes, involved in RNA polymerase II transcription initiation and in chromatin modification, similar to histone H3 TFIID subunit                                                                                                                                                                                                                                                                                                                                            |

|                |                                                                                                                                                                                                                                                                                                                                                                                                                                                                                                                                                                                 |
|----------------|---------------------------------------------------------------------------------------------------------------------------------------------------------------------------------------------------------------------------------------------------------------------------------------------------------------------------------------------------------------------------------------------------------------------------------------------------------------------------------------------------------------------------------------------------------------------------------|
| <b>YLR055C</b> | [SPT8] Subunit of the SAGA transcriptional regulatory complex but not present in SAGA-like complex SLIK/SALSA, required for SAGA-mediated inhibition at some promoters probable member of histone acetyltransferase SAGA complex transcription factor Null mutant is viable, no growth defects, exhibits suppression of Ty insertion mutations, defects in Ty transcription                                                                                                                                                                                                     |
| <b>YBR081C</b> | [SPT7] Subunit of the SAGA transcriptional regulatory complex, involved in proper assembly of the complex; also present as a C-terminally truncated form in the SLIK/SALSA transcriptional regulatory complex histone acetyltransferase SAGA complex member transcription factor Null mutant is viable, exhibits growth defects on glucose and galactose, fails to grow on media lacking inositol                                                                                                                                                                               |
| YMR223W        | [UBP8] Ubiquitin-specific protease that is a component of the SAGA (Spt-Ada-Gcn5-Acetyltransferase) acetylation complex; required for SAGA-mediated deubiquitination of histone H2B                                                                                                                                                                                                                                                                                                                                                                                             |
| <b>YPL254W</b> | [HFI1] Adaptor protein required for structural integrity of the SAGA complex, a histone acetyltransferase-coactivator complex that is involved in global regulation of gene expression through acetylation and transcription functions Ada/Gcn5 protein complex member transcription factor Null mutant phenotypes similar to spt20/ada5 and spt7 mutants. Null mutant is viable, elongated cells, hyperpolarized actin cytoskeleton, heat sensitive, non-respiratory, inositol auxotroph, exhibits suppression of Ty insertion mutations; hfi1 hta1 double mutant is inviable. |
| YPL047W        | [SGF11] Integral subunit of SAGA histone acetyltransferase complex, regulates transcription of a subset of SAGA-regulated genes, required for the Ubp8p association with SAGA and for H2B deubiquitylation                                                                                                                                                                                                                                                                                                                                                                      |
| <b>YCL010C</b> | [SGF29] SaGa associated Factor 29kDa; Probable 29kKDa Subunit of SAGA histone acetyltransferase complex Probable 29kKDa Subunit of SAGA histone acetyltransferase complex                                                                                                                                                                                                                                                                                                                                                                                                       |
| <b>YDR392W</b> | [SPT3] Subunit of the SAGA and SAGA-like transcriptional regulatory complexes, interacts with Spt15p to activate transcription of some RNA polymerase II-dependent genes, also functions to inhibit transcription at some promoters histone acetyltransferase SAGA complex member transcription factor Null mutant is viable, exhibits defects in mating and sporulation, Ty transcription, and suppression of certain Ty insertion mutations                                                                                                                                   |
| <b>YOL148C</b> | [SPT20] Subunit of the SAGA transcriptional regulatory complex, involved in maintaining the integrity of the complex histone acetyltransferase SAGA complex member transcription factor Null mutant is viable, exhibits growth defects on glucose and galactose, fails to grow on media lacking inositol                                                                                                                                                                                                                                                                        |
| 0743           | GO_TERM:[organelle organization and biogenesis] P-Value:1.2e-01 OVERLAP:[Tubulin-associated proteins] <140.30.20> SIZE:14                                                                                                                                                                                                                                                                                                                                                                                                                                                       |
| YER116C        | [SLX8] Protein containing a RING finger domain that forms a complex with Hex3p; mutant phenotypes and genetic interactions suggest a possible role in resolving recombination intermediates during DNA replication or repair                                                                                                                                                                                                                                                                                                                                                    |
| <b>YOR058C</b> | [ASE1] Member of a family of microtubule-associated proteins (MAPs) that function at the mitotic spindle midzone; required for spindle elongation; undergoes cell cycle-regulated degradation by anaphase promoting complex; potential Cdc28p substrate spindle midzone component Null mutant is viable but temperature sensitive.                                                                                                                                                                                                                                              |
| 0744           | GO_TERM:[DNA replication-independent nucleosome assembly] P-Value:2.8e-16                                                                                                                                                                                                                                                                                                                                                                                                                                                                                                       |
| YJR140C        | [HIR3] Transcriptional corepressor involved in the cell cycle-regulated transcription of histone genes HTA1, HTB1, HHT1, and HHT2; involved in position-dependent gene silencing and nucleosome reassembly HTA1-HTB1 transcription is derepressed and is no longer cell-cycle regulated                                                                                                                                                                                                                                                                                         |
| YJL115W        | [ASF1] Nucleosome assembly factor, involved in chromatin assembly after DNA replication, anti-silencing protein that causes derepression of silent loci when overexpressed                                                                                                                                                                                                                                                                                                                                                                                                      |
| YBR215W        | [HPC2] Highly charged, basic protein required for normal cell-cycle regulation of histone gene transcription; mutants display strong synthetic defects with subunits of FACT, a complex that allows RNA Pol II to elongate through nucleosomes highly charged basic protein altered cell cycle regulation of histone gene transcription; suppresses delta insertion mutations in the HIS4 and LYS2 loci                                                                                                                                                                         |
| YBL008W        | [HIR1] Non-essential transcriptional corepressor involved in the cell cycle-regulated transcription of histone H2A, H2B, H3 and H4 genes; contributes to nucleosome formation, heterochromatic gene silencing, and formation of functional kinetochores contains nuclear targeting signal repressor protein (putative) similar to Tup1p and mammalian retinal transducin Null mutant is viable, but HTA1-HTB1 transcription is derepressed and is no longer cell-cycle regulated; other mutations in this gene give 'spt' gene-class phenotype                                  |
| YOR038C        | [HIR2] Non-essential transcriptional corepressor involved in the cell cycle-regulated transcription of histone H2A, H2B, H3, and H4 genes; recruits Swi-Snf complexes to histone gene promoters; promotes heterochromatic gene silencing with Asf1p contains nuclear targeting signal repressor protein (putative) Null mutant is viable, but HTA1-HTB1 transcription is derepressed and is no longer cell-cycle regulated; other mutations in this gene give 'spt' gene-class phenotype                                                                                        |
| 0745           | GO_TERM:[epsilon DNA polymerase activity] P-Value:1.4e-06 OVERLAP:[DNA polymerase epsilon (II)] <410.40.100> SIZE:3                                                                                                                                                                                                                                                                                                                                                                                                                                                             |
| YDR121W        | [DPB4] Shared subunit of DNA polymerase epsilon and of ISW2/yCHRAC chromatin accessibility complex; involved in both chromosomal DNA replication and in inheritance of telomeric silencing DNA polymerase II (epsilon) 4th subunit                                                                                                                                                                                                                                                                                                                                              |
| <b>YPR175W</b> | [DPB2] Second largest subunit of DNA polymerase II (DNA polymerase epsilon), required for normal yeast chromosomal replication; expression peaks at the G1/S phase boundary; potential Cdc28p substrate DNA polymerase epsilon subunit B Null mutant is inviable; conditional mutant shows defects in DNA replication                                                                                                                                                                                                                                                           |
| 0746           | GO_TERM:[ISW1 complex] P-Value:4.9e-06                                                                                                                                                                                                                                                                                                                                                                                                                                                                                                                                          |
| YLR095C        | [IOC2] Member of a complex (Isw1b) with Isw1p and Ioc4p that exhibits nucleosome-stimulated ATPase activity and acts within coding regions to coordinate transcription elongation with termination and processing, contains a PHD finger motif                                                                                                                                                                                                                                                                                                                                  |
| YMR044W        | [IOC4] Member of a complex (Isw1b) with Isw1p and Ioc2p that exhibits nucleosome-stimulated ATPase activity and acts within coding regions to coordinate transcription elongation with termination and processing, contains a PWWP motif                                                                                                                                                                                                                                                                                                                                        |
| 0747           | GO_TERM:[chromatin accessibility complex] P-Value:1.3e-09                                                                                                                                                                                                                                                                                                                                                                                                                                                                                                                       |
| YJL065C        | [DLS1] Subunit of ISW2/yCHRAC chromatin accessibility complex along with Itc1p, Isw2p, and Dpb4p; involved in inheritance of telomeric silencing                                                                                                                                                                                                                                                                                                                                                                                                                                |

|           |                                                                                                                                                                                                                                                                                                                                                                                                                                                                                                                                                                                                                                     |
|-----------|-------------------------------------------------------------------------------------------------------------------------------------------------------------------------------------------------------------------------------------------------------------------------------------------------------------------------------------------------------------------------------------------------------------------------------------------------------------------------------------------------------------------------------------------------------------------------------------------------------------------------------------|
| YGL133W   | [ITC1] Component of the ATP-dependent Isw2p-Itc1p chromatin remodeling complex, required for repression of a-specific genes, repression of early meiotic genes during mitotic growth, and repression of INO1 Null mutant is viable, but shows abnormal morphology and reduced mating efficiency when the disruption is in a MATalpha background.                                                                                                                                                                                                                                                                                    |
| YOR304W   | [ISW2] Member of the imitation-switch (ISWI) class of ATP-dependent chromatin remodeling complexes; ATPase component that, with Itc1p, forms a complex required for repression of a-specific genes, INO1, and early meiotic genes during mitotic growth ATPase component of a two subunit chromatin remodeling complex Null mutant is viable, isw1 isw2 chd1 triple deletion mutants are synthetically temperature and formamide sensitive                                                                                                                                                                                          |
| 0748      | GO_TERM:[chromosome] P-Value:6.1e-03                                                                                                                                                                                                                                                                                                                                                                                                                                                                                                                                                                                                |
| YBR089C-A | [NHP6B] High-mobility group non-histone chromatin protein, functionally redundant with Nhp6Ap; homologous to mammalian high mobility group proteins 1 and 2; acts to recruit transcription factor Rcs1p to certain promoters 11 kDa nonhistone chromosomal protein Deleting both NHP6A and NHP6B gives temperature-sensitive yeast with morphological and cytoskeletal defects at the restrictive temperature; defects are suppressed by 1 M sorbitol in the medium; nhp6a nhp6b double mutant also lacks induction of a subset of genes                                                                                            |
| YFR013W   | [IOC3] Member of a complex (Isw1a) with Isw1p that has nucleosome-stimulated ATPase activity and represses transcription initiation by specific positioning of a promoter proximal dinucleosome; has homology to Esc8p, which is involved in silencing                                                                                                                                                                                                                                                                                                                                                                              |
| YMR072W   | [ABF2] Mitochondrial DNA-binding protein involved in mitochondrial DNA replication and recombination, member of HMG1 DNA-binding protein family; activity may be regulated by protein kinase A phosphorylation HMG-1 homolog                                                                                                                                                                                                                                                                                                                                                                                                        |
| YKR001C   | [VPS1] GTPase required for vacuolar protein sorting, functions in actin cytoskeleton organization via its interaction with Sla1p; required for late Golgi-retention of some proteins including Kex2p; involved in regulating peroxisome biogenesis GTP-binding protein (putative)(dynamidin GTPase family member similar to mammalian Mx proteins Null mutant is viable, but is sporulation defective, fails to grow at high temperature and shows abnormal organization of intracellular membranes                                                                                                                                 |
| YPL082C   | [MOT1] Essential abundant protein involved in regulation of transcription, removes Spt15p (TBP) from DNA via its C-terminal ATPase activity, forms a complex with TBP that binds TATA DNA with high affinity but with altered specificity helicase (putative)                                                                                                                                                                                                                                                                                                                                                                       |
| 0749      | GO_TERM:[chromatin remodeling complex] P-Value:3.8e-49 OVERLAP:[RSC complex (Remodel the structure of chromatin)] <400> SIZE:10                                                                                                                                                                                                                                                                                                                                                                                                                                                                                                     |
| YFL049W   | [SWP82] Member of the SWI/SNF chromatin remodeling complex in which it plays an as yet unidentified role; has identifiable counterparts in closely related yeast species; abundantly expressed in many growth conditions; paralog of Npl6p                                                                                                                                                                                                                                                                                                                                                                                          |
| YOR290C   | [SNF2] Catalytic subunit of the SWI/SNF chromatin remodeling complex involved in transcriptional regulation; contains DNA-stimulated ATPase activity; functions interdependently in transcriptional activation with Snf5p and Snf6p transcriptional regulator                                                                                                                                                                                                                                                                                                                                                                       |
| YDR073W   | [SNF11] Subunit of the SWI/SNF chromatin remodeling complex involved in transcriptional regulation; interacts with a highly conserved 40-residue sequence of Snf2p SWI/SNF global transcription activator complex component                                                                                                                                                                                                                                                                                                                                                                                                         |
| YPL016W   | [SWI1] Subunit of the SWI/SNF chromatin remodeling complex, which regulates transcription by remodeling chromosomes; required for transcription of many genes, including ADH1, ADH2, GAL1, HO, INO1 and SUC2 zinc finger transcription factor null mutants are deficient in homothallic switching, unable to fully derepress ADH2 expression                                                                                                                                                                                                                                                                                        |
| YHL025W   | [SNF6] Subunit of the SWI/SNF chromatin remodeling complex involved in transcriptional regulation; functions interdependently in transcriptional activation with Snf2p and Snf5p chromatin remodeling Snf/Swi complex subunit Null mutant is viable, sucrose and raffinose nonfermenter                                                                                                                                                                                                                                                                                                                                             |
| YJL176C   | [SWI3] Subunit of the SWI/SNF chromatin remodeling complex, which regulates transcription by remodeling chromosomes; required for transcription of many genes, including ADH1, ADH2, GAL1, HO, INO1 and SUC2 transcription factor                                                                                                                                                                                                                                                                                                                                                                                                   |
| YBR289W   | [SNF5] Subunit of the SWI/SNF chromatin remodeling complex involved in transcriptional regulation; functions interdependently in transcriptional activation with Snf2p and Snf6p chromatin remodeling Snf/Swi complex subunit Null mutant is viable, sucrose and raffinose nonfermenter                                                                                                                                                                                                                                                                                                                                             |
| YNR023W   | [SNF12] 73 kDa subunit of the SWI/SNF chromatin remodeling complex involved in transcriptional regulation; homolog of Rsc6p subunit of the RSC chromatin remodeling complex; deletion mutants are temperature-sensitive RSC chromatin remodeling complex Rsc6p subunit homolog SWI/SNF transcription activation complex 73 kDa subunit Null mutant is viable but is temperature-sensitive, fails to transcribe SWI/SNF-dependent genes such as SUC2 and INO1, sucrose non-fermenting, defective in transcriptional activation by the glucocorticoid receptor; snf12 mutants are insensitive to expression of Adenovirus E1A protein |
| YLR176C   | [RFX1] Protein involved in DNA damage and replication checkpoint pathway; recruits repressors Tup1p and Cyc8p to promoters of DNA damage-inducible genes; similar to a family of mammalian DNA binding RFX1-4 proteins                                                                                                                                                                                                                                                                                                                                                                                                              |
| YHR056C   | [RSC30] One of 15 subunits of the 'Remodel the Structure of Chromatin' (RSC) complex; non-essential gene required for regulation of ribosomal protein genes and the cell wall/stress response; highly similar to Rsc3p; null mutants are osmosensitive                                                                                                                                                                                                                                                                                                                                                                              |
| YBR245C   | [ISW1] Member of the imitation-switch (ISWI) class of ATP-dependent chromatin remodeling complexes; ATPase that forms a complex with Ioc2p and Ioc4p to regulate transcription elongation, and a complex with Ioc3p to repress transcription initiation ATPase component of a four subunit chromatin remodeling complex Null mutant is viable, isw1 isw2 chd1 triple deletion mutants are synthetically temperature and formamide sensitive                                                                                                                                                                                         |
| YGR275W   | [RTT102] Component of both the SWI/SNF and RSC chromatin remodeling complexes, suggested role in chromosome maintenance; possible weak regulator of Ty1 transposition                                                                                                                                                                                                                                                                                                                                                                                                                                                               |
| YCR020W-B | [HTL1] Subunit of the RSC chromatin remodeling complex, a multisubunit complex that functions in transcriptional regulation, chromosome stability and establishing sister chromatid cohesion; involved in telomere maintenance Null mutant is viable but shows temperature-sensitive lethality                                                                                                                                                                                                                                                                                                                                      |
| YPR034W   | [ARP7] Actin-related protein involved in transcriptional regulation; subunit of the chromatin remodeling Snf/Swi complex actin related protein chromatin remodeling Snf/Swi complex subunit Null mutant is viable, exhibits typical swi/snf phenotypes, including growth defects on media containing galactose, glycerol, or sucrose as sole carbon sources. ARP7 is required for expression of an HO-lacZ fusion gene and for full transcriptional enhancement by the GAL4 activator                                                                                                                                               |

|                |                                                                                                                                                                                                                                                                                                                                                                                                                                                                                                                            |
|----------------|----------------------------------------------------------------------------------------------------------------------------------------------------------------------------------------------------------------------------------------------------------------------------------------------------------------------------------------------------------------------------------------------------------------------------------------------------------------------------------------------------------------------------|
| <b>YMR033W</b> | [ARP9] Actin-related protein involved in transcriptional regulation; subunit of the chromatin remodeling Snf/Swi complex actin related protein chromatin remodeling Snf/Swi complex subunit Null mutant is viable, exhibits typical swi/snf phenotypes, including growth defects on media containing galactose, glycerol, or sucrose as sole carbon sources. ARP9 is required for expression of an HO-lacZ fusion gene and for full transcriptional enhancement by the GAL4 activator                                      |
| <b>YIL126W</b> | [STH1] ATPase component of the ATP-dependent RSC chromatin remodeling complex required for kinetochore function in chromosome segregation; required for expression of early meiotic genes; essential helicase-related protein homologous to Snf2p helicase related protein snf2 homolog sth1 mutants exhibit altered centromeric and centromere-proximal chromatin structure and increased missegregation of authentic chromosomes; conditional mutants arrest at large bud stage with a single nucleus; null is inviable. |
| <b>YFR037C</b> | [RSC8] One of 15 subunits of the 'Remodel the Structure of Chromatin' (RSC) complex; essential for viability and mitotic growth; homolog of SWI/SNF subunit Swi3p, but unlike Swi3p, does not activate transcription of reporters                                                                                                                                                                                                                                                                                          |
| <b>YGR056W</b> | [RSC1] One of 15 subunits of the 'Remodel the Structure of Chromatin' (RSC) complex; required for expression of mid-late sporulation-specific genes; contains two essential bromodomains, a bromo-adjacent homology (BAH) domain, and an AT hook RSC complex member Null mutant is viable, grows slowly                                                                                                                                                                                                                    |
| YDR303C        | [RSC3] One of 15 subunits of the 'Remodel the Structure of Chromatin' (RSC) complex; essential gene required for regulation of ribosomal protein genes and the cell wall/stress response; highly similar to Rsc30p inviable; ts mutants display a G2/M arrest                                                                                                                                                                                                                                                              |
| YMR091C        | [NPL6] Component of the RSC chromatin remodeling complex; interacts with Rsc3p, Rsc30p, Ldb7p, and Htl1p to form a module important for a broad range of RSC functions; involved in nuclear protein import and maintenance of proper telomere length                                                                                                                                                                                                                                                                       |
| <b>YLR357W</b> | [RSC2] One of 15 subunits of the 'Remodel the Structure of Chromatin' (RSC) complex; required for expression of mid-late sporulation-specific genes; involved in telomere maintenance RSC complex member                                                                                                                                                                                                                                                                                                                   |
| <b>YCR052W</b> | [RSC6] One of 15 subunits of the 'Remodel the Structure of Chromatin' (RSC) complex; essential for mitotic growth; homolog of SWI/SNF subunit Swp73p                                                                                                                                                                                                                                                                                                                                                                       |
| <b>YLR321C</b> | [SFH1] Subunit of the RSC chromatin remodeling complex required for kinetochore function in chromosome segregation; essential gene required for cell cycle progression; phosphorylated in the G1 phase of the cell cycle; Snf5p paralog Snf5p homolog chromatin remodeling complex member, RSC sfh1 mutants exhibit altered centromeric and centromere-proximal chromatin structure and increased missegregation of authentic chromosomes; null mutant is inviable; sfh1 temp-sensitive mutants arrest in G1.              |
| YLR033W        | [RSC58] Remodels the structure of chromatin complex 58KDa subunit; Chromatin Remodeling Complex subunit 58KDa Subunit of RSC Chromatin Remodeling Complex                                                                                                                                                                                                                                                                                                                                                                  |
| <b>YKR008W</b> | [RSC4] One of 15 subunits of the 'Remodel the Structure of Chromatin' (RSC) complex; found in close proximity to nucleosomal DNA; displaced from the surface of nucleosomal DNA after chromatin remodeling RSC complex member                                                                                                                                                                                                                                                                                              |
| YML127W        | [RSC9] One of 15 subunits of the 'Remodel the Structure of Chromatin' (RSC) complex; DNA-binding protein involved in the synthesis of rRNA and in transcriptional repression and activation of genes regulated by the Target of Rapamycin (TOR) pathway                                                                                                                                                                                                                                                                    |
| 0750           | GO_TERM:[nucleolus] P-Value:3.2e-02 OVERLAP:[Topoisomerases] <410.40.140> SIZE:2                                                                                                                                                                                                                                                                                                                                                                                                                                           |
| YMR233W        |                                                                                                                                                                                                                                                                                                                                                                                                                                                                                                                            |
| <b>YOL006C</b> | [TOP1] Topoisomerase I, nuclear enzyme that relieves torsional strain in DNA by cleaving and re-sealing the phosphodiester backbone; relaxes both positively and negatively supercoiled DNA; functions in replication, transcription, and recombination topoisomerase I                                                                                                                                                                                                                                                    |
| 0751           | GO_TERM:[membrane] P-Value:6.6e-02 OVERLAP:[Ku complex] <510.180.30.10> SIZE:2                                                                                                                                                                                                                                                                                                                                                                                                                                             |
| YIR019C        | [MUC1] GPI-anchored cell surface glycoprotein required for diploid pseudohyphal formation and haploid invasive growth, transcriptionally regulated by the MAPK pathway (via Ste12p and Tec1p) and the cAMP pathway (via Flo8p) cell surface flocculin with structure similar to serine/threonine-rich GPI-anchored cell wall proteins Null mutant is viable, does not exhibit pseudohyphal differentiation as a diploid or invasive growth as a haploid                                                                    |
| <b>YMR284W</b> | [YKU70] Subunit of the telomeric Ku complex (Yku70p-Yku80p), involved in telomere length maintenance, structure and telomere position effect; relocates to sites of double-strand cleavage to promote nonhomologous end joining during DSB repair DNA binding protein                                                                                                                                                                                                                                                      |
| 0752           | GO_TERM:[protein folding] P-Value:1.2e-03                                                                                                                                                                                                                                                                                                                                                                                                                                                                                  |
| YCR060W        | [TAH1] HSP90 cofactor; interacts with Hsp82p, Pih1p, Rvb1 and Rvb2, contains a single TPR domain with at least two TPR motifs                                                                                                                                                                                                                                                                                                                                                                                              |
| YHR034C        | [PIH1] Protein of unresolved function; may function in protein folding and/or rRNA processing, interacts with a chaperone (Hsp82p), two chromatin remodeling factors (Rvb1p, Rvb2p) and two rRNA processing factors (Rrp43p, Nop58p) null has both reduced growth and reduced protein synthesis rates                                                                                                                                                                                                                      |
| 0753           | GO_TERM:[nuclear chromatin] P-Value:2.3e-21 OVERLAP:[Nucleosomal protein complex] <320> SIZE:8                                                                                                                                                                                                                                                                                                                                                                                                                             |
| YDR293C        | [SSD1] Protein with a role in maintenance of cellular integrity, interacts with components of the TOR pathway; ssd1 mutant of a clinical S. cerevisiae strain displays elevated virulence Suppressor of regulatory subunit of protein kinase                                                                                                                                                                                                                                                                               |
| YNL201C        | [PSY2] Nuclear protein of unknown function; deletion results in sensitivity to anticancer drugs oxaliplatin and cisplatin, but not mitomycin C; deletion is synthetically lethal with a chitin synthase (CHS1) null mutant                                                                                                                                                                                                                                                                                                 |
| YBL046W        | [PSY4] Putative protein of unknown function; green fluorescent protein (GFP)-fusion protein localizes to the nucleus Regulatory subunit of                                                                                                                                                                                                                                                                                                                                                                                 |

|                |                                                                                                                                                                                                                                                                                                                                                                                                                                                                                                                                                                                  |
|----------------|----------------------------------------------------------------------------------------------------------------------------------------------------------------------------------------------------------------------------------------------------------------------------------------------------------------------------------------------------------------------------------------------------------------------------------------------------------------------------------------------------------------------------------------------------------------------------------|
|                | Pph3p                                                                                                                                                                                                                                                                                                                                                                                                                                                                                                                                                                            |
| YDR075W        | [PPH3] Catalytic subunit of protein phosphatase; involved in activation of Gln3p, which is a transcription factor with a role in nitrogen utilization protein phosphatase type 2A Null mutant is viable, pph3 pph21 pph22 mutants are inviable                                                                                                                                                                                                                                                                                                                                   |
| YNL088W        | [TOP2] Essential type II topoisomerase, relieves torsional strain in DNA by cleaving and re-sealing the phosphodiester backbone of both positively and negatively supercoiled DNA; cleaves complementary strands; localizes to axial cores in meiosis topoisomerase II Null mutant is inviable; top2 mutants arrest at the mononucleate stage, Rec- mutants suppress the meiosis I block, suggesting TOP2 resolves recombinant chromosomes                                                                                                                                       |
| YDR174W        | [HMO1] Chromatin associated high mobility group (HMG) family member involved in genome maintenance; rDNA-binding component of the Pol I transcription system; associates with a 5'-3' DNA helicase and Fpr1p, a prolyl isomerase high mobility group (HMG) family Null mutant is viable, but grows slowly and shows higher than normal plasmid loss rate                                                                                                                                                                                                                         |
| YGL241W        | [KAP114] Karyopherin, responsible for nuclear import of Spt15p, histones H2A and H2B, and Nap1p; amino terminus shows similarity to those of other importins, particularly Cse1p; localization is primarily nuclear                                                                                                                                                                                                                                                                                                                                                              |
| YKR048C        | [NAP1] Protein that interacts with mitotic cyclin Clb2p; required for the regulation of microtubule dynamics during mitosis; controls bud morphogenesis; involved in the transport of H2A and H2B histones to the nucleus nucleosome assembly protein I Null mutant is viable but exhibits defects in Clb2 function.                                                                                                                                                                                                                                                             |
| YGL207W        | [SPT16] Subunit of the heterodimeric FACT complex (Spt16p-Pob3p), facilitates RNA Polymerase II transcription elongation through nucleosomes by destabilizing and then reassembling nucleosome structure suppression of Ty insertion mutations                                                                                                                                                                                                                                                                                                                                   |
| YML069W        | [POB3] Subunit of the heterodimeric FACT complex (Spt16p-Pob3p), which facilitates RNA Polymerase II transcription elongation through nucleosomes by destabilizing and then reassembling nucleosome structure DNA polymerase delta binding protein                                                                                                                                                                                                                                                                                                                               |
| YOL054W        | [YOL054W] Nuclear protein, putative RNA polymerase II elongation factor; isolated as Pob3p/Spt16p-binding protein                                                                                                                                                                                                                                                                                                                                                                                                                                                                |
| YGL097W        | [SRM1] Nucleotide exchange factor for Gsp1p, localizes to the nucleus, required for nucleocytoplasmic trafficking of macromolecules; potentially phosphorylated by Cdc28p pheromone response pathway suppressor recessive mutation activates signal transduction pathway required for mating; leads to arrest in G1. mutant phenotype reveals defect in plasmid and chromosome stability, suggesting defect in DNA replication, mitosis, or their coordination.                                                                                                                  |
| <b>YNL030W</b> | [HHF2] One of two identical histone H4 proteins (see also HHF1); core histone required for chromatin assembly and chromosome function; contributes to telomeric silencing; N-terminal domain involved in maintaining genomic integrity histone H4 (HHF1 and HHF2 code for identical proteins)                                                                                                                                                                                                                                                                                    |
| <b>YNL031C</b> | [HHT2] One of two identical histone H3 proteins (see also HHT1); core histone required for chromatin assembly, involved in heterochromatin-mediated telomeric and HM silencing; regulated by acetylation, methylation, and mitotic phosphorylation histone H3 (HHT1 and HHT2 code for identical proteins)                                                                                                                                                                                                                                                                        |
| <b>YBL002W</b> | [HTB2] One of two nearly identical (see HTB1) histone H2B subtypes required for chromatin assembly and chromosome function; Rad6p-Bre1p-Lge1p mediated ubiquitination regulates transcriptional activation, meiotic DSB formation and H3 methylation histone H2B (HTB1 and HTB2 code for nearly identical proteins) Null mutant is viable. Deletion of the HTA2-HTB2 (TRT2) locus has no reported observable phenotypes, presumably because HTA1-HTB1 (TRT1) expression is upregulated and can compensate in the absence of TRT2                                                 |
| <b>YBL003C</b> | [HTA2] One of two nearly identical (see also HTA1) histone H2A subtypes; core histone required for chromatin assembly and chromosome function; DNA damage-dependent phosphorylation by Mec1p facilitates DNA repair; acetylated by Nat4p histone H2A (HTA1 and HTA2 code for nearly identical proteins) Null mutant is viable. Deletion of the HTA2-HTB2 (TRT2) locus has no reported observable phenotypes, presumably because HTA1-HTB1 (TRT1) expression is upregulated and can compensate in the absence of TRT2. Overexpression of TRT2 can suppress Ty insertion mutations |
| <b>YBR009C</b> | [HHF1] One of two identical histone H4 proteins (see also HHF2); core histone required for chromatin assembly and chromosome function; contributes to telomeric silencing; N-terminal domain involved in maintaining genomic integrity histone H4 (HHF1 and HHF2 code for identical proteins)                                                                                                                                                                                                                                                                                    |
| <b>YBR010W</b> | [HHT1] One of two identical histone H3 proteins (see also HHT2); core histone required for chromatin assembly, involved in heterochromatin-mediated telomeric and HM silencing; regulated by acetylation, methylation, and mitotic phosphorylation histone H3 (HHT1 and HHT2 code for identical proteins)                                                                                                                                                                                                                                                                        |
| <b>YDR224C</b> | [HTB1] One of two nearly identical (see HTB2) histone H2B subtypes required for chromatin assembly and chromosome function; Rad6p-Bre1p-Lge1p mediated ubiquitination regulates transcriptional activation, meiotic DSB formation and H3 methylation histone H2B (HTB1 and HTB2 code for nearly identical proteins)                                                                                                                                                                                                                                                              |
| <b>YDR225W</b> | [HTA1] One of two nearly identical (see also HTA2) histone H2A subtypes; core histone required for chromatin assembly and chromosome function; DNA damage-dependent phosphorylation by Mec1p facilitates DNA repair; acetylated by Nat4p histone H2A (HTA1 and HTA2 code for nearly identical proteins)                                                                                                                                                                                                                                                                          |
| 0754           | GO_TERM:[INO80 complex] P-Value:2.8e-27                                                                                                                                                                                                                                                                                                                                                                                                                                                                                                                                          |
| YFL039C        | [ACT1] Actin, structural protein involved in cell polarization, endocytosis, and other cytoskeletal functions actin                                                                                                                                                                                                                                                                                                                                                                                                                                                              |
| YNL215W        | [IES2] Protein that associates with the INO80 chromatin remodeling complex under low-salt conditions                                                                                                                                                                                                                                                                                                                                                                                                                                                                             |
| YPL235W        | [RVB2] Essential protein involved in transcription regulation; component of chromatin remodeling complexes; required for assembly and function of the INO80 complex; member of the RUVB-like protein family transcriptional regulator                                                                                                                                                                                                                                                                                                                                            |
| YOR189W        | [IES4] Protein that associates with the INO80 chromatin remodeling complex under low-salt conditions Null: non essential.                                                                                                                                                                                                                                                                                                                                                                                                                                                        |
| YDR190C        | [RVB1] Essential protein involved in transcription regulation; component of chromatin remodeling complexes; required for assembly and function of the INO80 complex; member of the RUVB-like protein family                                                                                                                                                                                                                                                                                                                                                                      |
| YJL081C        | [ARP4] Nuclear actin-related protein involved in chromatin remodeling, component of chromatin-remodeling enzyme complexes actin related protein                                                                                                                                                                                                                                                                                                                                                                                                                                  |
| YDL002C        | [NHP10] Protein related to mammalian high mobility group proteins; likely component of the INO80 complex, which is an ATP-dependent chromatin-remodeling complex HMG1-box containing protein null mutant is viable and has normal growth rate                                                                                                                                                                                                                                                                                                                                    |
| YFL013C        | [IES1] Subunit of the INO80 chromatin remodeling complex                                                                                                                                                                                                                                                                                                                                                                                                                                                                                                                         |
| YLR052W        | [IES3] Subunit of the INO80 chromatin remodeling complex                                                                                                                                                                                                                                                                                                                                                                                                                                                                                                                         |

|                |                                                                                                                                                                                                                                                                                                                                                                                                                                                                                                                |
|----------------|----------------------------------------------------------------------------------------------------------------------------------------------------------------------------------------------------------------------------------------------------------------------------------------------------------------------------------------------------------------------------------------------------------------------------------------------------------------------------------------------------------------|
| YOR141C        | [ARP8] Nuclear actin-related protein involved in chromatin remodeling, component of chromatin-remodeling enzyme complexes                                                                                                                                                                                                                                                                                                                                                                                      |
| YGL150C        | [INO80] ATPase that forms a large complex, containing actin and several actin-related proteins, that has chromatin remodeling activity and 3' to 5' DNA helicase activity in vitro; shows similarity to the Snf2p family of ATPases                                                                                                                                                                                                                                                                            |
| YER092W        | [IES5] Protein that associates with the INO80 chromatin remodeling complex under low-salt conditions Null: non essential.                                                                                                                                                                                                                                                                                                                                                                                      |
| YEL044W        | [IES6] Protein that associates with the INO80 chromatin remodeling complex under low-salt conditions Null: non essential.                                                                                                                                                                                                                                                                                                                                                                                      |
| YNL059C        | [ARP5] Nuclear actin-related protein involved in chromatin remodeling, component of chromatin-remodeling enzyme complexes actin related protein                                                                                                                                                                                                                                                                                                                                                                |
| 0755           | GO_TERM:[nucleoplasm part] P-Value:2.2e-24 OVERLAP:[NuA4 complex] <230.20.40> SIZE:2                                                                                                                                                                                                                                                                                                                                                                                                                           |
| YJR082C        | [EAF6] Esa1p-associated factor, subunit of the NuA4 acetyltransferase complex                                                                                                                                                                                                                                                                                                                                                                                                                                  |
| YNL136W        | [EAF7] Subunit of the NuA4 histone acetyltransferase complex, which acetylates the N-terminal tails of histones H4 and H2A                                                                                                                                                                                                                                                                                                                                                                                     |
| YHR090C        | [YNG2] Subunit of the NuA4 histone acetyltransferase complex that acetylates histone H4 and H2A; has similarity to the human tumor suppressor ING1 NuA4 histone acetyltransferase complex component carbon source-, heat shock-, temperature-, and caffeine-sensitive, abnormal morphology, reduced histone H4 acetylation; BEM and RAD phenotypes; haploid yng2 mutants do not tolerate mutations in genes important for nonhomologous end joining repair yet remain proficient for homologous recombination. |
| YPR023C        | [EAF3] Esa1p-associated factor, nonessential component of the NuA4 acetyltransferase complex, homologous to Drosophila dosage compensation protein MSL3                                                                                                                                                                                                                                                                                                                                                        |
| <b>YOR244W</b> | [ESA1] Histone acetyltransferase catalytic subunit of the native multisubunit complex (NuA4) that acetylates four conserved internal lysines of histone H4 N-terminal tail; required for cell cycle progression NuA4 complex component acetyltransferase in the SAS gene family                                                                                                                                                                                                                                |
| YFL024C        | [EPL1] Component of NuA4, which is an essential histone H4/H2A acetyltransferase complex; homologous to Drosophila Enhancer of Polycomb NuA4 histone acetyltransferase complex component                                                                                                                                                                                                                                                                                                                       |
| YDR359C        | [VID21] Component of the NuA4 histone acetyltransferase complex                                                                                                                                                                                                                                                                                                                                                                                                                                                |
| YEL018W        | [EAF5] Esa1p-associated factor, subunit of the NuA4 acetyltransferase complex                                                                                                                                                                                                                                                                                                                                                                                                                                  |
| YLR085C        | [ARP6] Nuclear actin-related protein involved in chromatin remodeling, component of chromatin-remodeling enzyme complexes                                                                                                                                                                                                                                                                                                                                                                                      |
| YOL012C        | [HTZ1] Histone variant H2AZ, exchanged for histone H2A in nucleosomes by the SWR1 complex; involved in transcriptional regulation through prevention of the spread of silent heterochromatin evolutionarily conserved member of the histone H2A F/Z family of histone variants Null mutant is viable at 28C; high copy suppressor of histone H4 point mutant affecting nucleosome structure                                                                                                                    |
| YAL011W        | [SWC3] Protein of unknown function, component of the Swr1p complex that incorporates Htz1p into chromatin; required for formation of nuclear-associated array of smooth endoplasmic reticulum known as karmellae                                                                                                                                                                                                                                                                                               |
| YML041C        | [VPS71] Protein of unknown function, component of the Swr1p complex that incorporates Htz1p into chromatin; required for vacuolar protein sorting Null mutant secretes CPY.                                                                                                                                                                                                                                                                                                                                    |
| YLR385C        | [SWC7] Protein of unknown function, component of the Swr1p complex that incorporates Htz1p into chromatin                                                                                                                                                                                                                                                                                                                                                                                                      |
| YBR231C        | [SWC5] Protein of unknown function, component of the Swr1p complex that incorporates Htz1p into chromatin Null: Cold-sensitive; Benomyl hypersensitive; Latrunculin-A hypersensitive                                                                                                                                                                                                                                                                                                                           |
| YDR334W        | [SWR1] Swi2/Snf2-related ATPase, component of the SWR1 complex; required for the incorporation of Htz1p into chromatin Null: Null mutant is viable and shows no growth defects; swr1 rat8-2 and swr1 rsc9-1 double mutants has a slow growth phenotype; SWR1 is a partial High copy suppressor of pse1-1 kap123                                                                                                                                                                                                |
| YDR485C        | [VPS72] Protein of unknown function, component of the Swr1p complex that incorporates Htz1p into chromatin; required for vacuolar protein sorting Null mutant secretes CPY.                                                                                                                                                                                                                                                                                                                                    |
| YGR002C        | [SWC4] Protein of unknown function, component of the Swr1p complex that incorporates Htz1p into chromatin; component of the NuA4 histone acetyltransferase complex                                                                                                                                                                                                                                                                                                                                             |
| YNL107W        | [YAF9] Subunit of both the NuA4 histone H4 acetyltransferase complex and the SWR1 complex, may function to antagonize silencing near telomeres; interacts directly with Swc4p, has homology to human leukemogenic protein AF9, contains a YEATS domain                                                                                                                                                                                                                                                         |
| 0756           | GO_TERM:[molecular_function] P-Value:3.7e-01                                                                                                                                                                                                                                                                                                                                                                                                                                                                   |
| YFR030W        | [MET10] Subunit alpha of assimilatory sulfite reductase, which is responsible for the conversion of sulfite into sulfide sulfite reductase alpha subunit                                                                                                                                                                                                                                                                                                                                                       |
| YJL123C        |                                                                                                                                                                                                                                                                                                                                                                                                                                                                                                                |
| YOL109W        | [ZEO1] Peripheral membrane protein of the plasma membrane that interacts with Mid2p; regulates the cell integrity pathway mediated by Pkc1p and Slt2p Null mutant is viable and exhibits slow growth in galactose                                                                                                                                                                                                                                                                                              |
| 0757           | GO_TERM:[GPI-anchor transamidase activity] P-Value:1.2e-05 OVERLAP:[cytoplasmic ribosomal large subunit] <500.40.10> SIZE:81                                                                                                                                                                                                                                                                                                                                                                                   |
| YLR459W        | [GAB1] GPI transamidase subunit, involved in attachment of glycosylphosphatidylinositol (GPI) anchors to proteins; may have a role in recognition of the attachment signal or of the lipid portion of GPI                                                                                                                                                                                                                                                                                                      |
| <b>YNL301C</b> | [RPL18B] Protein component of the large (60S) ribosomal subunit, identical to Rpl18Ap and has similarity to rat L18 ribosomal protein ribosomal protein L18B (rp28B)                                                                                                                                                                                                                                                                                                                                           |
| YGR192C        | [TDH3] Glyceraldehyde-3-phosphate dehydrogenase, isozyme 3, involved in glycolysis and gluconeogenesis; tetramer that catalyzes the reaction of glyceraldehyde-3-phosphate to 1,3 bis-phosphoglycerate; detected in the cytoplasm and cell-wall glyceraldehyde-3-phosphate dehydrogenase 3                                                                                                                                                                                                                     |
| YDR434W        | [GPI17] Transmembrane protein subunit of the glycosylphosphatidylinositol transamidase complex that adds GPIs to newly synthesized proteins; human PIG-Sp homologue GPI transamidase component, human PIG-S homologue                                                                                                                                                                                                                                                                                          |

|                         |                                                                                                                                                                                                                                                                                                                                                                                                                                                                                                                                                                                         |
|-------------------------|-----------------------------------------------------------------------------------------------------------------------------------------------------------------------------------------------------------------------------------------------------------------------------------------------------------------------------------------------------------------------------------------------------------------------------------------------------------------------------------------------------------------------------------------------------------------------------------------|
| YKL039W                 | [PTM1] Protein of unknown function, copurifies with late Golgi vesicles containing the v-SNARE Tlg2p membrane protein (putative) Null mutant is viable, no observable phenotype                                                                                                                                                                                                                                                                                                                                                                                                         |
| 0758                    | GO_TERM:[response to abiotic stimulus] P-Value:8.1e-03                                                                                                                                                                                                                                                                                                                                                                                                                                                                                                                                  |
| YBL061C                 | [SKT5] Activator of Chs3p (chitin synthase III), recruits Chs3p to the bud neck via interaction with Bni4p; has similarity to Shc1p, which activates Chs3p during sporulation Null mutant is viable, resistant to Calcofluor white, exhibits a reduction in cell wall chitin and chitin synthase III activity                                                                                                                                                                                                                                                                           |
| YGL073W                 | [HSF1] Trimeric heat shock transcription factor, activates multiple genes in response to hyperthermia; recognizes variable heat shock elements (HSEs) consisting of inverted NGAAN repeats; constitutively DNA-bound; posttranslationally regulated heat shock transcription factor                                                                                                                                                                                                                                                                                                     |
| YLR419W                 |                                                                                                                                                                                                                                                                                                                                                                                                                                                                                                                                                                                         |
| 0759                    | GO_TERM:[phenylalanine-tRNA ligase complex] P-Value:3.0e-06 OVERLAP:[Phenylalanine-tRNA-ligase] <330> SIZE:3                                                                                                                                                                                                                                                                                                                                                                                                                                                                            |
| <a href="#">YFL022C</a> | [FRS2] Alpha subunit of cytoplasmic phenylalanyl-tRNA synthetase, forms a tetramer with Frs1p to form active enzyme; evolutionarily distant from mitochondrial phenylalanyl-tRNA synthetase based on protein sequence, but substrate binding is similar phenylalanine-tRNA ligase subunit                                                                                                                                                                                                                                                                                               |
| <a href="#">YLR060W</a> | [FRS1] Beta subunit of cytoplasmic phenylalanyl-tRNA synthetase, forms a tetramer with Frs2p to generate the active enzyme; evolutionarily distant from mitochondrial phenylalanyl-tRNA synthetase based on protein sequence, but substrate binding is similar phenylalanine-tRNA ligase subunit                                                                                                                                                                                                                                                                                        |
| YDL193W                 | [NUS1] Prenyltransferase, required for cell viability prenyltransferase                                                                                                                                                                                                                                                                                                                                                                                                                                                                                                                 |
| YJR132W                 | [NMD5] Karyopherin, a carrier protein involved in nuclear import of proteins; importin beta homolog Upf1p interacting protein importin beta homolog Kap119p Null mutant is viable, exhibits mislocalization of TFIIS and Hog1p                                                                                                                                                                                                                                                                                                                                                          |
| 0760                    | GO_TERM:[mitochondrion] P-Value:2.4e-01                                                                                                                                                                                                                                                                                                                                                                                                                                                                                                                                                 |
| YGL143C                 | [MRF1] Mitochondrial polypeptide chain release factor, involved in stop codon recognition and hydrolysis of the peptidyl-tRNA bond during mitochondrial translation; lack of MRF1 causes mitochondrial genome instability mitochondrial polypeptide chain release factor Null mutant is viable but shows high instability of the mitochondrial genome, reduced synthesis of mitochondrial translation products, and respiratory deficiency                                                                                                                                              |
| YNL063W                 | [MTQ1] S-adenosylmethionine-dependent Methyltransferase; methylates translational release factor Mrf1p; similar to E.coli PrmC; is not an essential gene                                                                                                                                                                                                                                                                                                                                                                                                                                |
| 0761                    |                                                                                                                                                                                                                                                                                                                                                                                                                                                                                                                                                                                         |
| YJL057C                 | [IKS1] Putative serine/threonine kinase; expression is induced during mild heat stress; deletion mutants are hypersensitive to copper sulphate and resistant to sorbate; interacts with an N-terminal fragment of Sst2p Null mutant is heat shock sensitive                                                                                                                                                                                                                                                                                                                             |
| YKL096W-A               | [CWP2] Covalently linked cell wall mannoprotein, major constituent of the cell wall; plays a role in stabilizing the cell wall; involved in low pH resistance; precursor is GPI-anchored cell wall mannoprotein Null mutant is viable, displays increased sensitivity to Congo red, calcofluor white, and Zymolyase                                                                                                                                                                                                                                                                     |
| 0762                    | GO_TERM:[enzyme activator activity] P-Value:9.0e-04                                                                                                                                                                                                                                                                                                                                                                                                                                                                                                                                     |
| YOR027W                 | [STI1] Hsp90 cochaperone, interacts with the Ssa group of the cytosolic Hsp70 chaperones; activates the ATPase activity of Ssa1p; homolog of mammalian Hop protein heat shock protein also induced by canavanine and entry into stationary phase Null mutant is viable but shows slow growth at high or low temperatures; shows synthetic interactions with hsp82, cpr7, kin28 and sba1                                                                                                                                                                                                 |
| YDR168W                 | [CDC37] Essential Hsp90p co-chaperone; necessary for passage through the START phase of the cell cycle Null mutant is inviable; temperature-sensitive mutants arrest in G1 and form shmoo morphology at the restrictive temperature                                                                                                                                                                                                                                                                                                                                                     |
| YFL029C                 | [CAK1] Cyclin-dependent kinase-activating kinase required for passage through the cell cycle, phosphorylates and activates Cdc28p; nucleotide-binding pocket differs significantly from those of most other protein kinases cyclin-dependent kinase-activating kinase Null mutant is inviable; temperature-sensitive mutant confers a G2 delay accompanied by low Cdc28p protein kinase activity                                                                                                                                                                                        |
| 0763                    | GO_TERM:[hydrolase activity] P-Value:2.3e-02                                                                                                                                                                                                                                                                                                                                                                                                                                                                                                                                            |
| Q0160                   | [SCEI] I-SceI DNA endonuclease, encoded by the mitochondrial group I intron of the 21S_rRNA gene; mediates gene conversion that propagates the intron into intron-less copies of the 21S_rRNA gene                                                                                                                                                                                                                                                                                                                                                                                      |
| YBL075C                 | [SSA3] ATPase involved in protein folding and the response to stress; plays a role in SRP-dependent cotranslational protein-membrane targeting and translocation; member of the heat shock protein 70 (HSP70) family; localized to the cytoplasm heat shock protein of HSP70 family Null mutant is viable; an intact copy of SSA3 regulated by the constitutive SSA2 promoter is capable of rescuing the inviability of an ssa1 ssa2 ssa4 strain; an intact copy of SSA3 regulated by the constitutive SSA2 promoter is capable of rescuing the inviability of an ssa1 ssa2 ssa4 strain |
| 0764                    | GO_TERM:[catalytic activity] P-Value:4.0e-02                                                                                                                                                                                                                                                                                                                                                                                                                                                                                                                                            |

|         |                                                                                                                                                                                                                                                                                                                                                                                                                                                                                                                  |
|---------|------------------------------------------------------------------------------------------------------------------------------------------------------------------------------------------------------------------------------------------------------------------------------------------------------------------------------------------------------------------------------------------------------------------------------------------------------------------------------------------------------------------|
| YGL065C | [ALG2] Presumed early mannosyltransferase involved in the N-linked glycosylation pathway; alg2 mutants exhibit temperature-sensitive growth and abnormal accumulation of the lipid-linked oligosaccharide Man2GlcNAc2-PP-Dol glycosyltransferase Null mutant is inviable, mutants accumulate Man1-2GlcNAc2 and arrest at G1                                                                                                                                                                                      |
| YER103W | [SSA4] Heat shock protein that is highly induced upon stress; plays a role in SRP-dependent cotranslational protein-membrane targeting and translocation; member of the HSP70 family; cytoplasmic protein that concentrates in nuclei upon starvation HSP70 family Null mutant is viable; ssa1 ssa2 ssa4 strains are inviable; an intact copy of SSA3 regulated by the constitutive SSA2 promoter is capable of rescuing the inviability of an ssa1 ssa2 ssa4 strain                                             |
| YPR001W | [CIT3] Citrate synthase, catalyzes the condensation of acetyl coenzyme A and oxaloacetate to form citrate, mitochondrial isozyme involved in the TCA cycle citrate synthase Null mutant shows severely reduced growth on the respiratory substrate glycerol in a delta cit1 background                                                                                                                                                                                                                           |
| 0765    | GO_TERM:[nuclear pore] P-Value:3.0e-07                                                                                                                                                                                                                                                                                                                                                                                                                                                                           |
| YPR021C | [AGC1] Mitochondrial transporter, acts both as a glutamate uniporter and as an aspartate-glutamate exchanger; involved in nitrogen metabolism, ornithine synthesis, and the malate-aspartate NADH shuttle Aspartate-glutamate transporter Null: viable. Other phenotypes: not viable on minimal medium supplemented with acetate or oleate                                                                                                                                                                       |
| YMR129W | [POM152] Nuclear pore membrane glycoprotein; may be involved in duplication of nuclear pores and nuclear pore complexes during S-phase; membrane glycoprotein nuclear pore complex subunit Null mutant is viable; overproduction inhibits cell growth; synthetically lethal with NUP170 and NUP188                                                                                                                                                                                                               |
| YML031W | [NDC1] Nuclear envelope protein with multiple putative transmembrane domains, required for nuclear pore complex assembly and spindle pole body duplication; required for meiosis II multiple transmembrane domains (putative) nuclear envelope protein nuclear pore complex subunit Null mutant is inviable. Conditional lethal mutants are available that show asymmetric chromosomal segregation during mitosis and meiosis II due to a defect in spindle pole body duplication                                |
| YDL088C | [ASM4] Nuclear pore complex subunit, part of a subcomplex also containing Nup53p, Nup170p, and Pse1p nuclear pore complex subunit Null mutant is viable in some strain backgrounds (including CEN.PK2); however, in the FY1679 genetic background, it is inviable.                                                                                                                                                                                                                                               |
| YMR153W | [NUP53] Subunit of the nuclear pore complex (NPC), interacts with karyopherin Kap121p or with Nup170p via overlapping regions of Nup53p, involved in activation of the spindle checkpoint mediated by the Mad1p-Mad2p complex karyopherin docking complex component of the nuclear pore complex nuclear pore complex subunit Null mutant is viable but disrupts Kap121 localization to the nuclear envelope.                                                                                                     |
| 0766    | GO_TERM:[biopolymer metabolism] P-Value:5.3e-01                                                                                                                                                                                                                                                                                                                                                                                                                                                                  |
| YLR256W | [HAP1] Zinc finger transcription factor involved in the complex regulation of gene expression in response to levels of heme and oxygen; the S288C sequence differs from other strain backgrounds due to a Ty1 insertion in the carboxy terminus zinc finger transcription factor of the Zn(2)-Cys(6) binuclear cluster domain type Essential for anaerobic or heme deficient growth; Null mutant is viable, deficient in expression of CYC1 and CYC7                                                             |
| YNL064C | [YDJ1] Protein chaperone involved in regulation of the HSP90 and HSP70 functions; involved in protein translocation across membranes; member of the DnaJ family heat shock protein yeast dnaJ homolog (nuclear envelope protein) slow growth at 23 degrees, inviable at 37 degrees; modest mitochondrial import defect at 23 degrees, substantial import defect at 37 degrees                                                                                                                                    |
| 0767    | GO_TERM:[oxidoreductase activity, acting on the CH-OH group of donors, NAD or NADP as acceptor] P-Value:3.4e-04                                                                                                                                                                                                                                                                                                                                                                                                  |
| YDL246C | [SOR2] Protein of unknown function, computational analysis of large-scale protein-protein interaction data suggests a possible role in fructose or mannose metabolism                                                                                                                                                                                                                                                                                                                                            |
| YJR159W | [SOR1] Sorbitol dehydrogenase; expression is induced in the presence of sorbitol sorbitol dehydrogenase, sorbitol-induced                                                                                                                                                                                                                                                                                                                                                                                        |
| 0768    | GO_TERM:[nucleus] P-Value:6.9e-01                                                                                                                                                                                                                                                                                                                                                                                                                                                                                |
| YGL164C | [YRB30] RanGTP-binding protein, inhibits RanGAP1 (Rna1p)-mediated GTP hydrolysis of RanGTP (Gsp1p); shares similarity to proteins in other fungi but not in higher eukaryotes Overproduction of the full-length protein and complete deletion of the open reading frame reveal no obvious phenotype. <br>Overproduction of C-term truncated forms of the protein inhibits yeast vegetative growth.                                                                                                               |
| YOR185C | [GSP2] GTP binding protein (mammalian Ranp homolog) involved in the maintenance of nuclear organization, RNA processing and transport; interacts with Kap121p, Kap123p and Pdr6p (karyophilin betas); Gsp1p homolog that is not required for viability GTP-binding protein Gsp1p homolog                                                                                                                                                                                                                         |
| 0769    | GO_TERM:[protein folding] P-Value:3.8e-07                                                                                                                                                                                                                                                                                                                                                                                                                                                                        |
| YPL106C | [SSE1] ATPase that is a component of the heat shock protein Hsp90 chaperone complex; binds unfolded proteins; member of the heat shock protein 70 (HSP70) family; localized to the cytoplasm HSP70 family SSA1 SSE2 homolog Null mutant is viable, slow growing, shows no additive effects with sse2 null mutation; temperature sensitive in some strain backgrounds                                                                                                                                             |
| YLL024C | [SSA2] ATP binding protein involved in protein folding and vacuolar import of proteins; member of heat shock protein 70 (HSP70) family; associated with the chaperonin-containing T-complex; present in the cytoplasm, vacuolar membrane and cell wall HSP70 family Null mutant is viable, temperature sensitive; ssa1 ssa2 ssa4 strains are inviable; an intact copy of SSA3 regulated by the constitutive SSA2 promoter is capable of rescuing the inviability of an ssa1 ssa2 ssa4 strain                     |
| YAL005C | [SSA1] ATPase involved in protein folding and nuclear localization signal (NLS)-directed nuclear transport; member of heat shock protein 70 (HSP70) family; forms a chaperone complex with Ydj1p; localized to the nucleus, cytoplasm, and cell wall heat shock protein of HSP70 family Null mutant is viable, temperature sensitive; ssa1 ssa2 ssa4 strains are inviable; an intact copy of SSA3 regulated by the constitutive SSA2 promoter is capable of rescuing the inviability of an ssa1 ssa2 ssa4 strain |
| YDL229W | [SSB1] Cytoplasmic ATPase that is a ribosome-associated molecular chaperone, functions with J-protein partner Zuo1p; may be involved in folding of newly-made polypeptide chains; member of the HSP70 family; interacts with phosphatase subunit Reg1p HSP70 family                                                                                                                                                                                                                                              |

|         |                                                                                                                                                                                                                                                                                                                                                                                                                                                                                                                                                                                                     |
|---------|-----------------------------------------------------------------------------------------------------------------------------------------------------------------------------------------------------------------------------------------------------------------------------------------------------------------------------------------------------------------------------------------------------------------------------------------------------------------------------------------------------------------------------------------------------------------------------------------------------|
| 0770    | GO_TERM:[protein import into nucleus] P-Value:1.3e-03                                                                                                                                                                                                                                                                                                                                                                                                                                                                                                                                               |
| YDR002W | [YRB1] Ran GTPase binding protein; involved in nuclear protein import and RNA export, ubiquitin-mediated protein degradation during the cell cycle; shuttles between the nucleus and cytoplasm; is essential; homolog of human RanBP1 yrb1 (ts) mutants are defective in protein import and nuclear export                                                                                                                                                                                                                                                                                          |
| YMR235C | [RNA1] GTPase activating protein (GAP) for Gsp1p, involved in nuclear transport GTPase activating protein (GAP) for Gsp1p inviable, RNA synthesis defective                                                                                                                                                                                                                                                                                                                                                                                                                                         |
| 0771    | GO_TERM:[protein carrier activity] P-Value:8.3e-06                                                                                                                                                                                                                                                                                                                                                                                                                                                                                                                                                  |
| YLR347C | [KAP95] Karyopherin beta, forms a dimeric complex with Srp1p (Kap60p) that mediates nuclear import of cargo proteins via a nuclear localization signal (NLS), interacts with nucleoporins to guide transport across the nuclear pore complex karyopherin beta (importin 90) homolog (95 kDa) essential, ts mutant shows nuclear import defect                                                                                                                                                                                                                                                       |
| YNL189W | [SRP1] Karyopherin alpha homolog, forms a dimer with karyopherin beta Kap95p to mediate import of nuclear proteins, binds the nuclear localization signal of the substrate during import; may also play a role in regulation of protein degradation karyopherin alpha suppressor of rpb1, cold-sensitive                                                                                                                                                                                                                                                                                            |
| 0772    | GO_TERM:[structural constituent of nuclear pore] P-Value:4.6e-06                                                                                                                                                                                                                                                                                                                                                                                                                                                                                                                                    |
| YAR002W | [NUP60] Subunit of the nuclear pore complex (NPC), functions to anchor Nup2p to the NPC in a process controlled by the nucleoplasmic concentration of Gsp1p-GTP; potential Cdc28p substrate; involved in telomere maintenance nuclear pore complex subunit                                                                                                                                                                                                                                                                                                                                          |
| YKL186C | [MTR2] mRNA transport regulator, essential nuclear protein; Mex67p and Mtr2p form a mRNA export complex which binds to RNA mRNA transport regulator Null mutant is inviable; mtr2 mutants exhibit nuclear mRNA accumulation and nucleolar fragmentation                                                                                                                                                                                                                                                                                                                                             |
| YPL169C | [MEX67] Poly(A)RNA binding protein involved in nuclear mRNA export, component of the nuclear pore; ortholog of human TAP a poly(A)+RNA binding protein                                                                                                                                                                                                                                                                                                                                                                                                                                              |
| 0773    | GO_TERM:[nuclear pore organization and biogenesis] P-Value:2.6e-52 OVERLAP:[NUP84 complex] <310.40> SIZE:6                                                                                                                                                                                                                                                                                                                                                                                                                                                                                          |
| YJL061W | [NUP82] Subunit of the nuclear pore complex (NPC), forms a subcomplex with Nup159p and Nsp1p, interacts with Nup116p and is required for proper localization of Nup116p in the NPC 82 kDa protein, with putative coiled-coil domain, has carboxy-terminal domain, containing heptad repeats, that binds Nsp1p/nuclear pore complex subunit/nucleoporin Null mutant is inviable; cells depleted of Nup82p, or cells with temperature-sensitive Nup82p at nonpermissive temperature, show defect in poly(A)+RNA export but no major alterations in nuclear envelope structure or nuclear pore density |
| YIL115C | [NUP159] Subunit of the nuclear pore complex that is found exclusively on the cytoplasmic side, forms a subcomplex with Nup82p and Nsp1p, required for mRNA export nucleoporin Null mutant is inviable; at nonpermissive temperature, a temperature-sensitive mutant shows cessation of mRNA export without cytoplasmic accumulation of NLS-containing reporter protein, while at permissive temperature, the nuclear pore complexes are clustered; temperature-sensitive allele is synthetically lethal with nup120 and is suppressed by high copy GLE1                                            |
| YJL041W | [NSP1] Essential component of the nuclear pore complex, which mediates nuclear import and export nuclear pore complex subunit                                                                                                                                                                                                                                                                                                                                                                                                                                                                       |
| YOR098C | [NUP1] Nuclear pore complex (NPC) subunit, involved in protein import/export and in export of RNAs, possible karyopherin release factor that accelerates release of karyopherin-cargo complexes after transport across NPC; potential Cdc28p substrate nuclear pore complex subunit Davis and Fink (Cell 61:965-978) report that a NUP1 deletion is inviable, whereas Schlaich and Hurt (Eur J Cell Biol 127:319-332) report that NUP1 deletion is viable.                                                                                                                                          |
| YBL079W | [NUP170] Abundant subunit of the nuclear pore complex (NPC), required for proper localization of specific nucleoporins within the NPC, involved in nuclear envelope permeability and in chromosome segregation, has similarity to Nup157p nuclear pore complex subunit Null mutant is viable; synthetically lethal with nup157, nup188, and pom152; changing NUP170 expression causes morphological abnormalities in nuclear envelope                                                                                                                                                               |
| YMR308C | [PSE1] Karyopherin/importin that interacts with the nuclear pore complex; acts as the nuclear import receptor for specific proteins, including Pdr1p, Yap1p, Ste12p, and Aft1p karyopherin Null mutant is viable but grows very slowly; overexpression of PSE1 results in enhanced protein secretion                                                                                                                                                                                                                                                                                                |
| YML103C | [NUP188] Subunit of the nuclear pore complex (NPC), involved in the structural organization of the complex and of the nuclear envelope, also involved in nuclear envelope permeability, interacts with Pom152p and Nic96p nuclear pore complex subunit Null mutant is viable but exhibits abnormalities in nuclear envelope and nuclear pore morphology; dominant mutants of nup188 are temperature-sensitive and show nuclear envelope herniations; synthetically lethal with pom152, nup157, and nup170                                                                                           |
| YFR002W | [NIC96] Component of the nuclear pore complex, required for nuclear pore formation; forms a subcomplex with Nsp1p, Nup57p, and Nup49p 96 kDa nucleoporin-interacting component[nuclear pore complex subunit                                                                                                                                                                                                                                                                                                                                                                                         |
| YDR192C | [NUP42] Subunit of the nuclear pore complex (NPC) that localizes exclusively to the cytoplasmic side; involved in RNA export, most likely at a terminal step; interacts with Gle1p 42 kDa protein associated with nuclear pore complexes; structurally related to the FG-nucleoporin family of pore proteins[nuclear pore complex subunit Null mutant is viable, NUP42 is essential for the export of heat shock mRNAs following stress                                                                                                                                                             |
| YLR335W | [NUP2] Protein involved in nucleocytoplasmic transport, binds to either the nucleoplasmic or cytoplasmic faces of the nuclear pore complex depending on Ran-GTP levels; also has a role in chromatin organization nucleoporin Null mutant is viable; some combinations of alleles of nup1, nsp1 and nup2 are synthetically lethal                                                                                                                                                                                                                                                                   |
| YDR335W | [MSN5] Karyopherin involved in nuclear import and export; shown to be responsible for nuclear import of replication protein A and for export of several proteins including Swi6p, Far1p, and Pho4p; cargo dissociation involves binding to RanGTP Disruptants are not completely sterile                                                                                                                                                                                                                                                                                                            |

|                |                                                                                                                                                                                                                                                                                                                                                                                                                                                                                                                                                                                                                                                                                                                                                                                                                                                     |
|----------------|-----------------------------------------------------------------------------------------------------------------------------------------------------------------------------------------------------------------------------------------------------------------------------------------------------------------------------------------------------------------------------------------------------------------------------------------------------------------------------------------------------------------------------------------------------------------------------------------------------------------------------------------------------------------------------------------------------------------------------------------------------------------------------------------------------------------------------------------------------|
| YMR047C        | [NUP116] Subunit of the nuclear pore complex (NPC) that is localized to both sides of the pore; contains a repetitive GLFG motif that interacts with mRNA export factor Mex67p and with karyopherin Kap95p; homologous to Nup100p nuclear pore complex subunit Null mutant grows slowly, accumulates unspliced pre-tRNAs, accumulates poly(A) <sup>+</sup> RNA in the nucleus, and is temperature-sensitive; at nonpermissive temperature, null mutants show membrane seals covering cytoplasmic face of nuclear pore complexes; synthetically lethal with nsp1, nup100, and nup145                                                                                                                                                                                                                                                                 |
| YKL068W        | [NUP100] Subunit of the nuclear pore complex (NPC) that is localized to both sides of the pore; contains a repetitive GLFG motif that interacts with mRNA export factor Mex67p and with karyopherin Kap95p; homologous to Nup116p nuclear pore complex subunit Null mutant is viable with no obvious phenotypes; synthetically lethal with nup116 and gle2 mutants                                                                                                                                                                                                                                                                                                                                                                                                                                                                                  |
| YGR119C        | [NUP57] Essential subunit of the nuclear pore complex (NPC), functions as the organizing center of an NPC subcomplex containing Nsp1p, Nup49p, Nup57p, and Nic96p nucleoporin                                                                                                                                                                                                                                                                                                                                                                                                                                                                                                                                                                                                                                                                       |
| YGL172W        | [NUP49] Subunit of the Nsp1p-Nup57p-Nup49p-Nic96p subcomplex of the nuclear pore complex (NPC), required for nuclear export of ribosomes nuclear pore complex subunit Null mutant is inviable; some nsp1 nsp49 alleles exhibit synthetic lethality                                                                                                                                                                                                                                                                                                                                                                                                                                                                                                                                                                                                  |
| <b>YDL116W</b> | [NUP84] Subunit of the nuclear pore complex (NPC), forms a subcomplex with Nup85p, Nup120p, Nup145p-C, Sec13p, and Seh1p that plays a role in nuclear mRNA export and NPC biogenesis nuclear pore complex subunit similar to mammalian Nup107p Null mutant is viable but has defects in nuclear membrane and nuclear pore complex organization and in poly(A) <sup>+</sup> RNA transport                                                                                                                                                                                                                                                                                                                                                                                                                                                            |
| <b>YLR208W</b> | [SEC13] Component of both the Nup84 nuclear pore sub-complex and of the COPII complex (Sar1p, Sec13p, Sec16p, Sec23p, Sec24p, Sec31p, Sfb2p, and Sfb3p) which is important for the formation of ER to Golgi transport vesicles nuclear pore complex subunit protein involved in release of transport vesicles from the ER Null mutant is inviable; ts mutants exhibit defects in secretion.                                                                                                                                                                                                                                                                                                                                                                                                                                                         |
| <b>YGL100W</b> | [SEH1] Nuclear pore protein that is part of the evolutionarily conserved Nup84p complex (Nup84p, Nup85p, Nup120p, Nup145p, and Seh1p); homologous to Sec13p nuclear pore complex subunit                                                                                                                                                                                                                                                                                                                                                                                                                                                                                                                                                                                                                                                            |
| YER105C        | [NUP157] Abundant subunit of the nuclear pore complex (NPC), present on both sides of the NPC, has similarity to Nup170p nuclear pore complex subunit Null mutant is viable; synthetically lethal with nup170 and nup188                                                                                                                                                                                                                                                                                                                                                                                                                                                                                                                                                                                                                            |
| <b>YGL092W</b> | [NUP145] Essential nucleoporin, catalyzes its own cleavage in vivo to generate a C-terminal fragment that assembles into the Nup84p subcomplex of the nuclear pore complex, and an N-terminal fragment of unknown function that is homologous to Nup100p nuclear pore complex subunit Null mutant is inviable, depletion of Nup145p in vivo leads rapidly to nuclear retention of polyadenylated RNAs and more slowly to cytoplasmic accumulation of a nuclear reporter protein                                                                                                                                                                                                                                                                                                                                                                     |
| <b>YJR042W</b> | [NUP85] Subunit of the Nup84p subcomplex of the nuclear pore complex (NPC), required for assembly of the subcomplex and also for formation of the nucleocytoplasmic Gsp1p concentration gradient that plays a role in nuclear trafficking nuclear pore complex subunit Null mutant is viable but is temperature-sensitive; at nonpermissive temperature, null mutant accumulates poly(A) <sup>+</sup> RNA and has fragmented nucleolus; at permissive temperature, nuclear envelope of null mutant detaches from nucleus                                                                                                                                                                                                                                                                                                                            |
| <b>YKL057C</b> | [NUP120] Subunit of the Nup84p subcomplex of the nuclear pore complex (NPC), required for even distribution of NPCs around the nuclear envelope, involved in establishment of a normal nucleocytoplasmic concentration gradient of the GTPase Gsp1p 100 kDa protein (predicted molecular weight is 120 kDa) with two leucine zipper motifs, coiled-coil region, and some homology to Nup133p nuclear pore complex subunit Null mutant is viable but grows slower, is temperature-sensitive, and shows nucleolar fragmentation and clustering of nuclear pore complexes; at nonpermissive temperature, null mutant accumulates poly(A) <sup>+</sup> mRNA in nucleus and shows nucleolar fragmentation and spindle defects; temperature sensitivity can be suppressed by growth in high osmolarity media; synthetically lethal with nup133 and nup159 |
| YKR082W        | [NUP133] Subunit of the Nup84p subcomplex of the nuclear pore complex (NPC), localizes to both sides of the NPC, required to establish a normal nucleocytoplasmic concentration gradient of the GTPase Gsp1p nuclear pore complex subunit Null mutant is viable but grows slowly and is temperature-sensitive; at nonpermissive temperature, poly(A) <sup>+</sup> RNA accumulates in nucleus (although nuclear import of karyophilic proteins is not blocked) and nuclear pores cluster; synthetically lethal with nup120                                                                                                                                                                                                                                                                                                                           |
| 0774           | GO_TERM:[glyceraldehyde-3-phosphate dehydrogenase (phosphorylating) activity] P-Value:8.1e-06                                                                                                                                                                                                                                                                                                                                                                                                                                                                                                                                                                                                                                                                                                                                                       |
| YKR042W        | [UTH1] Mitochondrial outer membrane and cell wall localized SUN family member required for mitochondrial autophagy; involved in the oxidative stress response, life span during starvation, mitochondrial biogenesis, and cell death extension of yeast lifespan                                                                                                                                                                                                                                                                                                                                                                                                                                                                                                                                                                                    |
| YML053C        |                                                                                                                                                                                                                                                                                                                                                                                                                                                                                                                                                                                                                                                                                                                                                                                                                                                     |
| YEL023C        |                                                                                                                                                                                                                                                                                                                                                                                                                                                                                                                                                                                                                                                                                                                                                                                                                                                     |
| YJL052W        | [TDH1] Glyceraldehyde-3-phosphate dehydrogenase, isozyme 1, involved in glycolysis and gluconeogenesis; tetramer that catalyzes the reaction of glyceraldehyde-3-phosphate to 1,3 bis-phosphoglycerate; detected in the cytoplasm and cell-wall glyceraldehyde-3-phosphate dehydrogenase 1 Null mutant is viable, tdh1 tdh2 and tdh1 tdh3 double mutants grow at wild type rates when ethanol is used as a carbon source                                                                                                                                                                                                                                                                                                                                                                                                                            |
| YJR009C        | [TDH2] Glyceraldehyde-3-phosphate dehydrogenase, isozyme 2, involved in glycolysis and gluconeogenesis; tetramer that catalyzes the reaction of glyceraldehyde-3-phosphate to 1,3 bis-phosphoglycerate; detected in the cytoplasm and cell-wall glyceraldehyde 3-phosphate dehydrogenase Null mutant is viable, grow poorly on glucose, grow as well as wild-type on ethanol media, tdh2 tdh3 double deletion mutants are inviable                                                                                                                                                                                                                                                                                                                                                                                                                  |
| 0775           | GO_TERM:[biopolymer metabolism] P-Value:5.3e-01 OVERLAP:[tRNA splicing] <440.30.30> SIZE:11                                                                                                                                                                                                                                                                                                                                                                                                                                                                                                                                                                                                                                                                                                                                                         |
| <b>YDR463W</b> | [STP1] Transcription factor, activated by proteolytic processing in response to signals from the SPS sensor system for external amino acids; activates transcription of amino acid permease genes and may have a role in tRNA processing zinc finger motif protein null is viable, but causes reduced efficiency of SUP4-mediated suppression, and is also sensitive to sulfonylurea herbicides on complex media (YPD); multiple copies enhance the suppression of SUP4(G37)                                                                                                                                                                                                                                                                                                                                                                        |
| YJL156C        | [SSY5] Component of the SPS plasma membrane amino acid sensor system (Ssy1p-Ptr3p-Ssy5p), which senses external amino acid concentration and transmits intracellular signals that result in regulation of expression of amino acid permease genes Sensitive to sulfonylurea herbicides on complex media (YPD)                                                                                                                                                                                                                                                                                                                                                                                                                                                                                                                                       |

|                |                                                                                                                                                                                                                                                                                                                                                                                                                                    |
|----------------|------------------------------------------------------------------------------------------------------------------------------------------------------------------------------------------------------------------------------------------------------------------------------------------------------------------------------------------------------------------------------------------------------------------------------------|
| 0776           | GO_TERM:[mitochondrion] P-Value:1.0e-01 OVERLAP:[tRNA splicing] <440.30.30> SIZE:11                                                                                                                                                                                                                                                                                                                                                |
| YDR457W        | [TOM1] E3 ubiquitin ligase of the hect-domain class; has a role in mRNA export from the nucleus and may regulate transcriptional coactivators Null mutant is viable and temperature sensitive, and arrests at the G2/M boundary of the cell cycle                                                                                                                                                                                  |
| YOL025W        | [LAG2] Protein involved in determination of longevity; LAG2 gene is preferentially expressed in young cells; overexpression extends the mean and maximum life span of cells A Tn3 insertion into this gene causes hypersensitivity to the cell surface polymer perturbing agent calcofluor white; Null mutant is viable but shows 50% reduction in mean and maximum life span; overexpression increases mean and maximum life span |
| <b>YDL048C</b> | [STP4] Protein containing a Kruppel-type zinc-finger domain; has similarity to Stp1p, Stp2p, and Stp3p                                                                                                                                                                                                                                                                                                                             |
| YNR022C        | [MRPL50] Mitochondrial ribosomal protein of the large subunit, not essential for mitochondrial translation                                                                                                                                                                                                                                                                                                                         |
| YMR186W        | [HSC82] Cytoplasmic chaperone of the Hsp90 family, redundant in function and nearly identical with Hsp82p, and together they are essential; expressed constitutively at 10-fold higher basal levels than HSP82 and induced 2-3 fold by heat shock chaperonin Null mutant is viable at 25 degrees C; ability to grow at higher temperatures varies with gene copy number                                                            |
| YOL029C        |                                                                                                                                                                                                                                                                                                                                                                                                                                    |
| 0777           | GO_TERM:[transketolase activity] P-Value:4.6e-07                                                                                                                                                                                                                                                                                                                                                                                   |
| YHL014C        | [YLF2] Protein of unknown function; shares weak similarity to E. coli GTP-binding protein gtp1                                                                                                                                                                                                                                                                                                                                     |
| YBR117C        | [TKL2] Transketolase, similar to Tkl1p; catalyzes conversion of xylulose-5-phosphate and ribose-5-phosphate to sedoheptulose-7-phosphate and glyceraldehyde-3-phosphate in the pentose phosphate pathway; needed for synthesis of aromatic amino acids transketolase, similar to TKL1 tkl1 tkl2 mutants are auxotrophic for aromatic amino acids                                                                                   |
| YPR074C        | [TKL1] Transketolase, similar to Tkl2p; catalyzes conversion of xylulose-5-phosphate and ribose-5-phosphate to sedoheptulose-7-phosphate and glyceraldehyde-3-phosphate in the pentose phosphate pathway; needed for synthesis of aromatic amino acids transketolase 1 tkl1 tkl2 mutants are auxotrophic for aromatic amino acids                                                                                                  |
| 0778           | GO_TERM:[translation elongation factor activity] P-Value:3.0e-04 OVERLAP:[eEF1] <500.20.10> SIZE:6                                                                                                                                                                                                                                                                                                                                 |
| YJL101C        | [GSH1] Gamma glutamylcysteine synthetase, catalyzes the first step in the gamma-glutamyl cycle for glutathione (GSH) biosynthesis; expression induced by oxidants, cadmium, and mercury gamma-glutamylcysteine synthetase Null mutant is viable, exhibits alteration of glutathione content and reduction in growth rate                                                                                                           |
| YLR249W        | [YEF3] Translational elongation factor, stimulates the binding of aminoacyl-tRNA (AA-tRNA) to ribosomes by releasing EF-1 alpha from the ribosomal complex; contains two ABC cassettes; binds and hydrolyses ATP Translation elongation factor 3 (EF-3)                                                                                                                                                                            |
| YHR169W        | [DBP8] Putative ATP-dependent RNA helicase of the DEAD-box family involved in biogenesis of the 40S ribosomal subunit dead box protein                                                                                                                                                                                                                                                                                             |
| YPL226W        | [NEW1] ATP binding cassette family member; Asn/Gln-rich rich region supports [NU+] prion formation, susceptibility to [PSI+] prion induction and aggregation of a fragment of the human Machado-Joseph Disease protein                                                                                                                                                                                                             |
| <b>YPR080W</b> | [TEF1] Translational elongation factor EF-1 alpha; also encoded by TEF2; functions in the binding reaction of aminoacyl-tRNA (AA-tRNA) to ribosomes translational elongation factor EF-1 alpha                                                                                                                                                                                                                                     |
| 0779           | GO_TERM:[translation elongation factor activity] P-Value:3.3e-10 OVERLAP:[eEF1] <500.20.10> SIZE:6                                                                                                                                                                                                                                                                                                                                 |
| YBR025C        |                                                                                                                                                                                                                                                                                                                                                                                                                                    |
| YDR234W        | [LYS4] Homoaconitase, catalyzes the conversion of homocitrate to homoisocitrate, which is a step in the lysine biosynthesis pathway homoaconitase Lysine requiring                                                                                                                                                                                                                                                                 |
| <b>YBR118W</b> | [TEF2] Translational elongation factor EF-1 alpha; also encoded by TEF1; functions in the binding reaction of aminoacyl-tRNA (AA-tRNA) to ribosomes translational elongation factor EF-1 alpha                                                                                                                                                                                                                                     |
| <b>YKL081W</b> | [TEF4] Translation elongation factor EF-1 gamma translation elongation factor EF-1gamma                                                                                                                                                                                                                                                                                                                                            |
| <b>YAL003W</b> | [EFB1] Translation elongation factor 1 beta; stimulates nucleotide exchange to regenerate EF-1 alpha-GTP for the next elongation cycle; part of the EF-1 complex, which facilitates binding of aminoacyl-tRNA to the ribosomal A site translation elongation factor EF-1beta                                                                                                                                                       |
| <b>YPL048W</b> | [CAM1] Translational cofactor elongation factor-1 gamma, participates in the regulation of GTP-binding protein EF-1 alpha, may play a redundant role in the regulation of protein synthesis or another GTP-dependent process calcium and phospholipid binding protein homologous to translation elongation factor 1-gamma (EF-1 gamma)                                                                                             |
| 0780           | GO_TERM:[catalytic activity] P-Value:1.8e-01 OVERLAP:[Anthranilate synthase] <70> SIZE:2                                                                                                                                                                                                                                                                                                                                           |
| YOR155C        | [ISN1] Inosine 5'-monophosphate (IMP)-specific 5'-nucleotidase, catalyzes the breakdown of IMP to inosine, does not show similarity to known 5'-nucleotidases from other organisms IMP 5'-Nucleotidase                                                                                                                                                                                                                             |
| YDR169C        | [STB3] Protein that binds Sin3p in a two-hybrid assay                                                                                                                                                                                                                                                                                                                                                                              |
| <b>YER090W</b> | [TRP2] Anthranilate synthase, catalyzes the initial step of tryptophan biosynthesis, forms multifunctional hetero-oligomeric anthranilate synthase:indole-3-glycerol phosphate synthase enzyme complex with Trp3p anthranilate synthase component I tryptophan requiring                                                                                                                                                           |

|                |                                                                                                                                                                                                                                                                                                                                                                                                                                                                                                                                                                                                                                                                                                                                                                                                                                                                                                                                                  |
|----------------|--------------------------------------------------------------------------------------------------------------------------------------------------------------------------------------------------------------------------------------------------------------------------------------------------------------------------------------------------------------------------------------------------------------------------------------------------------------------------------------------------------------------------------------------------------------------------------------------------------------------------------------------------------------------------------------------------------------------------------------------------------------------------------------------------------------------------------------------------------------------------------------------------------------------------------------------------|
| 0781           |                                                                                                                                                                                                                                                                                                                                                                                                                                                                                                                                                                                                                                                                                                                                                                                                                                                                                                                                                  |
| YMR304W        | [UBP15] Ubiquitin-specific protease that may play a role in ubiquitin precursor processing                                                                                                                                                                                                                                                                                                                                                                                                                                                                                                                                                                                                                                                                                                                                                                                                                                                       |
| YPR115W        |                                                                                                                                                                                                                                                                                                                                                                                                                                                                                                                                                                                                                                                                                                                                                                                                                                                                                                                                                  |
| 0782           | GO_TERM:[cytoplasmic part] P-Value:7.9e-01                                                                                                                                                                                                                                                                                                                                                                                                                                                                                                                                                                                                                                                                                                                                                                                                                                                                                                       |
| YBR196C        | [PGI1] Glycolytic enzyme phosphoglucose isomerase, catalyzes the interconversion of glucose-6-phosphate and fructose-6-phosphate; required for cell cycle progression and completion of the gluconeogenic events of sporulation glucose-6-phosphate isomerase phosphoglucose isomerase phosphoglucose isomerase deficient; exhibits defects in gluconeogenesis and sporulation                                                                                                                                                                                                                                                                                                                                                                                                                                                                                                                                                                   |
| YJL062W-A      |                                                                                                                                                                                                                                                                                                                                                                                                                                                                                                                                                                                                                                                                                                                                                                                                                                                                                                                                                  |
| 0783           | GO_TERM:[organic acid metabolism] P-Value:1.2e-02                                                                                                                                                                                                                                                                                                                                                                                                                                                                                                                                                                                                                                                                                                                                                                                                                                                                                                |
| YCL030C        | [HIS4] Multifunctional enzyme containing phosphoribosyl-ATP pyrophosphatase, phosphoribosyl-AMP cyclohydrolase, and histidinol dehydrogenase activities; catalyzes the second, third, ninth and tenth steps in histidine biosynthesis histidinol dehydrogenase Null mutant is viable and requires histidine                                                                                                                                                                                                                                                                                                                                                                                                                                                                                                                                                                                                                                      |
| YLR044C        | [PDC1] Major of three pyruvate decarboxylase isozymes, key enzyme in alcoholic fermentation, decarboxylates pyruvate to acetaldehyde; subject to glucose-, ethanol-, and autoregulation; involved in amino acid catabolism pyruvate decarboxylase undetectable pyruvate decarboxylase activity in <i>pdc1pdc5</i> double mutants                                                                                                                                                                                                                                                                                                                                                                                                                                                                                                                                                                                                                 |
| 0784           | OVERLAP:[Phosphofructokinase] <340> SIZE:2                                                                                                                                                                                                                                                                                                                                                                                                                                                                                                                                                                                                                                                                                                                                                                                                                                                                                                       |
| YIR007W        |                                                                                                                                                                                                                                                                                                                                                                                                                                                                                                                                                                                                                                                                                                                                                                                                                                                                                                                                                  |
| <b>YMR205C</b> | [PFK2] Beta subunit of heterooctameric phosphofructokinase involved in glycolysis, indispensable for anaerobic growth, activated by fructose-2,6-bisphosphate and AMP, mutation inhibits glucose induction of cell cycle-related genes phosphofructokinase beta subunit Null mutant is viable but exhibits slow growth and decreased efficiency of glucose utilization.                                                                                                                                                                                                                                                                                                                                                                                                                                                                                                                                                                          |
| 0785           | GO_TERM:[sphingolipid biosynthesis] P-Value:5.3e-06                                                                                                                                                                                                                                                                                                                                                                                                                                                                                                                                                                                                                                                                                                                                                                                                                                                                                              |
| YER100W        | [UBC6] Ubiquitin-conjugating enzyme involved in ER-associated protein degradation; located at the cytosolic side of the ER membrane; tail region contains a transmembrane segment at the C-terminus; substrate of the ubiquitin-proteasome pathway ubiquitin-conjugating enzyme                                                                                                                                                                                                                                                                                                                                                                                                                                                                                                                                                                                                                                                                  |
| YEL022W        | [GEA2] Guanine nucleotide exchange factor for ADP ribosylation factors (ARFs), involved in vesicular transport between the Golgi and ER, Golgi organization, and actin cytoskeleton organization; similar to but not functionally redundant with <i>Gea1p</i> ARF GTP/GDP exchange factor Null mutant is viable, synthetically lethal with <i>gea1</i> null mutant                                                                                                                                                                                                                                                                                                                                                                                                                                                                                                                                                                               |
| YJR077C        | [MIR1] Mitochondrial phosphate carrier, imports inorganic phosphate into mitochondria; functionally redundant with <i>Pic2p</i> but more abundant than <i>Pic2</i> under normal conditions Null mutant is viable on glucose containing media, but is unable to grow on a non-fermentable carbon source, shows reduced levels of mitochondrial proteins                                                                                                                                                                                                                                                                                                                                                                                                                                                                                                                                                                                           |
| YDR062W        | [LCB2] Component of serine palmitoyltransferase, responsible along with <i>Lcb1p</i> for the first committed step in sphingolipid synthesis, which is the condensation of serine with palmitoyl-CoA to form 3-ketosphinganine serine palmitoyltransferase component Auxotrophic for long-chain component of sphingolipids; some mutations can suppress the Ca <sup>2+</sup> -sensitive mutant <i>csg2</i>                                                                                                                                                                                                                                                                                                                                                                                                                                                                                                                                        |
| YBR058C-A      | [TSC3] Protein that stimulates the activity of serine palmitoyltransferase ( <i>Lcb1p</i> , <i>Lcb2p</i> ) several-fold; involved in sphingolipid biosynthesis Essential for cell viability only at elevated temperatures. Dominant mutations in <i>Lcb2p</i> subunit of serine palmitoyltransferase suppress temperature-sensitive growth phenotype of <i>tsc3 delta</i> null mutant.                                                                                                                                                                                                                                                                                                                                                                                                                                                                                                                                                           |
| YMR296C        | [LCB1] Component of serine palmitoyltransferase, responsible along with <i>Lcb2p</i> for the first committed step in sphingolipid synthesis, which is the condensation of serine with palmitoyl-CoA to form 3-ketosphinganine serine palmitoyltransferase component Null mutant is auxotrophic for long-chain component of sphingolipids; homozygous <i>lcb1</i> diploids fail to sporulate                                                                                                                                                                                                                                                                                                                                                                                                                                                                                                                                                      |
| 0786           | GO_TERM:[branched-chain-amino-acid transaminase activity] P-Value:1.2e-06                                                                                                                                                                                                                                                                                                                                                                                                                                                                                                                                                                                                                                                                                                                                                                                                                                                                        |
| YDR171W        | [HSP42] Small cytosolic stress-induced chaperone that forms barrel-shaped oligomers and suppresses the aggregation of non-native proteins; oligomer dissociation is not required for function; involved in cytoskeleton reorganization after heat shock Null mutant is viable; <i>hsp42 hsp26</i> double deletion mutants are viable; <i>hsp42</i> null mutants subjected to moderate thermal stress reorganize the actin cytoskeleton more slowly than wild-type                                                                                                                                                                                                                                                                                                                                                                                                                                                                                |
| YHR152W        | [SPO12] Nucleolar protein of unknown function, positive regulator of exit from mitosis; involved in regulating the release of <i>Cdc14p</i> from the nucleolus in early anaphase; proposed to play similar role in meiosis 20 kDa protein with negatively charged C-terminus required for function positive regulator of exit from M-phase in mitosis and meiosis (putative) sporulation defective; loss of function in mitosis results in delay in G <sub>2</sub> ; loss of function in meiosis results in a prolonged pachytene stage and presence of synaptonemal complexes, a single meiosis II-like equational division at the time of meiosis II, and dyad asci containing two diploid spores. Gain of function in mitosis suppresses M-phase anaphase arrest caused by overexpression of <i>CLB2 deg-</i> and mutants (e.g. <i>dbf2-ts</i> ). mRNA is cell cycle regulated (with <i>DBF2</i> ) in mitosis and increases 5-10x in meiosis. |
| YHR208W        | [BAT1] Mitochondrial branched-chain amino acid aminotransferase, homolog of murine ECA39; highly expressed during logarithmic phase and repressed during stationary phase branched-chain amino acid transaminase highly similar to mammalian ECA39, which is regulated by the oncogene <i>myc</i> Null mutant is viable; ILV auxotrophy in <i>bat1 bat2</i> double mutant                                                                                                                                                                                                                                                                                                                                                                                                                                                                                                                                                                        |
| YJR148W        | [BAT2] Cytosolic branched-chain amino acid aminotransferase, homolog of murine ECA39; highly expressed during stationary phase and repressed during logarithmic phase branched-chain amino acid transaminase                                                                                                                                                                                                                                                                                                                                                                                                                                                                                                                                                                                                                                                                                                                                     |

|                |                                                                                                                                                                                                                                                                                                                                                                                                                                                                                                                                                                                                                                                                                                                                                                                                                                                                                                                                                                                           |
|----------------|-------------------------------------------------------------------------------------------------------------------------------------------------------------------------------------------------------------------------------------------------------------------------------------------------------------------------------------------------------------------------------------------------------------------------------------------------------------------------------------------------------------------------------------------------------------------------------------------------------------------------------------------------------------------------------------------------------------------------------------------------------------------------------------------------------------------------------------------------------------------------------------------------------------------------------------------------------------------------------------------|
| 0787           | OVERLAP:[eEF2] <500.20.20> SIZE:2                                                                                                                                                                                                                                                                                                                                                                                                                                                                                                                                                                                                                                                                                                                                                                                                                                                                                                                                                         |
| <b>YDR385W</b> | [EFT2] Elongation factor 2 (EF-2), also encoded by EFT1; catalyzes ribosomal translocation during protein synthesis; contains diphthamide, the unique posttranslationally modified histidine residue specifically ADP-ribosylated by diphtheria toxin translation elongation factor 2 (EF-2)                                                                                                                                                                                                                                                                                                                                                                                                                                                                                                                                                                                                                                                                                              |
| YJL046W        |                                                                                                                                                                                                                                                                                                                                                                                                                                                                                                                                                                                                                                                                                                                                                                                                                                                                                                                                                                                           |
| 0788           | GO_TERM:[catalytic activity] P-Value:7.3e-02                                                                                                                                                                                                                                                                                                                                                                                                                                                                                                                                                                                                                                                                                                                                                                                                                                                                                                                                              |
| YGR175C        | [ERG1] Squalene epoxidase, catalyzes the epoxidation of squalene to 2,3-oxidosqualene; plays an essential role in the ergosterol-biosynthesis pathway and is the specific target of the antifungal drug terbinafine squalene monooxygenase Null mutant is inviable when cells are grown under aerobic conditions; erg1 null mutants are viable under anaerobic conditions during which ergosterol is taken up by the cells                                                                                                                                                                                                                                                                                                                                                                                                                                                                                                                                                                |
| YHR020W        |                                                                                                                                                                                                                                                                                                                                                                                                                                                                                                                                                                                                                                                                                                                                                                                                                                                                                                                                                                                           |
| 0789           | GO_TERM:[mitochondrial part] P-Value:1.5e-01                                                                                                                                                                                                                                                                                                                                                                                                                                                                                                                                                                                                                                                                                                                                                                                                                                                                                                                                              |
| YNL055C        | [POR1] Mitochondrial porin (voltage-dependent anion channel), outer membrane protein required for the maintenance of mitochondrial osmotic stability and mitochondrial membrane permeability porin voltage-dependent anion channel (VDAC) Null mutant is viable, shows strain-dependent delayed growth on glycerol                                                                                                                                                                                                                                                                                                                                                                                                                                                                                                                                                                                                                                                                        |
| YLR259C        | [HSP60] Tetradecameric mitochondrial chaperonin required for ATP-dependent folding of precursor polypeptides and complex assembly; prevents aggregation and mediates protein refolding after heat shock; role in mtDNA transmission; similarity to groEL chaperonin groEL homolog                                                                                                                                                                                                                                                                                                                                                                                                                                                                                                                                                                                                                                                                                                         |
| YNL085W        | [MKT1] Protein that forms a complex with Pbp1p that may mediate posttranscriptional regulation of HO endonuclease; involved in propagation of M2 dsRNA satellite of L-A virus retroviral protease signature protein                                                                                                                                                                                                                                                                                                                                                                                                                                                                                                                                                                                                                                                                                                                                                                       |
| 0790           | GO_TERM:[cytoplasmic part] P-Value:7.9e-01                                                                                                                                                                                                                                                                                                                                                                                                                                                                                                                                                                                                                                                                                                                                                                                                                                                                                                                                                |
| YDL052C        | [SLC1] 1-acyl-sn-glycerol-3-phosphate acyltransferase, catalyzes the acylation of lysophosphatidic acid to form phosphatidic acid, a key intermediate in lipid metabolism; located in lipid particles and endoplasmic reticulum 1-acyl-sn-glycerol-3-phosphate acyl transferase (putative) slc1-1 mutant suppresses sphingolipid long chain biosynthetic defect; the mutant also makes novel phosphatidylinositol derivatives and lacks sphingolipids                                                                                                                                                                                                                                                                                                                                                                                                                                                                                                                                     |
| YDR170C        | [SEC7] Guanine nucleotide exchange factor (GEF) for ADP ribosylation factors involved in proliferation of the Golgi, intra-Golgi transport and ER-to-Golgi transport; found in the cytoplasm and on Golgi-associated coated vesicles guanine nucleotide exchange protein for ARF                                                                                                                                                                                                                                                                                                                                                                                                                                                                                                                                                                                                                                                                                                          |
| 0791           | GO_TERM:[amine metabolism] P-Value:1.5e-07 OVERLAP:[Tubulins] <140.30.10> SIZE:4                                                                                                                                                                                                                                                                                                                                                                                                                                                                                                                                                                                                                                                                                                                                                                                                                                                                                                          |
| YER086W        | [ILV1] Threonine deaminase, catalyzes the first step in isoleucine biosynthesis; expression is under general amino acid control; ILV1 locus exhibits highly positioned nucleosomes; whose organization is independent of known ILV1 regulation threonine deaminase                                                                                                                                                                                                                                                                                                                                                                                                                                                                                                                                                                                                                                                                                                                        |
| YJR109C        | [CPA2] Large subunit of carbamoyl phosphate synthetase, which catalyzes a step in the synthesis of citrulline, an arginine precursor carbamyl phosphate synthetase                                                                                                                                                                                                                                                                                                                                                                                                                                                                                                                                                                                                                                                                                                                                                                                                                        |
| YKL010C        | [UFD4] Ubiquitin-protein ligase (E3) that interacts with Rpt4p and Rpt6p, two subunits of the 19S particle of the 26S proteasome; cytoplasmic E3 involved in the degradation of ubiquitin fusion proteins ubiquitin ligase e3 Null is viable; defective in proteolysis of fusion proteins containing a 'nonremovable' N-terminal ubiquitin moiety                                                                                                                                                                                                                                                                                                                                                                                                                                                                                                                                                                                                                                         |
| YLR048W        | [RPS0B] Protein component of the small (40S) ribosomal subunit, nearly identical to Rps0Ap; required for maturation of 18S rRNA along with Rps0Ap; deletion of either RPS0 gene reduces growth rate, deletion of both genes is lethal ribosomal protein S0B Null mutant is viable with significant reduction in growth rate and change in distribution and make up of ribosomes; yst1 (rps0a) yst2 (rps0b) double mutant is inviable                                                                                                                                                                                                                                                                                                                                                                                                                                                                                                                                                      |
| YOR136W        | [IDH2] Subunit of mitochondrial NAD(+)-dependent isocitrate dehydrogenase, which catalyzes the oxidation of isocitrate to alpha-ketoglutarate in the TCA cycle NAD-dependent isocitrate dehydrogenase                                                                                                                                                                                                                                                                                                                                                                                                                                                                                                                                                                                                                                                                                                                                                                                     |
| YLL040C        | [VPS13] Protein of unknown function; heterooligomeric or homooligomeric complex; peripherally associated with membranes; homologous to human COH1; involved in sporulation, vacuolar protein sorting and protein-Golgi retention                                                                                                                                                                                                                                                                                                                                                                                                                                                                                                                                                                                                                                                                                                                                                          |
| YER095W        | [RAD51] Strand exchange protein, forms a helical filament with DNA that searches for homology; involved in the recombinational repair of double-strand breaks in DNA during vegetative growth and meiosis; homolog of Dmc1p and bacterial RecA protein Rad51p colocalizes to ~ 65 spots with Dmc1p prior to synapsis (independently of ZIP1 and DMC1), and interacts with Rad52p and Rad55p; human Rad51p homolog interacts with Brca2 protein which has been implicated in causing breast cancer RecA homolog Null mutant is viable; accumulates meiosis-specific double strand breaks at a recombination hotspot and reduces the formation of physical recombinants and processed double strand breaks with long heterogeneous tails; rad51 mutants are also defective for X-ray damage repair and gene conversions; rad51 rad27 mutants are inviable. Deletion of this homologous recombination (HR) gene decreases psoralen-induced recombination and increases mutation frequencies. |
| YFR040W        | [SAP155] Protein that forms a complex with the Sit4p protein phosphatase and is required for its function; member of a family of similar proteins including Sap4p, Sap185p, and Sap190p deletion shows slight slow growth                                                                                                                                                                                                                                                                                                                                                                                                                                                                                                                                                                                                                                                                                                                                                                 |
| YDR214W        | [AHA1] Co-chaperone that binds to Hsp82p and activates its ATPase activity; similar to Hch1p; expression is regulated by stresses such as heat shock Hsp90 system cochaperone; Aha1 binds to the middle domain of Hsp90 and improves client protein activation in vivo                                                                                                                                                                                                                                                                                                                                                                                                                                                                                                                                                                                                                                                                                                                    |

|                |                                                                                                                                                                                                                                                                                                                                                                                                                                |
|----------------|--------------------------------------------------------------------------------------------------------------------------------------------------------------------------------------------------------------------------------------------------------------------------------------------------------------------------------------------------------------------------------------------------------------------------------|
| YGR234W        | [YHB1] Nitric oxide oxidoreductase, flavohemoglobin involved in nitric oxide detoxification; plays a role in the oxidative and nitrosative stress responses flavohemoglobin Null mutant is viable. A rho+ strain carrying a yhb1(-) deletion has normal levels of both cyanide-sensitive and cyanide-insensitive respiration. Cells that carry a yhb1(-) deletion are sensitive to conditions that promote oxidative stress.   |
| YKL211C        | [TRP3] Bifunctional enzyme exhibiting both indole-3-glycerol-phosphate synthase and anthranilate synthase activities, forms multifunctional hetero-oligomeric anthranilate synthase:indole-3-glycerol phosphate synthase enzyme complex with Trp2p anthranilate synthase component II indole-3-phosphate Null mutant is viable, tryptophan auxotroph                                                                           |
| YHR019C        | [DED81] Cytosolic asparaginyl-tRNA synthetase, required for protein synthesis, catalyzes the specific attachment of asparagine to its cognate tRNA asparaginyl-tRNA synthetase                                                                                                                                                                                                                                                 |
| YIL094C        | [LYS12] Homo-isocitrate dehydrogenase, an NAD-linked mitochondrial enzyme required for the fourth step in the biosynthesis of lysine, in which homo-isocitrate is oxidatively decarboxylated to alpha-ketoadipate homo-isocitrate dehydrogenase Null mutant is viable but shows decreased growth in the absence of lysine                                                                                                      |
| YLR153C        | [ACS2] Acetyl-coA synthetase isoform, required for growth on glucose; expressed under anaerobic conditions acetyl CoA synthetase Null mutant is viable, and grows on ethanol or acetate as sole carbon source, but is unable to grow on glucose as sole carbon source; acs1 acs2 double null mutant is inviable                                                                                                                |
| YFR009W        | [GCN20] Positive regulator of the Gcn2p kinase activity, forms a complex with Gcn1p; proposed to stimulate Gcn2p activation by an uncharged tRNA ATP-binding cassette (ABC) family Null mutant is viable and shows impaired derepression of GCN4 translation and reduced levels of eIF-2 alpha phosphorylation                                                                                                                 |
| YOR133W        | [EFT1] Elongation factor 2 (EF-2), also encoded by EFT2; catalyzes ribosomal translocation during protein synthesis; contains diphthamide, the unique posttranslationally modified histidine residue specifically ADP-ribosylated by diphtheria toxin translation elongation factor 2 (EF-2)                                                                                                                                   |
| YDR127W        | [ARO1] Pentafunctional arom protein, catalyzes steps 2 through 6 in the biosynthesis of chorismate, which is a precursor to aromatic amino acids 3-dehydroquinate dehydratase (3-dehydroquinase) 3-dehydroquinate synthase epsd synthase pentafunctional arom polypeptide shikimate 5-dehydrogenase shikimate kinase aromatic amino acid requiring; lack of premeiotic DNA synthesis; blocked sporulation in homozygous mutant |
| YKL104C        | [GFA1] Glutamine-fructose-6-phosphate amidotransferase, catalyzes the formation of glucosamine-6-P and glutamate from fructose-6-P and glutamine in the first step of chitin biosynthesis glucoseamine-6-phosphate synthase glutamine_fructose-6-phosphate amidotransferase Null mutant is viable, glucosamine auxotroph                                                                                                       |
| YGL195W        | [GCN1] Positive regulator of the Gcn2p kinase activity, forms a complex with Gcn20p; proposed to stimulate Gcn2p activation by an uncharged tRNA translational activator of GCN4 through activation of GCN2 in response to starvation Null mutant is viable and sensitive to 3-aminotriazole                                                                                                                                   |
| <b>YFL037W</b> | [TUB2] Beta-tubulin; associates with alpha-tubulin (Tub1p and Tub3p) to form tubulin dimer, which polymerizes to form microtubules beta-tubulin null is inviable; conditional mutants show block of mitotic nuclear migration and chromosome segregation and defects in spindle and/or cytoplasmic microtubules at non-permissive conditions; some mutants are benomyl-hypersensitive                                          |
| <b>YML085C</b> | [TUB1] Alpha-tubulin; associates with beta-tubulin (Tub2p) to form tubulin dimer, which polymerizes to form microtubules alpha-tubulin Null mutant is inviable; heterozygous tub1 null diploids are slow growing and sporulate poorly                                                                                                                                                                                          |
| <b>YML124C</b> | [TUB3] Alpha-tubulin; associates with beta-tubulin (Tub2p) to form tubulin dimer, which polymerizes to form microtubules; expressed at lower level than Tub1p alpha-tubulin Null mutant is viable, hypersensitive to benomyl, exhibits poor spore viability                                                                                                                                                                    |
| YDL055C        | [PSA1] GDP-mannose pyrophosphorylase (mannose-1-phosphate guanyltransferase), synthesizes GDP-mannose from GTP and mannose-1-phosphate in cell wall biosynthesis; required for normal cell wall structure GDP-mannose pyrophosphorylase mannose-1-phosphate guanyltransferase                                                                                                                                                  |
| YKL029C        | [MAE1] Mitochondrial malic enzyme, catalyzes the oxidative decarboxylation of malate to pyruvate, which is a key intermediate in sugar metabolism and a precursor for synthesis of several amino acids malic enzyme null mutant exhibits no malic enzyme activity and synthetic phenotypes with pyk1 and pyk2 mutations                                                                                                        |
| YLR180W        | [SAM1] S-adenosylmethionine synthetase, catalyzes transfer of the adenosyl group of ATP to the sulfur atom of methionine; one of two differentially regulated isozymes (Sam1p and Sam2p)                                                                                                                                                                                                                                       |
| 0792           | GO_TERM:[transcription factor TFIIC complex] P-Value:7.5e-16 OVERLAP:[TFIIC] <510.150> SIZE:5                                                                                                                                                                                                                                                                                                                                  |
| <b>YAL001C</b> | [TFC3] Largest of six subunits of the RNA polymerase III transcription initiation factor complex (TFIIC); part of the TauB domain of TFIIC that binds DNA at the BoxB promoter sites of tRNA and similar genes; cooperates with Tfc6p in DNA binding transcription factor tau (TFIIC) subunit                                                                                                                                  |
| <b>YOR110W</b> | [TFC7] One of six subunits of the RNA polymerase III transcription initiation factor complex (TFIIC); part of the TauA globular domain of TFIIC that binds DNA at the BoxA promoter sites of tRNA and similar genes TFIIC (tau55) 55 kDa subunit                                                                                                                                                                               |
| <b>YDR362C</b> | [TFC6] One of six subunits of RNA polymerase III transcription initiation factor complex (TFIIC); part of TFIIC TauB domain that binds BoxB promoter sites of tRNA and other genes; cooperates with Tfc3p in DNA binding; human homolog is TFIIC-110 91 kDa tau91 subunit of transcription factor IIC (TFIIC)                                                                                                                  |
| <b>YBR123C</b> | [TFC1] One of six subunits of the RNA polymerase III transcription initiation factor complex (TFIIC); part of the TauA globular domain of TFIIC that binds DNA at the BoxA promoter sites of tRNA and similar genes; human homolog is TFIIC-63 95 kDa transcription factor tau (TFIIC) subunit lethal                                                                                                                          |
| YPL007C        | [TFC8] One of six subunits of RNA polymerase III transcription initiation factor complex (TFIIC); part of TFIIC TauB domain that binds BoxB promoter sites of tRNA and other genes; linker between TauB and TauA domains; human homolog is TFIIC-90 TFIIC (tau60) 60 kDa subunit                                                                                                                                               |
| 0793           | GO_TERM:[mRNA cleavage factor complex] P-Value:2.0e-46 OVERLAP:[pre mRNA3'-end processing factor CFII] <440.1020> SIZE:4                                                                                                                                                                                                                                                                                                       |
| YHR029C        | [YHI9] Protein of unknown function that is a member of the PhzF superfamily, although unlike its bacterial homolog, is most likely not involved in phenazine production; possibly involved in a membrane regulation metabolic pathway                                                                                                                                                                                          |

|                |                                                                                                                                                                                                                                                                                                                                                                                                                                                                                                                                                           |
|----------------|-----------------------------------------------------------------------------------------------------------------------------------------------------------------------------------------------------------------------------------------------------------------------------------------------------------------------------------------------------------------------------------------------------------------------------------------------------------------------------------------------------------------------------------------------------------|
| YBR175W        | [SWD3] Essential subunit of the COMPASS (Set1C) complex, which methylates histone H3 on lysine 4 and is required in transcriptional silencing near telomeres; WD40 beta propeller superfamily member and ortholog of mammalian WDR5 compass (complex proteins associated with Set1p) component Null: defective in silencing of expression of genes located near telomeres; hydroxyurea sensitive.                                                                                                                                                         |
| YPL138C        | [SPP1] Subunit of COMPASS (Set1C), a complex which methylates histone H3 on lysine 4 and is required in telomeric transcriptional silencing; PHD finger domain protein similar to human CGBP, an unmethylated CpG binding protein compass (complex proteins associated with Set1p) component Null: defective in silencing of expression of genes located near telomeres; hydroxyurea sensitive.                                                                                                                                                           |
| YAR003W        | [SWD1] Subunit of the COMPASS (Set1C) complex, which methylates histone H3 on lysine 4 and is required in transcriptional silencing near telomeres; WD40 beta propeller superfamily member with similarity to mammalian Rbbp7 compass (complex proteins associated with Set1p) component Null: defective in silencing of expression of genes located near telomeres; hydroxyurea sensitive.                                                                                                                                                               |
| YDR469W        | [SDC1] Subunit of the COMPASS (Set1C) complex, which methylates histone H3 on lysine 4 and is required in transcriptional silencing near telomeres; has similarity to <i>C. elegans</i> Dpy-30 compass (complex proteins associated with Set1p) component Null: defective in silencing of expression of genes located near telomeres; hydroxyurea sensitive.                                                                                                                                                                                              |
| YLR015W        | [BRE2] Subunit of the COMPASS (Set1C) complex, which methylates histone H3 on lysine 4 and is required in transcriptional silencing near telomeres; involved in telomere maintenance; similar to trithorax-group protein ASH2L compass (complex proteins associated with Set1p) component Null: null mutant is sensitive to brefeldin A                                                                                                                                                                                                                   |
| YBR258C        | [SHG1] Subunit of the COMPASS (Set1C) complex, which methylates histone H3 on lysine 4 and is required in transcriptional silencing near telomeres compass (complex proteins associated with Set1p) component                                                                                                                                                                                                                                                                                                                                             |
| YHR119W        | [SET1] Histone methyltransferase, subunit of the COMPASS (Set1C) complex which methylates histone H3 on lysine 4; required in transcriptional silencing near telomeres and at the silent mating type loci; contains a SET domain Null mutant is viable, exhibits derepression of silenced genes at telomeres and the HML silent mating-type locus                                                                                                                                                                                                         |
| YLR448W        | [RPL6B] Protein component of the large (60S) ribosomal subunit, has similarity to Rpl6Bp and to rat L6 ribosomal protein; binds to 5.8S rRNA ribosomal protein L6B (L17B) (rp18) (YL16) Null mutant is viable, grows slower than wild-type. rpl6a rpl6b double mutants are inviable; rpl6 mutants are deficient in 60S ribosomal subunits relative to 40S subunits; 43S preinitiation complexes accumulate in half-mer polyribosomes in the absence of sufficient 60S subunits.                                                                           |
| YOR250C        | [CLP1] Subunit of cleavage factor I (CFI), involved in both the endonucleolytic cleavage and polyadenylation steps of mRNA 3'-end maturation cleavage and polyadenylation factor CF I component involved in pre-mRNA 3'-end processing                                                                                                                                                                                                                                                                                                                    |
| YGL044C        | [RNA15] Cleavage and polyadenylation factor I (CF I) component involved in cleavage and polyadenylation of mRNA 3' ends; interacts with the A-rich polyadenylation signal in complex with Rna14p and Hrp1p cleavage and polyadenylation factor CF I component involved in pre-mRNA 3'-end processing                                                                                                                                                                                                                                                      |
| YGR047C        | [TFC4] One of six subunits of the RNA polymerase III transcription initiation factor complex (TFIIIC); part of the TauA domain of TFIIIC that binds BoxA DNA promoter sites of tRNA and similar genes; has TPR motifs; human homolog is TFIIC-102 131 kDa transcription factor tau (TFIIIC) subunit                                                                                                                                                                                                                                                       |
| YOR179C        | [SYC1] Subunit of the APT subcomplex of cleavage and polyadenylation factor, may have a role in 3' end formation of both polyadenylated and non-polyadenylated RNAs                                                                                                                                                                                                                                                                                                                                                                                       |
| YPL008W        | [CHL1] Conserved nuclear protein required to establish sister-chromatid pairing during S-phase, probable DNA helicase with similarity to human BACH1, which associates with tumor suppressor BRCA1; associates with acetyltransferase Ctf7p deah box protein kinetochore protein Null mutant is viable, ts mutants mis-segregate chromosomes at permissive temperature leading to increased rate of mitotic chromosome loss, at non-permissive temperature ts mutants transiently arrest as large-budded cells with G(sub)2 DNA content and short spindle |
| YDR228C        | [PCF11] mRNA 3' end processing factor, essential component of cleavage and polyadenylation factor IA (CF IA), involved in pre-mRNA 3' end processing and in transcription termination; binds C-terminal domain of largest subunit of RNA pol II (Rpo21p) cleavage and polyadenylation factor CF I component involved in pre-mRNA 3'-end processing Null mutant is inviable; pcf11 (ts) mutations are synthetically lethal with rna14 (ts) and rna15 (ts) mutations                                                                                        |
| YER133W        | [GLC7] Catalytic subunit of type I serine/threonine protein phosphatase, involved in many processes including glycogen metabolism, sporulation, and mitosis; interacts with multiple regulatory subunits; predominantly isolated with Sds22p protein phosphatase type I                                                                                                                                                                                                                                                                                   |
| YMR061W        | [RNA14] Cleavage and polyadenylation factor I (CF I) component involved in cleavage and polyadenylation of mRNA 3' ends; bridges interaction between Rna15p and Hrp1p in the CF I complex cleavage and polyadenylation factor CF I component involved in pre-mRNA 3'-end processing                                                                                                                                                                                                                                                                       |
| <b>YAL043C</b> | [PTA1] Subunit of holo-CPF, a multiprotein complex and functional homolog of mammalian CPSF, required for the cleavage and polyadenylation of mRNA and snoRNA 3' ends; involved in pre-tRNA processing; binds to the phosphorylated CTD of RNAPII cleavage factor II (CF II) component polyadenylation factor I (PF I) Null mutant is inviable; temperature-sensitive mutant shows defects in pre-tRNA processing                                                                                                                                         |
| <b>YDR301W</b> | [CFT1] RNA-binding subunit of the mRNA cleavage and polyadenylation factor; involved in poly(A) site recognition and required for both pre-mRNA cleavage and polyadenylation, 51% sequence similarity with mammalian AAUAA-binding subunit of CPSF 150 kDa protein associated with polyadenylation factor I (PF I) cleavage factor II (CF II) component                                                                                                                                                                                                   |
| YNL317W        | [PFS2] Integral subunit of the pre-mRNA cleavage and polyadenylation factor (CPF) complex; plays an essential role in mRNA 3'-end formation by bridging different processing factors and thereby promoting the assembly of the processing complex polyadenylation factor I (PF I) Null mutant is inviable; conditionally lethal mutations exhibit defects in 3'-end processing in vitro                                                                                                                                                                   |
| YKL018W        | [SWD2] Subunit of the COMPASS (Set1C) complex, which methylates histone H3 on lys 4 and is involved in telomeric silencing; subunit of CPF (cleavage and polyadenylation factor), a complex involved in RNAP II transcription termination compass (complex proteins associated with Set1p) component                                                                                                                                                                                                                                                      |
| YJR093C        | [FIP1] Subunit of cleavage polyadenylation factor (CPF), interacts directly with poly(A) polymerase (Pap1p) to regulate its activity polyadenylation factor I (PF I) Null mutant is inviable. At restrictive temperature, a temperature-sensitive mutant shows shortening of poly(A) tails                                                                                                                                                                                                                                                                |
| <b>YLR277C</b> | [YSH1] Putative endonuclease, subunit of the mRNA cleavage and polyadenylation specificity complex required for 3' processing of mRNAs cleavage factor II (CF II) component polyadenylation factor I (PF I)                                                                                                                                                                                                                                                                                                                                               |
| YKR002W        | [PAP1] Poly(A) polymerase, one of three factors required for mRNA 3'-end polyadenylation, forms multiprotein complex with polyadenylation factor I (PF I), also required for mRNA nuclear export; may also polyadenylate rRNAs poly(A) polymerase lethal                                                                                                                                                                                                                                                                                                  |
| YPR107C        | [YTH1] Essential RNA-binding component of cleavage and polyadenylation factor, contains five zinc fingers; required for pre-mRNA 3'-end processing and polyadenylation polyadenylation factor subunit null is inviable; other mutations result in polyadenylation deficiency                                                                                                                                                                                                                                                                              |

|                |                                                                                                                                                                                                                                                                                                                                                                                                                           |
|----------------|---------------------------------------------------------------------------------------------------------------------------------------------------------------------------------------------------------------------------------------------------------------------------------------------------------------------------------------------------------------------------------------------------------------------------|
| YNL222W        | [SSU72] Transcription/RNA-processing factor that associates with TFIIB and cleavage/polyadenylation factor Pta1p; exhibits phosphatase activity on serine-5 of the RNA polymerase II C-terminal domain; affects start site selection in vivo                                                                                                                                                                              |
| <b>YLR115W</b> | [CFT2] Subunit of the mRNA cleavage and polyadenylation factor (CPF); required for pre-mRNA cleavage, polyadenylation and poly(A) site recognition, 43% similarity with the mammalian CPSF-100 protein. 105 kDa protein associated with polyadenylation factor 1 (PF I)/cleavage factor II (CF II) component                                                                                                              |
| YKL059C        | [MPE1] Essential conserved subunit of CPF (cleavage and polyadenylation factor), plays a role in 3' end formation of mRNA via the specific cleavage and polyadenylation of pre-mRNA, contains a putative RNA-binding zinc knuckle motif                                                                                                                                                                                   |
| YDR195W        | [REF2] RNA-binding protein involved in the cleavage step of mRNA 3'-end formation prior to polyadenylation, and in snoRNA maturation; part of holo-CPF subcomplex APT, which associates with 3'-ends of snoRNA- and mRNA-encoding genes RNA-binding protein                                                                                                                                                               |
| YGR156W        | [PTI1] Pta1p Interacting protein                                                                                                                                                                                                                                                                                                                                                                                          |
| 0794           | GO_TERM:[mRNA 3'-end processing] P-Value:5.4e-07                                                                                                                                                                                                                                                                                                                                                                          |
| YGR178C        | [PBP1] Protein interacting with poly(A)-binding protein Pab1p; likely involved in controlling the extent of mRNA polyadenylation; forms a complex with Mkt1p that may regulate HO translation; interacts with Lsm12p in a copurification assay Null mutant is viable; other mutant suppresses pab1 null mutant.                                                                                                           |
| YGL094C        | [PAN2] Essential subunit of the Pan2p-Pan3p poly(A)-ribonuclease complex, which acts to control poly(A) tail length and regulate the stoichiometry and activity of postreplication repair complexes poly(A) ribonuclease 135 kDa subunit Null mutant is viable but shows an increase in average length of mRNA poly(A) tails and a loss of Pab1p-stimulated poly(A) ribonuclease activity in vitro                        |
| YKL025C        | [PAN3] Essential subunit of the Pan2p-Pan3p poly(A)-ribonuclease complex, which acts to control poly(A) tail length and regulate the stoichiometry and activity of postreplication repair complexes Pab1p-dependent poly(A) ribonuclease (PAN) 76 kDa subunit Null mutant is viable but lacks Pab1p-dependent poly(A) ribonuclease activity in vitro; Tn3 insertion into PAN3 causes hypersensitivity to calcofluor white |
| 0795           | GO_TERM:[regulation of transcription by galactose] P-Value:7.7e-09 OVERLAP:[GAL80 complex] <510.190.80> SIZE:3                                                                                                                                                                                                                                                                                                            |
| YBR020W        | [GAL1] Galactokinase, phosphorylates alpha-D-galactose to alpha-D-galactose-1-phosphate in the first step of galactose catabolism; expression regulated by Gal4p galactokinase Null mutant is viable and cannot utilize galactose.                                                                                                                                                                                        |
| <b>YDR009W</b> | [GAL3] Transcriptional regulator involved in activation of the GAL genes in response to galactose; forms a complex with Gal80p and Gal4p to relieve inhibition by Gal80p; binds galactose and ATP but does not have galactokinase activity Galactose non-utilizer                                                                                                                                                         |
| <b>YML051W</b> | [GAL80] Transcriptional regulator involved in the repression of GAL genes in the absence of galactose; inhibits transcriptional activation by Gal4p; inhibition relieved by Gal3p or Gal1p binding transcriptional regulator Null mutant is viable but has constitutive expression of the GAL genes.                                                                                                                      |
| 0796           | GO_TERM:[biological_process] P-Value:9.2e-02                                                                                                                                                                                                                                                                                                                                                                              |
| YFL052W        |                                                                                                                                                                                                                                                                                                                                                                                                                           |
| YJL125C        | [GCD14] Subunit of tRNA (1-methyladenosine) methyltransferase, with Gcd10p, required for the modification of the adenine at position 58 in tRNAs, especially tRNA <sup>i</sup> -Met; first identified as a negative regulator of GCN4 expression subunit of tRNA(1-methyladenosine) methyltransferase, along with Gcd10p 3-Aminotriazole resistance; unconditional slow growth                                            |
| YBL067C        | [UBP13] Putative ubiquitin-specific protease ubiquitin carboxyl-terminal hydrolase                                                                                                                                                                                                                                                                                                                                        |
| YER030W        | [YER030W] Putative chaperone for Htz1p/H2A-H2B dimer chaperone                                                                                                                                                                                                                                                                                                                                                            |
| 0797           | OVERLAP:[cytoplasmic ribosomal large subunit] <500.40.10> SIZE:81                                                                                                                                                                                                                                                                                                                                                         |
| <b>YER117W</b> | [RPL23B] Protein component of the large (60S) ribosomal subunit, identical to Rpl23Ap and has similarity to E. coli L14 and rat L23 ribosomal proteins ribosomal protein L23B (L17aB) (YL32)                                                                                                                                                                                                                              |
| YDR361C        | [BCP1] Essential protein involved in nuclear export of Mss4p, which is a lipid kinase that generates phosphatidylinositol 4,5-bisphosphate and plays a role in actin cytoskeleton organization and vesicular transport                                                                                                                                                                                                    |
| YPL208W        | [RKM1] SET-domain lysine-N-methyltransferase, catalyzes the formation of dimethyllysine residues on the large ribosomal subunit protein L23a (RPL23A and RPL23B) methyltransferase                                                                                                                                                                                                                                        |
| 0798           | GO_TERM:[protein deubiquitination] P-Value:2.1e-03                                                                                                                                                                                                                                                                                                                                                                        |
| YMR173W        | [DDR48] DNA damage-responsive protein, expression is increased in response to heat-shock stress or treatments that produce DNA lesions; contains multiple repeats of the amino acid sequence NNDSYGS flocculent specific protein Null mutant is viable, displays reduced spontaneous mutation rate                                                                                                                        |
| YDL066W        | [IDP1] Mitochondrial NADP-specific isocitrate dehydrogenase, catalyzes the oxidation of isocitrate to alpha-ketoglutarate; not required for mitochondrial respiration and may function to divert alpha-ketoglutarate to biosynthetic processes NADP-dependent isocitrate dehydrogenase                                                                                                                                    |

|                |                                                                                                                                                                                                                                                                                                                                                                                                                                                                                                                                                                             |
|----------------|-----------------------------------------------------------------------------------------------------------------------------------------------------------------------------------------------------------------------------------------------------------------------------------------------------------------------------------------------------------------------------------------------------------------------------------------------------------------------------------------------------------------------------------------------------------------------------|
| YER151C        | [UBP3] Ubiquitin-specific protease that interacts with Bre5p to co-regulate anterograde and retrograde transport between endoplasmic reticulum and Golgi compartments; inhibitor of gene silencing; cleaves ubiquitin fusions but not polyubiquitin ubiquitin-specific protease Null mutant is viable. Null yuh1 ubp1 ubp2 ubp3 quadruple mutants are viable and retain the ability to deubiquitinate ubiquitin fusions. Deletion of the UB3 gene results in markedly improved silencing of genes inserted either near a telomere or at one of the silent mating type loci. |
| YDR126W        | [SWF1] Palmitoyltransferase that acts on the SNAREs Snc1p, Syn8p, Tlg1p and likely on all SNAREs; member of a family of putative palmitoyltransferases containing an Asp-His-His-Cys-cysteine rich (DHHC-CRD) domain; may have a role in vacuole fusion Proflin synthetic lethal                                                                                                                                                                                                                                                                                            |
| YHR039C        | [MSC7] Protein of unknown function, green fluorescent protein (GFP)-fusion protein localizes to the endoplasmic reticulum; msc7 mutants are defective in directing meiotic recombination events to homologous chromatids                                                                                                                                                                                                                                                                                                                                                    |
| YNR051C        | [BRE5] Ubiquitin protease cofactor, forms deubiquitination complex with Ubp3p that coregulates anterograde and retrograde transport between the endoplasmic reticulum and Golgi compartments; null is sensitive to brefeldin A                                                                                                                                                                                                                                                                                                                                              |
| 0799           | GO_TERM:[organelle part] P-Value:9.8e-01 OVERLAP:[cytoplasmic ribosomal large subunit] <500.40.10> SIZE:81                                                                                                                                                                                                                                                                                                                                                                                                                                                                  |
| <b>YIL148W</b> | [RPL40A] Fusion protein, identical to Rpl40Bp, that is cleaved to yield ubiquitin and a ribosomal protein of the large (60S) ribosomal subunit with similarity to rat L40; ubiquitin may facilitate assembly of the ribosomal protein into ribosomes also encodes a ubiquitin protein/ribosomal protein L40A                                                                                                                                                                                                                                                                |
| YNL111C        | [CYB5] Cytochrome b5, involved in the sterol and lipid biosynthesis pathways; required for sterol C5-6 and fatty acid desaturation cytochrome b5 Null mutant is viable, cyb5 mutations suppress ketoconazole hypersensitivity of a P450 reductase deficient strain                                                                                                                                                                                                                                                                                                          |
| 0800           | GO_TERM:[eukaryotic translation initiation factor 4F complex] P-Value:1.9e-04 OVERLAP:[eIF4A] <500.10.50> SIZE:2                                                                                                                                                                                                                                                                                                                                                                                                                                                            |
| YGR198W        |                                                                                                                                                                                                                                                                                                                                                                                                                                                                                                                                                                             |
| YLR380W        | [CSR1] Phosphatidylinositol transfer protein with a potential role in lipid turnover; interacts specifically with thioredoxin peroxidase (Tsa2p) and may have a role in oxidative stress resistance                                                                                                                                                                                                                                                                                                                                                                         |
| YPL207W        | [TYW1] Hypothetical protein                                                                                                                                                                                                                                                                                                                                                                                                                                                                                                                                                 |
| YDR239C        |                                                                                                                                                                                                                                                                                                                                                                                                                                                                                                                                                                             |
| YLR023C        | [IZH3] Membrane protein involved in zinc metabolism, member of the four-protein IZH family, expression induced by zinc deficiency; deletion reduces sensitivity to elevated zinc and shortens lag phase, overexpression reduces Zap1p activity                                                                                                                                                                                                                                                                                                                              |
| YOR287C        |                                                                                                                                                                                                                                                                                                                                                                                                                                                                                                                                                                             |
| <b>YJL138C</b> | [TIF2] Translation initiation factor eIF4A, identical to Tif1p; DEA(D/H)-box RNA helicase that couples ATPase activity to RNA binding and unwinding; forms a dumbbell structure of two compact domains connected by a linker; interacts with eIF4G translation initiation factor eIF4A subunit viable, tif1tif2 double mutant is lethal                                                                                                                                                                                                                                     |
| <b>YKR059W</b> | [TIF1] Translation initiation factor eIF4A, identical to Tif2p; DEA(D/H)-box RNA helicase that couples ATPase activity to RNA binding and unwinding; forms a dumbbell structure of two compact domains connected by a linker; interacts with eIF4G translation initiation factor eIF4A subunit viable, tif1tif2 double mutant is lethal                                                                                                                                                                                                                                     |
| 0801           | GO_TERM:[molecular_function] P-Value:3.7e-01                                                                                                                                                                                                                                                                                                                                                                                                                                                                                                                                |
| YJL010C        | [YJL010C] Essential nucleolar protein required for 18S rRNA synthesis                                                                                                                                                                                                                                                                                                                                                                                                                                                                                                       |
| YGR071C        |                                                                                                                                                                                                                                                                                                                                                                                                                                                                                                                                                                             |
| YHR109W        | [CTM1] Cytochrome c lysine methyltransferase, trimethylates residue 72 of apo-cytochrome c (Cyc1p) in the cytosol; not required for normal respiratory growth cytochrome c methyltransferase lack of trimethylation of cytochrome C Lys72                                                                                                                                                                                                                                                                                                                                   |
| 0802           | GO_TERM:[cellular process] P-Value:4.2e-01                                                                                                                                                                                                                                                                                                                                                                                                                                                                                                                                  |
| YHR211W        | [FLO5] Lectin-like protein involved in flocculation, cell wall protein that binds to mannose chains on the surface of other cells, confers flocc-forming ability that is chymotrypsin resistant but heat labile; similar to Flo1p flocculin[similar to flocculation protein Flo1p Mutations in FLO5 appear to have no effect on filamentous growth.                                                                                                                                                                                                                         |
| YOR360C        | [PDE2] High-affinity cyclic AMP phosphodiesterase, component of the cAMP-dependent protein kinase signaling system, protects the cell from extracellular cAMP, contains readthrough motif surrounding termination codon high affinity cAMP phosphodiesterase null suppresses the heat-shock and starvation phenotypes of ras2Val119 mutation and of the ras1 ras2 double mutant; null by itself shows slow growth in presence of external cAMP, and is thermo-sensitive when nitrogen-starved in presence of cAMP                                                           |
| 0803           | GO_TERM:[transcription termination from Pol II promoter, RNA polymerase(A) coupled] P-Value:3.0e-05 OVERLAP:[rRNA splicing] <440.30.20> SIZE:24                                                                                                                                                                                                                                                                                                                                                                                                                             |
| YDR289C        | [RTT103] Protein that interacts with exonuclease Rat1p and Rai1p and plays a role in transcription termination by RNA polymerase II, has an RPR domain (carboxy-terminal domain interacting domain); also involved in regulation of Ty1 transposition Gene disruption causes Ty1 hypertransposition phenotype                                                                                                                                                                                                                                                               |
| <b>YOR048C</b> | [RAT1] Nuclear 5' to 3' single-stranded RNA exonuclease, involved in RNA metabolism, including rRNA and snRNA processing as well as mRNA transcription termination 5'-3' exoribonuclease                                                                                                                                                                                                                                                                                                                                                                                    |

|                         |                                                                                                                                                                                                                                                                                                                                                                                                                                                                                                                                                                                                          |
|-------------------------|----------------------------------------------------------------------------------------------------------------------------------------------------------------------------------------------------------------------------------------------------------------------------------------------------------------------------------------------------------------------------------------------------------------------------------------------------------------------------------------------------------------------------------------------------------------------------------------------------------|
| 0804                    | GO_TERM:[catalytic activity] P-Value:1.8e-01                                                                                                                                                                                                                                                                                                                                                                                                                                                                                                                                                             |
| YNR064C                 |                                                                                                                                                                                                                                                                                                                                                                                                                                                                                                                                                                                                          |
| YGL157W                 |                                                                                                                                                                                                                                                                                                                                                                                                                                                                                                                                                                                                          |
| YMR034C                 |                                                                                                                                                                                                                                                                                                                                                                                                                                                                                                                                                                                                          |
| 0805                    | GO_TERM:[translation initiation factor activity] P-Value:3.6e-15 OVERLAP:[eIF2B] <500.10.30> SIZE:5                                                                                                                                                                                                                                                                                                                                                                                                                                                                                                      |
| YBR227C                 | [MCX1] Mitochondrial ATP-binding protein, possibly a mitochondrial chaperone with non-proteolytic function; similar to bacterial ClpX proteins ATP-binding protein similar to ClpX                                                                                                                                                                                                                                                                                                                                                                                                                       |
| YER186C                 |                                                                                                                                                                                                                                                                                                                                                                                                                                                                                                                                                                                                          |
| YMR269W                 | [YMR269W] Nucleolar protein of unknown function, identified in proteomic screens of ribosomal complexes null has both reduced growth and reduced protein synthesis rates                                                                                                                                                                                                                                                                                                                                                                                                                                 |
| YDR444W                 |                                                                                                                                                                                                                                                                                                                                                                                                                                                                                                                                                                                                          |
| YGL064C                 | [MRH4] Mitochondrial RNA helicase, plays an essential role in mitochondrial function mitochondrial DEAD box RNA helicase Null: viable, slow growth, respiratory deficient                                                                                                                                                                                                                                                                                                                                                                                                                                |
| YDR021W                 | [FAL1] Nucleolar protein required for maturation of 18S rRNA, member of the eIF4A subfamily of DEAD-box ATP-dependent RNA helicases RNA helicase (putative) dead box protein Null mutant is inviable; when Fallp is depleted, either in a temperature-sensitive fall-1 mutant or in glucose medium when Fallp is under a gal promoter, there is a decrease in 40S ribosomal subunits, and those strains are sensitive to paromomycin and neomycin                                                                                                                                                        |
| YGR194C                 | [XKS1] Xylulokinase, converts D-xylulose and ATP to xylulose 5-phosphate and ADP; rate limiting step in fermentation of xylulose; required for xylose fermentation by recombinant S. cerevisiae strains xylulokinase Null mutant is viable and cannot grow on media containing xylulose as the sole carbon source                                                                                                                                                                                                                                                                                        |
| YER025W                 | [GCD11] Gamma subunit of the translation initiation factor eIF2, involved in the identification of the start codon; binds GTP when forming the ternary complex with GTP and tRNAi-Met translational initiation factor eIF-2 gamma subunit Null mutant is inviable, gcd11 mutants have slower growth rate under nonstarvation conditions                                                                                                                                                                                                                                                                  |
| <a href="#">YKR026C</a> | [GCN3] Alpha subunit of the translation initiation factor eIF2B, the guanine-nucleotide exchange factor for eIF2; activity subsequently regulated by phosphorylated eIF2; first identified as a positive regulator of GCN4 expression eIF2B 34 kDa alpha subunit null mutants fail to derepress amino acid-regulated genes under conditions of amino acid starvation                                                                                                                                                                                                                                     |
| YNL265C                 | [IST1] Putative translation initiation factor, as suggested by computational analysis of large-scale protein-protein interaction data                                                                                                                                                                                                                                                                                                                                                                                                                                                                    |
| <a href="#">YLR291C</a> | [GCD7] Beta subunit of the translation initiation factor eIF2B, the guanine-nucleotide exchange factor for eIF2; activity subsequently regulated by phosphorylated eIF2; first identified as a negative regulator of GCN4 expression negative regulator of GCN4 expression translation initiation factor eIF2B subunit Null mutant is inviable; non-null mutants exhibit an increase in GCN4 translation                                                                                                                                                                                                 |
| YPL237W                 | [SUI3] Beta subunit of the translation initiation factor eIF2, involved in the identification of the start codon; proposed to be involved in mRNA binding translation initiation factor eIF-2 beta subunit suppression of initiator codon mutations                                                                                                                                                                                                                                                                                                                                                      |
| YJR007W                 | [SUI2] Alpha subunit of the translation initiation factor eIF2, involved in the identification of the start codon; phosphorylation of Ser51 is required for regulation of translation by inhibiting the exchange of GDP for GTP Translation initiation factor eIF-2 alpha subunit suppression of initiator codon mutations                                                                                                                                                                                                                                                                               |
| <a href="#">YOR260W</a> | [GCD1] Gamma subunit of the translation initiation factor eIF2B, the guanine-nucleotide exchange factor for eIF2; activity subsequently regulated by phosphorylated eIF2; first identified as a negative regulator of GCN4 expression gamma subunit negative regulator in the general control of amino acid biosynthesis translation initiation factor eIF2B subunit affect growth rate under nonstarvation conditions                                                                                                                                                                                   |
| <a href="#">YDR211W</a> | [GCD6] Catalytic epsilon subunit of the translation initiation factor eIF2B, the guanine-nucleotide exchange factor for eIF2; activity subsequently regulated by phosphorylated eIF2; first identified as a negative regulator of GCN4 expression translation initiation factor eIF-2B epsilon subunit Null mutant is inviable; non-null mutations increase GCN4 translation                                                                                                                                                                                                                             |
| <a href="#">YGR083C</a> | [GCD2] Delta subunit of the translation initiation factor eIF2B, the guanine-nucleotide exchange factor for eIF2; activity subsequently regulated by phosphorylated eIF2; first identified as a negative regulator of GCN4 expression 71 kDa subunit (delta) translation initiation factor eIF2B subunit translational repressor of GCN4 protein Null mutant is inviable; resistance to 5-methyltryptophan, 5-fluorotryptophan and canavanine; override requirement for GCN2 and GCN3 gene products for derepression of GCN4 constitutive derepression and slow growth; temperature sensitive for growth |
| 0806                    | GO_TERM:[translational termination] P-Value:1.6e-04                                                                                                                                                                                                                                                                                                                                                                                                                                                                                                                                                      |
| YBR143C                 | [SUP45] Polypeptide release factor involved in translation termination; mutant form acts as a recessive omnipotent suppressor eRF1 (eukaryotic Release Factor 1) homolog The null mutant is inviable. Other mutant alleles produce a variety of phenotypes which can include: omnipotent nonsense suppression, osmotic sensitivity, benomyl sensitivity, paromomycin sensitivity, and novobiocin resistance.                                                                                                                                                                                             |
| YML068W                 | [ITT1] Protein that modulates the efficiency of translation termination, interacts with translation release factors eRF1 (Sup45p) and eRF3 (Sup35p) in vitro, contains a zinc finger domain characteristic of the TRIAD class of proteins                                                                                                                                                                                                                                                                                                                                                                |
| YER120W                 | [SCS2] Integral ER membrane protein that regulates phospholipid metabolism via an interaction with the FFAT motif of Opi1p, also involved in telomeric silencing, disruption causes inositol auxotrophy above 34 degrees C, VAP homolog                                                                                                                                                                                                                                                                                                                                                                  |
| YAR042W                 | [SWH1] Protein similar to mammalian oxysterol-binding protein; contains ankyrin repeats; localizes to the Golgi and the nucleus-vacuole junction                                                                                                                                                                                                                                                                                                                                                                                                                                                         |
| YLR397C                 | [AFG2] ATPase of the CDC48/PAS1/SEC18 (AAA) family, forms a hexameric complex; may be involved in degradation of aberrant mRNAs similar to the CDC48 gene product                                                                                                                                                                                                                                                                                                                                                                                                                                        |
| 0807                    | OVERLAP:[rRNA splicing] <440.30.20> SIZE:24                                                                                                                                                                                                                                                                                                                                                                                                                                                                                                                                                              |
| YDR367W                 |                                                                                                                                                                                                                                                                                                                                                                                                                                                                                                                                                                                                          |

|                  |                                                                                                                                                                                                                                                                                                                                                                                                                                                                                                                        |
|------------------|------------------------------------------------------------------------------------------------------------------------------------------------------------------------------------------------------------------------------------------------------------------------------------------------------------------------------------------------------------------------------------------------------------------------------------------------------------------------------------------------------------------------|
| <b>YHR065C</b>   | [RRP3] Protein involved in rRNA processing; required for maturation of the 35S primary transcript of pre-rRNA and for cleavage leading to mature 18S rRNA; homologous to eIF-4a, which is a DEAD box RNA-dependent ATPase with helicase activity weak RNA-dependent ATPase activity which is not specific for rRNA In strains where Rrp3 is depleted, 35S precursor RNA is improperly processed. Cleavage normally occurs at sites A00, A1 and A2, but in the Rrp3 depletion strain cleavage occurs between A2 and B1. |
| 0808             | GO_TERM:[biological_process] P-Value:2.3e-01                                                                                                                                                                                                                                                                                                                                                                                                                                                                           |
| YAR014C          | [BUD14] Protein involved in bud-site selection, Bud14p-Glc7p complex functions as a cortical regulator of dynein; diploid mutants display a random budding pattern instead of the wild-type bipolar pattern                                                                                                                                                                                                                                                                                                            |
| YML131W          |                                                                                                                                                                                                                                                                                                                                                                                                                                                                                                                        |
| YOL154W          | [ZPS1] Putative GPI-anchored protein; transcription is induced under low-zinc conditions, as mediated by the Zap1p transcription factor, and at alkaline pH                                                                                                                                                                                                                                                                                                                                                            |
| 0809             |                                                                                                                                                                                                                                                                                                                                                                                                                                                                                                                        |
| YBR011C          | [IPP1] Cytoplasmic inorganic pyrophosphatase (PPase), catalyzes the rapid exchange of oxygens from Pi with water, highly expressed and essential for viability, active-site residues show identity to those from E. coli PPase inorganic pyrophosphatase                                                                                                                                                                                                                                                               |
| YLR425W          | [TUS1] Guanine nucleotide exchange factor (GEF) that functions to modulate Rhop1 activity as part of the cell integrity signaling pathway; multicopy suppressor of tor2 mutation and ypk1 ypk2 double mutation; potential Cdc28p substrate Null mutant is viable; shows temperature sensitive growth above 37 degrees C, but no detectable secretory or endocytosis defect.                                                                                                                                            |
| YPL066W          |                                                                                                                                                                                                                                                                                                                                                                                                                                                                                                                        |
| 0810             | GO_TERM:[cellular metabolism] P-Value:9.7e-01                                                                                                                                                                                                                                                                                                                                                                                                                                                                          |
| YER063W          | [THO1] Protein of unknown function; overproduction suppresses the transcriptional defect caused by an hpr1 mutation Null mutant is viable; wild-type levels of transcription and recombination; overexpression of THO1 suppresses the temperature-sensitive phenotype of hpr1-delta mutants and their incapacity to transcribe lacZ sequences.                                                                                                                                                                         |
| YPL172C          | [COX10] Heme A:farnesyltransferase, catalyzes the first step in the conversion of protoheme to the heme A prosthetic group required for cytochrome c oxidase activity; human ortholog is associated with mitochondrial disorders farnesyl transferase (putative) mutant lacks cytochrome oxidase activity and cytochromes a and a3 and is respiratory-defective                                                                                                                                                        |
| 0811             | GO_TERM:[nucleolus] P-Value:1.0e-01 OVERLAP:[cytoplasmic ribosomal small subunit] <500.40.20> SIZE:57                                                                                                                                                                                                                                                                                                                                                                                                                  |
| <b>YGL123W</b>   | [RPS2] Protein component of the small (40S) subunit, essential for control of translational accuracy; has similarity to E. coli S5 and rat S2 ribosomal proteins ribosomal protein S2 (S4) (rp12) (YS5) Omnipotent suppressor of nonsense mutations                                                                                                                                                                                                                                                                    |
| YFL046W          | [YFL046W] The authentic, non-tagged protein was localized to the mitochondria                                                                                                                                                                                                                                                                                                                                                                                                                                          |
| YMR131C          | [RRB1] Essential nuclear protein involved in early steps of ribosome biogenesis; physically interacts with the ribosomal protein Rpl3p                                                                                                                                                                                                                                                                                                                                                                                 |
| 0812             |                                                                                                                                                                                                                                                                                                                                                                                                                                                                                                                        |
| YML126C          | [ERG13] 3-hydroxy-3-methylglutaryl-CoA (HMG-CoA) synthase, catalyzes the formation of HMG-CoA from acetyl-CoA and acetoacetyl-CoA; involved in the second step in mevalonate biosynthesis 3-hydroxy-3-methylglutaryl coenzyme A synthase                                                                                                                                                                                                                                                                               |
| YNL119W          | [NCS2] Protein with a role in urmylation and in invasive and pseudohyphal growth; inhibits replication of Brome mosaic virus in S. cerevisiae, which is a model system for studying replication of positive-strand RNA viruses in their natural hosts                                                                                                                                                                                                                                                                  |
| 0813             | GO_TERM:[homocitrate synthase activity] P-Value:1.6e-06 OVERLAP:[cytoplasmic ribosomal large subunit] <500.40.10> SIZE:81                                                                                                                                                                                                                                                                                                                                                                                              |
| YDL131W          | [LYS21] Homocitrate synthase isozyme, catalyzes the condensation of acetyl-CoA and alpha-ketoglutarate to form homocitrate, which is the first step in the lysine biosynthesis pathway; highly similar to the other isozyme, Lys20p YDL182W (LYS20) homolog/homocitrate synthase                                                                                                                                                                                                                                       |
| <b>YJR094W-A</b> | [RPL43B] Protein component of the large (60S) ribosomal subunit, identical to Rpl43Ap and has similarity to rat L37a ribosomal protein ribosomal protein L43B                                                                                                                                                                                                                                                                                                                                                          |
| YDL182W          | [LYS20] Homocitrate synthase isozyme, catalyzes the condensation of acetyl-CoA and alpha-ketoglutarate to form homocitrate, which is the first step in the lysine biosynthesis pathway; highly similar to the other isozyme, Lys21p YDL131W (LYS21) homolog/homocitrate synthase Null mutant is viable, is able to grow on minimal media, and exhibits reduced but significant homocitrate synthase activity                                                                                                           |
| <b>YDR500C</b>   | [RPL37B] Protein component of the large (60S) ribosomal subunit, has similarity to Rpl37Ap and to rat L37 ribosomal protein ribosomal protein L37B (L43) (YL35)                                                                                                                                                                                                                                                                                                                                                        |
| 0814             | GO_TERM:[unannotated] P-Value:4.4e-02                                                                                                                                                                                                                                                                                                                                                                                                                                                                                  |
| YOR091W          | [TMA46] Protein of unknown function that associates with ribosomes; interacts with GTPase Rbg1p                                                                                                                                                                                                                                                                                                                                                                                                                        |
| YAL036C          | [RBG1] Member of the DRG family of GTP-binding proteins; interacts with translating ribosomes and with Tma46p                                                                                                                                                                                                                                                                                                                                                                                                          |

|                |                                                                                                                                                                                                                                                                                                                                                                            |
|----------------|----------------------------------------------------------------------------------------------------------------------------------------------------------------------------------------------------------------------------------------------------------------------------------------------------------------------------------------------------------------------------|
| YCR038C        | [BUD5] GTP/GDP exchange factor for Rsr1p (Bud1p) required for both axial and bipolar budding patterns; mutants exhibit random budding in all cell types GTP/GDP exchange factor for Rsr1 protein bud5 mutants select bud sites randomly                                                                                                                                    |
| 0815           | GO_TERM:[molecular_function] P-Value:1.7e-01                                                                                                                                                                                                                                                                                                                               |
| YBR187W        |                                                                                                                                                                                                                                                                                                                                                                            |
| YDR412W        | [YDR412W] Protein required for cell viability                                                                                                                                                                                                                                                                                                                              |
| 0816           | GO_TERM:[molecular_function] P-Value:2.9e-02                                                                                                                                                                                                                                                                                                                               |
| YGR271C-A      |                                                                                                                                                                                                                                                                                                                                                                            |
| YMR014W        | [BUD22] Protein involved in bud-site selection; diploid mutants display a random budding pattern instead of the wild-type bipolar pattern                                                                                                                                                                                                                                  |
| YGR272C        |                                                                                                                                                                                                                                                                                                                                                                            |
| YNL255C        | [GIS2] Protein with seven cysteine-rich CCHC zinc-finger motifs, similar to human CNBP, proposed to be involved in the RAS/cAMP signaling pathway                                                                                                                                                                                                                          |
| 0817           | GO_TERM:[molecular_function] P-Value:3.7e-01                                                                                                                                                                                                                                                                                                                               |
| YGR187C        | [HGH1] Protein of unknown function with similarity to human HMG1 and HMG2; localizes to the cytoplasm                                                                                                                                                                                                                                                                      |
| YBR155W        | [CNS1] TPR-containing co-chaperone; binds both Hsp82p (Hsp90) and Ssa1p (Hsp70) and stimulates the ATPase activity of SSA1, ts mutants reduce Hsp82p function while over expression suppresses the phenotypes of an HSP82 ts allele and a cpr7 deletion Null mutant is inviable; overexpression of CNS1 restores normal growth and Hsp90 activity in a cpr7 mutant strain. |
| YCL014W        | [BUD3] Protein involved in bud-site selection and required for axial budding pattern; localizes with septins to bud neck in mitosis and may constitute an axial landmark for next round of budding Null mutant is viable; bipolar budding pattern in all cell types                                                                                                        |
| 0818           | GO_TERM:[2-isopropylmalate synthase activity] P-Value:6.5e-06                                                                                                                                                                                                                                                                                                              |
| YKL183W        | [LOT5] Protein of unknown function; gene expression increases in cultures shifted to a lower temperature                                                                                                                                                                                                                                                                   |
| YNL104C        | [LEU4] Alpha-isopropylmalate synthase (2-isopropylmalate synthase); the main isozyme responsible for the first step in the leucine biosynthesis pathway alpha-isopropylmalate synthase (2-isopropylmalate synthase) Null mutant is viable, Leu+                                                                                                                            |
| YOR108W        | [LEU9] Alpha-isopropylmalate synthase II (2-isopropylmalate synthase), catalyzes the first step in the leucine biosynthesis pathway; the minor isozyme, responsible for the residual alpha-IPMS activity detected in a leu4 null mutant alpha-isopropylmalate synthase (2-isopropylmalate synthase)                                                                        |
| YKL214C        | [YRA2] Member of the REF (RNA and export factor binding proteins) family; when overexpressed, can substitute for the function of Yra1p in export of poly(A)+ mRNA from the nucleus                                                                                                                                                                                         |
| YOL144W        | [NOP8] Nucleolar protein required for 60S ribosomal subunit biogenesis                                                                                                                                                                                                                                                                                                     |
| YJR041C        | [URB2] Nucleolar protein required for normal metabolism of the rRNA primary transcript, proposed to be involved in ribosome biogenesis                                                                                                                                                                                                                                     |
| YLR221C        | [RSA3] Protein with a likely role in ribosomal maturation, required for accumulation of wild-type levels of large (60S) ribosomal subunits; binds to the helicase Dbp6p in pre-60S ribosomal particles in the nucleolus                                                                                                                                                    |
| YNR038W        | [DBP6] Essential protein involved in ribosome biogenesis; putative ATP-dependent RNA helicase of the DEAD-box protein family RNA helicase (putative) Null mutant is inviable; Dbp6p depletion leads to decreased production of the 27S and 7S precursors, resulting in a depletion of the mature 25S and 5.8S rRNAs                                                        |
| 0819           | GO_TERM:[catalytic activity] P-Value:7.3e-02 OVERLAP:[rRNA splicing] <440.30.20> SIZE:24                                                                                                                                                                                                                                                                                   |
| YDL141W        | [BPL1] Biotin:apoprotein ligase, covalently modifies proteins with the addition of biotin, required for acetyl-CoA carboxylase (Acc1p) holoenzyme formation biotin:apoprotein ligase                                                                                                                                                                                       |
| <b>YMR239C</b> | [RNT1] RNAase III; cleaves a stem-loop structure at the 3' end of U2 snRNA to ensure formation of the correct U2 3' end ribonuclease III                                                                                                                                                                                                                                   |
| 0820           | GO_TERM:[rRNA catabolism] P-Value:4.9e-14 OVERLAP:[Pre-replication complex (pre-RC)] <410.30> SIZE:16                                                                                                                                                                                                                                                                      |
| YIL018W        | [RPL2B] Protein component of the large (60S) ribosomal subunit, identical to Rpl2Ap and has similarity to E. coli L2 and rat L8 ribosomal proteins; expression is upregulated at low temperatures ribosomal protein L2B (L5B) (rp8) (YL6)                                                                                                                                  |
| YJR036C        | [HUL4] Protein with similarity to hect domain E3 ubiquitin-protein ligases, not essential for viability ubiquitin ligase (E3)                                                                                                                                                                                                                                              |
| YNR073C        |                                                                                                                                                                                                                                                                                                                                                                            |
| <b>YJL090C</b> | [DPB11] Essential BRCT repeat protein, required on the prereplicative complex at replication origins for loading DNA polymerases to initiate DNA synthesis, also required for S/M checkpoint control DNA polymerase II complex Null mutant is inviable; conditional allele demonstrates defective S-phase progression                                                      |
| YJL050W        | [MTR4] Dead-box family ATP dependent helicase required for mRNA export from the nucleus; co-factor of the exosome complex, required for 3' end formation of 5.8S rRNA RNA helicase                                                                                                                                                                                         |
| YDL175C        | [AIR2] RING finger protein that interacts with the arginine methyltransferase Hmt1p; may regulate methylation of Npl3p, which modulates Npl3p function in mRNA processing and export; has similarity to Air1p                                                                                                                                                              |

|                |                                                                                                                                                                                                                                                                                                                                                                                                                                     |
|----------------|-------------------------------------------------------------------------------------------------------------------------------------------------------------------------------------------------------------------------------------------------------------------------------------------------------------------------------------------------------------------------------------------------------------------------------------|
| YOL115W        | [PAP2] Catalytic subunit of TRAMP (Trf4/Pap2p-Mtr4p-Air1p/2p), a nuclear poly (A) polymerase complex involved in RNA quality control; catalyzes polyadenylation of unmodified tRNAs, and snoRNA and rRNA precursors; disputed role as a DNA polymerase DNA polymerase sigma poly(A) polymerase                                                                                                                                      |
| YIL079C        | [AIR1] RING finger protein that interacts with the arginine methyltransferase Hmt1p to regulate methylation of Npl3p, which modulates Npl3p function in mRNA processing and export; has similarity to Air2p                                                                                                                                                                                                                         |
| YNL299W        | [TRF5] Poly (A) polymerase involved in nuclear RNA quality control based on: homology with Trf4p, genetic interactions with TRF4 mutants, physical interaction with Mtr4p (TRAMP subunit), and by direct assay; disputed role as a sigma DNA polymerase DNA polymerase sigma                                                                                                                                                        |
| 0821           |                                                                                                                                                                                                                                                                                                                                                                                                                                     |
| YHR053C        | [CUP1-1] Metallothionein, binds copper and mediates resistance to high concentrations of copper and cadmium; locus is variably amplified in different strains, with two copies, CUP1-1 and CUP1-2, in the genomic sequence reference strain S288C copper binding metallothionein Copper resistance                                                                                                                                  |
| YKL023W        |                                                                                                                                                                                                                                                                                                                                                                                                                                     |
| 0822           | GO_TERM:[transcription termination from RNA polymerase II promoter] P-Value:7.4e-07                                                                                                                                                                                                                                                                                                                                                 |
| YML117W        | [NAB6] Putative RNA-binding protein, based on computational analysis of large-scale protein-protein interaction data                                                                                                                                                                                                                                                                                                                |
| YLR430W        | [SEN1] Nuclear protein, putative helicase required for processing of tRNAs, rRNAs, and small nuclear RNAs; potential Cdc28p substrate nuclear-localized tRNA splicing complex component                                                                                                                                                                                                                                             |
| YNL251C        | [NRD1] RNA-binding protein that interacts with the C-terminal domain of the RNA polymerase II large subunit (Rpo21p), required for transcription termination and 3' end maturation of nonpolyadenylated RNAs                                                                                                                                                                                                                        |
| YPL190C        | [NAB3] Single stranded DNA binding protein; acidic ribonucleoprotein; required for termination of non-poly(A) transcripts and efficient splicing; interacts with Nrd1p polyadenylated RNA binding protein polyadenylated single strand DNA-binding protein null is inviable; overexpression reduces the expression of the G1 cyclin CLN3                                                                                            |
| 0823           | GO_TERM:[exosome (RNase complex)] P-Value:1.3e-34 OVERLAP:[Exosome complex] <440.12.10> SIZE:7                                                                                                                                                                                                                                                                                                                                      |
| YGL213C        | [SKI8] Protein involved in exosome mediated 3' to 5' mRNA degradation and translation inhibition of non-poly(A) mRNAs as well as double-strand break formation during meiotic recombination; required for repressing propagation of dsRNA viruses antiviral protein mRNA is induced early in meiosis Null mutant is viable; rec103 is rescued by spo13 and is episatic to rad52 spo13, suggesting it is an early recombination gene |
| YLR398C        | [SKI2] Putative RNA helicase, involved in exosome mediated 3' to 5' mRNA degradation and translation inhibition of non-poly(A) mRNAs; forms complex with Ski3p and Ski8p; required for repressing propagation of dsRNA viruses antiviral protein helicase (putative) Null mutant is viable; SKI2 is essential in cells carrying M dsRNA                                                                                             |
| YPR189W        | [SKI3] Protein involved in exosome mediated 3' to 5' mRNA degradation and translation inhibition of non-poly(A) mRNAs; forms complex with Ski2p and Ski8p; required for repressing propagation of dsRNA viruses antiviral protein that blocks translation of un-polyadenylated mRNAs                                                                                                                                                |
| YDR083W        | [RRP8] Nucleolar protein involved in rRNA processing, pre-rRNA cleavage at site A2; also involved in telomere maintenance; mutation is synthetically lethal with a gar1 mutation nucleolar protein required for efficient processing of pre-rRNA at site A2; methyltransferase homolog                                                                                                                                              |
| YNR024W        |                                                                                                                                                                                                                                                                                                                                                                                                                                     |
| YHR081W        | [LRP1] Substrate-specific nuclear cofactor for exosome activity in the processing of stable RNAs; required for telomere length maintenance; homolog of mammalian nuclear matrix protein C1D involved in regulation of DNA repair and recombination                                                                                                                                                                                  |
| YOR076C        | [SKI7] Antiviral adaptor protein that mediates interactions via its N-terminus between the exosome and Ski complex (Ski2p, Ski3p, Ski8p) which operate in the 3'-to-5' mRNA-decay pathway; cytoplasmic protein required for degrading nonstop mRNAs GTPase (putative)                                                                                                                                                               |
| YOL142W        | [RRP40] Protein involved in rRNA processing; component of the exosome 3->5 exonuclease complex 3' -> 5' exoribonuclease The null mutant is inviable and defective in 3' processing of 5.8S rRNA                                                                                                                                                                                                                                     |
| YGR158C        | [MTR3] 3'5' exoribonuclease, exosome subunit; nucleolar protein involved in export of mRNA and ribosomal subunits; homologous to the E. coli exonuclease RNase PH null is inviable; mutant with mtr3-1 allele has defects in both mRNA transport and in rRNA synthesis/processing, with polyA+ mRNA accumulated in the nucleolus                                                                                                    |
| <b>YOL021C</b> | [DIS3] Nucleolar exosome component, involved in rRNA processing and RNA degradation, binds Gsp1p/Ran and enhances the GEF activity of Srm1p, implicated in mitotic control, homologous to the E. coli RNase R of the RNase II family 3'-5' exoribonuclease complex subunit                                                                                                                                                          |
| YNL232W        | [CSL4] Subunit of the exosome, which is an essential complex present in both nucleus and cytoplasm that mediates RNA processing and degradation Null mutant is inviable, csl4-1 exhibits double mutant inviability in combination with cbf1(cep1) deletion mutants                                                                                                                                                                  |
| <b>YCR035C</b> | [RRP43] Protein involved in rRNA processing; component of the exosome 3->5 exonuclease complex with Rrp41p, Rrp42p, Rrp4p and Dis3p; required for efficient maturation of 5.8S, 18S and 25S rRNA exosome 3->5 exoribonuclease complex component with Rrp4p, Rrp41p, Rrp42p and Dis3p (Rrp44p) Null mutant is inviable in some strain backgrounds; rrp43 mutants are defective in 3' processing of 5.8S RNA                          |
| YOR001W        | [RRP6] Exonuclease component of the nuclear exosome; contributes to the quality-control system that retains and degrades aberrant mRNAs in the nucleus Null mutant is viable, heat sensitive; other mutants show a 5.8S rRNA 3' end formation defect                                                                                                                                                                                |
| <b>YDR280W</b> | [RRP45] Protein involved in rRNA processing; component of the exosome 3->5 exonuclease complex 3'->5' exoribonuclease Null mutant is inviable; mutant is defective in 3' processing of 5.8S rRNA                                                                                                                                                                                                                                    |
| <b>YDL111C</b> | [RRP42] Protein involved in rRNA processing; component of the exosome 3->5 exonuclease complex with Rrp4p, Rrp41p, Rrp43p and Dis3p exosome 3->5 exoribonuclease complex component with Rrp4p, Rrp41p, Rrp43p and Dis3p (Rrp44p) Null mutant is inviable, rrp42 mutants are defective in 3' processing of 5.8S RNA                                                                                                                  |

|                |                                                                                                                                                                                                                                                                                                                                                                                                                                                                                                                                            |
|----------------|--------------------------------------------------------------------------------------------------------------------------------------------------------------------------------------------------------------------------------------------------------------------------------------------------------------------------------------------------------------------------------------------------------------------------------------------------------------------------------------------------------------------------------------------|
| <b>YGR195W</b> | [SK16] 3'-to-5' phosphorolytic exoribonuclease that is a subunit of the exosome; required for 3' processing of the 5.8S rRNA; involved in 3' to 5' mRNA degradation and translation inhibition of non-poly(A) mRNAs RNase PH homolog Null mutant is inviable; mutants show superkiller phenotype, improved translation of non-poly(A) mRNA, abnormal 60S ribosomal subunits and defective 3' processing of 5.8S rRNA; a Tn3 insertion into this gene causes hypersensitivity to the cell surface polymer perturbing agent calcofluor white |
| <b>YGR095C</b> | [RRP46] Protein involved in rRNA processing; component of the exosome 3->5 exonuclease complex 3'->5' exoribonuclease Null mutant is inviable; mutant is defective in 3' processing of 5.8S rRNA                                                                                                                                                                                                                                                                                                                                           |
| <b>YHR069C</b> | [RRP4] Protein involved in rRNA processing; component of the exosome 3->5 exonuclease complex with Rrp41p, Rrp42p, Rrp43p and Dis3p 3'-5' exoribonuclease 3'-5' exoribonuclease complex component with Rrp4p, Rrp41p, Rrp42p and Dis3p (Rrp44p) Null is inviable; Defective in 3' processing of 5.8S rRNA                                                                                                                                                                                                                                  |
| 0824           | GO_TERM:[NatA complex] P-Value:1.3e-05 OVERLAP:[Protein N-acetyltransferase] <370> SIZE:2                                                                                                                                                                                                                                                                                                                                                                                                                                                  |
| YEL026W        | [SNU13] RNA binding protein, part of U3 snoRNP involved in rRNA processing, part of U4/U6-U5 tri-sRNP involved in mRNA splicing, similar to human 15.5K protein U3 snoRNP protein U4/U6.U5 snRNP component                                                                                                                                                                                                                                                                                                                                 |
| YGL045W        | [RIM8] Protein of unknown function, involved in the proteolytic activation of Rim101p in response to alkaline pH; has similarity to A. nidulans PalF Mutant shows reduced expression of IME1, defect in Rim1p C-terminal proteolytic processing, reduced sporulation, slow growth at 17 degrees, and a smooth colony morphology; RIM1, RIM8, RIM9, and RIM13 act in a single pathway, functioning in parallel to MCK1 by epistasis analysis                                                                                                |
| <b>YHR013C</b> | [ARD1] Subunit of the N-terminal acetyltransferase NatA (Nat1p, Ard1p, Nat5p); N-terminally acetylates many proteins, which influences multiple processes such as the cell cycle, heat-shock resistance, mating, sporulation, and telomeric silencing N alpha-acetyltransferase major subunit complexes with Nat1p                                                                                                                                                                                                                         |
| YOR253W        | [NAT5] Subunit of the N-terminal acetyltransferase NatA (Nat1p, Ard1p, Nat5p); N-terminally acetylates many proteins, which influences multiple processes such as the cell cycle, heat-shock resistance, mating, sporulation, and telomeric silencing N-acetyltransferase                                                                                                                                                                                                                                                                  |
| 0825           | GO_TERM:[rRNA processing] P-Value:5.9e-02                                                                                                                                                                                                                                                                                                                                                                                                                                                                                                  |
| YCR016W        |                                                                                                                                                                                                                                                                                                                                                                                                                                                                                                                                            |
| YDL231C        | [BRE4] Zinc finger protein containing five transmembrane domains; null mutant exhibits strongly fragmented vacuoles and sensitivity to brefeldin A, a drug which is known to affect intracellular transport                                                                                                                                                                                                                                                                                                                                |
| YLR022C        | [YLR022C] Essential protein involved in RNA metabolism, one of two yeast homologs (with Yhr087wp) of the human protein SBDS responsible for autosomal recessive Shwachman-Bodian-Diamond Syndrome, also conserved in Archaea                                                                                                                                                                                                                                                                                                               |
| YNL163C        | [RIA1] Cytoplasmic GTPase involved in biogenesis of the 60S ribosome; has similarity to translation elongation factor 2 (Eft1p and Eft2p) GTPase Null: quasi essential; null mutant exhibits very slow growth. Other phenotypes: Depletion of Ria1p leads to modification of the polysome profile, with the appearance of halfmers and a reduced level of 60S subunits; defect in rRNA processing and 60S export                                                                                                                           |
| 0826           | GO_TERM:[NatB complex] P-Value:3.9e-07                                                                                                                                                                                                                                                                                                                                                                                                                                                                                                     |
| YOL076W        | [MDM20] Non-catalytic subunit of the NatB N-terminal acetyltransferase, which catalyzes acetylation of the amino-terminal methionine residues of all proteins beginning with Met-Asp or Met-Glu and of some proteins beginning with Met-Asn or Met-Met; involved in mitochondrial inheritance and actin assembly Null mutant is viable; some alleles demonstrate temperature sensitive growth at 37C                                                                                                                                       |
| YPR131C        | [NAT3] Catalytic subunit of the NatB N-terminal acetyltransferase, which catalyzes acetylation of the amino-terminal methionine residues of all proteins beginning with Met-Asp or Met-Glu and of some proteins beginning with Met-Asn or Met-Met N-terminal acetyltransferase Lack of N-terminal acetylation of proteins with Met-Glu-, Met-Asp- and certain other termini.                                                                                                                                                               |
| 0827           | OVERLAP:[eIF4F] <500.10.80> SIZE:3                                                                                                                                                                                                                                                                                                                                                                                                                                                                                                         |
| YOL045W        | [PSK2] One of two (see also PSK1) PAS domain containing S/T protein kinases; regulates sugar flux and translation in response to an unknown metabolite by phosphorylating Ugp1p and Gsy2p (sugar flux) and Caf20p, Tif11p and Sro9p (translation) PAS kinase                                                                                                                                                                                                                                                                               |
| <b>YOR276W</b> | [CAF20] Phosphoprotein of the mRNA cap-binding complex involved in translational control, repressor of cap-dependent translation initiation, competes with eIF4G for binding to eIF4E 20 kDa protein functional and limited sequence similarity to EAP1 functionally analogous to mammalian 4E-BPs                                                                                                                                                                                                                                         |
| 0828           | GO_TERM:[mitochondrion] P-Value:2.4e-01 OVERLAP:[mitochondrial ribosomal large subunit] <500.60.10> SIZE:44                                                                                                                                                                                                                                                                                                                                                                                                                                |
| <b>YGL068W</b> | [MNP1] Protein associated with the mitochondrial nucleoid; putative mitochondrial ribosomal protein with similarity to E. coli L7/L12 ribosomal protein; required for normal respiratory growth                                                                                                                                                                                                                                                                                                                                            |
| YLR069C        | [MEF1] Mitochondrial elongation factor involved in translational elongation mitochondrial elongation factor G-like protein Null mutant is viable, respiratory defective, displays pleiotropic deficiency in cytochromes a, a3 and b; limited ability to incorporate labeled methionine; loss of mitochondrial DNA                                                                                                                                                                                                                          |
| 0829           | OVERLAP:[cytoplasmic ribosomal large subunit] <500.40.10> SIZE:81                                                                                                                                                                                                                                                                                                                                                                                                                                                                          |
| YIL085C        | [KTR7] Putative mannosyltransferase involved in protein glycosylation; member of the KRE2/MNT1 mannosyltransferase family                                                                                                                                                                                                                                                                                                                                                                                                                  |

|         |                                                                                                                                                                                                                                                                                                                                                                                                                                                                                                                                                                                                                                                                        |
|---------|------------------------------------------------------------------------------------------------------------------------------------------------------------------------------------------------------------------------------------------------------------------------------------------------------------------------------------------------------------------------------------------------------------------------------------------------------------------------------------------------------------------------------------------------------------------------------------------------------------------------------------------------------------------------|
| YLR325C | [RPL38] Protein component of the large (60S) ribosomal subunit, has similarity to rat L38 ribosomal protein ribosomal protein L38                                                                                                                                                                                                                                                                                                                                                                                                                                                                                                                                      |
| 0830    |                                                                                                                                                                                                                                                                                                                                                                                                                                                                                                                                                                                                                                                                        |
| YGR204W | [ADE3] Cytoplasmic trifunctional enzyme C1-tetrahydrofolate synthase, involved in single carbon metabolism and required for biosynthesis of purines, thymidylate, methionine, and histidine C1-tetrahydrofolate synthase Null mutant is viable, adenine auxotroph, histidine auxotroph                                                                                                                                                                                                                                                                                                                                                                                 |
| YIL137C | [TMA108] Protein that associates with ribosomes; putative metalloprotease                                                                                                                                                                                                                                                                                                                                                                                                                                                                                                                                                                                              |
| 0831    | GO_TERM:[2-oxoglutarate metabolism] P-Value:3.2e-06 OVERLAP:[mitochondrial ribosomal small subunit] <500.60.20> SIZE:31                                                                                                                                                                                                                                                                                                                                                                                                                                                                                                                                                |
| YFR049W | [YMR31] Mitochondrial ribosomal protein of the small subunit, has similarity to human mitochondrial ribosomal protein MRP-S36 mitochondrial ribosomal protein                                                                                                                                                                                                                                                                                                                                                                                                                                                                                                          |
| YDR148C | [KGD2] Dihydropyridyl transsuccinylase, a component of the mitochondrial alpha-ketoglutarate dehydrogenase complex, which catalyzes a step in the tricarboxylic acid (TCA) cycle, the oxidative decarboxylation of alpha-ketoglutarate to succinyl-CoA alpha-ketoglutarate dehydrogenase complex dihydropyridyl transsuccinylase component Null mutant is viable but is respiratory deficient (pet-), and its mitochondria are unable to catalyze the reduction of NAD+ by alpha-ketoglutarate                                                                                                                                                                         |
| YIL125W | [KGD1] Component of the mitochondrial alpha-ketoglutarate dehydrogenase complex, which catalyzes a key step in the tricarboxylic acid (TCA) cycle, the oxidative decarboxylation of alpha-ketoglutarate to form succinyl-CoA alpha-ketoglutarate dehydrogenase Null mutant is viable but is deficient in alpha-ketoglutarate dehydrogenase, is therefore respiratory deficient, cannot grow on glycerol, and produces increased amount of organic acids during growth on glucose                                                                                                                                                                                       |
| 0832    | GO_TERM:[transcription export complex] P-Value:1.1e-15 OVERLAP:[Ctk1p complex] <133.50> SIZE:3                                                                                                                                                                                                                                                                                                                                                                                                                                                                                                                                                                         |
| YKL139W | [CTK1] Catalytic (alpha) subunit of C-terminal domain kinase I (CTDK-I), which phosphorylates the C-terminal repeated domain of the RNA polymerase II large subunit (Rpo21p) to affect both transcription and pre-mRNA 3' end processing kinase subunit of RNA polymerase II carboxy-terminal domain kinase I Null mutations in each of the CTK1, CTK2, and CTK3 genes cause slow growth, cold-sensitivity, flocculence, and enlarged cell size.                                                                                                                                                                                                                       |
| YJL006C | [CTK2] Beta subunit of C-terminal domain kinase I (CTDK-I), which phosphorylates the C-terminal repeated domain of the RNA polymerase II large subunit (Rpo21p) to affect both transcription and pre-mRNA 3' end processing; has similarity to cyclins RNA polymerase II C-terminal domain kinase beta subunit, similar to cyclin Null mutations in each of the CTK1, CTK2, and CTK3 genes cause slow growth, cold-sensitivity, flocculence, and enlarged cell size.                                                                                                                                                                                                   |
| YML112W | [CTK3] Gamma subunit of C-terminal domain kinase I (CTDK-I), which phosphorylates the C-terminal repeated domain of the RNA polymerase II large subunit (Rpo21p) to affect both transcription and pre-mRNA 3' end processing RNA polymerase II C-terminal domain kinase gamma subunit, similar to cyclin-dependent kinase Null mutations in each of the CTK1, CTK2, and CTK3 genes cause slow growth, cold-sensitivity, flocculence, and enlarged cell size.                                                                                                                                                                                                           |
| YOR191W | [RIS1] Member of the SWI/SNF family of DNA-dependent ATPases, plays a role in antagonizing silencing during mating-type switching, contains an N-terminal domain that interacts with Sir4p and a C-terminal SNF2 domain SWI2/SNF2 DNA-dependent ATPase family member (putative) Null mutant is viable but shows slower mating type switching; interferes with silencing when overexpressed                                                                                                                                                                                                                                                                             |
| YJR032W | [CPR7] Peptidyl-prolyl cis-trans isomerase (cyclophilin), catalyzes the cis-trans isomerization of peptide bonds N-terminal to proline residues; binds to Hsp82p and contributes to chaperone activity cyclophilin 40 peptidyl-prolyl cis-trans isomerase (PPIase)                                                                                                                                                                                                                                                                                                                                                                                                     |
| YNL004W | [HRB1] Poly(A+) RNA-binding protein, involved in the export of mRNAs from the nucleus to the cytoplasm; similar to Gbp2p and Npl3p hypothetical RNA-binding protein                                                                                                                                                                                                                                                                                                                                                                                                                                                                                                    |
| YCL011C | [GBP2] Poly(A+) RNA-binding protein, involved in the export of mRNAs from the nucleus to the cytoplasm; similar to Hrb1p and Npl3p; also binds single-stranded telomeric repeat sequence in vitro contains RNA recognition motifs Mutation alters the distribution of Rap1p, a telomere-associated protein, but has no effect on telomere length or telomere position                                                                                                                                                                                                                                                                                                  |
| YML062C | [MFT1] Subunit of the THO complex, which is a nuclear complex comprised of Hpr1p, Mft1p, Rlr1p, and Thp2p, that is involved in transcription elongation and mitotic recombination; involved in telomere maintenance mitochondrial targeting protein                                                                                                                                                                                                                                                                                                                                                                                                                    |
| YDR138W | [HPR1] Subunit of THO/TREX complexes that couple transcription elongation with mitotic recombination and with mRNA metabolism and export, subunit of an RNA Pol II complex; regulates lifespan; involved in telomere maintenance; similar to Top1p Increased intrachromosomal recombination                                                                                                                                                                                                                                                                                                                                                                            |
| YDL084W | [SUB2] Component of the TREX complex required for nuclear mRNA export; DEAD-box RNA helicase involved in early and late steps of spliceosome assembly; homolog of the human splicing factor hUAP56 ATP-dependent RNA helicase Null mutant is inviable; sub2 allele suppresses cold-sensitive snRNP phenotype of brr1-1                                                                                                                                                                                                                                                                                                                                                 |
| YNL139C | [RLR1] Subunit of the THO complex, which is required for efficient transcription elongation and involved in transcriptional elongation-associated recombination; required for LacZ RNA expression from certain plasmids Null mutant is viable but shows poor growth and a temperature-sensitive phenotype. Increased frequencies of recombination between direct repeats (>1000-fold above wild-type levels) that is linked to transcriptional elongation defects. General defects in RNA polII transcription. Incapacity to transcribe lacZ. Overexpression of RLR1 suppresses the ts phenotype and the incapacity to transcribe lacZ sequences of hpr1-delta mutants |
| YHR167W | [THP2] Subunit of the THO complex, which connects transcription elongation and mitotic recombination, and of the TREX complex, which is recruited to activated genes and couples transcription to mRNA export; involved in telomere maintenance null mutant is viable, hyper-recombination between direct repeats dependent on transcription elongation, transcription elongation impairment, inability to properly transcribe lacZ sequences                                                                                                                                                                                                                          |
| YNL253W | [TEX1] Protein involved in mRNA export, component of the transcription export (TREX) complex                                                                                                                                                                                                                                                                                                                                                                                                                                                                                                                                                                           |

|                         |                                                                                                                                                                                                                                                                                                                                                                                                      |
|-------------------------|------------------------------------------------------------------------------------------------------------------------------------------------------------------------------------------------------------------------------------------------------------------------------------------------------------------------------------------------------------------------------------------------------|
| 0833                    | GO_TERM:[nucleolus] P-Value:9.4e-02                                                                                                                                                                                                                                                                                                                                                                  |
| YNL186W                 | [UBP10] Ubiquitin-specific protease that deubiquitinates ubiquitin-protein moieties; may regulate silencing by acting on Sir4p; involved in posttranscriptionally regulating Gap1p and possibly other transporters; primarily located in the nucleus Null mutant is viable, exhibits decreased telomeric silencing; UBP10(DOT4) overexpression reduces silencing at the HM, rDNA, and telomeric loci |
| YGR251W                 |                                                                                                                                                                                                                                                                                                                                                                                                      |
| YKL078W                 | [DHR2] Predominantly nucleolar DEAH-box RNA helicase, required for 18S rRNA synthesis Required for 18S ribosomal RNA synthesis Null: essential                                                                                                                                                                                                                                                       |
| 0834                    |                                                                                                                                                                                                                                                                                                                                                                                                      |
| YBR034C                 | [HMT1] Nuclear SAM-dependent mono- and asymmetric arginine dimethylating methyltransferase that modifies hnRNPs, including Npl3p and Hrp1p, thus facilitating nuclear export of these proteins; required for viability of npl3 mutants arginine methyltransferase mono- and asymmetrically dimethylating enzyme Null mutant is viable, hmt1 npl3-1 mutants are inviable                              |
| YDR249C                 |                                                                                                                                                                                                                                                                                                                                                                                                      |
| 0835                    | GO_TERM:[nucleus] P-Value:2.1e-01                                                                                                                                                                                                                                                                                                                                                                    |
| YBR158W                 | [AMN1] Protein required for daughter cell separation, multiple mitotic checkpoints, and chromosome stability; contains 12 degenerate leucine-rich repeat motifs; expression is induced by the Mitotic Exit Network (MEN)                                                                                                                                                                             |
| YDR111C                 | [YDR111C] Putative alanine transaminase (glutamic pyruvic transaminase)                                                                                                                                                                                                                                                                                                                              |
| YER147C                 | [SCC4] Subunit of cohesin loading factor (Scc2p-Scc4p), a complex required for the loading of cohesin complexes onto chromosomes; involved in establishing sister chromatid cohesion during double-strand break repair via phosphorylated histone H2AX                                                                                                                                               |
| 0836                    | GO_TERM:[polysome] P-Value:2.8e-05                                                                                                                                                                                                                                                                                                                                                                   |
| YJL080C                 | [SCP160] Essential RNA-binding G protein effector of mating response pathway, predominantly associated with nuclear envelope and ER, interacts in mRNA-dependent manner with translating ribosomes via multiple KH domains, similar to vertebrate vigitins                                                                                                                                           |
| YOR198C                 | [BFR1] Component of mRNP complexes associated with polyribosomes; implicated in secretion and nuclear segregation; multicopy suppressor of BFA (Brefeldin A) sensitivity                                                                                                                                                                                                                             |
| 0837                    | GO_TERM:[mRNA binding] P-Value:6.3e-07 OVERLAP:[rRNA splicing] <440.30.20> SIZE:24                                                                                                                                                                                                                                                                                                                   |
| YNL016W                 | [PUB1] Poly(A)+ RNA-binding protein, abundant mRNP-component protein hypothesized to bind a pool of non-translatable mRNAs; not reported to associate with polyribosomes poly(A) binding protein                                                                                                                                                                                                     |
| <a href="#">YDR432W</a> | [NPL3] RNA-binding protein that carries poly(A)+ mRNA from the nucleus into the cytoplasm; phosphorylation by Sky1p in the cytoplasm may promote release of mRNAs contains RNA recognition motif nuclear shuttling protein Null mutant is inviable, npl3 mutants are temperature-sensitive for growth, but do not exhibit a defect in localization of nuclear proteins                               |
| YGL122C                 | [NAB2] Nuclear polyadenylated RNA-binding protein; autoregulates mRNA levels; related to human hnRNPs; has nuclear localization signal sequence that binds to Kap104p; required for poly(A) tail length control and nuclear mRNA export polyadenylated RNA binding protein                                                                                                                           |
| 0838                    | GO_TERM:[catalytic activity] P-Value:7.3e-02 OVERLAP:[other respiration chain complexes] <420.60> SIZE:14                                                                                                                                                                                                                                                                                            |
| YOR243C                 | [PUS7] Pseudouridine synthase, catalyzes pseudouridylation at position 35 in U2 snRNA, position 13 in cytoplasmic tRNAs, and position 35 in pre-tRNA(Tyr); Asp(256) mutation abolishes activity; conserved in archaea, some bacteria, and vertebrates pseudouridine synthase                                                                                                                         |
| <a href="#">YOR356W</a> |                                                                                                                                                                                                                                                                                                                                                                                                      |
| 0839                    | GO_TERM:[eukaryotic translation initiation factor 3 complex] P-Value:3.1e-12 OVERLAP:[eIF3] <500.10.40> SIZE:7                                                                                                                                                                                                                                                                                       |
| <a href="#">YBR079C</a> | [RPG1] Subunit of the core complex of translation initiation factor 3(eIF3), essential for translation; part of a subcomplex (Prt1p-Rpg1p-Nip1p) that stimulates binding of mRNA and tRNA(i)Met to ribosomes translation initiation factor eIF3 subunit Null mutant is inviable; temperature sensitive mutant arrests in G1 phase                                                                    |
| <a href="#">YOR361C</a> | [PRT1] Subunit of the core complex of translation initiation factor 3(eIF3), essential for translation; part of a subcomplex (Prt1p-Rpg1p-Nip1p) that stimulates binding of mRNA and tRNA(i)Met to ribosomes translation initiation factor eIF3 subunit                                                                                                                                              |
| <a href="#">YDR429C</a> | [TIF35] Subunit of the core complex of translation initiation factor 3(eIF3), which is essential for translation translation initiation factor eIF3 subunit                                                                                                                                                                                                                                          |
| <a href="#">YMR309C</a> | [NIP1] Subunit of the eukaryotic translation initiation factor 3 (eIF3), involved in the assembly of preinitiation complex and start codon selection translation initiation factor eIF3 subunit Null mutant is inviable; nip1-1 is a temperature-sensitive mutant defective in nuclear transport                                                                                                     |
| 0840                    | GO_TERM:[ribosomal small subunit biogenesis] P-Value:2.5e-05                                                                                                                                                                                                                                                                                                                                         |

|                  |                                                                                                                                                                                                                                                                                                                                                                                                                                                                                                                                                 |
|------------------|-------------------------------------------------------------------------------------------------------------------------------------------------------------------------------------------------------------------------------------------------------------------------------------------------------------------------------------------------------------------------------------------------------------------------------------------------------------------------------------------------------------------------------------------------|
| YKL143W          | [LTV1] Protein required for growth at low temperature                                                                                                                                                                                                                                                                                                                                                                                                                                                                                           |
| YPL239W          | [YAR1] Cytoplasmic ankyrin-repeat containing protein of unknown function, proposed to link the processes of 40S ribosomal subunit biogenesis and adaptation to osmotic and oxidative stress; expression repressed by heat shock 200-amino-acid protein with two ANK repeat motifs and an acidic C terminus rich in PEST-like sequences Null mutant is viable, grow slowly at low temperature. YAR1 overexpression has no phenotype                                                                                                              |
| 0841             | GO_TERM:[nucleic acid binding] P-Value:1.7e-02                                                                                                                                                                                                                                                                                                                                                                                                                                                                                                  |
| YER161C          | [SPT2] Protein involved in negative regulation of transcription, exhibits regulated interactions with both histones and SWI-SNF components, has similarity to mammalian HMG1 proteins non-specific DNA binding protein Suppression of Ty transcription; loss of function allele is extragenic suppressor of hsp70 subfamily A. Mutations lead to accumulation of a previously uncharacterized form of hsp70.                                                                                                                                    |
| YIR001C          | [SGN1] Cytoplasmic RNA-binding protein, contains an RNA recognition motif (RRM); may have a role in mRNA translation, as suggested by genetic interactions with genes encoding proteins involved in translational initiation                                                                                                                                                                                                                                                                                                                    |
| 0842             | GO_TERM:[cytoplasm organization and biogenesis] P-Value:4.9e-71 OVERLAP:[cytoplasmic ribosomal large subunit] <500.40.10> SIZE:81                                                                                                                                                                                                                                                                                                                                                                                                               |
| YLR233C          | [EST1] TLC1 RNA-associated factor involved in telomere length regulation as the recruitment subunit of the telomerase holoenzyme, has a possible role in activating Est2p-TLC1-RNA bound to the telomere Telomere elongation protein                                                                                                                                                                                                                                                                                                            |
| YDL171C          | [GLT1] NAD(+)-dependent glutamate synthase (GOGAT), synthesizes glutamate from glutamine and alpha-ketoglutarate; with Gln1p, forms the secondary pathway for glutamate biosynthesis from ammonia; expression regulated by nitrogen source glutamate synthase (NADH)                                                                                                                                                                                                                                                                            |
| YDR386W          | [MUS81] Helix-hairpin-helix protein, involved in DNA repair and replication fork stability; functions as an endonuclease in complex with Mms4p; interacts with Rad54p Null mutant is viable but is MMS and UV sensitive and meiosis defective, null is synthetically lethal with sgs1 null                                                                                                                                                                                                                                                      |
| YGL246C          | [RAI1] Nuclear protein that binds to and stabilizes the exoribonuclease Rat1p, required for pre-rRNA processing                                                                                                                                                                                                                                                                                                                                                                                                                                 |
| YBR267W          | [REI1] Cytoplasmic pre-60S factor; required for the correct recycling of shuttling factors Alb1, Arx1 and Tif6 at the end of the ribosomal large subunit biogenesis; involved in bud growth in the mitotic signaling network                                                                                                                                                                                                                                                                                                                    |
| <b>YLR075W</b>   | [RPL10] Protein component of the large (60S) ribosomal subunit, responsible for joining the 40S and 60S subunits; regulates translation initiation; has similarity to rat L10 ribosomal protein and to members of the QM gene family ribosomal protein L10 Null mutant is inviable; temperature-sensitive mutant, at restrictive temperature (on rich medium), arrests after 1-3 cell divisions as large budded cells with aberrant septum and cytoskeleton                                                                                     |
| YOR080W          | [DIA2] Origin-binding F-box protein that forms an SCF ubiquitin ligase complex with Skp1p and Cdc53p; plays a role in DNA replication, involved in invasive and pseudohyphal growth Enhanced invasive growth in haploids; haploid budding pattern becomes polar.                                                                                                                                                                                                                                                                                |
| YLR196W          | [PWP1] Protein with WD-40 repeats involved in rRNA processing; associates with trans-acting ribosome biogenesis factors; similar to beta-transducin superfamily Null mutants are viable but show severely retarded growth                                                                                                                                                                                                                                                                                                                       |
| YER036C          | [ARB1] ATPase of the ATP-binding cassette (ABC) family involved in 40S and 60S ribosome biogenesis, has similarity to Gcn20p; shuttles from nucleus to cytoplasm, physically interacts with Tif6p, Lsg1p Shuttling protein, ATP binding cassette protein                                                                                                                                                                                                                                                                                        |
| <b>YGR085C</b>   | [RPL11B] Protein component of the large (60S) ribosomal subunit, nearly identical to Rpl11Ap; involved in ribosomal assembly; depletion causes degradation of proteins and RNA of the 60S subunit; has similarity to E. coli L5 and rat L11 ribosomal protein L11B (L16B) (rp39B) (YL22) Null mutant is viable, rpl11b rpl11a mutants are inviable. rpl11 mutants are deficient in 60S ribosomal subunits relative to 40S subunits. 43S preinitiation complexes accumulate in half-mer polyribosomes in the absence of sufficient 60S subunits. |
| <b>YDL082W</b>   | [RPL13A] Protein component of the large (60S) ribosomal subunit, nearly identical to Rpl13Bp; not essential for viability; has similarity to rat L13 ribosomal protein ribosomal protein L13A                                                                                                                                                                                                                                                                                                                                                   |
| <b>YPL143W</b>   | [RPL33A] N-terminally acetylated ribosomal protein L37 of the large (60S) ribosomal subunit, nearly identical to Rpl33Bp and has similarity to rat L35a; rpl33a null mutant exhibits slow growth while rpl33a rpl33b double null mutant is inviable ribosomal protein L33A (L37A) (YL37) (rp47) Null mutant is viable, severely impaired in growth. rpl33a rpl33b double deletion mutants are inviable                                                                                                                                          |
| <b>YEL054C</b>   | [RPL12A] Protein component of the large (60S) ribosomal subunit, nearly identical to Rpl12Bp; rpl12a rpl12b double mutant exhibits slow growth and slow translation; has similarity to E. coli L11 and rat L12 ribosomal proteins ribosomal protein L12A (L15A) (YL23)                                                                                                                                                                                                                                                                          |
| YPL009C          |                                                                                                                                                                                                                                                                                                                                                                                                                                                                                                                                                 |
| YLR427W          | [MAG2] DNA-3-methyladenine glycosidase II that catalyzes of the hydrolysis of alkylated DNA                                                                                                                                                                                                                                                                                                                                                                                                                                                     |
| <b>YMRI42C</b>   | [RPL13B] Protein component of the large (60S) ribosomal subunit, nearly identical to Rpl13Ap; not essential for viability; has similarity to rat L13 ribosomal protein ribosomal protein L13B                                                                                                                                                                                                                                                                                                                                                   |
| <b>YLR340W</b>   | [RPP0] Conserved ribosomal protein P0 similar to rat P0, human P0, and E. coli L10e; shown to be phosphorylated on serine 302 ribosomal protein P0 (A0) (L10E)                                                                                                                                                                                                                                                                                                                                                                                  |
| YLR455W          |                                                                                                                                                                                                                                                                                                                                                                                                                                                                                                                                                 |
| YDR381W          | [YRA1] Nuclear protein that binds to RNA and to Mex67p, required for export of poly(A)+ mRNA from the nucleus; member of the REF (RNA and export factor binding proteins) family; another family member, Yra2p, can substitute for Yra1p function RNA-binding RNA annealing protein Null mutant is inviable; overexpression causes growth arrest                                                                                                                                                                                                |
| YBR084W          | [MIS1] Mitochondrial C1-tetrahydrofolate synthase, involved in interconversion between different oxidation states of tetrahydrofolate (THF); provides activities of formyl-THF synthetase, methenyl-THF cyclohydrolase, and methylene-THF dehydrogenase C1-tetrahydrofolate synthase Null mutant is viable, exhibits no apparent defects in cell growth                                                                                                                                                                                         |
| YAL025C          | [MAK16] Essential nuclear protein, constituent of 66S pre-ribosomal particles; required for normal concentration of free 60S ribosomal subunits; required for maintenance of M1 satellite double-stranded RNA of the L-A virus nuclear protein (putative) Null mutant is inviable, conditional mutants arrest at G(sub)1, are deficient in maintenance of killer M1 double-stranded RNA                                                                                                                                                         |
| <b>YPL249C-A</b> | [RPL36B] Protein component of the large (60S) ribosomal subunit, nearly identical to Rpl36Ap and has similarity to rat L36 ribosomal protein; binds to 5.8 S rRNA ribosomal protein L36B (L39) (YL39)                                                                                                                                                                                                                                                                                                                                           |

|                |                                                                                                                                                                                                                                                                                                                                                                                                                                                                     |
|----------------|---------------------------------------------------------------------------------------------------------------------------------------------------------------------------------------------------------------------------------------------------------------------------------------------------------------------------------------------------------------------------------------------------------------------------------------------------------------------|
| <b>YPR102C</b> | [RPL11A] Protein component of the large (60S) ribosomal subunit, nearly identical to Rpl11Bp; involved in ribosomal assembly; depletion causes degradation of proteins and RNA of the 60S subunit; has similarity to E. coli L5 and rat L11 ribosomal protein L11A (L16A) (rp39A) (YL22)                                                                                                                                                                            |
| <b>YDL075W</b> | [RPL31A] Protein component of the large (60S) ribosomal subunit, nearly identical to Rpl31Bp and has similarity to rat L31 ribosomal protein; associates with the karyopherin Sxm1p ribosomal protein L31A (L34A) (YL28)                                                                                                                                                                                                                                            |
| YPL259C        | [APM1] Mu1-like medium subunit of the clathrin-associated protein complex (AP-1); binds clathrin; involved in clathrin-dependent Golgi protein sorting clathrin associated protein complex medium subunit Null mutant is viable, enhances the slow growth and late Golgi sorting defects of a chc1-ts mutant                                                                                                                                                        |
| <b>YLR029C</b> | [RPL15A] Protein component of the large (60S) ribosomal subunit, nearly identical to Rpl15Bp and has similarity to rat L15 ribosomal protein; binds to 5.8 S rRNA ribosomal protein L15A (YL10) (rp15R) (L13A)                                                                                                                                                                                                                                                      |
| YHR170W        | [NMD3] Protein involved in nuclear export of the large ribosomal subunit; acts as a Crm1p-dependent adapter protein for export of nascent ribosomal subunits through the nuclear pore complex factor required for a late assembly step of the 60S subunit Null mutant is inviable, at nonpermissive temperature, nmd3 ts mutants exhibit decreased levels of 60S subunits resulting in formation of half-mer polysomes; nmd3 xnl1(kem1) double mutants are inviable |
| <b>YGL103W</b> | [RPL28] Ribosomal protein L29 of the large (60S) ribosomal subunit, has similarity to E. coli L15 and rat L27a ribosomal proteins; may have peptidyl transferase activity; can mutate to cycloheximide resistance ribosomal protein L28 (L29) (rp44) (YL24)                                                                                                                                                                                                         |
| YJL122W        | [ALB1] Shuttling pre-60S factor; involved in the biogenesis of ribosomal large subunit; interacts directly with Arx1p; responsible for Tif6p recycling defects in absence of Rei1p.                                                                                                                                                                                                                                                                                 |
| <b>YKL180W</b> | [RPL17A] Protein component of the large (60S) ribosomal subunit, nearly identical to Rpl17Bp and has similarity to E. coli L22 and rat L17 ribosomal proteins; copurifies with the components of the outer kinetochore DASH complex ribosomal protein L17A (L20A) (YL17)                                                                                                                                                                                            |
| YKL021C        | [MAK11] Protein essential for cell growth and replication of M dsRNA virus; contains four beta-transducin repeats Null mutant is inviable, mak11-1 mutants result in specific loss of M1 double stranded RNA                                                                                                                                                                                                                                                        |
| YLR276C        | [DBP9] ATP-dependent RNA helicase of the DEAD-box family involved in biogenesis of the 60S ribosomal subunit                                                                                                                                                                                                                                                                                                                                                        |
| YDL168W        | [SFA1] Bifunctional enzyme containing both alcohol dehydrogenase and glutathione-dependent formaldehyde dehydrogenase activities, functions in formaldehyde detoxification and formation of long chain and complex alcohols, regulated by Hog1p-Sko1p glutathione-dependent formaldehyde dehydrogenase                                                                                                                                                              |
| YAL035W        | [FUN12] GTPase, required for general translation initiation by promoting Met-tRNA <sup>i</sup> Met binding to ribosomes and ribosomal subunit joining; homolog of bacterial IF2 97 kDa protein                                                                                                                                                                                                                                                                      |
| <b>YBL087C</b> | [RPL23A] Protein component of the large (60S) ribosomal subunit, identical to Rpl23Bp and has similarity to E. coli L14 and rat L23 ribosomal proteins ribosomal protein L23A (L17aA) (YL32)                                                                                                                                                                                                                                                                        |
| <b>YIL133C</b> | [RPL16A] N-terminally acetylated protein component of the large (60S) ribosomal subunit, binds to 5.8 S rRNA; has similarity to Rpl16Bp, E. coli L13 and rat L13a ribosomal proteins; transcriptionally regulated by Rap1p ribosomal protein L16A (L21A) (rp22) (YL15)                                                                                                                                                                                              |
| YNL230C        | [ELA1] Elongin A, F-box protein that forms a heterodimer with Elc1p and participates in transcription elongation elongin A transcription elongation factor                                                                                                                                                                                                                                                                                                          |
| YKR024C        | [DBP7] Putative ATP-dependent RNA helicase of the DEAD-box family involved in ribosomal biogenesis RNA helicase (putative)                                                                                                                                                                                                                                                                                                                                          |
| YOR005C        | [DNL4] DNA ligase required for nonhomologous end-joining (NHEJ), forms stable heterodimer with required cofactor Lif1p, catalyzes DNA ligation as part of a complex with Lif1p and Nej1p; involved in meiosis, not essential for vegetative growth ATP dependent DNA ligase Null mutant is viable, deficient in non-homologous double-strand end joining                                                                                                            |
| YIL035C        | [CKA1] Alpha catalytic subunit of casein kinase 2, a Ser/Thr protein kinase with roles in cell growth and proliferation; the holoenzyme also contains CKA2, CKB1 and CKB2, the many substrates include transcription factors and all RNA polymerases protein kinase CK2 alpha subunit Null mutant is viable; however, strains lacking both cka1 and cka2 (the alpha and alpha' subunits of protein kinase CK2, respectively) are inviable.                          |
| YPL146C        | [NOP53] Nucleolar protein; involved in biogenesis of the 60S subunit of the ribosome; interacts with rRNA processing factors Cbf5p and Nop2p; null mutant is viable but growth is severely impaired                                                                                                                                                                                                                                                                 |
| <b>YPL220W</b> | [RPL1A] N-terminally acetylated protein component of the large (60S) ribosomal subunit, nearly identical to Rpl1Bp and has similarity to E. coli L1 and rat L10a ribosomal proteins; rpl1a rpl1b double null mutation is lethal ribosomal protein L1A, forms part of the 60S ribosomal subunit Null mutant is viable; shows double mutant lethality with rpl1b (ssm2b) null mutants                                                                                 |
| YLR106C        | [MDN1] Huge dynein-related AAA-type ATPase (midasin), forms extended pre-60S particle with the Rix1 complex (Rix1p-Ipi1p-Ipi3p), may mediate ATP-dependent remodeling of 60S subunits and subsequent export from nucleoplasm to cytoplasm midasin                                                                                                                                                                                                                   |
| YCL054W        | [SPB1] AdoMet-dependent methyltransferase involved in rRNA processing and 60S ribosomal subunit maturation; methylates G2922 in the tRNA docking site of the large subunit rRNA and in the absence of snR52, U2921; suppressor of PAB1 mutants AdoMet-dependent rRNA methyltransferase                                                                                                                                                                              |
| YGL099W        | [LSG1] Putative GTPase involved in 60S ribosomal subunit biogenesis; required for the release of Nmd3p from 60S subunits in the cytoplasm                                                                                                                                                                                                                                                                                                                           |
| YOL041C        | [NOP12] Nucleolar protein, required for pre-25S rRNA processing; contains an RNA recognition motif (RRM) and has similarity to Nop13p, Nsr1p, and putative orthologs in Drosophila and S. pombe Null mutant is viable and shows slow growth and cold sensitivity                                                                                                                                                                                                    |
| <b>YOL127W</b> | [RPL25] Primary rRNA-binding ribosomal protein component of the large (60S) ribosomal subunit, has similarity to E. coli L23 and rat L23a ribosomal proteins; binds to 26S rRNA via a conserved C-terminal motif ribosomal protein L25 (rpl6L) (YL25)                                                                                                                                                                                                               |
| YNL182C        | [IPI3] Protein required for cell viability; computational analysis of large-scale protein-protein interaction data suggests a possible role in assembly of the ribosomal large subunit                                                                                                                                                                                                                                                                              |
| YER002W        | [NOP16] Constituent of 66S pre-ribosomal particles, involved in 60S ribosomal subunit biogenesis ribosome biogenesis                                                                                                                                                                                                                                                                                                                                                |
| YLL034C        | [RIX7] Putative ATPase of the AAA family, required for export of pre-ribosomal large subunits from the nucleus; distributed between the nucleolus, nucleoplasm, and nuclear periphery depending on growth conditions                                                                                                                                                                                                                                                |
| <b>YGL030W</b> | [RPL30] Protein component of the large (60S) ribosomal subunit, has similarity to rat L30 ribosomal protein; involved in pre-rRNA processing in the nucleolus; autoregulates splicing of its transcript ribosomal protein L30 (L32) (rp73) (YL38) large subunit                                                                                                                                                                                                     |

|                  |                                                                                                                                                                                                                                                                                                                                                                                                                                                   |
|------------------|---------------------------------------------------------------------------------------------------------------------------------------------------------------------------------------------------------------------------------------------------------------------------------------------------------------------------------------------------------------------------------------------------------------------------------------------------|
| YOR294W          | [RRS1] Essential protein that binds ribosomal protein L11 and is required for nuclear export of the 60S pre-ribosomal subunit during ribosome biogenesis; mouse homolog shows altered expression in Huntington's disease model mice Null mutant is inviable. Rsr1p depletion causes defects in pre-rRNA processing and ribosome assembly. The rrs1-1 mutant exhibits reduced transcriptional repression of both rRNA and ribosomal protein genes. |
| YCR072C          | [RSA4] WD-repeat protein involved in ribosome biogenesis; required for maturation and efficient intra-nuclear transport or pre-60S ribosomal subunits, localizes to the nucleolus                                                                                                                                                                                                                                                                 |
| YHR085W          | [IPI1] Protein of unknown function, essential for viability, may be involved in rRNA processing                                                                                                                                                                                                                                                                                                                                                   |
| YKL172W          | [EBP2] Essential protein required for the maturation of 25S rRNA and 60S ribosomal subunit assembly, localizes to the nucleolus; constituent of 66S pre-ribosomal particles nucleolar protein                                                                                                                                                                                                                                                     |
| <b>YPL198W</b>   | [RPL7B] Protein component of the large (60S) ribosomal subunit, nearly identical to Rpl7Ap and has similarity to E. coli L30 and rat L7 ribosomal proteins; contains a conserved C-terminal Nucleic acid Binding Domain (NDB2) ribosomal protein L7B (L6B) (rp11) (YL8) Null mutant is viable; disruption of both RPL7A and RPL7B is lethal                                                                                                       |
| <b>YOL120C</b>   | [RPL18A] Protein component of the large (60S) ribosomal subunit, identical to Rpl18Bp and has similarity to rat L18 ribosomal protein; intron of RPL18A pre-mRNA forms stem-loop structures that are a target for Rnt1p cleavage leading to degradation ribosomal protein L18A (rp28A)                                                                                                                                                            |
| <b>YFR031C-A</b> | [RPL2A] Protein component of the large (60S) ribosomal subunit, identical to Rpl2Bp and has similarity to E. coli L2 and rat L8 ribosomal proteins ribosomal protein L2A (L5A) (rp8) (YL6)                                                                                                                                                                                                                                                        |
| <b>YDR012W</b>   | [RPL4B] Protein component of the large (60S) ribosomal subunit, nearly identical to Rpl4Ap and has similarity to E. coli L4 and rat L4 ribosomal proteins ribosomal protein L4B (L2B) (rp2) (YL2)                                                                                                                                                                                                                                                 |
| YLR449W          | [FPR4] Nuclear protein, putative peptidyl-prolyl cis-trans isomerase (PPIase) with similarity to Fpr3p; overproduction suppresses the growth defect resulting from the absence of E3 ubiquitin-protein ligase Tom1p peptidyl-prolyl cis-trans isomerase (PPIase)                                                                                                                                                                                  |
| <b>YGL076C</b>   | [RPL7A] Protein component of the large (60S) ribosomal subunit, nearly identical to Rpl7Bp and has similarity to E. coli L30 and rat L7 ribosomal proteins; contains a conserved C-terminal Nucleic acid Binding Domain (NDB2) ribosomal protein L7A (L6A) (rp11) (YL8) Null mutant is viable; grows more slowly than wild-type                                                                                                                   |
| YLR002C          | [NOC3] Protein that forms a nuclear complex with Noc2p that binds to 66S ribosomal precursors to mediate their intranuclear transport; also binds to chromatin to promote the association of DNA replication factors and replication initiation                                                                                                                                                                                                   |
| <b>YMR242C</b>   | [RPL20A] Protein component of the large (60S) ribosomal subunit, nearly identical to Rpl20Bp and has similarity to rat L18a ribosomal protein ribosomal protein L20A (L18A)                                                                                                                                                                                                                                                                       |
| YPR143W          | [RRP15] Nucleolar protein, constituent of pre-60S ribosomal particles; required for processing of the 27S pre-rRNA at the A2 site to yield 5.8S and 25S rRNA                                                                                                                                                                                                                                                                                      |
| YNR053C          | [NOG2] Putative GTPase that associates with pre-60S ribosomal subunits in the nucleolus and is required for their nuclear export and maturation part of a pre-60S complex                                                                                                                                                                                                                                                                         |
| YKL014C          | [URB1] Nucleolar protein required for the normal accumulation of 25S and 5.8S rRNAs, associated with the 27SA2 pre-ribosomal particle; proposed to be involved in the biogenesis of the 60S ribosomal subunit                                                                                                                                                                                                                                     |
| YLL008W          | [DRS1] Nucleolar DEAD-box protein required for ribosome assembly and function, including synthesis of 60S ribosomal subunits; constituent of 66S pre-ribosomal particles ATP dependent RNA helicase (putative)                                                                                                                                                                                                                                    |
| YHR197W          | [RIX1] Essential protein involved in the processing of the ITS2 region of the rRNA locus; required for the maturation and nuclear export of the 60S ribosomal subunit                                                                                                                                                                                                                                                                             |
| YBR142W          | [MAK5] Essential nucleolar protein, putative DEAD-box RNA helicase required for maintenance of M1 dsRNA virus; involved in biogenesis of large (60S) ribosomal subunits deficient in maintenance of killer                                                                                                                                                                                                                                        |
| YLR074C          | [BUD20] Protein involved in bud-site selection; diploid mutants display a random budding pattern instead of the wild-type bipolar pattern                                                                                                                                                                                                                                                                                                         |
| YGR245C          | [SDA1] Highly conserved nuclear protein required for actin cytoskeleton organization and passage through Start, plays a critical role in G1 events, binds Nap1p, also involved in 60S ribosome biogenesis                                                                                                                                                                                                                                         |
| YKL009W          | [MRT4] Protein involved in mRNA turnover and ribosome assembly, localizes to the nucleolus Null mutant exhibits slow growth. ts mutation results in decreased decay rates of mRNAs                                                                                                                                                                                                                                                                |
| <b>YHR010W</b>   | [RPL27A] Protein component of the large (60S) ribosomal subunit, nearly identical to Rpl27Bp and has similarity to rat L27 ribosomal protein ribosomal protein L27A                                                                                                                                                                                                                                                                               |
| YDR101C          | [ARX1] Shuttling pre-60S factor; involved in the biogenesis of ribosomal large subunit biogenesis; interacts directly with Alb1; responsible for Tif6 recycling defects in absence of Rei1; associated with the ribosomal export complex                                                                                                                                                                                                          |
| <b>YLL045C</b>   | [RPL8B] Ribosomal protein L4 of the large (60S) ribosomal subunit, nearly identical to Rpl8Ap and has similarity to rat L7a ribosomal protein; mutation results in decreased amounts of free 60S subunits ribosomal protein L8B (L4B) (rp6) (YL5) Null mutant is viable. rpl8a rpl8b mutants are inviable. The rpl8b allele, krb1, can suppress some mak mutations and represents a chromosomal rearrangement involving chromosome XII            |
| <b>YOR063W</b>   | [RPL3] Protein component of the large (60S) ribosomal subunit, has similarity to E. coli L3 and rat L3 ribosomal proteins; involved in the replication and maintenance of killer double stranded RNA virus ribosomal protein L3 (rp1) (YL1) Tricodermin resistance                                                                                                                                                                                |
| YER126C          | [NSA2] Constituent of 66S pre-ribosomal particles, involved in 60S ribosomal subunit biogenesis ribosome biogenesis Heterozygous diploid mutant exhibit haploinsufficiency K1 killer toxin resistance                                                                                                                                                                                                                                             |
| YNL175C          | [NOP13] Protein of unknown function, localizes to the nucleolus and nucleoplasm; contains an RNA recognition motif (RRM) and has similarity to Nop12p, which is required for processing of pre-18S rRNA                                                                                                                                                                                                                                           |
| YDR060W          | [MAK21] Constituent of 66S pre-ribosomal particles, required for large (60S) ribosomal subunit biogenesis; involved in nuclear export of pre-ribosomes; required for maintenance of dsRNA virus; homolog of human CAATT-binding protein deficient in maintenance of killer                                                                                                                                                                        |
| YDL031W          | [DBP10] Putative ATP-dependent RNA helicase of the DEAD-box protein family, constituent of 66S pre-ribosomal particles; essential protein involved in ribosome biogenesis                                                                                                                                                                                                                                                                         |
| YPL211W          | [NIP7] Nucleolar protein required for 60S ribosome subunit biogenesis, constituent of 66S pre-ribosomal particles; physically interacts with Nop8p and the exosome subunit Rrp43p Null mutant is inviable; in the temperature-sensitive mutant nip7-1, glycine 71 is replaced by aspartic acid                                                                                                                                                    |
| <b>YPL131W</b>   | [RPL5] Protein component of the large (60S) ribosomal subunit with similarity to E. coli L18 and rat L5 ribosomal proteins; binds 5S rRNA and is required for 60S subunit assembly ribosomal protein L5 (L1a)(YL3)                                                                                                                                                                                                                                |
| YPL043W          | [NOP4] Nucleolar protein, essential for processing and maturation of 27S pre-rRNA and large ribosomal subunit biogenesis; constituent of 66S pre-ribosomal particles; contains four RNA recognition motifs (RRMs) RNA binding protein (putative) Null mutant is inviable; conditional mutant shows diminished accumulation of 60S ribosomal subunits due to a lack of production of mature 25S rRNA from 27S precursor rRNA                       |

|         |                                                                                                                                                                                                                                                                                                                                                                                                                                                                                                                                                                                                                                                 |
|---------|-------------------------------------------------------------------------------------------------------------------------------------------------------------------------------------------------------------------------------------------------------------------------------------------------------------------------------------------------------------------------------------------------------------------------------------------------------------------------------------------------------------------------------------------------------------------------------------------------------------------------------------------------|
| YHR088W | [RPF1] Nucleolar protein involved in the assembly of the large ribosomal subunit; constituent of 66S pre-ribosomal particles; contains a sigma(70)-like motif, which is thought to bind RNA                                                                                                                                                                                                                                                                                                                                                                                                                                                     |
| YDR496C | [PUF6] Pumilio-homology domain protein that binds ASH1 mRNA at PUF consensus sequences in the 3' UTR and represses its translation, resulting in proper asymmetric localization of ASH1 mRNA Deletion reduces the asymmetric localization of both Ash1p and ASH1 mRNA and affects the HO promoter activity.                                                                                                                                                                                                                                                                                                                                     |
| YFL002C | [SPB4] Putative ATP-dependent RNA helicase, nucleolar protein required for synthesis of 60S ribosomal subunits at a late step in the pathway; sediments with 66S pre-ribosomes in sucrose gradients ATP dependent RNA helicase suppression of pab1 null mutant                                                                                                                                                                                                                                                                                                                                                                                  |
| YFR001W | [LOC1] Nuclear protein involved in asymmetric localization of ASH1 mRNA; binds double-stranded RNA in vitro; constituent of 66S pre-ribosomal particles Mutant exhibits slow growth at 30C                                                                                                                                                                                                                                                                                                                                                                                                                                                      |
| YNL002C | [RLP7] Nucleolar protein with similarity to large ribosomal subunit L7 proteins; constituent of 66S pre-ribosomal particles; plays an essential role in processing of precursors to the large ribosomal subunit RNAs Null mutant is inviable<br> required for an early step in large ribosomal subunit biogenesis                                                                                                                                                                                                                                                                                                                               |
| YNL110C | [NOP15] Constituent of 66S pre-ribosomal particles, involved in 60S ribosomal subunit biogenesis; localizes to both nucleolus and cytoplasm ribosome biogenesis                                                                                                                                                                                                                                                                                                                                                                                                                                                                                 |
| YER006W | [NUG1] GTPase that associates with nuclear 60S pre-ribosomes, required for export of 60S ribosomal subunits from the nucleus Nuclear GTPase involved in Ribosome biogenesis                                                                                                                                                                                                                                                                                                                                                                                                                                                                     |
| YDR087C | [RRP1] Essential evolutionarily conserved nucleolar protein necessary for biogenesis of 60S ribosomal subunits and processing of pre-rRNAs to mature rRNAs, associated with several distinct 66S pre-ribosomal particles Null mutant is inviable, cannot be suppressed by srd1 mutations. rrp1-1 mutations are associated with temperature-sensitive growth, a conditional defect in processing of 27S pre-rRNA to mature 25S rRNA, and a nonconditional increase in sensitivity to several aminoglycoside antibiotics. srd1 is an allele-specific suppressor of rrp1-1.                                                                        |
| YMR290C | [HAS1] ATP-dependent RNA helicase; localizes to both the nuclear periphery and nucleolus; highly enriched in nuclear pore complex fractions; constituent of 66S pre-ribosomal particles RNA-dependent helicase (putative)                                                                                                                                                                                                                                                                                                                                                                                                                       |
| YMR049C | [ERB1] Protein required for maturation of the 25S and 5.8S ribosomal RNAs; constituent of 66S pre-ribosomal particles; homologous to mammalian Bop1                                                                                                                                                                                                                                                                                                                                                                                                                                                                                             |
| YGL111W | [NSA1] Constituent of 66S pre-ribosomal particles, involved in 60S ribosomal subunit biogenesis ribosome biogenesis                                                                                                                                                                                                                                                                                                                                                                                                                                                                                                                             |
| YLR009W | [RLP24] Ribosomal Like Protein 24 part of a pre-60S complex                                                                                                                                                                                                                                                                                                                                                                                                                                                                                                                                                                                     |
| YHR066W | [SSF1] Constituent of 66S pre-ribosomal particles, required for ribosomal large subunit maturation; functionally redundant with Ssf2p; member of the Brix family Ssf2p homolog Null mutant is viable, ssf1 ssf2 double deletion mutants are inviable. SSF1 is a high copy suppressor of the mating defect caused by a temperature sensitive G beta subunit mutation. Depletion of SSF gene products from growing cultures caused both an arrest of cell division and a significant decrease in the ability of cells to mate. Mating efficiency was increased by extra copies of the SSF genes and decreased by elimination of the gene products |
| YPL093W | [NOG1] Putative GTPase that associates with free 60S ribosomal subunits in the nucleolus and is required for 60S ribosomal subunit biogenesis; constituent of 66S pre-ribosomal particles; member of the ODN family of nucleolar G-proteins homologs identified in human and Trypanosoma brucei nucleolar G-protein (putative)                                                                                                                                                                                                                                                                                                                  |
| YGR103W | [NOP7] Nucleolar protein involved in rRNA processing and 60S ribosomal subunit biogenesis; constituent of several different pre-ribosomal particles                                                                                                                                                                                                                                                                                                                                                                                                                                                                                             |
| YPR016C | [TIF6] Constituent of 66S pre-ribosomal particles, has similarity to human translation initiation factor 6 (eIF6); may be involved in the biogenesis and/or stability of 60S ribosomal subunits Null mutant is inviable; cells are depleted of 60S ribosomal subunits, translation initiation is inhibited, and cells arrest in G1                                                                                                                                                                                                                                                                                                              |
| YKR081C | [RPF2] Essential protein involved in the processing of pre-rRNA and the assembly of the 60S ribosomal subunit; interacts with ribosomal protein L11; localizes predominantly to the nucleolus; constituent of 66S pre-ribosomal particles                                                                                                                                                                                                                                                                                                                                                                                                       |
| YOL077C | [BRX1] Nucleolar protein, constituent of 66S pre-ribosomal particles; depletion leads to defects in rRNA processing and a block in the assembly of large ribosomal subunits; possesses a sigma(70)-like RNA-binding motif                                                                                                                                                                                                                                                                                                                                                                                                                       |
| YHR052W | [CIC1] Essential protein that interacts with proteasome components and has a potential role in proteasome substrate specificity; also copurifies with 66S pre-ribosomal particles Null: lethal. Other phenotypes: cic1-2 ts mutant stabilizes F-box proteins.                                                                                                                                                                                                                                                                                                                                                                                   |
| YOR272W | [YTM1] Constituent of 66S pre-ribosomal particles, required for maturation of the large ribosomal subunit microtubule-associated protein                                                                                                                                                                                                                                                                                                                                                                                                                                                                                                        |
| YNL061W | [NOP2] Probable RNA m(5)C methyltransferase, essential for processing and maturation of 27S pre-rRNA and large ribosomal subunit biogenesis; localized to the nucleolus; constituent of 66S pre-ribosomal particles 90 kDa protein homologous to a human proliferation-associated nucleolar protein, p120 Null mutant is inviable; overexpression leads to changes in nucleolar morphology                                                                                                                                                                                                                                                      |
| YOR206W | [NOC2] Protein that forms a nucleolar complex with Mak21p that binds to 90S and 66S pre-ribosomes, as well as a nuclear complex with Noc3p that binds to 66S pre-ribosomes; both complexes mediate intranuclear transport of ribosomal precursors                                                                                                                                                                                                                                                                                                                                                                                               |
| 0843    | GO_TERM:[biological_process] P-Value:9.6e-02                                                                                                                                                                                                                                                                                                                                                                                                                                                                                                                                                                                                    |
| YIL161W |                                                                                                                                                                                                                                                                                                                                                                                                                                                                                                                                                                                                                                                 |
| YNL023C | [FAP1] Protein that binds to Fpr1p (FKBP12), conferring rapamycin resistance by competing with rapamycin for Fpr1p binding; has similarity to putative transcription factors, including D. melanogaster shuttle craft and human NFX1 transcription factor homolog; similarity to Drosophila melanogaster shuttle craft protein; similarity to human NFX1 protein; similarity to human DNA-binding protein tenascin Null mutant is viable and shows no phenotype; overexpression confers rapamycin resistance                                                                                                                                    |
| 0844    | GO_TERM:[eukaryotic translation initiation factor 4F complex] P-Value:2.7e-08 OVERLAP:[eIF4E/eIF4G/Pab1p complex] <500.10.110> SIZE:3                                                                                                                                                                                                                                                                                                                                                                                                                                                                                                           |
| YER165W | [PAB1] Poly(A) binding protein, part of the 3'-end RNA-processing complex, mediates interactions between the 5' cap structure and the 3' mRNA poly(A) tail, involved in control of poly(A) tail length, interacts with translation factor eIF-4G poly(A) binding protein                                                                                                                                                                                                                                                                                                                                                                        |

|                |                                                                                                                                                                                                                                                                                                                                                                                                                                                                                                                                                     |
|----------------|-----------------------------------------------------------------------------------------------------------------------------------------------------------------------------------------------------------------------------------------------------------------------------------------------------------------------------------------------------------------------------------------------------------------------------------------------------------------------------------------------------------------------------------------------------|
| YBL032W        | [HEK2] RNA binding protein with similarity to hnRNP-K that localizes to the cytoplasm and to subtelomeric DNA; required for the proper localization of ASH1 mRNA; involved in the regulation of telomere position effect and telomere length Null: ASH1 mRNA is partially delocalized                                                                                                                                                                                                                                                               |
| <b>YOL139C</b> | [CDC33] Cytoplasmic mRNA cap binding protein; the eIF4E-cap complex is responsible for mediating cap-dependent mRNA translation via interactions with the translation initiation factor eIF4G (Tif4631p or Tif4632p) mRNA cap binding protein eIF-4E Null mutant is inviable. cdc33 mutants arrest at G(sub)1. cdc33 has normal cAMP pools and is not suppressed by cAPK mutants, suggesting sporulation is independent of the cAMP pathway                                                                                                         |
| YGL049C        | [TIF4632] Translation initiation factor eIF4G, subunit of the mRNA cap-binding protein complex (eIF4F) that also contains eIF4E (Cdc33p); associates with the poly(A)-binding protein Pab1p, also interacts with eIF4A (Tif1p); homologous to Tif4631p 150 kDa eIF-4F mRNA cap-binding complex subunit eIF-4G homolog Null mutant is viable; tif4631 tif4632 double disruption mutants are inviable                                                                                                                                                 |
| <b>YGR162W</b> | [TIF4631] Translation initiation factor eIF4G, subunit of the mRNA cap-binding protein complex (eIF4F) that also contains eIF4E (Cdc33p); associates with the poly(A)-binding protein Pab1p, also interacts with eIF4A (Tif1p); homologous to Tif4632p 150 kDa subunit Tif4632p and mammalian p220 homolog mRNA cap binding protein eIF-4F Null mutant is viable, grows slowly and is cold-sensitive. tif4631 tif4632 double deletion mutants are inviable                                                                                          |
| 0845           | GO_TERM:[regulation of translational fidelity] P-Value:1.7e-04 OVERLAP:[cytoplasmic ribosomal small subunit] <500.40.20> SIZE:57                                                                                                                                                                                                                                                                                                                                                                                                                    |
| <b>YMR116C</b> | [ASC1] WD repeat protein (G-beta like protein) involved in translation regulation; required for repression of Gcn4p activity in the absence of amino-acid starvation; core component of the ribosome; ortholog of mammalian RACK1 G-beta like protein Null mutant is viable. Null mutation suppresses the absence of growth of a cyp1- strain in anaerobiosis and also causes delayed growth in aerobic or heme sufficient conditions; trp auxotrophs of the asc1 null allele are cold sensitive for growth; other mutants have increased cell size |
| YGR285C        | [ZUO1] Cytosolic ribosome-associated chaperone that acts, together with Ssz1p and the Ssb proteins, as a chaperone for nascent polypeptide chains; contains a DnaJ domain and functions as a J-protein partner for Ssb1p and Ssb2p zootin, Z-DNA binding protein (putative)                                                                                                                                                                                                                                                                         |
| YHR064C        | [SSZ1] Hsp70 protein that interacts with Zuo1p (a DnaJ homolog) to form a ribosome-associated complex that binds the ribosome via the Zuo1p subunit; also involved in pleiotropic drug resistance via sequential activation of PDR1 and PDR5; binds ATP HSP70 family Null mutant is viable, cold sensitive; SSZ1 overexpression causes increased expression of some PDR genes                                                                                                                                                                       |
| 0846           | GO_TERM:[unannotated] P-Value:1.6e-02                                                                                                                                                                                                                                                                                                                                                                                                                                                                                                               |
| YGR283C        |                                                                                                                                                                                                                                                                                                                                                                                                                                                                                                                                                     |
| YMR310C        |                                                                                                                                                                                                                                                                                                                                                                                                                                                                                                                                                     |
| 0847           | GO_TERM:[IMP dehydrogenase activity] P-Value:8.0e-11                                                                                                                                                                                                                                                                                                                                                                                                                                                                                                |
| YHR216W        | [IMD2] Inosine monophosphate dehydrogenase, catalyzes the first step of GMP biosynthesis, expression is induced by mycophenolic acid resulting in resistance to the drug, expression is repressed by nutrient limitation IMP dehydrogenase homolog                                                                                                                                                                                                                                                                                                  |
| YLR432W        | [IMD3] Inosine monophosphate dehydrogenase, catalyzes the first step of GMP biosynthesis, member of a four-gene family in S. cerevisiae, constitutively expressed IMP dehydrogenase homolog                                                                                                                                                                                                                                                                                                                                                         |
| YML056C        | [IMD4] Inosine monophosphate dehydrogenase, catalyzes the first step of GMP biosynthesis, member of a four-gene family in S. cerevisiae, constitutively expressed IMP dehydrogenase homolog                                                                                                                                                                                                                                                                                                                                                         |
| 0848           | GO_TERM:[35S primary transcript processing] P-Value:3.4e-07 OVERLAP:[rRNA splicing] <440.30.20> SIZE:24                                                                                                                                                                                                                                                                                                                                                                                                                                             |
| YGL078C        | [DBP3] Putative ATP-dependent RNA helicase of the DEAD-box family involved in ribosomal biogenesis ATP dependent RNA helicase/dead/deah box protein CA3                                                                                                                                                                                                                                                                                                                                                                                             |
| YDL208W        | [NHP2] Nuclear protein related to mammalian high mobility group (HMG) proteins, essential for function of H/ACA-type snoRNPs, which are involved in 18S rRNA processing HMG-like protein                                                                                                                                                                                                                                                                                                                                                            |
| YHR072W-A      | [NOP10] Constituent of small nucleolar ribonucleoprotein particles containing H/ACA-type snoRNAs, which are required for pseudouridylation and processing of pre-18S rRNA H/ACA-box snoRNPs component                                                                                                                                                                                                                                                                                                                                               |
| <b>YHR089C</b> | [GAR1] Protein component of the H/ACA snoRNP pseudouridylyase complex, involved in the modification and cleavage of the 18S pre-rRNA small nucleolar RNP protein                                                                                                                                                                                                                                                                                                                                                                                    |
| 0849           | GO_TERM:[35S primary transcript processing] P-Value:2.3e-03                                                                                                                                                                                                                                                                                                                                                                                                                                                                                         |
| YOR145C        | [PNO1] Essential nucleolar protein required for pre-18S rRNA processing, interacts with Dim1p, an 18S rRNA dimethyltransferase, and also with Nob1p, which is involved in proteasome biogenesis; contains a KH domain Associated with Nob1 Essential for growth. Other phenotypes: temperature sensitive phenotype of pno1-1.                                                                                                                                                                                                                       |
| YPL266W        | [DIM1] Essential 18S rRNA dimethylase, responsible for conserved m6(2)Am6(2)A dimethylation in 3'-terminal loop of 18 S rRNA, part of 90S and 40S pre-particles in nucleolus, involved in pre-ribosomal RNA processing dimethyladenosine transferase                                                                                                                                                                                                                                                                                                |

|                |                                                                                                                                                                                                                                                                                                                                                                                                                                                               |
|----------------|---------------------------------------------------------------------------------------------------------------------------------------------------------------------------------------------------------------------------------------------------------------------------------------------------------------------------------------------------------------------------------------------------------------------------------------------------------------|
| 0850           | GO_TERM:[rRNA processing] P-Value:9.4e-66 OVERLAP:[rRNA splicing] <440.30.20> SIZE:24                                                                                                                                                                                                                                                                                                                                                                         |
| YNL207W        | [RIO2] Essential serine kinase involved in the processing of the 20S pre-rRNA into mature 18S rRNA; has similarity to Rio1p                                                                                                                                                                                                                                                                                                                                   |
| YOR056C        | [NOB1] Essential nuclear protein involved in proteasome maturation and synthesis of 40S ribosomal subunits; required for cleavage of the 20S pre-rRNA to generate the mature 18S rRNA Associated with the 26S proteasome                                                                                                                                                                                                                                      |
| YKR060W        | [UTP30] Possible U3 snoRNP protein involved in maturation of pre-18S rRNA, based on computational analysis of large-scale protein-protein interaction data                                                                                                                                                                                                                                                                                                    |
| YBR031W        | [RPL4A] N-terminally acetylated protein component of the large (60S) ribosomal subunit, nearly identical to Rpl4Bp and has similarity to E. coli L4 and rat L4 ribosomal proteins ribosomal protein L4A (L2A) (rp2) (YL2)                                                                                                                                                                                                                                     |
| YLR441C        | [RPS1A] Ribosomal protein 10 (rp10) of the small (40S) subunit; nearly identical to Rps1Bp and has similarity to rat S3a ribosomal protein ribosomal protein S1A (rp10A)                                                                                                                                                                                                                                                                                      |
| <b>YDR398W</b> | [UTP5] Nucleolar protein, component of the small subunit (SSU) processome containing the U3 snoRNA that is involved in processing of pre-18S rRNA U3 snoRNP protein                                                                                                                                                                                                                                                                                           |
| YEL055C        | [POL5] Protein with sequence similarity to the human MybBP1A and weak sequence similar to B-type DNA polymerases, not required for chromosomal DNA replication; required for the synthesis of rRNA DNA polymerase phi                                                                                                                                                                                                                                         |
| YDR299W        | [BFR2] Essential protein possibly involved in secretion; multicopy suppressor of sensitivity to Brefeldin A Null mutant is inviable; BFR2 overexpression can suppress the growth defect of mutants blocked at the step of budding or docking of small vesicles en route to the Golgi                                                                                                                                                                          |
| YML024W        | [RPS17A] Ribosomal protein 51 (rp51) of the small (40s) subunit; nearly identical to Rps17Bp and has similarity to rat S17 ribosomal protein ribosomal protein S17A (rp51A) Null mutant is viable and grows slowly; rps17A rps17B double null mutant is inviable                                                                                                                                                                                              |
| YJL033W        | [HCA4] Putative nucleolar DEAD box RNA helicase; high-copy number suppression of a U14 snoRNA processing mutant suggests an involvement in 18S rRNA synthesis RNA helicase (putative)                                                                                                                                                                                                                                                                         |
| YDR025W        | [RPS11A] Protein component of the small (40S) ribosomal subunit; identical to Rps11Bp and has similarity to E. coli S17 and rat S11 ribosomal proteins ribosomal protein S11A (S18A) (rp41A) (YS12)                                                                                                                                                                                                                                                           |
| YDR447C        | [RPS17B] Ribosomal protein 51 (rp51) of the small (40s) subunit; nearly identical to Rps17Ap and has similarity to rat S17 ribosomal protein ribosomal protein S17B (rp51B) Null mutant is viable, rp51a (rps17a) rp51b (rps17b) deletion mutants are inviable                                                                                                                                                                                                |
| YDL060W        | [TSR1] Protein required for processing of 20S pre-rRNA in the cytoplasm, associates with pre-40S ribosomal particles essential                                                                                                                                                                                                                                                                                                                                |
| YGR145W        | [ENP2] Essential nucleolar protein of unknown function; contains WD repeats, interacts with Mpp10p and Bfr2p, and has homology to Spb1p                                                                                                                                                                                                                                                                                                                       |
| YDR365C        | [ESF1] Nucleolar protein involved in pre-rRNA processing; depletion causes severely decreased 18S rRNA levels                                                                                                                                                                                                                                                                                                                                                 |
| YLR197W        | [SIK1] Essential evolutionarily-conserved nucleolar protein component of the box C/D snoRNP complexes that direct 2'-O-methylation of pre-rRNA during its maturation; overexpression causes spindle orientation defects U3 snoRNP protein wild-type gene suppresses toxicity of GAL4-I-Kappa-B alpha in yeast Other phenotypes: Shortens the G1 phase of the cell cycle when present in high-copy                                                             |
| YLR175W        | [CBF5] Component of box H/ACA small nucleolar ribonucleoprotein particles (snoRNPs), probable rRNA pseudouridine synthase, binds to snoRNP Nop10p and also interacts with ribosomal biogenesis protein Nop53p major low affinity 55 kDa centromere/microtubule binding protein                                                                                                                                                                                |
| YDL213C        | [NOP6] Protein with similarity to hydrophilins, which are involved in the adaptive response to hyperosmotic conditions; computational analysis of large-scale protein-protein interaction data suggests a possible role in rRNA processing                                                                                                                                                                                                                    |
| YNL308C        | [KRI1] Essential nucleolar protein required for 40S ribosome biogenesis; physically and functionally interacts with Krr1p Krr1p binding protein                                                                                                                                                                                                                                                                                                               |
| YPL012W        | [RRP12] Protein required for export of the ribosomal subunits; associates with the RNA components of the pre-ribosomes; contains HEAT-repeats                                                                                                                                                                                                                                                                                                                 |
| YBL072C        | [RPS8A] Protein component of the small (40S) ribosomal subunit; identical to Rps8Ap and has similarity to rat S8 ribosomal protein ribosomal protein S8A (S14A) (rp19) (YS9)                                                                                                                                                                                                                                                                                  |
| YDR064W        | [RPS13] Protein component of the small (40S) ribosomal subunit; has similarity to E. coli S15 and rat S13 ribosomal proteins ribosomal protein S13 (S27a) (YS15)                                                                                                                                                                                                                                                                                              |
| YNL075W        | [IMP4] Component of the SSU processome, which is required for pre-18S rRNA processing; interacts with Mpp10p; member of a superfamily of proteins that contain a sigma(70)-like motif and associate with RNAs U3 snoRNP protein                                                                                                                                                                                                                               |
| YOR096W        | [RPS7A] Protein component of the small (40S) ribosomal subunit, nearly identical to Rps7Bp; interacts with Kti11p; deletion causes hypersensitivity to zymocin; has similarity to rat S7 and Xenopus S8 ribosomal proteins ribosomal protein S7A (rp30)                                                                                                                                                                                                       |
| YHR203C        | [RPS4B] Protein component of the small (40S) ribosomal subunit; identical to Rps4Bp and has similarity to rat S4 ribosomal protein ribosomal protein S4B (YS6) (rp5) (S7B)                                                                                                                                                                                                                                                                                    |
| YJR145C        | [RPS4A] Protein component of the small (40S) ribosomal subunit; mutation affects 20S pre-rRNA processing; identical to Rps4Bp and has similarity to rat S4 ribosomal protein ribosomal protein S4A (YS6) (rp5) (S7A) Null mutant is viable; rps4a rps4b double deletion is inviable                                                                                                                                                                           |
| YPL217C        | [BMS1] Essential conserved nucleolar GTP-binding protein required for synthesis of 40S ribosomal subunits and for processing of the 35S pre-rRNA at sites A0, A1, and A2; interacts with Rcl1p, has similarity to Tsr1p Null mutant is inviable; a temperature-sensitive allele exhibits a synthetic growth defect with bmh1-delta; the temperature-sensitive allele also exhibits diploid specific bud site randomization at the semi-permissive temperature |
| YOL010W        | [RCL1] RNA terminal phosphate cyclase-like protein involved in rRNA processing at sites A0, A1, and A2; does not possess detectable RNA cyclase activity                                                                                                                                                                                                                                                                                                      |
| YMR128W        | [ECM16] Essential DEAH-box ATP-dependent RNA helicase specific to the U3 snoRNP, predominantly nucleolar in distribution, required for 18S rRNA synthesis U3 snoRNP protein A Tn3 insertion into this gene causes hypersensitivity to the cell surface polymer perturbing agent calcofluor white.                                                                                                                                                             |
| YLL011W        | [SOF1] Essential subunit of the U3 (box C+D) snRNP complex required for 2' O-methylation of pre-rRNA; has similarity to the beta subunit of trimeric G-proteins and the splicing factor Prp4p U3 snoRNP protein Null mutant is inviable. sof1-56, a dominant suppressor of nop1 mutants can restore growth and pre-rRNA processing at 35 degrees C. In vivo depletion of SOF1 leads to impaired pre-rRNA processing and inhibition of 18S rRNA production.    |
| YNR054C        | [ESF2] Essential nucleolar protein involved in pre-18S rRNA processing; component of the small subunit (SSU) processome; has sequence similarity to mABT1, a mouse transcription activator                                                                                                                                                                                                                                                                    |

|                |                                                                                                                                                                                                                                                                                                                                                                                                                                                                                                                             |
|----------------|-----------------------------------------------------------------------------------------------------------------------------------------------------------------------------------------------------------------------------------------------------------------------------------------------------------------------------------------------------------------------------------------------------------------------------------------------------------------------------------------------------------------------------|
| YNL132W        | [KRE33] Essential protein of unknown function; heterozygous mutant shows haploinsufficiency in K1 killer toxin resistance Heterozygous diploid mutant exhibit haploinsufficiency K1 killer toxin resistance                                                                                                                                                                                                                                                                                                                 |
| YLR186W        | [EMG1] Protein required for the maturation of the 18S rRNA and for 40S ribosome production; associated with spindle/microtubules; nuclear localization depends on physical interaction with Nop14p; may bind snoRNAs ribosome biogenesis                                                                                                                                                                                                                                                                                    |
| <b>YDL014W</b> | [NOP1] Nucleolar protein, component of the small subunit processome complex, which is required for processing of pre-18S rRNA; has similarity to mammalian fibrillarin U3 snoRNP protein similar to mammalian fibrillarin Null mutant is inviable. Temperature-sensitive alleles exhibit various defects in rRNA processing.]                                                                                                                                                                                               |
| <b>YLR222C</b> | [UTP13] Nucleolar protein, component of the small subunit (SSU) processome containing the U3 snoRNA that is involved in processing of pre-18S rRNA U3 snoRNP protein                                                                                                                                                                                                                                                                                                                                                        |
| YLR129W        | [DIP2] Nucleolar protein, specifically associated with the U3 snoRNA, part of the large ribonucleoprotein complex known as the small subunit (SSU) processome, required for 18S rRNA biogenesis, part of the active pre-rRNA processing complex U3 snoRNP protein                                                                                                                                                                                                                                                           |
| YLR409C        | [UTP21] Possible U3 snoRNP protein involved in maturation of pre-18S rRNA, based on computational analysis of large-scale protein-protein interaction data U3 snoRNP protein                                                                                                                                                                                                                                                                                                                                                |
| YJL069C        | [UTP18] Possible U3 snoRNP protein involved in maturation of pre-18S rRNA, based on computational analysis of large-scale protein-protein interaction data U3 snoRNA associated protein U3 snoRNP protein Null: lethal. Other phenotypes: required for 18S RNA production                                                                                                                                                                                                                                                   |
| YHR148W        | [IMP3] Component of the SSU processome, which is required for pre-18S rRNA processing, essential protein that interacts with Mpp10p and mediates interactions of Imp4p and Mpp10p with U3 snoRNA U3 snoRNP protein Null mutant is inviable. Depletion of Imp3p prevents the synthesis of mature 18S rRNA.                                                                                                                                                                                                                   |
| YBL004W        | [UTP20] Component of the small-subunit (SSU) processome, which is involved in the biogenesis of the 18S rRNA U3 snoRNP protein                                                                                                                                                                                                                                                                                                                                                                                              |
| YBR247C        | [ENP1] Protein associated with U3 and U14 snoRNAs, required for pre-rRNA processing and 40S ribosomal subunit synthesis; localized in the nucleus and concentrated in the nucleolus 57 kDa protein with an apparent MW of 70 kDa by SDS-PAGE (putative)                                                                                                                                                                                                                                                                     |
| YMR229C        | [RRP5] Protein required for the synthesis of both 18S and 5.8S rRNA; C-terminal region is crucial for the formation of 18S rRNA and N-terminal region is required for the 5.8S rRNA; component of small ribosomal subunit (SSU) processome U3 snoRNP protein Overexpression of RRP5 facilitates mitochondrial import of hydrophobic proteins; overexpression of an RRP5 mutant complements the rRNA processing defect of the null allele, but does not facilitate mitochondrial import; required for processing of pre-rRNA |
| YOR310C        | [NOP58] Protein involved in pre-rRNA processing, 18S rRNA synthesis, and snoRNA synthesis; component of the small subunit processome complex, which is required for processing of pre-18S rRNA U3 snoRNP protein Null mutant is inviable; in vivo depletion impairs synthesis of the 40S ribosomal subunit                                                                                                                                                                                                                  |
| YDL148C        | [NOP14] Nucleolar protein, forms a complex with Noc4p that mediates maturation and nuclear export of 40S ribosomal subunits; also present in the small subunit processome complex, which is required for processing of pre-18S rRNA U3 snoRNP protein                                                                                                                                                                                                                                                                       |
| YGR090W        | [UTP22] Possible U3 snoRNP protein involved in maturation of pre-18S rRNA, based on computational analysis of large-scale protein-protein interaction data                                                                                                                                                                                                                                                                                                                                                                  |
| YCL059C        | [KRR1] Essential nucleolar protein required for the synthesis of 18S rRNA and for the assembly of 40S ribosomal subunit                                                                                                                                                                                                                                                                                                                                                                                                     |
| YPR144C        | [NOC4] Nucleolar protein, forms a complex with Nop14p that mediates maturation and nuclear export of 40S ribosomal subunits U3 snoRNP protein Null: lethal. Other phenotypes: required for 18S RNA production                                                                                                                                                                                                                                                                                                               |
| YOR078W        | [BUD21] Component of small ribosomal subunit (SSU) processome that contains U3 snoRNA; originally isolated as bud-site selection mutant that displays a random budding pattern U3 snoRNP protein Null mutant is viable; random budding in diploid null mutants; null has both reduced growth and reduced protein synthesis rates                                                                                                                                                                                            |
| YPR137W        | [RRP9] Protein involved in pre-rRNA processing, associated with U3 snRNP; component of small ribosomal subunit (SSU) processome; ortholog of the human U3-55k protein U3 snoRNP protein null mutant is inviable; genetic depletion inhibits pre-rRNA processing at sites A0, A1 and A2, and thereby inhibits synthesis of 18S rRNA                                                                                                                                                                                          |
| YCR057C        | [PWP2] Conserved 90S pre-ribosomal component essential for proper endonucleolytic cleavage of the 35 S rRNA precursor at A0, A1, and A2 sites; contains eight WD-repeats; PWP2 deletion leads to defects in cell cycle and bud morphogenesis U3 snoRNP protein                                                                                                                                                                                                                                                              |
| YIL019W        | [FAF1] Protein required for pre-rRNA processing and 40S ribosomal subunit assembly                                                                                                                                                                                                                                                                                                                                                                                                                                          |
| <b>YER082C</b> | [UTP7] Nucleolar protein, component of the small subunit (SSU) processome containing the U3 snoRNA that is involved in processing of pre-18S rRNA U3 snoRNP protein Heterozygous diploid mutant exhibit haploinsufficiency K1 killer toxin resistance                                                                                                                                                                                                                                                                       |
| <b>YHR196W</b> | [UTP9] Nucleolar protein, component of the small subunit (SSU) processome containing the U3 snoRNA that is involved in processing of pre-18S rRNA U3 snoRNP protein                                                                                                                                                                                                                                                                                                                                                         |
| <b>YDR449C</b> | [UTP6] Nucleolar protein, component of the small subunit (SSU) processome containing the U3 snoRNA that is involved in processing of pre-18S rRNA U3 snoRNP protein                                                                                                                                                                                                                                                                                                                                                         |
| YMR093W        | [UTP15] Nucleolar protein, component of the small subunit (SSU) processome containing the U3 snoRNA that is involved in processing of pre-18S rRNA U3 snoRNP protein                                                                                                                                                                                                                                                                                                                                                        |
| <b>YJL109C</b> | [UTP10] Nucleolar protein, component of the small subunit (SSU) processome containing the U3 snoRNA that is involved in processing of pre-18S rRNA U3 snoRNP protein                                                                                                                                                                                                                                                                                                                                                        |
| YJR002W        | [MPP10] Component of the SSU processome, which is required for pre-18S rRNA processing, interacts with and controls the stability of Imp3p and Imp4p, essential for viability; similar to human Mpp10p U3 snoRNP protein                                                                                                                                                                                                                                                                                                    |
| <b>YDR324C</b> | [UTP4] Nucleolar protein, component of the small subunit (SSU) processome containing the U3 snoRNA that is involved in processing of pre-18S rRNA U3 snoRNP protein                                                                                                                                                                                                                                                                                                                                                         |
| <b>YGR128C</b> | [UTP8] Nucleolar protein required for export of tRNAs from the nucleus; also copurifies with the small subunit (SSU) processome containing the U3 snoRNA that is involved in processing of pre-18S rRNA U3 snoRNP protein                                                                                                                                                                                                                                                                                                   |
| YPL126W        | [NAN1] U3 snoRNP protein, component of the small (ribosomal) subunit (SSU) processome containing U3 snoRNA; required for the biogenesis of 18S rRNA U3 snoRNP protein                                                                                                                                                                                                                                                                                                                                                       |
